# Supplementary material
Source: PubMed Central journal article supplement (PMC10518852)
Supplement: NIHMS1921827-supplement-Apend_2.pdf [file NIHMS1921827-supplement-Apend_2.pdf]

**SUPPLEMENTARY APPENDIX 2: Evidence Report**

**ACR/AF 2019 Guideline for the Management of Osteoarthritis of the Hand, Hip and Knee**

**Osteoarthritis – Evidence Report**

Prepared for: American College of Rheumatology

Literature review team:

James Reston PhD, MPH

Joann Fontanarosa, PhD

Gina Giradi, MS

Marat Turgunbaev MD, MPH

Amit Aakash Shah MD, MPH

Dana Direnzo, MD

Anna Shmagel, MD

Mariko Ishimori, MD

Devyani Misra, MD

Louise Thoma, MD

## Introduction

### Critical outcomes

- Each table reports the summary of findings from randomized trials and/or systematic reviews reporting the critical outcomes. The critical outcomes, as chosen by the Core Team, differed somewhat for assessment of hand OA and assessment of hip or knee OA.
- For hand OA, critical outcomes included measures of pain (AUSCAN, DASH, MHQ, PRWE, QuickDASH, VAS), self-reported function (AUSCAN, Cochin, DASH, FIHOA, MHQ, PRWE, QuickDASH), performance-based function (AHFT, COPM, GAT, grip strength, pinch strength, JFHT, MAM), and serious adverse events.
- For hip or knee OA, critical outcomes included measures of pain (WOMAC, KOOS, HOOS, VAS, SF-36 bodily pain, HAQ, AIMS, KSPS, McGill pain questionnaire, NRS), self-reported function (WOMAC, KOOS, HOOS, SF-36 physical function, PCS, HAQ [disability], PDI, ASES), performance-based function (chair stand test, gait speed [short distance], stair negotiation, timed up and go test, 6 minute walk test), and serious adverse events.
- Note that serious adverse events are very rare, and thus it is quite difficult to achieve a statistically significant difference between groups for this outcome in randomized trials powered for efficacy outcomes that occur much more often.
- Included studies examined one or more critical outcomes. Each outcome was analyzed separately.

### Interventions

- The following interventions were within the scope of this guideline:
  - Pharmacologic – oral (acetaminophen, anti-depressants, bisphosphonates, chondroitin, colchicine, fish oil, glucosamine, glucosamine/chondroitin, hydroxychloroquine, methotrexate, non-tramadol opioids, oral NSAIDs, tramadol, vitamin D)
  - Pharmacologic – topical (capsaicin, lidocaine, NSAIDs)
  - Pharmacologic – biologics (anti-nerve growth factor, tumor necrosis factor inhibitor, interleukin-1 receptor antagonist)
  - Pharmacologic – intra-articular (corticosteroids [long or short-acting, high or low dose], hyaluronic acid, platelet rich plasma, prolotherapy, mesenchymal stem cells, botulinum toxin, saline, anesthetic)
  - Non-pharmacologic (acupuncture, assistive devices, chiropractic manipulation, electrical stimulation, TENS, exercise, gloves, iontophoresis, joint stabilization, kinesiotape, nerve ablation, occupational therapy, orthoses, osteopathic manipulation, paraffin, patient education, physical activity, physical therapy, relaxation techniques, strengthening, therapeutic cooling, therapeutic heat [including ultrasound], work modification, cognitive behavioral therapy, manual therapy, massage therapy, mind-body practices, patellofemoral taping, pulsed vibration therapy, self-efficacy/self-management, walking, weight loss)
  - Usual care was defined as maximally tolerable therapeutic doses of acetaminophen or NSAIDs

## Systematic Literature Review

- Randomized controlled trials (RCTs) were the preferred source of evidence. We used systematic reviews as an additional resource to identify relevant RCTs, but if a systematic review focused solely on RCTs it was not used in the evidence base. Instead, we tabled data from individual RCTs in RevMan to perform our own independent meta-analyses. In some instances, evidence from systematic reviews was used as supplementary evidence if it provided data from RCTs and observational studies or observational study data alone that was particularly relevant.

## Quality Assessment

- Quality assessment was performed separately for each outcome using the GRADE system, which results in one of four possible evidence grades that reflect level of confidence in the effect estimate: high, moderate, low, and very low.
- Study design is the starting point for quality assessment: randomized controlled trials (RCTs) start at high quality and observational studies start at low quality.
- Five factors can lower the quality of evidence grade: risk of bias, inconsistency, indirectness, imprecision, and publication bias.
- Risk of bias refers to limitations in study design or execution (e.g. lack of allocation concealment or blinding).
- Inconsistency refers to unexplained heterogeneity in results of studies evaluating the same outcome.
- Indirectness refers to lack of direct comparisons of interventions of interest (e.g. studies comparing drug A vs. placebo and drug B vs. placebo when the comparison of interest is drug A vs. drug B), lack of applicability in the interventions or populations being evaluated, or use of indirect (surrogate) outcome measures.
- Imprecision refers to uncertainty in the estimate of effect due to very low numbers of patients or events and/or wide 95% confidence intervals that cross a clinical decision threshold (i.e. between recommending and not recommending treatment).
- Publication bias refers to selective publication of studies that show greater treatment effects (i.e. negative studies are suppressed).
- Quality of evidence can vary from outcome to outcome. The final quality assessment for the PICO question is based on the critical outcome with the lowest quality assessment.
- The level of evidence listed in this report for either an individual paper or a group of papers is not meant to be an absolute statement about the quality of the study (or studies) under consideration. Rather, the intention is to rate the paper(s) *in relation to the question being asked in this guideline*. Because of this, a very well conducted study might actually be rated down in this evidence report, possible reasons including that the population or intervention being studied does not completely match the population or intervention being examined by the PICO question in this guideline (in other words, downgrading for indirectness). The level of evidence may also be downgraded due to imprecision in the effect estimate (wide confidence intervals that cross the line of no effect, or a low number of patients or events). A combination of these factors may result in quality of evidence from a well-conducted study being rated as low.

## Presentation of effects

- The treatment effects from continuous outcomes are presented as mean difference (MD) or standardized mean difference (SMD). The latter measure was used in instances where different measuring scales were combined in the analysis. For consistency of presentation, in some instances SMD was also used for evidence from single study comparisons in the same table where SMD was used for combined study comparisons.
- The treatment effects from binary (yes or no) outcomes are presented as relative effects and absolute effects.
- Relative effects capture the difference between intervention and control in relative terms. For example, a 10% event rate in controls and a 5% event rate in the intervention represents a 50% relative risk reduction ( $10\% - 5\% / 10\%$ )
- The same difference represents a 5% absolute risk reduction ( $10\% - 5\% = 5\%$ ). In general, for patients, the absolute effect is the most important.
- Relative effects for dichotomous outcomes in the tables are expressed as odds ratios (OR).
- In the tables, when OR is specified, the first intervention (e.g. NSAID or acetaminophen or placebo) is the reference intervention.

## Evidence Summaries including Summary of Findings (= Tables under each PICO question, except some PICO questions for which no evidence was available)

- Whenever possible, data from different studies was combined and presented in GRADE summary-of-findings tables.
- A random effects meta-analysis (conducted in Review Manager) was performed to combine data from two or more studies
- Direct comparisons are situations where trials directly compare drug A to drug B within one of the patient subgroups covered in this guideline.
- Indirect comparisons: Some studies do not include a direct comparison of drugs or interventions specified in a given PICO question. For example, if a question specifies duloxetine versus NSAIDs as the comparison of interest, a trial that compares duloxetine plus NSAIDs to placebo plus NSAIDs indirectly addresses the question.
- Data from some studies could not be presented in GRADE summary-of-findings tables. This was usually because the studies did not report measures of dispersion (e.g. standard deviation, 95% confidence interval) that are necessary for calculation of between-group effect size estimates. In such instances we summarized the data in Word tables that follow the GRADE evidence tables under a given PICO question.

## Interpreting the evidence

- It is important to take into account the information presented specifically as it relates to the question of interest. For example, when the only evidence for a given PICO question is indirect due to the comparison or patient population, it appropriately gets downgraded for indirectness as shown under the column labeled “indirectness.” Also, if the 95% confidence interval around an effect size is wide and

crosses the line of no difference between treatments, the evidence for that outcome is downgraded due to imprecision. Study design and risk of bias also may result in downgrades in the quality of evidence. The overall quality of evidence takes all these factors into account, and is appropriately rated as high, moderate, low or very low. This quality of evidence is key to your decisions.

### **Moving from evidence to recommendations**

- In GRADE, recommendations can be either strong or conditional. Generally, strong recommendations are restricted to high or moderate quality evidence. Low quality evidence almost invariably mandates a weak recommendation.
- There are, however, situations in which low quality evidence can lead to strong recommendations. For instance, if there is low quality evidence favoring an intervention but high quality evidence of important harm then a strong recommendation against the intervention may be appropriate.

### **Bibliography of included studies**

- A complete list of studies included as evidence for this report will appear at the end of this document upon completion of the literature search update. Shorter lists of studies included for each PICO question with an evidence base appear at the end of the summaries for each question

## Hip and/or Knee Osteoarthritis

### **PICO 1: Aerobic training vs. usual care for knee and/or hip OA**

Summary: Sixteen RCTs<sup>[1-16]</sup> of adults with knee OA and one RCT of adults with hip OA<sup>[17]</sup> evaluated aerobic training as treatment for knee OA compared to usual care. In samples with knee OA, eight studies<sup>[1-6,14-16]</sup> evaluated an intervention that consisted primarily of aerobic exercise, while the other seven studies<sup>[7-13]</sup> investigated interventions of aerobic exercise combined with strength training. Most interventions were 6-12 weeks, while others were 12-18 months<sup>[4,10,14]</sup>.

In studies testing aerobic exercise only interventions, the meta-analysis indicated that the intervention group reported greater improvement in pain and self-reported function after a 6-12 week intervention<sup>[1-3,15]</sup>, however these differences in pain were not sustained one year later<sup>[5]</sup>. There was no long term follow-up for self-reported function. There were no differences in pain and self-reported function between groups after a 1 year intervention, however the confidence in this result is low due to wide confidence intervals around the effect estimates.<sup>[4,14]</sup> The intervention group also demonstrated greater improvements for the 6MWT<sup>[6]</sup> and stair climbing<sup>[6]</sup>. There were mixed results for gait speed and the chair stand test, and the level of confidence of these outcomes were low as they were each only assessed in one study with a small sample size.<sup>[1,2]</sup>

In studies testing combined aerobic and strength training interventions, the results were mixed. The intervention group reported greater improvements in pain at short-term (3 month) follow-up<sup>[7]</sup>. There were no differences reported for pain or self-reported function after a 8-24 week<sup>[7-9,11]</sup> or 18 month intervention<sup>[10]</sup>, however there is low confidence in these estimates due to wide confidence intervals. The results were also mixed for performance-based function. Those in the intervention group demonstrated greater improvements in the 6MWT after an 18 month intervention<sup>[10]</sup>, on the 6MWT, TUG, and stair descent at short-term (3-6 month) follow-up.<sup>[7,12]</sup> There were no differences observed for the outcomes at other time points; however, imprecision was high due to wide confidence intervals around the effect estimates.

Teirlinck et al.<sup>[17]</sup> investigated aerobic exercise for people with hip OA. They observed that the intervention group had greater improvements in self-reported function after the intervention and in self-reported and performance-based function (TUG) at follow up. There were no significant between-group differences in pain; however, the confidence in the pain estimates is low due to wide confidence intervals around the effect estimates.

A literature search update in August 2018 identified two additional RCTs that addressed this comparison.<sup>[18,19]</sup> The findings of these studies did not alter the overall findings presented in the tables below.

Quality of evidence across all critical outcomes: Moderate

**Table 1. Aerobic exercise compared to Usual care for Knee OA**

| <b>Table 1. Aerobic exercise compared to Usual care for Knee OA</b>                       |                      |                      |                     |                      |                         |                                      |                                    |                              |                                 |                                         |                                                                                  |
|-------------------------------------------------------------------------------------------|----------------------|----------------------|---------------------|----------------------|-------------------------|--------------------------------------|------------------------------------|------------------------------|---------------------------------|-----------------------------------------|----------------------------------------------------------------------------------|
| <b>Certainty assessment</b>                                                               |                      |                      |                     |                      |                         |                                      | <b>Summary of findings</b>         |                              |                                 |                                         |                                                                                  |
| <b>Nº of participants (studies) Follow-up</b>                                             | <b>Risk of bias</b>  | <b>Inconsistency</b> | <b>Indirectness</b> | <b>Imprecision</b>   | <b>Publication bias</b> | <b>Overall certainty of evidence</b> | <b>Number of participants</b>      |                              | <b>Relative effect (95% CI)</b> | <b>Anticipated absolute effects</b>     |                                                                                  |
|                                                                                           |                      |                      |                     |                      |                         |                                      | <b>With Usual care for Knee OA</b> | <b>With Aerobic exercise</b> |                                 | <b>Risk with Usual care for Knee OA</b> | <b>Risk difference with Aerobic exercise</b>                                     |
| <b>Pain - pre/post 6-12 week intervention (lower scores indicate improvement)</b>         |                      |                      |                     |                      |                         |                                      |                                    |                              |                                 |                                         |                                                                                  |
| 261 (5 RCTs)                                                                              | serious <sup>a</sup> | not serious          | not serious         | not serious          | none                    | ⊕⊕⊕○<br>MODERATE                     | 115                                | 146                          | -                               | -                                       | SMD <b>0.45 lower</b><br>(0.88 lower to 0.02 lower)<br><br><b>Favors aerobic</b> |
| <b>Pain - 1 year follow up (6-12 wk intervention) (lower scores indicate improvement)</b> |                      |                      |                     |                      |                         |                                      |                                    |                              |                                 |                                         |                                                                                  |
| 52 (1 RCT)                                                                                | serious <sup>a</sup> | not serious          | not serious         | serious <sup>b</sup> | none                    | ⊕⊕○○<br>LOW                          | 23                                 | 29                           | -                               | -                                       | SMD <b>0.4 lower</b><br>(0.95 lower to 0.16 higher)                              |
| <b>Pain - pre/post 1 year intervention (lower scores indicate improvement)</b>            |                      |                      |                     |                      |                         |                                      |                                    |                              |                                 |                                         |                                                                                  |
| 160 (2 RCTs)                                                                              | serious <sup>a</sup> | not serious          | not serious         | serious <sup>b</sup> | none                    | ⊕⊕○○<br>LOW                          | 81                                 | 79                           | -                               | -                                       | SMD <b>0.11 lower</b><br>(0.42 lower to 0.2 higher)                              |

**Table 1. Aerobic exercise compared to Usual care for Knee OA**

| Certainty assessment                                                                                        |                      |             |             |                      |      | Summary of findings |    |    |   |   |                                                                                  |
|-------------------------------------------------------------------------------------------------------------|----------------------|-------------|-------------|----------------------|------|---------------------|----|----|---|---|----------------------------------------------------------------------------------|
| <b>Pain - 6 month follow up (1 year intervention) (lower scores indicate improvement)</b>                   |                      |             |             |                      |      |                     |    |    |   |   |                                                                                  |
| 78<br>(1 RCT)                                                                                               | serious <sup>a</sup> | not serious | not serious | serious <sup>b</sup> | none | ⊕⊕○○<br>LOW         | 35 | 43 | - | - | SMD <b>0.01 higher</b><br>(0.44 lower to 0.45 higher)                            |
| <b>Self-reported function - pre/post 6-12 week follow-up (lower scores indicate better function)</b>        |                      |             |             |                      |      |                     |    |    |   |   |                                                                                  |
| 56<br>(2 RCTs)                                                                                              | serious <sup>a</sup> | not serious | not serious | not serious          | none | ⊕⊕⊕○<br>MODERATE    | 29 | 27 | - | - | SMD <b>0.81 lower</b><br>(1.36 lower to 0.26 lower)<br><br><b>Favors aerobic</b> |
| <b>Self-reported function - pre/post 1 year intervention (lower scores indicate improvement)</b>            |                      |             |             |                      |      |                     |    |    |   |   |                                                                                  |
| 160<br>(2 RCTs)                                                                                             | serious <sup>a</sup> | not serious | not serious | serious <sup>b</sup> | none | ⊕⊕○○<br>LOW         | 80 | 80 | - | - | SMD <b>0.23 lower</b><br>(0.6 lower to 0.15 higher)                              |
| <b>Self-reported function - 6 month follow up (1 year intervention) (lower scores indicate improvement)</b> |                      |             |             |                      |      |                     |    |    |   |   |                                                                                  |
| 78<br>(1 RCT)                                                                                               | serious <sup>a</sup> | not serious | not serious | serious <sup>b</sup> | none | ⊕⊕○○<br>LOW         | 35 | 43 | - | - | SMD <b>0.08 lower</b><br>(0.52 lower to 0.37 higher)                             |



**Table 1. Aerobic exercise compared to Usual care for Knee OA**

| Certainty assessment                                                |                      |             |             |                      |      | Summary of findings |     |     |   |   |                                                                                        |
|---------------------------------------------------------------------|----------------------|-------------|-------------|----------------------|------|---------------------|-----|-----|---|---|----------------------------------------------------------------------------------------|
| <b>6-min walk test (higher numbers indicate improvement)</b>        |                      |             |             |                      |      |                     |     |     |   |   |                                                                                        |
| 412<br>(3 RCTs)                                                     | serious <sup>a</sup> | not serious | not serious | not serious          | none | ⊕⊕⊕○<br>MODERATE    | 207 | 205 | - | - | MD <b>98.65 higher</b><br>(23.57 higher to 173.73 higher)<br><br><b>Favors aerobic</b> |
| <b>Stair climbing time (lower scores indicate improvement)</b>      |                      |             |             |                      |      |                     |     |     |   |   |                                                                                        |
| 293<br>(1 RCT)                                                      | serious <sup>a</sup> | not serious | not serious | not serious          | none | ⊕⊕⊕○<br>MODERATE    | 149 | 144 | - | - | MD <b>1.2 lower</b><br>(2.31 lower to 0.09 lower)<br><br><b>Favors aerobic</b>         |
| <b>Chair stand</b>                                                  |                      |             |             |                      |      |                     |     |     |   |   |                                                                                        |
| 27<br>(1 RCT)                                                       | serious <sup>a</sup> | not serious | not serious | serious <sup>c</sup> | none | ⊕⊕○○<br>LOW         | 13  | 14  | - | - | MD <b>1.03 lower</b><br>(3.8 lower to 1.74 higher)                                     |
| <b>Gait speed – preferred (higher numbers indicate improvement)</b> |                      |             |             |                      |      |                     |     |     |   |   |                                                                                        |

**Table 1. Aerobic exercise compared to Usual care for Knee OA**

| Certainty assessment                                          |                      |             |             |                      |      |             | Summary of findings |    |   |   |                                                                                    |
|---------------------------------------------------------------|----------------------|-------------|-------------|----------------------|------|-------------|---------------------|----|---|---|------------------------------------------------------------------------------------|
| 28<br>(1 RCT)                                                 | serious <sup>a</sup> | not serious | not serious | serious <sup>c</sup> | none | ⊕⊕○○<br>LOW | 15                  | 13 | - | - | MD <b>8.7 higher</b><br>(3.06 higher to 14.34 higher)<br><br><b>Favors aerobic</b> |
| <b>Gait speed – max (higher numbers indicate improvement)</b> |                      |             |             |                      |      |             |                     |    |   |   |                                                                                    |
| 28<br>(1 RCT)                                                 | serious <sup>a</sup> | not serious | not serious | serious <sup>c</sup> | none | ⊕⊕○○<br>LOW | 15                  | 13 | - | - | MD <b>9.4 higher</b><br>(2.5 lower to 21.4 higher)                                 |

**CI:** Confidence interval; **SMD:** Standardized mean difference; **MD:** Mean difference

*Explanations*

- a. Participants not blinded, unclear if outcome assessors were blinded
- b. Wide CI that crosses line of no effect
- c. Single study, small sample size

**Table 2. Aerobic exercise + strength training compared to usual care for knee OA**

| Certainty assessment |  |               |              |             |                  |                   | Summary of findings    |  |                              |
|----------------------|--|---------------|--------------|-------------|------------------|-------------------|------------------------|--|------------------------------|
| Nº of participants   |  | Inconsistency | Indirectness | Imprecision | Publication bias | Overall certainty | Number of participants |  | Anticipated absolute effects |

**Table 2. Aerobic exercise + strength training compared to usual care for knee OA**

| Certainty assessment                                                                       |                      |             |             |                      |      |                  | Summary of findings                     |                                                          |                                |                                              |                                                                                                 |
|--------------------------------------------------------------------------------------------|----------------------|-------------|-------------|----------------------|------|------------------|-----------------------------------------|----------------------------------------------------------|--------------------------------|----------------------------------------------|-------------------------------------------------------------------------------------------------|
| (studies)<br>Follow-up                                                                     | Risk<br>of<br>bias   |             |             |                      |      | of<br>evidence   | With<br>usual<br>care for<br>knee<br>OA | With<br>Aerobic<br>exercise<br>+<br>strength<br>training | Relative<br>effect<br>(95% CI) | Risk<br>with<br>usual<br>care for<br>knee OA | Risk<br>difference<br>with<br>Aerobic<br>exercise +<br>strength<br>training                     |
| <b>Pain - 8-24 week intervention (lower scores indicate improvement)</b>                   |                      |             |             |                      |      |                  |                                         |                                                          |                                |                                              |                                                                                                 |
| 318<br>(4 RCTs)                                                                            | serious <sup>a</sup> | not serious | not serious | serious <sup>b</sup> | none | ⊕⊕○○<br>LOW      | 156                                     | 162                                                      | -                              | -                                            | SMD <b>0.37<br/>lower</b><br>(0.75 lower<br>to 0.01<br>higher)                                  |
| <b>Pain - 18 month intervention (lower scores indicate improvement)</b>                    |                      |             |             |                      |      |                  |                                         |                                                          |                                |                                              |                                                                                                 |
| 158<br>(1 RCT)                                                                             | serious <sup>a</sup> | not serious | not serious | serious <sup>b</sup> | none | ⊕⊕○○<br>LOW      | 78                                      | 80                                                       | -                              | -                                            | SMD <b>0.21<br/>higher</b><br>(0.11 lower<br>to 0.52<br>higher)                                 |
| <b>Pain - 3-month follow up (lower scores indicate improvement)</b>                        |                      |             |             |                      |      |                  |                                         |                                                          |                                |                                              |                                                                                                 |
| 107<br>(1 RCT)                                                                             | serious <sup>a</sup> | not serious | not serious | not serious          | none | ⊕⊕⊕○<br>MODERATE | 56                                      | 51                                                       | -                              | -                                            | SMD <b>0.76<br/>lower</b><br>(1.15 lower<br>to 0.37<br>lower)<br><br><b>Favors<br/>exercise</b> |
| <b>Self-reported function - 8-24 week intervention (lower scores indicate improvement)</b> |                      |             |             |                      |      |                  |                                         |                                                          |                                |                                              |                                                                                                 |

**Table 2. Aerobic exercise + strength training compared to usual care for knee OA**

| Certainty assessment                                                                      |                      |             |             |                      |      |             | Summary of findings |     |   |   |                                                       |
|-------------------------------------------------------------------------------------------|----------------------|-------------|-------------|----------------------|------|-------------|---------------------|-----|---|---|-------------------------------------------------------|
| 220<br>(4 RCTs)                                                                           | serious <sup>a</sup> | not serious | not serious | serious <sup>b</sup> | none | ⊕⊕○○<br>LOW | 104                 | 116 | - | - | SMD <b>0.3 lower</b><br>(0.82 lower to 0.22 higher)   |
| <b>Self-reported function - 18 month intervention (lower scores indicate improvement)</b> |                      |             |             |                      |      |             |                     |     |   |   |                                                       |
| 158<br>(1 RCT)                                                                            | serious <sup>a</sup> | not serious | not serious | serious <sup>b</sup> | none | ⊕⊕○○<br>LOW | 78                  | 80  | - | - | SMD <b>0.03 higher</b><br>(0.28 lower to 0.35 higher) |
| <b>Self-reported function - 3-6mo follow up (lower scores indicate improvement)</b>       |                      |             |             |                      |      |             |                     |     |   |   |                                                       |
| 133<br>(2 RCTs)                                                                           | serious <sup>a</sup> | not serious | not serious | serious <sup>b</sup> | none | ⊕⊕○○<br>LOW | 69                  | 64  | - | - | SMD <b>0.66 lower</b><br>(1.36 lower to 0.03 higher)  |
| <b>TUG - 20 week intervention (lower scores indicate improvement)</b>                     |                      |             |             |                      |      |             |                     |     |   |   |                                                       |
| 114<br>(1 RCT)                                                                            | serious <sup>a</sup> | not serious | not serious | serious <sup>b</sup> | none | ⊕⊕○○<br>LOW | 58                  | 56  | - | - | SMD <b>0.27 lower</b><br>(0.64 lower to 0.1 higher)   |
| <b>TUG - 3-month follow up (lower scores indicate improvement)</b>                        |                      |             |             |                      |      |             |                     |     |   |   |                                                       |

**Table 2. Aerobic exercise + strength training compared to usual care for knee OA**

| Certainty assessment                                                                  |                      |             |             |                      |      |                  | Summary of findings |    |   |   |                                                                                      |
|---------------------------------------------------------------------------------------|----------------------|-------------|-------------|----------------------|------|------------------|---------------------|----|---|---|--------------------------------------------------------------------------------------|
| 103<br>(1 RCT)                                                                        | serious <sup>a</sup> | not serious | not serious | not serious          | none | ⊕⊕⊕○<br>MODERATE | 55                  | 48 | - | - | SMD <b>0.41 lower</b><br>(0.8 lower to 0.02 lower)<br><br><b>Favors exercise</b>     |
| <b>6-min walk test - 20-24 week intervention (higher scores indicate improvement)</b> |                      |             |             |                      |      |                  |                     |    |   |   |                                                                                      |
| 140<br>(2 RCTs)                                                                       | serious <sup>a</sup> | not serious | not serious | serious <sup>b</sup> | none | ⊕⊕○○<br>LOW      | 71                  | 69 | - | - | MD <b>31.63 higher</b><br>(4.14 lower to 67.39 higher)                               |
| <b>6-min walk test - 18-month intervention (higher scores indicate improvement)</b>   |                      |             |             |                      |      |                  |                     |    |   |   |                                                                                      |
| 158<br>(1 RCT)                                                                        | serious <sup>a</sup> | not serious | not serious | not serious          | none | ⊕⊕⊕○<br>MODERATE | 78                  | 80 | - | - | MD <b>53.3 higher</b><br>(17.98 lower to 88.62 higher)<br><br><b>Favors exercise</b> |
| <b>6-min walk test - 3-6 month follow up (higher scores indicate improvement)</b>     |                      |             |             |                      |      |                  |                     |    |   |   |                                                                                      |

**Table 2. Aerobic exercise + strength training compared to usual care for knee OA**

| Certainty assessment                                                                   |                      |             |             |                      |      |                  | Summary of findings |    |   |   |                                                                                       |
|----------------------------------------------------------------------------------------|----------------------|-------------|-------------|----------------------|------|------------------|---------------------|----|---|---|---------------------------------------------------------------------------------------|
| 129<br>(2 RCTs)                                                                        | serious <sup>a</sup> | not serious | not serious | not serious          | none | ⊕⊕⊕○<br>MODERATE | 68                  | 61 | - | - | MD <b>43.35 higher</b><br>(7.77 higher to 78.93 higher)<br><br><b>Favors exercise</b> |
| <b>Chair stand – 8 wk intervention (higher scores indicate improvement)</b>            |                      |             |             |                      |      |                  |                     |    |   |   |                                                                                       |
| 51<br>(1 RCT)                                                                          | serious <sup>a</sup> | not serious | not serious | serious <sup>b</sup> | none | ⊕⊕○○<br>LOW      | 23                  | 28 | - | - | MD <b>1.4 higher</b><br>(2.07 lower to 4.87 higher)                                   |
| <b>Stair climbing time – 18 month intervention (lower scores indicate improvement)</b> |                      |             |             |                      |      |                  |                     |    |   |   |                                                                                       |
| 158<br>(1 RCT)                                                                         | serious <sup>a</sup> | not serious | not serious | serious <sup>b</sup> | none | ⊕⊕○○<br>LOW      | 78                  | 80 | - | - | MD <b>1.41 lower</b><br>(3.52 lower to 0.7 higher)                                    |
| <b>Stair ascent - 20 week intervention (lower scores indicate improvement)</b>         |                      |             |             |                      |      |                  |                     |    |   |   |                                                                                       |
| 113<br>(1 RCT)                                                                         | serious <sup>a</sup> | not serious | not serious | serious <sup>b</sup> | none | ⊕⊕○○<br>LOW      | 58                  | 55 | - | - | MD <b>1 lower</b><br>(2.6 lower to 0.6 higher)                                        |
| <b>Stair ascent - 3-month follow up (lower scores indicate improvement)</b>            |                      |             |             |                      |      |                  |                     |    |   |   |                                                                                       |

**Table 2. Aerobic exercise + strength training compared to usual care for knee OA**

| Certainty assessment                                                           |                      |             |             |                      |      |                  | Summary of findings |    |   |   |                                                                                        |
|--------------------------------------------------------------------------------|----------------------|-------------|-------------|----------------------|------|------------------|---------------------|----|---|---|----------------------------------------------------------------------------------------|
| 102<br>(1 RCT)                                                                 | serious <sup>a</sup> | not serious | not serious | serious <sup>b</sup> | none | ⊕⊕○○<br>LOW      | 55                  | 47 | - | - | MD <b>2.6 lower</b><br>(5.36 lower to 0.16 higher)                                     |
| <b>Stair descent - 8 week intervention (lower scores indicate improvement)</b> |                      |             |             |                      |      |                  |                     |    |   |   |                                                                                        |
| 113<br>(1 RCT)                                                                 | serious <sup>a</sup> | not serious | not serious | serious <sup>b</sup> | none | ⊕⊕○○<br>LOW      | 58                  | 55 | - | - | MD <b>1.5 lower</b><br>(3.33 lower to 0.33 higher)                                     |
| <b>Stair descent - 3-month follow up (lower scores indicate improvement)</b>   |                      |             |             |                      |      |                  |                     |    |   |   |                                                                                        |
| 102<br>(1 RCT)                                                                 | serious <sup>a</sup> | not serious | not serious | not serious          | none | ⊕⊕⊕○<br>MODERATE | 55                  | 47 | - | - | MD <b>2.1 lower</b><br>(3.79 lower to 0.41 lower)<br><br><b>Favors exercise</b>        |
| <b>5-min walk test 12-week intervention</b>                                    |                      |             |             |                      |      |                  |                     |    |   |   |                                                                                        |
| 124<br>(1 RCT)                                                                 | serious <sup>a</sup> | not serious | not serious | not serious          | none | ⊕⊕⊕○<br>MODERATE | 65                  | 59 | - | - | MD <b>42.19 higher</b><br>(14.19 higher to 70.19 higher)<br><br><b>Favors exercise</b> |

**Table 2. Aerobic exercise + strength training compared to usual care for knee OA**

| Certainty assessment                                                               |                      |             |             |                      |      | Summary of findings |    |    |   |   |                                                   |
|------------------------------------------------------------------------------------|----------------------|-------------|-------------|----------------------|------|---------------------|----|----|---|---|---------------------------------------------------|
| Gait speed - preferred - 8 weeks intervention (higher scores indicate improvement) |                      |             |             |                      |      |                     |    |    |   |   |                                                   |
| 51<br>(1 RCT)                                                                      | serious <sup>a</sup> | not serious | not serious | serious <sup>b</sup> | none | ⊕⊕○○<br>LOW         | 23 | 28 | - | - | MD <b>0.2 higher</b><br>(0.4 lower to 0.8 higher) |

CI: Confidence interval; SMD: Standardised mean difference; MD: Mean difference

**Explanations**

a. Participants not blinded. Some studies blinded outcome assessors, others did not report whether assessors were blinded

b. Wide CI that crosses line of no effect

**Table 3. RCT data not suitable for effect size calculation or combining with other data**

| Ref ID, Author, year | Study type                  | Duration                                   | Population Description                                                                                                                                                             | Treatment given to relevant population                                                                                                                                                                                                               | Results                                                                                                                                                                                                                                                                                                               |
|----------------------|-----------------------------|--------------------------------------------|------------------------------------------------------------------------------------------------------------------------------------------------------------------------------------|------------------------------------------------------------------------------------------------------------------------------------------------------------------------------------------------------------------------------------------------------|-----------------------------------------------------------------------------------------------------------------------------------------------------------------------------------------------------------------------------------------------------------------------------------------------------------------------|
| 4370, Dias, 2003     | RCT<br><br>Moderate quality | 12 weeks treatment with 6 months follow up | Knee OA (Altman 1986 criteria): 50 randomized, 47 completed<br><br>Exercise (n=24 completed, 84% female, age median 74)<br><br>Control (n=23 completes, 92% female, age median 76) | Both groups - initial education session<br><br>Exercise (2x/week exercise program including stretching, strengthening, and cool-down, and 3x/week 40 min walking program; all for 12 weeks)<br><br>Control (to follow advice from education session) | Median [no IQR available]<br><br><b>SF-36 Bodily pain</b><br><u>Exercise:</u><br>Baseline: 74<br>Post-treatment (12w): 100<br>Follow-up (6mo):100<br><br><u>Control:</u><br>Baseline:74<br>Post-treatment (12w): 64<br>Follow-up (6mo): 0<br><br><b>SF-36 Functional capacity</b><br><u>Exercise:</u><br>Baseline: 55 |



|  |  |  |  |  |                                                                                                                                              |
|--|--|--|--|--|----------------------------------------------------------------------------------------------------------------------------------------------|
|  |  |  |  |  | Post-treatment (12w): 72.5<br>Follow-up (6mo):77.5<br><br><u>Control:</u><br>Baseline: 45<br>Post-treatment (12w): 45<br>Follow-up (6mo): 40 |
|--|--|--|--|--|----------------------------------------------------------------------------------------------------------------------------------------------|

**Table 4. Aerobic exercise compared to Usual care for Hip OA**

| <b>Table 4. Aerobic exercise compared to Usual care for Hip OA</b>   |                      |                      |                     |                      |                         |                                      |                                   |                              |                                 |                                        |                                                      |
|----------------------------------------------------------------------|----------------------|----------------------|---------------------|----------------------|-------------------------|--------------------------------------|-----------------------------------|------------------------------|---------------------------------|----------------------------------------|------------------------------------------------------|
| <b>Certainty assessment</b>                                          |                      |                      |                     |                      |                         |                                      | <b>Summary of findings</b>        |                              |                                 |                                        |                                                      |
| <b>Nº of participants (studies) Follow-up</b>                        | <b>Risk of bias</b>  | <b>Inconsistency</b> | <b>Indirectness</b> | <b>Imprecision</b>   | <b>Publication bias</b> | <b>Overall certainty of evidence</b> | <b>Number of participants</b>     |                              | <b>Relative effect (95% CI)</b> | <b>Anticipated absolute effects</b>    |                                                      |
|                                                                      |                      |                      |                     |                      |                         |                                      | <b>With Usual care for Hip OA</b> | <b>With Aerobic exercise</b> |                                 | <b>Risk with Usual care for Hip OA</b> | <b>Risk difference with Aerobic exercise</b>         |
| <b>Pain (lower scores indicate improvement)</b>                      |                      |                      |                     |                      |                         |                                      |                                   |                              |                                 |                                        |                                                      |
| 203 (1 RCT)                                                          | serious <sup>a</sup> | not serious          | not serious         | serious <sup>b</sup> | none                    | ⊕⊕○○<br>LOW                          | 102                               | 101                          | -                               | -                                      | SMD <b>0.24 lower</b><br>(0.52 lower to 0.04 higher) |
| <b>Pain - mid-term follow up (lower scores indicate improvement)</b> |                      |                      |                     |                      |                         |                                      |                                   |                              |                                 |                                        |                                                      |

**Table 4. Aerobic exercise compared to Usual care for Hip OA**

| Certainty assessment                                                                   |                      |             |             |                      |      |                  | Summary of findings |     |   |   |                                                                                  |
|----------------------------------------------------------------------------------------|----------------------|-------------|-------------|----------------------|------|------------------|---------------------|-----|---|---|----------------------------------------------------------------------------------|
| 203<br>(1 RCT)                                                                         | serious <sup>a</sup> | not serious | not serious | serious <sup>b</sup> | none | ⊕⊕○○<br>LOW      | 102                 | 101 | - | - | SMD <b>0.15 lower</b><br>(0.43 lower to 0.12 higher)                             |
| <b>Self-reported function (lower scores indicate improvement)</b>                      |                      |             |             |                      |      |                  |                     |     |   |   |                                                                                  |
| 203<br>(1 RCT)                                                                         | serious <sup>a</sup> | not serious | not serious | not serious          | none | ⊕⊕⊕○<br>MODERATE | 102                 | 101 | - | - | SMD <b>0.34 lower</b><br>(0.62 lower to 0.06 lower)<br><br><b>Favors aerobic</b> |
| <b>Self-reported function – mid-term follow up (lower scores indicate improvement)</b> |                      |             |             |                      |      |                  |                     |     |   |   |                                                                                  |
| 203<br>(1 RCT)                                                                         | serious <sup>a</sup> | not serious | not serious | not serious          | none | ⊕⊕⊕○<br>MODERATE | 102                 | 101 | - | - | SMD <b>0.35 lower</b><br>(0.62 lower to 0.07 lower)<br><br><b>Favors aerobic</b> |
| <b>TUG – mid-term follow up (lower scores indicate improvement)</b>                    |                      |             |             |                      |      |                  |                     |     |   |   |                                                                                  |

**Table 4. Aerobic exercise compared to Usual care for Hip OA**

| Certainty assessment |                      |             |             |             |      |                  | Summary of findings |     |   |   |                                                                                 |
|----------------------|----------------------|-------------|-------------|-------------|------|------------------|---------------------|-----|---|---|---------------------------------------------------------------------------------|
| 203<br>(1 RCT)       | serious <sup>a</sup> | not serious | not serious | not serious | none | ⊕⊕⊕○<br>MODERATE | 102                 | 101 | - | - | SMD <b>0.3 lower</b><br>(0.57 lower to 0.02 lower)<br><br><b>Favors aerobic</b> |

CI: Confidence interval; SMD: Standardised mean difference

**Explanations**

- a. Participants not blinded; unclear if assessors blinded
- b. Wide CI that crosses line of no effect

**References**

1. Samut G, Dincer F, Ozdemir O. The effect of isokinetic and aerobic exercises on serum interleukin-6 and tumor necrosis factor alpha levels, pain, and functional activity in patients with knee osteoarthritis. *Mod Rheumatol.* 2015;25(6):919-924.
2. Salacinski AJ, Krohn K, Lewis SF, Holland ML, Ireland K, Marchetti G. The effects of group cycling on gait and pain-related disability in individuals with mild-to-moderate knee osteoarthritis: a randomized controlled trial. *J Orthop Sports Phys Ther.* 2012;42(12):985-995.
3. Kovar PA, Allegrante JP, MacKenzie CR, Peterson MG, Gutin B, Charlson ME. Supervised fitness walking in patients with osteoarthritis of the knee. A randomized, controlled trial. *Ann Intern Med.* 1992;116(7):529-534.
4. Brosseau L, Wells GA, Kenny GP, Reid R, Maetzel A, Tugwell P, et al. The implementation of a community-based aerobic walking program for mild to moderate knee osteoarthritis: a knowledge translation randomized controlled trial: part II: clinical outcomes. *BMC Public Health.* 2012;12:1073.
5. Sullivan T, Allegrante JP, Peterson MG, Kovar PA, MacKenzie CR. One-year followup of patients with osteoarthritis of the knee who participated in a program of supervised fitness walking and supportive patient education. *Arthritis Care Res.* 1998;11(4):228-233.
6. Ettinger WH, Jr., Burns R, Messier SP, Applegate W, Rejeski WJ, Morgan T, et al. A randomized trial comparing aerobic exercise and resistance exercise with a health education program in older adults with knee osteoarthritis. The Fitness Arthritis and Seniors Trial (FAST). *JAMA.* 1997;277(1):25-31.

7. de Rooij M, van der Leeden M, Cheung J, van der Esch M, Hakkinen A, Haverkamp D, et al. Efficacy of Tailored Exercise Therapy on Physical Functioning in Patients With Knee Osteoarthritis and Comorbidity: A Randomized Controlled Trial. *Arthritis Care Res (Hoboken)*. 2017;69(6):807-816.
8. Peloquin L, Bravo G, Gauthier P, Lacombe G, Billiard JS. Effects of a cross-training exercise program in persons with osteoarthritis of the knee a randomized controlled trial. *J Clin Rheumatol*. 1999;5(3):126-136.
9. Cheung C, Wyman JF, Bronas U, McCarthy T, Rudser K, Mathiason MA. Managing knee osteoarthritis with yoga or aerobic/strengthening exercise programs in older adults: a pilot randomized controlled trial. *Rheumatol Int*. 2017;37(3):389-398.
10. Messier SP, Loeser RF, Miller GD, Morgan TM, Rejeski WJ, Sevick MA, et al. Exercise and dietary weight loss in overweight and obese older adults with knee osteoarthritis: the Arthritis, Diet, and Activity Promotion Trial. *Arthritis Rheum*. 2004;50(5):1501-1510.
11. Aglamis B, Toraman NF, Yaman H. Change of quality of life due to exercise training in knee osteoarthritis: SF-36 and WOMAC. *J Back Musculoskelet Rehabil*. 2009;22(1):43-45, 47-48, 46.
12. Schlenk EA, Lias JL, Sereika SM, Dunbar-Jacob J, Kwok CK. Improving physical activity and function in overweight and obese older adults with osteoarthritis of the knee: a feasibility study. *Rehabil Nurs*. 2011;36(1):32-42.
13. Dias RC, Dias JM, Ramos LR. Impact of an exercise and walking protocol on quality of life for elderly people with OA of the knee. *Physiother Res Int*. 2003;8(3):121-130.
14. Multanen J, Nieminen M, Hakkinen A, Kujala U, Jamsa T, Kautiainen H et al. Effects of High - Impact Training on Bone and Articular Cartilage: 12 - Month Randomized Controlled Quantitative MRI Study. *JBMR* 2014;29:192-201.
15. Minor MA, Hewett JE, Webel RR, Anderson SK, Kay DR. Efficacy of physical conditioning exercise in patients with rheumatoid arthritis and osteoarthritis. *Arth Rheum* 1989;32(11):1396-1404.
16. Wallis JA, Webster KE, Levinger P, Singh PJ, Fong C, Taylor NF. A walking program for people with severe knee osteoarthritis did not reduce pain but may have benefits for cardiovascular health: a phase II randomised controlled trial. *Osteoarthritis Cartilage* 2017;25:1969-79.
17. Teirlinck CH, Luijsterburg PA, Dekker J, Bohnen AM, Verhaar JA, Koopmanschap MA, et al. Effectiveness of exercise therapy added to general practitioner care in patients with hip osteoarthritis: a pragmatic randomized controlled trial. *Osteoarthritis Cartilage*. 2016;24(1):82-90.
18. Kucuk EB, Taskuran OO, Tokgoz N, Meray J. Effects of isokinetic, isometric, and aerobic exercises on clinical variables and knee cartilage volume using magnetic resonance imaging in patients with osteoarthritis. *Turk J Phys Med Rehab* 2018;64(1):8-16.
19. Braghin RMB, Libardi EC, Junqueira C, Nogueira-Barbosa MH, de Abreu DCC. Exercise on balance and function for knee osteoarthritis: A randomized controlled trial. *J Bodyw Mov Ther*. 2018 Jan;22(1):76-82.

## **PICO 2: Strength training plus usual care compared to usual care for Knee or Hip OA**

Summary. The literature searches identified 24 RCTs that compared strength or resistance training to usual care in patients with hip or knee OA (Table 1). Pain: Multiple RCTs compared either strength training<sup>1-5</sup> or resistance training<sup>6-10</sup> with usual care or sham exercise reported lower pain level in the exercise intervention group measured by WOMAC pain subscale. Similar significant and precise results were reported with strength training exercise vs usual care when VAS pain scale was used to measure pain post intervention.<sup>11-14</sup> Similar lower level of pain on NRS pain scale and improvement in pain post intervention was reported in 3 RCTs, one with combined balance plus strength training intervention<sup>15</sup>, other with strength plus ultrasound<sup>16</sup> and third with strength training plus flexibility<sup>17</sup> (vs control). Significant improvement was noted in change in pain level from baseline with strength<sup>2,18-21</sup> or resistance<sup>22</sup> training exercises as measured by WOMAC<sup>2,18-20,22</sup> and VAS<sup>21,23</sup> pain scales. One study of strength training did not find significant lowering of pain with strengthening exercise as measured by SF-36.<sup>24</sup>

Function: For self-reported function, multiple RCTs comparing either strength<sup>1-4,15,17</sup> or resistance<sup>6-8</sup> or combined<sup>25</sup> training to usual care/sham exercise, reported significantly lower or improvement in pain level using WOMAC pain subscale with exercise intervention compared to usual care. One study reported better functional level with exercise intervention using Lequesne Functional Index,<sup>11</sup> while another study failed to demonstrate a significant result using the SF36 scale.<sup>24</sup> For performance-based function, significant improvement in Timed Up and Go from baseline post exercise intervention was reported after resistance training by 1 RCT<sup>22</sup> but other RCTs could not demonstrate any benefit for timed Up and Go post treatment,<sup>7,13,26</sup> 6-minute walk time<sup>6,7,26-28</sup> or stride velocity<sup>28</sup> with exercise intervention.

Neuromuscular electrical stimulation (NMES) is the use of electrical stimulation to elicit muscle contractions. It is used to restore muscle activation or to improve strength. Five RCTs assessed pain and function outcomes with NMES compared to usual care (Table 2). The results varied somewhat by study design and scale used to measure outcomes. Two RCTs comparing NMES vs usual care did not find any improvement in pain, one used WOMAC pain scale<sup>6</sup> and the other used Arthritis Impact Measurement Scale post intervention between groups.<sup>29</sup> The same study did not find a significant difference between groups with respect to self-report function (WOMAC function at 14 week follow up) or performance-based (walk time in secs) function.<sup>6</sup> Two RCTs that combined exercise plus NMES intervention (one compared to education,<sup>30</sup> the other compared to exercise alone<sup>31</sup>) found significant improvement in pain, despite using different pain scales (NRS pain scale<sup>30</sup> and VAS pain scale<sup>31</sup> respectively). Neither study found a significant difference in performance-based physical function measured by Timed Up and Go.<sup>30,31</sup> In contrast, another RCT of NMES vs usual care found greater improvement (change) in WOMAC pain and function with NMES compared to controls.<sup>32</sup> None of these studies reported data concerning adverse events.

A literature search update in August 2018 identified two additional RCTs that addressed this comparison.<sup>33,34</sup> Neither study's results altered the findings in the tables below.

Quality of evidence across all critical outcomes: Moderate

**Table 1: Strength training compared to usual care for Knee or Hip OA**

| Certainty assessment                                                |                      |               |              |             |                  |                               | Summary of findings    |                            |                          |                              |                                                                                            |
|---------------------------------------------------------------------|----------------------|---------------|--------------|-------------|------------------|-------------------------------|------------------------|----------------------------|--------------------------|------------------------------|--------------------------------------------------------------------------------------------|
| № of participants (studies) Follow-up                               | Risk of bias         | Inconsistency | Indirectness | Imprecision | Publication bias | Overall certainty of evidence | Number of participants |                            | Relative effect (95% CI) | Anticipated absolute effects |                                                                                            |
|                                                                     |                      |               |              |             |                  |                               | Controls               | With Exercise intervention |                          | Pain and function outcomes   | Risk with placebo                                                                          |
| <b>WOMAC pain (mean post) (lower scores indicate improvement)</b>   |                      |               |              |             |                  |                               |                        |                            |                          |                              |                                                                                            |
| 753 (11 RCTs)                                                       | serious <sup>a</sup> | not serious   | not serious  | not serious | none             | ⊕⊕⊕○<br>MODERATE              | 371                    | 382                        | -                        | -                            | SMD <b>0.47 lower</b><br>(0.71 lower to 0.24 lower)<br><br><b>Favors strength training</b> |
| <b>WOMAC pain (mean change) (lower scores indicate improvement)</b> |                      |               |              |             |                  |                               |                        |                            |                          |                              |                                                                                            |
| 464 (5 RCTs)                                                        | serious <sup>a</sup> | not serious   | not serious  | not serious | none             | ⊕⊕⊕○<br>MODERATE              | 210                    | 254                        | -                        | -                            | SMD <b>1.41 lower</b><br>(2.33 lower to 0.49 lower)<br><br><b>Favors strength training</b> |
| <b>VAS (0-10, mean) (lower scores indicate improvement)</b>         |                      |               |              |             |                  |                               |                        |                            |                          |                              |                                                                                            |
| 409 (4 RCTs)                                                        | serious <sup>a</sup> | not serious   | not serious  | not serious | none             | ⊕⊕⊕○<br>MODERATE              | 205                    | 204                        | -                        | -                            | MD <b>2.19 lower</b><br>(3.4 lower to 0.97 lower)<br><br><b>Favors strength training</b>   |

**Table 1: Strength training compared to usual care for Knee or Hip OA**

| Certainty assessment                                                           |                      |             |             |                      |      | Summary of findings |     |     |   |   |                                                                                           |
|--------------------------------------------------------------------------------|----------------------|-------------|-------------|----------------------|------|---------------------|-----|-----|---|---|-------------------------------------------------------------------------------------------|
| <b>VAS pain (0-10, mean change post) (lower scores indicate improvement)</b>   |                      |             |             |                      |      |                     |     |     |   |   |                                                                                           |
| 1601<br>(2 RCTs)                                                               | serious <sup>a</sup> | not serious | not serious | not serious          | none | ⊕⊕⊕○<br>MODERATE    | 816 | 785 | - | - | MD <b>0.79 lower</b><br>(1.35 lower to 0.23 lower)<br><br><b>Favors strength training</b> |
| <b>SF 36 pain (mean, post) (lower scores indicate improvement)</b>             |                      |             |             |                      |      |                     |     |     |   |   |                                                                                           |
| 81<br>(1 RCT)                                                                  | serious <sup>a</sup> | not serious | not serious | serious <sup>b</sup> | none | ⊕⊕○○<br>LOW         | 38  | 43  | - | - | MD <b>2.98 higher</b><br>(7.98 lower to 13.94 higher)                                     |
| <b>NRS pain (mean, post) (lower scores indicate improvement)</b>               |                      |             |             |                      |      |                     |     |     |   |   |                                                                                           |
| 78<br>(2 RCTs)                                                                 | serious <sup>a</sup> | not serious | not serious | not serious          | none | ⊕⊕⊕○<br>MODERATE    | 40  | 38  | - | - | MD <b>2.56 lower</b><br>(3.69 lower to 1.43 lower)<br><br><b>Favors strength training</b> |
| <b>NRS pain with activity (mean, post) (lower scores indicate improvement)</b> |                      |             |             |                      |      |                     |     |     |   |   |                                                                                           |
| 88<br>(1 RCT)                                                                  | serious <sup>a</sup> | not serious | not serious | not serious          | none | ⊕⊕⊕○<br>MODERATE    | 43  | 45  | - | - | MD <b>1.6 lower</b><br>(2.8 lower to 0.4 lower)<br><br><b>Favors strength training</b>    |

**Table 1: Strength training compared to usual care for Knee or Hip OA**

| Certainty assessment                                                              |                      |             |             |                      |      | Summary of findings |     |      |   |   |                                                                                            |
|-----------------------------------------------------------------------------------|----------------------|-------------|-------------|----------------------|------|---------------------|-----|------|---|---|--------------------------------------------------------------------------------------------|
| <b>Lequesne Functional Index (mean, post) (lower scores indicate improvement)</b> |                      |             |             |                      |      |                     |     |      |   |   |                                                                                            |
| 55<br>(1 RCT)                                                                     | serious <sup>a</sup> | not serious | not serious | not serious          | none | ⊕⊕⊕○<br>MODERATE    | 27  | 28   | - | - | MD <b>4.5 lower</b><br>(5.32 lower to 3.68 lower)<br><br><b>Favors strength training</b>   |
| <b>WOMAC function (mean, post) (lower scores indicate improvement)</b>            |                      |             |             |                      |      |                     |     |      |   |   |                                                                                            |
| 653<br>(11 RCTs)                                                                  | serious <sup>a</sup> | not serious | not serious | not serious          | none | ⊕⊕⊕○<br>MODERATE    | 320 | 333  | - | - | SMD <b>0.53 lower</b><br>(0.77 lower to 0.29 lower)<br><br><b>Favors strength training</b> |
| <b>WOMAC function (mean change) (lower scores indicate improvement)</b>           |                      |             |             |                      |      |                     |     |      |   |   |                                                                                            |
| 2001<br>(7 RCTs)                                                                  | serious <sup>a</sup> | not serious | not serious | not serious          | none | ⊕⊕⊕○<br>MODERATE    | 991 | 1010 | - | - | SMD <b>1.43 lower</b><br>(2.14 lower to 0.71 lower)<br><br><b>Favors strength training</b> |
| <b>SF 36 function (mean, post) (lower scores indicate improvement)</b>            |                      |             |             |                      |      |                     |     |      |   |   |                                                                                            |
| 81<br>(1 RCT)                                                                     | serious <sup>a</sup> | not serious | not serious | serious <sup>b</sup> | none | ⊕⊕○○<br>LOW         | 38  | 43   | - | - | MD <b>7.83 higher</b><br>(3.26 lower to 18.92 higher)                                      |



**Table 1: Strength training compared to usual care for Knee or Hip OA**

| Certainty assessment                                                        |                      |                      |             |                      |      | Summary of findings |    |    |   |   |                                                                                          |
|-----------------------------------------------------------------------------|----------------------|----------------------|-------------|----------------------|------|---------------------|----|----|---|---|------------------------------------------------------------------------------------------|
| <b>6 minute walk test (higher scores indicate improvement)</b>              |                      |                      |             |                      |      |                     |    |    |   |   |                                                                                          |
| 89<br>(5 RCTs)                                                              | serious <sup>a</sup> | serious <sup>b</sup> | not serious | serious <sup>b</sup> | none | ⊕○○○<br>VERY LOW    | 39 | 50 | - | - | MD <b>16.38 higher</b><br>(20.96 lower to 53.71 higher)                                  |
| <b>Timed up and go (mean, post) (lower scores indicate improvement)</b>     |                      |                      |             |                      |      |                     |    |    |   |   |                                                                                          |
| 126<br>(3 RCTs)                                                             | serious <sup>a</sup> | not serious          | not serious | serious <sup>b</sup> | none | ⊕⊕○○<br>LOW         | 62 | 64 | - | - | MD <b>0.35 lower</b><br>(1.17 lower to 0.47 higher)                                      |
| <b>Timed up and go (mean, change) (lower scores indicate improvement)</b>   |                      |                      |             |                      |      |                     |    |    |   |   |                                                                                          |
| 41<br>(1 RCT)                                                               | serious <sup>a</sup> | not serious          | not serious | not serious          | none | ⊕⊕⊕○<br>MODERATE    | 17 | 24 | - | - | MD <b>1.3 lower</b><br>(1.98 lower to 0.62 lower)<br><br><b>Favors strength training</b> |
| <b>stride velocity m/s (mean post) (higher scores indicate improvement)</b> |                      |                      |             |                      |      |                     |    |    |   |   |                                                                                          |
| 31<br>(1 RCT)                                                               | serious <sup>a</sup> | not serious          | not serious | serious <sup>c</sup> | none | ⊕⊕○○<br>LOW         | 16 | 15 | - | - | MD <b>0.01 lower</b><br>(0.13 lower to 0.11 higher)                                      |

**CI:** Confidence interval; **MD:** Mean difference

*Explanations*

a. Participants were not blinded; some studies did blind outcome assessors

b. Wide CI crosses line of significance

c. Small sample size

**Table 2: NMES pain and function outcomes compared to placebo for Knee or Hip**

| Certainty assessment                                                            |                      |               |              |                      |                  |                               | Summary of findings    |                                      |                          |                              |                                                                             |
|---------------------------------------------------------------------------------|----------------------|---------------|--------------|----------------------|------------------|-------------------------------|------------------------|--------------------------------------|--------------------------|------------------------------|-----------------------------------------------------------------------------|
| № of participants (studies)<br>Follow-up                                        | Risk of bias         | Inconsistency | Indirectness | Imprecision          | Publication bias | Overall certainty of evidence | Number of participants |                                      | Relative effect (95% CI) | Anticipated absolute effects |                                                                             |
|                                                                                 |                      |               |              |                      |                  |                               | Controls               | With NMES pain and function outcomes |                          | Risk with placebo            | Risk difference with NMES pain and function outcomes                        |
| <b>WOMAC pain (0-20, mean, post) (lower scores indicate improvement)</b>        |                      |               |              |                      |                  |                               |                        |                                      |                          |                              |                                                                             |
| 53<br>(2 RCTs)                                                                  | serious <sup>a</sup> | not serious   | not serious  | serious <sup>b</sup> | none             | ⊕⊕○○<br>LOW                   | 25                     | 28                                   | -                        | -                            | MD <b>0.3 lower</b><br>(3.48 lower to 2.88 higher)                          |
| <b>VAS pain (0-10, mean, post) (lower scores indicate improvement)</b>          |                      |               |              |                      |                  |                               |                        |                                      |                          |                              |                                                                             |
| 50<br>(1 RCT)                                                                   | serious <sup>a</sup> | not serious   | not serious  | not serious          | none             | ⊕⊕⊕○<br>MODERATE              | 25                     | 25                                   | -                        | -                            | MD <b>1.7 lower</b><br>(2.98 lower to 0.42 lower)<br><br><b>Favors NMES</b> |
| <b>WOMAC pain (0-20, mean change, post) (lower scores indicate improvement)</b> |                      |               |              |                      |                  |                               |                        |                                      |                          |                              |                                                                             |

**Table 2: NMES pain and function outcomes compared to placebo for Knee or Hip**

| Certainty assessment                                                                         |                      |             |             |                      |      |                  | Summary of findings |    |   |   |                                                                              |
|----------------------------------------------------------------------------------------------|----------------------|-------------|-------------|----------------------|------|------------------|---------------------|----|---|---|------------------------------------------------------------------------------|
| 30<br>(1 RCT)                                                                                | serious <sup>a</sup> | not serious | not serious | not serious          | none | ⊕⊕⊕○<br>MODERATE | 14                  | 16 | - | - | MD <b>1.94 lower</b><br>(3.86 lower to 0.02 lower)<br><br><b>Favors NMES</b> |
| <b>Arthritis Impact Measurement Scale 2–Pain Subscale(lower scores indicate improvement)</b> |                      |             |             |                      |      |                  |                     |    |   |   |                                                                              |
| 38<br>(1 RCT)                                                                                | serious <sup>a</sup> | not serious | not serious | serious <sup>b</sup> | none | ⊕⊕○○<br>LOW      | 18                  | 20 | - | - | MD <b>0.81 lower</b><br>(2.25 lower to 0.63 higher)                          |
| <b>NRS pain (mean, post) (lower scores indicate improvement)</b>                             |                      |             |             |                      |      |                  |                     |    |   |   |                                                                              |
| 100<br>(1 RCT)                                                                               | serious <sup>a</sup> | not serious | not serious | not serious          | none | ⊕⊕⊕○<br>MODERATE | 50                  | 50 | - | - | MD <b>1.44 lower</b><br>(2.65 lower to 0.23 lower)<br><br><b>Favors NMES</b> |
| <b>WOMAC function (0-68, mean, post) (lower scores indicate improvement)</b>                 |                      |             |             |                      |      |                  |                     |    |   |   |                                                                              |

**Table 2: NMES pain and function outcomes compared to placebo for Knee or Hip**

| Certainty assessment                                                                  |                      |             |             |                      |      |                  | Summary of findings |    |   |   |                                                                               |
|---------------------------------------------------------------------------------------|----------------------|-------------|-------------|----------------------|------|------------------|---------------------|----|---|---|-------------------------------------------------------------------------------|
| 53<br>(2 RCTs)                                                                        | serious <sup>a</sup> | not serious | not serious | serious <sup>b</sup> | none | ⊕⊕○○<br>LOW      | 25                  | 28 | - | - | MD <b>1.16 higher</b><br>(17.81 lower to 20.12 higher)                        |
| <b>WOMAC disability (0-68, mean change, post) (lower scores indicate improvement)</b> |                      |             |             |                      |      |                  |                     |    |   |   |                                                                               |
| 30<br>(1 RCT)                                                                         | serious <sup>a</sup> | not serious | not serious | not serious          | none | ⊕⊕⊕○<br>MODERATE | 14                  | 16 | - | - | MD <b>9.92 lower</b><br>(16.71 lower to 3.13 lower)<br><br><b>Favors NMES</b> |
| <b>Timed get up and go (mean, post) (lower scores indicate improvement)</b>           |                      |             |             |                      |      |                  |                     |    |   |   |                                                                               |
| 150<br>(2 RCTs)                                                                       | serious <sup>a</sup> | not serious | not serious | serious <sup>b</sup> | none | ⊕⊕○○<br>LOW      | 75                  | 75 | - | - | MD <b>1.24 lower</b><br>(3.83 lower to 1.35 higher)                           |
| <b>Walk time in secs (mean, post)</b>                                                 |                      |             |             |                      |      |                  |                     |    |   |   |                                                                               |

**Table 2: NMES pain and function outcomes compared to placebo for Knee or Hip**

| Certainty assessment |                      |             |             |                      |      | Summary of findings |   |    |   |   |                                                      |
|----------------------|----------------------|-------------|-------------|----------------------|------|---------------------|---|----|---|---|------------------------------------------------------|
| 16<br>(1 RCT)        | serious <sup>a</sup> | not serious | not serious | serious <sup>b</sup> | none | ⊕⊕○○<br>LOW         | 6 | 10 | - | - | MD <b>1.53 higher</b><br>(2.61 lower to 5.67 higher) |

CI: Confidence interval; MD: Mean difference

**Explanations**

a Participants not blinded; most studies had blind outcome assessors

b. Wide CI crossing line of significance

**References**

1. Foley A, Halbert J, Hewitt T, Crotty M. Does hydrotherapy improve strength and physical function in patients with osteoarthritis--a randomised controlled trial comparing a gym based and a hydrotherapy based strengthening programme. *Ann Rheum Dis* 2003;62:1162-7.
2. Lim BW, Hinman RS, Wrigley TV, Sharma L, Bennell KL. Does knee malalignment mediate the effects of quadriceps strengthening on knee adduction moment, pain, and function in medial knee osteoarthritis? A randomized controlled trial. *Arthritis Rheum* 2008;59:943-51.
3. Lin DH, Lin CH, Lin YF, Jan MH. Efficacy of 2 non-weight-bearing interventions, proprioception training versus strength training, for patients with knee osteoarthritis: a randomized clinical trial. *J Orthop Sports Phys Ther* 2009;39:450-7.
4. Oliveira AM, Peccin MS, Silva KN, Teixeira LE, Trevisani VF. Impact of exercise on the functional capacity and pain of patients with knee osteoarthritis: a randomized clinical trial. *Rev Bras Reumatol* 2012;52:876-82.
5. Sayers SP, Gibson K, Cook CR. Effect of high-speed power training on muscle performance, function, and pain in older adults with knee osteoarthritis: a pilot investigation. *Arthritis Care Res (Hoboken)* 2012;64:46-53.
6. Bruce-Brand RA, Walls RJ, Ong JC, Emerson BS, O'Byrne JM, Moyna NM. Effects of home-based resistance training and neuromuscular electrical stimulation in knee osteoarthritis: a randomized controlled trial. *BMC Musculoskelet Disord* 2012;13:118.
7. Wortley M, Zhang S, Paquette M, et al. Effects of resistance and Tai Ji training on mobility and symptoms in knee osteoarthritis patients. *Journal of Sports and Health Science* 2013;2:209-14.
8. Rogers MW, Tamulevicius N, Semple SJ, Krkeljas Z. Efficacy of home-based kinesthesia, balance & agility exercise training among persons with symptomatic knee osteoarthritis. *J Sports Sci Med* 2012;11:751-8.

9. Petrella RJ, Bartha C. Home based exercise therapy for older patients with knee osteoarthritis: a randomized clinical trial. *J Rheumatol* 2000;27:2215-21.
10. Foroughi N, Smith RM, Lange AK, Baker MK, Fiatarone Singh MA, Vanwanseele B. Lower limb muscle strengthening does not change frontal plane moments in women with knee osteoarthritis: A randomized controlled trial. *Clin Biomech (Bristol, Avon)* 2011;26:167-74.
11. Huang MH, Lin YS, Yang RC, Lee CL. A comparison of various therapeutic exercises on the functional status of patients with knee osteoarthritis. *Semin Arthritis Rheum* 2003;32:398-406.
12. Huang MH, Yang RC, Lee CL, Chen TW, Wang MC. Preliminary results of integrated therapy for patients with knee osteoarthritis. *Arthritis Rheum* 2005;53:812-20.
13. Tak E, Staats P, Van Hespden A, Hopman-Rock M. The effects of an exercise program for older adults with osteoarthritis of the hip. *J Rheumatol* 2005;32:1106-13.
14. Doi T, Akai M, Fujino K, et al. Effect of home exercise of quadriceps on knee osteoarthritis compared with nonsteroidal antiinflammatory drugs: a randomized controlled trial. *Am J Phys Med Rehabil* 2008;87:258-69.
15. Takacs J, Krowchuk NM, Garland SJ, Carpenter MG, Hunt MA. Dynamic Balance Training Improves Physical Function in Individuals With Knee Osteoarthritis: A Pilot Randomized Controlled Trial. *Arch Phys Med Rehabil* 2017;98:1586-93.
16. Anwer S, Alghadir A. Effect of isometric quadriceps exercise on muscle strength, pain, and function in patients with knee osteoarthritis: a randomized controlled study. *J Phys Ther Sci* 2014;26:745-8.
17. French HP, Cusack T, Brennan A, et al. Exercise and manual physiotherapy arthritis research trial (EMPART) for osteoarthritis of the hip: a multicenter randomized controlled trial. *Arch Phys Med Rehabil* 2013;94:302-14.
18. Baker KR, Nelson ME, Felson DT, Layne JE, Sarno R, Roubenoff R. The efficacy of home based progressive strength training in older adults with knee osteoarthritis: a randomized controlled trial. *J Rheumatol* 2001;28:1655-65.
19. Krauss I, Steinhilber B, Haupt G, Miller R, Martus P, Janssen P. Exercise therapy in hip osteoarthritis--a randomized controlled trial. *Dtsch Arztebl Int* 2014;111:592-9.
20. O'Reilly SC, Muir KR, Doherty M. Effectiveness of home exercise on pain and disability from osteoarthritis of the knee: a randomised controlled trial. *Ann Rheum Dis* 1999;58:15-9.
21. Huang MH, Lin YS, Lee CL, Yang RC. Use of ultrasound to increase effectiveness of isokinetic exercise for knee osteoarthritis. *Arch Phys Med Rehabil* 2005;86:1545-51.
22. Chang TF, Liou TH, Chen CH, Huang YC, Chang KH. Effects of elastic-band exercise on lower-extremity function among female patients with osteoarthritis of the knee. *Disabil Rehabil* 2012;34:1727-35.
23. Ravaud P, Giraudeau B, Logeart I, et al. Management of osteoarthritis (OA) with an unsupervised home based exercise programme and/or patient administered assessment tools. A cluster randomised controlled trial with a 2x2 factorial design. *Ann Rheum Dis* 2004;63:703-8.
24. Imoto AM, Peccin MS, Trevisani VF. Quadriceps strengthening exercises are effective in improving pain, function and quality of life in patients with osteoarthritis of the knee. *Acta Orthop Bras* 2012;20:174-9.
25. Juhakoski R, Tenhonen S, Malmivaara A, Kiviniemi V, Anttonen T, Arokoski JP. A pragmatic randomized controlled study of the effectiveness and cost consequences of exercise therapy in hip osteoarthritis. *Clin Rehabil* 2011;25:370-83.

26. Chopp-Hurley JN, Brenneman EC, Wiebenga EG, Bulbrook B, Keir PJ, Maly MR. Randomized Controlled Trial Investigating the Role of Exercise in the Workplace to Improve Work Ability, Performance, and Patient-Reported Symptoms Among Older Workers With Osteoarthritis. *J Occup Environ Med* 2017;59:550-6.
27. Singh S, Pattnaik M, Mohanty P, Ganesh GS. Effectiveness of hip abductor strengthening on health status, strength, endurance and six minute walk test in participants with medial compartment symptomatic knee osteoarthritis. *J Back Musculoskelet Rehabil* 2016;29:65-75.
28. Cheing GL, Hui-Chan CW. Would the addition of TENS to exercise training produce better physical performance outcomes in people with knee osteoarthritis than either intervention alone? *Clin Rehabil* 2004;18:487-97.
29. Gaines JM, Metter EJ, Talbot LA. The effect of neuromuscular electrical stimulation on arthritis knee pain in older adults with osteoarthritis of the knee. *Appl Nurs Res* 2004;17:201-6.
30. Imoto AM, Peccin MS, Teixeira LE, Silva KN, Abrahao M, Trevisani VF. Is neuromuscular electrical stimulation effective for improving pain, function and activities of daily living of knee osteoarthritis patients? A randomized clinical trial. *Sao Paulo Med J* 2013;131:80-7.
31. Elboim-Gabyzon M, Rozen N, Laufer Y. Does neuromuscular electrical stimulation enhance the effectiveness of an exercise programme in subjects with knee osteoarthritis? A randomized controlled trial. *Clin Rehabil* 2013;27:246-57.
32. Palmieri-Smith RM, Thomas AC, Karvonen-Gutierrez C, Sowers M. A clinical trial of neuromuscular electrical stimulation in improving quadriceps muscle strength and activation among women with mild and moderate osteoarthritis. *Phys Ther* 2010;90:1441-52.
33. Kucuk EB, Taskuran OO, Tokgoz N, Meray J. Effects of isokinetic, isometric, and aerobic exercises on clinical variables and knee cartilage volume using magnetic resonance imaging in patients with osteoarthritis. *Turk J Phys Med Rehab* 2018;64(1):8-16.
34. Huang L, Guo B, Xu F, Zhao J. Effects of quadriceps functional exercise with isometric contraction in the treatment of knee osteoarthritis. *Int J Rheum Dis*. 2018 May;21(5):952-959.

### **PICO 3: Neuromuscular training plus usual care compared to usual care for knee or hip OA**

Summary: Neuromuscular training is an exercise regimen designed to improve unconscious control of joints during dynamic activity. The literature search identified four randomized controlled trials <sup>[1-4]</sup> that addressed this PICO question. The RCTs provided direct evidence by comparing usual care in combination with neuromuscular training to usual care only. The studies by Larsen et al. and Villadsen et al. found greater (improved) mean differences in KOOS pain and function scores (knee) in the neuromuscular training participants compared to usual care.<sup>[1,4]</sup> It was not possible to blind participants in these studies. This was corroborated with studies by Simao et al. and Trans et al.<sup>[2,3]</sup> in which mean WOMAC pain scores (knee) were found to be lower in the neuromuscular training group compared to usual care. Villadsen et al.<sup>[4]</sup> also found a greater mean difference in KOOS pain and function scores favoring neuromuscular training for patients with hip osteoarthritis. The study by Larsen et al.<sup>[1]</sup> reported an increased odds of musculoskeletal adverse events for participants in the neuromuscular training group compared to usual care; there were fewer gastrointestinal, CNS/psychiatric, and skin/subcutaneous adverse events for neuromuscular participants.



However, none of the adverse event findings showed a statistically significant between group difference, and the imprecision in the findings means the possibility of no difference between groups cannot be ruled out.

A literature search update in August 2018 identified one additional RCT that addressed this comparison.<sup>[5]</sup> The findings of this study do not alter the findings in the tables below.

Quality of evidence across all critical outcomes: Moderate

| <b>Table 1. PICO 3- Neuromuscular Training + Usual Care Compared to Usual Care</b> |                      |                      |                     |                    |                         |                                      |                            |                                |                                 |                                     |                                                                                        |
|------------------------------------------------------------------------------------|----------------------|----------------------|---------------------|--------------------|-------------------------|--------------------------------------|----------------------------|--------------------------------|---------------------------------|-------------------------------------|----------------------------------------------------------------------------------------|
| <b>Certainty assessment</b>                                                        |                      |                      |                     |                    |                         |                                      | <b>Summary of findings</b> |                                |                                 |                                     |                                                                                        |
| <b>Nº of participants (studies) Follow-up</b>                                      | <b>Risk of bias</b>  | <b>Inconsistency</b> | <b>Indirectness</b> | <b>Imprecision</b> | <b>Publication bias</b> | <b>Overall certainty of evidence</b> | <b>Number of patients</b>  |                                | <b>Relative effect (95% CI)</b> | <b>Anticipated absolute effects</b> |                                                                                        |
|                                                                                    |                      |                      |                     |                    |                         |                                      | <b>With control</b>        | <b>With PICO 3-NM training</b> |                                 | <b>Risk with control</b>            | <b>Risk difference with PICO 3-NM training</b>                                         |
| <b>KOOS pain (mean change), knee (higher scores indicate reduction in pain)</b>    |                      |                      |                     |                    |                         |                                      |                            |                                |                                 |                                     |                                                                                        |
| 258 (2 RCTs)                                                                       | serious <sup>a</sup> | not serious          | not serious         | not serious        | none                    | ⊕⊕⊕○<br>MODERATE                     | 127                        | 131                            | -                               | -                                   | MD <b>2.18 higher</b><br>(1.73 higher to 2.64 higher)<br><br><b>Favors NM training</b> |
| <b>HOOS pain (mean change), hip (higher scores indicate reduction in pain)</b>     |                      |                      |                     |                    |                         |                                      |                            |                                |                                 |                                     |                                                                                        |

**Table 1. PICO 3- Neuromuscular Training + Usual Care Compared to Usual Care**

| Certainty assessment                                              |                      |             |             |                      |      |                  | Summary of findings |                  |                                  |               |                                                                                          |
|-------------------------------------------------------------------|----------------------|-------------|-------------|----------------------|------|------------------|---------------------|------------------|----------------------------------|---------------|------------------------------------------------------------------------------------------|
| 165<br>(1 RCT)                                                    | serious <sup>a</sup> | not serious | not serious | not serious          | none | ⊕⊕⊕○<br>MODERATE | 81                  | 84               | -                                | -             | MD <b>8.4 higher</b><br>(7.91 higher to 8.89 higher)<br><br><b>Favors NM training</b>    |
| <b>KOOS ADL (knee) (higher scores indicate reduction in pain)</b> |                      |             |             |                      |      |                  |                     |                  |                                  |               |                                                                                          |
| 258<br>(2 RCTs)                                                   | serious <sup>a</sup> | not serious | not serious | not serious          | none | ⊕⊕⊕○<br>MODERATE | 127                 | 131              | -                                | -             | MD <b>1.54 higher</b><br>(2.37 lower to 5.46 higher)                                     |
| <b>KOOS ADL (hip) (higher scores indicate reduction in pain)</b>  |                      |             |             |                      |      |                  |                     |                  |                                  |               |                                                                                          |
| 165<br>(1 RCT)                                                    | serious <sup>a</sup> | not serious | not serious | not serious          | none | ⊕⊕⊕○<br>MODERATE | 81                  | 84               | -                                | -             | MD <b>10.9 higher</b><br>(10.35 higher to 11.45 higher)<br><br><b>Favors NM training</b> |
| <b>Adverse events (abdominal and intestinal symptoms)</b>         |                      |             |             |                      |      |                  |                     |                  |                                  |               |                                                                                          |
| 93<br>(1 RCT)                                                     | serious <sup>a</sup> | not serious | not serious | serious <sup>b</sup> | none | ⊕⊕○○<br>LOW      | 25/47<br>(53.2%)    | 20/46<br>(43.5%) | <b>OR 0.68</b><br>(0.30 to 1.53) | 532 per 1,000 | <b>96 fewer per 1,000</b><br>(278 fewer to 103 more)                                     |

**Table 1. PICO 3- Neuromuscular Training + Usual Care Compared to Usual Care**

| Certainty assessment                                   |                      |             |             |                      |      | Summary of findings |                  |                  |                                  |               |                                                      |
|--------------------------------------------------------|----------------------|-------------|-------------|----------------------|------|---------------------|------------------|------------------|----------------------------------|---------------|------------------------------------------------------|
| <b>Adverse events (musculoskeletal symptoms)</b>       |                      |             |             |                      |      |                     |                  |                  |                                  |               |                                                      |
| 93<br>(1 RCT)                                          | serious <sup>a</sup> | not serious | not serious | serious <sup>b</sup> | none | ⊕⊕○○<br>LOW         | 16/47<br>(34.0%) | 21/46<br>(45.7%) | <b>OR 1.63</b><br>(0.70 to 3.76) | 340 per 1,000 | <b>116 more per 1,000</b><br>(75 fewer to 320 more)  |
| <b>Adverse events (CNS &amp; psychiatric symptoms)</b> |                      |             |             |                      |      |                     |                  |                  |                                  |               |                                                      |
| 93<br>(1 RCT)                                          | serious <sup>a</sup> | not serious | not serious | serious <sup>b</sup> | none | ⊕⊕○○<br>LOW         | 21/47<br>(44.7%) | 19/46<br>(41.3%) | <b>OR 0.87</b><br>(0.38 to 1.98) | 447 per 1,000 | <b>34 fewer per 1,000</b><br>(212 fewer to 168 more) |
| <b>Adverse events (skin &amp; subcutaneous)</b>        |                      |             |             |                      |      |                     |                  |                  |                                  |               |                                                      |
| 93<br>(1 RCT)                                          | serious <sup>a</sup> | not serious | not serious | serious <sup>b</sup> | none | ⊕⊕○○<br>LOW         | 12/47<br>(25.5%) | 9/46<br>(19.6%)  | <b>OR 0.71</b><br>(0.27 to 1.89) | 255 per 1,000 | <b>60 fewer per 1,000</b><br>(171 fewer to 138 more) |

**CI:** Confidence interval; **MD:** Mean difference; **OR:** Odds ratio

**Explanations**

- a. participants not blinded; all studies were single blind (outcome assessors or personnel blinded)
- b. Wide 95% CI that overlaps the line of no effect

**Table 2. RCT data not suitable for effect size calculation or combining with other data**

| Ref ID, Author, year | Study type | Duration | Population Description                                                                                                                                                                                                                                                                 | Treatment given to relevant population                                                                                                                                                                                                                                                                                                                                                                                                                                             | Results                                                                                                                                                                                                                                                                                                                                                                |
|----------------------|------------|----------|----------------------------------------------------------------------------------------------------------------------------------------------------------------------------------------------------------------------------------------------------------------------------------------|------------------------------------------------------------------------------------------------------------------------------------------------------------------------------------------------------------------------------------------------------------------------------------------------------------------------------------------------------------------------------------------------------------------------------------------------------------------------------------|------------------------------------------------------------------------------------------------------------------------------------------------------------------------------------------------------------------------------------------------------------------------------------------------------------------------------------------------------------------------|
| 3952_Simao           | RCT        | 12 weeks | <p>Group 1: N=10, mean age 75 (7.4), mean BMI 27.4 (9.7), % women 82</p> <p>Group 2: N= 10, mean age 69 (3.7), mean BMI 29.8 (2.53), % women 90</p> <p>Group 3: N=11, mean age 71 (5.3), mean BMI 26.7 (2.74), % women 91</p>                                                          | <p>Group 1: squat exercises on a vibratory platform(platform group)</p> <p>Group 2: squat exercises without vibration(squat group)</p> <p>Group 3: the control group.</p>                                                                                                                                                                                                                                                                                                          | <p><b>Change in WOMAC pain median (IQ range):</b></p> <p><b>Group 1:</b> -137.5 (-200 to 0)</p> <p><b>Group 2:</b> -62.5 (-325 to 75)</p> <p><b>Group 3:</b> 0 (-125 to 125)</p> <p><b>Change in WOMAC function median (IQ range):</b></p> <p><b>Group 1:</b> -175 (-550 to 100)</p> <p><b>Group 2:</b> -100 (-725 to 275)</p> <p><b>Group 3:</b> 75 (-225 to 400)</p> |
| 2555_Tran            | RCT        | 8 weeks  | <p>Only women</p> <p>-Clinical and radiographic knee OA, disease duration 2-10 years</p> <p>Group 1: N=18, mean age 58.7 (11.0), mean BMI 29.1 (5.8)</p> <p>Group 2: N=17, mean age 61.5 (9.2), mean BMI 29.2 (6.1)</p> <p>Group 3: N=17, mean age 61.1 (8.5), mean BMI 30.2 (5.4)</p> | <p>3 arms:</p> <p>1) Balance board with built-in vibration (n=18): vibration frequency increased gradually from 24 Hz to 30 Hz, supervised by physiotherapist, usual care with paracetamol/nsaids, N=18</p> <p>2) Stable vibration platform (n=17): vibration frequency increased gradually from 24 Hz to 30 Hz, supervised by physiotherapist, usual care with paracetamol/nsaids.N=17</p> <p>3) Control (n=17): No training session, usual care with paracetamol/nsaids N=17</p> | <p><b>WOMAC pain, weighted mean difference (95% CI):</b></p> <p><b>Group 1 vs 3:</b> -6.8 (-20.1-6.6)</p> <p><b>Group 2 vs 3:</b> -1.4 (-14.6-11.9)</p>                                                                                                                                                                                                                |

| Ref ID, Author, year  | Study type | Duration | Population Description                                                                                                                                              | Treatment given to relevant population                                                                                                         | Results                                                                                                                                                                                               |
|-----------------------|------------|----------|---------------------------------------------------------------------------------------------------------------------------------------------------------------------|------------------------------------------------------------------------------------------------------------------------------------------------|-------------------------------------------------------------------------------------------------------------------------------------------------------------------------------------------------------|
| 2561_Holsgaard-Larsen | RCT        | 8 weeks  | N=93, men + women (62% in Nemex group, 54% in control group) with Knee OA defined clinically (ACR criteria)<br><br>-Ages 40-70, mean ae 58years<br><br>-mean BMI 27 | 1) Group 1: NEMEX arm: supervised neuromuscular exercises for 8 weeks<br><br>2) Group 2: acetaminophen 2000mg/day or equivalent dose of nsoids | <b>Between group difference in outcomes from baseline (95% CI):</b><br><b>Koos pain:</b> -2.07 (-6.45, 2.29)<br><b>Koos ADL:</b> 0.5 (-4.02, 5.01)<br><b>Koos sports/recrea:</b> -2.83 (-10.38, 4.72) |

## References

1. Holsgaard-Larsen A, Clausen B, Sondergaard J, Christensen R, Andriacchi TP, Roos EM. The effect of instruction in analgesic use compared with neuromuscular exercise on knee-joint load in patients with knee osteoarthritis: a randomized, single-blind, controlled trial. *Osteoarthritis Cartilage*. 2017;25(4):470-480.
2. Trans T, Aaboe J, Henriksen M, Christensen R, Bliddal H, Lund H. Effect of whole body vibration exercise on muscle strength and proprioception in females with knee osteoarthritis. *Knee*. 2009;16(4):256-261.
3. Simao AP, Avelar NC, Tossige-Gomes R, Neves CD, Mendonca VA, Miranda AS, et al. Functional performance and inflammatory cytokines after squat exercises and whole-body vibration in elderly individuals with knee osteoarthritis. *Arch Phys Med Rehabil*. 2012;93(10):1692-1700.
4. Villadsen A, Overgaard S, Holsgaard-Larsen A, Christensen R, Roos EM. Immediate efficacy of neuromuscular exercise in patients with severe osteoarthritis of the hip or knee: a secondary analysis from a randomized controlled trial. *J Rheumatol*. 2014;41(7):1385-1394.
5. Holsgaard-Larsen A, Christensen R, Clausen B, Søndergaard J, Andriacchi TP, Roos EM. One year effectiveness of neuromuscular exercise compared with instruction in analgesic use on knee function in patients with early knee osteoarthritis: the EXERPHARMA randomized trial. *Osteoarthritis Cartilage*. 2018 Jan;26(1):28-33.

**PICO 4: Aquatic exercises compared to usual care for knee/hip OA**

Summary. Twelve RCTs<sup>[1-12]</sup> compared aquatic exercise to usual care for the treatment of knee and/or hip OA. In adults with knee OA, aquatic exercise did not result in greater improvements in knee pain, self-reported function, or performance based function (Table 1); however, the certainty in these outcomes was low, due to wide confidence intervals for all outcomes.<sup>[1-4]</sup> Lund et al.<sup>[3]</sup> also reported no increased risk of pain for those undergoing aquatic exercise; however, the confidence intervals were wide.

Two studies<sup>[5,6]</sup> evaluated aquatic exercise in adults with hip OA (Table 2). Stener-Victorin et al.<sup>[6]</sup> observed an improvement in hip pain that lasted up to 6-months after the intervention, however the sample size was small. Arnold et al.<sup>[5]</sup> did not observe differences in performance-based function (6MWT, 30-sec chair stand, and TUG cognitive). There is reduced confidence in these results as only one study reported each outcome.

Six studies<sup>[7-12]</sup> evaluated aquatic exercise in mixed samples of knee and/or hip OA. The meta-analysis indicated that those who participated in aquatic exercise reported greater improvements in pain<sup>[7-11]</sup>, self-reported function<sup>[7-11]</sup>, and performance-based function (6MWT<sup>[7,8]</sup>, TUG<sup>[7,9,11]</sup>, stair climbing<sup>[9,10]</sup>). One smaller study<sup>[12]</sup> did not report results conducive to meta-analysis, and reported no difference between the aquatic exercise group and a control group.

The participants were not blinded in any studies comparing aquatic exercise to a control.

Quality of evidence across all critical outcomes: Moderate

| <b>Table 1. Aquatic exercises compared to usual care for Knee OA</b> |                     |                      |                     |                    |                         |                                      |                                                      |                                               |                                 |                                     |                                                               |
|----------------------------------------------------------------------|---------------------|----------------------|---------------------|--------------------|-------------------------|--------------------------------------|------------------------------------------------------|-----------------------------------------------|---------------------------------|-------------------------------------|---------------------------------------------------------------|
| <b>Certainty assessment</b>                                          |                     |                      |                     |                    |                         |                                      | <b>Summary of findings</b>                           |                                               |                                 |                                     |                                                               |
| <b>Nº of participants (studies) Follow-up</b>                        | <b>Risk of bias</b> | <b>Inconsistency</b> | <b>Indirectness</b> | <b>Imprecision</b> | <b>Publication bias</b> | <b>Overall certainty of evidence</b> | <b>Number of Participants/ Study event rates (%)</b> |                                               | <b>Relative effect (95% CI)</b> | <b>Anticipated absolute effects</b> |                                                               |
|                                                                      |                     |                      |                     |                    |                         |                                      | <b>With placebo</b>                                  | <b>With Aquatic v. Usual Care for Knee OA</b> |                                 | <b>Risk with placebo</b>            | <b>Risk difference with Aquatic v. Usual Care for Knee OA</b> |
| <b>Pain (lower scores indicate improvement)</b>                      |                     |                      |                     |                    |                         |                                      |                                                      |                                               |                                 |                                     |                                                               |

**Table 1. Aquatic exercises compared to usual care for Knee OA**

| Certainty assessment                                                                                   |                      |                      |             |                      |      |                  | Summary of findings |     |   |   |                                                                                  |
|--------------------------------------------------------------------------------------------------------|----------------------|----------------------|-------------|----------------------|------|------------------|---------------------|-----|---|---|----------------------------------------------------------------------------------|
| 199<br>(3 RCTs)                                                                                        | serious <sup>a</sup> | serious <sup>b</sup> | not serious | serious <sup>c</sup> | none | ⊕⊕○○<br>LOW      | 98                  | 101 | - | - | SMD <b>0.01 lower</b><br>(0.78 lower to 0.75 higher)                             |
| <b>Self-reported function (lower scores indicate improvement)</b>                                      |                      |                      |             |                      |      |                  |                     |     |   |   |                                                                                  |
| 243<br>(4 RCTs)                                                                                        | serious <sup>a</sup> | not serious          | not serious | not serious          | none | ⊕⊕⊕○<br>MODERATE | 118                 | 125 | - | - | SMD <b>0.35 lower</b><br>(0.67 lower to 0.03 lower)<br><br><b>Favors aquatic</b> |
| <b>Pain - Long-term follow-up (&gt;12-months) (lower scores indicate improvement)</b>                  |                      |                      |             |                      |      |                  |                     |     |   |   |                                                                                  |
| 76<br>(1 RCT)                                                                                          | serious <sup>a</sup> | not serious          | not serious | serious <sup>c</sup> | none | ⊕⊕○○<br>LOW      | 36                  | 40  | - | - | SMD <b>0.15 lower</b><br>(0.6 lower to 0.3 higher)                               |
| <b>Self-reported function - Long-term follow-up (&gt;12-month) (lower scores indicate improvement)</b> |                      |                      |             |                      |      |                  |                     |     |   |   |                                                                                  |
| 76<br>(1 RCT)                                                                                          | serious <sup>a</sup> | not serious          | not serious | serious <sup>c</sup> | none | ⊕⊕○○<br>LOW      | 36                  | 40  | - | - | SMD <b>0.07 lower</b><br>(0.52 lower to 0.38 higher)                             |
| <b>Gait speed (higher scores indicate improvement)</b>                                                 |                      |                      |             |                      |      |                  |                     |     |   |   |                                                                                  |

**Table 1. Aquatic exercises compared to usual care for Knee OA**

| Certainty assessment                                                                         |                      |             |             |                      |      |                  | Summary of findings |                 |                                    |             |                                                                                    |
|----------------------------------------------------------------------------------------------|----------------------|-------------|-------------|----------------------|------|------------------|---------------------|-----------------|------------------------------------|-------------|------------------------------------------------------------------------------------|
| 84<br>(1 RCT)                                                                                | serious <sup>a</sup> | not serious | not serious | not serious          | none | ⊕⊕⊕○<br>MODERATE | 42                  | 42              | -                                  | -           | MD <b>0.05 higher</b><br>(0.04 higher to 0.07 higher)<br><br><b>Favors aquatic</b> |
| <b>Gait speed - Long-term follow-up (&gt;12 months) (higher scores indicate improvement)</b> |                      |             |             |                      |      |                  |                     |                 |                                    |             |                                                                                    |
| 76<br>(1 RCT)                                                                                | serious <sup>a</sup> | not serious | not serious | not serious          | none | ⊕⊕⊕○<br>MODERATE | 36                  | 40              | -                                  | -           | MD <b>0.05 higher</b><br>(0.03 higher to 0.06 higher)<br><br><b>Favors aquatic</b> |
| <b>Safety: Increased pain</b>                                                                |                      |             |             |                      |      |                  |                     |                 |                                    |             |                                                                                    |
| 50<br>(1 RCT)                                                                                | serious <sup>a</sup> | not serious | not serious | serious <sup>c</sup> | none | ⊕⊕○○<br>LOW      | 0/24<br>(0.0%)      | 3/26<br>(11.5%) | <b>OR 7.30</b><br>(0.36 to 149.06) | 0 per 1,000 | <b>Not calculable</b>                                                              |

**CI:** Confidence interval; **SMD:** Standardised mean difference; **MD:** Mean difference; **OR:** Odds ratio

**Explanations**

- a. Participants not blinded, most studies blinded outcome assessors
- b. I-squared=86%
- c. Wide CI



**Table 2. Aquatic exercises compared to Usual Care for Hip OA**

| Certainty assessment                                                       |                      |               |              |                      |                  |                               | Summary of findings        |              |                          |                                 |                                                        |
|----------------------------------------------------------------------------|----------------------|---------------|--------------|----------------------|------------------|-------------------------------|----------------------------|--------------|--------------------------|---------------------------------|--------------------------------------------------------|
| № of participants (studies)<br>Follow-up                                   | Risk of bias         | Inconsistency | Indirectness | Imprecision          | Publication bias | Overall certainty of evidence | Number of participants     |              | Relative effect (95% CI) | Anticipated absolute effects    |                                                        |
|                                                                            |                      |               |              |                      |                  |                               | With Usual Care for Hip OA | With Aquatic |                          | Risk with Usual Care for Hip OA | Risk difference with Aquatic                           |
| <b>6-min Walk Test (higher scores indicate improvement)</b>                |                      |               |              |                      |                  |                               |                            |              |                          |                                 |                                                        |
| 51 (1 RCT)                                                                 | serious <sup>a</sup> | not serious   | not serious  | serious <sup>b</sup> | none             | ⊕⊕○○<br>LOW                   | 25                         | 26           | -                        | -                               | MD <b>14.2 higher</b><br>(24.51 lower to 52.91 higher) |
| <b>30-sec chair stand (higher scores indicate improvement)</b>             |                      |               |              |                      |                  |                               |                            |              |                          |                                 |                                                        |
| 51 (1 RCT)                                                                 | serious <sup>a</sup> | not serious   | not serious  | not serious          | none             | ⊕⊕⊕○<br>MODERATE              | 25                         | 26           | -                        | -                               | MD <b>0</b><br>(0.93 lower to 0.93 higher)             |
| <b>TUG - cognitive (dual task TUG) (lower scores indicate improvement)</b> |                      |               |              |                      |                  |                               |                            |              |                          |                                 |                                                        |
| 51 (1 RCT)                                                                 | serious <sup>a</sup> | not serious   | not serious  | not serious          | none             | ⊕⊕⊕○<br>MODERATE              | 25                         | 26           | -                        | -                               | MD <b>0.9 lower</b><br>(2.96 lower to 1.16 higher)     |

CI: Confidence interval; MD: Mean difference

**Explanations**

- a. Participants not blinded; outcome assessors were blinded

b. Wide CI

| <b>Table 3. Aquatic exercises compared to Usual Care for Knee or Hip OA</b> |                      |                      |                     |                    |                         |                                      |                                           |                     |                                 |                                                |                                                                              |
|-----------------------------------------------------------------------------|----------------------|----------------------|---------------------|--------------------|-------------------------|--------------------------------------|-------------------------------------------|---------------------|---------------------------------|------------------------------------------------|------------------------------------------------------------------------------|
| <b>Certainty assessment</b>                                                 |                      |                      |                     |                    |                         |                                      | <b>Summary of findings</b>                |                     |                                 |                                                |                                                                              |
| <b>Nº of participants (studies) Follow-up</b>                               | <b>Risk of bias</b>  | <b>Inconsistency</b> | <b>Indirectness</b> | <b>Imprecision</b> | <b>Publication bias</b> | <b>Overall certainty of evidence</b> | <b>Number of participants</b>             |                     | <b>Relative effect (95% CI)</b> | <b>Anticipated absolute effects</b>            |                                                                              |
|                                                                             |                      |                      |                     |                    |                         |                                      | <b>With Usual Care for Knee or Hip OA</b> | <b>With Aquatic</b> |                                 | <b>Risk with Usual Care for Knee or Hip OA</b> | <b>Risk difference with Aquatic</b>                                          |
| <b>Pain (lower scores indicate improvement)</b>                             |                      |                      |                     |                    |                         |                                      |                                           |                     |                                 |                                                |                                                                              |
| 550 (5 RCTs)                                                                | serious <sup>a</sup> | not serious          | not serious         | not serious        | none                    | ⊕⊕⊕○<br>MODERATE                     | 267                                       | 283                 | -                               | -                                              | SMD <b>0.32 lower</b><br>(0.51 lower to 0.12 lower)<br><b>Favors aquatic</b> |
| <b>Self-reported function (lower scores indicate improvement)</b>           |                      |                      |                     |                    |                         |                                      |                                           |                     |                                 |                                                |                                                                              |
| 545 (5 RCTs)                                                                | serious <sup>a</sup> | not serious          | not serious         | not serious        | none                    | ⊕⊕⊕○<br>MODERATE                     | 265                                       | 280                 | -                               | -                                              | SMD <b>0.32 lower</b><br>(0.49 lower to 0.15 lower)<br><b>Favors aquatic</b> |
| <b>TUG (lower scores indicate improvement)</b>                              |                      |                      |                     |                    |                         |                                      |                                           |                     |                                 |                                                |                                                                              |

**Table 3. Aquatic exercises compared to Usual Care for Knee or Hip OA**

| Certainty assessment                                          |                      |             |             |                      |      |                  | Summary of findings |     |   |   |                                                                                 |
|---------------------------------------------------------------|----------------------|-------------|-------------|----------------------|------|------------------|---------------------|-----|---|---|---------------------------------------------------------------------------------|
| 202<br>(3 RCTs)                                               | serious <sup>a</sup> | not serious | not serious | not serious          | none | ⊕⊕⊕○<br>MODERATE | 91                  | 111 | - | - | MD <b>0.89 lower</b><br>(1.32 lower to 0.47 lower)<br><br><b>Favors aquatic</b> |
| <b>6MWT (higher scores indicate improvement)</b>              |                      |             |             |                      |      |                  |                     |     |   |   |                                                                                 |
| 109<br>(2 RCTs)                                               | serious <sup>a</sup> | not serious | not serious | serious <sup>b</sup> | none | ⊕⊕○○<br>LOW      | 53                  | 56  | - | - | MD <b>27.89 higher</b><br>(4.25 lower to 60.02 higher)                          |
| <b>Stair climbing (lower scores indicate improvement)</b>     |                      |             |             |                      |      |                  |                     |     |   |   |                                                                                 |
| 96<br>(1 RCT)                                                 | serious <sup>a</sup> | not serious | not serious | not serious          | none | ⊕⊕⊕○<br>MODERATE | 41                  | 55  | - | - | MD <b>1.6 lower</b><br>(2.71 lower to 0.49 lower)<br><br><b>Favors aquatic</b>  |
| <b>Timed stair ascent (lower scores indicate improvement)</b> |                      |             |             |                      |      |                  |                     |     |   |   |                                                                                 |

| <b>Table 3. Aquatic exercises compared to Usual Care for Knee or Hip OA</b> |                      |             |             |                      |      |                  |                            |     |   |   |                                                                                 |
|-----------------------------------------------------------------------------|----------------------|-------------|-------------|----------------------|------|------------------|----------------------------|-----|---|---|---------------------------------------------------------------------------------|
| <b>Certainty assessment</b>                                                 |                      |             |             |                      |      |                  | <b>Summary of findings</b> |     |   |   |                                                                                 |
| 309<br>(1 RCT)                                                              | serious <sup>a</sup> | not serious | not serious | not serious          | none | ⊕⊕⊕○<br>MODERATE | 157                        | 152 | - | - | MD <b>0.54 lower</b><br>(1.06 lower to 0.02 lower)<br><br><b>Favors aquatic</b> |
| <b>Timed stair descent (lower scores indicate improvement)</b>              |                      |             |             |                      |      |                  |                            |     |   |   |                                                                                 |
| 308<br>(1 RCT)                                                              | serious <sup>a</sup> | not serious | not serious | not serious          | none | ⊕⊕⊕○<br>MODERATE | 157                        | 151 | - | - | MD <b>0.67 lower</b><br>(1.19 lower to 0.15 lower)<br><br><b>Favors aquatic</b> |
| <b>8ft walk timed (lower scores indicate improvement)</b>                   |                      |             |             |                      |      |                  |                            |     |   |   |                                                                                 |
| 312<br>(1 RCT)                                                              | serious <sup>a</sup> | not serious | not serious | serious <sup>b</sup> | none | ⊕⊕○○<br>LOW      | 159                        | 153 | - | - | MD <b>0.33 lower</b><br>(0.67 lower to 0.01 higher)                             |

**CI:** Confidence interval; **SMD:** Standardised mean difference; **MD:** Mean difference

### Explanations

a. Participants not blinded; most studies blinded outcome assessors

b. Wide CI

**Table 4. RCTs with data not usable in RevMan**

| Ref ID, Author, year          | Study type                                                           | Duration            | Population Description                                                                                                                                                                                   | Treatment given to relevant population                                                                                                                                                                                 | Results                                                                                                                                                                                                                                                                                                                                                                                                                          |
|-------------------------------|----------------------------------------------------------------------|---------------------|----------------------------------------------------------------------------------------------------------------------------------------------------------------------------------------------------------|------------------------------------------------------------------------------------------------------------------------------------------------------------------------------------------------------------------------|----------------------------------------------------------------------------------------------------------------------------------------------------------------------------------------------------------------------------------------------------------------------------------------------------------------------------------------------------------------------------------------------------------------------------------|
| 1211<br>Stener-Victorin, 2004 | RCT<br><br>Low quality                                               | 5 week intervention | Hip OA (on THR waitlist)<br><br>Aquatic (n=15, 70.3 years, 8F:7M)<br>Control (n=15, 65.5 years, 9F:6M)                                                                                                   | 2x/week for 5 weeks, 30 min each<br><br>Aquatic (warm-up, mobility, strengthening, stretching + patient education)<br>Control (patient education only; 2 meetings, 2 hours each - disease info, home exercise program) | Outcomes available at pre, post, 1m-post, 3m-post, 6m-post<br><br>Reported here pre, 1-month, 6-month; did not report post because not given for control group<br><br>VAS pain with motion/load [medians (25 <sup>th</sup> , 75 <sup>th</sup> )]<br>Aquatic:<br>- Pre: 55 (32, 64)<br>- 1-month: 30 (18, 59)<br>- 6-months: 28 (18, 70)<br>Control:<br>- Pre: 56 (46, 70)<br>- 1-month: 48.5 (26, 66)<br>- 6-months: 59 (51, 69) |
| 1890, Foley, 2003             | RCT<br><br>Moderate quality – participants not blinded, otherwise ok | 6 week intervention | Hip or knee OA:<br><br>Group 1 (hydrotherapy: n = 35, mean age 73.0 (8.2), 43% female<br><br>Group 2 (exercise): n = 35, mean age 69.8 (9.2), 49% female<br><br>Group 3 (control): n = 35, mean age 69.8 | 3 arms, 3 exercise sessions/week for 6 weeks:<br><br>Group 1: hydrotherapy (n = 35)<br><br>Group 2: exercise (n = 35)<br><br>Group 3: control (n = 35).                                                                | Comparisons for hydrotherapy vs. control:<br><br>All results presented as median (IQR):<br>WOMAC Pain at post – median change:<br>Hydro: -1.0 (3.0)<br>Control: 1.0 (3.0)<br><br>WOMAC Function – median change:<br>Hydro: -1.0 (10.0)<br>Control: 0.0 (8.0)<br><br>6MWT – median change (IQR)                                                                                                                                   |

|  |  |  |                   |                                                                                                                                                                                                                                                                                                                                                                                                                                                                                                                                                                                                                                                           |
|--|--|--|-------------------|-----------------------------------------------------------------------------------------------------------------------------------------------------------------------------------------------------------------------------------------------------------------------------------------------------------------------------------------------------------------------------------------------------------------------------------------------------------------------------------------------------------------------------------------------------------------------------------------------------------------------------------------------------------|
|  |  |  | (9.0), 57% female | <p>The figure contains two dot plots. The top plot shows 'Walk distance (m)' on the y-axis (ranging from -50 to 200) for three groups: Hydro, Gym, and Control. The Hydro group has a median change of approximately 55m, the Gym group approximately 45m, and the Control group approximately 25m. The bottom plot shows 'Walking speed (m/s)' on the y-axis (ranging from -0.1 to 0.25) for the same three groups. The Hydro group has a median change of approximately 0.1 m/s, the Gym group approximately 0.11 m/s, and the Control group approximately 0.02 m/s. Both plots use vertical error bars to represent the interquartile range (IQR).</p> |
|--|--|--|-------------------|-----------------------------------------------------------------------------------------------------------------------------------------------------------------------------------------------------------------------------------------------------------------------------------------------------------------------------------------------------------------------------------------------------------------------------------------------------------------------------------------------------------------------------------------------------------------------------------------------------------------------------------------------------------|

## References

1. Dias JM, Cisneros L, Dias R, Fritsch C, Gomes W, Pereira L, et al. Hydrotherapy improves pain and function in older women with knee osteoarthritis: a randomized controlled trial. *Braz J Phys Ther.* 2017;21(6):449-456.
2. Waller B, Munukka M, Rantalainen T, Lammentausta E, Nieminen MT, Kiviranta I, et al. Effects of high intensity resistance aquatic training on body composition and walking speed in women with mild knee osteoarthritis: a 4-month RCT with 12-month follow-up. *Osteoarthritis Cartilage.* 2017;25(8):1238-1246.
3. Lund H, Weile U, Christensen R, Rostock B, Downey A, Bartels EM, et al. A randomized controlled trial of aquatic and land-based exercise in patients with knee osteoarthritis. *J Rehabil Med.* 2008;40(2):137-144.
4. Lim JY, Tchai E, Jang SN. Effectiveness of aquatic exercise for obese patients with knee osteoarthritis: a randomized controlled trial. *PM R.* 2010;2(8):723-731; quiz 793.
5. Arnold CM, Faulkner RA. The effect of aquatic exercise and education on lowering fall risk in older adults with hip osteoarthritis. *J Aging Phys Act.* 2010;18(3):245-260.

6. Stener-Victorin E, Kruse-Smidje C, Jung K. Comparison between electro-acupuncture and hydrotherapy, both in combination with patient education and patient education alone, on the symptomatic treatment of osteoarthritis of the hip. *Clin J Pain*. 2004;20(3):179-185.
7. Hinman RS, Heywood SE, Day AR. Aquatic physical therapy for hip and knee osteoarthritis: results of a single-blind randomized controlled trial. *Phys Ther*. 2007;87(1):32-43.
8. Wang TJ, Belza B, Elaine Thompson F, Whitney JD, Bennett K. Effects of aquatic exercise on flexibility, strength and aerobic fitness in adults with osteoarthritis of the hip or knee. *J Adv Nurs*. 2007;57(2):141-152.
9. Fransen M, Nairn L, Winstanley J, Lam P, Edmonds J. Physical activity for osteoarthritis management: a randomized controlled clinical trial evaluating hydrotherapy or Tai Chi classes. *Arthritis Rheum*. 2007;57(3):407-414.
10. Cochrane T, Davey RC, Matthes Edwards SM. Randomised controlled trial of the cost-effectiveness of water-based therapy for lower limb osteoarthritis. *Health Technol Assess*. 2005;9(31):iii-iv, ix-xi, 1-114.
11. Hale LA, Waters D, Herbison P. A randomized controlled trial to investigate the effects of water-based exercise to improve falls risk and physical function in older adults with lower-extremity osteoarthritis. *Arch Phys Med Rehabil*. 2012;93(1):27-34.
12. Foley A, Halbert J, Hewitt T, Crotty M. Does hydrotherapy improve strength and physical function in patients with osteoarthritis--a randomised controlled trial comparing a gym based and a hydrotherapy based strengthening programme. *Ann Rheum Dis*. 2003;62(12):1162-1167.

**PICO 5: Balance training compared to usual care for knee OA**

Summary: Four RCTs<sup>[1-4]</sup> compared balance training compared to usual care for the treatment of knee OA. The meta-analysis of three studies<sup>[1,2,4]</sup> and the supplemental results of an additional study<sup>[3]</sup> indicate that balance training may improve pain and performance-based function in adults with knee OA. However, the quality of evidence was low due to lack of blinding, high inconsistency, small sample sizes, and wide confidence intervals.

Quality of evidence across all critical outcomes: Low

| <b>Table 1. Balance training compared to usual care for knee OA</b> |                     |                       |                      |                     |                         |                          |                               |                        |                                     |
|---------------------------------------------------------------------|---------------------|-----------------------|----------------------|---------------------|-------------------------|--------------------------|-------------------------------|------------------------|-------------------------------------|
| <b>Certainty assessment</b>                                         |                     |                       |                      |                     |                         |                          | <b>Summary of findings</b>    |                        |                                     |
| <b>Nº of participan</b>                                             | <b>Risk of bias</b> | <b>Inconsisten cy</b> | <b>Indirectne ss</b> | <b>Imprecisio n</b> | <b>Publication bias</b> | <b>Overall certainty</b> | <b>Number of participants</b> | <b>Relative effect</b> | <b>Anticipated absolute effects</b> |
|                                                                     |                     |                       |                      |                     |                         |                          |                               |                        |                                     |

**Table 1. Balance training compared to usual care for knee OA**

| Certainty assessment                                                                |                      |             |             |                        |      |             | Summary of findings         |                       |          |                                  |                                                                                          |
|-------------------------------------------------------------------------------------|----------------------|-------------|-------------|------------------------|------|-------------|-----------------------------|-----------------------|----------|----------------------------------|------------------------------------------------------------------------------------------|
| ts (studies) Follow-up                                                              |                      |             |             |                        |      | of evidence | With Usual care for knee OA | With Balance training | (95% CI) | Risk with Usual care for knee OA | Risk difference with Balance training                                                    |
| <b>WOMAC pain (mean, post intervention) (lower scores indicate improvement)</b>     |                      |             |             |                        |      |             |                             |                       |          |                                  |                                                                                          |
| 70 (2 RCTs)                                                                         | serious <sup>a</sup> | not serious | not serious | serious <sup>c</sup>   | none | ⊕⊕○○<br>LOW | 32                          | 38                    | -        | -                                | SMD <b>0.46 lower</b><br>(1.39 lower to 0.46 higher)                                     |
| <b>NRS Pain (mean, post-intervention) (lower scores indicate improvement)</b>       |                      |             |             |                        |      |             |                             |                       |          |                                  |                                                                                          |
| 44 (1 RCT)                                                                          | serious <sup>a</sup> | not serious | not serious | serious <sup>c,d</sup> | none | ⊕⊕○○<br>LOW | 22                          | 22                    | -        | -                                | SMD <b>0.97 lower</b><br>(1.6 lower to 0.34 lower)<br><br><b>Favors balance training</b> |
| <b>WOMAC function (mean, post intervention) (lower scores indicate improvement)</b> |                      |             |             |                        |      |             |                             |                       |          |                                  |                                                                                          |
| 114 (3 RCTs)                                                                        | serious <sup>a</sup> | not serious | not serious | serious <sup>c</sup>   | none | ⊕⊕○○<br>LOW | 54                          | 60                    | -        | -                                | SMD <b>0.51 lower</b><br>(1.29 lower to 0.26 higher)                                     |

CI: Confidence interval; SMD: Standardised mean difference

**Explanations**

- a. Participants and investigators not blinded; no mention of blinding outcome assessors
- c. Wide CI
- d. Single study, small sample size



**Table 2. RCTs with data not suitable for RevMan**

| Ref ID, Author, year | Study type         | Duration | Population Description                                                                                                 | Treatment given to relevant population                                                                                                                                                                                                                 | Results                                                                                                                                                                                                                                                                                                                                                                                                                                                                                                                                                                                                                                                                                                                                                                                                                                                                                                                                                                           |
|----------------------|--------------------|----------|------------------------------------------------------------------------------------------------------------------------|--------------------------------------------------------------------------------------------------------------------------------------------------------------------------------------------------------------------------------------------------------|-----------------------------------------------------------------------------------------------------------------------------------------------------------------------------------------------------------------------------------------------------------------------------------------------------------------------------------------------------------------------------------------------------------------------------------------------------------------------------------------------------------------------------------------------------------------------------------------------------------------------------------------------------------------------------------------------------------------------------------------------------------------------------------------------------------------------------------------------------------------------------------------------------------------------------------------------------------------------------------|
| 5485, Sekir, 2005    | RCT<br>Low quality | 6 weeks  | Knee OA (bilateral ACR criteria)<br><br>Treatment (n=12, 9F:3M, age 59(8.9))<br><br>Control (n=10, 7F:3M, age 62(8.1)) | Treatment (dynamic balance exercises including walking and stairs in different conditions; frequency progressive from week 1 to week 6, however unclear if increased reps in a session, or increased sessions in a week)<br><br>Control (no treatment) | Results presented as <b>mean (IQR)</b> .<br><br>VAS pain with walking (15m walk):<br>Training Pre: 3.5 (1.0, 6.9) Post: 1.6 (.0, 2.7)<br>Non-training Pre: 3.4 (1.7, 5.6) Post: 3.9 (1.3, 6.3)<br><br>15-m walk time:<br>Training Pre: 10.3 (9.1, 11.8) Post: 9.4 (8.3, 10.8)<br>Non-training Pre: 12.1 (10.6, 13.3) Post: 11.9 (10.5, 13.1)<br><br>Ambulatory negotiation (Stand-up and 15-m walk) time:<br>Training Pre: 11.3 (10.7, 12.9) Post: 10.0 (8.6, 11.5)<br>Non-training Pre: 13.3 (11.7, 15.5) Post: 12.6 (10.8, 14.6)<br><br>Chair Rise time:<br>Training Pre: 30.2 (26.8, 34.8) Post: 26.5 (23.2, 31.9)<br>Non-training Pre: 32.8 (28.8, 35.4) Post: 31.8 (28.9, 33.1)<br><br>Descending stairs time:<br>Training Pre: 8.1 (6.6, 9.9) Post: 6.2 (5.2, 6.9)<br>Non-training Pre: 10.9 (6.6, 13.3) Post: 10.3 (6.6, 10.2)<br><br>Ascending stairs time:<br>Training pre: 8.2 (7.0, 9.7) Post: 7.0 (6.0, 8.3)<br>Non-training pre: 9.2 (7.2, 9.5) post: 8.9 (7.0, 9.2) |

**References**

1. Rogers MW, Tamulevicius N, Semple SJ, Krkeljas Z. Efficacy of home-based kinesthesia, balance & agility exercise training among persons with symptomatic knee osteoarthritis. *J Sports Sci Med.* 2012;11(4):751-758.
2. Duman I, Taskaynatan MA, Mohur H, Tan AK. Assessment of the impact of proprioceptive exercises on balance and proprioception in patients with advanced knee osteoarthritis. *Rheumatol Int.* 2012;32(12):3793-3798.

3. Sekir U, Gur H. A multi-station proprioceptive exercise program in patients with bilateral knee osteoarthritis: functional capacity, pain and sensorimotor function. A randomized controlled trial. *J Sports Sci Med.* 2005;4(4):590-603.
4. Kumar, S. Proprioceptive training as an adjunct in osteoarthritis of the knee. *J Musculoskel Res* 2013;16:10 p.

**PICO 6. Walking compared to usual care for patients with knee or hip OA**

Summary: Studies that addressed this question also addressed PICO 1 and are included in that evidence summary.

**PICO 7: Strength training compared to aerobic exercise for knee and/or hip OA**

Summary: Two studies<sup>1,2</sup> compared strength training and aerobic exercise for the treatment of knee OA, while one study<sup>3</sup> compared these interventions for the treatment of hip OA. The comparisons between adults with knee OA who underwent strength training compared to aerobic exercise (walking program) were inconclusive with regard to pain, self-reported function, and performance-based function (including a 6-minute walk test, 30-second chair stand test, and the stair climbing test). The findings were imprecise since most outcomes were evaluated in a single study with low sample size and the confidence intervals were wide. In adults with hip OA, Bieler et al.<sup>3</sup> evaluated the effects of a Nordic walking program compared to strength training and home exercises. They observed that the Nordic walking group demonstrated greater improvements in the 6-minute walk test at post-treatment and at 8-month follow up and in the Timed-Up and Go (TUG) at 8-month follow-up. Other pain, self-report function, and performance-based measures were similar between the groups, however some results (TUG at post-treatment, and self-reported function, chair stand test, and stair climbing test at 8-month follow-up) were imprecise with wide confidence intervals.<sup>3</sup>

Quality of Evidence: Very low for knee OA; Low for hip OA

| <b>Table 1. Strength training compared to Aerobic exercise for Knee OA</b> |                     |                      |                     |                    |                         |                                      |                                          |                               |                                 |                                               |                                               |
|----------------------------------------------------------------------------|---------------------|----------------------|---------------------|--------------------|-------------------------|--------------------------------------|------------------------------------------|-------------------------------|---------------------------------|-----------------------------------------------|-----------------------------------------------|
| <b>Certainty assessment</b>                                                |                     |                      |                     |                    |                         |                                      | <b>Summary of findings</b>               |                               |                                 |                                               |                                               |
| <b>Nº of participants (studies) Follow-up</b>                              | <b>Risk of bias</b> | <b>Inconsistency</b> | <b>Indirectness</b> | <b>Imprecision</b> | <b>Publication bias</b> | <b>Overall certainty of evidence</b> | <b>Number of participants</b>            |                               | <b>Relative effect (95% CI)</b> | <b>Anticipated absolute effects</b>           |                                               |
|                                                                            |                     |                      |                     |                    |                         |                                      | <b>With Aerobic exercise for Knee OA</b> | <b>With Strength training</b> |                                 | <b>Risk with Aerobic exercise for Knee OA</b> | <b>Risk difference with Strength training</b> |
| <b>WOMAC Pain (0-20, lower score indicates pain reduction)</b>             |                     |                      |                     |                    |                         |                                      |                                          |                               |                                 |                                               |                                               |

**Table 1. Strength training compared to Aerobic exercise for Knee OA**

| Certainty assessment                                                  |                      |                      |             |                      |      |                  | Summary of findings |     |   |   |                                                      |
|-----------------------------------------------------------------------|----------------------|----------------------|-------------|----------------------|------|------------------|---------------------|-----|---|---|------------------------------------------------------|
| 29<br>(1 RCT)                                                         | serious <sup>a</sup> | not serious          | not serious | serious <sup>b</sup> | none | ⊕⊕○○<br>LOW      | 14                  | 15  | - | - | MD <b>1.44 lower</b><br>(3.74 lower to 0.86 higher)  |
| <b>WOMAC function (0-68, lower score indicates improved function)</b> |                      |                      |             |                      |      |                  |                     |     |   |   |                                                      |
| 29<br>(1 RCT)                                                         | serious <sup>a</sup> | not serious          | not serious | serious <sup>b</sup> | none | ⊕⊕○○<br>LOW      | 14                  | 15  | - | - | MD <b>6.05 lower</b><br>(14.05 lower to 1.95 higher) |
| <b>6-min walk test (higher numbers indicate improvement)</b>          |                      |                      |             |                      |      |                  |                     |     |   |   |                                                      |
| 319<br>(2 RCTs)                                                       | serious <sup>a</sup> | serious <sup>c</sup> | not serious | serious <sup>d</sup> | none | ⊕○○○<br>VERY LOW | 158                 | 161 | - | - | SMD <b>0.11 lower</b><br>(1.01 lower to 0.8 higher)  |
| <b>30-sec chair stand (higher score indicates improvement)</b>        |                      |                      |             |                      |      |                  |                     |     |   |   |                                                      |
| 29<br>(1 RCT)                                                         | serious <sup>a</sup> | not serious          | not serious | serious <sup>b</sup> | none | ⊕⊕○○<br>LOW      | 14                  | 15  | - | - | MD <b>1.06 lower</b><br>(3.76 lower to 1.64 higher)  |
| <b>Timed Stair Climbing (lower score indicates improvement)</b>       |                      |                      |             |                      |      |                  |                     |     |   |   |                                                      |

| Table 1. Strength training compared to Aerobic exercise for Knee OA |                      |             |             |             |      |                     |     |     |   |   |                                                     |
|---------------------------------------------------------------------|----------------------|-------------|-------------|-------------|------|---------------------|-----|-----|---|---|-----------------------------------------------------|
| Certainty assessment                                                |                      |             |             |             |      | Summary of findings |     |     |   |   |                                                     |
| 290<br>(1 RCT)                                                      | serious <sup>a</sup> | not serious | not serious | not serious | none | ⊕⊕⊕○<br>MODERATE    | 144 | 146 | - | - | MD <b>0.5 higher</b><br>(0.61 lower to 1.61 higher) |

CI: Confidence interval; MD: Mean difference; SMD: Standardized mean difference

### Explanations

- a. Randomization and blinding not well described
- b. Single study with small sample size and wide CI that crosses line of no effect
- c. Studies on opposite sides of the no effect line
- d. Wide CI

| Table 2. Strength training compared to Aerobic exercise for Hip OA |              |               |              |             |                  |                               |                                  |                        |                          |                                       |                                        |
|--------------------------------------------------------------------|--------------|---------------|--------------|-------------|------------------|-------------------------------|----------------------------------|------------------------|--------------------------|---------------------------------------|----------------------------------------|
| Certainty assessment                                               |              |               |              |             |                  | Summary of findings           |                                  |                        |                          |                                       |                                        |
| Nº of participants (studies)<br>Follow-up                          | Risk of bias | Inconsistency | Indirectness | Imprecision | Publication bias | Overall certainty of evidence | Number of participants           |                        | Relative effect (95% CI) | Anticipated absolute effects          |                                        |
|                                                                    |              |               |              |             |                  |                               | With Aerobic exercise for Hip OA | With Strength training |                          | Risk with Aerobic exercise for Hip OA | Risk difference with Strength training |
| <b>WOMAC Pain (0-20, lower scores indicate improvement)</b>        |              |               |              |             |                  |                               |                                  |                        |                          |                                       |                                        |

**Table 2. Strength training compared to Aerobic exercise for Hip OA**

| <b>Certainty assessment</b>                                     |                      |             |             |             |      |                  |    |    |   |   |                                                       | <b>Summary of findings</b> |  |  |  |
|-----------------------------------------------------------------|----------------------|-------------|-------------|-------------|------|------------------|----|----|---|---|-------------------------------------------------------|----------------------------|--|--|--|
| 100<br>(1 RCT)                                                  | serious <sup>a</sup> | not serious | not serious | not serious | none | ⊕⊕⊕○<br>MODERATE | 50 | 50 | - | - | MD <b>0.2 higher</b><br>(1.1 lower to 1.5 higher)     |                            |  |  |  |
| <b>WOMAC function (0-68, lower scores indicate improvement)</b> |                      |             |             |             |      |                  |    |    |   |   |                                                       |                            |  |  |  |
| 100<br>(1 RCT)                                                  | serious <sup>a</sup> | not serious | not serious | not serious | none | ⊕⊕⊕○<br>MODERATE | 50 | 50 | - | - | MD <b>1 lower</b><br>(6.27 lower to 4.27 higher)      |                            |  |  |  |
| <b>Chair stand test (higher scores indicate improvement)</b>    |                      |             |             |             |      |                  |    |    |   |   |                                                       |                            |  |  |  |
| 100<br>(1 RCT)                                                  | serious <sup>a</sup> | not serious | not serious | not serious | none | ⊕⊕⊕○<br>MODERATE | 50 | 50 | - | - | MD <b>1.1 lower</b><br>(2.38 lower to 0.18 higher)    |                            |  |  |  |
| <b>Stair climbing (higher scores indicate improvement)</b>      |                      |             |             |             |      |                  |    |    |   |   |                                                       |                            |  |  |  |
| 100<br>(1 RCT)                                                  | serious <sup>a</sup> | not serious | not serious | not serious | none | ⊕⊕⊕○<br>MODERATE | 50 | 50 | - | - | MD <b>1.1 lower</b><br>(to 2.24 lower to 0.04 higher) |                            |  |  |  |
| <b>TUG (lower scores indicate improvement)</b>                  |                      |             |             |             |      |                  |    |    |   |   |                                                       |                            |  |  |  |

**Table 2. Strength training compared to Aerobic exercise for Hip OA**

| <b>Table 2. Strength training compared to Aerobic exercise for Hip OA</b>           |                      |             |             |                      |      |                            |    |    |   |   |                                                                                 |
|-------------------------------------------------------------------------------------|----------------------|-------------|-------------|----------------------|------|----------------------------|----|----|---|---|---------------------------------------------------------------------------------|
| <b>Certainty assessment</b>                                                         |                      |             |             |                      |      | <b>Summary of findings</b> |    |    |   |   |                                                                                 |
| 100<br>(1 RCT)                                                                      | serious <sup>a</sup> | not serious | not serious | serious <sup>b</sup> | none | ⊕⊕○○<br>LOW                | 50 | 50 | - | - | MD <b>0.6 higher</b><br>(0.19 lower to 1.39 higher)                             |
| <b>6-min Walk Test (higher scores indicate improvement)</b>                         |                      |             |             |                      |      |                            |    |    |   |   |                                                                                 |
| 100<br>(1 RCT)                                                                      | serious <sup>a</sup> | not serious | not serious | not serious          | none | ⊕⊕⊕○<br>MODERATE           | 50 | 50 | - | - | MD <b>39 lower</b><br>(15.98 lower to 62.02 lower)<br><br><b>Favors aerobic</b> |
| <b>WOMAC Pain - 8-month follow up (0-20, lower scores indicate improvement)</b>     |                      |             |             |                      |      |                            |    |    |   |   |                                                                                 |
| 100<br>(1 RCT)                                                                      | serious <sup>a</sup> | not serious | not serious | not serious          | none | ⊕⊕⊕○<br>MODERATE           | 50 | 50 | - | - | MD <b>1.15 higher</b><br>(0.34 lower to 2.64 higher)                            |
| <b>WOMAC function - 8-month follow up (0-68, lower scores indicate improvement)</b> |                      |             |             |                      |      |                            |    |    |   |   |                                                                                 |
| 100<br>(1 RCT)                                                                      | serious <sup>a</sup> | not serious | not serious | serious <sup>b</sup> | none | ⊕⊕○○<br>LOW                | 50 | 50 | - | - | MD <b>4.5 higher</b><br>(1.37 lower to 10.37 higher)                            |

**Table 2. Strength training compared to Aerobic exercise for Hip OA**

| Certainty assessment                                                             |                      |             |             |                      |      | Summary of findings |    |    |   |   |                                                                                |
|----------------------------------------------------------------------------------|----------------------|-------------|-------------|----------------------|------|---------------------|----|----|---|---|--------------------------------------------------------------------------------|
| <b>Chair stand test - 8-month follow up (higher scores indicate improvement)</b> |                      |             |             |                      |      |                     |    |    |   |   |                                                                                |
| 100<br>(1 RCT)                                                                   | serious <sup>a</sup> | not serious | not serious | serious <sup>b</sup> | none | ⊕⊕○○<br>LOW         | 50 | 50 | - | - | MD <b>1.4 lower</b><br>(3.13 lower to 0.33 higher)                             |
| <b>Stair climbing - 8-month follow up (higher scores indicate improvement)</b>   |                      |             |             |                      |      |                     |    |    |   |   |                                                                                |
| 100<br>(1 RCT)                                                                   | serious <sup>a</sup> | not serious | not serious | serious <sup>b</sup> | none | ⊕⊕○○<br>LOW         | 50 | 50 | - | - | MD <b>1.5 lower</b><br>(3.12 lower to 0.12 higher)                             |
| <b>TUG - 8-month follow up (lower scores indicate improvement)</b>               |                      |             |             |                      |      |                     |    |    |   |   |                                                                                |
| 100<br>(1 RCT)                                                                   | serious <sup>a</sup> | not serious | not serious | not serious          | none | ⊕⊕⊕○<br>MODERATE    | 50 | 50 | - | - | MD <b>0.7 lower</b><br>(0.01 lower to 1.39 lower)<br><br><b>Favors aerobic</b> |
| <b>6-min Walk Test - 8-month follow up (higher scores indicate improvement)</b>  |                      |             |             |                      |      |                     |    |    |   |   |                                                                                |



**Table 2. Strength training compared to Aerobic exercise for Hip OA**

| Certainty assessment |                      |             |             |             |      |                  | Summary of findings |    |   |   |                                                                                  |
|----------------------|----------------------|-------------|-------------|-------------|------|------------------|---------------------|----|---|---|----------------------------------------------------------------------------------|
| 100<br>(1 RCT)       | serious <sup>a</sup> | not serious | not serious | not serious | none | ⊕⊕⊕○<br>MODERATE | 50                  | 50 | - | - | MD <b>70 lower</b><br>(25.52 lower to 114.48 lower)<br><br><b>Favors aerobic</b> |

CI: Confidence interval; MD: Mean difference

**Explanations**

- a. Participants not blinded; outcome assessor was blinded
- b. Wide CI

**References**

1. Samut G, Dincer F, Ozdemir O. The effect of isokinetic and aerobic exercises on serum interleukin-6 and tumor necrosis factor alpha levels, pain, and functional activity in patients with knee osteoarthritis. *Mod Rheumatol*. 2015;25(6):919-924.
2. Ettinger WH, Jr., Burns R, Messier SP, et al. A randomized trial comparing aerobic exercise and resistance exercise with a health education program in older adults with knee osteoarthritis. The Fitness Arthritis and Seniors Trial (FAST). *JAMA*. 1997;277(1):25-31.
3. Bieler T, Siersma V, Magnusson SP, Kjaer M, Christensen HE, Beyer N. In hip osteoarthritis, Nordic Walking is superior to strength training and home-based exercise for improving function. *Scand J Med Sci Sports*. 2017;27(8):873-886.

**PICO 8. Neuromuscular training plus usual care compared to aerobic exercise plus usual care**

Summary. The literature searches did not identify any studies that addressed this comparison.

Quality of evidence across all critical outcomes: Very low

**PICO 9: Aquatic exercise (+usual care) vs. Aerobic (+usual care) for people with knee and/or hip OA.**

Summary: Three studies<sup>1-3</sup> compared aquatic exercise to aerobic exercise for adults with predominately knee OA, while one RCT<sup>4</sup> evaluated these exercise programs in adults with knee or hip OA who were preparing for TKA or THA. Generally, the interventions resulted in no difference in pain, self-reported function, and performance-based function; however, the findings were imprecise as the confidence intervals were wide. The quality of evidence was low, due to wide confidence intervals and lack of blinding for the participants.

Quality of evidence across all critical outcomes: Low

| <b>Table 1. Aquatic compared to Aerobic (land) for knee OA</b>    |                        |                      |                     |                      |                         |                                      |                                        |                     |                                 |                                             |                                                      |
|-------------------------------------------------------------------|------------------------|----------------------|---------------------|----------------------|-------------------------|--------------------------------------|----------------------------------------|---------------------|---------------------------------|---------------------------------------------|------------------------------------------------------|
| <b>Certainty assessment</b>                                       |                        |                      |                     |                      |                         |                                      | <b>Summary of findings</b>             |                     |                                 |                                             |                                                      |
| <b>Nº of participants (studies) Follow-up</b>                     | <b>Risk of bias</b>    | <b>Inconsistency</b> | <b>Indirectness</b> | <b>Imprecision</b>   | <b>Publication bias</b> | <b>Overall certainty of evidence</b> | <b>Number of subjects</b>              |                     | <b>Relative effect (95% CI)</b> | <b>Anticipated absolute effects</b>         |                                                      |
|                                                                   |                        |                      |                     |                      |                         |                                      | <b>With Aerobic (land) for knee OA</b> | <b>With Aquatic</b> |                                 | <b>Risk with Aerobic (land) for knee OA</b> | <b>Risk difference with Aquatic</b>                  |
| <b>Pain (lower scores indicate improvement)</b>                   |                        |                      |                     |                      |                         |                                      |                                        |                     |                                 |                                             |                                                      |
| 100<br>(2 RCTs) <sup>c</sup>                                      | serious <sub>a,b</sub> | not serious          | not serious         | serious <sup>d</sup> | none                    | ⊕⊕○○<br>LOW                          | 50                                     | 50                  | -                               | -                                           | SMD <b>0.21 higher</b><br>(0.19 lower to 0.6 higher) |
| <b>Self-reported Function (lower scores indicate improvement)</b> |                        |                      |                     |                      |                         |                                      |                                        |                     |                                 |                                             |                                                      |
| 146<br>(3 RCTs) <sup>e</sup>                                      | serious <sub>a,b</sub> | not serious          | not serious         | serious <sup>d</sup> | none                    | ⊕⊕○○<br>LOW                          | 72                                     | 74                  | -                               | -                                           | SMD <b>0.1 higher</b><br>(0.3 lower to 0.51 higher)  |
| <b>6-min walk test (higher scores indicate improvement)</b>       |                        |                      |                     |                      |                         |                                      |                                        |                     |                                 |                                             |                                                      |

**Table 1. Aquatic compared to Aerobic (land) for knee OA**

| Certainty assessment |                        |             |             |                      |      |             | Summary of findings |    |   |   |                                                      |
|----------------------|------------------------|-------------|-------------|----------------------|------|-------------|---------------------|----|---|---|------------------------------------------------------|
| 100<br>(2 RCTs)      | serious <sub>a,b</sub> | not serious | not serious | serious <sup>d</sup> | none | ⊕⊕○○<br>LOW | 50                  | 50 | - | - | SMD <b>0.08 lower</b><br>(0.47 lower to 0.31 higher) |

CI: Confidence interval; SMD: Standardized mean difference

**Explanations**

- a. Participants and personnel not blinded; outcome assessors were blinded
- b. Personnel providing treatment not blinded
- c. Alkatan reported WOMAC pain; Wang reported KOOS pain.
- d. Wide CI
- e. Alkatan reported WOMAC function; Lim reported SF-36 PCS; Wang reported KOOS function.

**Table 2. Aquatic compared to Aerobic (land) for knee AND hip OA**

| Certainty assessment                                    |              |               |              |             |                  |                               | Summary of findings                     |              |                          |                                              |                              |
|---------------------------------------------------------|--------------|---------------|--------------|-------------|------------------|-------------------------------|-----------------------------------------|--------------|--------------------------|----------------------------------------------|------------------------------|
| No of participants (studies) Follow-up                  | Risk of bias | Inconsistency | Indirectness | Imprecision | Publication bias | Overall certainty of evidence | Study event rates (%)                   |              | Relative effect (95% CI) | Anticipated absolute effects                 |                              |
|                                                         |              |               |              |             |                  |                               | With Aerobic (land) for knee AND hip OA | With Aquatic |                          | Risk with Aerobic (land) for knee AND hip OA | Risk difference with Aquatic |
| <b>Pain (WOMAC) (lower scores indicate improvement)</b> |              |               |              |             |                  |                               |                                         |              |                          |                                              |                              |

**Table 2. Aquatic compared to Aerobic (land) for knee AND hip OA**

| Certainty assessment                                                      |                        |             |             |                      |      |             | Summary of findings |    |   |   |                                                       |
|---------------------------------------------------------------------------|------------------------|-------------|-------------|----------------------|------|-------------|---------------------|----|---|---|-------------------------------------------------------|
| 66<br>(1 RCT)                                                             | serious <sub>a,b</sub> | not serious | not serious | serious <sup>c</sup> | none | ⊕⊕○○<br>LOW | 34                  | 32 | - | - | SMD <b>0.1 higher</b><br>(0.38 lower to 0.59 higher)  |
| <b>Self-reported function (WOMAC) (lower scores indicate improvement)</b> |                        |             |             |                      |      |             |                     |    |   |   |                                                       |
| 66<br>(1 RCT)                                                             | serious <sub>a,b</sub> | not serious | not serious | serious <sup>c</sup> | none | ⊕⊕○○<br>LOW | 34                  | 32 | - | - | SMD <b>0.03 higher</b><br>(0.45 lower to 0.52 higher) |
| <b>30-sec Chair Stand</b>                                                 |                        |             |             |                      |      |             |                     |    |   |   |                                                       |
| 65<br>(1 RCT)                                                             | serious <sub>a,b</sub> | not serious | not serious | serious <sup>c</sup> | none | ⊕⊕○○<br>LOW | 34                  | 31 | - | - | SMD <b>0.33 lower</b><br>(0.83 lower to 0.16 higher)  |

**CI:** Confidence interval; **SMD:** Standardised mean difference

**Explanations**

- a. Participants were not blinded; outcome assessor was blinded
- b. Participants were charged for each session.
- c. Single study, small sample size

**References**

1. Alkatan M, Baker JR, Machin DR, et al. Improved Function and Reduced Pain after Swimming and Cycling Training in Patients with Osteoarthritis. *J Rheumatol.* 2016;43(3):666-672.

2. Lim JY, Tchai E, Jang SN. Effectiveness of aquatic exercise for obese patients with knee osteoarthritis: a randomized controlled trial. *PM R*. 2010;2(8):723-731; quiz 793.
3. Wang TJ, Lee SC, Liang SY, Tung HH, Wu SF, Lin YP. Comparing the efficacy of aquatic exercises and land-based exercises for patients with knee osteoarthritis. *J Clin Nurs*. 2011;20(17-18):2609-2622.
4. Gill SD, McBurney H, Schulz DL. Land-based versus pool-based exercise for people awaiting joint replacement surgery of the hip or knee: results of a randomized controlled trial. *Arch Phys Med Rehabil*. 2009;90(3):388-394.

**PICO 10. Balance training plus usual care compared to aerobic exercise plus usual care for patients with knee and/or hip OA**

Summary. The literature searches did not identify any studies that addressed this comparison.

Quality of evidence across all critical outcomes: Very low

**PICO 11. Daily walking plus usual care compared to aerobic exercise plus usual care for patients with knee and/or hip OA**

Summary. The literature searches did not identify any studies that addressed this comparison.

Quality of evidence across all critical outcomes: Very low

**PICO 12: Neuromuscular training compared to strengthening for knee/hip OA**

Summary: The literature search identified three RCTs<sup>[1]</sup> that compared neuromuscular training to strength training in the treatment of knee OA. There were two types of neuromuscular training that were evaluated. Specifically, Bennell et al.<sup>[1]</sup> compared neuromuscular training, which included balance and functional strengthening exercises, to quadriceps strengthening for men and women with knee OA and varus alignment. With moderate certainty, they observed no differences in improvement between groups for pain, self-reported function, and performance-based function (stair climbing test, chair stand test, gait speed). They also observed no difference in the odds of reporting increased knee pain, however the certainty of this outcome is low due to a wide confidence interval. Avelar<sup>[2]</sup> et al. and Bokaeian<sup>[3]</sup> et al. compared whole body vibration training to strength training for adults with knee OA. They also report no difference in pain, self-reported function and performance-based function between groups; however, the level of evidence is low due to small sample size, wide confidence intervals, and a single study for most outcomes.

Quality of evidence across all critical outcomes: Low

| <b>Table 1. Neuromuscular training (balance/functional strength) vs. Quad strengthening for knee OA</b> |                      |                      |                     |                    |                         |                                      |                                                     |                                                                  |                                 |                                     |                                                                                  |
|---------------------------------------------------------------------------------------------------------|----------------------|----------------------|---------------------|--------------------|-------------------------|--------------------------------------|-----------------------------------------------------|------------------------------------------------------------------|---------------------------------|-------------------------------------|----------------------------------------------------------------------------------|
| <b>Certainty assessment</b>                                                                             |                      |                      |                     |                    |                         |                                      | <b>Summary of findings</b>                          |                                                                  |                                 |                                     |                                                                                  |
| <b>Nº of participants (studies) Follow-up</b>                                                           | <b>Risk of bias</b>  | <b>Inconsistency</b> | <b>Indirectness</b> | <b>Imprecision</b> | <b>Publication bias</b> | <b>Overall certainty of evidence</b> | <b>Number of participants/Study event rates (%)</b> |                                                                  | <b>Relative effect (95% CI)</b> | <b>Anticipated absolute effects</b> |                                                                                  |
|                                                                                                         |                      |                      |                     |                    |                         |                                      | <b>With Strengthening</b>                           | <b>With Neuromuscular training (balance/functional strength)</b> |                                 | <b>Risk with Strengthening</b>      | <b>Risk difference with Neuromuscular training (balance/functional strength)</b> |
| <b>WOMAC Pain (0-20, lower scores indicate improvement)</b>                                             |                      |                      |                     |                    |                         |                                      |                                                     |                                                                  |                                 |                                     |                                                                                  |
| 82 (1 RCT)                                                                                              | serious <sup>a</sup> | not serious          | not serious         | not serious        | none                    | ⊕⊕⊕<br>○<br>MODERATE                 | 44                                                  | 38                                                               | -                               | -                                   | MD <b>0.7 higher</b><br>(0.4 lower to 1.8 higher)                                |
| <b>WOMAC function (0-68, lower scores indicate improvement)</b>                                         |                      |                      |                     |                    |                         |                                      |                                                     |                                                                  |                                 |                                     |                                                                                  |
| 82 (1 RCT)                                                                                              | serious <sup>a</sup> | not serious          | not serious         | not serious        | none                    | ⊕⊕⊕<br>○<br>MODERATE                 | 44                                                  | 38                                                               | -                               | -                                   | MD <b>0.2 lower</b><br>(3.63 lower to 3.23 higher)                               |
| <b>Timed Stair Climb (lower scores indicate improvement)</b>                                            |                      |                      |                     |                    |                         |                                      |                                                     |                                                                  |                                 |                                     |                                                                                  |
| 82 (1 RCT)                                                                                              | serious <sup>a</sup> | not serious          | not serious         | not serious        | none                    | ⊕⊕⊕<br>○<br>MODERATE                 | 44                                                  | 38                                                               | -                               | -                                   | MD <b>0.02 higher</b><br>(0.68 lower to 0.72 higher)                             |

| <b>Table 1. Neuromuscular training (balance/functional strength) vs. Quad strengthening for knee OA</b> |                      |             |             |                      |      |                            |                  |               |                                  |               |                                                     |
|---------------------------------------------------------------------------------------------------------|----------------------|-------------|-------------|----------------------|------|----------------------------|------------------|---------------|----------------------------------|---------------|-----------------------------------------------------|
| <b>Certainty assessment</b>                                                                             |                      |             |             |                      |      | <b>Summary of findings</b> |                  |               |                                  |               |                                                     |
| <b>30 sec Chair Stand (higher scores indicate improvement)</b>                                          |                      |             |             |                      |      |                            |                  |               |                                  |               |                                                     |
| 82<br>(1 RCT)                                                                                           | serious <sup>a</sup> | not serious | not serious | not serious          | none | ⊕⊕⊕<br>○<br>MODERATE       | 44               | 38            | -                                | -             | MD <b>0.1 higher</b><br>(0.66 lower to 0.86 higher) |
| <b>Gait speed (higher scores indicate improvement)</b>                                                  |                      |             |             |                      |      |                            |                  |               |                                  |               |                                                     |
| 82<br>(1 RCT)                                                                                           | serious <sup>a</sup> | not serious | not serious | not serious          | none | ⊕⊕⊕<br>○<br>MODERATE       | 44               | 38            | -                                | -             | MD <b>0.01 lower</b><br>(0.06 lower to 0.04 higher) |
| <b>Safety (increased knee pain)</b>                                                                     |                      |             |             |                      |      |                            |                  |               |                                  |               |                                                     |
| 90<br>(1 RCT)                                                                                           | serious <sup>a</sup> | not serious | not serious | serious <sup>b</sup> | none | ⊕⊕○<br>○<br>LOW            | 10/44<br>(22.7%) | 14/46 (30.4%) | <b>OR 1.49</b><br>(0.58 to 3.82) | 227 per 1,000 | <b>77 more per 1,000</b><br>(82 fewer to 302 more)  |

**CI:** Confidence interval; **MD:** Mean difference; **OR:** Odds ratio

### Explanations

a. Participants not blinded; outcome assessor was blinded

b. Wide CI

**Table 2. Neuromuscular (whole body vibration) compared to Strength training for knee OA**

| Certainty assessment                                                             |                        |               |              |                      |                  |                               | Summary of findings                |                                           |                          |                                         |                                                           |
|----------------------------------------------------------------------------------|------------------------|---------------|--------------|----------------------|------------------|-------------------------------|------------------------------------|-------------------------------------------|--------------------------|-----------------------------------------|-----------------------------------------------------------|
| Nº of participants (studies) Follow-up                                           | Risk of bias           | Inconsistency | Indirectness | Imprecision          | Publication bias | Overall certainty of evidence | Number of participants             |                                           | Relative effect (95% CI) | Anticipated absolute effects            |                                                           |
|                                                                                  |                        |               |              |                      |                  |                               | With Strength training for knee OA | With Neuromuscular (whole body vibration) |                          | Risk with Strength training for knee OA | Risk difference with Neuromuscular (whole body vibration) |
| <b>Pain (lower scores indicate improvement)</b>                                  |                        |               |              |                      |                  |                               |                                    |                                           |                          |                                         |                                                           |
| 47 (2 RCTs)                                                                      | serious <sup>a,b</sup> | not serious   | not serious  | serious <sup>c</sup> | none             | ⊕⊕○<br>○<br>LOW               | 21                                 | 26                                        | -                        | -                                       | SMD <b>0.33 lower</b><br>(0.91 lower to 0.26 higher)      |
| <b>Self-reported Function, WOMAC (0-1700, lower scores indicate improvement)</b> |                        |               |              |                      |                  |                               |                                    |                                           |                          |                                         |                                                           |
| 21 (1 RCT)                                                                       | serious <sup>b</sup>   | not serious   | not serious  | serious <sup>d</sup> | none             | ⊕⊕○<br>○<br>LOW               | 10                                 | 11                                        | -                        | -                                       | MD <b>36 lower</b><br>(339.69 lower to 267.69 higher)     |
| <b>TUG (lower scores indicate improvement)</b>                                   |                        |               |              |                      |                  |                               |                                    |                                           |                          |                                         |                                                           |
| 21 (1 RCT)                                                                       | serious <sup>b</sup>   | not serious   | not serious  | serious <sup>d</sup> | none             | ⊕⊕○<br>○<br>LOW               | 10                                 | 11                                        | -                        | -                                       | MD <b>0.02 higher</b><br>(0.93 lower to 0.97 higher)      |
| <b>30 sec Chair Stand (higher scores indicate improvement)</b>                   |                        |               |              |                      |                  |                               |                                    |                                           |                          |                                         |                                                           |



| <b>Table 2. Neuromuscular (whole body vibration) compared to Strength training for knee OA</b> |                      |             |             |                      |      |                 |                            |    |   |   |                                                         |
|------------------------------------------------------------------------------------------------|----------------------|-------------|-------------|----------------------|------|-----------------|----------------------------|----|---|---|---------------------------------------------------------|
| <b>Certainty assessment</b>                                                                    |                      |             |             |                      |      |                 | <b>Summary of findings</b> |    |   |   |                                                         |
| 21<br>(1 RCT)                                                                                  | serious <sup>b</sup> | not serious | not serious | serious <sup>d</sup> | none | ⊕⊕○<br>○<br>LOW | 10                         | 11 | - | - | MD <b>0</b><br>(2.78 lower to<br>2.78 higher)           |
| <b>6-meter Walk Test (higher scores indicate improvement)</b>                                  |                      |             |             |                      |      |                 |                            |    |   |   |                                                         |
| 21<br>(1 RCT)                                                                                  | serious <sup>b</sup> | not serious | not serious | serious <sup>d</sup> | none | ⊕⊕○<br>○<br>LOW | 10                         | 11 | - | - | MD <b>0.47 lower</b><br>(53.36 lower to<br>54.3 higher) |

**CI:** Confidence interval; **SMD:** Standardised mean difference; **MD:** Mean difference

### Explanations

- a. Participants not blinded; outcome assessor was blinded in at least 1 study
- b. Blinding not well described
- c. Wide CI
- d. Single study, small sample size

### References

1. Bennell KL, Kyriakides M, Metcalf B, Egerton T, Wrigley TV, Hodges PW, et al. Neuromuscular versus quadriceps strengthening exercise in patients with medial knee osteoarthritis and varus malalignment: a randomized controlled trial. *Arthritis Rheumatol.* 2014;66(4):950-959.
2. Avelar NC, Simao AP, Tossige-Gomes R, Neves CD, Rocha-Vieira E, Coimbra CC, et al. The effect of adding whole-body vibration to squat training on the functional performance and self-report of disease status in elderly patients with knee osteoarthritis: a randomized, controlled clinical study. *J Altern Complement Med.* 2011;17(12):1149-1155.
3. Bokaeian HR, Bakhtiary AH, Mirmohammadkhani M, Moghimi J. The effect of adding whole body vibration training to strengthening training in the treatment of knee osteoarthritis: A randomized clinical trial. *J Bodyw Mov Ther.* 2016;20(2):334-340.

**PICO 13: Aquatic exercise (+usual care) vs. strength training (+usual care) for people with knee and/or hip OA.**

Summary: The literature search identified 5 RCTs to evaluate this PICO question. Four RCTs<sup>1-4</sup> were conducted in adults with knee OA and one RCT<sup>5</sup> was conducted in adults with knee or hip OA who were preparing for TKA or THA. All studies compared an aquatic exercise program to a land-based program that included, but was not limited to, strength training. For four studies<sup>1,2,4,5</sup>, interventions were conducted in a range of 40-60 minutes, 2-3 time per week for 6-8 weeks. For Silva et al.<sup>3</sup>, the intervention duration was 18 weeks. Lund et al.<sup>2</sup> observed that those in the strength training group had greater improvements in pain (KOOS Pain) than the aquatic exercise group in people with knee OA. Conversely, Wyatt et al.<sup>4</sup> and Silva et al.<sup>3</sup> observed that pain improvements may be greater in the aquatic exercise group, but these findings were imprecise with wide confidence intervals in people with knee OA. The comparison of self-reported function, performance-based function, and safety (increased pain) were inconclusive, as the confidence intervals were wide. The quality of evidence to evaluate the PICO question was very low, due primarily to small sample sizes, low study numbers, and wide confidence intervals.

Quality of evidence across all critical outcomes: Very low

| <b>Table 1. Aquatic compared to Strength (land) for knee OA</b> |                     |                      |                     |                    |                         |                                      |                                         |                     |                                 |                                              |                                     |
|-----------------------------------------------------------------|---------------------|----------------------|---------------------|--------------------|-------------------------|--------------------------------------|-----------------------------------------|---------------------|---------------------------------|----------------------------------------------|-------------------------------------|
| <b>Certainty assessment</b>                                     |                     |                      |                     |                    |                         |                                      | <b>Summary of findings</b>              |                     |                                 |                                              |                                     |
| <b>Nº of participants (studies) Follow-up</b>                   | <b>Risk of bias</b> | <b>Inconsistency</b> | <b>Indirectness</b> | <b>Imprecision</b> | <b>Publication bias</b> | <b>Overall certainty of evidence</b> | <b>Number of patients</b>               |                     | <b>Relative effect (95% CI)</b> | <b>Anticipated absolute effects</b>          |                                     |
|                                                                 |                     |                      |                     |                    |                         |                                      | <b>With Strength (land) for knee OA</b> | <b>With Aquatic</b> |                                 | <b>Risk with Strength (land) for knee OA</b> | <b>Risk difference with Aquatic</b> |
| <b>Pain – KOOS (0-100, higher scores indicate improvement)</b>  |                     |                      |                     |                    |                         |                                      |                                         |                     |                                 |                                              |                                     |

**Table 1. Aquatic compared to Strength (land) for knee OA**

| Certainty assessment                                              |                        |                      |             |                        |      |                  | Summary of findings |    |   |   |                                                                                       |
|-------------------------------------------------------------------|------------------------|----------------------|-------------|------------------------|------|------------------|---------------------|----|---|---|---------------------------------------------------------------------------------------|
| 52<br>(1 RCT)                                                     | serious <sup>a</sup>   | not serious          | not serious | not serious            | none | ⊕⊕⊕○<br>MODERATE | 25                  | 27 | - | - | MD <b>8 lower</b><br>(0.45 lower to 15.55 lower)<br><br><b>Favors strength (land)</b> |
| <b>Pain – VAS (lower scores indicate improvement)</b>             |                        |                      |             |                        |      |                  |                     |    |   |   |                                                                                       |
| 110<br>(2 RCTs)                                                   | serious <sup>a,b</sup> | serious <sup>c</sup> | not serious | serious <sup>d</sup>   | none | ⊕○○○<br>VERY LOW | 55                  | 55 | - | - | SMD <b>0.51 lower</b><br>(1.15 lower to 0.13 higher)                                  |
| <b>Self-reported Function (lower scores indicate improvement)</b> |                        |                      |             |                        |      |                  |                     |    |   |   |                                                                                       |
| 98<br>(2 RCTs)                                                    | serious <sup>a</sup>   | not serious          | not serious | serious <sup>d,f</sup> | none | ⊕⊕○○<br>LOW      | 47                  | 51 | - | - | SMD <b>0.29 lower</b><br>(0.69 lower to 0.11 higher)                                  |
| <b>Safety: Increased pain</b>                                     |                        |                      |             |                        |      |                  |                     |    |   |   |                                                                                       |

**Table 1. Aquatic compared to Strength (land) for knee OA**

| Certainty assessment |                      |             |             |                      |      |             | Summary of findings |                 |                                  |               |                                                      |
|----------------------|----------------------|-------------|-------------|----------------------|------|-------------|---------------------|-----------------|----------------------------------|---------------|------------------------------------------------------|
| 52<br>(1 RCT)        | serious <sup>a</sup> | not serious | not serious | serious <sup>f</sup> | none | ⊕⊕○○<br>LOW | 8/25<br>(32.0%)     | 3/27<br>(11.1%) | <b>OR 0.27</b><br>(0.06 to 1.15) | 320 per 1,000 | <b>207 fewer per 1,000</b><br>(293 fewer to 31 more) |

CI: Confidence interval; SMD: Standardised mean difference; MD: Mean difference; OR: Odds ratio

**Explanations**

- a. Participants not blinded to group assignment; outcome assessors were blinded
- b. Randomization method not specified for one study and allocation methods not specified for both studies
- c. I squared = 63%; one study does not cross 0, and the other study does cross 0
- d. Crosses the no effect line
- e. Single study, small sample size
- f. Wide CI

**Table 2. Aquatic compared to Strength (land) for knee AND hip OA**

| Certainty assessment                                        |              |               |              |             |                  |                               | Summary of findings                      |              |                          |                                               |                              |
|-------------------------------------------------------------|--------------|---------------|--------------|-------------|------------------|-------------------------------|------------------------------------------|--------------|--------------------------|-----------------------------------------------|------------------------------|
| Nº of participants (studies) Follow-up                      | Risk of bias | Inconsistency | Indirectness | Imprecision | Publication bias | Overall certainty of evidence | Number of patients                       |              | Relative effect (95% CI) | Anticipated absolute effects                  |                              |
|                                                             |              |               |              |             |                  |                               | With Strength (land) for knee AND hip OA | With Aquatic |                          | Risk with Strength (land) for knee AND hip OA | Risk difference with Aquatic |
| <b>WOMAC Pain (0-20, lower scores indicate improvement)</b> |              |               |              |             |                  |                               |                                          |              |                          |                                               |                              |

**Table 2. Aquatic compared to Strength (land) for knee AND hip OA**

| Certainty assessment                                            |                        |             |             |                      |      |             | Summary of findings |    |   |   |                                                     |
|-----------------------------------------------------------------|------------------------|-------------|-------------|----------------------|------|-------------|---------------------|----|---|---|-----------------------------------------------------|
| 66<br>(1 RCT)                                                   | serious <sub>a,b</sub> | not serious | not serious | serious <sup>c</sup> | none | ⊕⊕○○<br>LOW | 34                  | 32 | - | - | MD <b>0.3 higher</b><br>(1.11 lower to 1.71 higher) |
| <b>WOMAC function (0-68, lower scores indicate improvement)</b> |                        |             |             |                      |      |             |                     |    |   |   |                                                     |
| 66<br>(1 RCT)                                                   | serious <sub>a,b</sub> | not serious | not serious | serious <sup>c</sup> | none | ⊕⊕○○<br>LOW | 34                  | 32 | - | - | MD <b>0.4 higher</b><br>(5.18 lower to 5.98 higher) |
| <b>30-sec Chair Stand (higher scores indicate improvement)</b>  |                        |             |             |                      |      |             |                     |    |   |   |                                                     |
| 65<br>(1 RCT)                                                   | serious <sub>a,b</sub> | not serious | not serious | serious <sup>c</sup> | none | ⊕⊕○○<br>LOW | 34                  | 31 | - | - | MD <b>1.5 lower</b><br>(3.64 lower to 0.64 higher)  |

CI: Confidence interval; MD: Mean difference

**Explanations**

- a. Participants were not blinded; outcome assessor was blinded.
- b. Participants were charged for each session.
- c. Single study, small sample size

**References**

1. Lim JY, Tchai E, Jang SN. Effectiveness of aquatic exercise for obese patients with knee osteoarthritis: a randomized controlled trial. *PM R*. 2010;2(8):723-731; quiz 793.

2. Lund H, Weile U, Christensen R, et al. A randomized controlled trial of aquatic and land-based exercise in patients with knee osteoarthritis. *J Rehabil Med.* 2008;40(2):137-144.
3. Silva LE, Valim V, Pessanha AP, et al. Hydrotherapy versus conventional land-based exercise for the management of patients with osteoarthritis of the knee: a randomized clinical trial. *Phys Ther.* 2008;88(1):12-21.
4. Wyatt FB, Milam S, Manske RC, Deere R. The effects of aquatic and traditional exercise programs on persons with knee osteoarthritis. *J Strength Cond Res.* 2001;15(3):337-340.
5. Gill SD, McBurney H, Schulz DL. Land-based versus pool-based exercise for people awaiting joint replacement surgery of the hip or knee: results of a randomized controlled trial. *Arch Phys Med Rehabil.* 2009;90(3):388-394.

**PICO 14: Balance training compared to strength training for knee OA**

Summary: Three RCTs<sup>[1-3]</sup> compared balance/proprioceptive training to strength training for knee OA. No significant differences in pain, self-reported function, and performance based function were observed. However, all findings were inconclusive due to serious imprecision related to wide CIs and small sample size for each outcome.

Quality of evidence across all critical outcomes: Low

| <b>Balance training compared to Strength training for knee OA for Knee OA</b> |                     |                      |                     |                    |                         |                                      |                                           |                              |                                 |                                                |                                              |
|-------------------------------------------------------------------------------|---------------------|----------------------|---------------------|--------------------|-------------------------|--------------------------------------|-------------------------------------------|------------------------------|---------------------------------|------------------------------------------------|----------------------------------------------|
| <b>Certainty assessment</b>                                                   |                     |                      |                     |                    |                         |                                      | <b>Summary of findings</b>                |                              |                                 |                                                |                                              |
| <b>Nº of participants (studies) Follow-up</b>                                 | <b>Risk of bias</b> | <b>Inconsistency</b> | <b>Indirectness</b> | <b>Imprecision</b> | <b>Publication bias</b> | <b>Overall certainty of evidence</b> | <b>Number of patients</b>                 |                              | <b>Relative effect (95% CI)</b> | <b>Anticipated absolute effects</b>            |                                              |
|                                                                               |                     |                      |                     |                    |                         |                                      | <b>With Strength training for knee OA</b> | <b>With Balance training</b> |                                 | <b>Risk with Strength training for knee OA</b> | <b>Risk difference with Balance training</b> |
| <b>WOMAC pain (0-20, lower scores indicate improvement)</b>                   |                     |                      |                     |                    |                         |                                      |                                           |                              |                                 |                                                |                                              |

| <b>Balance training compared to Strength training for knee OA for Knee OA</b>  |                      |             |             |                      |      |             |                            |    |   |   |                                                      |
|--------------------------------------------------------------------------------|----------------------|-------------|-------------|----------------------|------|-------------|----------------------------|----|---|---|------------------------------------------------------|
| <b>Certainty assessment</b>                                                    |                      |             |             |                      |      |             | <b>Summary of findings</b> |    |   |   |                                                      |
| 31<br>(2 RCTs)                                                                 | serious <sup>a</sup> | not serious | not serious | serious <sup>b</sup> | none | ⊕⊕○○<br>LOW | 17                         | 14 | - | - | MD <b>0.87 higher</b><br>(1.92 lower to 3.66 higher) |
| <b>KOOS Pain (mean change) (0-100, higher scores indicate improvement)</b>     |                      |             |             |                      |      |             |                            |    |   |   |                                                      |
| 42<br>(1 RCT)                                                                  | serious <sup>a</sup> | not serious | not serious | serious <sup>b</sup> | none | ⊕⊕○○<br>LOW | 18                         | 24 | - | - | MD <b>3 lower</b><br>(11.48 lower to 5.48 higher)    |
| <b>WOMAC function (0-68, lower scores indicate improvement)</b>                |                      |             |             |                      |      |             |                            |    |   |   |                                                      |
| 28<br>(2 RCTs)                                                                 | serious <sup>a</sup> | not serious | not serious | serious <sup>b</sup> | none | ⊕⊕○○<br>LOW | 16                         | 12 | - | - | MD <b>1.25 lower</b><br>(11.87 lower to 9.38 higher) |
| <b>KOOS function (mean change) (0-100, higher scores indicate improvement)</b> |                      |             |             |                      |      |             |                            |    |   |   |                                                      |
| 42<br>(1 RCT)                                                                  | serious <sup>a</sup> | not serious | not serious | serious <sup>b</sup> | none | ⊕⊕○○<br>LOW | 18                         | 24 | - | - | MD <b>6 lower</b><br>(13.88 lower to 1.88 higher)    |
| <b>Walking time (seconds) (lower scores indicate improvement)</b>              |                      |             |             |                      |      |             |                            |    |   |   |                                                      |
| 42<br>(1 RCT)                                                                  | serious <sup>a</sup> | not serious | not serious | serious <sup>b</sup> | none | ⊕⊕○○<br>LOW | 18                         | 24 | - | - | MD <b>1 lower</b><br>(2.6 lower to 0.6 higher)       |
| <b>TUG (timed get up and go) (lower scores indicate improvement)</b>           |                      |             |             |                      |      |             |                            |    |   |   |                                                      |
| 56<br>(2 RCTs)                                                                 | serious <sup>a</sup> | not serious | not serious | serious <sup>b</sup> | none | ⊕⊕○○<br>LOW | 27                         | 29 | - | - | MD <b>0.07 lower</b><br>(1.02 lower to 0.88 higher)  |

| <b>Balance training compared to Strength training for knee OA for Knee OA</b> |                      |             |             |                      |      |                            |    |    |   |   |                                                     |
|-------------------------------------------------------------------------------|----------------------|-------------|-------------|----------------------|------|----------------------------|----|----|---|---|-----------------------------------------------------|
| <b>Certainty assessment</b>                                                   |                      |             |             |                      |      | <b>Summary of findings</b> |    |    |   |   |                                                     |
| <b>Time going up stairs (lower scores indicate improvement)</b>               |                      |             |             |                      |      |                            |    |    |   |   |                                                     |
| 56<br>(2 RCTs)                                                                | serious <sup>a</sup> | not serious | not serious | serious <sup>b</sup> | none | ⊕⊕○○<br>LOW                | 27 | 29 | - | - | MD <b>0.1 lower</b><br>(1.05 lower to 0.85 higher)  |
| <b>Time going down stairs (lower scores indicate improvement)</b>             |                      |             |             |                      |      |                            |    |    |   |   |                                                     |
| 56<br>(2 RCTs)                                                                | serious <sup>a</sup> | not serious | not serious | serious <sup>b</sup> | none | ⊕⊕○○<br>LOW                | 27 | 29 | - | - | MD <b>0.7 higher</b><br>(0.89 lower to 2.29 higher) |

**CI:** Confidence interval; **MD:** Mean difference

### Explanations

- a. Participants and/or investigators not blinded; at least 1 study blinded the outcome assessor
- b. Small sample size

### References

1. Rogers MW, Tamulevicius N, Coetsee MF, Curry BF, Semple SJ. Knee Osteoarthritis and the Efficacy of Kinesthesia, Balance & Agility Exercise Training: A Pilot Study. *Int J Exerc Sci.* 2011;4(2):124-132.
2. Rogers MW, Tamulevicius N, Semple SJ, Krkeljas Z. Efficacy of home-based kinesthesia, balance & agility exercise training among persons with symptomatic knee osteoarthritis. *J Sports Sci Med.* 2012;11(4):751-758.
3. Chaipinyo K, Karoonsupcharoen O. No difference between home-based strength training and home-based balance training on pain in patients with knee osteoarthritis: a randomised trial. *Aust J Physiother.* 2009;55(1):25-30.

**PICO 15. Daily walking plus usual care compared to strength training plus usual care**



Summary. The literature searches did not identify any studies that addressed this comparison.

Quality of evidence across all critical outcomes: Very low

**PICO 16. Aquatic exercise plus usual care compared to neuromuscular training plus usual care**

Summary. The literature searches did not identify any studies that addressed this comparison.

Quality of evidence across all critical outcomes: Very low

**PICO 17. Balance training plus usual care compared to neuromuscular training plus usual care**

Summary. The literature searches did not identify any studies that addressed this comparison.

Quality of evidence across all critical outcomes: Very low

**PICO 18. Daily walking plus usual care compared to neuromuscular training plus usual care**

Summary. The literature searches did not identify any studies that addressed this comparison.

Quality of evidence across all critical outcomes: Very low

**PICO 19: Aquatic exercise (+usual care) compared to balance exercise (+ usual care) for knee OA**

Summary: One study<sup>1</sup> compared aquatic exercises with a land-based exercise program that included balance exercises for treating knee OA. Lund et al.<sup>1</sup> observed that participants in the land-based exercise group reported greater pain improvement than those in the aquatic exercise group. Although there was no difference for self-reported function, the finding was imprecise due to wide 95% CI that includes the possibility of a difference between groups. Those in the aquatic exercise group had lower odds of reported increased pain compared to the land-based exercise group; however the confidence interval was too wide to rule out the possibility of no difference between groups.

Quality of evidence across all critical outcomes: Low

## Aquatic compared to Balance (Land) for knee OA

| Aquatic compared to Balance (Land) for knee OA                   |                      |               |              |                        |                  |                               |                                          |              |                          |                                      |                                                                                         |
|------------------------------------------------------------------|----------------------|---------------|--------------|------------------------|------------------|-------------------------------|------------------------------------------|--------------|--------------------------|--------------------------------------|-----------------------------------------------------------------------------------------|
| Certainty assessment                                             |                      |               |              |                        |                  |                               | Summary of findings                      |              |                          |                                      |                                                                                         |
| № of participants (studies)<br>Follow-up                         | Risk of bias         | Inconsistency | Indirectness | Imprecision            | Publication bias | Overall certainty of evidence | Number of subjects/Study event rates (%) |              | Relative effect (95% CI) | Anticipated absolute effects         |                                                                                         |
|                                                                  |                      |               |              |                        |                  |                               | With Balance (Land) for knee OA          | With Aquatic |                          | Risk with Balance (Land) for knee OA | Risk difference with Aquatic                                                            |
| <b>KOOS Pain (0-100, higher scores indicate improvement)</b>     |                      |               |              |                        |                  |                               |                                          |              |                          |                                      |                                                                                         |
| 52<br>(1 RCT)                                                    | serious <sup>a</sup> | not serious   | not serious  | not serious            | none             | ⊕⊕⊕○<br>MODERATE              | 25                                       | 27           | -                        | -                                    | MD <b>8 higher</b><br>(0.45 higher to 15.55 higher)<br><br><b>Favors balance (land)</b> |
| <b>KOOS Function (0-100, higher scores indicate improvement)</b> |                      |               |              |                        |                  |                               |                                          |              |                          |                                      |                                                                                         |
| 52<br>(1 RCT)                                                    | serious <sup>a</sup> | not serious   | not serious  | serious <sup>b,c</sup> | none             | ⊕⊕○○<br>LOW                   | 25                                       | 27           | -                        | -                                    | MD <b>5.5 higher</b><br>(2.3 lower to 13.3 higher)                                      |
| <b>Safety (increased knee pain)</b>                              |                      |               |              |                        |                  |                               |                                          |              |                          |                                      |                                                                                         |

| Aquatic compared to Balance (Land) for knee OA |                      |             |             |                      |      |                     |                 |                 |                                  |               |                                                      |
|------------------------------------------------|----------------------|-------------|-------------|----------------------|------|---------------------|-----------------|-----------------|----------------------------------|---------------|------------------------------------------------------|
| Certainty assessment                           |                      |             |             |                      |      | Summary of findings |                 |                 |                                  |               |                                                      |
| 52<br>(1 RCT)                                  | serious <sup>a</sup> | not serious | not serious | serious <sup>b</sup> | none | ⊕⊕○○<br>LOW         | 8/25<br>(32.0%) | 3/27<br>(11.1%) | <b>OR 0.27</b><br>(0.06 to 1.15) | 320 per 1,000 | <b>207 fewer per 1,000</b><br>(293 fewer to 31 more) |

**CI:** Confidence interval; **MD:** Mean difference; **OR:** Odds ratio

### Explanations

- a. Participants not blinded, outcome assessor was blinded
- b. Wide confidence interval
- c. Crossed no effect line

1. Lund H, Weile U, Christensen R, et al. A randomized controlled trial of aquatic and land-based exercise in patients with knee osteoarthritis. *J Rehabil Med.* 2008;40(2):137-144.

### PICO 20. Daily walking plus usual care compared to aquatic exercise plus usual care for patients with knee and/or hip OA

Summary. The literature searches did not identify any studies that addressed this comparison.

Quality of evidence across all critical outcomes: Very low

### PICO 21. Daily walking plus usual care compared to balance training plus usual care for patients with knee and/or hip OA

Summary. The literature searches did not identify any studies that addressed this comparison.

Quality of evidence across all critical outcomes: Very low

**PICO 22. Unsupervised exercise vs. supervised exercise for knee/hip OA**

Summary. The literature searches did not identify any studies that addressed this comparison.

Quality of evidence across all critical outcomes: Very low

**PICO 23: Unsupervised prescribed exercise vs. supervised exercise for knee/hip OA**

Summary: Seven RCTs<sup>[1-6]</sup>[Callaghan 1995] compared unsupervised prescribed exercise to supervised exercises for the treatment of knee OA. The pain results of four studies<sup>[1-4]</sup> were appropriate to combine in a meta-analysis, and indicated that supervised exercise reduces pain to a significantly greater extent than unsupervised exercise (Table 1). McCarthy et al.<sup>[2]</sup> observed that pain improvements were maintained at 6- and 12-month follow up. McCarthy et al.<sup>[2]</sup> also observed greater short-term improvements in self-reported function with supervised exercise compared to unsupervised exercise; however, these differences were not maintained at 6- and 12-months. Tunay et al.<sup>[3]</sup> reported greater improvement in TUG with supervised exercise. Colak et al.<sup>[4]</sup> reported no differences in the 6MWT, however the confidence intervals were wide. Three studies<sup>[5,6]</sup>[Callaghan 1995] reported mixed results that could not be used in the meta-analysis (Table 2).

Bieler et al.<sup>[7]</sup> compared unsupervised prescribed exercise to supervised aerobic exercise and to supervised strength training for the treatment of hip OA. Generally, they observed no differences in pain, self-reported function, and performance-based function (chair stand test, stair climbing, TUG) between unsupervised and supervised exercise after intervention and after an 8-month follow-up. An exception was the performance on 6MWT (Tables 3 and 4). Those in the supervised aerobic exercise group demonstrated greater improvements on the 6MWT compared to the unsupervised group, and these differences were maintained at the 8-month follow-up.

Quality of evidence across all critical outcomes: Low for knee, Moderate for hip

| <b>Table 1. Unsupervised prescribed compared to supervised exercise for knee OA</b> |                     |                      |                     |                    |                         |                                      |                                             |                                     |                                 |                                                  |                                                     |
|-------------------------------------------------------------------------------------|---------------------|----------------------|---------------------|--------------------|-------------------------|--------------------------------------|---------------------------------------------|-------------------------------------|---------------------------------|--------------------------------------------------|-----------------------------------------------------|
| <b>Certainty assessment</b>                                                         |                     |                      |                     |                    |                         |                                      | <b>Summary of findings</b>                  |                                     |                                 |                                                  |                                                     |
| <b>Nº of participants (studies) Follow-up</b>                                       | <b>Risk of bias</b> | <b>Inconsistency</b> | <b>Indirectness</b> | <b>Imprecision</b> | <b>Publication bias</b> | <b>Overall certainty of evidence</b> | <b>Number of participants</b>               |                                     | <b>Relative effect (95% CI)</b> | <b>Anticipated absolute effects</b>              |                                                     |
|                                                                                     |                     |                      |                     |                    |                         |                                      | <b>With Supervised exercise for knee OA</b> | <b>With Unsupervised prescribed</b> |                                 | <b>Risk with Supervised exercise for knee OA</b> | <b>Risk difference with Unsupervised prescribed</b> |
|                                                                                     |                     |                      |                     |                    |                         |                                      |                                             |                                     |                                 |                                                  |                                                     |

**Table 1. Unsupervised prescribed compared to supervised exercise for knee OA**

| Certainty assessment                                                  |                      |             |             |             |      | Summary of findings |     |     |   |   |                                                                                                 |
|-----------------------------------------------------------------------|----------------------|-------------|-------------|-------------|------|---------------------|-----|-----|---|---|-------------------------------------------------------------------------------------------------|
| <b>Pain (lower scores indicate improvement)</b>                       |                      |             |             |             |      |                     |     |     |   |   |                                                                                                 |
| 465<br>(4 RCTs)                                                       | serious <sup>a</sup> | not serious | not serious | not serious | none | ⊕⊕⊕○<br>MODERATE    | 254 | 211 | - | - | SMD <b>0.44 higher</b><br>(0.26 higher to 0.63 higher)<br><br><b>Favors supervised exercise</b> |
| <b>Pain - mid term follow up (lower scores indicate improvement)</b>  |                      |             |             |             |      |                     |     |     |   |   |                                                                                                 |
| 214<br>(1 RCT)                                                        | serious <sup>a</sup> | not serious | not serious | not serious | none | ⊕⊕⊕○<br>MODERATE    | 111 | 103 | - | - | SMD <b>0.29 higher</b><br>(0.02 higher to 0.56 higher)<br><br><b>Favors supervised exercise</b> |
| <b>Pain - long term follow up (lower scores indicate improvement)</b> |                      |             |             |             |      |                     |     |     |   |   |                                                                                                 |
| 214<br>(1 RCT)                                                        | serious <sup>a</sup> | not serious | not serious | not serious | none | ⊕⊕⊕○<br>MODERATE    | 111 | 103 | - | - | SMD <b>0.42 higher</b><br>(0.15 higher to 0.69 higher)<br><br><b>Favors supervised exercise</b> |
| <b>Self-reported function (lower scores indicate improvement)</b>     |                      |             |             |             |      |                     |     |     |   |   |                                                                                                 |

**Table 1. Unsupervised prescribed compared to supervised exercise for knee OA**

| Certainty assessment                                                                    |                      |             |             |                      |      |                  | Summary of findings |     |   |   |                                                                                                 |
|-----------------------------------------------------------------------------------------|----------------------|-------------|-------------|----------------------|------|------------------|---------------------|-----|---|---|-------------------------------------------------------------------------------------------------|
| 214<br>(1 RCT)                                                                          | serious <sup>a</sup> | not serious | not serious | not serious          | none | ⊕⊕⊕○<br>MODERATE | 111                 | 103 | - | - | SMD <b>0.31 higher</b><br>(0.04 higher to 0.58 higher)<br><br><b>Favors supervised exercise</b> |
| <b>Self-reported function - mid term follow up (lower scores indicate improvement)</b>  |                      |             |             |                      |      |                  |                     |     |   |   |                                                                                                 |
| 214<br>(1 RCT)                                                                          | serious <sup>a</sup> | not serious | not serious | serious <sup>b</sup> | none | ⊕⊕○○<br>LOW      | 111                 | 103 | - | - | SMD <b>0.22 higher</b><br>(0.05 lower to 0.49 higher)                                           |
| <b>Self-reported function - long term follow up (lower scores indicate improvement)</b> |                      |             |             |                      |      |                  |                     |     |   |   |                                                                                                 |
| 214<br>(1 RCT)                                                                          | serious <sup>a</sup> | not serious | not serious | serious <sup>b</sup> | none | ⊕⊕○○<br>LOW      | 111                 | 103 | - | - | SMD <b>0.25 higher</b><br>(0.02 lower to 0.52 higher)                                           |
| <b>6-min walk test (higher scores indicate improvement)</b>                             |                      |             |             |                      |      |                  |                     |     |   |   |                                                                                                 |
| 56<br>(1 RCT)                                                                           | serious <sup>a</sup> | not serious | not serious | serious <sup>b</sup> | none | ⊕⊕○○<br>LOW      | 33                  | 23  | - | - | SMD <b>0.02 lower</b><br>(0.55 lower to 0.51 higher)                                            |
| <b>TUG (lower scores indicate improvement)</b>                                          |                      |             |             |                      |      |                  |                     |     |   |   |                                                                                                 |

**Table 1. Unsupervised prescribed compared to supervised exercise for knee OA**

| Certainty assessment |                      |             |             |             |      |                  | Summary of findings |    |   |   |                                                                                            |
|----------------------|----------------------|-------------|-------------|-------------|------|------------------|---------------------|----|---|---|--------------------------------------------------------------------------------------------|
| 60<br>(1 RCT)        | serious <sup>a</sup> | not serious | not serious | not serious | none | ⊕⊕⊕○<br>MODERATE | 30                  | 30 | - | - | <b>SMD 0.54 lower</b><br>(1.06 lower to 0.02 lower)<br><b>Favors unsupervised exercise</b> |

CI: Confidence interval; SMD: Standardised mean difference

**Explanations**

- a. Participants and/or assessors not blinded
- b. Wide CI

**Table 2. RCT data not suitable for effect size calculation or combining with other data**

| Ref ID, Author, year    | Study type                  | Duration                                               | Population Description | Treatment given to relevant population                                                                                                                                                                                | Results                                                                                                                                                         |
|-------------------------|-----------------------------|--------------------------------------------------------|------------------------|-----------------------------------------------------------------------------------------------------------------------------------------------------------------------------------------------------------------------|-----------------------------------------------------------------------------------------------------------------------------------------------------------------|
| 3621, Callaghan, 1995   | RCT<br><br>Moderate quality | 4 weeks                                                | Knee OA                | Supervised (Group 2; 20 min supervised PT session, 2x/week; all open-chain exercises)<br><br>Unsupervised (Group 3; advice; instruction on how to perform weight bearing exercises at home to be performed 10x daily) | Median % change in VAS pain score (range); negative number indicates reduction in pain<br><br>Supervised: 18% (-500 to +14)<br>Unsupervised: -21% (-100 to +17) |
| 6208, Chamberlain, 1982 | RCT<br><br>Moderate quality | Using data up to 4 weeks, as another randomization was | Knee OA                | Supervised (Group A; diathermy + supervised exercises + home exercises 2x/day; only 2 exercises given)                                                                                                                | Comparison of VAS pain score:<br><br>Supervised:<br>T= 13.5;N=9; not significant<br>Unsupervised:<br>T= 10.5;N= 11; significant at P < 0.05                     |

|                 |                        |                        |         |                                                                                                                                                                                                                                                                                                                |                                                                                                                                                                                        |
|-----------------|------------------------|------------------------|---------|----------------------------------------------------------------------------------------------------------------------------------------------------------------------------------------------------------------------------------------------------------------------------------------------------------------|----------------------------------------------------------------------------------------------------------------------------------------------------------------------------------------|
|                 |                        | introducing after that |         | Unsupervised (Group B; 3 instruction sessions in 1 week, then to be completed at home; only 2 exercises given)                                                                                                                                                                                                 | * Wilcoxon Matched Pair Signed Ranks Test used.                                                                                                                                        |
| 293, Kudo, 2013 | RCT<br><br>Low quality | 3 months               | Knee OA | Supervised: (group exercise class, 90 min, 2x/week, 3 months)<br><br>Unsupervised: (workshop to introduce home exercise program, then to perform 2x/week for 3 months)<br><br>"The subjects did not have any other conservative treatments such as medication during the participating period of the program." | Estimated from BAR Chart:<br>WOMAC index (total) scores normalized to 100%:<br><br>Supervised:<br>Pre: 82 (11)<br>Post: 92 (7)<br><br>Unsupervised:<br>Pre: 81 (12)<br>Post: 85 (12.5) |

**Table 3. Unsupervised prescribed compared to supervised aerobic for Hip OA**

| Certainty assessment                                        |                      |               |              |             |                  |                               | Summary of findings                |                              |                          |                                         |                                                      |
|-------------------------------------------------------------|----------------------|---------------|--------------|-------------|------------------|-------------------------------|------------------------------------|------------------------------|--------------------------|-----------------------------------------|------------------------------------------------------|
| Nº of participants (studies)<br>Follow-up                   | Risk of bias         | Inconsistency | Indirectness | Imprecision | Publication bias | Overall certainty of evidence | Number of participants             |                              | Relative effect (95% CI) | Anticipated absolute effects            |                                                      |
|                                                             |                      |               |              |             |                  |                               | With Supervised aerobic for Hip OA | With Unsupervised prescribed |                          | Risk with Supervised aerobic for Hip OA | Risk difference with Unsupervised prescribed         |
| <b>WOMAC Pain (0-20, lower scores indicate improvement)</b> |                      |               |              |             |                  |                               |                                    |                              |                          |                                         |                                                      |
| 102 (1 RCT)                                                 | serious <sup>a</sup> | not serious   | not serious  | not serious | none             | ⊕⊕⊕○<br>MODERATE              | 50                                 | 52                           | -                        | -                                       | MD <b>0.75 higher</b><br>(0.64 lower to 2.14 higher) |



**Table 3. Unsupervised prescribed compared to supervised aerobic for Hip OA**

| Certainty assessment                                            |                      |             |             |             |      | Summary of findings |    |    |   |   |                                                      |
|-----------------------------------------------------------------|----------------------|-------------|-------------|-------------|------|---------------------|----|----|---|---|------------------------------------------------------|
| <b>WOMAC function (0-68, lower scores indicate improvement)</b> |                      |             |             |             |      |                     |    |    |   |   |                                                      |
| 102<br>(1 RCT)                                                  | serious <sup>a</sup> | not serious | not serious | not serious | none | ⊕⊕⊕○<br>MODERATE    | 50 | 52 | - | - | MD <b>1.25 higher</b><br>(3.04 lower to 5.54 higher) |
| <b>Chair stand test (higher scores indicate improvement)</b>    |                      |             |             |             |      |                     |    |    |   |   |                                                      |
| 102<br>(1 RCT)                                                  | serious <sup>a</sup> | not serious | not serious | not serious | none | ⊕⊕⊕○<br>MODERATE    | 50 | 52 | - | - | MD <b>1.1 lower</b><br>(2.49 lower to 0.29 higher)   |
| <b>Stair climbing (lower scores indicate improvement)</b>       |                      |             |             |             |      |                     |    |    |   |   |                                                      |
| 102<br>(1 RCT)                                                  | serious <sup>a</sup> | not serious | not serious | not serious | none | ⊕⊕⊕○<br>MODERATE    | 50 | 52 | - | - | MD <b>1 higher</b><br>(0.19 lower to 2.19 higher)    |
| <b>TUG (lower scores indicate improvement)</b>                  |                      |             |             |             |      |                     |    |    |   |   |                                                      |
| 102<br>(1 RCT)                                                  | serious <sup>a</sup> | not serious | not serious | not serious | none | ⊕⊕⊕○<br>MODERATE    | 50 | 52 | - | - | MD <b>0.7 higher</b><br>(0.14 lower to 1.54 higher)  |
| <b>6-min Walk Test (higher scores indicate improvement)</b>     |                      |             |             |             |      |                     |    |    |   |   |                                                      |

**Table 3. Unsupervised prescribed compared to supervised aerobic for Hip OA**

| Certainty assessment                                                                |                      |             |             |             |      |                  | Summary of findings |    |   |   |                                                                                           |
|-------------------------------------------------------------------------------------|----------------------|-------------|-------------|-------------|------|------------------|---------------------|----|---|---|-------------------------------------------------------------------------------------------|
| 102<br>(1 RCT)                                                                      | serious <sup>a</sup> | not serious | not serious | not serious | none | ⊕⊕⊕○<br>MODERATE | 50                  | 52 | - | - | MD <b>32 lower</b><br>(7.12 lower to 56.88 lower)<br><br><b>Favors supervised aerobic</b> |
| <b>WOMAC Pain - 8-month follow up (0-20, lower scores indicate improvement)</b>     |                      |             |             |             |      |                  |                     |    |   |   |                                                                                           |
| 102<br>(1 RCT)                                                                      | serious <sup>a</sup> | not serious | not serious | not serious | none | ⊕⊕⊕○<br>MODERATE | 50                  | 52 | - | - | MD <b>0.5 higher</b><br>(1.06 lower to 2.06 higher)                                       |
| <b>WOMAC function - 8-month follow up (0-68, lower scores indicate improvement)</b> |                      |             |             |             |      |                  |                     |    |   |   |                                                                                           |
| 102<br>(1 RCT)                                                                      | serious <sup>a</sup> | not serious | not serious | not serious | none | ⊕⊕⊕○<br>MODERATE | 50                  | 52 | - | - | MD <b>2 higher</b><br>(2.67 lower to 6.67 higher)                                         |
| <b>Chair stand test - 8-month follow up (higher scores indicate improvement)</b>    |                      |             |             |             |      |                  |                     |    |   |   |                                                                                           |
| 102<br>(1 RCT)                                                                      | serious <sup>a</sup> | not serious | not serious | not serious | none | ⊕⊕⊕○<br>MODERATE | 50                  | 52 | - | - | MD <b>0.3 lower</b><br>(2.03 lower to 1.43 higher)                                        |
| <b>Stair climbing - 8-month follow up (lower scores indicate improvement)</b>       |                      |             |             |             |      |                  |                     |    |   |   |                                                                                           |
| 102<br>(1 RCT)                                                                      | serious <sup>a</sup> | not serious | not serious | not serious | none | ⊕⊕⊕○<br>MODERATE | 50                  | 52 | - | - | MD <b>0.3 lower</b><br>(1.52 lower to 0.92 higher)                                        |
| <b>TUG - 8-month follow up (lower scores indicate improvement)</b>                  |                      |             |             |             |      |                  |                     |    |   |   |                                                                                           |

| <b>Table 3. Unsupervised prescribed compared to supervised aerobic for Hip OA</b> |                      |             |             |             |      |                  |                            |    |   |   |                                                                                            |
|-----------------------------------------------------------------------------------|----------------------|-------------|-------------|-------------|------|------------------|----------------------------|----|---|---|--------------------------------------------------------------------------------------------|
| <b>Certainty assessment</b>                                                       |                      |             |             |             |      |                  | <b>Summary of findings</b> |    |   |   |                                                                                            |
| 102<br>(1 RCT)                                                                    | serious <sup>a</sup> | not serious | not serious | not serious | none | ⊕⊕⊕○<br>MODERATE | 50                         | 52 | - | - | MD <b>0.1 higher</b><br>(0.74 lower to 0.94 higher)                                        |
| <b>6-min Walk Test - 8-month follow up (higher scores indicate improvement)</b>   |                      |             |             |             |      |                  |                            |    |   |   |                                                                                            |
| 102<br>(1 RCT)                                                                    | serious <sup>a</sup> | not serious | not serious | not serious | none | ⊕⊕⊕○<br>MODERATE | 50                         | 52 | - | - | MD <b>52 lower</b><br>(5.65 lower to 98.35 lower)<br><br><b>Favors supervised exercise</b> |

CI: Confidence interval; MD: Mean difference

### Explanations

a. Participants not blinded; outcome assessor was blinded

| <b>Table 4. Unsupervised prescribed compared to supervised strength for Hip OA</b> |              |               |              |             |                  |                               |                                     |                              |                          |                                          |                                              |
|------------------------------------------------------------------------------------|--------------|---------------|--------------|-------------|------------------|-------------------------------|-------------------------------------|------------------------------|--------------------------|------------------------------------------|----------------------------------------------|
| <b>Certainty assessment</b>                                                        |              |               |              |             |                  |                               | <b>Summary of findings</b>          |                              |                          |                                          |                                              |
| No of participants (studies)<br>Follow-up                                          | Risk of bias | Inconsistency | Indirectness | Imprecision | Publication bias | Overall certainty of evidence | Number of participants              |                              | Relative effect (95% CI) | Anticipated absolute effects             |                                              |
|                                                                                    |              |               |              |             |                  |                               | With Supervised strength for Hip OA | With Unsupervised prescribed |                          | Risk with Supervised strength for Hip OA | Risk difference with Unsupervised prescribed |
| <b>WOMAC Pain (0-20, lower scores indicate improvement)</b>                        |              |               |              |             |                  |                               |                                     |                              |                          |                                          |                                              |

**Table 4. Unsupervised prescribed compared to supervised strength for Hip OA**

| Certainty assessment                                            |                      |             |             |             |      |                  | Summary of findings |    |   |   |                                                      |
|-----------------------------------------------------------------|----------------------|-------------|-------------|-------------|------|------------------|---------------------|----|---|---|------------------------------------------------------|
| 102<br>(1 RCT)                                                  | serious <sup>a</sup> | not serious | not serious | not serious | none | ⊕⊕⊕○<br>MODERATE | 50                  | 52 | - | - | MD <b>0.55 higher</b><br>(0.68 lower to 1.78 higher) |
| <b>WOMAC function (0-68, lower scores indicate improvement)</b> |                      |             |             |             |      |                  |                     |    |   |   |                                                      |
| 102<br>(1 RCT)                                                  | serious <sup>a</sup> | not serious | not serious | not serious | none | ⊕⊕⊕○<br>MODERATE | 50                  | 52 | - | - | MD <b>2.25 higher</b><br>(1.79 lower to 6.29 higher) |
| <b>Chair stand test (higher scores indicate improvement)</b>    |                      |             |             |             |      |                  |                     |    |   |   |                                                      |
| 102<br>(1 RCT)                                                  | serious <sup>a</sup> | not serious | not serious | not serious | none | ⊕⊕⊕○<br>MODERATE | 50                  | 52 | - | - | MD <b>0</b><br>(1.12 lower to 1.12 higher)           |
| <b>Stair climbing (lower scores indicate improvement)</b>       |                      |             |             |             |      |                  |                     |    |   |   |                                                      |
| 102<br>(1 RCT)                                                  | serious <sup>a</sup> | not serious | not serious | not serious | none | ⊕⊕⊕○<br>MODERATE | 50                  | 52 | - | - | MD <b>0.1 lower</b><br>(1 lower to 0.8 higher)       |
| <b>TUG (lower scores indicate improvement)</b>                  |                      |             |             |             |      |                  |                     |    |   |   |                                                      |
| 102<br>(1 RCT)                                                  | serious <sup>a</sup> | not serious | not serious | not serious | none | ⊕⊕⊕○<br>MODERATE | 50                  | 52 | - | - | MD <b>0.1 higher</b><br>(0.52 lower to 0.72 higher)  |
| <b>6-min Walk Test (higher scores indicate improvement)</b>     |                      |             |             |             |      |                  |                     |    |   |   |                                                      |

**Table 4. Unsupervised prescribed compared to supervised strength for Hip OA**

| Certainty assessment                                                                      |                      |             |             |             |      |                  | Summary of findings |    |   |   |                                                     |
|-------------------------------------------------------------------------------------------|----------------------|-------------|-------------|-------------|------|------------------|---------------------|----|---|---|-----------------------------------------------------|
| 102<br>(1 RCT)                                                                            | serious <sup>a</sup> | not serious | not serious | not serious | none | ⊕⊕⊕○<br>MODERATE | 50                  | 52 | - | - | MD <b>7 lower</b><br>(28.49 lower to 14.49 higher)  |
| <b>WOMAC Pain - 8-month follow up (0-20, lower scores indicate improvement)</b>           |                      |             |             |             |      |                  |                     |    |   |   |                                                     |
| 102<br>(1 RCT)                                                                            | serious <sup>a</sup> | not serious | not serious | not serious | none | ⊕⊕⊕○<br>MODERATE | 50                  | 52 | - | - | MD <b>0.65 lower</b><br>(2.14 lower to 0.84 higher) |
| <b>Self-report function - 8-month follow up (0-68, lower scores indicate improvement)</b> |                      |             |             |             |      |                  |                     |    |   |   |                                                     |
| 102<br>(1 RCT)                                                                            | serious <sup>a</sup> | not serious | not serious | not serious | none | ⊕⊕⊕○<br>MODERATE | 50                  | 52 | - | - | MD <b>2.5 lower</b><br>(7.08 lower to 2.08 higher)  |
| <b>Chair stand test - 8-month follow up (higher scores indicate improvement)</b>          |                      |             |             |             |      |                  |                     |    |   |   |                                                     |
| 102<br>(1 RCT)                                                                            | serious <sup>a</sup> | not serious | not serious | not serious | none | ⊕⊕⊕○<br>MODERATE | 50                  | 52 | - | - | MD <b>1.1 higher</b><br>(0.69 lower to 2.89 higher) |
| <b>Stair climbing - 8-month follow up (lower scores indicate improvement)</b>             |                      |             |             |             |      |                  |                     |    |   |   |                                                     |
| 102<br>(1 RCT)                                                                            | serious <sup>a</sup> | not serious | not serious | not serious | none | ⊕⊕⊕○<br>MODERATE | 50                  | 52 | - | - | MD <b>0.8 higher</b><br>(0.65 lower to 2.25 higher) |
| <b>TUG - 8-month follow up (lower scores indicate improvement)</b>                        |                      |             |             |             |      |                  |                     |    |   |   |                                                     |

**Table 4. Unsupervised prescribed compared to supervised strength for Hip OA**

| Certainty assessment                                                            |                      |             |             |             |      |                  | Summary of findings |    |   |   |                                                     |
|---------------------------------------------------------------------------------|----------------------|-------------|-------------|-------------|------|------------------|---------------------|----|---|---|-----------------------------------------------------|
| 102<br>(1 RCT)                                                                  | serious <sup>a</sup> | not serious | not serious | not serious | none | ⊕⊕⊕○<br>MODERATE | 50                  | 52 | - | - | MD <b>0.8 higher</b><br>(0.04 lower to 1.64 higher) |
| <b>6-min Walk Test - 8-month follow up (higher scores indicate improvement)</b> |                      |             |             |             |      |                  |                     |    |   |   |                                                     |
| 102<br>(1 RCT)                                                                  | serious <sup>a</sup> | not serious | not serious | not serious | none | ⊕⊕⊕○<br>MODERATE | 50                  | 52 | - | - | MD <b>18 lower</b><br>(58.76 lower to 22.76 higher) |

CI: Confidence interval; MD: Mean difference

**Explanations**

a. Participants not blinded; outcome assessor was blinded

**References**

1. Odole AC, Ojo OD. A Telephone-based Physiotherapy Intervention for Patients with Osteoarthritis of the Knee. *Int J Telerehabil.* 2013;5(2):11-20.
2. McCarthy CJ, Mills PM, Pullen R, Roberts C, Silman A, Oldham JA. Supplementing a home exercise programme with a class-based exercise programme is more effective than home exercise alone in the treatment of knee osteoarthritis. *Rheumatology (Oxford).* 2004;43(7):880-886.
3. Tunay VB, Baltaci G, Atay AO. Hospital-based versus home-based proprioceptive and strengthening exercise programs in knee osteoarthritis. *Acta Orthop Traumatol Turc.* 2010;44(4):270-277.
4. Kuru Colak T, Kavlak B, Aydogdu O, Sahin E, Acar G, Demirbuden I, et al. The effects of therapeutic exercises on pain, muscle strength, functional capacity, balance and hemodynamic parameters in knee osteoarthritis patients: a randomized controlled study of supervised versus home exercises. *Rheumatol Int.* 2017;37(3):399-407.
5. Chamberlain MA, Care G, Harfield B. Physiotherapy in osteoarthrosis of the knees. A controlled trial of hospital versus home exercises. *Int Rehabil Med.* 1982;4(2):101-106.

6. Kudo M, Watanabe K, Otsubo H, Kamiya T, Kaneko F, Katayose M, et al. Analysis of effectiveness of therapeutic exercise for knee osteoarthritis and possible factors affecting outcome. *J Orthop Sci.* 2013;18(6):932-939.
7. Bieler T, Siersma V, Magnusson SP, Kjaer M, Christensen HE, Beyer N. In hip osteoarthritis, Nordic Walking is superior to strength training and home-based exercise for improving function. *Scand J Med Sci Sports.* 2017;27(8):873-886.

#### **PICO 24: Self-efficacy/self-management vs UC for knee or hip OA**

Summary. There were 23 non-blinded RCTs directly evaluating the effect of self-efficacy/self-management vs usual care for knee or hip OA. Subjects with hip OA were included in eleven RCTs, but only one of these trials exclusively studied subjects with hip OA (Poulsen et al). Twelve studies included knee OA only. The methodology for self-efficacy/self-management programs varied widely across studies. Most included some form of supervised instruction by a nurse or physical therapist, although the number of sessions varied widely (between one and eighteen), as did the focus of the sessions (exercise instruction vs OA pathophysiology education vs pain coping skills training vs goal setting). One study evaluated online modules without in-person instruction (Rini et al); one study included NSAID use reduction in the intervention (Mazucca et al, 2004); and two studies used activity trackers (Murphy et al, Li et al). Control groups were also rather different, and included no-attention, an educational pamphlet or video, instruction to exercise at home, and waitlist for intervention. A variety of pain and function outcomes were reported between different studies, hence data pooling was limited for each outcome.

Among studies that included subjects with hip OA, three studies reported no difference in WOMAC pain between intervention and control groups (Moe et al, Murphy et al, Buszewicz et al), one study reported no difference in HOOS pain (Poulsen et al), three studies reported no difference in AIMS2 pain scores (Hopman-Rock et al, Rini et al, Wetzels et al), and one study favored intervention (Allen et al). The same study also favored intervention for pain assessment by VAS, while others found no difference (Hopman-Rock et al, Moe et al, Poulsen et al). One study used a composite pain outcome and favored intervention (Broderick et al), and one study used the EuroQol-5D pain assessment tool, and also favored intervention (Hansson et al). Hence, of the ten studies that reported any pain outcomes, seven found no difference between intervention and control, and three favored intervention. For function outcomes, three studies found no difference in WOMAC function (Moe et al, Murphy et al, Buszewicz et al), one study found no difference in HOOS function (Poulsen et al), four studies found no difference in AIMS2 function (Allen et al, Hopman-Rock et al, Rini et al, Wetzels et al). There was also no difference in SF-36 function assessment (Heuts et al, Moe et al), or up-and-go tests (Hansson et al, Hopman-Rock et al). A single study that used a composite function outcome favored intervention (Broderick et al).

Among studies that evaluated subjects with knee OA only, three reported no difference in WOMAC pain between intervention and control groups (De Rizende et al 2016, Mazzuca et al 2004, Sommers et al), and one favored intervention (Coleman et al). One study reported no difference in KOOS pain (Li et al). One study reporting AIMS2 pain favored intervention (Keefe et al). On pain assessment by VAS, five studies reported no difference (De Rizende et al 2016, Mazzuca et al 1997, Ravaud et al, Yip et al 2007, Yip et al 2008), and one study favored intervention (Heuts et al). One study found no difference in pain by SF-36 (Kao et al). For all pain outcomes, nine studies found no difference between intervention and control, and three favored intervention. For function outcomes, three studies found no difference in WOMAC function scores between intervention and control (Mazzuca et al 2004, Ravaud et al, Somers et al), and one study favored intervention (Coleman et al). One study found no difference in KOOS function (Li et al), one study found no difference in SF-36 function (Kao et al), two studies found no difference in HAQ disability scores (Mazzuca et al 1997, Yip et al 2008), and one study found no difference in the timed up-and-go test (De Rizende et al 2017). Overall, eight studies found no difference in function outcomes between intervention and control, and one favored intervention.

A literature search update in August 2018 identified five additional relevant RCTs (Ganji et al., Isaramalai et al., da Silva et al., Omidy et al., Saffari et al.). The findings of these studies did not alter the overall findings in the tables below.

Quality of evidence across all critical outcomes: Moderate

| <b>Table 1. Self-management + UC compared to UC for knee and hip OA</b> |                     |                      |                     |                    |                         |                                      |                            |                                  |                                 |                                     |                                                  |
|-------------------------------------------------------------------------|---------------------|----------------------|---------------------|--------------------|-------------------------|--------------------------------------|----------------------------|----------------------------------|---------------------------------|-------------------------------------|--------------------------------------------------|
| <b>Certainty assessment</b>                                             |                     |                      |                     |                    |                         |                                      | <b>Summary of findings</b> |                                  |                                 |                                     |                                                  |
| <b>No of participants (studies) Follow-up</b>                           | <b>Risk of bias</b> | <b>Inconsistency</b> | <b>Indirectness</b> | <b>Imprecision</b> | <b>Publication bias</b> | <b>Overall certainty of evidence</b> | <b>Number of events</b>    |                                  | <b>Relative effect (95% CI)</b> | <b>Anticipated absolute effects</b> |                                                  |
|                                                                         |                     |                      |                     |                    |                         |                                      | <b>With UC</b>             | <b>With self-management + UC</b> |                                 | <b>Risk with UC</b>                 | <b>Risk difference with self-management + UC</b> |
| <b>WOMAC pain (0-20, lower scores indicate improvement)</b>             |                     |                      |                     |                    |                         |                                      |                            |                                  |                                 |                                     |                                                  |



**Table 1. Self-management + UC compared to UC for knee and hip OA**

| Certainty assessment                                            |                      |             |             |             |      | Summary of findings |     |     |   |   |                                                                                         |
|-----------------------------------------------------------------|----------------------|-------------|-------------|-------------|------|---------------------|-----|-----|---|---|-----------------------------------------------------------------------------------------|
| 448<br>(2 RCTs)                                                 | serious <sup>a</sup> | not serious | not serious | not serious | none | ⊕⊕⊕○<br>MODERATE    | 223 | 225 | - | - | MD <b>0.32 lower</b><br>(0.75 lower to 0.11 higher)                                     |
| <b>HOOS pain (0-100, higher scores indicate improvement)</b>    |                      |             |             |             |      |                     |     |     |   |   |                                                                                         |
| 66<br>(1 RCT)                                                   | serious <sup>a</sup> | not serious | not serious | not serious | none | ⊕⊕⊕○<br>MODERATE    | 32  | 34  | - | - | MD <b>4 lower</b><br>(9.83 lower to 1.83 higher)                                        |
| <b>AIMS2 Pain (lower scores indicate improvement)</b>           |                      |             |             |             |      |                     |     |     |   |   |                                                                                         |
| 634<br>(4 RCTs)                                                 | serious <sup>a</sup> | not serious | not serious | not serious | none | ⊕⊕⊕○<br>MODERATE    | 314 | 320 | - | - | MD <b>0.58 lower</b><br>(0.91 lower to 0.25 lower)<br><br><b>Favors self-management</b> |
| <b>Pain by VAS (0-10, lower scores indicate improvement)</b>    |                      |             |             |             |      |                     |     |     |   |   |                                                                                         |
| 791<br>(4 RCTs)                                                 | serious <sup>a</sup> | not serious | not serious | not serious | none | ⊕⊕⊕○<br>MODERATE    | 399 | 392 | - | - | MD <b>0.24 lower</b><br>(0.86 lower to 0.38 higher)                                     |
| <b>WOMAC function (0-68, lower scores indicate improvement)</b> |                      |             |             |             |      |                     |     |     |   |   |                                                                                         |

**Table 1. Self-management + UC compared to UC for knee and hip OA**

| <b>Table 1. Self-management + UC compared to UC for knee and hip OA</b> |                      |             |             |                      |      |                            |     |     |   |   |                                                      |
|-------------------------------------------------------------------------|----------------------|-------------|-------------|----------------------|------|----------------------------|-----|-----|---|---|------------------------------------------------------|
| <b>Certainty assessment</b>                                             |                      |             |             |                      |      | <b>Summary of findings</b> |     |     |   |   |                                                      |
| 448<br>(2 RCTs)                                                         | serious <sup>a</sup> | not serious | not serious | not serious          | none | ⊕⊕⊕○<br>MODERATE           | 223 | 225 | - | - | MD <b>0.02 higher</b><br>(0.39 lower to 0.42 higher) |
| <b>HOOS function (0-100, higher scores indicate improvement)</b>        |                      |             |             |                      |      |                            |     |     |   |   |                                                      |
| 66<br>(1 RCT)                                                           | serious <sup>a</sup> | not serious | not serious | not serious          | none | ⊕⊕⊕○<br>MODERATE           | 32  | 34  | - | - | MD <b>4 lower</b><br>(9.62 lower to 1.62 higher)     |
| <b>AIMS2 function (lower scores indicate improvement)</b>               |                      |             |             |                      |      |                            |     |     |   |   |                                                      |
| 638<br>(4 RCTs)                                                         | serious <sup>a</sup> | not serious | not serious | not serious          | none | ⊕⊕⊕○<br>MODERATE           | 318 | 320 | - | - | MD <b>0.15 lower</b><br>(0.4 lower to 0.09 higher)   |
| <b>SF-36 function (higher scores indicate improvement)</b>              |                      |             |             |                      |      |                            |     |     |   |   |                                                      |
| 510<br>(2 RCTs)                                                         | serious <sup>a</sup> | not serious | not serious | serious <sup>b</sup> | none | ⊕⊕○○<br>LOW                | 260 | 250 | - | - | MD <b>0.66 higher</b><br>(0.34 lower to 1.67 higher) |
| <b>Timed up-and-go test (lower scores indicate improvement)</b>         |                      |             |             |                      |      |                            |     |     |   |   |                                                      |

**Table 1. Self-management + UC compared to UC for knee and hip OA**

| Certainty assessment |                      |             |             |                      |      |             | Summary of findings |    |   |   |                                                    |
|----------------------|----------------------|-------------|-------------|----------------------|------|-------------|---------------------|----|---|---|----------------------------------------------------|
| 96<br>(1 RCT)        | serious <sup>a</sup> | not serious | not serious | serious <sup>b</sup> | none | ⊕⊕○○<br>LOW | 46                  | 50 | - | - | MD <b>0.9 lower</b><br>(2.24 lower to 0.44 higher) |

CI: Confidence interval; MD: Mean difference

### Explanations

- a. Subjects not blinded; unclear if any studies blinded outcome assessors, but blinding could not be done for self-reported outcomes
- b. Wide confidence intervals

**Table 2. RCT data not suitable for effect size calculation or combining with other data**

| Ref ID, Author, year | Study type         | Duration    | Population Description                                                                      | Treatment given to relevant population                                                                                                                                  | Results                                                                                                                                                                                                                                                                                                                              |
|----------------------|--------------------|-------------|---------------------------------------------------------------------------------------------|-------------------------------------------------------------------------------------------------------------------------------------------------------------------------|--------------------------------------------------------------------------------------------------------------------------------------------------------------------------------------------------------------------------------------------------------------------------------------------------------------------------------------|
| Broderick, 2014      | single-blinded RCT | 10-20 weeks | 256 patients with knee or hip OA                                                            | 10 weekly 40 min sessions of pain coping skills training with nurse practitioner vs non-intervention; both groups received information on OA resources in the community | Composite pain and function scores comprised of AIMS2 pain and function, WOMAC, Beck depression, and coping questionnaires' pain questions:<br><br>Composite pain:<br>Treatment group: -0.38 (SE 0.07); control group - 0.17 (SE 0.07)<br><br>Composite function:<br>Treatment group: -0.28 (SE 0.06); control group - 0.1 (SE 0.06) |
| Buszewicz, 2006      | single-blind RCT   | 4 months    | 812 subjects with OA of the hip or knee by medical records (no clear radiographic criteria) | "Challenging arthritis" programme, which appears to be an in-person 6 session x 2.5 hr course + OA education booklet vs OA education booklet                            | WOMAC pain mean difference (treatment vs control): -0.15 (-0.57-0.28)<br><br>WOMAC function mean difference (treatment vs control): -1.22 (-2.59-0.16)                                                                                                                                                                               |

|               |                  |                                        |                                                        |                                                                                                                                                      |                                                                                                                                                                                                                                                                                                                                                               |
|---------------|------------------|----------------------------------------|--------------------------------------------------------|------------------------------------------------------------------------------------------------------------------------------------------------------|---------------------------------------------------------------------------------------------------------------------------------------------------------------------------------------------------------------------------------------------------------------------------------------------------------------------------------------------------------------|
|               |                  |                                        |                                                        |                                                                                                                                                      |                                                                                                                                                                                                                                                                                                                                                               |
| Hansson, 2010 | single-blind RCT | 5 weeks, outcomes assessed at 6 months | 114 patients (mean age 63) with knee, hip, or hand OA. | Patient education (5 group sessions, 3 hours each, once a week for 5 weeks focusing on self-efficacy) vs usual care (described as "living as usual") | <p>EuroQol-5D instrument for assessment of global health/pain/function/anxiety:</p> <p>Fewer patients with "extreme problems" due to pain in the intervention group at 6 months (13% vs 21% among controls, p&lt;0.001)</p> <p>Timed sit to stand test (number of times) at 6 months: mean difference intervention vs control 5.19 (-5.3 to 10.92), p=0.1</p> |

**Table 3. Knee only Self-management + UC compared to UC for knee OA**

| Certainty assessment                                         |                      |                      |              |             |                  |                               | Summary of findings |                                     |                          |                              |                                                     |
|--------------------------------------------------------------|----------------------|----------------------|--------------|-------------|------------------|-------------------------------|---------------------|-------------------------------------|--------------------------|------------------------------|-----------------------------------------------------|
| Nº of participants (studies)<br>Follow-up                    | Risk of bias         | Inconsistency        | Indirectness | Imprecision | Publication bias | Overall certainty of evidence | Number of patients  |                                     | Relative effect (95% CI) | Anticipated absolute effects |                                                     |
|                                                              |                      |                      |              |             |                  |                               | With UC             | With Knee only Self-management + UC |                          | Risk with UC                 | Risk difference with Knee only Self-management + UC |
| <b>WOMAC pain (0-20, lower scores indicate improvement)</b>  |                      |                      |              |             |                  |                               |                     |                                     |                          |                              |                                                     |
| 493 (4 RCTs)                                                 | serious <sup>a</sup> | serious <sup>b</sup> | not serious  | not serious | none             | ⊕⊕○○<br>LOW                   | 225                 | 268                                 | -                        | -                            | MD <b>0.76 lower</b><br>(1.81 lower to 0.29 higher) |
| <b>KOOS pain (0-100, higher scores indicate improvement)</b> |                      |                      |              |             |                  |                               |                     |                                     |                          |                              |                                                     |

**Table 3. Knee only Self-management + UC compared to UC for knee OA**

| Certainty assessment                                         |                      |             |             |                      |      | Summary of findings |     |     |   |   |                                                                                         |
|--------------------------------------------------------------|----------------------|-------------|-------------|----------------------|------|---------------------|-----|-----|---|---|-----------------------------------------------------------------------------------------|
| 34<br>(1 RCT)                                                | serious <sup>a</sup> | not serious | not serious | not serious          | none | ⊕⊕⊕○<br>MODERATE    | 17  | 17  | - | - | MD <b>3.9 higher</b><br>(4.9 lower to 12.7 higher)                                      |
| <b>AIMS2 Pain (lower scores indicate improvement)</b>        |                      |             |             |                      |      |                     |     |     |   |   |                                                                                         |
| 174<br>(2 RCTs)                                              | serious <sup>a</sup> | not serious | not serious | not serious          | none | ⊕⊕⊕○<br>MODERATE    | 82  | 92  | - | - | MD <b>0.61 lower</b><br>(1.35 lower to 0.13 higher)                                     |
| <b>Pain by VAS (0-10, lower scores indicate improvement)</b> |                      |             |             |                      |      |                     |     |     |   |   |                                                                                         |
| 974<br>(6 RCTs)                                              | serious <sup>a</sup> | not serious | not serious | not serious          | none | ⊕⊕⊕○<br>MODERATE    | 505 | 469 | - | - | MD <b>0.65 lower</b><br>(0.92 lower to 0.37 lower)<br><br><b>Favors self-management</b> |
| <b>SF-36 pain (higher scores indicate improvement)</b>       |                      |             |             |                      |      |                     |     |     |   |   |                                                                                         |
| 205<br>(1 RCT)                                               | serious <sup>a</sup> | not serious | not serious | serious <sup>c</sup> | none | ⊕⊕○○<br>LOW         | 91  | 114 | - | - | MD <b>2.91 higher</b><br>(1.47 lower to 7.29 higher)                                    |
| <b>HAQ pain (lower scores indicate improvement)</b>          |                      |             |             |                      |      |                     |     |     |   |   |                                                                                         |

**Table 3. Knee only Self-management + UC compared to UC for knee OA**

| Certainty assessment                                             |                      |                      |             |                      |      |                  | Summary of findings |     |   |   |                                                     |
|------------------------------------------------------------------|----------------------|----------------------|-------------|----------------------|------|------------------|---------------------|-----|---|---|-----------------------------------------------------|
| 165<br>(1 RCT)                                                   | serious <sup>a</sup> | not serious          | not serious | not serious          | none | ⊕⊕⊕○<br>MODERATE | 83                  | 82  | - | - | MD <b>0.13 lower</b><br>(1 lower to 0.74 higher)    |
| <b>WOMAC function (0-68, lower scores indicate improvement)</b>  |                      |                      |             |                      |      |                  |                     |     |   |   |                                                     |
| 763<br>(4 RCTs)                                                  | serious <sup>a</sup> | serious <sup>b</sup> | not serious | not serious          | none | ⊕⊕○○<br>LOW      | 377                 | 386 | - | - | MD <b>2.23 lower</b><br>(5.3 lower to 0.84 higher)  |
| <b>KOOS function (0-100, higher scores indicate improvement)</b> |                      |                      |             |                      |      |                  |                     |     |   |   |                                                     |
| 34<br>(1 RCT)                                                    | serious <sup>a</sup> | not serious          | not serious | serious <sup>c</sup> | none | ⊕⊕○○<br>LOW      | 17                  | 17  | - | - | MD <b>7.2 higher</b><br>(1.4 lower to 15.8 higher)  |
| <b>SF-36 Function (higher scores indicate improvement)</b>       |                      |                      |             |                      |      |                  |                     |     |   |   |                                                     |
| 205<br>(1 RCT)                                                   | serious <sup>a</sup> | not serious          | not serious | serious <sup>c</sup> | none | ⊕⊕○○<br>LOW      | 91                  | 114 | - | - | MD <b>3.72 lower</b><br>(8.02 lower to 0.58 higher) |
| <b>HAQ disability (lower scores indicate improvement)</b>        |                      |                      |             |                      |      |                  |                     |     |   |   |                                                     |

| <b>Table 3. Knee only Self-management + UC compared to UC for knee OA</b> |                      |             |             |                      |      |                  |                            |     |   |   |                                                     |
|---------------------------------------------------------------------------|----------------------|-------------|-------------|----------------------|------|------------------|----------------------------|-----|---|---|-----------------------------------------------------|
| <b>Certainty assessment</b>                                               |                      |             |             |                      |      |                  | <b>Summary of findings</b> |     |   |   |                                                     |
| 239<br>(2 RCTs)                                                           | serious <sup>a</sup> | not serious | not serious | not serious          | none | ⊕⊕⊕○<br>MODERATE | 118                        | 121 | - | - | MD <b>0.05 lower</b><br>(0.67 lower to 0.57 higher) |
| <b>Timed up-and-go test (lower scores indicate improvement)</b>           |                      |             |             |                      |      |                  |                            |     |   |   |                                                     |
| 45<br>(1 RCT)                                                             | serious <sup>a</sup> | not serious | not serious | serious <sup>c</sup> | none | ⊕⊕○○<br>LOW      | 21                         | 24  | - | - | MD <b>0.7 higher</b><br>(2.61 lower to 4.01 higher) |

**CI:** Confidence interval; **MD:** Mean difference

## Explanations

- a. Subjects not blinded; most studies did not report blinding outcome assessors
- b. One study favoring intervention, other with null result
- c. Wide confidence intervals

## References:

Allen, K. D., et al. (2010). "Telephone-based self-management of osteoarthritis: A randomized trial." *Ann Intern Med* 153(9): 570-579.

Broderick, J. E., et al. (2014). "Nurse practitioners can effectively deliver pain coping skills training to osteoarthritis patients with chronic pain: A randomized, controlled trial." *Pain* 155(9): 1743-1754.

Buszewicz, M., et al. (2006). "Self management of arthritis in primary care: randomised controlled trial." *BMJ* 333(7574): 879.

Coleman, S., et al. (2012). "A randomised controlled trial of a self-management education program for osteoarthritis of the knee delivered by health care professionals." *Arthritis Res Ther* 14(1): R21.

Da Silva, J. M. R., et al. (2017). "Educational program promoting regular physical exercise improves functional capacity and daily living physical activity in subjects with knee osteoarthritis." *BMC Musc Dis* 18: 546.

De Rezende, M. U., et al. (2017). "Objective functional results in patients with knee osteoarthritis submitted to a 2-day educational programme: a prospective randomised clinical trial." *BMJ Open Sport Exerc Med* 2(1): e000200.

De Rezende, M. U., et al. (2016). "One-Year Results of an Educational Program on Osteoarthritis: A Prospective Randomized Controlled Trial in Brazil." *Geriatr Orthop Surg Rehabil* 7(2): 86-94.

Ganji, R., et al. (2018). "The effect of self-management educational program on pain intensity in elderly patients with knee osteoarthritis: a randomized clinical trial." *Maced J Med Sci* 6: 1062-1066.

Hansson, E. E., et al. (2010). "Effect of an education programme for patients with osteoarthritis in primary care--a randomized controlled trial." *BMC Musculoskeletal Disord* 11: 244.

Heuts, P. H., et al. (2005). "Self-management in osteoarthritis of hip or knee: a randomized clinical trial in a primary healthcare setting." *J Rheumatol* 32(3): 543-549.

Hopman-Rock, M. and M. H. Westhoff (2000). "The effects of a health educational and exercise program for older adults with osteoarthritis for the hip or knee." *J Rheumatol* 27(8): 1947-1954.

Isaramalai, S., et al. (2018). "Integrating participatory ergonomic management in non-weight-bearing exercise and progressive resistance exercise on self-care and functional ability in aged farmers with knee osteoarthritis: a clustered randomized controlled trial." *Clin Int Aging* 13: 101-108.

Kao, M. J., et al. (2012). "The effectiveness of a self-management program on quality of life for knee osteoarthritis (OA) patients." *Arch Gerontol Geriatr* 54(2): 317-324.

Keefe, F. J., et al. (1990). "Pain Coping Skills Training in the Management of Osteoarthritic Knee Pain: A Comparative Study." *Behavior Therapy* 21(1): 49-62.

Li, L. C., et al. (2017). "A Community-Based Physical Activity Counselling Program for People With Knee Osteoarthritis: Feasibility and Preliminary Efficacy of the Track-OA Study." *JMIR Mhealth Uhealth* 5(6): e86.



- Mazzuca, S. A., et al. (1997). "Effects of self-care education on the health status of inner-city patients with osteoarthritis of the knee." *Arthritis Rheum* 40(8): 1466-1474.
- Mazzuca, S. A., et al. (2004). "Can a nurse-directed intervention reduce the exposure of patients with knee osteoarthritis to nonsteroidal antiinflammatory drugs?" *J Clin Rheumatol* 10(6): 315-322.
- Moe, R. H., et al. (2016). "Effectiveness of an Integrated Multidisciplinary Osteoarthritis Outpatient Program versus Outpatient Clinic as Usual: A Randomized Controlled Trial." *J Rheumatol* 43(2): 411-418.
- Murphy, S. L., et al. (2016). "Brief time-based activity pacing instruction as a singular behavioral intervention was not effective in participants with symptomatic osteoarthritis." *Pain* 157(7): 1563-1573.
- Omidi, A., et al. (2018). "The effect of self-management training on pain intensity in patients with knee osteoarthritis referring to orthopedic clinic of Imam Hossein Hospital in Malayer." *Nat J Physiol Pharm Pharmacol* 8: 1035-1040.
- Poulsen, E., et al. (2013). "Patient education with or without manual therapy compared to a control group in patients with osteoarthritis of the hip. A proof-of-principle three-arm parallel group randomized clinical trial." *Osteoarthritis Cartilage* 21(10): 1494-1503.
- Ravaud, P., et al. (2009). "ARTIST (osteoarthritis intervention standardized) study of standardised consultation versus usual care for patients with osteoarthritis of the knee in primary care in France: pragmatic randomised controlled trial." *BMJ* 338: b421.
- Rini, C., et al. (2015). "Automated Internet-based pain coping skills training to manage osteoarthritis pain: a randomized controlled trial." *Pain* 156(5): 837-848.
- Saffari, M., et al. (2018). "A theory of planned behavior-based intervention to improve quality of life in patients with knee/hip osteoarthritis: a randomized controlled trial." *Clin Rheumatol* 37: 2505-2515.
- Somers, T. J., et al. (2012). "Pain coping skills training and lifestyle behavioral weight management in patients with knee osteoarthritis: a randomized controlled study." *Pain* 153(6): 1199-1209.
- Wetzels, R., et al. (2008). "Family practice nurses supporting self-management in older patients with mild osteoarthritis: a randomized trial." *BMC Fam Pract* 9: 7.
- Yip, Y. B., et al. (2007). "Effects of a self-management arthritis programme with an added exercise component for osteoarthritic knee: randomized controlled trial." *J Adv Nurs* 59(1): 20-28.
- Yip, Y. B., et al. (2008). "A 1-year follow-up of an experimental study of a self-management arthritis programme with an added exercise component of clients with osteoarthritis of the knee." *Psychol Health Med* 13(4): 402-414.



**PICO 25: CBT compared to usual care for knee OA**

Summary: Two RCTs<sup>[1-2]</sup> compared cognitive-behavioral therapy to usual care for adults with knee OA. No significant difference was observed between groups post-treatment for pain and self-reported function. At 3-6 month follow-up, there was again no difference in pain between groups, however there is low certainty with this outcome as there was imprecision in the effect estimate.

Quality of evidence for all critical outcomes: Low

| <b>CBT compared to usual care for knee OA</b>                                    |                      |                      |                     |                      |                         |                                      |                                    |                 |                                 |                                         |                                                      |
|----------------------------------------------------------------------------------|----------------------|----------------------|---------------------|----------------------|-------------------------|--------------------------------------|------------------------------------|-----------------|---------------------------------|-----------------------------------------|------------------------------------------------------|
| <b>Certainty assessment</b>                                                      |                      |                      |                     |                      |                         |                                      | <b>Summary of findings</b>         |                 |                                 |                                         |                                                      |
| <b>Nº of participants (studies) Follow-up</b>                                    | <b>Risk of bias</b>  | <b>Inconsistency</b> | <b>Indirectness</b> | <b>Imprecision</b>   | <b>Publication bias</b> | <b>Overall certainty of evidence</b> | <b>Number of subjects</b>          |                 | <b>Relative effect (95% CI)</b> | <b>Anticipated absolute effects</b>     |                                                      |
|                                                                                  |                      |                      |                     |                      |                         |                                      | <b>With usual care for knee OA</b> | <b>With CBT</b> |                                 | <b>Risk with usual care for knee OA</b> | <b>Risk difference with CBT</b>                      |
| <b>WOMAC Pain (lower scores indicate improvement)</b>                            |                      |                      |                     |                      |                         |                                      |                                    |                 |                                 |                                         |                                                      |
| 203 (2 RCTs)                                                                     | serious <sup>a</sup> | not serious          | not serious         | serious <sup>b</sup> | none                    | ⊕⊕○○<br>LOW                          | 103                                | 100             | -                               | -                                       | SMD <b>0.11 lower</b><br>(0.39 lower to 0.16 higher) |
| <b>WOMAC function (0-68, lower scores indicate improvement)</b>                  |                      |                      |                     |                      |                         |                                      |                                    |                 |                                 |                                         |                                                      |
| 110 (1 RCT)                                                                      | serious <sup>a</sup> | not serious          | not serious         | serious <sup>b</sup> | none                    | ⊕⊕○○<br>LOW                          | 55                                 | 55              | -                               | -                                       | MD <b>0.20 lower</b><br>(8.22 lower to 7.82 higher)  |
| <b>WOMAC Pain - mid term follow up (0-20, lower scores indicate improvement)</b> |                      |                      |                     |                      |                         |                                      |                                    |                 |                                 |                                         |                                                      |

| CBT compared to usual care for knee OA |                      |             |             |                      |      |                     |    |    |   |   |                                                      |
|----------------------------------------|----------------------|-------------|-------------|----------------------|------|---------------------|----|----|---|---|------------------------------------------------------|
| Certainty assessment                   |                      |             |             |                      |      | Summary of findings |    |    |   |   |                                                      |
| 76<br>(1 RCT)                          | serious <sup>a</sup> | not serious | not serious | serious <sup>b</sup> | none | ⊕⊕○○<br>LOW         | 40 | 36 | - | - | MD <b>0.49 higher</b><br>(0.66 lower to 1.64 higher) |

CI: Confidence interval; SMD: Standardised mean difference; MD: Mean difference

## Explanations

- a. Participants not blinded for Helminen; both studies blinded outcome assessors
- b. Wide 95% CI that includes possibility of a clinically significant difference between groups

## References

1. Helminen EE, Sinikallio SH, Valjakka AL, Vaisanen-Rouvali RH, Arokoski JP. Effectiveness of a cognitive-behavioural group intervention for knee osteoarthritis pain: a randomized controlled trial. *Clin Rehabil.* 2015;29(9):868-881.
2. Smith MT, Finan PH, Buenaver LF, Robinson M, Haque U, Quain A, et al. Cognitive-behavioral therapy for insomnia in knee osteoarthritis: a randomized, double-blind, active placebo-controlled clinical trial. *Arthritis Rheumatol.* 2015;67(5):1221-1233.

## PICO 26: Weight loss compared to usual care for knee or hip OA

Summary: The literature search identified six clinical trials that directly evaluated the effects of weight loss on pain and function in knee OA, but none in hip OA. All studies included long-term weight loss programs (6-18 months), except the study by Christensen et al (8 weeks). Weight loss was achieved either by calorie restriction (Bliddal et al, Gudbergesen et al, Christensen et al), or with diet and exercise regimens (Messier et al, Miller et al, Sommers et al). Participants were not blinded in any of the trials, attrition rates were high in two studies (Bliddal et al, Somers et al). Five of the studies directly reported WOMAC pain scores (Bliddal et al, Christensen et al, Messier et al, Miller et al, Somers et al), and one study reported percent of subjects achieving WOMAC pain score reduction of 50% or more (Gudbergesen et al). Three of the studies favored intervention for pain outcomes (Bliddal et al, Miller et al, Gudbergesen et al), and three reported no significant difference between intervention and control (Christensen et al, Messier et al, Somers et al). Similarly, all six studies reported function outcomes, three favored intervention

(Christensen et al, Gudbergson et al, Miller et al), and the rest reported null results (Bliddal et al, Messier et al, Somers et al). Five out of six studies reported adverse events. Of these, none reported serious adverse events, one study (Bliddal et al) reported minor adverse events in the calorie restriction group (constipation, flatulence, dizziness, and heightened sensitivity to cold). Two available systematic reviews of RCTs and observational studies (Groen et al, Gill et al) did not include adverse events data.

Quality of evidence across all critical outcomes: Moderate

| <b>Table 1. Weight loss compared to usual care for knee and Hip OA</b> |                      |                      |                     |                    |                         |                                      |                            |                         |                                 |                                     |                                                                                      |
|------------------------------------------------------------------------|----------------------|----------------------|---------------------|--------------------|-------------------------|--------------------------------------|----------------------------|-------------------------|---------------------------------|-------------------------------------|--------------------------------------------------------------------------------------|
| <b>Certainty assessment</b>                                            |                      |                      |                     |                    |                         |                                      | <b>Summary of findings</b> |                         |                                 |                                     |                                                                                      |
| <b>Nº of participants (studies) Follow-up</b>                          | <b>Risk of bias</b>  | <b>Inconsistency</b> | <b>Indirectness</b> | <b>Imprecision</b> | <b>Publication bias</b> | <b>Overall certainty of evidence</b> | <b>Number of patients</b>  |                         | <b>Relative effect (95% CI)</b> | <b>Anticipated absolute effects</b> |                                                                                      |
|                                                                        |                      |                      |                     |                    |                         |                                      | <b>With placebo</b>        | <b>With Weight loss</b> |                                 | <b>Risk with placebo</b>            | <b>Risk difference with Weight loss</b>                                              |
| <b>WOMAC Pain subscale (lower scores indicate improvement)</b>         |                      |                      |                     |                    |                         |                                      |                            |                         |                                 |                                     |                                                                                      |
| 448 (5 RCTs)                                                           | serious <sup>a</sup> | not serious          | not serious         | not serious        | none                    | ⊕⊕⊕○<br>MODERATE                     | 222                        | 226                     | -                               | -                                   | SMD <b>0.32 lower</b><br>(0.59 lower to 0.04 lower)<br><br><b>Favors weight loss</b> |
| <b>Achieved pain reduction of &gt;50% on WOMAC pain scale</b>          |                      |                      |                     |                    |                         |                                      |                            |                         |                                 |                                     |                                                                                      |

**Table 1. Weight loss compared to usual care for knee and Hip OA**

| Certainty assessment                                            |                      |             |             |                      |      |                  | Summary of findings |                 |                                   |               |                                                                                      |
|-----------------------------------------------------------------|----------------------|-------------|-------------|----------------------|------|------------------|---------------------|-----------------|-----------------------------------|---------------|--------------------------------------------------------------------------------------|
| 30<br>(1 RCT)                                                   | serious <sup>a</sup> | not serious | not serious | serious <sup>b</sup> | none | ⊕⊕○○<br>LOW      | 2/15<br>(13.3%)     | 6/15<br>(40.0%) | <b>OR 4.33</b><br>(0.71 to 26.53) | 133 per 1,000 | <b>266 more per 1,000</b><br>(35 fewer to 670 more)                                  |
| <b>WOMAC function score (lower scores indicate improvement)</b> |                      |             |             |                      |      |                  |                     |                 |                                   |               |                                                                                      |
| 448<br>(5 RCTs)                                                 | serious <sup>a</sup> | not serious | not serious | not serious          | none | ⊕⊕⊕○<br>MODERATE | 222                 | 226             | -                                 | -             | SMD <b>0.30 lower</b><br>(0.52 lower to 0.09 lower)<br><br><b>Favors weight loss</b> |
| <b>6 min walk distance (higher scores indicate improvement)</b> |                      |             |             |                      |      |                  |                     |                 |                                   |               |                                                                                      |
| 201<br>(2 RCTs)                                                 | serious <sup>a</sup> | not serious | not serious | serious <sup>b</sup> | none | ⊕⊕○○<br>LOW      | 99                  | 102             | -                                 | -             | MD <b>40.16 higher</b><br>(6.68 lower to 86.99 higher)                               |

**CI:** Confidence interval; **MD:** Mean difference; **OR:** Odds ratio

**Explanations**

a. Participants not blinded; outcome assessors were blinded

b. Wide confidence interval

**Table 2. RCT and systematic review data not suitable for RevMan**

| Ref ID, Author, year           | Study type                                                             | Duration         | Population Description                                                                         | Treatment given to relevant population                                                                 | Results                                                                                                                                                                                                                                                                                                                                                                            |
|--------------------------------|------------------------------------------------------------------------|------------------|------------------------------------------------------------------------------------------------|--------------------------------------------------------------------------------------------------------|------------------------------------------------------------------------------------------------------------------------------------------------------------------------------------------------------------------------------------------------------------------------------------------------------------------------------------------------------------------------------------|
| RefID 6617<br>Gudbergse n 2011 | single-blind RCT                                                       | 32 weeks         | 30 overweight women with knee OA                                                               | 32 weeks of low-calorie formulated diet given to 15 pts vs advice to restrict calorie intake to 15 pts | The WOMAC disability index showed improvement in the LED group when compared with the control group, MD of - 266 mm (95%CI: - 468.9 to -63.1; p < 0.01)<br>There were no adverse events                                                                                                                                                                                            |
| RefID 2808<br>Groen, 2015      | Systematic review of RCTs and observational studies (any study design) | Inception - 2014 | 13 studies, 11 of them single arm or surgical technique (intervention vs intervention) studies | Bariatric surgery for pain and function in OA (unspecified site)                                       | All 13 studies reported pain outcomes. Ten out of 13 studies (77%) reported a significant improvement in at least one pain assessment tool.<br><br>Five out of 13 studies analysed the effect of bariatric surgery on knee physical function. All five studies (100%) reported significant improvements<br><br>Adverse event data were not reported<br><br>Low quality of evidence |
| RefID 565<br>Gill 2011         | Systematic review of RCTs and observational studies (any study design) | Not reported     | 6 studies, five case series and one case-control study                                         | Bariatric surgery for pain, radiographic severity, and quality of life in OA of the hip and knee       | All studies reported pain outcomes, but one of them also involved arthroplasty. All reported significant improvement in at least one pain assessment tool.<br><br>One of the studies specifically reported function, and showed improvement.<br><br>Adverse event data were not reported<br><br>Low quality of evidence; surprisingly young patients included                      |

**References:**

1. Bliddal, H., et al. (2011). "Weight loss as treatment for knee osteoarthritis symptoms in obese patients: 1-year results from a randomised controlled trial." *Ann Rheum Dis* 70(10): 1798-1803.

2. Christensen, R., et al. (2005). "Weight loss: the treatment of choice for knee osteoarthritis? A randomized trial." *Osteoarthritis Cartilage* 13(1): 20-27.
3. Gudbergson, H., et al. (2011). "Radiographs and low field MRI (0.2T) as predictors of efficacy in a weight loss trial in obese women with knee osteoarthritis." *BMC Musculoskelet Disord* 12: 56.
4. Messier, S. P., et al. (2004). "Exercise and dietary weight loss in overweight and obese older adults with knee osteoarthritis: the Arthritis, Diet, and Activity Promotion Trial." *Arthritis Rheum* 50(5): 1501-1510.
5. Miller, G. D., et al. (2006). "Intensive weight loss program improves physical function in older obese adults with knee osteoarthritis." *Obesity (Silver Spring)* 14(7): 1219-1230.
6. Somers, T. J., et al. (2012). "Pain coping skills training and lifestyle behavioral weight management in patients with knee osteoarthritis: a randomized controlled study." *Pain* 153(6): 1199-1209.
7. Gill, R. S., et al. (2011). "The benefits of bariatric surgery in obese patients with hip and knee osteoarthritis: a systematic review." *Obes Rev* 12(12): 1083-1089.
8. Groen, V. A., et al. (2015). "Effects of bariatric surgery for knee complaints in (morbidly) obese adult patients: a systematic review." *Obes Rev* 16(2): 161-170.

#### **PICO 27. Acupuncture/UC compared to UC for knee and/or hip OA**

Summary. The literature searches identified 12 RCTs that compared acupuncture (or electroacupuncture) plus usual care to sham acupuncture and/or usual care in patients with knee OA.<sup>[1-12]</sup> Eight of the RCTs included a control group with a sham needle (penetrating or non-penetrating)<sup>[1-8]</sup>, and 10 included a usual care control group.<sup>[1,3-7,9-12]</sup> In a meta-analysis of 7 RCTs, acupuncture showed a small, statistically significant benefit over sham acupuncture for WOMAC pain and function at 6 to 12 weeks, but there was very high heterogeneity among study effect sizes. Five RCTs found no significant between-group difference in WOMAC pain at 26 weeks, and 3 RCTs showed no significant between-group difference in WOMAC pain at 1 year. Similarly, 5 RCTs found no significant between-group difference in WOMAC function at 26 weeks, and one RCT found no significant difference at 1 year. Two RCTs found no significant between-group difference in the six-minute walk test and one RCT found no difference in the TUG test. Meta-analysis of 2 RCTs found a significant elevation in serious adverse events in the acupuncture group relative to the sham control group (Table 1).

For acupuncture plus usual care versus usual care,<sup>[1,3-7,9-12]</sup> a meta-analysis of 7 RCTs found large between-group differences in WOMAC pain and function favoring acupuncture at 6 to 12 weeks. Although there was high heterogeneity in the effect sizes, the lower confidence limit around the summary effect still included a small-to-moderate size effect favoring acupuncture. Three RCTs collectively showed a small between-group difference in WOMAC pain that did not reach statistical significance at 26 weeks, and 3 RCTs showed no difference at 1 year. Similarly, 3 RCTs found a small between-group difference in WOMAC function favoring acupuncture at 26 weeks, and 3 RCTs showed no difference at 1 year. One



RCT found no significant between-group difference in six minute walk distance. Serious adverse events, increased knee pain, and injury did not differ significantly between acupuncture and usual care groups, but the findings were imprecise and therefore inconclusive (Table 2).

Three RCTs compared acupuncture to sham acupuncture in patients with hip OA.<sup>[12-14]</sup> For acupuncture versus sham, 2 RCTs found no significant between-group difference in pain or function at 4 to 6 weeks (Table 3).<sup>[13,14]</sup> For acupuncture plus usual care versus usual care, one RCT<sup>[12]</sup> found a large between-group difference in WOMAC pain and function favoring acupuncture at 3 months (Table 4). The data points for these studies were obtained from a systematic review by Manheimer et al., who had received unpublished data from the study authors.

Quality of evidence across all critical outcomes: Knee OA: Low for short-term and long-term outcomes. Hip OA: Low (short-term data only).

| <b>Table 1. Acupuncture compared to Sham Acupuncture for Knee OA</b> |                     |                      |                     |                      |                         |                                      |                              |                         |                                 |                                     |                                                                                      |
|----------------------------------------------------------------------|---------------------|----------------------|---------------------|----------------------|-------------------------|--------------------------------------|------------------------------|-------------------------|---------------------------------|-------------------------------------|--------------------------------------------------------------------------------------|
| <b>Certainty assessment</b>                                          |                     |                      |                     |                      |                         |                                      | <b>Summary of findings</b>   |                         |                                 |                                     |                                                                                      |
| <b>Nº of participants (studies) Follow-up</b>                        | <b>Risk of bias</b> | <b>Inconsistency</b> | <b>Indirectness</b> | <b>Imprecision</b>   | <b>Publication bias</b> | <b>Overall certainty of evidence</b> | <b>Study event rates (%)</b> |                         | <b>Relative effect (95% CI)</b> | <b>Anticipated absolute effects</b> |                                                                                      |
|                                                                      |                     |                      |                     |                      |                         |                                      | <b>With Sham Acupuncture</b> | <b>With Acupuncture</b> |                                 | <b>Risk with Sham Acupuncture</b>   | <b>Risk difference with Acupuncture</b>                                              |
| <b>WOMAC Pain (6-12 weeks)</b>                                       |                     |                      |                     |                      |                         |                                      |                              |                         |                                 |                                     |                                                                                      |
| 1617 (7 RCTs)                                                        | not serious         | serious <sup>a</sup> | not serious         | serious <sup>c</sup> | none                    | ⊕⊕○○<br>LOW                          | 843                          | 774                     | -                               | -                                   | SMD <b>0.44 lower</b><br>(0.81 lower to 0.07 lower)<br><br><b>Favors acupuncture</b> |
| <b>WOMAC Pain (26 weeks)</b>                                         |                     |                      |                     |                      |                         |                                      |                              |                         |                                 |                                     |                                                                                      |
| 1612 (5 RCTs)                                                        | not serious         | not serious          | not serious         | not serious          | none                    | ⊕⊕⊕⊕<br>HIGH                         | 250                          | 246                     | -                               | -                                   | SMD <b>0.06 lower</b><br>(0.18 lower to 0.07 higher)                                 |

**Table 1. Acupuncture compared to Sham Acupuncture for Knee OA**

| Certainty assessment                           |             |                      |             |                      |      | Summary of findings |      |      |   |   |                                                                                      |
|------------------------------------------------|-------------|----------------------|-------------|----------------------|------|---------------------|------|------|---|---|--------------------------------------------------------------------------------------|
| <b>WOMAC Pain (1 year)</b>                     |             |                      |             |                      |      |                     |      |      |   |   |                                                                                      |
| 204<br>(1 RCT)                                 | not serious | not serious          | not serious | serious <sup>b</sup> | none | ⊕⊕⊕○<br>MODERATE    | 105  | 99   | - | - | SMD <b>0.14 higher</b><br>(0.13 lower to 0.42 higher)                                |
| <b>WOMAC Function / SF-12 PCS (6-12 weeks)</b> |             |                      |             |                      |      |                     |      |      |   |   |                                                                                      |
| 2308<br>(8 RCTs)                               | not serious | serious <sup>a</sup> | not serious | serious <sup>c</sup> | none | ⊕⊕○○<br>LOW         | 1208 | 1100 | - | - | SMD <b>0.42 lower</b><br>(0.71 lower to 0.12 lower)<br><br><b>Favors acupuncture</b> |
| <b>WOMAC Function / SF-12 PCS (26 weeks)</b>   |             |                      |             |                      |      |                     |      |      |   |   |                                                                                      |
| 1623<br>(5 RCTs)                               | not serious | not serious          | not serious | not serious          | none | ⊕⊕⊕⊕<br>HIGH        | 615  | 572  | - | - | SMD <b>0.07 lower</b><br>(0.21 lower to 0.08 higher)                                 |
| <b>WOMAC Function (1 year)</b>                 |             |                      |             |                      |      |                     |      |      |   |   |                                                                                      |
| 205<br>(1 RCT)                                 | not serious | not serious          | not serious | serious <sup>b</sup> | none | ⊕⊕⊕○<br>MODERATE    | 105  | 100  | - | - | SMD <b>0.08 higher</b><br>(0.19 lower to 0.36 higher)                                |
| <b>6 minute walk distance (feet)</b>           |             |                      |             |                      |      |                     |      |      |   |   |                                                                                      |

**Table 1. Acupuncture compared to Sham Acupuncture for Knee OA**

| Certainty assessment |             |             |             |                        |      |                  | Summary of findings |                  |                                  |              |                                                                        |
|----------------------|-------------|-------------|-------------|------------------------|------|------------------|---------------------|------------------|----------------------------------|--------------|------------------------------------------------------------------------|
| 496<br>(2 RCTs)      | not serious | not serious | not serious | serious <sup>b,c</sup> | none | ⊕⊕⊕○<br>MODERATE | 250                 | 246              | -                                | -            | MD <b>30.03 lower</b><br>(79.2 lower to 19.13 higher)                  |
| <b>TUG (seconds)</b> |             |             |             |                        |      |                  |                     |                  |                                  |              |                                                                        |
| 455<br>(1 RCT)       | not serious | not serious | not serious | serious <sup>b</sup>   | none | ⊕⊕⊕○<br>MODERATE | 302                 | 153              | -                                | -            | MD <b>0</b><br>(0.88 lower to 0.88 higher)                             |
| <b>SAE</b>           |             |             |             |                        |      |                  |                     |                  |                                  |              |                                                                        |
| 1072<br>(2 RCTs)     | not serious | not serious | not serious | serious <sup>d</sup>   | none | ⊕⊕⊕○<br>MODERATE | 14/556<br>(2.5%)    | 34/516<br>(6.6%) | <b>OR 2.72</b><br>(1.44 to 5.14) | 25 per 1,000 | <b>40 more per 1,000</b><br>(11 more to 92 more)<br><b>Favors sham</b> |

**CI:** Confidence interval; **SMD:** Standardised mean difference; **MD:** Mean difference; **OR:** Odds ratio

*Explanations*

- a. High I<sup>2</sup>
- b. Crosses no effect line
- c. Wide CI
- d. Wide CI and small percentage of studies reported the outcome.

**Table 2. Acupuncture/UC compared to UC for Knee OA**

| Certainty assessment                   |              |               |              |             |                  |                               | Summary of findings   |                     |                          |                              |                                     |
|----------------------------------------|--------------|---------------|--------------|-------------|------------------|-------------------------------|-----------------------|---------------------|--------------------------|------------------------------|-------------------------------------|
| Nº of participants (studies) Follow-up | Risk of bias | Inconsistency | Indirectness | Imprecision | Publication bias | Overall certainty of evidence | Study event rates (%) |                     | Relative effect (95% CI) | Anticipated absolute effects |                                     |
|                                        |              |               |              |             |                  |                               | With UC               | With acupuncture/UC |                          | Risk with UC                 | Risk difference with acupuncture/UC |

**Table 2. Acupuncture/UC compared to UC for Knee OA**

| Certainty assessment                             |                      |                      |             |                      |      | Summary of findings |      |      |   |   |                                                                                      |
|--------------------------------------------------|----------------------|----------------------|-------------|----------------------|------|---------------------|------|------|---|---|--------------------------------------------------------------------------------------|
| <b>WOMAC pain at 6 to 12 weeks</b>               |                      |                      |             |                      |      |                     |      |      |   |   |                                                                                      |
| 1568<br>(7 RCTs)                                 | serious <sup>a</sup> | serious <sup>b</sup> | not serious | not serious          | none | ⊕⊕○○<br>LOW         | 710  | 858  | - | - | SMD <b>0.81 lower</b><br>(1.22 lower to 0.4 lower)<br><br><b>Favors acupuncture</b>  |
| <b>WOMAC pain at 26 wks</b>                      |                      |                      |             |                      |      |                     |      |      |   |   |                                                                                      |
| 1088<br>(3 RCTs)                                 | serious <sup>a</sup> | not serious          | not serious | serious <sup>c</sup> | none | ⊕⊕○○<br>LOW         | 108  | 142  | - | - | SMD <b>0.35 lower</b><br>(0.71 lower to 0.01 higher)                                 |
| <b>WOMAC pain at 1 yr followup, post scores</b>  |                      |                      |             |                      |      |                     |      |      |   |   |                                                                                      |
| 348<br>(3 RCTs)                                  | serious <sup>a</sup> | not serious          | not serious | serious <sup>c</sup> | none | ⊕⊕○○<br>LOW         | 175  | 173  | - | - | SMD <b>0.01 lower</b><br>(0.22 lower to 0.2 higher)                                  |
| <b>WOMAC function / SF-12 PCS at 6 to 12 wks</b> |                      |                      |             |                      |      |                     |      |      |   |   |                                                                                      |
| 2210<br>(8 RCTs)                                 | serious <sup>a</sup> | serious <sup>b</sup> | not serious | not serious          | none | ⊕⊕○○<br>LOW         | 1026 | 1184 | - | - | SMD <b>0.73 lower</b><br>(1.13 lower to 0.33 lower)<br><br><b>Favors acupuncture</b> |
| <b>WOMAC function / SF-12 PCS at 26 wks</b>      |                      |                      |             |                      |      |                     |      |      |   |   |                                                                                      |

**Table 2. Acupuncture/UC compared to UC for Knee OA**

| Certainty assessment                                        |                      |                      |             |                      |      |                  | Summary of findings |               |                                   |              |                                                                                      |
|-------------------------------------------------------------|----------------------|----------------------|-------------|----------------------|------|------------------|---------------------|---------------|-----------------------------------|--------------|--------------------------------------------------------------------------------------|
| 1093<br>(3 RCTs)                                            | serious <sup>a</sup> | not serious          | not serious | serious <sup>c</sup> | none | ⊕⊕○○<br>LOW      | 424                 | 468           | -                                 | -            | SMD <b>0.27 lower</b><br>(0.51 lower to 0.04 lower)<br><br><b>Favors acupuncture</b> |
| <b>WOMAC function at 1 yr followup</b>                      |                      |                      |             |                      |      |                  |                     |               |                                   |              |                                                                                      |
| 348<br>(3 RCTs)                                             | serious <sup>a</sup> | not serious          | not serious | serious <sup>c</sup> | none | ⊕⊕○○<br>LOW      | 174                 | 174           | -                                 | -            | SMD <b>0.01 lower</b><br>(0.22 lower to 0.2 higher)                                  |
| <b>6 minute walk distance (change from baseline - feet)</b> |                      |                      |             |                      |      |                  |                     |               |                                   |              |                                                                                      |
| 250<br>(1 RCT)                                              | serious <sup>a</sup> | not serious          | not serious | serious <sup>c</sup> | none | ⊕⊕○○<br>LOW      | 108                 | 142           | -                                 | -            | MD <b>77.8 higher</b><br>(11.43 lower to 167.03 higher)                              |
| <b>50m walk time (seconds)</b>                              |                      |                      |             |                      |      |                  |                     |               |                                   |              |                                                                                      |
| 104<br>(1 RCT)                                              | serious <sup>a</sup> | not serious          | not serious | serious <sup>c</sup> | none | ⊕⊕○○<br>LOW      | 52                  | 52            | -                                 | -            | MD <b>3.5 lower</b><br>(11.76 lower to 4.76 higher)                                  |
| <b>Increased knee pain</b>                                  |                      |                      |             |                      |      |                  |                     |               |                                   |              |                                                                                      |
| 813<br>(3 RCTs)                                             | serious <sup>a</sup> | serious <sup>c</sup> | not serious | serious <sup>c</sup> | none | ⊕○○○<br>VERY LOW | 10/402<br>(2.5%)    | 13/411 (3.2%) | <b>OR 2.37</b><br>(0.26 to 21.26) | 25 per 1,000 | <b>32 more per 1,000</b><br>(18 fewer to 327 more)                                   |
| <b>SAEs</b>                                                 |                      |                      |             |                      |      |                  |                     |               |                                   |              |                                                                                      |

**Table 2. Acupuncture/UC compared to UC for Knee OA**

| Certainty assessment |             |             |             |                      |      |                  | Summary of findings |               |                                  |              |                                                  |
|----------------------|-------------|-------------|-------------|----------------------|------|------------------|---------------------|---------------|----------------------------------|--------------|--------------------------------------------------|
| 1245<br>(3 RCTs)     | not serious | not serious | not serious | serious <sup>c</sup> | none | ⊕⊕⊕○<br>MODERATE | 27/579<br>(4.7%)    | 37/666 (5.6%) | <b>OR 1.17</b><br>(0.54 to 2.52) | 47 per 1,000 | <b>7 more per 1,000</b><br>(21 fewer to 63 more) |
| <b>Injury</b>        |             |             |             |                      |      |                  |                     |               |                                  |              |                                                  |
| 672<br>(2 RCTs)      | not serious | not serious | not serious | serious <sup>c</sup> | none | ⊕⊕⊕○<br>MODERATE | 1/331<br>(0.3%)     | 1/341 (0.3%)  | <b>OR 0.99</b><br>(0.10 to 9.79) | 3 per 1,000  | <b>0 fewer per 1,000</b><br>(3 fewer to 26 more) |

CI: Confidence interval; SMD: Standardised mean difference; MD: Mean difference; OR: Odds ratio

*Explanations*

- a. Comparison cannot be blinded
- b. High I<sup>2</sup>
- c. Wide CI that crosses no effect line

**Table 3. Acupuncture compared to sham for hip OA**

| Certainty assessment                      |                      |               |              |                      |                  |                               | Summary of findings   |                  |                          |                              |                                                      |
|-------------------------------------------|----------------------|---------------|--------------|----------------------|------------------|-------------------------------|-----------------------|------------------|--------------------------|------------------------------|------------------------------------------------------|
| Nº of participants (studies)<br>Follow-up | Risk of bias         | Inconsistency | Indirectness | Imprecision          | Publication bias | Overall certainty of evidence | Study event rates (%) |                  | Relative effect (95% CI) | Anticipated absolute effects |                                                      |
|                                           |                      |               |              |                      |                  |                               | With sham (hip)       | With Acupuncture |                          | Risk with sham (hip)         | Risk difference with Acupuncture                     |
| <b>VAS Pain (4 to 6 weeks)</b>            |                      |               |              |                      |                  |                               |                       |                  |                          |                              |                                                      |
| 120<br>(2 studies)                        | serious <sup>a</sup> | not serious   | not serious  | serious <sup>b</sup> | none             | ⊕⊕○○<br>LOW                   | 58                    | 62               | -                        | -                            | <b>SMD 0.13 lower</b><br>(0.49 lower to 0.22 higher) |
| <b>Function (4 to 6 weeks)</b>            |                      |               |              |                      |                  |                               |                       |                  |                          |                              |                                                      |

**Table 3. Acupuncture compared to sham for hip OA**

| Certainty assessment |                      |             |             |                      |      |             | Summary of findings |    |   |   |                                                      |
|----------------------|----------------------|-------------|-------------|----------------------|------|-------------|---------------------|----|---|---|------------------------------------------------------|
| 120<br>(2 studies)   | serious <sup>a</sup> | not serious | not serious | serious <sup>b</sup> | none | ⊕⊕○○<br>LOW | 58                  | 62 | - | - | SMD <b>0.15 lower</b><br>(0.51 lower to 0.21 higher) |

CI: Confidence interval; SMD: Standardized mean difference

*Explanations*

- a. Investigators not blinded to treatment (performance bias)
- b. Wide 95% CI overlaps with line of no effect

**Table 4. Acupuncture/UC compared to UC for hip OA**

| Certainty assessment                     |                      |               |              |                      |                  |                               | Summary of findings   |                     |                          |                              |                                                                                      |
|------------------------------------------|----------------------|---------------|--------------|----------------------|------------------|-------------------------------|-----------------------|---------------------|--------------------------|------------------------------|--------------------------------------------------------------------------------------|
| № of participants (studies)<br>Follow-up | Risk of bias         | Inconsistency | Indirectness | Imprecision          | Publication bias | Overall certainty of evidence | Study event rates (%) |                     | Relative effect (95% CI) | Anticipated absolute effects |                                                                                      |
|                                          |                      |               |              |                      |                  |                               | With UC (hip)         | With Acupuncture/UC |                          | Risk with UC (hip)           | Risk difference with Acupuncture/UC                                                  |
| <b>WOMAC pain (3 months)</b>             |                      |               |              |                      |                  |                               |                       |                     |                          |                              |                                                                                      |
| 137<br>(1 study)                         | serious <sup>a</sup> | not serious   | not serious  | serious <sup>b</sup> | none             | ⊕⊕○○<br>LOW                   | 64                    | 73                  | -                        | -                            | SMD <b>1.21 lower</b><br>(1.58 lower to 0.84 lower)<br><br><b>Favors acupuncture</b> |
| <b>WOMAC function (3 months)</b>         |                      |               |              |                      |                  |                               |                       |                     |                          |                              |                                                                                      |

**Table 4. Acupuncture/UC compared to UC for hip OA**

| Certainty assessment |                      |             |             |                      |      |             | Summary of findings |    |   |   |                                                                                      |
|----------------------|----------------------|-------------|-------------|----------------------|------|-------------|---------------------|----|---|---|--------------------------------------------------------------------------------------|
| 137<br>(1 study)     | serious <sup>a</sup> | not serious | not serious | serious <sup>b</sup> | none | ⊕⊕○○<br>LOW | 64                  | 73 | - | - | SMD <b>1.17 lower</b><br>(1.54 lower to 0.81 lower)<br><br><b>Favors acupuncture</b> |

CI: Confidence interval; SMD: Standardized mean difference

*Explanations*

- a. No blinding
- b. Single study with large effect size

**References**

1. Berman BM, Lao L, Langenberg P, Lee WL, Gilpin AM, Hochberg MC: Effectiveness of acupuncture as adjunctive therapy in osteoarthritis of the knee: A randomized, controlled trial. *Ann Intern Med* 2004;141:901-910.
2. Vas J, Mendez C, Perea-Milla E, Vega E, Panadero MD, Leon JM, Borge MA, Gaspar O, Sanchez-Rodriguez F, Aguilar I, Jurado R: Acupuncture as a complementary therapy to the pharmacological treatment of osteoarthritis of the knee: Randomised controlled trial. *BMJ* 2004; 329:1216.
3. Scharf HP, Mansmann U, Streitberger K, Witte S, Kramer J, Maier C, et al. Acupuncture and knee osteoarthritis: a three-armed randomized trial. *Ann Intern Med.* 2006;145(1):12-20.
4. Witt C, Brinkhaus B, Jena S, Linde K, Streng A, Wagenpfeil S, et al. Acupuncture in patients with osteoarthritis of the knee: a randomised trial. *Lancet.* 2005;366(9480):136-143.
5. Foster NE, Thomas E, Barlas P, Hill JC, Young J, Mason E, Hay EM: Acupuncture as an adjunct to exercise based physiotherapy for osteoarthritis of the knee: Randomised controlled trial. *BMJ* 2007; 335:436.
6. Suarez-Almazor ME, Looney C, Liu Y, Cox V, Pietz K, Marcus DM, Street RL Jr: A randomized controlled trial of acupuncture for osteoarthritis of the knee: Effects of patient-provider communication. *Arthritis Care Res* 2010; 62:1229-1236.
7. Mavrommatis CI, Argyra E, Vadalouka A, Vasilakos DG. Acupuncture as an adjunctive therapy to pharmacological treatment in patients with chronic pain due to osteoarthritis of the knee: A 3-armed, randomized, placebo-controlled trial. *Pain* 153:1720-1726.



8. Chen LX, Mao JJ, Fernandes S, Galantino ML, Guo W, Lariccia P, Teal VL, Bowman MA, Schumacher HR, Farrar JT: Integrating acupuncture with exercise-based physical therapy for knee osteoarthritis: A randomized controlled trial. *J Clin Rheumatol* 19:308-316, 2013.
9. Williamson L, Wyatt MR, Yein K, Melton JT: Severe knee osteoarthritis: A randomized controlled trial of acupuncture, physiotherapy (supervised exercise) and standard management for patients awaiting knee replacement. *Rheumatology* 2007; 46:1445-1449.
10. Hinman RS, McCrory P, Pirotta M, Relf I, Forbes A, Crossley KM, et al. Acupuncture for chronic knee pain: a randomized clinical trial. *JAMA*. 2014;312(13):1313-1322.
11. Lansdown H, Howard K, Brealey S, MacPherson H. Acupuncture for pain and osteoarthritis of the knee: a pilot study for an open parallel-arm randomised controlled trial. *BMC Musculoskelet Disord*. 2009;10:130.
12. Witt CM, Jena S, Brinkhaus B, Liecker B, Wegscheider K, Willich SN. Acupuncture in patients with osteoarthritis of the knee or hip: a randomized, controlled trial with an additional nonrandomized arm. *Arthritis Rheum*. 2006;54(11):3485-3493.
13. White P, Bishop FL, Prescott P, Scott C, Little P, Lewith G: Practice, practitioner, or placebo? A multifactorial, mixed methods randomized controlled trial of acupuncture. *Pain* 2012; 153:455-462.
14. Fink MG, Wipperman B, Gehrke A. Non-specific effects of traditional Chinese acupuncture in osteoarthritis of the hip. *Complementary Ther Med* 2001; 9:82-9.

#### **PICO 28. Mind body practices plus UC compared to UC for hip and knee OA**

Summary. The literature searches identified 10 RCTs and one systematic review that compared various mind-body practices plus usual care to usual care alone in patients with hip and/or knee OA. Each mind-body practice was evaluated in a separate analysis (Tables 1-8).

Table 1 presents evidence from 7 RCTs that compared the efficacy of Tai chi and usual care to usual care alone in patients with knee and/or hip OA.<sup>[1-7]</sup> Fransen et al.<sup>[2]</sup> was the only study that included some patients with hip OA, all others exclusively enrolled patients with knee OA. Meta-analyses of the 7 RCTs found a significant between-group difference favoring tai chi over usual care alone for improvement in WOMAC pain and function at 8 to 24 weeks follow-up. Only one small RCT evaluated WOMAC pain and function at 1-year follow-up,<sup>[6]</sup> and the finding was inconclusive due to a wide 95% CI that included the possibility of no difference between groups. A few RCTs also found evidence for a significant benefit favoring tai chi in improvement in objective function measures (chair stand, timed up and go, and 6 meter walk test). The overall quality of evidence was moderate due to serious risk of bias in some studies.

Table 2 presents evidence from two RCTs that compared Yoga plus usual care to usual care in 91 patients with knee OA.<sup>[8,9]</sup> Collectively these studies found significant improvement in WOMAC pain and function, chair stands, and timed fast walking at 8 weeks favoring Yoga over usual

care. The quality of evidence was moderate due to serious risk of bias (patients not blinded). A systematic review of Yoga in patients with knee OA did not alter these findings (Table 9).<sup>[10]</sup> Similarly, an additional RCT identified in a literature search update in August 2018 did not alter these findings.<sup>[13]</sup>

Table 3 presents evidence from one RCT that compared hypnosis plus usual care to usual care in 21 patients with knee and/or hip OA.<sup>[11]</sup> At 6 months following treatment, the study found no significant between-group difference in VAS pain scores. The quality of evidence was low due to serious risk of bias (patients not blinded) and serious imprecision in the effect estimate (wide 95% CI that included the possibility of a between-group difference) that rendered the results inconclusive. Table 4 found the same results from a comparison of relaxation and usual care in the same trial.

Tables 5-7 present evidence from one RCT comparing external qigong therapy (EQT) plus usual care to sham therapy plus usual care in 112 patients with knee OA.<sup>[12]</sup> The study used two healers, one of whom was considered more effective than the other. Results were reported together for increased pain and separately for each healer for time to walk 50 feet at 3 months. The number of patients with increased pain did not differ significantly between groups (Table 6), but the finding was inconclusive due to a wide 95% CI that includes the possibility of a between-group difference. Walking time over 50 feet significantly favored EQT when administered by the more effective healer (Table 7), but showed no significant between-group difference when administered by the less effective healer (Table 8). Similarly, WOMAC pain and function were substantially decreased by the more effective healer compared to the less effective healer (Table 9) The quality of evidence was low due to serious risk of bias (no allocation concealment) and serious imprecision for increased pain.

Quality of evidence across all critical outcomes: Moderate for Tai Chi and Yoga; Low for hypnosis, relaxation, and EQT

| <b>Table 1. Tai chi/UC compared to UC for hip and knee OA</b> |                     |                      |                     |                    |                         |                                      |                            |                        |                                 |                                     |                                        |
|---------------------------------------------------------------|---------------------|----------------------|---------------------|--------------------|-------------------------|--------------------------------------|----------------------------|------------------------|---------------------------------|-------------------------------------|----------------------------------------|
| <b>Certainty assessment</b>                                   |                     |                      |                     |                    |                         |                                      | <b>Summary of findings</b> |                        |                                 |                                     |                                        |
| <b>Nº of participants (studies) Follow-up</b>                 | <b>Risk of bias</b> | <b>Inconsistency</b> | <b>Indirectness</b> | <b>Imprecision</b> | <b>Publication bias</b> | <b>Overall certainty of evidence</b> | <b>Number of patients</b>  |                        | <b>Relative effect (95% CI)</b> | <b>Anticipated absolute effects</b> |                                        |
|                                                               |                     |                      |                     |                    |                         |                                      | <b>With UC for knee OA</b> | <b>With tai chi/UC</b> |                                 | <b>Risk with UC for knee OA</b>     | <b>Risk difference with tai chi/UC</b> |
| <b>WOMAC pain, at 8 to 24 weeks</b>                           |                     |                      |                     |                    |                         |                                      |                            |                        |                                 |                                     |                                        |

**Table 1. Tai chi/UC compared to UC for hip and knee OA**

| Certainty assessment                                                             |                      |             |             |                      |      |                  | Summary of findings |     |   |   |                                                                                  |
|----------------------------------------------------------------------------------|----------------------|-------------|-------------|----------------------|------|------------------|---------------------|-----|---|---|----------------------------------------------------------------------------------|
| 350<br>(7 RCTs)                                                                  | serious <sup>a</sup> | not serious | not serious | not serious          | none | ⊕⊕⊕○<br>MODERATE | 137                 | 173 | - | - | SMD <b>0.59 lower</b><br>(0.89 lower to 0.29 lower)<br><br><b>Favors Tai Chi</b> |
| <b>WOMAC pain at 1 yr, change score (lower scores indicate improvement)</b>      |                      |             |             |                      |      |                  |                     |     |   |   |                                                                                  |
| 40<br>(1 RCT)                                                                    | not serious          | not serious | not serious | serious <sup>b</sup> | none | ⊕⊕⊕○<br>MODERATE | 20                  | 20  | - | - | SMD <b>0.46 lower</b><br>(1.09 lower to 0.17 higher)                             |
| <b>WOMAC function at 8 to 24 weeks (lower scores indicate improvement)</b>       |                      |             |             |                      |      |                  |                     |     |   |   |                                                                                  |
| 350<br>(7 RCTs)                                                                  | serious <sup>a</sup> | not serious | not serious | not serious          | none | ⊕⊕⊕○<br>MODERATE | 137                 | 173 | - | - | SMD <b>0.67 lower</b><br>(0.89 lower to 0.46 lower)<br><br><b>Favors Tai Chi</b> |
| <b>WOMAC function at 1 yr, change scores (lower scores indicate improvement)</b> |                      |             |             |                      |      |                  |                     |     |   |   |                                                                                  |

**Table 1. Tai chi/UC compared to UC for hip and knee OA**

| Certainty assessment                                                                                |             |             |             |                      |      |                  | Summary of findings |    |   |   |                                                                                  |
|-----------------------------------------------------------------------------------------------------|-------------|-------------|-------------|----------------------|------|------------------|---------------------|----|---|---|----------------------------------------------------------------------------------|
| 40<br>(1 RCT)                                                                                       | not serious | not serious | not serious | serious <sup>b</sup> | none | ⊕⊕⊕○<br>MODERATE | 20                  | 20 | - | - | SMD <b>0.36 lower</b><br>(0.99 lower to 0.26 higher)                             |
| <b>chair stand test (seconds) at 12 to 21 wks, change score (lower scores indicate improvement)</b> |             |             |             |                      |      |                  |                     |    |   |   |                                                                                  |
| 95<br>(2 RCTs)                                                                                      | not serious | not serious | not serious | serious <sup>b</sup> | none | ⊕⊕⊕○<br>MODERATE | 47                  | 48 | - | - | SMD <b>0.88 lower</b><br>(1.84 lower to 0.08 higher)                             |
| <b>chair stand at 1 yr, change score, time in seconds (lower scores indicate improvement)</b>       |             |             |             |                      |      |                  |                     |    |   |   |                                                                                  |
| 40<br>(1 RCT)                                                                                       | not serious | not serious | not serious | serious <sup>c</sup> | none | ⊕⊕⊕○<br>MODERATE | 20                  | 20 | - | - | MD <b>5.98 lower</b><br>(10.73 lower to 1.23 lower)<br><br><b>Favors Tai Chi</b> |
| <b>Timed up and go test, change scores at 12-21 weeks (lower scores indicate improvement)</b>       |             |             |             |                      |      |                  |                     |    |   |   |                                                                                  |

**Table 1. Tai chi/UC compared to UC for hip and knee OA**

| Certainty assessment                                                                         |                      |             |             |                      |      |                  | Summary of findings |    |   |   |                                                                                |
|----------------------------------------------------------------------------------------------|----------------------|-------------|-------------|----------------------|------|------------------|---------------------|----|---|---|--------------------------------------------------------------------------------|
| 198<br>(3 RCTs)                                                                              | serious <sup>d</sup> | not serious | not serious | not serious          | none | ⊕⊕⊕○<br>MODERATE | 68                  | 84 | - | - | MD <b>0.56 lower</b><br>(0.93 lower to 0.18 lower)<br><b>Favors Tai Chi</b>    |
| <b>6 meter (seconds) walk test at wk 8, change score (lower scores indicate improvement)</b> |                      |             |             |                      |      |                  |                     |    |   |   |                                                                                |
| 44<br>(1 RCT)                                                                                | serious <sup>d</sup> | not serious | not serious | serious <sup>c</sup> | none | ⊕⊕○○<br>LOW      | 15                  | 29 | - | - | MD <b>1.4 lower</b><br>(2.14 lower to 0.66 lower)<br><b>Favors Tai Chi</b>     |
| <b>gait velocity at 24 weeks (higher scores indicate improvement)</b>                        |                      |             |             |                      |      |                  |                     |    |   |   |                                                                                |
| 40<br>(1 RCT)                                                                                | serious <sup>a</sup> | not serious | not serious | serious <sup>b</sup> | none | ⊕⊕○○<br>LOW      | 19                  | 21 | - | - | MD <b>8.4 higher</b><br>(1.33 higher to 15.47 higher)<br><b>Favors Tai Chi</b> |

CI: Confidence interval; MD: Mean difference; SMD: Standardised mean difference

**Explanations**

- a. Patients not blinded in 3 studies
- b. Wide 95% CI that overlaps line of no effect
- c. Small study with wide 95% CI
- d. Patients not blinded

| <b>Table 2. Yoga/UC compared to UC for hip and knee OA</b>                                                    |                      |                      |                     |                    |                         |                                      |                              |                     |                                 |                                     |                                                                         |
|---------------------------------------------------------------------------------------------------------------|----------------------|----------------------|---------------------|--------------------|-------------------------|--------------------------------------|------------------------------|---------------------|---------------------------------|-------------------------------------|-------------------------------------------------------------------------|
| <b>Certainty assessment</b>                                                                                   |                      |                      |                     |                    |                         |                                      | <b>Summary of findings</b>   |                     |                                 |                                     |                                                                         |
| <b>No of participants (studies) Follow-up</b>                                                                 | <b>Risk of bias</b>  | <b>Inconsistency</b> | <b>Indirectness</b> | <b>Imprecision</b> | <b>Publication bias</b> | <b>Overall certainty of evidence</b> | <b>Study event rates (%)</b> |                     | <b>Relative effect (95% CI)</b> | <b>Anticipated absolute effects</b> |                                                                         |
|                                                                                                               |                      |                      |                     |                    |                         |                                      | <b>With UC</b>               | <b>With yoga/UC</b> |                                 | <b>Risk with UC</b>                 | <b>Risk difference with yoga/UC</b>                                     |
| <b>WOMAC pain at 8 weeks, post scores (0-20, lower scores indicate improvement)</b>                           |                      |                      |                     |                    |                         |                                      |                              |                     |                                 |                                     |                                                                         |
| 91 (2 RCTs)                                                                                                   | serious <sup>a</sup> | not serious          | not serious         | not serious        | none                    | ⊕⊕⊕○<br>MODERATE                     | 41                           | 50                  | -                               | -                                   | MD <b>1.8 lower</b><br>(2.93 lower to 0.68 lower)<br><b>Favors yoga</b> |
| <b>WOMAC function at 8 weeks, post scores (0-68, lower scores indicate improvement)</b>                       |                      |                      |                     |                    |                         |                                      |                              |                     |                                 |                                     |                                                                         |
| 91 (2 RCTs)                                                                                                   | serious <sup>a</sup> | not serious          | not serious         | not serious        | none                    | ⊕⊕⊕○<br>MODERATE                     | 41                           | 50                  | -                               | -                                   | MD <b>6.14 lower</b><br>(9.68 lower to 2.6 lower)<br><b>Favors yoga</b> |
| <b>repeated chair stands at 8 weeks, post score (from the SPPB test) (higher scores indicate improvement)</b> |                      |                      |                     |                    |                         |                                      |                              |                     |                                 |                                     |                                                                         |

**Table 2. Yoga/UC compared to UC for hip and knee OA**

| Certainty assessment                                                                                      |                      |             |             |             |      |                  | Summary of findings |    |   |   |                                                                            |
|-----------------------------------------------------------------------------------------------------------|----------------------|-------------|-------------|-------------|------|------------------|---------------------|----|---|---|----------------------------------------------------------------------------|
| 91<br>(2 RCTs)                                                                                            | serious <sup>a</sup> | not serious | not serious | not serious | none | ⊕⊕⊕○<br>MODERATE | 41                  | 50 | - | - | MD <b>0.6 higher</b><br>(0.23 higher to 0.98 higher)<br><b>Favors yoga</b> |
| <b>timed 8 foot walk at 8 weeks, post score (from the SPPB test) (higher scores indicate improvement)</b> |                      |             |             |             |      |                  |                     |    |   |   |                                                                            |
| 91<br>(2 RCTs)                                                                                            | serious <sup>a</sup> | not serious | not serious | not serious | none | ⊕⊕⊕○<br>MODERATE | 41                  | 50 | - | - | MD <b>0.4 higher</b><br>(0.21 higher to 0.59 higher)<br><b>Favors yoga</b> |

CI: Confidence interval; MD: Mean difference

### Explanations

a. Patients not blinded; outcome assessor blinded in at least 1 study

**Table 3. Hypnosis/UC compared to wait list control/UC for hip and knee OA for hip and knee OA**

| Certainty assessment |  |               |              |             |                  | Summary of findings |                    |                 |                              |
|----------------------|--|---------------|--------------|-------------|------------------|---------------------|--------------------|-----------------|------------------------------|
| Nº of participant    |  | Inconsistency | Indirectness | Imprecision | Publication bias | Overall certainty   | Number of patients | Relative effect | Anticipated absolute effects |

| <b>Table 3. Hypnosis/UC compared to wait list control/UC for hip and knee OA for hip and knee OA</b> |                      |             |             |                      |      |                            |                                                      |                         |                 |                                                           |                                                     |  |
|------------------------------------------------------------------------------------------------------|----------------------|-------------|-------------|----------------------|------|----------------------------|------------------------------------------------------|-------------------------|-----------------|-----------------------------------------------------------|-----------------------------------------------------|--|
| <b>Certainty assessment</b>                                                                          |                      |             |             |                      |      |                            | <b>Summary of findings</b>                           |                         |                 |                                                           |                                                     |  |
| <b>Studies (studies) Follow-up</b>                                                                   | <b>Risk of bias</b>  |             |             |                      |      | <b>Quality of evidence</b> | <b>With wait list control/UC for hip and knee OA</b> | <b>With hypnosis/UC</b> | <b>(95% CI)</b> | <b>Risk with wait list control/UC for hip and knee OA</b> | <b>Risk difference with hypnosis/UC</b>             |  |
| <b>pain VAS at 6 months post scores (0-10, lower scores indicate improvement)</b>                    |                      |             |             |                      |      |                            |                                                      |                         |                 |                                                           |                                                     |  |
| 21 (1 RCT)                                                                                           | serious <sup>a</sup> | not serious | not serious | serious <sup>b</sup> | none | ⊕⊕○<br>○<br>LOW            | 10                                                   | 11                      | -               | -                                                         | <b>MD 1.93 lower</b><br>(4.01 lower to 0.15 higher) |  |

CI: Confidence interval; MD: Mean difference

### Explanations

- a. Patients not blinded, allocation concealment and outcome assessment not reported
- b. Wide 95% CI that overlaps line of no effect

| <b>Table 4. Relaxation/UC compared to wait list/UC for hip and knee OA</b> |                     |                      |                     |                    |                         |                                      |                            |                           |                                 |                                     |                                           |  |
|----------------------------------------------------------------------------|---------------------|----------------------|---------------------|--------------------|-------------------------|--------------------------------------|----------------------------|---------------------------|---------------------------------|-------------------------------------|-------------------------------------------|--|
| <b>Certainty assessment</b>                                                |                     |                      |                     |                    |                         |                                      | <b>Summary of findings</b> |                           |                                 |                                     |                                           |  |
| <b>No of participants (studies) Follow-up</b>                              | <b>Risk of bias</b> | <b>Inconsistency</b> | <b>Indirectness</b> | <b>Imprecision</b> | <b>Publication bias</b> | <b>Overall certainty of evidence</b> | <b>Number of patients</b>  |                           | <b>Relative effect (95% CI)</b> | <b>Anticipated absolute effects</b> |                                           |  |
|                                                                            |                     |                      |                     |                    |                         |                                      | <b>With wait list/UC</b>   | <b>With relaxation/UC</b> |                                 | <b>Risk with wait list/UC</b>       | <b>Risk difference with relaxation/UC</b> |  |
|                                                                            |                     |                      |                     |                    |                         |                                      |                            |                           |                                 |                                     |                                           |  |



**Table 4. Relaxation/UC compared to wait list/UC for hip and knee OA**

| Certainty assessment                                                        |                      |             |             |                      |      |             | Summary of findings |    |   |   |                                                     |
|-----------------------------------------------------------------------------|----------------------|-------------|-------------|----------------------|------|-------------|---------------------|----|---|---|-----------------------------------------------------|
| pain VAS at 6 months, post scores (0-10, lower scores indicate improvement) |                      |             |             |                      |      |             |                     |    |   |   |                                                     |
| 21<br>(1 RCT)                                                               | serious <sup>a</sup> | not serious | not serious | serious <sup>b</sup> | none | ⊕⊕○○<br>LOW | 10                  | 11 | - | - | MD <b>1.51 lower</b><br>(3.27 lower to 0.25 higher) |

CI: Confidence interval; MD: Mean difference

**Explanations**

- a. Patients not blinded, allocation concealment and blinded outcome assessment not reported
- b. Wide 95% CI that overlaps line of no effect

**Table 5. EQT/UC compared to UC (both effective and noneffective healers combined) for hip and knee OA**

| Certainty assessment                   |              |               |              |             |                  |                               | Summary of findings                                        |             |                          |                                                                 |                             |
|----------------------------------------|--------------|---------------|--------------|-------------|------------------|-------------------------------|------------------------------------------------------------|-------------|--------------------------|-----------------------------------------------------------------|-----------------------------|
| No of participants (studies) Follow-up | Risk of bias | Inconsistency | Indirectness | Imprecision | Publication bias | Overall certainty of evidence | Number of patients                                         |             | Relative effect (95% CI) | Anticipated absolute effects                                    |                             |
|                                        |              |               |              |             |                  |                               | With UC (both effective and noneffective healers combined) | With EQT/UC |                          | Risk with UC (both effective and noneffective healers combined) | Risk difference with EQT/UC |
| <b>increased pain</b>                  |              |               |              |             |                  |                               |                                                            |             |                          |                                                                 |                             |

**Table 5. EQT/UC compared to UC (both effective and noneffective healers combined) for hip and knee OA**

| Certainty assessment |                      |             |             |                      |      |                 | Summary of findings |             |                                   |              |                                          |
|----------------------|----------------------|-------------|-------------|----------------------|------|-----------------|---------------------|-------------|-----------------------------------|--------------|------------------------------------------|
| 112<br>(1 RCT)       | serious <sup>a</sup> | not serious | not serious | serious <sup>b</sup> | none | ⊕⊕○<br>○<br>LOW | 2/52 (3.8%)         | 5/60 (8.3%) | <b>OR 2.27</b><br>(0.42 to 12.24) | 38 per 1,000 | 45 more per 1,000 (22 fewer to 290 more) |

CI: Confidence interval; OR: Odds ratio

### Explanations

a. No allocation concealment

b. Wide 95% CI that overlaps line of no effect

**Table 6. EQT (more effective healer)/UC compared to UC for hip and knee OA**

| Certainty assessment                   |              |               |              |             |                  |                               | Summary of findings |                                     |                          |                              |                                                     |
|----------------------------------------|--------------|---------------|--------------|-------------|------------------|-------------------------------|---------------------|-------------------------------------|--------------------------|------------------------------|-----------------------------------------------------|
| No of participants (studies) Follow-up | Risk of bias | Inconsistency | Indirectness | Imprecision | Publication bias | Overall certainty of evidence | Number of patients  |                                     | Relative effect (95% CI) | Anticipated absolute effects |                                                     |
|                                        |              |               |              |             |                  |                               | With UC             | With EQT (more effective healer)/UC |                          | Risk with UC                 | Risk difference with EQT (more effective healer)/UC |

time (seconds) to walk 50 feet at 3 months, post scores (lower scores indicate improvement)

**Table 6. EQT (more effective healer)/UC compared to UC for hip and knee OA**

| Certainty assessment |                      |             |             |             |      |                  | Summary of findings |    |   |   |                                                                        |
|----------------------|----------------------|-------------|-------------|-------------|------|------------------|---------------------|----|---|---|------------------------------------------------------------------------|
| 61<br>(1 RCT)        | serious <sup>a</sup> | not serious | not serious | not serious | none | ⊕⊕⊕○<br>MODERATE | 49                  | 12 | - | - | MD <b>1.8 lower</b><br>(2.84 lower to 0.76 lower)<br><b>Favors EQT</b> |

CI: Confidence interval; MD: Mean difference

## Explanations

a. No allocation concealment

**Table 7. EQT/UC (less effective healer) compared to UC for hip and knee OA**

| Certainty assessment                                                                           |                      |               |              |             |                  |                               | Summary of findings |                                     |                          |                              |                                                     |
|------------------------------------------------------------------------------------------------|----------------------|---------------|--------------|-------------|------------------|-------------------------------|---------------------|-------------------------------------|--------------------------|------------------------------|-----------------------------------------------------|
| № of participants (studies)<br>Follow-up                                                       | Risk of bias         | Inconsistency | Indirectness | Imprecision | Publication bias | Overall certainty of evidence | Number of patients  |                                     | Relative effect (95% CI) | Anticipated absolute effects |                                                     |
|                                                                                                |                      |               |              |             |                  |                               | With UC             | With EQT/UC (less effective healer) |                          | Risk with UC                 | Risk difference with EQT/UC (less effective healer) |
| <b>time (seconds) to walk 50 feet, 3 month post scores (lower scores indicate improvement)</b> |                      |               |              |             |                  |                               |                     |                                     |                          |                              |                                                     |
| 94<br>(1 RCT)                                                                                  | serious <sup>a</sup> | not serious   | not serious  | not serious | none             | ⊕⊕⊕○<br>MODERATE              | 49                  | 45                                  | -                        | -                            | MD <b>0.3 lower</b><br>(1.34 lower to 0.74 higher)  |

CI: Confidence interval; MD: Mean difference

## Explanations

- a. No allocation concealment

**Table 8. Systematic review and RCT data not suitable for effect size calculation or combining with other data**

| Ref ID, Author, year | Study type        | Duration                                                                                                                                                                                                                                  | Population Description                                                          | Treatment given to relevant population                                                                                                                                                                                                                                                                                                                                                                                                                                                                                                                                                                                                                                       | Results                                                                                                                                                                                                                                                                                                                                                                                                                                                                                                                                                                                                                                                                                                                                                                                                                                                                                                                                                                                                                                                                                                                                                                                                                                                                                                                                                                                                                                                                                                                                                                                                                                                                                                                                                                                                                                                                                                                       |
|----------------------|-------------------|-------------------------------------------------------------------------------------------------------------------------------------------------------------------------------------------------------------------------------------------|---------------------------------------------------------------------------------|------------------------------------------------------------------------------------------------------------------------------------------------------------------------------------------------------------------------------------------------------------------------------------------------------------------------------------------------------------------------------------------------------------------------------------------------------------------------------------------------------------------------------------------------------------------------------------------------------------------------------------------------------------------------------|-------------------------------------------------------------------------------------------------------------------------------------------------------------------------------------------------------------------------------------------------------------------------------------------------------------------------------------------------------------------------------------------------------------------------------------------------------------------------------------------------------------------------------------------------------------------------------------------------------------------------------------------------------------------------------------------------------------------------------------------------------------------------------------------------------------------------------------------------------------------------------------------------------------------------------------------------------------------------------------------------------------------------------------------------------------------------------------------------------------------------------------------------------------------------------------------------------------------------------------------------------------------------------------------------------------------------------------------------------------------------------------------------------------------------------------------------------------------------------------------------------------------------------------------------------------------------------------------------------------------------------------------------------------------------------------------------------------------------------------------------------------------------------------------------------------------------------------------------------------------------------------------------------------------------------|
| 3115<br>Kan, 2016    | Systematic review | "A total of 9 articles (6 studies) were included (Six articles (three RCTs), one quasi-RCT], and two single group pre-post studies) were included. The most common yoga protocol is 40~90 minutes/session, lasting for at least 8 weeks." | 372 patients with knee OA. The mean age of subjects varied from 51 to 71 years. | <p>Comparators: three had a control group which did conventional exercise during the experimental time, in another study both groups were treated with EMG biofeedback, knee muscle strengthening exercises, and Transcutaneous Electrical Nerve Stimulation (TENS), and the yoga group received additionally Iyengar Yoga, and the remaining two studies did not have control group.</p> <p>Yoga: 8 weeks in four studies and 12-weeks in two studies. Almost every study had 3-4 sessions per week with each session varying from 60 to 90 minutes. The type of yoga practice in three studies all consisted of asana movement), pranayama (breathing), and meditation</p> | <p>"Relevant articles were identified using the following databases: Medline (1966 to Jul 2015; via Ovid), EMBASE (1980 to Jul 2015; via Ovid), the Cochrane Central Register of Controlled Trials (CENTRAL) (The Cochrane Library, Issue 7 of 12 Jul 2015), Pubmed (1966 to Jul 2015), and Physiotherapy Evidence Database (PEDro) (1929 to Jul 2015; via website)."</p> <p>The methodological quality was assessed using the Downs and Black's Quality Index, which consists of 27 items. A score of 23 or higher indicates good-quality, a score between 22 and 13 indicates medium-quality, and a score of 12 or lower represents a poor-quality article with high risk of bias. The results of the quality assessment were: one good-quality, seven medium-quality articles and one trial was poor-quality article.</p> <p><b>WOMAC pain</b><br/>Both studies (one single group pre-post study and a two group comparison) reporting this outcome found significant improvements compared to baseline and between groups, respectively.</p> <p><b>VAS pain</b><br/>Four studies reported VAS pain. Three out of four studies found positive results for yoga. In one study there was a significant difference in pain both within (<math>p &lt; 0.001</math>) and between groups (<math>p &lt; 0.001</math>) after the 3-month yoga intervention combined with physiotherapy with higher effect size in the yoga group than in the control group (therapeutic exercise with physiotherapy). In another study, the yoga group showed a more reduced VAS (56.83%) than control group (38.15%) after 8 weeks of intervention and the pre- and postintervention ratings of VAS score showed a statistically significant reduction of pain intensity in yoga group compared with control group (<math>p &lt; 0.05</math>). In a third study, pre- and postintervention scores had a significant improvement in pain after</p> |

|                       |     |          |                           |                                                                                                                                               |                                                                                                                                                                                                                                                                                                                                                                                                                                                                                                                                                                                                                                                                                                                                                                                                                                                                                                                                                                                                                                                 |
|-----------------------|-----|----------|---------------------------|-----------------------------------------------------------------------------------------------------------------------------------------------|-------------------------------------------------------------------------------------------------------------------------------------------------------------------------------------------------------------------------------------------------------------------------------------------------------------------------------------------------------------------------------------------------------------------------------------------------------------------------------------------------------------------------------------------------------------------------------------------------------------------------------------------------------------------------------------------------------------------------------------------------------------------------------------------------------------------------------------------------------------------------------------------------------------------------------------------------------------------------------------------------------------------------------------------------|
|                       |     |          |                           | (relaxation), the type of yoga practiced in other two studies was asana (movement), and the last study did not mention the yoga type studied. | <p>12 weeks of yoga based exercise, and in the fourth study no significant differences were detected in pain between the 8-week yoga group and the control group (home-based activities); however, the pre-post scores showed a significant difference in the yoga group but not in the control group.</p> <p><b>Mobility</b><br/>Three studies assessed mobility, with mixed results. In one trial, there was a significant difference in walking time within and between groups after 12 weeks of intervention with higher effect size in the yoga than in the control group. In a second study, the 50-foot walk time was unchanged after 8 weeks of yoga exercise. In the third study, a Six-Minute Walk Test (6MWT), a 30-second chair stand test (30 s CST), and a stair-climbing protocol were used to assess mobility. The pre- to postintervention scores showed a significant improvement when measured with 6MWT and 30s CST after 12 weeks of yoga intervention, but no significant change could be detected in stair-climbing.</p> |
| 2883<br>Chen,<br>2008 | RCT | 3 months | 112 patients with knee OA | External Qigong Therapy (administered by 2 different healers and reported separately by healer) vs sham                                       | <p>WOMAC pain and function results were presented in a graph without SD/measure of variance for the followup visits</p> <p><b>WOMAC pain</b><br/>Sham<br/>Baseline (n=52) 49.9 (SD=20.2)<br/>3 month followup (n=42) 35 (SD=NR)<br/>Healer 1 (less effective healer)<br/>Baseline (n=47) 51.6 (SD=21.4)<br/>3 month followup (n=39) 37 (SD=NR)<br/>Healer 2 (more effective healer)<br/>Baseline (n=13) 45 (SD= 18.6)<br/>3 month followup (n=11) 19 (SD=NR)</p> <p><b>WOMAC function</b><br/>Sham<br/>Baseline (n=52) 55.3 (SD=19.1)<br/>3 month followup (n=42) 41 (SD=NR)<br/>Healer 1 (less effective healer)<br/>Baseline (n=47) 50.5 (SD=21.5)<br/>3 month followup (n=39) 38 (SD=NR)<br/>Healer 2 (more effective healer)<br/>Baseline (n=13) 46.5 (SD = 20.7)<br/>3 month followup (n=11) 21 (SD=NR)</p>                                                                                                                                                                                                                                |

## References

1. Brismee JM, Paige RL, Chyu MC, Boatright JD, Hagar JM, McCaleb JA, et al. Group and home-based tai chi in elderly subjects with knee osteoarthritis: a randomized controlled trial. *Clin Rehabil.* 2007;21(2):99-111.
2. Fransen M, Nairn L, Winstanley J, Lam P, Edmonds J. Physical activity for osteoarthritis management: a randomized controlled clinical trial evaluating hydrotherapy or Tai Chi classes. *Arthritis Rheum.* 2007;57(3):407-414.
3. Lee HJ, Park HJ, Chae Y, Kim SY, Kim SN, Kim ST, et al. Tai Chi Qigong for the quality of life of patients with knee osteoarthritis: a pilot, randomized, waiting list controlled trial. *Clin Rehabil.* 2009;23(6):504-511.
4. Song R, Lee EO, Lam P, Bae SC. Effects of tai chi exercise on pain, balance, muscle strength, and perceived difficulties in physical functioning in older women with osteoarthritis: a randomized clinical trial. *J Rheumatol.* 2003;30(9):2039-2044.
5. Tsai PF, Chang JY, Beck C, Kuo YF, Keefe FJ. A pilot cluster-randomized trial of a 20-week Tai Chi program in elders with cognitive impairment and osteoarthritic knee: effects on pain and other health outcomes. *J Pain Symptom Manage.* 2013;45(4):660-669.
6. Wang C, Schmid CH, Hibberd PL, Kalish R, Roubenoff R, Rones R, et al. Tai Chi is effective in treating knee osteoarthritis: a randomized controlled trial. *Arthritis Rheum.* 2009;61(11):1545-1553.
7. Zhu Q, Huang L, Wu X, Wang L, Zhang Y, Fang M, Liu Y, Li JX. Effects of Tai Ji Quan training on gait kinematics in older Chinese women with knee osteoarthritis: A randomized controlled trial. *J Sport Health Sci* 2016; 5:297–303
8. Cheung C, Wyman JF, Resnick B, Savik K. Yoga for managing knee osteoarthritis in older women: a pilot randomized controlled trial. *BMC Complement Altern Med.* 2014;14:160.
9. Cheung C, Wyman JF, Bronas U, McCarthy T, Rudser K, Mathiason MA. Managing knee osteoarthritis with yoga or aerobic/strengthening exercise programs in older adults: a pilot randomized controlled trial. *Rheumatol Int.* 2017;37(3):389-398.
10. Kan L, Zhang J, Yang Y, Wang P. The Effects of Yoga on Pain, Mobility, and Quality of Life in Patients with Knee Osteoarthritis: A Systematic Review. *Evid Based Complement Alternat Med.* 2016;2016:6016532.
11. Gay MC, Philippot P, Luminet O. Differential effectiveness of psychological interventions for reducing osteoarthritis pain: a comparison of Erikson [correction of Erickson] hypnosis and Jacobson relaxation. *Eur J Pain.* 2002;6(1):1-16.
12. Chen KW, Perlman A, Liao JG, Lam A, Staller J, Sigal LH. Effects of external qigong therapy on osteoarthritis of the knee. A randomized controlled trial. *Clin Rheumatol.* 2008;27(12):1497-1505.
13. Deepeshwar S, Tanwar M, Kavuri V, and Budhi RB. Effect of Yoga Based Lifestyle Intervention on Patients With Knee Osteoarthritis: A Randomized Controlled Trial. *Front Psych* 2018; 9:180.

**PICO 29: Cane and usual care compared to usual care alone for knee OA.**

Evidence Summary: One RCT by Jones et al.<sup>1</sup> evaluated the effect of cane use in addition to usual care for knee OA in a RCT. Compared to the control group, those who used a cane for two months reported significantly greater improvement in pain and self-reported function. Performance on the 6-minute walk test did not differ significantly between groups, but the estimate is imprecise with wide confidence intervals.

Quality of evidence: Moderate

| <b>Cane compared to Usual Care for Knee OA</b>                             |                      |                      |                     |                    |                         |                                      |                                    |                  |                                 |                                         |                                                                           |
|----------------------------------------------------------------------------|----------------------|----------------------|---------------------|--------------------|-------------------------|--------------------------------------|------------------------------------|------------------|---------------------------------|-----------------------------------------|---------------------------------------------------------------------------|
| <b>Certainty assessment</b>                                                |                      |                      |                     |                    |                         |                                      | <b>Summary of findings</b>         |                  |                                 |                                         |                                                                           |
| <b>№ of participants (studies) Follow-up</b>                               | <b>Risk of bias</b>  | <b>Inconsistency</b> | <b>Indirectness</b> | <b>Imprecision</b> | <b>Publication bias</b> | <b>Overall certainty of evidence</b> | <b>Number of patients</b>          |                  | <b>Relative effect (95% CI)</b> | <b>Anticipated absolute effects</b>     |                                                                           |
|                                                                            |                      |                      |                     |                    |                         |                                      | <b>With Usual Care for Knee OA</b> | <b>With Cane</b> |                                 | <b>Risk with Usual Care for Knee OA</b> | <b>Risk difference with Cane</b>                                          |
| <b>VAS Pain (0-10, lower scores indicate improvement)</b>                  |                      |                      |                     |                    |                         |                                      |                                    |                  |                                 |                                         |                                                                           |
| 64 (1 RCT)                                                                 | serious <sup>a</sup> | not serious          | not serious         | not serious        | none                    | ⊕⊕⊕○<br>MODERATE                     | 32                                 | 32               | -                               | -                                       | MD <b>2.11 lower</b> (2.81 lower to 1.41 lower)<br><br><b>Favors cane</b> |
| <b>SF-36 Physical Function (0-100, higher scores indicate improvement)</b> |                      |                      |                     |                    |                         |                                      |                                    |                  |                                 |                                         |                                                                           |

| Cane compared to Usual Care for Knee OA                 |                      |             |             |                      |      |                     |    |    |   |   |                                                                              |
|---------------------------------------------------------|----------------------|-------------|-------------|----------------------|------|---------------------|----|----|---|---|------------------------------------------------------------------------------|
| Certainty assessment                                    |                      |             |             |                      |      | Summary of findings |    |    |   |   |                                                                              |
| 64<br>(1 RCT)                                           | serious <sup>a</sup> | not serious | not serious | not serious          | none | ⊕⊕⊕○<br>MODERATE    | 32 | 32 | - | - | MD <b>9.06 higher</b><br>(0.67 higher to 17.45 higher)<br><b>Favors cane</b> |
| 6-minute Walk Test (higher scores indicate improvement) |                      |             |             |                      |      |                     |    |    |   |   |                                                                              |
| 64<br>(1 RCT)                                           | serious <sup>a</sup> | not serious | not serious | serious <sup>b</sup> | none | ⊕⊕○○<br>LOW         | 32 | 32 | - | - | MD <b>6.5 lower</b><br>(24.06 lower to 11.06 higher)                         |

CI: Confidence interval; MD: Mean difference

## Explanations

- a. Participants and PTs not blinded, outcome assessor was blinded
- b. Wide confidence interval

## References

1. Jones A, Silva PG, Silva AC, et al. Impact of cane use on pain, function, general health and energy expenditure during gait in patients with knee osteoarthritis: a randomised controlled trial. *Ann Rheum Dis.* 2012;71(2):172-179.

PICO 30: Heat application, including ultrasound, for knee OA



**Summary:** There were 18 original RCTs evaluating the effectiveness of heat in the management of knee OA, 11 of them included assessment of therapeutic ultrasound. All RCTs provided direct evidence for therapeutic heat effects compared with various control scenarios.

Eight studies reported the effects of heat application (hot water or hot packs) or diathermy on knee OA pain (Yildirim et al, Atamaz et al, Aciksoz et al, Giombini et al, Branko et al, Rattanachaiyanont et al, Lim et al, Cetin et al). All diathermy studies were double-blind (Atamaz et al, Giombini et al, Rattanachaiyanont et al), and hot water/hot pack application studies were not blinded. Study duration varied between 3 weeks and 10 weeks. Pain outcomes in most studies included WOMAC pain, one study assessed pain by visual analog scale only (Cetin et al). Most studies found no significant improvement in OA pain with heat application or diathermy. One diathermy study (Giombini et al) and one hot water application study (Branko et al) favored intervention. One additional study of hot pack applications showed no difference in WOMAC pain, but a small difference in VAS favoring intervention (Aciksoz et al). Six studies reported WOMAC function outcomes (Yildirim et al, Atamaz et al, Aciksoz et al, Giombini et al, Branko et al, Rattanachaiyanont et al). Of these, three studies favored intervention, and three reported null results. There was one systematic review of RCTs (Loeffer et al) that assessed adverse events of thermal diathermy. This review found no significant adverse events of diathermy, although reporting of adverse events was limited to one study.

All but two of the eleven ultrasound RCTs (Kulcu et al, Cetin et al) were double-blinded. There were variations in ultrasound protocols (continuous vs pulsed, duration of application, intensity, application field). Study duration varied from 1 week to 8 weeks. Five studies reported WOMAC pain, of these two favored intervention (Ozgonenel et al, Kulsu et al), and three reported null results (Loyola-Sanchez et al, Cakir et al, Ulus et al). Ten studies reported pain by VAS, of these six favored intervention (Ozgonenel et al, Yildiiz et al, Jia et al, Tascioglu et al, Yang et al, Kulcu et al), and four reported null results (Cetin et al, Cakir et al, Ulus et al, Falconer et al). Four studies reported WOMAC function scores. Of these, two reported no significant difference between ultrasound and sham (Loyola-Sanchez et al, Ulus et al), and the other two (Ozgonenel et al, Kulcu et al) favored intervention. Of note, the study by Kulcu et al that favored intervention for all pain and function outcomes was non-blinded. Seven studies included reporting of adverse events (Ulus et al, Ozgonenel et al, Tascioglu et al, Falconer et al, Jia et al, Loyola-Sanchez et al, Yang et al). All but one study reported no adverse events. The study by Yang et al reported “mental stress, dizziness, or palpitations” in three patients, these resolved quickly after treatment was stopped.

Quality of evidence across all critical outcomes: Low

| <b>Table 1. Hot packs, Diathermy compared to UC for Knee OA</b> |  |                      |                     |                    |                         |                          |                            |  |                                     |
|-----------------------------------------------------------------|--|----------------------|---------------------|--------------------|-------------------------|--------------------------|----------------------------|--|-------------------------------------|
| <b>Certainty assessment</b>                                     |  |                      |                     |                    |                         |                          | <b>Summary of findings</b> |  |                                     |
| <b>№ of participants</b>                                        |  | <b>Inconsistency</b> | <b>Indirectness</b> | <b>Imprecision</b> | <b>Publication bias</b> | <b>Overall certainty</b> | <b>Number of patients</b>  |  | <b>Anticipated absolute effects</b> |
|                                                                 |  |                      |                     |                    |                         |                          |                            |  |                                     |

**Table 1. Hot packs, Diathermy compared to UC for Knee OA**

| <b>Table 1. Hot packs, Diathermy compared to UC for Knee OA</b> |                             |                      |             |             |      |                        |                            |                                          |                                         |                         |                                                                                            |
|-----------------------------------------------------------------|-----------------------------|----------------------|-------------|-------------|------|------------------------|----------------------------|------------------------------------------|-----------------------------------------|-------------------------|--------------------------------------------------------------------------------------------|
| <b>Certainty assessment</b>                                     |                             |                      |             |             |      |                        | <b>Summary of findings</b> |                                          |                                         |                         |                                                                                            |
| <b>(studies)<br/>Follow-up</b>                                  | <b>Risk<br/>of<br/>bias</b> |                      |             |             |      | <b>of<br/>evidence</b> | <b>With<br/>UC</b>         | <b>With hot<br/>packs,<br/>Diathermy</b> | <b>Relative<br/>effect<br/>(95% CI)</b> | <b>Risk<br/>with UC</b> | <b>Risk<br/>difference<br/>with hot<br/>packs,<br/>Diathermy</b>                           |
| <b>WOMAC pain (0-20, lower scores indicate improvement)</b>     |                             |                      |             |             |      |                        |                            |                                          |                                         |                         |                                                                                            |
| 422<br>(6 RCTs)                                                 | serious <sup>a</sup>        | serious <sup>b</sup> | not serious | not serious | none | ⊕⊕○○<br>LOW            | 209                        | 213                                      | -                                       | -                       | MD <b>3.22<br/>lower</b><br>(7.01 lower<br>to 0.58<br>higher)                              |
| <b>Pain by VAS (0-10, lower scores indicate improvement)</b>    |                             |                      |             |             |      |                        |                            |                                          |                                         |                         |                                                                                            |
| 159<br>(3 RCTs)                                                 | serious <sup>a</sup>        | not serious          | not serious | not serious | none | ⊕⊕⊕○<br>MODERATE       | 79                         | 80                                       | -                                       | -                       | MD <b>0.63<br/>lower</b><br>(1.18 lower<br>to 0.08<br>lower)<br><br><b>Favors<br/>heat</b> |
| <b>WOMAC Function (0-68, lower scores indicate improvement)</b> |                             |                      |             |             |      |                        |                            |                                          |                                         |                         |                                                                                            |
| 422<br>(6 RCTs)                                                 | serious <sup>a</sup>        | serious <sup>c</sup> | not serious | not serious | none | ⊕⊕○○<br>LOW            | 209                        | 213                                      | -                                       | -                       | MD <b>11.39<br/>lower</b><br>(23.29<br>lower to<br>0.52<br>higher)                         |

**CI:** Confidence interval; **MD:** Mean difference

## Explanations

- a. Patients not blinded in most trials, outcome assessors blinded in some
- b. two studies favoring intervention and four studies with null result
- c. Two studies with markedly higher effect size favoring intervention

| <b>Table 2. Ultrasound compared to UC for Knee OA</b>        |                     |                      |                     |                      |                         |                                      |                            |                        |                                 |                                     |                                                                                   |
|--------------------------------------------------------------|---------------------|----------------------|---------------------|----------------------|-------------------------|--------------------------------------|----------------------------|------------------------|---------------------------------|-------------------------------------|-----------------------------------------------------------------------------------|
| <b>Certainty assessment</b>                                  |                     |                      |                     |                      |                         |                                      | <b>Summary of findings</b> |                        |                                 |                                     |                                                                                   |
| <b>Nº of participants (studies) Follow-up</b>                | <b>Risk of bias</b> | <b>Inconsistency</b> | <b>Indirectness</b> | <b>Imprecision</b>   | <b>Publication bias</b> | <b>Overall certainty of evidence</b> | <b>Number of patients</b>  |                        | <b>Relative effect (95% CI)</b> | <b>Anticipated absolute effects</b> |                                                                                   |
|                                                              |                     |                      |                     |                      |                         |                                      | <b>With UC</b>             | <b>With Ultrasound</b> |                                 | <b>Risk with UC</b>                 | <b>Risk difference with Ultrasound</b>                                            |
| <b>WOMAC pain (0-20, lower scores indicate improvement)</b>  |                     |                      |                     |                      |                         |                                      |                            |                        |                                 |                                     |                                                                                   |
| 171 (4 RCTs)                                                 | not serious         | not serious          | not serious         | serious <sup>a</sup> | none                    | ⊕⊕⊕○<br>MODERATE                     | 85                         | 86                     | -                               | -                                   | MD <b>2.2 lower</b><br>(3.28 lower to 1.12 lower)<br><br><b>Favors ultrasound</b> |
| <b>Pain by VAS (0-10, lower scores indicate improvement)</b> |                     |                      |                     |                      |                         |                                      |                            |                        |                                 |                                     |                                                                                   |

**Table 2. Ultrasound compared to UC for Knee OA**

| Certainty assessment                                            |             |             |             |                      |      |                  | Summary of findings |     |   |   |                                                                                    |
|-----------------------------------------------------------------|-------------|-------------|-------------|----------------------|------|------------------|---------------------|-----|---|---|------------------------------------------------------------------------------------|
| 391<br>(7 RCTs)                                                 | not serious | not serious | not serious | not serious          | none | ⊕⊕⊕⊕<br>HIGH     | 193                 | 198 | - | - | MD <b>0.89 lower</b><br>(1.29 lower to 0.49 lower)<br><br><b>Favors ultrasound</b> |
| <b>WOMAC function (0-68, lower scores indicate improvement)</b> |             |             |             |                      |      |                  |                     |     |   |   |                                                                                    |
| 132<br>(3 RCTs)                                                 | not serious | not serious | not serious | serious <sup>a</sup> | none | ⊕⊕⊕○<br>MODERATE | 66                  | 66  | - | - | MD <b>3.92 lower</b><br>(7.49 lower to 0.35 lower)<br><br><b>Favors ultrasound</b> |

CI: Confidence interval; MD: Mean difference

### Explanations

a. Wide confidence intervals

**Table 3. RCT data not suitable for effect size calculation or combining with other data**

| Ref ID, Author, year | Study type | Duration | Population Description | Treatment given to relevant population | Results |
|----------------------|------------|----------|------------------------|----------------------------------------|---------|
|                      |            |          |                        |                                        |         |

|                     |                                           |           |                                                         |                                                                                                                                                                 |                                                                                                                                                                                                                                                                                                                                                                                                                                                                                                                                                                    |
|---------------------|-------------------------------------------|-----------|---------------------------------------------------------|-----------------------------------------------------------------------------------------------------------------------------------------------------------------|--------------------------------------------------------------------------------------------------------------------------------------------------------------------------------------------------------------------------------------------------------------------------------------------------------------------------------------------------------------------------------------------------------------------------------------------------------------------------------------------------------------------------------------------------------------------|
| 2774 Lim, 2013      | Non-blinded RCT                           | 8 weeks   | 44 patients with chronic stroke + knee OA               | Leg immersion into warm whirlpool for 30 min 5 times a week for 8 weeks vs usual activities; 30 min of physical therapy with every session in both groups       | <p>WOMAC pain:</p> <p>Intervention group:<br/>Pre-intervention 15 (SD 3.74); post-intervention 11.1 (4.64)</p> <p>Control group:<br/>Pre-intervention 13.37 (SD 2.12); post-intervention 9.75 (1.35)</p>                                                                                                                                                                                                                                                                                                                                                           |
| 2527 Falconer, 1992 | Double blind RCT                          | 4-6 weeks | 74 Knee OA patients                                     | Ultrasound 1MHz 12 treatments 2-3 times a week over 4-6 weeks vs identical sham protocol. Both groups received 30 min of stretching and strengthening exercises | <p>Results for VAS reported in a graph and approximated from graph here:</p> <p>Pain by VAS in the US group (cm):<br/>Pre-intervention 4.4 (SE 0.5); post-intervention 2.8 (0.5)</p> <p>Control group:<br/>Pre-intervention 6.2 (SE 0.5); post-intervention 3.9 (0.5)</p>                                                                                                                                                                                                                                                                                          |
| 3495 Yang, 2011     | RCT with sham, but blinding not described | 5 days?   | 87 patients with knee OA (100 knees randomized)         | ultrasound treatment 35 min vs sham, for 5 sessions (seems daily from the figures, but not clearly stated)                                                      | <p>Pain reported as "VAS efficacy index", described as (VAS score pre-treatment - VAS after treatment)/VAS pre-treatment*100:</p> <p>Treatment group VAS efficacy index: mean = 0.3640, SD = 0.28062<br/>Control group VAS efficacy index: mean = 0.1000, SD = 0.18729<br/>P for between-group rank sum test &lt;0.001</p>                                                                                                                                                                                                                                         |
| 7271 Kulcu, 2009    | non-blinded RCT                           | 3 weeks   | 45 patients with knee OA, who did not respond to NSAIDs | Continuous ultrasound 10 min vs no treatment vs electromagnetic field therapy 35 min; 15 sessions in 3 weeks                                                    | <p>Pain by VAS and WOMAC, median (range):</p> <p>VAS:<br/>US group (N = 15) pre-treatment 7 (5-10); post-treatment 2 (0-6).<br/>Control group (N = 15) pre-treatment 7 (4-9); post-treatment 5 (2-10).</p> <p>WOMAC Pain<br/>US group (N = 15) pre-treatment 9.5 (1-17); post-treatment 4.5 (0-11).<br/>Control group (N = 15) pre-treatment 7 (5-9); post-treatment 8 (5-9).</p> <p>WOMAC Function<br/>US group (N = 15) pre-treatment 31 (6-41); post-treatment 11.5 (0-26).<br/>Control group (N = 15) pre-treatment 25 (17-35); post-treatment 24 (18-30).</p> |

## References:

Aciksoz, S., et al. (2017). "The effect of self-administered superficial local hot and cold application methods on pain, functional status and quality of life in primary knee osteoarthritis patients." J Clin Nurs 26(23-24): 5179-5190.

- Atamaz, F. C., et al. (2012). "Comparison of the efficacy of transcutaneous electrical nerve stimulation, interferential currents, and shortwave diathermy in knee osteoarthritis: a double-blind, randomized, controlled, multicenter study." *Arch Phys Med Rehabil* 93(5): 748-756.
- Branco, M., et al. (2016). "Bath thermal waters in the treatment of knee osteoarthritis: a randomized controlled clinical trial." *Eur J Phys Rehabil Med* 52(4): 422-430.
- Giombini, A., et al. (2011). "Localized hyperthermia induced by microwave diathermy in osteoarthritis of the knee: a randomized placebo-controlled double-blind clinical trial." *Knee Surg Sports Traumatol Arthrosc* 19(6): 980-987.
- Lim, K. O., et al. (2013). "The effects of a warm whirlpool bath on pain and stiffness of patients with chronic stroke induced knee osteoarthritis." *J Phys Ther Sci* 25(7): 873-875.
- Rattanachaiyanont, M. and V. Kuptniratsaikul (2008). "No additional benefit of shortwave diathermy over exercise program for knee osteoarthritis in peri-/post-menopausal women: an equivalence trial." *Osteoarthritis Cartilage* 16(7): 823-828.
- Yildirim, N., et al. (2010). "The effect of heat application on pain, stiffness, physical function and quality of life in patients with knee osteoarthritis." *J Clin Nurs* 19(7-8): 1113-1120.
- Cetin, N., et al. (2008). "Comparing hot pack, short-wave diathermy, ultrasound, and TENS on isokinetic strength, pain, and functional status of women with osteoarthritic knees: a single-blind, randomized, controlled trial." *Am J Phys Med Rehabil* 87(6): 443-451.
- Laufer, Y. and G. Dar (2012). "Effectiveness of thermal and athermal short-wave diathermy for the management of knee osteoarthritis: a systematic review and meta-analysis." *Osteoarthritis Cartilage* 20(9): 957-966.
- Cakir, S., et al. (2014). "Efficacy of therapeutic ultrasound for the management of knee osteoarthritis: a randomized, controlled, and double-blind study." *Am J Phys Med Rehabil* 93(5): 405-412.
- Falconer, J., et al. (1992). "Effect of ultrasound on mobility in osteoarthritis of the knee. A randomized clinical trial." *Arthritis Care Res* 5(1): 29-35.
- Jia, L., et al. (2016). "Efficacy of focused low-intensity pulsed ultrasound therapy for the management of knee osteoarthritis: a randomized, double blind, placebo-controlled trial." *Sci Rep* 6: 35453.
- Loyola-Sanchez, A., et al. (2012). "Effect of low-intensity pulsed ultrasound on the cartilage repair in people with mild to moderate knee osteoarthritis: a double-blinded, randomized, placebo-controlled pilot study." *Arch Phys Med Rehabil* 93(1): 35-42.
- Ozgonenel, L., et al. (2009). "A double-blind trial of clinical effects of therapeutic ultrasound in knee osteoarthritis." *Ultrasound Med Biol* 35(1): 44-49.

Tascioglu, F., et al. (2010). "Short-term effectiveness of ultrasound therapy in knee osteoarthritis." *J Int Med Res* 38(4): 1233-1242.

Ulus, Y., et al. (2012). "Therapeutic ultrasound versus sham ultrasound for the management of patients with knee osteoarthritis: a randomized double-blind controlled clinical study." *Int J Rheum Dis* 15(2): 197-206.

Yang, P. F., et al. (2011). "Efficacy of ultrasound in the treatment of osteoarthritis of the knee." *Orthop Surg* 3(3): 181-187.

Yildiz, S. K. et al. (2015). "The Effectiveness of Ultrasound Treatment for the Management of Knee Osteoarthritis: A Randomized, Placebo-Controlled, Double-Blind Study." *Turkish Journal of Medical Sciences* 45 (6): 1187–91.

Kulcu, D., et al (2009). "Short-term efficacy of pulsed electromagnetic field therapy on pain and functional level in knee osteoarthritis: a randomized controlled study / Diz osteoarthritisinde pulse elektromanyetik alan tedavisinin agri ve fonksiyonellik uzerine kisa donemde etkisi, randomize kontrollu calisma." *The Free Library*, [https://www.thefreelibrary.com/Short-term efficacy of pulsed electromagnetic field therapy on pain...-a0292882211](https://www.thefreelibrary.com/Short-term+efficacy+of+pulsed+electromagnetic+field+therapy+on+pain...-a0292882211) (accessed July 03 2018)

### **PICO 31. Therapeutic cooling plus usual care compare to usual care for patients with hip or knee OA**

Summary: There were 3 original RCTs evaluating the effectiveness of therapeutic cooling in the management of knee OA. All RCTs provided direct evidence for therapeutic cooling effects on knee OA pain and function.

All studies were single-blind RCTs, and used slightly different cold application protocols. Aciksoz et al<sup>1</sup> applied cold compresses for 20 min twice a day for 3 weeks, Elsaman et al<sup>2</sup> applied cold compresses for 10 min daily for 2 weeks, and Pietrosimone et al<sup>3</sup> studied a single 20 min ice bag application with same day outcome assessment. Control conditions also varied between studies: pill placebo (Elsaman et al<sup>2</sup>), and no intervention (Aciksoz et al<sup>1</sup>, Pietrosimone et al<sup>3</sup>). Aciksoz et al<sup>1</sup> allowed standard OA care including NSAIDs in all groups.

All studies reported pain with movement by VAS. Combined analysis of the three studies found a significant improvement in this outcome favoring cooling. Only one study reported WOMAC pain and function (Aciksoz et al), and found no significant difference between control and intervention for both outcomes. None of the studies reported on adverse events related to cold application.

Quality of evidence across all critical outcomes: Low

## Cold application compared to control for Knee OA

| Cold application compared to control for Knee OA                         |                      |               |              |                      |                  |                               |                       |                       |                          |                              |                                                                                      |
|--------------------------------------------------------------------------|----------------------|---------------|--------------|----------------------|------------------|-------------------------------|-----------------------|-----------------------|--------------------------|------------------------------|--------------------------------------------------------------------------------------|
| Certainty assessment                                                     |                      |               |              |                      |                  |                               | Summary of findings   |                       |                          |                              |                                                                                      |
| Nº of participants (studies) Follow-up                                   | Risk of bias         | Inconsistency | Indirectness | Imprecision          | Publication bias | Overall certainty of evidence | Study event rates (%) |                       | Relative effect (95% CI) | Anticipated absolute effects |                                                                                      |
|                                                                          |                      |               |              |                      |                  |                               | With control          | With Cold application |                          | Risk with control            | Risk difference with Cold application                                                |
| <b>Pain with movement, VAS (0-10, lower scores indicate improvement)</b> |                      |               |              |                      |                  |                               |                       |                       |                          |                              |                                                                                      |
| 187 (3 RCTs)                                                             | serious <sup>a</sup> | not serious   | not serious  | not serious          | none             | ⊕⊕⊕○<br>MODERATE              | 94                    | 93                    | -                        | -                            | MD <b>1.02 lower</b><br>(1.65 lower to 0.38 lower)<br><b>Favors cold application</b> |
| <b>WOMAC Pain (0-10, lower scores indicate improvement)</b>              |                      |               |              |                      |                  |                               |                       |                       |                          |                              |                                                                                      |
| 64 (1 RCT)                                                               | serious <sup>a</sup> | not serious   | not serious  | serious <sup>b</sup> | none             | ⊕⊕○○<br>LOW                   | 32                    | 32                    | -                        | -                            | MD <b>0.11 higher</b><br>(1 lower to 1.22 higher)                                    |
| <b>WOMAC Function (0-10, lower scores indicate improvement)</b>          |                      |               |              |                      |                  |                               |                       |                       |                          |                              |                                                                                      |
| 64 (1 RCT)                                                               | serious <sup>a</sup> | not serious   | not serious  | serious <sup>b</sup> | none             | ⊕⊕○○<br>LOW                   | 32                    | 32                    | -                        | -                            | MD <b>0.06 higher</b><br>(0.89 lower to 1.01 higher)                                 |



**CI:** Confidence interval; **MD:** Mean difference

### *Explanations*

- a. Participants not blinded
- b. Single small study

### **References:**

1. Aciksoz, S., et al. (2017). "The effect of self-administered superficial local hot and cold application methods on pain, functional status and quality of life in primary knee osteoarthritis patients." *J Clin Nurs* 26(23-24): 5179-5190.
2. Elsaman, A. M., et al. (2016). "Low-dose Spironolactone: Treatment for Osteoarthritis-related Knee Effusion. A Prospective Clinical and Sonographic-based Study." *J Rheumatol* 43(6): 1114-1120.
3. Pietrosimone, B. G., et al. (2009). "Immediate effects of transcutaneous electrical nerve stimulation and focal knee joint cooling on quadriceps activation." *Med Sci Sports Exerc* 41(6): 1175-1181.

### **PICO 32: TENS plus usual care vs usual care in Knee OA.**

Summary. The literature search identified 12 trials that addressed this comparison. Three studies<sup>(1-3)</sup> examined VAS pain at 4-8 week TENS therapy intervals. While heterogeneity was low overall, the results did not show significant benefit from TENS. Similarly, WOMAC pain and physical function did not show significant improvements with TENS in 2 studies<sup>(1, 4)</sup>. In 2 other studies<sup>(5, 6)</sup>, TENS therapy was given and VAS pain was assessed immediately afterward without significant heterogeneity or benefit. Another study<sup>(7)</sup> compared the same group of patients using sequential phases in therapy, but there was no true control. In Law, et al<sup>(8)</sup>, 3 different TENS groups were compared to placebo, but the goal of the study was to compare relative effectiveness of different TENS frequencies. A non-randomized continuous trial<sup>(9)</sup>, the same pts were studied in 2 sequential phases with high dropout, not ITT, and the pain outcome was a non PICO scale. Five studies<sup>(8-12)</sup> were charted in a Word table, as the data was not suitable for RevMan.

Overall, no significant benefit was noted with TENS for VAS pain, WOMAC pain, or WOMAC function in patients with knee OA. The quality of the data was low, with small groups and variable control (sham TENS, exercise, varying TENS currents and different duration of sessions with TENS), making data difficult to compare across studies.

Quality of evidence across all critical outcomes: Low

**Table 1. TENS+Usual Care compared to Usual Care for Hip and Knee OA**

| Certainty assessment                                                                   |                      |               |              |                      |                  |                               | Summary of findings |                       |                          |                              |                                                     |
|----------------------------------------------------------------------------------------|----------------------|---------------|--------------|----------------------|------------------|-------------------------------|---------------------|-----------------------|--------------------------|------------------------------|-----------------------------------------------------|
| No of participants (studies)<br>Follow-up                                              | Risk of bias         | Inconsistency | Indirectness | Imprecision          | Publication bias | Overall certainty of evidence | Number of patients  |                       | Relative effect (95% CI) | Anticipated absolute effects |                                                     |
|                                                                                        |                      |               |              |                      |                  |                               | With Usual Care     | With TENS+ Usual Care |                          | Risk with Usual Care         | Risk difference with TENS+Usual Care                |
| <b>VAS pain at 4-8 weeks (0-100 scale) (lower scores indicate improvement)</b>         |                      |               |              |                      |                  |                               |                     |                       |                          |                              |                                                     |
| 146 (3 studies)                                                                        | serious <sup>a</sup> | not serious   | not serious  | not serious          | none             | ⊕⊕⊕○<br>MODERATE              | 73                  | 73                    | -                        | -                            | MD <b>2.08 lower</b><br>(7.72 lower to 3.56 higher) |
| <b>VAS pain at 6 months (0-100 scale) (lower scores indicate improvement)</b>          |                      |               |              |                      |                  |                               |                     |                       |                          |                              |                                                     |
| 74 (1 study)                                                                           | not serious          | not serious   | not serious  | serious <sup>b</sup> | none             | ⊕⊕⊕○<br>MODERATE              | 37                  | 37                    | -                        | -                            | MD <b>1.5 lower</b><br>(11.48 lower to 8.48 higher) |
| <b>WOMAC pain at 4 weeks (0-20, lower scores indicate improvement)</b>                 |                      |               |              |                      |                  |                               |                     |                       |                          |                              |                                                     |
| 98 (2 studies)                                                                         | serious <sup>a</sup> | not serious   | not serious  | not serious          | none             | ⊕⊕⊕○<br>MODERATE              | 49                  | 49                    | -                        | -                            | MD <b>0.94 lower</b><br>(2.08 lower to 0.19 higher) |
| <b>WOMAC Function at 4 weeks (0-68, lower scores indicate improvement)</b>             |                      |               |              |                      |                  |                               |                     |                       |                          |                              |                                                     |
| 98 (2 studies)                                                                         | serious <sup>a</sup> | not serious   | not serious  | not serious          | none             | ⊕⊕⊕○<br>MODERATE              | 49                  | 49                    | -                        | -                            | MD <b>1.35 lower</b><br>(4.28 lower to 1.59 higher) |
| <b>VAS pain right after treatment (0-10 scale) (lower scores indicate improvement)</b> |                      |               |              |                      |                  |                               |                     |                       |                          |                              |                                                     |

| <b>Table 1. TENS+Usual Care compared to Usual Care for Hip and Knee OA</b>  |                      |             |             |                      |      |              |                            |    |   |   |                                                     |
|-----------------------------------------------------------------------------|----------------------|-------------|-------------|----------------------|------|--------------|----------------------------|----|---|---|-----------------------------------------------------|
| <b>Certainty assessment</b>                                                 |                      |             |             |                      |      |              | <b>Summary of findings</b> |    |   |   |                                                     |
| 72<br>(2 studies)                                                           | serious <sup>a</sup> | not serious | not serious | serious <sup>b</sup> | none | ⊕⊕○○<br>LOW  | 37                         | 35 | - | - | MD <b>0.93 lower</b><br>(2.39 lower to 0.54 higher) |
| <b>WOMAC pain at 6 months (0-20, lower scores indicate improvement)</b>     |                      |             |             |                      |      |              |                            |    |   |   |                                                     |
| 74<br>(1 study)                                                             | not serious          | not serious | not serious | not serious          | none | ⊕⊕⊕⊕<br>HIGH | 37                         | 37 | - | - | MD <b>0.7 lower</b><br>(2.2 lower to 0.8 higher)    |
| <b>WOMAC function at 6 months (0-68, lower scores indicate improvement)</b> |                      |             |             |                      |      |              |                            |    |   |   |                                                     |
| 74<br>(1 study)                                                             | not serious          | not serious | not serious | not serious          | none | ⊕⊕⊕⊕<br>HIGH | 37                         | 37 | - | - | MD <b>0.4 lower</b><br>(5.31 lower to 4.51 higher)  |

**CI:** Confidence interval; **MD:** Mean difference

## Explanations

- a. Participants not blinded in some studies; unclear in some studies if outcome assessors were blinded
- b. Wide confidence interval that crosses line of no effect

**Table 2. RCT data not suitable for effect size calculation or combining with other data**

| Ref ID, Author, year    | Study type                                | Duration | Population Description        | Treatment given to relevant population | Results                                                                                                                                                                   |
|-------------------------|-------------------------------------------|----------|-------------------------------|----------------------------------------|---------------------------------------------------------------------------------------------------------------------------------------------------------------------------|
| 8046<br>Cherian<br>2015 | Prospective randomized single blind trial | 3 months | 25 pts with K+L grade 1 and 2 | TENS vs usual care                     | VAS pain was primary outcome, reported means and ranges but no SD<br>Change in VAS pain for TENS group (N=13) was -2.6 and for control group (N+=10) was -1.3 with p=0.18 |

| Ref ID, Author, year | Study type                                | Duration                                     | Population Description                                                                                                            | Treatment given to relevant population                                                                                | Results                                                                                                                                                                                                                                                                                                                                                                                                           |
|----------------------|-------------------------------------------|----------------------------------------------|-----------------------------------------------------------------------------------------------------------------------------------|-----------------------------------------------------------------------------------------------------------------------|-------------------------------------------------------------------------------------------------------------------------------------------------------------------------------------------------------------------------------------------------------------------------------------------------------------------------------------------------------------------------------------------------------------------|
| 5820 Law 2004        | Double blind RCT                          | 14 days                                      | 36 pts with grade II knee OA and pain                                                                                             | 1)2 Hz TENS, 2)100 Hz TENS, 3)alternating 2 and 100 Hz, and 4)placebo TENS 5 days a week for 2 weeks                  | The 3 active TENS groups had significantly reduced knee pain by VAS across treatment sessions but no significant between group differences were found.                                                                                                                                                                                                                                                            |
| 5819 Cheing 2003     | RCT                                       | 14 days                                      | 38 patients aged 50-80 years with K+L grade 2 or higher radiographic knee OA and pain on VAS. Mean age 65.5, 34 female and 4 male | 1) TENS 20 minutes, 2) TENS 40 min, 3)TENS 60 min, 4)placebo 5 days per week for 20 weeks                             | By day 10, a significantly greater cumulative reduction in VAS pain was found in the TENS 40 min (83.4%) and TENS 60 (68.37%) groups than the other 2 groups (p<0.003) and maintained at 2 week follow up. TENS group 40 min (256 min) and TENS group 60 min (258) min produced the more prolonged pain relief at day 10, but TENS 40 min group produced the longest pain relief period by the follow up session. |
| 1861 Cherian 2016    | Prospective randomized single blind trial | 1 year                                       | 70 pts with K+L grade 2-4                                                                                                         | TENS vs usual care<br><br>(1 year follow up of Refid 8046, Cherian 2015)                                              | VAS pain was primary outcome, reported means but no SD<br>Change in VAS pain for TENS group (N=33) was -0.4 and for control group (N+=37) was +0.62 but no p value reported.<br>Final pain VAS for TENS cohort was 4.55 and for control group was 5.1 with p=0.55                                                                                                                                                 |
| 283 Lone 2002        | Controlled single blind trial             | 3 phases of 2 weeks each with 1 week washout | 60 patients with clinical and x-ray knee OA for >6 months age 40-70 yrs and 40-70 kg weight                                       | Phase I placebo drug+placebo TENS<br>Phase II Diclofenac 50 mg TID+placebo TENS<br>Phase III placebo drug+active TENS | Pain assessed on 6 point descriptive scale 9Downie 1978)<br>P<0.5 favoring diclofenac over placebo, analysis of phases 2 and 3, 2 and 1 and 3 and 1 revealed significant pain relief (p<0.0001) and improved walking (p<0.0001) after TENS in the group with mild to moderate pain, but not effective in patients with severe pain                                                                                |

## References

1. Atamaz FC, Durmaz B, Baydar M, Demircioglu OY, Iliyapici A, Kuran B, et al. Comparison of the efficacy of transcutaneous electrical nerve stimulation, interferential currents, and shortwave diathermy in knee osteoarthritis: a double-blind, randomized, controlled, multicenter study. Arch Phys Med Rehabil. 2012;93:748-56.

2. Cetin N, Aytar A, Atalay A, Akman MN. Comparing hot pack, short-wave diathermy, ultrasound, and TENS on isokinetic strength, pain, and functional status of women with osteoarthritic knees: a single-blind, randomized, controlled trial. *Am J Phys Med Rehabil.* 2008;87:443-51.
3. Cheing GL, Hui-Chan CW, Chan KM. Does four weeks of TENS and/or isometric exercise produce cumulative reduction of osteoarthritic knee pain? *Clin Rehabil.* 2002;16:749-60.
4. Pietrosimone BG, Saliba SA, Hart JM, Hertel J, Kerrigan DC, Ingersoll CD. Effects of transcutaneous electrical nerve stimulation and therapeutic exercise on quadriceps activation in people with tibiofemoral osteoarthritis. *J Orthop Sports Phys Ther.* 2011;41:4-12.
5. Pietrosimone BG, Hart JM, Saliba SA, Hertel J, Ingersoll CD. Immediate effects of transcutaneous electrical nerve stimulation and focal knee joint cooling on quadriceps activation. *Med Sci Sports Exerc.* 2009;41:1175-81.
6. Vance CG, Rakel BA, Blodgett NP, DeSantana JM, Amendola A, Zimmerman MB, et al. Effects of transcutaneous electrical nerve stimulation on pain, pain sensitivity, and function in people with knee osteoarthritis: a randomized controlled trial. *Phys Ther.* 2012;92:898-910.
7. Lewis D, Lewis B, Sturrock RD. Transcutaneous electrical nerve stimulation in osteoarthrosis: a therapeutic alternative? *Ann Rheum Dis.* 1984;43:47-9.
8. Law PP, Cheing GL. Optimal stimulation frequency of transcutaneous electrical nerve stimulation on people with knee osteoarthritis. *J Rehabil Med.* 2004;36:220-5.
9. Lone AR, Wafai ZA, Buth BA, Wani TA, Koul PA, Khan SH. Analgesic Efficacy of Transcutaneous Electrical Nerve Stimulation Compared with Diclofenac Sodium in Osteo-arthritis of the Knee. *Physiotherapy.* 2003;89:478-85.
10. Cheing GL, Tsui AY, Lo SK, Hui-Chan CW. Optimal stimulation duration of tens in the management of osteoarthritic knee pain. *J Rehabil Med.* 2003;35:62-8.
11. Cherian JJ, Harrison PE, Benjamin SA, Bhawe A, Harwin SF, Mont MA. Do the Effects of Transcutaneous Electrical Nerve Stimulation on Knee Osteoarthritis Pain and Function Last? *J Knee Surg.* 2016;29:497-501.
12. Cherian JJ, Kapadia BH, Bhawe A, McElroy MJ, Cherian C, Harwin SF, et al. Use of Transcutaneous Electrical Nerve Stimulation Device in Early Osteoarthritis of the Knee. *J Knee Surg.* 2015;28:321-7.

**PICO 33: Pulsed vibration therapy (+ usual care) compared to usual care for knee OA**

Summary: One RCT<sup>1</sup> compared muscle vibration therapy to sham vibration therapy for adults with knee OA. Rabini et al.<sup>1</sup> evaluated three applications per day (total 30 minutes per day) for 3 consecutive days applied bilaterally to the distal quadriceps muscle. The treatment group reported greater improvement in the WOMAC composite score from baseline to 24-week follow up. The pain and function subscales of the WOMAC were not reported independently.

Quality of evidence: Low

| Focal muscle vibration compared to Sham for Knee OA                                                      |                      |               |              |                      |                  |                               |                     |                             |                          |                              |                                                                                         |
|----------------------------------------------------------------------------------------------------------|----------------------|---------------|--------------|----------------------|------------------|-------------------------------|---------------------|-----------------------------|--------------------------|------------------------------|-----------------------------------------------------------------------------------------|
| Certainty assessment                                                                                     |                      |               |              |                      |                  |                               | Summary of findings |                             |                          |                              |                                                                                         |
| Nº of participants (studies) Follow-up                                                                   | Risk of bias         | Inconsistency | Indirectness | Imprecision          | Publication bias | Overall certainty of evidence | Number of subjects  |                             | Relative effect (95% CI) | Anticipated absolute effects |                                                                                         |
|                                                                                                          |                      |               |              |                      |                  |                               | With Sham           | With Focal muscle vibration |                          | Risk with Sham               | Risk difference with Focal muscle vibration                                             |
| <b>Pain and Self-reported Function (0-96, WOMAC composite score) (lower scores indicate improvement)</b> |                      |               |              |                      |                  |                               |                     |                             |                          |                              |                                                                                         |
| 50 (1 RCT)                                                                                               | serious <sup>a</sup> | not serious   | not serious  | serious <sup>b</sup> | none             | ⊕⊕○○<br>LOW                   | 25                  | 25                          | -                        | -                            | MD <b>27.2 lower</b> (32.71 lower to 21.69 lower)<br><br><b>Favors pulsed vibration</b> |

CI: Confidence interval; MD: Mean difference

## Explanations

- a. Physical therapists who delivered treatment not blinded; patients and outcome assessor were blind
- b. Single small study with large effect

## References

1. Rabini A, De Sire A, Marzetti E, et al. Effects of focal muscle vibration on physical functioning in patients with knee osteoarthritis: a randomized controlled trial. *Eur J Phys Rehabil Med.* 2015;51(5):513-520.

**PICO 34: Massage therapy+ usual care compared to usual care for knee OA**

Summary. Six RCTs addressed this comparison. The studies differed in the methods of massage therapy, with 2 studies with aromatherapy oils, 1 study with Thai massage, another study with self-massage and 2 studies by the same authors looking at massage therapy with PT. Two studies used aromatherapy oils with their massage. In one study(1), massage with orange and ginger oil (active aromatherapy) was compared to olive oil (aromatherapy control) massage and to control of usual care, without significant difference from control for massage with either oil with Pain VAS. Another study(2) used aromatherapy with lavender oil, without significant benefit. Thai massage was studied (3) and compared to an herbal compress and usual care, but the 2 interventions groups were not allowed usual care, which differs from the PICO comparison. A study of self-massage (4) did not show benefit for WOMAC pain. The 2 studies by the same group (5, 6) did show benefit for WOMAC pain at 8 weeks, however the primary goal of Perlman 2012 (5) was to identify optimal dosage of massage. Overall, only the 2 studies performed by the same authors (5, 6) showed any benefit of massage. The addition of aromatherapy did not show improvement in pain by VAS and WOMAC in knee OA. There was variability in the massage techniques and regimen making generalization of findings difficult. A literature search update in August 2018 identified one additional relevant RCT (7), but it did not alter the findings observed in the tables below.

Quality of evidence across all critical outcomes: Low

| <b>Table 1. Massage compared to usual care for Knee OA</b>                           |                      |                      |                     |                      |                         |                                      |                            |                     |                                 |                                     |                                                      |
|--------------------------------------------------------------------------------------|----------------------|----------------------|---------------------|----------------------|-------------------------|--------------------------------------|----------------------------|---------------------|---------------------------------|-------------------------------------|------------------------------------------------------|
| <b>Certainty assessment</b>                                                          |                      |                      |                     |                      |                         |                                      | <b>Summary of findings</b> |                     |                                 |                                     |                                                      |
| <b>Nº of participants (studies) Follow-up</b>                                        | <b>Risk of bias</b>  | <b>Inconsistency</b> | <b>Indirectness</b> | <b>Imprecision</b>   | <b>Publication bias</b> | <b>Overall certainty of evidence</b> | <b>Number of patients</b>  |                     | <b>Relative effect (95% CI)</b> | <b>Anticipated absolute effects</b> |                                                      |
|                                                                                      |                      |                      |                     |                      |                         |                                      | <b>With usual care</b>     | <b>With Massage</b> |                                 | <b>Risk with usual care</b>         | <b>Risk difference with Massage</b>                  |
| <b>VAS Pain during walking at 3 weeks (0-100, lower scores indicate improvement)</b> |                      |                      |                     |                      |                         |                                      |                            |                     |                                 |                                     |                                                      |
| 40 (1 study)                                                                         | serious <sup>a</sup> | not serious          | not serious         | serious <sup>b</sup> | none                    | ⊕⊕○○<br>LOW                          | 20                         | 20                  | -                               | -                                   | <b>MD 2.15 lower</b><br>(12.41 lower to 8.11 higher) |

**Table 1. Massage compared to usual care for Knee OA**

| <b>Table 1. Massage compared to usual care for Knee OA</b>                       |                      |             |             |                      |      |                            |    |    |   |   |                                                                                    |
|----------------------------------------------------------------------------------|----------------------|-------------|-------------|----------------------|------|----------------------------|----|----|---|---|------------------------------------------------------------------------------------|
| <b>Certainty assessment</b>                                                      |                      |             |             |                      |      | <b>Summary of findings</b> |    |    |   |   |                                                                                    |
| <b>VAS pain 1 week post massage (0-10, lower scores indicate improvement)</b>    |                      |             |             |                      |      |                            |    |    |   |   |                                                                                    |
| 53<br>(1 study)                                                                  | serious <sup>a</sup> | not serious | not serious | serious <sup>b</sup> | none | ⊕⊕○○<br>LOW                | 26 | 27 | - | - | MD <b>0.34 lower</b><br>(1.02 lower to 0.34 higher)                                |
| <b>VAS pain 4 weeks post massage (0-10, lower scores indicate improvement)</b>   |                      |             |             |                      |      |                            |    |    |   |   |                                                                                    |
| 53<br>(1 study)                                                                  | serious <sup>a</sup> | not serious | not serious | serious <sup>b</sup> | none | ⊕⊕○○<br>LOW                | 26 | 27 | - | - | MD <b>0.07 higher</b><br>(0.61 lower to 0.75 higher)                               |
| <b>WOMAC pain 4 weeks post massage (0-20, lower scores indicate improvement)</b> |                      |             |             |                      |      |                            |    |    |   |   |                                                                                    |
| 34<br>(1 study)                                                                  | not serious          | not serious | not serious | serious <sup>b</sup> | none | ⊕⊕⊕○<br>MODERATE           | 17 | 17 | - | - | MD <b>0.94 lower</b><br>(2.82 lower to 0.94 higher)                                |
| <b>WOMAC pain at 8 weeks (0-100, lower scores indicate improvement)</b>          |                      |             |             |                      |      |                            |    |    |   |   |                                                                                    |
| 117<br>(2 studies)                                                               | serious <sup>c</sup> | not serious | not serious | serious <sup>d</sup> | none | ⊕⊕○○<br>LOW                | 58 | 59 | - | - | MD <b>21.74 lower</b><br>(26.05 lower to 17.43 lower)<br><br><b>Favors massage</b> |
| <b>WOMAC pain at 12 weeks (0-20, lower scores indicate improvement)</b>          |                      |             |             |                      |      |                            |    |    |   |   |                                                                                    |



**Table 1. Massage compared to usual care for Knee OA**

| Certainty assessment                                                                   |                      |             |             |                      |      |             | Summary of findings |    |   |   |                                                     |
|----------------------------------------------------------------------------------------|----------------------|-------------|-------------|----------------------|------|-------------|---------------------|----|---|---|-----------------------------------------------------|
| 36<br>(1 study)                                                                        | serious <sup>a</sup> | not serious | not serious | serious <sup>b</sup> | none | ⊕⊕○○<br>LOW | 18                  | 18 | - | - | MD <b>0.61 lower</b><br>(1.85 lower to 0.62 higher) |
| <b>Time to climbing ten steps (sec) at 3 weeks (lower scores indicate improvement)</b> |                      |             |             |                      |      |             |                     |    |   |   |                                                     |
| 40<br>(1 study)                                                                        | serious <sup>a</sup> | not serious | not serious | serious <sup>b</sup> | none | ⊕⊕○○<br>LOW | 20                  | 20 | - | - | MD <b>1 lower</b><br>(3.08 lower to 1.08 higher)    |

CI: Confidence interval; MD: Mean difference

### Explanations

- a. Patients not blinded in most trials; most have blinded outcome assessors
- b. Wide CI that crosses line of no effect
- c. Patients and personnel not blinded
- d. Two small studies by same research group with large effect

**Table 2. Massage with aromatherapy oils compared to usual care for Knee OA**

| Certainty assessment |  |               |              |             |                  | Summary of findings |                    |                 |                              |
|----------------------|--|---------------|--------------|-------------|------------------|---------------------|--------------------|-----------------|------------------------------|
| Nº of participants   |  | Inconsistency | Indirectness | Imprecision | Publication bias | Overall certainty   | Number of patients | Relative effect | Anticipated absolute effects |

**Table 2. Massage with aromatherapy oils compared to usual care for Knee OA**

| <b>Table 2. Massage with aromatherapy oils compared to usual care for Knee OA</b> |                             |             |             |                      |      |                        |                                |                                                        |                     |                                         |                                                                                            |
|-----------------------------------------------------------------------------------|-----------------------------|-------------|-------------|----------------------|------|------------------------|--------------------------------|--------------------------------------------------------|---------------------|-----------------------------------------|--------------------------------------------------------------------------------------------|
| <b>Certainty assessment</b>                                                       |                             |             |             |                      |      |                        | <b>Summary of findings</b>     |                                                        |                     |                                         |                                                                                            |
| <b>(studies)<br/>Follow-up</b>                                                    | <b>Risk<br/>of<br/>bias</b> |             |             |                      |      | <b>of<br/>evidence</b> | <b>With<br/>usual<br/>care</b> | <b>With Massage<br/>with<br/>aromatherapy<br/>oils</b> | <b>(95%<br/>CI)</b> | <b>Risk<br/>with<br/>usual<br/>care</b> | <b>Risk<br/>difference<br/>with Massage<br/>with<br/>aromatherapy<br/>oils</b>             |
| <b>VAS pain 1 week post massage (0-10, lower scores indicate improvement)</b>     |                             |             |             |                      |      |                        |                                |                                                        |                     |                                         |                                                                                            |
| 53<br>(1 study)                                                                   | serious <sup>a</sup>        | not serious | not serious | not serious          | none | ⊕⊕⊕○<br>MODERATE       | 26                             | 27                                                     | -                   | -                                       | MD <b>1.01<br/>lower</b><br>(1.59 lower to<br>0.43 lower)<br><br><b>Favors<br/>massage</b> |
| <b>VAS pain 4 weeks post massage (0-10, lower scores indicate improvement)</b>    |                             |             |             |                      |      |                        |                                |                                                        |                     |                                         |                                                                                            |
| 53<br>(1 study)                                                                   | serious <sup>a</sup>        | not serious | not serious | not serious          | none | ⊕⊕⊕○<br>MODERATE       | 26                             | 27                                                     | -                   | -                                       | MD <b>0.29<br/>higher</b><br>(0.35 lower to<br>0.93 higher)                                |
| <b>WOMAC pain 4 weeks post massage (0-20, lower scores indicate improvement)</b>  |                             |             |             |                      |      |                        |                                |                                                        |                     |                                         |                                                                                            |
| 36<br>(1 study)                                                                   | serious <sup>a</sup>        | not serious | not serious | serious <sup>b</sup> | none | ⊕⊕○○<br>LOW            | 17                             | 19                                                     | -                   | -                                       | MD <b>1.08<br/>lower</b><br>(2.98 lower to<br>0.82 higher)                                 |

**CI:** Confidence interval; **MD:** Mean difference

### Explanations

- a. Patients not blinded to massage vs usual care; outcome assessor was blinded
- b. Small study with CI that crosses line of no effect

## References

1. Yip YB, Tam AC. An experimental study on the effectiveness of massage with aromatic ginger and orange essential oil for moderate-to-severe knee pain among the elderly in Hong Kong. *Complement Ther Med*. 2008;16:131-8.
2. Nasiri A, Mahmodi MA, Nobakht Z. Effect of aromatherapy massage with lavender essential oil on pain in patients with osteoarthritis of the knee: A randomized controlled clinical trial. *Complement Ther Clin Pract*. 2016;25:75-80.
3. Chiranthanut N, Hanprasertpong N, Teekachunhatean S. Thai massage, and Thai herbal compress versus oral ibuprofen in symptomatic treatment of osteoarthritis of the knee: a randomized controlled trial. *Biomed Res Int*. 2014;2014:490512.
4. Atkins DV, Eichler DA. The effects of self-massage on osteoarthritis of the knee: a randomized, controlled trial. *Int J Ther Massage Bodywork*. 2013;6:4-14.
5. Perlman AI, Ali A, Njike VY, Hom D, Davidi A, Gould-Fogerite S, et al. Massage therapy for osteoarthritis of the knee: a randomized dose-finding trial. *PLoS One*. 2012;7:e30248.
6. Perlman AI, Sabina A, Williams AL, Njike VY, Katz DL. Massage therapy for osteoarthritis of the knee: a randomized controlled trial. *Arch Intern Med*. 2006;166:2533-8.
7. Tanaka R, Umehara T, Kawabata Y, Sakuda T. Effect of Continuous Compression Stimulation on Pressure-Pain Threshold and Muscle Spasms in Older Adults With Knee Osteoarthritis: A Randomized Trial. *J Manipulative Physiol Ther*. 2018 May;41(4):315-322.

### **PICO 35: Manual Therapy plus Exercise plus Usual Care compared to Usual Care for Knee and Hip OA**

Summary. Five RCTs addressed this comparison. Two studies<sup>(1, 2)</sup> evaluated the utility of manual therapy plus exercise vs usual care in hip OA, while the other 3 studies examined the effect in knee OA.<sup>(3-5)</sup> A study of hip OA<sup>(1)</sup> differed from the other studies as the control group didn't get usual care alone, but received sham PT and inert gel ultrasound. In the other hip study<sup>(2)</sup>, manual therapy was given weekly for 8 weeks. In a knee OA study<sup>(5)</sup>, manual therapy was used for knee OA without an exercise component in a small group of patients, with a treatment given 3 times per week over 2 weeks. In another small study<sup>(4)</sup>, 30 knee OA patients received either osteopathic manual therapy without exercise vs osteopathic usual care, and they received only one treatment, with primary outcome measures of Doppler flow. The intervention and outcomes generally did not fit the PICO outline. Deyle et al<sup>(3)</sup> used sub-therapeutic ultrasound and PT for the control group.

For hip OA, manual therapy did not appear to provide significant improvement in function, but in one study<sup>(2)</sup>, may have helped with pain during activity, although the 2 studies were different as noted above. For knee OA, manual therapy provided a small improvement in pain, and in one study showed significant improvement in 6 minute walk distance compared to usual care.<sup>(3)</sup>

A literature search update in August 2018 identified two additional relevant RCTs.<sup>[6,7]</sup> They did not alter the findings observed in the tables below.

Quality of evidence across all critical outcomes: Low

| <b>Manual Therapy+Exercise+Usual Care compared to Usual Care for Hip or Knee OA</b>    |                     |                      |                      |                      |                         |                                      |                              |                                                  |                                 |                                     |                                                                                                   |
|----------------------------------------------------------------------------------------|---------------------|----------------------|----------------------|----------------------|-------------------------|--------------------------------------|------------------------------|--------------------------------------------------|---------------------------------|-------------------------------------|---------------------------------------------------------------------------------------------------|
| <b>Certainty assessment</b>                                                            |                     |                      |                      |                      |                         |                                      | <b>Summary of findings</b>   |                                                  |                                 |                                     |                                                                                                   |
| <b>Nº of participants (studies) Follow-up</b>                                          | <b>Risk of bias</b> | <b>Inconsistency</b> | <b>Indirectness</b>  | <b>Imprecision</b>   | <b>Publication bias</b> | <b>Overall certainty of evidence</b> | <b>Study event rates (%)</b> |                                                  | <b>Relative effect (95% CI)</b> | <b>Anticipated absolute effects</b> |                                                                                                   |
|                                                                                        |                     |                      |                      |                      |                         |                                      | <b>With Usual Care</b>       | <b>With Manual Therapy+ Exercise+ Usual Care</b> |                                 | <b>Risk with Usual Care</b>         | <b>Risk difference with Manual Therapy+ Exercise+ Usual Care</b>                                  |
| <b>Hip pain VAS at 13 weeks (0-100, lower scores indicate improvement)</b>             |                     |                      |                      |                      |                         |                                      |                              |                                                  |                                 |                                     |                                                                                                   |
| 96 (1 study)                                                                           | not serious         | not serious          | serious <sup>a</sup> | serious <sup>e</sup> | none                    | ⊕⊕○○<br>LOW                          | 50                           | 46                                               | -                               | -                                   | MD <b>4.9 higher</b><br>(4.36 lower to 14.16 higher)                                              |
| <b>Hip pain VAS during activity at 9 wks (0-10, lower scores indicate improvement)</b> |                     |                      |                      |                      |                         |                                      |                              |                                                  |                                 |                                     |                                                                                                   |
| 86 (1 study)                                                                           | not serious         | not serious          | not serious          | not serious          | none                    | ⊕⊕⊕⊕<br>HIGH                         | 43                           | 43                                               | -                               | -                                   | MD <b>1.42 lower</b><br>(2.75 lower to 0.09 lower)<br><br><b>Favors manual therapy + exercise</b> |
| <b>Knee pain VAS at 2 weeks (0-10, lower scores indicate improvement)</b>              |                     |                      |                      |                      |                         |                                      |                              |                                                  |                                 |                                     |                                                                                                   |

## Manual Therapy+Exercise+Usual Care compared to Usual Care for Hip or Knee OA

| Certainty assessment                                                                |                      |             |                      |             |      |                  | Summary of findings |    |   |   |                                                                                                    |
|-------------------------------------------------------------------------------------|----------------------|-------------|----------------------|-------------|------|------------------|---------------------|----|---|---|----------------------------------------------------------------------------------------------------|
| 43<br>(1 study)                                                                     | serious <sup>f</sup> | not serious | serious <sup>b</sup> | not serious | none | ⊕⊕○○<br>LOW      | 17                  | 26 | - | - | MD <b>1.2 lower</b><br>(2.34 lower to 0.06 lower)<br><br><b>Favors manual therapy + exercise</b>   |
| <b>Knee pain VAS right after manual therapy (lower scores indicate improvement)</b> |                      |             |                      |             |      |                  |                     |    |   |   |                                                                                                    |
| 30<br>(1 study)                                                                     | not serious          | not serious | serious <sup>c</sup> | not serious | none | ⊕⊕⊕○<br>MODERATE | 15                  | 15 | - | - | MD <b>0.1 lower</b><br>(1.21 lower to 1.01 higher)                                                 |
| <b>WOMAC PF hip OA 9 wks (0-68, lower scores indicate improvement)</b>              |                      |             |                      |             |      |                  |                     |    |   |   |                                                                                                    |
| 86<br>(1 study)                                                                     | not serious          | not serious | not serious          | not serious | none | ⊕⊕⊕⊕<br>HIGH     | 43                  | 43 | - | - | MD <b>6.78 lower</b><br>(13.86 lower to 0.3 higher)                                                |
| <b>WOMAC PF hip OA at 13 wks (0-68, lower scores indicate improvement)</b>          |                      |             |                      |             |      |                  |                     |    |   |   |                                                                                                    |
| 96<br>(1 study)                                                                     | not serious          | not serious | serious <sup>a</sup> | not serious | none | ⊕⊕⊕○<br>MODERATE | 50                  | 46 | - | - | MD <b>1.1 higher</b><br>(3.77 lower to 5.97 higher)                                                |
| <b>6 min walk test knee OA at 8 wks (higher scores indicate improvement)</b>        |                      |             |                      |             |      |                  |                     |    |   |   |                                                                                                    |
| 69<br>(1 study)                                                                     | serious <sup>g</sup> | not serious | serious <sup>d</sup> | not serious | none | ⊕⊕○○<br>LOW      | 36                  | 33 | - | - | MD <b>77.7 higher</b><br>(58 higher to 97.4 higher)<br><br><b>Favors manual therapy + exercise</b> |

CI: Confidence interval; MD: Mean difference

## Explanations

- a. Control group had sham PT and ultrasound with inert gel which differs from other studies
- b. Differs from PICO 35 as no exercise involved, only manual therapy
- c. Patients received only one treatment, no exercise, and primary outcome measure was Doppler flow. The intervention and outcomes generally did not fit the PICO outline.
- d. Control group received subtherapeutic ultrasound with PT, no pain assessment
- e. Wide 95% CI that crosses line of no effect
- f. Unclear if outcome assessors were blinded. Personnel delivering treatment could not be blinded.
- g. >10% dropout, no ITT analysis

## References

1. Bennell KL, Egerton T, Martin J, Abbott JH, Metcalf B, McManus F, et al. Effect of physical therapy on pain and function in patients with hip osteoarthritis: a randomized clinical trial. *JAMA*. 2014;311:1987-97.
2. French HP, Cusack T, Brennan A, Caffrey A, Conroy R, Cuddy V, et al. Exercise and manual physiotherapy arthritis research trial (EMPART) for osteoarthritis of the hip: a multicenter randomized controlled trial. *Arch Phys Med Rehabil*. 2013;94:302-14.
3. Deyle GD, Allison SC, Matekel RL, Ryder MG, Stang JM, Gohdes DD, et al. Physical therapy treatment effectiveness for osteoarthritis of the knee: a randomized comparison of supervised clinical exercise and manual therapy procedures versus a home exercise program. *Phys Ther*. 2005;85:1301-17.
4. Jardine WM, Gillis C, Rutherford D. The effect of osteopathic manual therapy on the vascular supply to the lower extremity in individuals with knee osteoarthritis: A randomized trial. *International Journal of Osteopathic Medicine*. 2012;15:125-33.
5. Pollard H, Ward G, Hoskins W, Hardy K. The effect of a manual therapy knee protocol on osteoarthritic knee pain: a randomised controlled trial. *J Can Chiropr Assoc*. 2008;52:229-42.
6. Allen KD1, Arbeeve L2, Callahan LF3, Golightly YM4, Goode AP5, Heiderscheit BC6, et al. Physical therapy vs internet-based exercise training for patients with knee osteoarthritis: results of a randomized controlled trial. *Osteoarthritis Cartilage*. 2018 Mar;26(3):383-396.
7. Altınbilek T, Murat S, Yumuşakhuylu Y, İçağasıoğlu A. Osteopathic manipulative treatment improves function and relieves pain in knee osteoarthritis: A single-blind, randomized-controlled trial. *Turk J Phys Med Rehab* 2018;64(2):114-120.

**PICO 36. Weight Loss plus exercise compared to exercise alone for Knee OA**

Summary. Three RCTs addressed this comparison in patients with knee OA. Two studies did not have PICO outcomes as primary outcomes, with compressive force the main outcomes in one study<sup>(1)</sup> and mobility related self-efficacy in the other<sup>(2)</sup>. The third study<sup>(3)</sup> was very small with only 24 participants with high attrition and outcomes measured using a 6 point Likert scales, including for pain, which was not a PICO measure scale. In the Focht study<sup>(2)</sup>, applicable outcome measures were 6 minute walk distance and stair-climb time, while in the Messier 2013 study<sup>(1)</sup>, the applicable outcomes measures were WOMAC pain and 6 minute walk distance at 18 months. For 6-minute walk distance and stair climb time, weight loss plus exercise intervention were superior to exercise alone. WOMAC Pain showed a significant small between-group difference at 18 months favored weight loss plus exercise over exercise; however, pain on a 6 point Likert scale at 24 weeks showed no significant between-group difference with serious imprecision due to small sample size. 6-minute walk distance and stair climb time generally favored exercise plus diet vs exercise alone, although the difference was not significant at all time points.

Quality of evidence across all critical outcomes: Moderate

| <b>Weight Loss plus exercise compared to exercise alone for Knee OA</b>  |                      |                      |                     |                    |                         |                                      |                            |                                  |                                 |                                     |                                                                                 |
|--------------------------------------------------------------------------|----------------------|----------------------|---------------------|--------------------|-------------------------|--------------------------------------|----------------------------|----------------------------------|---------------------------------|-------------------------------------|---------------------------------------------------------------------------------|
| <b>Certainty assessment</b>                                              |                      |                      |                     |                    |                         |                                      | <b>Summary of findings</b> |                                  |                                 |                                     |                                                                                 |
| <b>Nº of participants (studies) Follow-up</b>                            | <b>Risk of bias</b>  | <b>Inconsistency</b> | <b>Indirectness</b> | <b>Imprecision</b> | <b>Publication bias</b> | <b>Overall certainty of evidence</b> | <b>Number of patients</b>  |                                  | <b>Relative effect (95% CI)</b> | <b>Anticipated absolute effects</b> |                                                                                 |
|                                                                          |                      |                      |                     |                    |                         |                                      | <b>With exercise alone</b> | <b>With Weight Loss+exercise</b> |                                 | <b>Risk with exercise alone</b>     | <b>Risk difference with Weight Loss+exercise</b>                                |
| <b>WOMAC Pain at 18 months (0-20, lower scores indicate improvement)</b> |                      |                      |                     |                    |                         |                                      |                            |                                  |                                 |                                     |                                                                                 |
| 302 (1 RCT)                                                              | serious <sup>a</sup> | not serious          | not serious         | not serious        | none                    | ⊕⊕⊕○<br>MODERATE                     | 150                        | 152                              | -                               | -                                   | MD <b>1.1 lower</b> (1.74 lower to 0.46 lower)<br><br><b>Favors weight loss</b> |

## Weight Loss plus exercise compared to exercise alone for Knee OA

| Certainty assessment                                                            |                      |             |             |                      |      | Summary of findings |     |     |   |   |                                                                                       |
|---------------------------------------------------------------------------------|----------------------|-------------|-------------|----------------------|------|---------------------|-----|-----|---|---|---------------------------------------------------------------------------------------|
| <b>Pain (Likert) at 24 weeks (1-5, lower scores indicate improvement)</b>       |                      |             |             |                      |      |                     |     |     |   |   |                                                                                       |
| 24<br>(1 RCT)                                                                   | serious <sup>a</sup> | not serious | not serious | serious <sup>b</sup> | none | ⊕⊕○○<br>LOW         | 11  | 13  | - | - | MD <b>0.64 higher</b><br>(0.43 lower to 1.71 higher)                                  |
| <b>6 minute walk distance at 24 weeks (higher scores indicate improvement)</b>  |                      |             |             |                      |      |                     |     |     |   |   |                                                                                       |
| 24<br>(1 RCT)                                                                   | serious <sup>a</sup> | not serious | not serious | serious <sup>b</sup> | none | ⊕⊕○○<br>LOW         | 11  | 13  | - | - | MD <b>103 higher</b><br>(3.94 lower to 209.94 higher)                                 |
| <b>6 minute walk distance at 18 months (higher scores indicate improvement)</b> |                      |             |             |                      |      |                     |     |     |   |   |                                                                                       |
| 458<br>(2 RCTs)                                                                 | serious <sup>a</sup> | not serious | not serious | not serious          | none | ⊕⊕⊕○<br>MODERATE    | 230 | 228 | - | - | MD <b>20 higher</b><br>(6.12 higher to 33.89 higher)<br><br><b>Favors weight loss</b> |
| <b>Stair-climb time at 24 weeks (lower scores indicate improvement)</b>         |                      |             |             |                      |      |                     |     |     |   |   |                                                                                       |
| 24<br>(1 RCT)                                                                   | serious <sup>a</sup> | not serious | not serious | serious <sup>c</sup> | none | ⊕⊕○○<br>LOW         | 11  | 13  | - | - | MD <b>1.28 lower</b><br>(2.22 lower to 0.34 lower)<br><br><b>Favors weight loss</b>   |



| Weight Loss plus exercise compared to exercise alone for Knee OA  |                      |             |             |             |      |                     |    |    |   |   |                                                    |
|-------------------------------------------------------------------|----------------------|-------------|-------------|-------------|------|---------------------|----|----|---|---|----------------------------------------------------|
| Certainty assessment                                              |                      |             |             |             |      | Summary of findings |    |    |   |   |                                                    |
| Stair-climb time at 18 months (lower scores indicate improvement) |                      |             |             |             |      |                     |    |    |   |   |                                                    |
| 156<br>(1 RCT)                                                    | serious <sup>a</sup> | not serious | not serious | not serious | none | ⊕⊕⊕○<br>MODERATE    | 80 | 76 | - | - | MD <b>0.3 lower</b><br>(1.88 lower to 1.28 higher) |

CI: Confidence interval; MD: Mean difference

## Explanations

- a. Patients not blinded; blinding of outcome assessors not reported
- b. Small sample size and wide CI that crosses line of no effect
- c. Small sample size

## References

1. Messier SP, Mihalko SL, Legault C, Miller GD, Nicklas BJ, DeVita P, et al. Effects of intensive diet and exercise on knee joint loads, inflammation, and clinical outcomes among overweight and obese adults with knee osteoarthritis: the IDEA randomized clinical trial. *JAMA*. 2013;310:1263-73.
2. Focht BC, Rejeski WJ, Ambrosius WT, Katula JA, Messier SP. Exercise, self-efficacy, and mobility performance in overweight and obese older adults with knee osteoarthritis. *Arthritis Rheum*. 2005;53:659-65.
3. Messier SP, Loeser RF, Mitchell MN, Valle G, Morgan TP, Rejeski WJ, et al. Exercise and weight loss in obese older adults with knee osteoarthritis: a preliminary study. *J Am Geriatr Soc*. 2000;48:1062-72.

PICO 37. Self-efficacy plus exercise compared to exercise alone for patients with hip or knee OA

Summary. The literature searches did not identify any studies that addressed this comparison.

Quality of evidence across all critical outcomes: Very low

**PICO 38: Manual Therapy plus Exercise compared to Exercise for Knee and Hip OA**

Summary: The literature searches identified 5 RCTs that addressed this comparison. Three studies(1-3) compared exercise plus manual therapy vs exercise in adults with knee OA; however, the primary purpose of one of the studies(3) was to assess design integrity and sample size estimation for a confirmatory study. One study was a randomized trial for hip OA patients(4) however, in this study, the comparison groups were manual therapy alone vs exercise and the primary outcome was “general perceived improvement” on a 6 point Likert scale. Another study included patients with hip and/or knee OA(5). Outcome measures were diverse, with pain scores as outcomes in only 2 studies(1, 3), but in those 2 studies, there was decreased pain with the addition of manual therapy to exercise seen at 5 weeks(3) and at 1 year(1). The findings were imprecise for WOMAC scores due to wide CIs around the effect estimates. Most outcomes were evaluated in a single study with low sample size and wide confidence intervals. Although the overall trend appeared to favor the addition of manual therapy, most findings were inconclusive due to serious imprecision.

Quality of Evidence across all critical outcomes: Low

| <b>Manual Therapy plus Exercise compared to Exercise for Knee and Hip OA</b>  |                      |                       |                      |                      |                          |                                      |                              |                                      |                                 |                                     |                                                      |
|-------------------------------------------------------------------------------|----------------------|-----------------------|----------------------|----------------------|--------------------------|--------------------------------------|------------------------------|--------------------------------------|---------------------------------|-------------------------------------|------------------------------------------------------|
| <b>Certainty assessment</b>                                                   |                      |                       |                      |                      |                          |                                      | <b>Summary of findings</b>   |                                      |                                 |                                     |                                                      |
| <b>Nº of participant s (studies) Follow-up</b>                                | <b>Risk of bias</b>  | <b>Inconsistenc y</b> | <b>Indirectnes s</b> | <b>Imprecisio n</b>  | <b>Publicatio n bias</b> | <b>Overall certainty of evidence</b> | <b>Study event rates (%)</b> |                                      | <b>Relative effect (95% CI)</b> | <b>Anticipated absolute effects</b> |                                                      |
|                                                                               |                      |                       |                      |                      |                          |                                      | <b>With Exercis e</b>        | <b>With Manual Therapy+ Exercise</b> |                                 | <b>Risk with Exercise</b>           | <b>Risk difference with Manual Therapy+Exercis e</b> |
| <b>WOMAC Pain score at 5 weeks (0-500, lower scores indicate improvement)</b> |                      |                       |                      |                      |                          |                                      |                              |                                      |                                 |                                     |                                                      |
| 56 (1 RCT)                                                                    | serious <sup>a</sup> | not serious           | not serious          | serious <sup>b</sup> | none                     | ⊕⊕○○<br>LOW                          | 28                           | 28                                   | -                               | -                                   | MD <b>31.5 lower</b> (72.4 lower to 9.4 higher)      |

## Manual Therapy plus Exercise compared to Exercise for Knee and Hip OA

| Certainty assessment                                                                      |                      |                      |             |                      |      | Summary of findings |    |    |   |   |                                                          |
|-------------------------------------------------------------------------------------------|----------------------|----------------------|-------------|----------------------|------|---------------------|----|----|---|---|----------------------------------------------------------|
| <b>WOMAC Physical Function at 5 weeks (0-1700, lower scores indicate improvement)</b>     |                      |                      |             |                      |      |                     |    |    |   |   |                                                          |
| 56<br>(1 RCT)                                                                             | serious <sup>a</sup> | not serious          | not serious | not serious          | none | ⊕⊕⊕○<br>MODERATE    | 28 | 28 | - | - | MD <b>32.8 lower</b><br>(191.4 lower to 125.8 higher)    |
| <b>WOMAC Total score at 4-5 weeks (0-2400, lower scores indicate improvement)</b>         |                      |                      |             |                      |      |                     |    |    |   |   |                                                          |
| 176<br>(2 RCTs)                                                                           | serious <sup>a</sup> | not serious          | not serious | serious <sup>b</sup> | none | ⊕⊕○○<br>LOW         | 88 | 88 | - | - | MD <b>173.95 lower</b><br>(368.26 lower to 20.36 higher) |
| <b>WOMAC Total score difference at 1 year (0-2400, lower scores indicate improvement)</b> |                      |                      |             |                      |      |                     |    |    |   |   |                                                          |
| 139<br>(2 RCTs)                                                                           | serious <sup>a</sup> | serious <sup>c</sup> | not serious | not serious          | none | ⊕⊕○○<br>LOW         | 70 | 69 | - | - | MD <b>18.98 lower</b><br>(59.25 lower to 21.29 higher)   |
| <b>6 minute walk at 4 weeks (higher scores indicate improvement)</b>                      |                      |                      |             |                      |      |                     |    |    |   |   |                                                          |
| 120<br>(1 RCT)                                                                            | serious <sup>a</sup> | not serious          | not serious | serious <sup>b</sup> | none | ⊕⊕○○<br>LOW         | 60 | 60 | - | - | MD <b>28.7 higher</b><br>(12.54 lower to 69.94 higher)   |

**CI:** Confidence interval; **MD:** Mean difference

### Explanations

- a. Patients not blinded; outcome assessors blinded
- b. Wide 95% CI that overlaps line of no effect
- c. High inconsistency with I<sup>2</sup>=92%

d. Small sample size

**References**

1. Abbott JH, Chapple CM, Fitzgerald GK, Fritz JM, Childs JD, Harcombe H, et al. The Incremental Effects of Manual Therapy or Booster Sessions in Addition to Exercise Therapy for Knee Osteoarthritis: A Randomized Clinical Trial. *J Orthop Sports Phys Ther.* 2015;45:975-83.
2. Deyle GD, Allison SC, Matekel RL, Ryder MG, Stang JM, Gohdes DD, et al. Physical therapy treatment effectiveness for osteoarthritis of the knee: a randomized comparison of supervised clinical exercise and manual therapy procedures versus a home exercise program. *Phys Ther.* 2005;85:1301-17.
3. Dwyer L, Parkin-Smith GF, Brantingham JW, Korporaal C, Cassa TK, Globe G, et al. Manual and manipulative therapy in addition to rehabilitation for osteoarthritis of the knee: assessor-blind randomized pilot trial. *J Manipulative Physiol Ther.* 2015;38:1-21 e2.
4. Hoeksma HL, Dekker J, Ronday HK, Heering A, van der Lubbe N, Vel C, et al. Comparison of manual therapy and exercise therapy in osteoarthritis of the hip: a randomized clinical trial. *Arthritis Rheum.* 2004;51:722-9.
5. Abbott JH, Robertson MC, Chapple C, Pinto D, Wright AA, Leon de la Barra S, et al. Manual therapy, exercise therapy, or both, in addition to usual care, for osteoarthritis of the hip or knee: a randomized controlled trial. 1: clinical effectiveness. *Osteoarthritis Cartilage.* 2013;21:525-34.

**PICO 39: Intra-articular corticosteroids compared to oral NSAIDS for knee or hip OA**

Summary: One study<sup>(1)</sup> compared intra-articular corticosteroids with oral NSAIDS. The comparison included 2 different NSAIDS and 2 different corticosteroids, but one of the NSAIDS (aceclofenac) and one of the IA drugs (Cortivazol) are not available in US and were not on the list of drugs to be evaluated. Data charted represents data comparing Diclofenac 150 mg BID to betamethasone 2 mg intra-articularly x 3. This was a low quality study as the patients were randomized alternately with poor allocation concealment and assessors did not appear to be blinded. While 83 patients were treated, 13 were excluded, and the reported data was only on 70 patients, and not an ITT analysis. Both groups had decrease in pain levels and there was no significant difference between groups. The finding was imprecise as the confidence interval was wide.

Quality of evidence across critical outcome: Low

| <b>IA steroid compared to NSAIDs for Knee OA</b> |  |                      |                     |                    |                         |                          |                            |                        |                                     |
|--------------------------------------------------|--|----------------------|---------------------|--------------------|-------------------------|--------------------------|----------------------------|------------------------|-------------------------------------|
| <b>Certainty assessment</b>                      |  |                      |                     |                    |                         |                          | <b>Summary of findings</b> |                        |                                     |
| <b>Nº of participants</b>                        |  | <b>Inconsistency</b> | <b>Indirectness</b> | <b>Imprecision</b> | <b>Publication bias</b> | <b>Overall certainty</b> | <b>Number of patients</b>  | <b>Relative effect</b> | <b>Anticipated absolute effects</b> |
|                                                  |  |                      |                     |                    |                         |                          |                            |                        |                                     |

| IA steroid compared to NSAIDs for Knee OA                          |                      |             |             |                      |      |                |                     |                       |             |                     |                                                             |
|--------------------------------------------------------------------|----------------------|-------------|-------------|----------------------|------|----------------|---------------------|-----------------------|-------------|---------------------|-------------------------------------------------------------|
| Certainty assessment                                               |                      |             |             |                      |      |                | Summary of findings |                       |             |                     |                                                             |
| (studies)<br>Follow-up                                             | Risk<br>of<br>bias   |             |             |                      |      | of<br>evidence | With<br>NSAIDs      | With<br>IA<br>steroid | (95%<br>CI) | Risk with<br>NSAIDs | Risk<br>difference<br>with IA<br>steroid                    |
| <b>VAS pain walking (0-100, lower scores indicate improvement)</b> |                      |             |             |                      |      |                |                     |                       |             |                     |                                                             |
| 70<br>(1 RCT)                                                      | serious <sup>a</sup> | not serious | not serious | serious <sup>b</sup> | none | ⊕⊕○○<br>LOW    | 35                  | 35                    | -           | -                   | MD <b>2.38 lower</b><br>(14.97 lower<br>to 10.21<br>higher) |

**CI:** Confidence interval; **MD:** Mean difference

## Explanations

- a. Poor allocation concealment and patients not blinded to therapy. Patients randomized alternately and not by a specific method. No ITT analysis.
- b. Wide 95% CI that crosses the line of no effect

## References

1. Dieu-Donne O, Theodore O, Joelle ZT, Pierre D, Smaila O, Christian C, et al. An Open Randomized Trial Comparing the Effects of Oral NSAIDs Versus Steroid Intra-Articular Infiltration in Congestive Osteoarthritis of the Knee. *Open Rheumatol J.* 2016;10:8-12.

## PICO 40. Long-acting intra-articular corticosteroids compared to oral NSAIDs for patients with knee or hip OA

Summary. The literature searches did not identify any studies that addressed this comparison.

Quality of evidence across all critical outcomes: Very low

**PICO 41: Intra-articular hyaluronic acid compared to oral NSAIDs for knee or hip OA**

Summary (hip): The literature search identified three RCTs<sup>[1-3]</sup> that indirectly addressed this PICO question for patients with hip OA (Table 1). The RCTs provided indirect evidence by comparing a single intra-articular hyaluronic acid injection to an intra-articular saline control. Participants who received an intra-articular hyaluronic acid injection versus saline had slightly lower mean differences in WOMAC pain and function scores, but the difference was not statistically significant. Studies by Atachia et al.<sup>[3]</sup> and Qvistgaard et al.<sup>[2]</sup>, not included in RevMan (Table 3), corroborated these results. There was a trend for increased adverse events for those receiving hyaluronic acid, but this finding was inconclusive due to too few events.

Summary (knee): The literature search identified 35 randomized control trials<sup>[1,4-31,33-38]</sup> and two systematic reviews<sup>[32,39]</sup> that addressed this PICO question. The RCTs compared intra-articular hyaluronic acid injections to an intra-articular saline control with oral NSAID use permitted. However, a published SR<sup>[39]</sup> found that studies that were double-blind with sham (saline) controls reported much smaller effects of HA on pain and function compared to sham treatment. The SR also identified unpublished data from 5 RCTs that found no between-group difference in pain and function for HA versus sham treatment. Since there was evidence of bias in small and unblinded RCTs, we only analyzed data from double-blind, sham-controlled RCTs with at least 30 patients/arm and 4 or more weeks of follow-up (Table 2). The results from 15 RCTs<sup>[4,5,11,13,17-21,23,25,36-38]</sup> that met these criteria suggest that HA injection led to a very small, not clinically significant improvement in pain and function compared to sham treatment.

Quality of evidence across all critical outcomes: Low

| <b>Table 1. Intra-Articular Hyaluronic Acid compared to Saline [Hip]</b> |                     |                      |                     |                    |                         |                                      |                            |                                |                                 |                                     |                                                |
|--------------------------------------------------------------------------|---------------------|----------------------|---------------------|--------------------|-------------------------|--------------------------------------|----------------------------|--------------------------------|---------------------------------|-------------------------------------|------------------------------------------------|
| <b>Certainty assessment</b>                                              |                     |                      |                     |                    |                         |                                      | <b>Summary of findings</b> |                                |                                 |                                     |                                                |
| <b>Nº of participants (studies) Follow-up</b>                            | <b>Risk of bias</b> | <b>Inconsistency</b> | <b>Indirectness</b> | <b>Imprecision</b> | <b>Publication bias</b> | <b>Overall certainty of evidence</b> | <b>Number of patients</b>  |                                | <b>Relative effect (95% CI)</b> | <b>Anticipated absolute effects</b> |                                                |
|                                                                          |                     |                      |                     |                    |                         |                                      | <b>With saline</b>         | <b>With IA Hyaluronic Acid</b> |                                 | <b>Risk with saline</b>             | <b>Risk difference with IA Hyaluronic Acid</b> |
|                                                                          |                     |                      |                     |                    |                         |                                      |                            |                                |                                 |                                     |                                                |

| Table 1. Intra-Articular Hyaluronic Acid compared to Saline [Hip]                        |             |             |             |                      |                            |                     |    |    |   |   |                                                     |
|------------------------------------------------------------------------------------------|-------------|-------------|-------------|----------------------|----------------------------|---------------------|----|----|---|---|-----------------------------------------------------|
| Certainty assessment                                                                     |             |             |             |                      |                            | Summary of findings |    |    |   |   |                                                     |
| <b>WOMAC pain (hip)- single injection (0-100, lower scores indicate improvement)</b>     |             |             |             |                      |                            |                     |    |    |   |   |                                                     |
| 85<br>(1 RCT)                                                                            | not serious | not serious | not serious | serious <sup>a</sup> | Publication bias suspected | ⊕⊕○○<br>LOW         | 43 | 42 | - | - | MD <b>1.1 lower</b><br>(11.08 lower to 8.88 higher) |
| <b>WOMAC function (hip)- single injection (0-100, lower scores indicate improvement)</b> |             |             |             |                      |                            |                     |    |    |   |   |                                                     |
| 85<br>(1 RCT)                                                                            | not serious | not serious | not serious | serious <sup>a</sup> | Publication bias suspected | ⊕⊕○○<br>LOW         | 43 | 42 | - | - | MD <b>1 higher</b><br>(8.08 lower to 10.08 higher)  |

## Explanations

a. Single small study

| Table 2. Intra-Articular Hyaluronic Acid compared to Sham Control [Knee] |  |               |              |             |                  |                     |                    |  |                              |
|--------------------------------------------------------------------------|--|---------------|--------------|-------------|------------------|---------------------|--------------------|--|------------------------------|
| Certainty assessment                                                     |  |               |              |             |                  | Summary of findings |                    |  |                              |
| Nº of participants                                                       |  | Inconsistency | Indirectness | Imprecision | Publication bias | Overall certainty   | Number of patients |  | Anticipated absolute effects |

**Table 2. Intra-Articular Hyaluronic Acid compared to Sham Control [Knee]**

| Certainty assessment                |                      |             |             |             |                                              |                | Summary of findings     |                               |                                |                                 |                                                                                                                               |
|-------------------------------------|----------------------|-------------|-------------|-------------|----------------------------------------------|----------------|-------------------------|-------------------------------|--------------------------------|---------------------------------|-------------------------------------------------------------------------------------------------------------------------------|
| (studies)<br>Follow-up              | Risk<br>of<br>bias   |             |             |             |                                              | of<br>evidence | With<br>sham<br>control | With IA<br>Hyaluronic<br>acid | Relative<br>effect<br>(95% CI) | Risk<br>with<br>sham<br>control | Risk<br>difference<br>with IA<br>Hyaluronic<br>acid                                                                           |
| <b>Pain (WOMAC or VAS combined)</b> |                      |             |             |             |                                              |                |                         |                               |                                |                                 |                                                                                                                               |
| 3387<br>(15 RCTs)                   | serious <sup>a</sup> | not serious | not serious | not serious | publication<br>bias<br>strongly<br>suspected | ⊕⊕○○<br>LOW    | 1620                    | 1767                          | -                              | -                               | SMD <b>0.13<br/>lower</b><br>(0.21 lower<br>to 0.06<br>lower)<br><br><b>Favors HA,<br/>not<br/>clinically<br/>significant</b> |
| <b>Function (WOMAC)</b>             |                      |             |             |             |                                              |                |                         |                               |                                |                                 |                                                                                                                               |
| 1827<br>(7 RCTs)                    | serious <sup>a</sup> | not serious | not serious | not serious | publication<br>bias<br>strongly<br>suspected | ⊕⊕○○<br>LOW    | 866                     | 961                           | -                              | -                               | SMD <b>0.16<br/>lower</b><br>(0.26 lower<br>to 0.05<br>lower)<br><br><b>Favors HA,<br/>not<br/>clinically<br/>significant</b> |

CI: Confidence interval; SMD: Standardized mean difference

**Explanations**

a. Several studies lacked information on randomization method and allocation concealment, some studies did not blind treating physicians.



**Table 3. RCT data not suitable for effect size calculation or combining with other data**

| Ref ID, Author, year | Study type | Duration | Population Description                                                                                                                    | Treatment given to relevant population                                                                                                                                                                          | Results                                                                                                                                                                                                                                                                                                                                                                                                                                                                                                                                                                                                                                                                                                                                                              |
|----------------------|------------|----------|-------------------------------------------------------------------------------------------------------------------------------------------|-----------------------------------------------------------------------------------------------------------------------------------------------------------------------------------------------------------------|----------------------------------------------------------------------------------------------------------------------------------------------------------------------------------------------------------------------------------------------------------------------------------------------------------------------------------------------------------------------------------------------------------------------------------------------------------------------------------------------------------------------------------------------------------------------------------------------------------------------------------------------------------------------------------------------------------------------------------------------------------------------|
| <b>KNEE</b>          |            |          |                                                                                                                                           |                                                                                                                                                                                                                 |                                                                                                                                                                                                                                                                                                                                                                                                                                                                                                                                                                                                                                                                                                                                                                      |
| 5498, Strand, 2012   | RCT        | 13 weeks | Pts with knee OA (KL grade 1-3). HA group (n=247, 40.5% males), 60.9 yrs +/- 10.24; control group (n=128, 39.8% males) 60.3 yrs +/- 9.97. | A single IA injection of Gel-200 (30 mg cross-linked HA in 3.0 mL) or PBS (3.0 mL) at week 0                                                                                                                    | Mean changes from baseline in WOMAC pain subscores demonstrated a statistically significant advantage of 6.39 mm for Gel-200 treatment over PBS at week 13 (P = 0.037; Fig. 2 and Table IIa). Group data provided on graph (SD not provided at group level). WOMAC physical function subscores showed a difference of 5.42 (0.47, 11.31) at week 13.                                                                                                                                                                                                                                                                                                                                                                                                                 |
| <b>HIP</b>           |            |          |                                                                                                                                           |                                                                                                                                                                                                                 |                                                                                                                                                                                                                                                                                                                                                                                                                                                                                                                                                                                                                                                                                                                                                                      |
| 3320, Atchia, 2010   | RCT        | 16 weeks | Patients with primary hip osteoarthritis. HA group (n=18, 7 males) 69 yrs ± 9; placebo (saline) (n=18, 7 males) 70 yrs ± 10               | standard care (non-injection group); normal saline (3 ml); non-animal stabilised hyaluronic acid (durolane, 3 ml/60 mg licensed for single injection) or methylprednisolone acetate (depomedrone, 3 ml/120 mg). | <p><u>Estimated from graph:</u></p> <p>WOMAC function at 56 days<br/>           Control (saline)= 7<br/>           Steroid= 5<br/>           HA=6<br/>           No-injection= 6.5<br/>           (p=0.04)</p> <p>WOMAC pain at 56 days<br/>           Control (saline)= 6.5<br/>           Steroid=5<br/>           HA=5.5<br/>           No-injection= 6.0<br/>           P=0.06</p> <p>The effect size (calculated as the mean change from baseline divided by the baseline SD) of the benefit from corticosteroid was large, becoming moderate by week 8: 1.5, 1.0 and 0.5 for NRS pain; 1.9, 1.1 and 0.6 for WOMAC pain; and 1.3, 0.9 and 0.4 for WOMAC function, at weeks 1, 4 and 8, respectively. There was a non-significant trend for improvement with</p> |

|                        |     |         |                                                                                                                                                                                                                                                                        |                                                                                                                                                                                                                                                                                                                        |                                                                                                                                                                                                                                                                                                                                                                                                                                                                                                                                                                                             |
|------------------------|-----|---------|------------------------------------------------------------------------------------------------------------------------------------------------------------------------------------------------------------------------------------------------------------------------|------------------------------------------------------------------------------------------------------------------------------------------------------------------------------------------------------------------------------------------------------------------------------------------------------------------------|---------------------------------------------------------------------------------------------------------------------------------------------------------------------------------------------------------------------------------------------------------------------------------------------------------------------------------------------------------------------------------------------------------------------------------------------------------------------------------------------------------------------------------------------------------------------------------------------|
|                        |     |         |                                                                                                                                                                                                                                                                        |                                                                                                                                                                                                                                                                                                                        | <p>saline injection at week 1 (effect size of 0.44 and 0.41 for NRS pain and WOMAC pain, respectively), which was not apparent at later assessments.</p> <p>Adverse: There was one confirmed case of post-arthroplasty infection (durolane group). Four patients in the durolane group had significant flare of symptoms within a few days of the injection. In one case septic arthritis had to be excluded and a diagnostic aspiration was performed at week 1, which excluded infection. The symptoms settled within a few days of the aspiration</p>                                    |
| 4774, Qvistgaard, 2006 | RCT | 90 days | Hip OA as defined by the ACR criteria <sup>29</sup> , radiographic changes of hip OA <sup>30</sup> , age above 18 years, stable medication for at least 3 weeks before inclusion. HA group (n=33, 61% females ) 65 yrs (14), Control (n=36, 61% females ) 64 yrs (11). | Patients were randomized to (1) one injection with 1 mL (40 mg Depo-medrol) methylprednisolone corticosteroid followed by two sham injections, (2) three injections of 2 mL HA (Hyalgan), or (3) three intra-articular injections of 2 mL saline water. Secondary outcome measures were WOMAC total scale and PGA VAS. | <p>Estimated from graph:<br/>Pain on walking (VAS) at 90 days<br/>HA group: 37 mm<br/>Saline (control): 41 mm</p> <p>“there was a significant treatment effect across all time-points (P Z 0.044), due to a significant improvement following corticosteroid compared to saline, SMD Steroid Z 0.6 (95% CI: 0.1e1.1, P Z 0.021) whereas HA compared to saline was SMDHA Z 0.4 (0.1 to 0.9; P Z 0.13). The difference between placebo (saline) and corticosteroid was significant at 14 and 28 days but vanished after 3 months (P14 days Z 0.006; P28 days Z 0.006; P3 months Z 0.58).”</p> |

## References

1. Richette P, Ravaud P, Conrozier T, Euller-Ziegler L, Mazieres B, Maugars Y, et al. Effect of hyaluronic acid in symptomatic hip osteoarthritis: a multicenter, randomized, placebo-controlled trial. *Arthritis Rheum.* 2009;60(3):824-830.
2. Qvistgaard E, Christensen R, Torp-Pedersen S, Bliddal H. Intra-articular treatment of hip osteoarthritis: a randomized trial of hyaluronic acid, corticosteroid, and isotonic saline. *Osteoarthritis Cartilage.* 2006;14(2):163-170.
3. Atchia I, Kane D, Reed MR, Isaacs JD, Birrell F. Efficacy of a single ultrasound-guided injection for the treatment of hip osteoarthritis. *Ann Rheum Dis.* 2011;70(1):110-116.
4. Karlsson J, Sjogren LS, Lohmander LS. Comparison of two hyaluronan drugs and placebo in patients with knee osteoarthritis. A controlled, randomized, double-blind, parallel-design multicentre study. *Rheumatology (Oxford).* 2002;41(11):1240-1248.

5. Altman RD, Rosen JE, Bloch DA, Hatoum HT, Korner P. A double-blind, randomized, saline-controlled study of the efficacy and safety of EUFLEXXA for treatment of painful osteoarthritis of the knee, with an open-label safety extension (the FLEXX trial). *Semin Arthritis Rheum*. 2009;39(1):1-9.
6. DeCaria JE, Montero-Odasso M, Wolfe D, Chesworth BM, Petrella RJ. The effect of intra-articular hyaluronic acid treatment on gait velocity in older knee osteoarthritis patients: a randomized, controlled study. *Arch Gerontol Geriatr*. 2012;55(2):310-315.
7. Diracoglu D, Vural M, Baskent A, Dikici F, Aksoy C. The effect of viscosupplementation on neuromuscular control of the knee in patients with osteoarthritis. *J Back Musculoskelet Rehabil*. 2009;22(1):1-9.
8. Raynauld JP, Goldsmith CH, Bellamy N, Torrance GW, Polisson R, Belovich D, et al. Effectiveness and safety of repeat courses of hylan G-F 20 in patients with knee osteoarthritis. *Osteoarthritis Cartilage*. 2005;13(2):111-119.
9. Petrella RJ, DiSilvestro MD, Hildebrand C. Effects of hyaluronate sodium on pain and physical functioning in osteoarthritis of the knee: a randomized, double-blind, placebo-controlled clinical trial. *Arch Intern Med*. 2002;162(3):292-298.
10. Navarro-Sarabia F, Coronel P, Collantes E, Navarro FJ, de la Serna AR, Naranjo A, et al. A 40-month multicentre, randomised placebo-controlled study to assess the efficacy and carry-over effect of repeated intra-articular injections of hyaluronic acid in knee osteoarthritis: the AMELIA project. *Ann Rheum Dis*. 2011;70(11):1957-1962.
11. Pham T, Le Henanff A, Ravaud P, Dieppe P, Paolozzi L, Dougados M. Evaluation of the symptomatic and structural efficacy of a new hyaluronic acid compound, NRD101, in comparison with diacerein and placebo in a 1 year randomised controlled study in symptomatic knee osteoarthritis. *Ann Rheum Dis*. 2004;63(12):1611-1617.
12. Dougados M, Nguyen M, Listrat V, Amor B. High molecular weight sodium hyaluronate (hyalectin) in osteoarthritis of the knee: a 1 year placebo-controlled trial. *Osteoarthritis Cartilage*. 1993;1(2):97-103.
13. Huskisson EC, Donnelly S. Hyaluronic acid in the treatment of osteoarthritis of the knee. *Rheumatology (Oxford)*. 1999;38(7):602-607.
14. Lohmander LS, Dalen N, Englund G, Hamalainen M, Jensen EM, Karlsson K, et al. Intra-articular hyaluronan injections in the treatment of osteoarthritis of the knee: a randomised, double blind, placebo controlled multicentre trial. Hyaluronan Multicentre Trial Group. *Ann Rheum Dis*. 1996;55(7):424-431.
15. Jorgensen A, Stengaard-Pedersen K, Simonsen O, Pfeiffer-Jensen M, Eriksen C, Bliddal H, et al. Intra-articular hyaluronan is without clinical effect in knee osteoarthritis: a multicentre, randomised, placebo-controlled, double-blind study of 337 patients followed for 1 year. *Ann Rheum Dis*. 2010;69(6):1097-1102.
16. Henderson EB, Smith EC, Pegley F, Blake DR. Intra-articular injections of 750 kD hyaluronan in the treatment of osteoarthritis: a randomised single centre double-blind placebo-controlled trial of 91 patients demonstrating lack of efficacy. *Ann Rheum Dis*. 1994;53(8):529-534.
17. Huang TL, Chang CC, Lee CH, Chen SC, Lai CH, Tsai CL. Intra-articular injections of sodium hyaluronate (Hyalgan(R)) in osteoarthritis of the knee. a randomized, controlled, double-blind, multicenter trial in the Asian population. *BMC Musculoskelet Disord*. 2011;12:221.
18. Lundsgaard C, Dufour N, Fallentin E, Winkel P, Gluud C. Intra-articular sodium hyaluronate 2 mL versus physiological saline 20 mL versus physiological saline 2 mL for painful knee osteoarthritis: a randomized clinical trial. *Scand J Rheumatol*. 2008;37(2):142-150.

19. Hangody L, Szody R, Lukasik P, Zgadzaj W, Lenart E, Dokoupilova E, et al. Intraarticular Injection of a Cross-Linked Sodium Hyaluronate Combined with Triamcinolone Hexacetonide (Cingal) to Provide Symptomatic Relief of Osteoarthritis of the Knee: A Randomized, Double-Blind, Placebo-Controlled Multicenter Clinical Trial. *Cartilage*. 2017;1947603517703732.
20. Altman RD, Moskowitz R. Intraarticular sodium hyaluronate (Hyalgan) in the treatment of patients with osteoarthritis of the knee: a randomized clinical trial. Hyalgan Study Group. *J Rheumatol*. 1998;25(11):2203-2212.
21. Baltzer AW, Moser C, Jansen SA, Krauspe R. Autologous conditioned serum (Orthokine) is an effective treatment for knee osteoarthritis. *Osteoarthritis Cartilage*. 2009;17(2):152-160.
22. Strand V, Baraf HS, Lavin PT, Lim S, Hosokawa H. A multicenter, randomized controlled trial comparing a single intra-articular injection of Gel-200, a new cross-linked formulation of hyaluronic acid, to phosphate buffered saline for treatment of osteoarthritis of the knee. *Osteoarthritis Cartilage*. 2012;20(5):350-356.
23. Petrella RJ, Petrella M. A prospective, randomized, double-blind, placebo controlled study to evaluate the efficacy of intraarticular hyaluronic acid for osteoarthritis of the knee. *J Rheumatol*. 2006;33(5):951-956.
24. Adams ME, Atkinson MH, Lussier AJ, Schulz JI, Siminovitch KA, Wade JP, et al. The role of viscosupplementation with hylan G-F 20 (Synvisc) in the treatment of osteoarthritis of the knee: a Canadian multicenter trial comparing hylan G-F 20 alone, hylan G-F 20 with non-steroidal anti-inflammatory drugs (NSAIDs) and NSAIDs alone. *Osteoarthritis Cartilage*. 1995;3(4):213-225.
25. Chevalier X, Jerosch J, Goupille P, van Dijk N, Luyten FP, Scott DL, et al. Single, intra-articular treatment with 6 ml hylan G-F 20 in patients with symptomatic primary osteoarthritis of the knee: a randomised, multicentre, double-blind, placebo controlled trial. *Ann Rheum Dis*. 2010;69(1):113-119.
26. Petrella RJ, Cogliano A, Decaria J. Combining two hyaluronic acids in osteoarthritis of the knee: a randomized, double-blind, placebo-controlled trial. *Clin Rheumatol*. 2008;27(8):975-981.
27. van der Weegen W, Wullems JA, Bos E, Noten H, van Drumpt RA. No difference between intra-articular injection of hyaluronic acid and placebo for mild to moderate knee osteoarthritis: a randomized, controlled, double-blind trial. *J Arthroplasty*. 2015;30(5):754-757.
28. Kotevoglu N, Iyibozkurt PC, Hiz O, Toktas H, Kuran B. A prospective randomised controlled clinical trial comparing the efficacy of different molecular weight hyaluronan solutions in the treatment of knee osteoarthritis. *Rheumatol Int*. 2006;26(4):325-330.
29. Kahan A, Lleu PL, Salin L. Prospective randomized study comparing the medicoeconomic benefits of Hylan GF-20 vs. conventional treatment in knee osteoarthritis. *Joint Bone Spine*. 2003;70(4):276-281.
30. Bunyaratavej N, Chan KM, Subramanian N. Treatment of painful osteoarthritis of the knee with hyaluronic acid. Results of a multicenter Asian study. *J Med Assoc Thai*. 2001;84 Suppl 2:S576-581.
31. Wobig M, Dickhut A, Maier R, Vetter G. Viscosupplementation with hylan G-F 20: a 26-week controlled trial of efficacy and safety in the osteoarthritic knee. *Clin Ther*. 1998;20(3):410-423.
32. Espallargues M, Pons JM. Efficacy and safety of viscosupplementation with Hylan G-F 20 for the treatment of knee osteoarthritis: a systematic review. *Int J Technol Assess Health Care*. 2003;19(1):41-56.
33. Brandt KD, Block JA, Michalski JP, Moreland LW, Caldwell JR, Lavin PT. Efficacy and safety of intra-articular sodium hyaluronate in knee osteoarthritis. *Clin Orth Rel Res* 2001;385:130-143.

34. Petrella RJ, Decaria J, Petrella MJ. Long term efficacy and safety of a combined low and high molecular weight hyaluronic acid in the treatment of osteoarthritis of the knee. *Rheumatol Reports* 2011;3:e4.
35. Carabba M, Paresce E, Angelini M, Re KA, Torchiana EEM, Perbellini A. The safety and efficacy of different dose schedules of hyaluronic acid in the treatment of painful osteoarthritis of the knee with joint effusion. *Eur J Rheumatol Inflamm* 1995;15:25-31.
36. Day R, Brooks P, Conaghan PG, Petersen M. A double blind, randomized, multicenter, parallel group study of the effectiveness and tolerance of intraarticular hyaluronan in osteoarthritis of the knee. *J Rheumatol*. 2004 Apr;31(4):775-82.
37. Jubb RW, Piva S, Beinat L, Dacre J, Gishen P. A one-year, randomised, placebo (saline) controlled clinical trial of 500-730 kDa sodium hyaluronate (Hyalgan) on the radiological change in osteoarthritis of the knee. *Int J Clin Pract*. 2003 Jul-Aug;57(6):467-74.
38. Neustadt D, Caldwell J, Bell M, Wade J, Gimbel J. Clinical effects of intraarticular injection of high molecular weight hyaluronan (Orthovisc) in osteoarthritis of the knee: a randomized, controlled, multicenter trial.
39. Rutjes AW, Jüni P, da Costa BR, Trelle S, Nüesch E, Reichenbach S. Viscosupplementation for osteoarthritis of the knee: a systematic review and meta-analysis. *Ann Intern Med*. 2012 Aug 7;157(3):180-91.

#### **PICO 42: Intra-articular platelet rich plasma compared to oral NSAIDs for knee or hip OA**

Summary: The literature search identified two RCTs<sup>[1,2]</sup> and three systematic reviews (two with meta-analyses)<sup>[3-5]</sup> that indirectly addressed this PICO question. The RCTs provided indirect evidence by comparing intra-articular platelet rich plasma to an intra-articular injection of phosphate buffered saline<sup>[1]</sup> or acetaminophen<sup>[2]</sup>. The systematic review<sup>[3]</sup> compared intra-articular PRP to intra-articular hyaluronic acid and the two systematic review and meta-analyses<sup>[4,5]</sup> compared to placebo injections (saline, local anesthetic). The two RCTs<sup>[1,2]</sup> reported lower WOMAC function and pain scores at 6 weeks, 3 months, 6 months, and 12 months (Table 1). The systematic review and meta-analyses<sup>[3-5]</sup> found improvements in pain and WOMAC scores across all time-points up to 12 months. One systematic review<sup>[5]</sup> reported an increased odds of adverse events for intra-articular PRP injections versus hyaluronic acid injections (Table 2). However, the lack of a standardized preparation and injection protocol makes it difficult to implement PRP in general practice and raises safety concerns that outweigh the small benefits identified in the literature.

Quality of evidence across all critical outcomes: Low

**Table 1. Intra-articular platelet rich plasma compared to saline or acetaminophen for Osteoarthritis**

| Certainty assessment                                                       |                      |                          |                      |                      |                  |                               | Summary of findings |                                           |                          |                              |                                                                                |
|----------------------------------------------------------------------------|----------------------|--------------------------|----------------------|----------------------|------------------|-------------------------------|---------------------|-------------------------------------------|--------------------------|------------------------------|--------------------------------------------------------------------------------|
| Nº of participants (studies)<br>Follow-up                                  | Risk of bias         | Inconsistency            | Indirectness         | Imprecision          | Publication bias | Overall certainty of evidence | Number of patients  |                                           | Relative effect (95% CI) | Anticipated absolute effects |                                                                                |
|                                                                            |                      |                          |                      |                      |                  |                               | With control        | With intra-articular platelet rich plasma |                          | Risk with control            | Risk difference with intra-articular platelet rich plasma                      |
| <b>WOMAC function - 6 weeks (0-68, lower scores indicate improvement)</b>  |                      |                          |                      |                      |                  |                               |                     |                                           |                          |                              |                                                                                |
| 65 (1 RCT)<br>5071                                                         | serious <sup>a</sup> | not serious              | serious <sup>c</sup> | serious <sup>d</sup> | none             | ⊕○○○<br>VERY LOW              | 32                  | 33                                        | -                        | -                            | MD <b>9.5 lower</b><br>(14.47 lower to 4.53 lower)<br><br><b>Favors plasma</b> |
| <b>WOMAC function - 3 months (0-68, lower scores indicate improvement)</b> |                      |                          |                      |                      |                  |                               |                     |                                           |                          |                              |                                                                                |
| 95 (2 RCTs)<br>4649, 5071                                                  | serious <sup>a</sup> | not serious <sup>b</sup> | serious <sup>c</sup> | not serious          | none             | ⊕⊕○○<br>LOW                   | 47                  | 48                                        | -                        | -                            | MD <b>14.79 lower</b><br>(24.58 lower to 5 lower)<br><br><b>Favors plasma</b>  |
| <b>WOMAC function - 6 months (0-68, lower scores indicate improvement)</b> |                      |                          |                      |                      |                  |                               |                     |                                           |                          |                              |                                                                                |

**Table 1. Intra-articular platelet rich plasma compared to saline or acetaminophen for Osteoarthritis**

| Certainty assessment                                                        |                      |                          |                        |                      |      | Summary of findings |    |    |   |   |                                                                             |
|-----------------------------------------------------------------------------|----------------------|--------------------------|------------------------|----------------------|------|---------------------|----|----|---|---|-----------------------------------------------------------------------------|
| 95<br>(2 RCTs)<br>4649, 5071                                                | serious <sup>a</sup> | not serious <sup>b</sup> | serious <sup>c</sup>   | not serious          | none | ⊕⊕○○<br>LOW         | 47 | 48 | - | - | MD <b>15.61 lower</b><br>(29.51 lower to 1.7 lower)<br><b>Favors plasma</b> |
| <b>WOMAC function - 12 months (0-68, lower scores indicate improvement)</b> |                      |                          |                        |                      |      |                     |    |    |   |   |                                                                             |
| 30<br>(1 RCT)<br>4649                                                       | not serious          | not serious              | serious <sup>c,e</sup> | serious <sup>d</sup> | none | ⊕⊕○○<br>LOW         | 15 | 15 | - | - | MD <b>23 lower</b><br>(30.37 lower to 15.63 lower)<br><b>Favors plasma</b>  |
| <b>WOMAC pain - 6 weeks (0-20, lower scores indicate improvement)</b>       |                      |                          |                        |                      |      |                     |    |    |   |   |                                                                             |
| 65<br>(1 RCT)<br>5071                                                       | serious <sup>a</sup> | not serious              | serious <sup>c</sup>   | serious <sup>d</sup> | none | ⊕○○○<br>VERY LOW    | 32 | 33 | - | - | MD <b>2.7 lower</b><br>(4.04 lower to 1.36 lower)<br><b>Favors plasma</b>   |
| <b>WOMAC pain - 3 months (0-20, lower scores indicate improvement)</b>      |                      |                          |                        |                      |      |                     |    |    |   |   |                                                                             |

**Table 1. Intra-articular platelet rich plasma compared to saline or acetaminophen for Osteoarthritis**

| Certainty assessment                                                    |                      |                          |                      |                      |      | Summary of findings |    |    |   |   |                                                                                |
|-------------------------------------------------------------------------|----------------------|--------------------------|----------------------|----------------------|------|---------------------|----|----|---|---|--------------------------------------------------------------------------------|
| 95<br>(2 RCTs)<br>4649, 5071                                            | serious <sup>a</sup> | not serious <sup>b</sup> | serious <sup>c</sup> | not serious          | none | ⊕⊕○○<br>LOW         | 47 | 48 | - | - | MD <b>4.43 lower</b><br>(7.36 lower to 1.49 lower)<br><br><b>Favors plasma</b> |
| <b>WOMAC pain - 6 months (0-20, lower scores indicate improvement)</b>  |                      |                          |                      |                      |      |                     |    |    |   |   |                                                                                |
| 30<br>(1 RCT)<br>4649                                                   | not serious          | not serious              | serious <sup>c</sup> | serious <sup>d</sup> | none | ⊕⊕○○<br>LOW         | 15 | 15 | - | - | MD <b>6 lower</b><br>(8.04 lower to 3.96 lower)<br><br><b>Favors plasma</b>    |
| <b>WOMAC pain - 12 months (0-20, lower scores indicate improvement)</b> |                      |                          |                      |                      |      |                     |    |    |   |   |                                                                                |
| 30<br>(1 RCT)<br>4649                                                   | not serious          | not serious              | serious <sup>c</sup> | serious <sup>d</sup> | none | ⊕⊕○○<br>LOW         | 15 | 15 | - | - | MD <b>7 lower</b><br>(9.58 lower to 4.42 lower)<br><br><b>Favors plasma</b>    |

**CI:** Confidence interval; **MD:** Mean difference

## Explanations

a. 5071\_Mendia: Not blinded



b. Although statistical heterogeneity was moderate to high, the direction of effect is consistent and the difference in effect sizes are unlikely to change clinical decisions.

c. Both studies compared to acetaminophen and not NSAIDs

d. Single small study

**Table 2. Systematic review data**

| Ref ID, Author, year | Study type                           | Duration        | Population Description                                                                                                                    | Treatment given to relevant population                                                                                                            | Results                                                                                                                                                                                                                                                                                                                                                                                                                                                                                                                                                                                 |
|----------------------|--------------------------------------|-----------------|-------------------------------------------------------------------------------------------------------------------------------------------|---------------------------------------------------------------------------------------------------------------------------------------------------|-----------------------------------------------------------------------------------------------------------------------------------------------------------------------------------------------------------------------------------------------------------------------------------------------------------------------------------------------------------------------------------------------------------------------------------------------------------------------------------------------------------------------------------------------------------------------------------------|
| 2999, Tietze, 2014   | Systematic review                    | Up to 12 months | 13 articles met the inclusion criteria: 12 focused on knee OA, and 1 on hip OA.                                                           | intraarticular PRP injections for the treatment of large-joint OA                                                                                 | All studies showed statistically significant improvement in patient outcome scores with PRP. Platelet-rich plasma has a statistically significant benefit in knee OA when compared with hyaluronic acid. The benefit from PRP appears to last between 6 and 12 months.<br><br>Pain was primary focus measured by (VAS, KOOS, WOMAC, Lesquene).                                                                                                                                                                                                                                          |
| 1120, Chang, 2014    | Systematic review with meta-analysis | Up to 12 months | Eight single-arm studies, 3 quasi-experimental studies, and 5 randomized controlled trials were identified, comprising 1543 participants. | PRP to treat knee chondral degenerative lesions                                                                                                   | Compared with the preinjection condition, the authors found a pooled effect size of 2.31 (95% CI, 1.53e3.09) at 2 months, 2.52 (95% CI, 1.94e3.09) at 6 months, and 2.88 (95% CI, .97e4.79) at 12 months, which all favored the status after PRP treatment.<br><br>**NOTE- I <sup>2</sup> statistic was 97.3%, 96.3%, and 98.6%<br><br>Function (effect) was measured by IKDC, KOOS, and WOMAC.                                                                                                                                                                                         |
| 2375, Riboh, 2015    | Systematic review with meta-analysis | ?unclear        | 6 randomized controlled trials (evidence level 1) and 3 prospective comparative studies (evidence level 2) with a total of 1055 patients  | Review focused on leukocyte rich vs leukocyte poor PRP injections compared to placebo injections, including normal saline and/or local anesthetic | Injection of LP-PRP resulted in significantly better WOMAC scores than did injection of hyaluronic acid (mean difference, -21.14; 95% CI, -39.63 to -2.65) or placebo (mean difference, -17.84; 95% CI, -34.95 to -0.73). No such difference was observed with LR-PRP (mean difference, -14.28; 95% CI, -44.80 to 16.25).<br><br>PRP injections resulted in a higher incidence of adverse reactions than hyaluronic acid (odds ratio, 5.63; 95% CI, 1.38-22.90), but there was no difference between LR-PRP and LP-PRP (odds ratio, 0.78; 95% CI, 0.05-11.93) [17/1055 total patients]. |

**References**

1. Smith PA. Intra-articular Autologous Conditioned Plasma Injections Provide Safe and Efficacious Treatment for Knee Osteoarthritis: An FDA-Sanctioned, Randomized, Double-blind, Placebo-controlled Clinical Trial. *Am J Sports Med.* 2016;44(4):884-891.
2. Simental-Mendia M, Vilchez-Cavazos JF, Pena-Martinez VM, Said-Fernandez S, Lara-Arias J, Martinez-Rodriguez HG. Leukocyte-poor platelet-rich plasma is more effective than the conventional therapy with acetaminophen for the treatment of early knee osteoarthritis. *Arch Orthop Trauma Surg.* 2016;136(12):1723-1732.
3. Tietze DC, Geissler K, Borchers J. The effects of platelet-rich plasma in the treatment of large-joint osteoarthritis: a systematic review. *Phys Sportsmed.* 2014;42(2):27-37.
4. Chang KV, Hung CY, Aliwarga F, Wang TG, Han DS, Chen WS. Comparative effectiveness of platelet-rich plasma injections for treating knee joint cartilage degenerative pathology: a systematic review and meta-analysis. *Arch Phys Med Rehabil.* 2014;95(3):562-575.
5. Riboh JC, Saltzman BM, Yanke AB, Fortier L, Cole BJ. Effect of Leukocyte Concentration on the Efficacy of Platelet-Rich Plasma in the Treatment of Knee Osteoarthritis. *Am J Sports Med.* 2016;44(3):792-800.

**PICO 43: Intra-articular stem cells compared to oral NSAIDs for knee or hip OA**

Summary: The literature search identified one RCT<sup>[1]</sup> that addressed this PICO question. The RCT provided indirect evidence by comparing intra-articular stem cell injection to placebo injection (plasmalyte); NSAID use was permitted but not part of the allocated intervention. None of the between-group differences in VAS pain scores were statistically significant. Lower concentrations of stem cells (25 million cells) tended to have larger mean differences in pain VAS scores, especially at 12 months, compared to placebo. However, this RCT<sup>[1]</sup> was a small RCT with 15 participants (10 active, 5 placebo) per stem cell concentration, so all of the findings are imprecise; further large scales studies are warranted. There was not an increased risk of adverse events for participants receiving intra-articular stem cells compared to placebo, but there were too few events to identify differences in adverse event rates (Table 1).

A literature search update in August 2018 identified an additional relevant double-blind RCT<sup>[2]</sup> that compared intra-articular TissueGene chondrocytes (TG-C) to placebo saline injection in patients with knee OA. Although the TG-C group showed significantly greater improvement in VAS pain (26 and 39 weeks), KOOS pain (26, 39, and 52 weeks), and KOOS ADL (only at 26 weeks), serious adverse events were significantly more frequent in the TG-C group (11 vs. 0) (Table 2).

Quality of evidence across all critical outcomes: Low

| <b>Table 1. Stem cells compared to control injection for Osteoarthritis</b> |  |                      |                     |                    |                         |                          |                            |  |                                     |
|-----------------------------------------------------------------------------|--|----------------------|---------------------|--------------------|-------------------------|--------------------------|----------------------------|--|-------------------------------------|
| <b>Certainty assessment</b>                                                 |  |                      |                     |                    |                         |                          | <b>Summary of findings</b> |  |                                     |
| <b>Nº of participants</b>                                                   |  | <b>Inconsistency</b> | <b>Indirectness</b> | <b>Imprecision</b> | <b>Publication bias</b> | <b>Overall certainty</b> | <b>Number of patients</b>  |  | <b>Anticipated absolute effects</b> |
|                                                                             |  |                      |                     |                    |                         |                          |                            |  |                                     |

**Table 1. Stem cells compared to control injection for Osteoarthritis**

| <b>Table 1. Stem cells compared to control injection for Osteoarthritis</b>            |                             |             |                      |                      |      |                        |                            |                                |                                         |                                  |                                                                    |
|----------------------------------------------------------------------------------------|-----------------------------|-------------|----------------------|----------------------|------|------------------------|----------------------------|--------------------------------|-----------------------------------------|----------------------------------|--------------------------------------------------------------------|
| <b>Certainty assessment</b>                                                            |                             |             |                      |                      |      |                        | <b>Summary of findings</b> |                                |                                         |                                  |                                                                    |
| <b>(studies)<br/>Follow-up</b>                                                         | <b>Risk<br/>of<br/>bias</b> |             |                      |                      |      | <b>of<br/>evidence</b> | <b>With<br/>control</b>    | <b>With<br/>stem<br/>cells</b> | <b>Relative<br/>effect<br/>(95% CI)</b> | <b>Risk<br/>with<br/>control</b> | <b>Risk<br/>difference<br/>with stem<br/>cells</b>                 |
| <b>Pain VAS-25 million cells - 1 month (0-100, lower scores indicate improvement)</b>  |                             |             |                      |                      |      |                        |                            |                                |                                         |                                  |                                                                    |
| 15<br>(1 RCT)                                                                          | not<br>serious              | not serious | serious <sup>a</sup> | serious <sup>b</sup> | none | ⊕⊕○○<br>LOW            | 10                         | 10                             | -                                       | -                                | MD <b>9.3<br/>lower</b><br>(35.63<br>lower to<br>17.03<br>higher)  |
| <b>Pain VAS-25 million cells - 3 month (0-100, lower scores indicate improvement)</b>  |                             |             |                      |                      |      |                        |                            |                                |                                         |                                  |                                                                    |
| 20<br>(1 RCT)                                                                          | not<br>serious              | not serious | serious <sup>a</sup> | serious <sup>b</sup> | none | ⊕⊕○○<br>LOW            | 10                         | 10                             | -                                       | -                                | MD <b>13.1<br/>lower</b><br>(36.87<br>lower to<br>10.67<br>higher) |
| <b>Pain VAS-25 million cells - 6 month (0-100, lower scores indicate improvement)</b>  |                             |             |                      |                      |      |                        |                            |                                |                                         |                                  |                                                                    |
| 20<br>(1 RCT)                                                                          | not<br>serious              | not serious | serious <sup>a</sup> | serious <sup>b</sup> | none | ⊕⊕○○<br>LOW            | 10                         | 10                             | -                                       | -                                | MD <b>20.9<br/>lower</b><br>(42.08<br>lower to<br>0.28 higher)     |
| <b>Pain VAS-25 million cells - 12 month (0-100, lower scores indicate improvement)</b> |                             |             |                      |                      |      |                        |                            |                                |                                         |                                  |                                                                    |

**Table 1. Stem cells compared to control injection for Osteoarthritis**

| Certainty assessment                                                                   |             |             |                      |                      |      |             | Summary of findings |    |   |   |                                                       |
|----------------------------------------------------------------------------------------|-------------|-------------|----------------------|----------------------|------|-------------|---------------------|----|---|---|-------------------------------------------------------|
| 20<br>(1 RCT)                                                                          | not serious | not serious | serious <sup>a</sup> | serious <sup>b</sup> | none | ⊕⊕○○<br>LOW | 10                  | 10 | - | - | MD <b>19 lower</b><br>(39.56 lower to 1.56 higher)    |
| <b>Pain VAS-50 million cells - 1 month (0-100, lower scores indicate improvement)</b>  |             |             |                      |                      |      |             |                     |    |   |   |                                                       |
| 20<br>(1 RCT)                                                                          | not serious | not serious | serious <sup>a</sup> | serious <sup>b</sup> | none | ⊕⊕○○<br>LOW | 10                  | 10 | - | - | MD <b>9.6 lower</b><br>(37.5 lower to 18.3 higher)    |
| <b>Pain VAS-50 million cells - 3 month (0-100, lower scores indicate improvement)</b>  |             |             |                      |                      |      |             |                     |    |   |   |                                                       |
| 20<br>(1 RCT)                                                                          | not serious | not serious | serious <sup>a</sup> | serious <sup>b</sup> | none | ⊕⊕○○<br>LOW | 10                  | 10 | - | - | MD <b>7.1 higher</b><br>(19.14 lower to 33.34 higher) |
| <b>Pain VAS-50 million cells - 6 month (0-100, lower scores indicate improvement)</b>  |             |             |                      |                      |      |             |                     |    |   |   |                                                       |
| 20<br>(1 RCT)                                                                          | not serious | not serious | serious <sup>a</sup> | serious <sup>b</sup> | none | ⊕⊕○○<br>LOW | 10                  | 10 | - | - | MD <b>0.3 higher</b><br>(29.22 lower to 29.82 higher) |
| <b>Pain VAS-50 million cells - 12 month (0-100, lower scores indicate improvement)</b> |             |             |                      |                      |      |             |                     |    |   |   |                                                       |

**Table 1. Stem cells compared to control injection for Osteoarthritis**

| <b>Table 1. Stem cells compared to control injection for Osteoarthritis</b>           |             |             |                      |                      |      |             |                            |    |   |   |                                                       |
|---------------------------------------------------------------------------------------|-------------|-------------|----------------------|----------------------|------|-------------|----------------------------|----|---|---|-------------------------------------------------------|
| <b>Certainty assessment</b>                                                           |             |             |                      |                      |      |             | <b>Summary of findings</b> |    |   |   |                                                       |
| 20<br>(1 RCT)                                                                         | not serious | not serious | serious <sup>a</sup> | serious <sup>b</sup> | none | ⊕⊕○○<br>LOW | 10                         | 10 | - | - | MD <b>3.7 higher</b><br>(28.19 lower to 35.59 higher) |
| <b>Pain VAS-75 million cells - 1 month (0-100, lower scores indicate improvement)</b> |             |             |                      |                      |      |             |                            |    |   |   |                                                       |
| 20<br>(1 RCT)                                                                         | not serious | not serious | serious <sup>a</sup> | serious <sup>b</sup> | none | ⊕⊕○○<br>LOW | 10                         | 10 | - | - | MD <b>14.1 higher</b><br>(9.33 lower to 37.53 higher) |
| <b>Pain VAS-75 million cells - 3 month (0-100, lower scores indicate improvement)</b> |             |             |                      |                      |      |             |                            |    |   |   |                                                       |
| 20<br>(1 RCT)                                                                         | not serious | not serious | serious <sup>a</sup> | serious <sup>b</sup> | none | ⊕⊕○○<br>LOW | 10                         | 10 | - | - | MD <b>3.4 higher</b><br>(28.79 lower to 35.59 higher) |
| <b>Pain VAS-75 million cells - 6 month 0-100, (lower scores indicate improvement)</b> |             |             |                      |                      |      |             |                            |    |   |   |                                                       |
| 20<br>(1 RCT)                                                                         | not serious | not serious | serious <sup>a</sup> | serious <sup>b</sup> | none | ⊕⊕○○<br>LOW | 10                         | 10 | - | - | MD <b>6.3 lower</b><br>(34.75 lower to 22.15 higher)  |

**Table 1. Stem cells compared to control injection for Osteoarthritis**

| Certainty assessment                                                                   |             |             |                      |                      |      | Summary of findings |    |    |   |   |                                                       |
|----------------------------------------------------------------------------------------|-------------|-------------|----------------------|----------------------|------|---------------------|----|----|---|---|-------------------------------------------------------|
| <b>Pain VAS-75 million cells - 12 month (0-100, lower scores indicate improvement)</b> |             |             |                      |                      |      |                     |    |    |   |   |                                                       |
| 20<br>(1 RCT)                                                                          | not serious | not serious | serious <sup>a</sup> | serious <sup>b</sup> | none | ⊕⊕○○<br>LOW         | 10 | 10 | - | - | MD <b>2.2 lower</b><br>(32.13 lower to 27.73 higher)  |
| <b>Pain VAS-150 million cells - 1 month (0-100, lower scores indicate improvement)</b> |             |             |                      |                      |      |                     |    |    |   |   |                                                       |
| 20<br>(1 RCT)                                                                          | not serious | not serious | serious <sup>a</sup> | serious <sup>b</sup> | none | ⊕⊕○○<br>LOW         | 10 | 10 | - | - | MD <b>7.2 lower</b><br>(32.87 lower to 18.47 higher)  |
| <b>Pain VAS-150 million cells - 3 month (0-100, lower scores indicate improvement)</b> |             |             |                      |                      |      |                     |    |    |   |   |                                                       |
| 20<br>(1 RCT)                                                                          | not serious | not serious | serious <sup>a</sup> | serious <sup>b</sup> | none | ⊕⊕○○<br>LOW         | 10 | 10 | - | - | MD <b>15.2 lower</b><br>(44.49 lower to 14.09 higher) |
| <b>Pain VAS-150 million cells - 6 month (0-100, lower scores indicate improvement)</b> |             |             |                      |                      |      |                     |    |    |   |   |                                                       |

**Table 1. Stem cells compared to control injection for Osteoarthritis**

| <b>Table 1. Stem cells compared to control injection for Osteoarthritis</b>             |             |             |                      |                      |      |             |                            |                 |                                   |               |                                                       |
|-----------------------------------------------------------------------------------------|-------------|-------------|----------------------|----------------------|------|-------------|----------------------------|-----------------|-----------------------------------|---------------|-------------------------------------------------------|
| <b>Certainty assessment</b>                                                             |             |             |                      |                      |      |             | <b>Summary of findings</b> |                 |                                   |               |                                                       |
| 20<br>(1 RCT)                                                                           | not serious | not serious | serious <sup>a</sup> | serious <sup>b</sup> | none | ⊕⊕○○<br>LOW | 10                         | 10              | -                                 | -             | MD <b>0.2 higher</b><br>(31.82 lower to 32.22 higher) |
| <b>Pain VAS-150 million cells - 12 month (0-100, lower scores indicate improvement)</b> |             |             |                      |                      |      |             |                            |                 |                                   |               |                                                       |
| 20<br>(1 RCT)                                                                           | not serious | not serious | serious <sup>a</sup> | serious <sup>b</sup> | none | ⊕⊕○○<br>LOW | 10                         | 10              | -                                 | -             | MD <b>6.1 higher</b><br>(24.73 lower to 36.93 higher) |
| <b>Severe Adverse Events - 25 million cells</b>                                         |             |             |                      |                      |      |             |                            |                 |                                   |               |                                                       |
| 20<br>(1 RCT)                                                                           | not serious | not serious | serious <sup>a</sup> | serious <sup>b</sup> | none | ⊕⊕○○<br>LOW | 1/10<br>(10.0%)            | 1/10<br>(10.0%) | <b>OR 1.00</b><br>(0.05 to 18.57) | 100 per 1,000 | <b>0 fewer per 1,000</b><br>(94 fewer to 574 more)    |
| <b>Severe Adverse Events - 50 million cells</b>                                         |             |             |                      |                      |      |             |                            |                 |                                   |               |                                                       |
| 20<br>(1 RCT)                                                                           | not serious | not serious | serious <sup>a</sup> | serious <sup>b</sup> | none | ⊕⊕○○<br>LOW | 1/10<br>(10.0%)            | 1/10<br>(10.0%) | <b>OR 1.00</b><br>(0.05 to 18.57) | 100 per 1,000 | <b>0 fewer per 1,000</b><br>(94 fewer to 574 more)    |
| <b>Severe Adverse Events - 75 million cells</b>                                         |             |             |                      |                      |      |             |                            |                 |                                   |               |                                                       |

| Table 1. Stem cells compared to control injection for Osteoarthritis |             |             |                      |                      |      |                     |                 |                 |                                   |               |                                                    |
|----------------------------------------------------------------------|-------------|-------------|----------------------|----------------------|------|---------------------|-----------------|-----------------|-----------------------------------|---------------|----------------------------------------------------|
| Certainty assessment                                                 |             |             |                      |                      |      | Summary of findings |                 |                 |                                   |               |                                                    |
| 20<br>(1 RCT)                                                        | not serious | not serious | serious <sup>a</sup> | serious <sup>b</sup> | none | ⊕⊕○○<br>LOW         | 1/10<br>(10.0%) | 1/10<br>(10.0%) | <b>OR 1.00</b><br>(0.05 to 18.57) | 100 per 1,000 | <b>0 fewer per 1,000</b><br>(94 fewer to 574 more) |
| <b>Severe Adverse Events - 150 million cells</b>                     |             |             |                      |                      |      |                     |                 |                 |                                   |               |                                                    |
| 20<br>(1 RCT)                                                        | not serious | not serious | serious <sup>a</sup> | serious <sup>b</sup> | none | ⊕⊕○○<br>LOW         | 1/10<br>(10.0%) | 1/10<br>(10.0%) | <b>OR 1.00</b><br>(0.05 to 18.57) | 100 per 1,000 | <b>0 fewer per 1,000</b><br>(94 fewer to 574 more) |

**CI:** Confidence interval; **MD:** Mean difference; **OR:** Odds ratio

## Explanations

- a. Stem Cells vs. Placebo injection; NSAID use permitted but not directly compared
- b. Wide 95% CI that overlaps with the line of no effect
- c. Differential findings: stem cells favored at 1 month; control favored at 3 months and 12 months; no difference at 6 months
- d. Differential findings: control favored at 1 month, 3 months; stem cells favored at 6 months and 12 months
- e. Differential findings: stem cells favored at 1 month, 3 months; control favored at 6 months and 12 months

**Table 2. Additional RCT data not suitable for combined analysis with other studies**

| Ref ID, Author, year       | Study type | Duration  | Population Description               | Treatment given to relevant population                                       | Results                                                                                                                                                                               |
|----------------------------|------------|-----------|--------------------------------------|------------------------------------------------------------------------------|---------------------------------------------------------------------------------------------------------------------------------------------------------------------------------------|
| 8661<br>Kim et al.<br>2018 | RCT        | 12 months | 163 patients with knee OA (Kellgren- | Intra-articular TissueGene-C (TG-C) chondrocytes or placebo saline injection | <b>VAS pain</b> at 26 and 39 weeks favored TG-C (p=0.02 and 0.004, respectively).<br><b>KOOS pain</b> at 26, 39, and 52 weeks favored TG-C (p=0.002, 0.003, and 0.001, respectively). |



|  |  |  |                   |  |                                                                                                                                                                                  |
|--|--|--|-------------------|--|----------------------------------------------------------------------------------------------------------------------------------------------------------------------------------|
|  |  |  | Lawrence grade 3) |  | <b>KOOS ADL</b> significantly favored TG-C only at 26 weeks ( $p = 0.02$ ).<br><br><b>Serious adverse events:</b> TG-C: 11 vs saline: 0 ( $p = 0.0003$ favoring saline placebo). |
|--|--|--|-------------------|--|----------------------------------------------------------------------------------------------------------------------------------------------------------------------------------|

## References

1. Gupta PK, Chullikana A, Rengasamy M, Shetty N, Pandey V, Agarwal V, et al. Efficacy and safety of adult human bone marrow-derived, cultured, pooled, allogeneic mesenchymal stromal cells (Stempeucel(R)): preclinical and clinical trial in osteoarthritis of the knee joint. *Arthritis Res Ther.* 2016;18(1):301.
2. Kim MK, Ha CW, In Y, Cho SD, Choi ES, Ha JK, et al. A Multicenter, Double-Blind, Phase III Clinical Trial to Evaluate the Efficacy and Safety of a Cell and Gene Therapy in Knee Osteoarthritis Patients. *Hum Gene Ther Clin Dev.* 2018;29:48-59.

### PICO 44: Intra-articular dextrose prolotherapy compared to oral NSAIDs for knee or hip OA

**Summary:** The literature search identified two RCTs<sup>[1,2]</sup> that addressed this PICO question. The RCTs provided indirect evidence by comparing dextrose prolotherapy to saline injection for osteoarthritis; one study discouraged NSAID use during the study period and the other<sup>[2]</sup> did not comment on NSAID use. Rabago et al.<sup>[1]</sup> found that dextrose prolotherapy had a lower mean difference in WOMAC pain and function compared to saline placebo. In patients with and without anterior cruciate ligament laxity (ACL)<sup>[2]</sup>, dextrose prolotherapy was associated with better outcomes (pain at rest, pain with walking, pain with stair use, swelling, buckling episodes, and flexion range;  $p=0.015$ ).

Quality of evidence across all critical outcomes: Low

| <b>Table 1. Dextrose prolotherapy compared to saline injection for knee OA</b> |  |               |              |             |                  |                   |                     |                 |                              |
|--------------------------------------------------------------------------------|--|---------------|--------------|-------------|------------------|-------------------|---------------------|-----------------|------------------------------|
| Certainty assessment                                                           |  |               |              |             |                  |                   | Summary of findings |                 |                              |
| Nº of participants                                                             |  | Inconsistency | Indirectness | Imprecision | Publication bias | Overall certainty | Number of patients  | Relative effect | Anticipated absolute effects |
|                                                                                |  |               |              |             |                  |                   |                     |                 |                              |

| Table 1. Dextrose prolotherapy compared to saline injection for knee OA |                    |             |                      |                      |      |                |                                        |                                  |             |                                                |                                                                                                 |
|-------------------------------------------------------------------------|--------------------|-------------|----------------------|----------------------|------|----------------|----------------------------------------|----------------------------------|-------------|------------------------------------------------|-------------------------------------------------------------------------------------------------|
| Certainty assessment                                                    |                    |             |                      |                      |      |                | Summary of findings                    |                                  |             |                                                |                                                                                                 |
| (studies)<br>Follow-up                                                  | Risk<br>of<br>bias |             |                      |                      |      | of<br>evidence | With<br>saline<br>injection<br>control | With<br>dextrose<br>prolotherapy | (95%<br>CI) | Risk<br>with<br>saline<br>injection<br>control | Risk<br>difference<br>with<br>dextrose<br>prolotherapy                                          |
| <b>WOMAC pain (0-100, lower scores indicate improvement)</b>            |                    |             |                      |                      |      |                |                                        |                                  |             |                                                |                                                                                                 |
| 51<br>(1 RCT)                                                           | not<br>serious     | not serious | serious <sup>a</sup> | serious <sup>b</sup> | none | ⊕⊕○○<br>LOW    | 24                                     | 27                               | -           | -                                              | MD <b>5.99<br/>lower</b><br>(8 lower to<br>3.98 lower)<br><br><b>Favors<br/>prolotherapy</b>    |
| <b>WOMAC function (0-100, lower scores indicate improvement)</b>        |                    |             |                      |                      |      |                |                                        |                                  |             |                                                |                                                                                                 |
| 51<br>(1 RCT)                                                           | not<br>serious     | not serious | serious <sup>a</sup> | serious <sup>b</sup> | none | ⊕⊕○○<br>LOW    | 24                                     | 27                               | -           | -                                              | MD <b>7.97<br/>lower</b><br>(9.85 lower to<br>6.09 lower)<br><br><b>Favors<br/>prolotherapy</b> |

**CI:** Confidence interval; **MD:** Mean difference

## Explanations

<sup>a</sup>Indirect comparison – PRP vs saline

<sup>b</sup>Single study with small number of patients

**Table 2. Additional RCT data**

| Ref ID, Author, year | Study type | Duration  | Population Description                                                                                                                                                                                                                                                                                              | Treatment given to relevant population                                                                                                                                                                                                                                                              | Results                                                                                                                                                                                                                                                                                                                                                                                                                                                                                                                                                                                                      |
|----------------------|------------|-----------|---------------------------------------------------------------------------------------------------------------------------------------------------------------------------------------------------------------------------------------------------------------------------------------------------------------------|-----------------------------------------------------------------------------------------------------------------------------------------------------------------------------------------------------------------------------------------------------------------------------------------------------|--------------------------------------------------------------------------------------------------------------------------------------------------------------------------------------------------------------------------------------------------------------------------------------------------------------------------------------------------------------------------------------------------------------------------------------------------------------------------------------------------------------------------------------------------------------------------------------------------------------|
| 6736, Reeves, 2000   | RCT        | 12 months | 68 patients with knee OA with and without ACL laxity. ACL laxity+ group: 13 trx with dextrose.<br><br>**Note total group (n=68) findings (table 1) did not report pts per group and could not be entered into revman. ACL subgroup findings (Table 3) included open-label phase and also couldn't be put in Revman. | Three bimonthly injections of 9 cc of either 10% dextrose and .075% lidocaine in bacteriostatic water (active solution) versus an identical control solution absent 10% dextrose. The dextrose - treated joints then received 3 further bimonthly injections of 10% dextrose in open-label fashion. | ACL laxity+ at 6 months:<br>Pain VAS at rest: (dextrose, n=13)) 1.61 (1.71) vs (saline control, n=12) 1.69 (1.73).<br><br>Pain VAS walking: (dextrose, n=13)) 2.56 (1.97) vs (saline control, n=12) 2.85 (2.2).<br><br>Total group findings (w/ w/o ACL laxity):<br>Hotelling multivariate analysis of paired observations between 0 and 6 months for active and control solution including all nonradiographic variables (pain at rest, pain with walking, pain with stair use, swelling, buckling episodes, and flexion range) demonstrated a statistically superior effect of active solution (P = .015). |

\*Note PICO 44 is compared to oral NSAIDs.

**References**

1. Rabago D, Patterson JJ, Mundt M, Kijowski R, Grettie J, Segal NA, et al. Dextrose prolotherapy for knee osteoarthritis: a randomized controlled trial. *Annals of family medicine*. 2013;11(3):229-237.
2. Reeves KD, Hassanein K. Randomized prospective double-blind placebo-controlled study of dextrose prolotherapy for knee osteoarthritis with or without ACL laxity. *Alternative therapies in health and medicine*. 2000;6(2):68-74, 77-80.

**PICO 45: Intra-articular botulinum compared to oral NSAIDs for knee or hip OA**

Summary: The literature search identified four randomized controlled trials that addressed this PICO question<sup>[1-4]</sup>. The RCTs provided indirect evidence by comparing intra-articular botulinum injections to either an educational control with Tylenol use permitted or intra-articular saline injection<sup>[2,3,4]</sup>. One study also provided therapeutic exercise to patients in all groups.<sup>[4]</sup> The study by Hsieh et al.<sup>[1]</sup> was not blinded and had a small number of patients (n=41) but did show a small difference in pain VAS scores favoring intra-articular botulinum injections compared to education control. Bao et al. also showed a between-group difference in VAS pain favoring botulinum plus exercise over saline plus exercise, as well as improvements in WOMAC pain and function<sup>[4]</sup> (Table 1). However, the RCTs by Nielsen<sup>[2]</sup> and McAlindon<sup>[3]</sup> did not find a between-group difference for WOMAC or VAS pain scores. While McAlindon found no significant between-group difference in serious adverse events, Nielsen found a significantly higher number of serious adverse events in the botulinum group (11 vs 0) (Table 2).

Quality of evidence across all critical outcomes: Very low

| <b>Table 1. Intra-articular Botulinum Compared to Control for Osteoarthritis</b> |                      |                      |                      |                      |                         |                                      |                            |                    |                                 |                                     |                                                                                |
|----------------------------------------------------------------------------------|----------------------|----------------------|----------------------|----------------------|-------------------------|--------------------------------------|----------------------------|--------------------|---------------------------------|-------------------------------------|--------------------------------------------------------------------------------|
| <b>Certainty assessment</b>                                                      |                      |                      |                      |                      |                         |                                      | <b>Summary of findings</b> |                    |                                 |                                     |                                                                                |
| <b>Nº of participants (studies) Follow-up</b>                                    | <b>Risk of bias</b>  | <b>Inconsistency</b> | <b>Indirectness</b>  | <b>Imprecision</b>   | <b>Publication bias</b> | <b>Overall certainty of evidence</b> | <b>Number of patients</b>  |                    | <b>Relative effect (95% CI)</b> | <b>Anticipated absolute effects</b> |                                                                                |
|                                                                                  |                      |                      |                      |                      |                         |                                      | <b>With control</b>        | <b>With IA Bot</b> |                                 | <b>Risk with control</b>            | <b>Risk difference with IA Bot</b>                                             |
| <b>Pain VAS (0-10, lower scores indicate improvement)</b>                        |                      |                      |                      |                      |                         |                                      |                            |                    |                                 |                                     |                                                                                |
| 81 (2 RCTs)                                                                      | serious <sup>a</sup> | not serious          | serious <sup>b</sup> | serious <sup>c</sup> | none                    | ⊕○○○<br>○<br>VERY LOW                | 40                         | 41                 | -                               | -                                   | MD <b>1.94 lower</b> (2.37 lower to 1.51 lower)<br><br><b>Favors botulinum</b> |

| <b>Table 1. Intra-articular Botulinum Compared to Control for Osteoarthritis</b> |                      |             |                      |                      |      |                            |    |    |   |   |                                                                                                   |
|----------------------------------------------------------------------------------|----------------------|-------------|----------------------|----------------------|------|----------------------------|----|----|---|---|---------------------------------------------------------------------------------------------------|
| <b>Certainty assessment</b>                                                      |                      |             |                      |                      |      | <b>Summary of findings</b> |    |    |   |   |                                                                                                   |
| <b>WOMAC Pain (0-100, lower scores indicate improvement)</b>                     |                      |             |                      |                      |      |                            |    |    |   |   |                                                                                                   |
| 40<br>(1 RCT)                                                                    | serious <sup>d</sup> | not serious | serious <sup>b</sup> | serious <sup>c</sup> | none | ⊕○○<br>○<br>VERY<br>LOW    | 20 | 20 | - | - | <b>MD 30.30<br/>lower</b><br>(33 lower to<br>27.60<br>lower)<br><br><b>Favors<br/>botulinum</b>   |
| <b>WOMAC Function (0-100, lower scores indicate improvement)</b>                 |                      |             |                      |                      |      |                            |    |    |   |   |                                                                                                   |
| 40<br>(1 RCT)                                                                    | serious <sup>d</sup> | not serious | serious <sup>b</sup> | serious <sup>c</sup> | none | ⊕○○<br>○<br>VERY<br>LOW    | 20 | 20 | - | - | <b>MD 11.20<br/>lower</b><br>(13.48<br>lower to<br>8.92 lower)<br><br><b>Favors<br/>botulinum</b> |

**CI:** Confidence interval; **MD:** Mean difference

## Explanations

- Patient blinded; personnel and observer not blinded.
- IA Botulinum vs education control, IA bot vs saline control with both groups receiving exercise. Tylenol use permitted; NSAIDs not mentioned.
- Small number of patients, findings not supported by studies in Table 2.

**Table 2. RCT data not suitable for effect size calculation or combining with other data**

| Ref ID, Author, year      | Study type | Duration | Population Description                                                                                                                                                                                                                                                                                                                                         | Treatment given to relevant population                                                                              | Results                                                                                                                                                                                                                          |
|---------------------------|------------|----------|----------------------------------------------------------------------------------------------------------------------------------------------------------------------------------------------------------------------------------------------------------------------------------------------------------------------------------------------------------------|---------------------------------------------------------------------------------------------------------------------|----------------------------------------------------------------------------------------------------------------------------------------------------------------------------------------------------------------------------------|
| 9028<br>McAlindon 2018    | RCT        | 8 weeks  | Patients (N = 176) with chronic idiopathic knee OA                                                                                                                                                                                                                                                                                                             | intra-articular onabotA 400 U or 200 U or saline placebo.                                                           | <b>VAS daily pain score</b> (between-group difference): 0.22, 95% CI -0.33 to 0.76, p=0.437.<br><b>WOMAC pain</b> (between-group difference): 0.0 (95% CI -0.61 to 0.59, p=0.979).<br><b>Serious AEs:</b> onabotA 9 vs placebo 6 |
| 4754,<br>Nielsen,<br>2017 | RCT        | 12 weeks | Patients (N = 121) with idiopathic knee OA according to American College of Rheumatology (ACR) modified clinical classification criteria verified radiographically as Kellgren–Lawrence (K&L) grade I to III. Bot group (n=61) 62.5 yrs (8.6); placebo group (n=60) 62.1 yrs (8.6). *Population was subgrouped (nociceptive, neuropathic, and mixed/uncertain) | Randomized to receive onabotA US-guided IA injection (200 units)(n = 61) or placebo (2 mL of 0.9% saline )(n = 60). | "No significant between-group difference was demonstrated for any of the clinical data analysed." Values (or graph) for WOMAC or pain VAS not reported in article.                                                               |

## References

1. Hsieh LF, Wu CW, Chou CC, Yang SW, Wu SH, Lin YJ, et al. Effects of Botulinum Toxin Landmark-Guided Intra-articular Injection in Subjects With Knee Osteoarthritis. *PM R*. 2016;8(12):1127-1135.
2. Arendt-Nielsen L, Jiang GL, DeGryse R, Turkel CC. Intra-articular onabotulinumtoxinA in osteoarthritis knee pain: effect on human mechanistic pain biomarkers and clinical pain. *Scand J Rheumatol*. 2017;46(4):303-316.
3. McAlindon TE, Schmidt U, Bugarin D, Abrams S, Geib T, DeGryse RE, et al. Efficacy and safety of single-dose onabotulinumtoxinA in the treatment of symptoms of osteoarthritis of the knee: results of a placebo-controlled, double-blind study. *Osteoarthritis Cartilage*. 2018 Oct;26(10):1291-1299.
4. Bao X, Tan JW, Flyzik M, Ma XC, Liu H, Liu HY. Effect of therapeutic exercise on knee osteoarthritis after intra-articular injection of botulinum toxin type A, hyaluronate or saline: A randomized controlled trial. *J Rehabil Med*. 2018 Jun 15;50(6):534-541

**PICO 46: Intra-articular corticosteroids compared to intra-articular saline for knee or hip OA**

**Summary:** The literature search identified nine RCTs that directly addressed this comparison.<sup>[1-9]</sup> Three RCTs addressed this question for patients with hip OA (Tables 1 and 2).<sup>[1-3]</sup> The study by Lambert et al.<sup>[1]</sup> was an RCT with a small number of participants and the only study with data suitable for RevMan (Table 1). Lambert et al.<sup>[1]</sup> found lower WOMAC pain and function scores at one and two months status post intra-articular corticosteroid injections compared to saline control. Likewise, the study by Atachia et al.<sup>[2]</sup> found significant reductions in WOMAC pain and function compared to saline at week eight s/p injection. Qvistgaard et al.<sup>[3]</sup> found improvements in pain VAS on walking for corticosteroid injections compared to saline injections after 14 and 28 days; effects were no longer seen at three months (Table 2).

Six RCTs addressed this comparison in patients with knee OA (Table 3).<sup>[4-9]</sup> McAlindon et al. and Raynauld et al.<sup>[4,6]</sup> found no significant between-group difference in WOMAC pain at two years. Conflicting results were noted on a shorter time schedule (3 weeks and 6 weeks s/p injections) by Jones et al.<sup>[7]</sup> and Gaffney et al.<sup>[9]</sup> in which mean pain VAS scores were lower for corticosteroid injections compared to saline injections. However, these findings were inconclusive due to wide CIs that crossed the line of no effect. At 12 weeks<sup>[8]</sup> and 24 weeks<sup>[6]</sup> s/p injection, various corticosteroids (triamcinolone, betamethasone, methylprednisolone, cortivazol) were associated with lower mean pain VAS scores, although the finding was imprecise at 24 weeks. There were no significant differences between groups in WOMAC function or the chair stand test for knee function.

Quality of evidence across all critical outcomes: Low

| <b>Table 1. Intra-articular corticosteroid compared to saline for patients with (hip) osteoarthritis</b> |                     |                      |                     |                      |                         |                                      |                            |                               |                                 |                                     |                                                                                     |
|----------------------------------------------------------------------------------------------------------|---------------------|----------------------|---------------------|----------------------|-------------------------|--------------------------------------|----------------------------|-------------------------------|---------------------------------|-------------------------------------|-------------------------------------------------------------------------------------|
| <b>Certainty assessment</b>                                                                              |                     |                      |                     |                      |                         |                                      | <b>Summary of findings</b> |                               |                                 |                                     |                                                                                     |
| <b>Nº of participants (studies) Follow-up</b>                                                            | <b>Risk of bias</b> | <b>Inconsistency</b> | <b>Indirectness</b> | <b>Imprecision</b>   | <b>Publication bias</b> | <b>Overall certainty of evidence</b> | <b>Number of patients</b>  |                               | <b>Relative effect (95% CI)</b> | <b>Anticipated absolute effects</b> |                                                                                     |
|                                                                                                          |                     |                      |                     |                      |                         |                                      | <b>With saline (hip)</b>   | <b>With IA corticosteroid</b> |                                 | <b>Risk with saline (hip)</b>       | <b>Risk difference with IA corticosteroid</b>                                       |
| <b>WOMAC pain- 1 mo (0-500, lower scores indicate improvement)</b>                                       |                     |                      |                     |                      |                         |                                      |                            |                               |                                 |                                     |                                                                                     |
| 52 (1 RCT)                                                                                               | not serious         | not serious          | not serious         | serious <sup>a</sup> | none                    | ⊕⊕⊕○<br>MODERATE                     | 21                         | 31                            | -                               | -                                   | MD <b>126.8 lower</b><br>(194.82 lower to 58.78 lower)<br><br><b>Favors steroid</b> |

| <b>Table 1. Intra-articular corticosteroid compared to saline for patients with (hip) osteoarthritis</b> |             |             |             |                      |      |                  |                            |    |   |   |                                                                                      |
|----------------------------------------------------------------------------------------------------------|-------------|-------------|-------------|----------------------|------|------------------|----------------------------|----|---|---|--------------------------------------------------------------------------------------|
| <b>Certainty assessment</b>                                                                              |             |             |             |                      |      |                  | <b>Summary of findings</b> |    |   |   |                                                                                      |
| <b>WOMAC pain- 2 mo (0-500, lower scores indicate improvement)</b>                                       |             |             |             |                      |      |                  |                            |    |   |   |                                                                                      |
| 52<br>(1 RCT)                                                                                            | not serious | not serious | not serious | serious <sup>a</sup> | none | ⊕⊕⊕○<br>MODERATE | 21                         | 31 | - | - | MD <b>149.1 lower</b><br>(217.6 lower to 80.6 lower)<br><br><b>Favors steroid</b>    |
| <b>WOMAC function- 1 mo (0-1700, lower scores indicate improvement)</b>                                  |             |             |             |                      |      |                  |                            |    |   |   |                                                                                      |
| 52<br>(1 RCT)                                                                                            | not serious | not serious | not serious | serious <sup>a</sup> | none | ⊕⊕⊕○<br>MODERATE | 21                         | 31 | - | - | MD <b>381.4 lower</b><br>(590.24 lower to 172.56 lower)<br><br><b>Favors steroid</b> |
| <b>WOMAC function- 2 mo (0-1500, lower scores indicate improvement)</b>                                  |             |             |             |                      |      |                  |                            |    |   |   |                                                                                      |
| 52<br>(1 RCT)                                                                                            | not serious | not serious | not serious | serious <sup>a</sup> | none | ⊕⊕⊕○<br>MODERATE | 21                         | 31 | - | - | MD <b>410.6 lower</b><br>(616.72 lower to 204.48 lower)<br><br><b>Favors steroid</b> |

**CI:** Confidence interval; **MD:** Mean difference

## Explanations



a. Single study with small number of patients

**Table 2. RCT data not suitable for effect size calculation or combining with other data**

| Ref ID, Author, year | Study type | Duration | Population Description                                                                                                       | Treatment given to relevant population                                                                                                                                                                          | Results                                                                                                                                                                                                                                                                                                                                                                                                                                                                                                                                                                                                                                                                                                                                                                                                                                                                                                                                                                                                                                                                                                                                                                                             |
|----------------------|------------|----------|------------------------------------------------------------------------------------------------------------------------------|-----------------------------------------------------------------------------------------------------------------------------------------------------------------------------------------------------------------|-----------------------------------------------------------------------------------------------------------------------------------------------------------------------------------------------------------------------------------------------------------------------------------------------------------------------------------------------------------------------------------------------------------------------------------------------------------------------------------------------------------------------------------------------------------------------------------------------------------------------------------------------------------------------------------------------------------------------------------------------------------------------------------------------------------------------------------------------------------------------------------------------------------------------------------------------------------------------------------------------------------------------------------------------------------------------------------------------------------------------------------------------------------------------------------------------------|
| 3320, Atachia, 2010  | RCT        | 16 weeks | Patients with primary hip osteoarthritis. HA group (n=18, 7 males) 69 yrs ± 9; placebo (saline) (n=18, 7 males ) 70 yrs ± 10 | standard care (non-injection group); normal saline (3 ml); non-animal stabilised hyaluronic acid (durolane, 3 ml/60 mg licensed for single injection) or methylprednisolone acetate (depomedrone, 3 ml/120 mg). | <p><u>Estimated from graph:</u><br/> WOMAC function at 56 days<br/> Saline= 7<br/> Steroid= 5<br/> HA=6<br/> No-injection= 6.5<br/> (p=0.04)</p> <p>WOMAC pain at 56 days<br/> saline= 6.5<br/> Steroid=5<br/> HA=5.5<br/> No-injection= 6.0<br/> P=0.06</p> <p>The effect size (calculated as the mean change from baseline divided by the baseline SD) of the benefit from corticosteroid was large, becoming moderate by week 8: 1.5, 1.0 and 0.5 for NRS pain; 1.9, 1.1 and 0.6 for WOMAC pain; and 1.3, 0.9 and 0.4 for WOMAC function, at weeks 1, 4 and 8, respectively. There was a non-significant trend for improvement with saline injection at week 1 (effect size of 0.44 and 0.41 for NRS pain and WOMAC pain, respectively), which was not apparent at later assessments.</p> <p>Adverse events: There was one confirmed case of post-arthroplasty infection (durolane group). Four patients in the durolane group had significant flare of symptoms within a few days of the injection. In one case septic arthritis had to be excluded and a diagnostic aspiration was performed at week 1, which excluded infection. The symptoms settled within a few days of the aspiration</p> |

| Ref ID, Author, year   | Study type | Duration | Population Description                                                                                                                                                                                                                   | Treatment given to relevant population                                                                                                                                                                                                                                                                                 | Results                                                                                                                                                                                                                                                                                                                                                                                                                                                                                                                                                                                  |
|------------------------|------------|----------|------------------------------------------------------------------------------------------------------------------------------------------------------------------------------------------------------------------------------------------|------------------------------------------------------------------------------------------------------------------------------------------------------------------------------------------------------------------------------------------------------------------------------------------------------------------------|------------------------------------------------------------------------------------------------------------------------------------------------------------------------------------------------------------------------------------------------------------------------------------------------------------------------------------------------------------------------------------------------------------------------------------------------------------------------------------------------------------------------------------------------------------------------------------------|
| 4774, Qvistgaard, 2006 | RCT        | 90 days  | Hip OA as defined by the ACR criteria, radiographic changes of hip OA30, age above 18 years, stable medication for at least 3 weeks before inclusion. HA group (n=33, 61% females) 65 yrs (14), Control (n=36, 61% females) 64 yrs (11). | Patients were randomized to (1) one injection with 1 mL (40 mg Depo-medrol) methylprednisolone corticosteroid followed by two sham injections, (2) three injections of 2 mL HA (Hyalgan), or (3) three intra-articular injections of 2 mL saline water. Secondary outcome measures were WOMAC total scale and PGA VAS. | Estimated from graph:<br>Pain on walking (VAS) at 90 days<br>Corticosteroids: 37 mm<br>Saline (control): 41 mm<br><br>"there was a significant treatment effect across all time-points (P Z 0.044), due to a significant improvement following corticosteroid compared to saline, SMD Steroid Z 0.6 (95% CI: 0.1e1.1, P Z 0.021) whereas HA compared to saline was SMDHA Z 0.4 (0.1 to 0.9; P Z 0.13). The difference between placebo (saline) and corticosteroid was significant at 14 and 28 days but vanished after 3 months (P14 days Z 0.006; P28 days Z 0.006; P3 months Z 0.58)." |

**Table 3. Intra-articular corticosteroid compared to saline (knee) for Osteoarthritis**

| Certainty assessment                                           |              |               |              |             |                  |                               | Summary of findings |                        |                          |                              |                                        |
|----------------------------------------------------------------|--------------|---------------|--------------|-------------|------------------|-------------------------------|---------------------|------------------------|--------------------------|------------------------------|----------------------------------------|
| No of participants (studies) Follow-up                         | Risk of bias | Inconsistency | Indirectness | Imprecision | Publication bias | Overall certainty of evidence | Number of patients  |                        | Relative effect (95% CI) | Anticipated absolute effects |                                        |
|                                                                |              |               |              |             |                  |                               | With saline (knee)  | With IA corticosteroid |                          | Risk with saline (knee)      | Risk difference with IA corticosteroid |
| <b>WOMAC pain- 2 years (lower scores indicate improvement)</b> |              |               |              |             |                  |                               |                     |                        |                          |                              |                                        |

**Table 3. Intra-articular corticosteroid compared to saline (knee) for Osteoarthritis**

| Certainty assessment                                                               |                           |             |             |                      |      |              | Summary of findings |     |   |   |                                                                                |
|------------------------------------------------------------------------------------|---------------------------|-------------|-------------|----------------------|------|--------------|---------------------|-----|---|---|--------------------------------------------------------------------------------|
| 206<br>(2 RCTs)                                                                    | not serious               | not serious | not serious | not serious          | none | ⊕⊕⊕⊕<br>HIGH | 103                 | 103 | - | - | SMD <b>0.21 higher</b><br>(0.06 lower to 0.49 higher)                          |
| <b>Pain VAS at 3 weeks (0-100, lower scores indicate improvement)</b>              |                           |             |             |                      |      |              |                     |     |   |   |                                                                                |
| 59<br>(1 RCT)                                                                      | serious <sup>b</sup>      | not serious | not serious | serious <sup>c</sup> | none | ⊕⊕○○<br>LOW  | 29                  | 30  | - | - | MD <b>4.75 lower</b><br>(16.89 lower to 7.39 higher)                           |
| <b>Pain VAS- 6 weeks (0-100, lower scores indicate improvement)</b>                |                           |             |             |                      |      |              |                     |     |   |   |                                                                                |
| 84<br>(1 RCT)                                                                      | serious <sup>e</sup>      | not serious | not serious | serious <sup>c</sup> | none | ⊕⊕○○<br>LOW  | 42                  | 42  | - | - | MD <b>7.1 lower</b><br>(18.39 lower to 4.19 higher)                            |
| <b>Pain VAS 12 weeks – Triamcinolone (0-10, lower scores indicate improvement)</b> |                           |             |             |                      |      |              |                     |     |   |   |                                                                                |
| 60<br>(1 RCT)                                                                      | very serious <sup>d</sup> | not serious | not serious | not serious          | none | ⊕⊕○○<br>LOW  | 30                  | 30  | - | - | MD <b>1.7 lower</b><br>(2.51 lower to 0.89 lower)<br><br><b>Favors steroid</b> |
| <b>Pain VAS 12 weeks – Betamethasone (0-10, lower scores indicate improvement)</b> |                           |             |             |                      |      |              |                     |     |   |   |                                                                                |

**Table 3. Intra-articular corticosteroid compared to saline (knee) for Osteoarthritis**

| Certainty assessment                                                                    |                           |             |             |                      |      | Summary of findings |     |     |   |   |                                                                                |
|-----------------------------------------------------------------------------------------|---------------------------|-------------|-------------|----------------------|------|---------------------|-----|-----|---|---|--------------------------------------------------------------------------------|
| 60<br>(1 RCT)                                                                           | very serious <sup>d</sup> | not serious | not serious | not serious          | none | ⊕⊕○○<br>LOW         | 30  | 30  | - | - | MD <b>1.8 lower</b><br>(2.54 lower to 1.06 lower)<br><br><b>Favors steroid</b> |
| <b>Pain VAS 12 weeks – Methylprednisolone (0-10, lower scores indicate improvement)</b> |                           |             |             |                      |      |                     |     |     |   |   |                                                                                |
| 60<br>(1 RCT)                                                                           | very serious <sup>d</sup> | not serious | not serious | not serious          | none | ⊕⊕○○<br>LOW         | 30  | 30  | - | - | MD <b>2.4 lower</b><br>(3.17 lower to 1.63 lower)<br><br><b>Favors steroid</b> |
| <b>Pain VAS- 24 weeks, Cortivazol (0-100, lower scores indicate improvement)</b>        |                           |             |             |                      |      |                     |     |     |   |   |                                                                                |
| 53<br>(1 RCT)                                                                           | serious <sup>a</sup>      | not serious | not serious | serious <sup>c</sup> | none | ⊕⊕○○<br>LOW         | 28  | 25  | - | - | MD <b>7 lower</b><br>(22.44 lower to 8.44 higher)                              |
| <b>WOMAC function- 2 years (lower scores indicate improvement)</b>                      |                           |             |             |                      |      |                     |     |     |   |   |                                                                                |
| 206<br>(2 RCTs)                                                                         | not serious               | not serious | not serious | not serious          | none | ⊕⊕⊕⊕<br>HIGH        | 103 | 103 | - | - | SMD <b>0.07 higher</b><br>(0.20 lower to 0.35 higher)                          |
| <b>Chair Stand (higher scores indicate improvement)</b>                                 |                           |             |             |                      |      |                     |     |     |   |   |                                                                                |

**Table 3. Intra-articular corticosteroid compared to saline (knee) for Osteoarthritis**

| Certainty assessment |             |             |             |             |      |              | Summary of findings |    |   |   |                                                   |
|----------------------|-------------|-------------|-------------|-------------|------|--------------|---------------------|----|---|---|---------------------------------------------------|
| 140<br>(1 RCT)       | not serious | not serious | not serious | not serious | none | ⊕⊕⊕⊕<br>HIGH | 70                  | 70 | - | - | MD <b>0.1 higher</b><br>(3.1 lower to 3.3 higher) |

**CI:** Confidence interval; **MD:** Mean difference

### Explanations

- a. unclear allocation concealment, unclear attrition
- b. unclear sequence generation, allocation concealment, reporting bias
- c. wide 95% confidence interval that crosses line of no effect
- d. unclear sequence generation, concealment, unblinded, unclear attrition, reporting bias
- e. unclear sequence generation, allocation concealment, attrition bias

### References

1. Lambert RG, Hutchings EJ, Grace MG, Jhangri GS, Conner-Spady B, Maksymowych WP. Steroid injection for osteoarthritis of the hip: a randomized, double-blind, placebo-controlled trial. *Arthritis Rheum.* 2007;56(7):2278-2287.
2. Atchia I, Kane D, Reed MR, Isaacs JD, Birrell F. Efficacy of a single ultrasound-guided injection for the treatment of hip osteoarthritis. *Ann Rheum Dis.* 2011;70(1):110-116.
3. Qvistgaard E, Christensen R, Torp-Pedersen S, Bliddal H. Intra-articular treatment of hip osteoarthritis: a randomized trial of hyaluronic acid, corticosteroid, and isotonic saline. *Osteoarthritis Cartilage.* 2006;14(2):163-170.
4. McAlindon TE, LaValley MP, Harvey WF, Price LL, Driban JB, Zhang M, et al. Effect of Intra-articular Triamcinolone vs Saline on Knee Cartilage Volume and Pain in Patients With Knee Osteoarthritis: A Randomized Clinical Trial. *JAMA.* 2017;317(19):1967-1975.
5. Raynauld JP, Buckland-Wright C, Ward R, Choquette D, Haraoui B, Martel-Pelletier J, et al. Safety and efficacy of long-term intraarticular steroid injections in osteoarthritis of the knee: a randomized, double-blind, placebo-controlled trial. *Arthritis Rheum.* 2003;48(2):370-377.
6. Ravaud P, Moulinier L, Giraudeau B, Ayral X, Guerin C, Noel E, et al. Effects of joint lavage and steroid injection in patients with osteoarthritis of the knee: results of a multicenter, randomized, controlled trial. *Arthritis Rheum.* 1999;42(3):475-482.

7. Jones A, Doherty M. Intra-articular corticosteroids are effective in osteoarthritis but there are no clinical predictors of response. *Ann Rheum Dis.* 1996;55(11):829-832.
8. Yavuz U, Sokucu S, Albayrak A, Ozturk K. Efficacy comparisons of the intraarticular steroidal agents in the patients with knee osteoarthritis. *Rheumatol Int.* 2012;32(11):3391-3396.
9. Gaffney K, Ledingham J, Perry JD. Intra-articular triamcinolone hexacetonide in knee osteoarthritis: factors influencing the clinical response. *Ann Rheum Dis.* 1995;54(5):379-381.

#### **PICO 47: Intra-articular hyaluronic acid compared to intra-articular corticosteroids for knee or hip OA**

Summary: Knee: The literature search identified 16 randomized controlled trials<sup>[1-16]</sup> that addressed this PICO question. The RCTs provided direct evidence by comparing intra-articular hyaluronic acid compared to intra-articular corticosteroid injections for osteoarthritis. Of note, the studies by Tascioglu et al.<sup>[1]</sup> and Shimizu et al.<sup>[12]</sup> were unblinded, open label studies of three weekly or five weekly injections of hyaluronic acid, respectively. Intra-articular hyaluronic acid compared to intra-articular corticosteroids had significantly lower WOMAC pain scores at three and six months for a series of three injections,<sup>[10]</sup> although the difference was small and not clinically significant. A meta-analysis of 8 RCTs found that corticosteroids led to significantly greater global pain VAS improvement than HA at one month<sup>[1,4,5,8,12,16]</sup>, but the difference was not clinically significant. No significant between-group difference in VAS pain was found at 3 months<sup>[1-5,8,10,11]</sup>. At 6 months, a small but statistically significant-between-group difference favored HA<sup>[1,3,5,8,10,12,16]</sup>, but the difference was not clinically significant. These findings did not change when studies with open label or unclear blinding were removed from the analyses. There was no between group difference in WOMAC function scores at 3 months<sup>[4]</sup> or 6 months<sup>[8,9]</sup>. There was no significant between-group difference in adverse events; however, a higher proportion of patients receiving intra-articular corticosteroids developed secondary adrenal insufficiency compared to hyaluronic acid<sup>[15]</sup>. A literature search update in August 2018 identified one additional relevant RCT in patients with knee OA<sup>[17]</sup>. This study's data did not alter the findings of Table 1 below.

Hip: Atchia et al.<sup>[13]</sup> found slightly lower mean (hip) WOMAC pain and function scores at 56 days with corticosteroid injections compared to hyaluronic acid at 56 days; data was insufficient to include in meta-analysis. Qvistgaard et al.<sup>[14]</sup> did not find any between group differences in (hip) pain VAS on walking at 90 days.

Quality of evidence across all critical outcomes: Moderate

**Table 1. Intra-articular Hyaluronic Acid compared to Intra-articular Corticosteroid for Knee OA**

| Certainty assessment                                                                    |                      |               |              |             |                  |                               | Summary of findings    |            |                          |                              |                                                                       |
|-----------------------------------------------------------------------------------------|----------------------|---------------|--------------|-------------|------------------|-------------------------------|------------------------|------------|--------------------------|------------------------------|-----------------------------------------------------------------------|
| № of participants (studies) Follow-up                                                   | Risk of bias         | Inconsistency | Indirectness | Imprecision | Publication bias | Overall certainty of evidence | Number of patients     |            | Relative effect (95% CI) | Anticipated absolute effects |                                                                       |
|                                                                                         |                      |               |              |             |                  |                               | With IA steroid (knee) | With IA HA |                          | Risk with IA steroid (knee)  | Risk difference with IA HA                                            |
| <b>WOMAC Pain- 3 months (0-20, lower scores indicate improvement)</b>                   |                      |               |              |             |                  |                               |                        |            |                          |                              |                                                                       |
| 356 (2 RCTs)                                                                            | serious <sup>a</sup> | not serious   | not serious  | not serious | none             | ⊕⊕⊕○<br>MODERATE              | 172                    | 184        | -                        | -                            | MD <b>0.19 lower</b><br>(0.94 lower to 0.56 higher)                   |
| <b>WOMAC Pain- 3 months - 1 HA injection (0-20, lower scores indicate improvement)</b>  |                      |               |              |             |                  |                               |                        |            |                          |                              |                                                                       |
| 140 (1 RCT)                                                                             | not serious          | not serious   | not serious  | not serious | none             | ⊕⊕⊕⊕<br>HIGH                  | 69                     | 71         | -                        | -                            | MD <b>0.51 higher</b><br>(0.81 lower to 1.83 higher)                  |
| <b>WOMAC Pain- 3 months - 3 HA injections (0-20, lower scores indicate improvement)</b> |                      |               |              |             |                  |                               |                        |            |                          |                              |                                                                       |
| 216 (1 RCT)                                                                             | serious <sup>b</sup> | not serious   | not serious  | not serious | none             | ⊕⊕⊕○<br>MODERATE              | 103                    | 113        | -                        | -                            | MD <b>0.4 lower</b><br>(0.43 lower to 0.37 lower)<br><b>Favors HA</b> |
| <b>WOMAC Pain- 6 months (0-20, lower scores indicate improvement)</b>                   |                      |               |              |             |                  |                               |                        |            |                          |                              |                                                                       |

| <b>Table 1. Intra-articular Hyaluronic Acid compared to Intra-articular Corticosteroid for Knee OA</b> |                      |             |             |             |      |                  |                            |     |   |   |                                                                                            |
|--------------------------------------------------------------------------------------------------------|----------------------|-------------|-------------|-------------|------|------------------|----------------------------|-----|---|---|--------------------------------------------------------------------------------------------|
| <b>Certainty assessment</b>                                                                            |                      |             |             |             |      |                  | <b>Summary of findings</b> |     |   |   |                                                                                            |
| 216<br>(1 RCT)                                                                                         | serious <sup>b</sup> | not serious | not serious | not serious | none | ⊕⊕⊕○<br>MODERATE | 103                        | 113 | - | - | MD <b>1.1 lower</b><br>(1.13 lower to 1.07 lower)<br><br><b>Favors HA</b>                  |
| <b>Pain VAS – 1 month (0-10, lower scores indicate improvement)</b>                                    |                      |             |             |             |      |                  |                            |     |   |   |                                                                                            |
| 484<br>(6 RCTs)                                                                                        | serious <sup>d</sup> | not serious | not serious | not serious | none | ⊕⊕⊕○<br>MODERATE | 250                        | 234 | - | - | MD <b>0.67 higher</b><br>(0.07 higher to 1,27 higher)<br><br><b>Favors corticosteroids</b> |
| <b>Pain VAS – 3 months (0-10, lower scores indicate improvement)</b>                                   |                      |             |             |             |      |                  |                            |     |   |   |                                                                                            |
| 800<br>(8 RCTs)                                                                                        | serious <sup>d</sup> | not serious | not serious | not serious | none | ⊕⊕⊕○<br>MODERATE | 410                        | 390 | - | - | MD <b>0.46 lower</b><br>(1.31 lower to 0.39 higher)                                        |
| <b>Pain VAS- 6 months (0-10, lower scores indicate improvement)</b>                                    |                      |             |             |             |      |                  |                            |     |   |   |                                                                                            |
| 646<br>(7 RCTs)                                                                                        | serious <sup>f</sup> | serious     | not serious | not serious | none | ⊕⊕⊕○<br>MODERATE | 339                        | 307 | - | - | MD <b>0.73 lower</b><br>(1.25 lower to 0.21 lower)<br><br><b>Favors HA</b>                 |
| <b>WOMAC Function- 3 months (0-20, lower scores indicate improvement)</b>                              |                      |             |             |             |      |                  |                            |     |   |   |                                                                                            |



| <b>Table 1. Intra-articular Hyaluronic Acid compared to Intra-articular Corticosteroid for Knee OA</b> |             |             |             |                      |      |                  |                            |                  |                                  |              |                                                      |
|--------------------------------------------------------------------------------------------------------|-------------|-------------|-------------|----------------------|------|------------------|----------------------------|------------------|----------------------------------|--------------|------------------------------------------------------|
| <b>Certainty assessment</b>                                                                            |             |             |             |                      |      |                  | <b>Summary of findings</b> |                  |                                  |              |                                                      |
| 140<br>(1 RCT)                                                                                         | not serious | not serious | not serious | not serious          | none | ⊕⊕⊕⊕<br>HIGH     | 69                         | 71               | -                                | -            | MD <b>0.25 higher</b><br>(3.69 lower to 4.19 higher) |
| <b>WOMAC function 6 months (0-20, lower scores indicate improvement)</b>                               |             |             |             |                      |      |                  |                            |                  |                                  |              |                                                      |
| 541<br>(2 RCTs)                                                                                        | not serious | not serious | not serious | not serious          | none | ⊕⊕⊕⊕<br>HIGH     | 270                        | 271              | -                                | -            | MD <b>1.34 lower</b><br>(2.7 lower to 0.01 higher)   |
| <b>Total Adverse Events</b>                                                                            |             |             |             |                      |      |                  |                            |                  |                                  |              |                                                      |
| 521<br>(1 RCT)                                                                                         | not serious | not serious | not serious | serious <sup>e</sup> | none | ⊕⊕⊕○<br>MODERATE | 16/262<br>(6.1%)           | 10/259<br>(3.9%) | <b>OR 0.62</b><br>(0.28 to 1.39) | 61 per 1,000 | <b>22 fewer per 1,000</b><br>(43 fewer to 22 more)   |

**CI:** Confidence interval; **MD:** Mean difference; **OR:** Odds ratio

## Explanations

- several categories of unclear risk of bias; Caborn 6796 had unblinded participants and injectors
- Caborn 6796 had unblinded participants and injectors
- Several categories of unclear risk of bias. Bisicchia 4233 had unblinded injectors and patients.
- I2 >75%. Bisicchia 4233 favored IA HA, Skwara 789 & Skwara 3994 favored IA steroid.
- Wide 95% confidence interval that overlaps line of no effect.
- Several categories of unclear risk of bias. Bisicchia 4233 had unblinded injectors and patients; Shimizu 855 was completely unblinded
- Tascioglu 3400 unblinded

**Table 2. RCT data not suitable for effect size calculation or combining with other data**

| Ref ID, Author, year   | Study type | Duration | Population Description                                                                                                      | Treatment given to relevant population                                                                                                                                                                          | Results                                                                                                                                                                                                                                                                                                                                                                                                                                                                                                                                                                                                                                                                                                                                                                                                                                                                                                                                                                                                                                                                                                                                                                                                          |
|------------------------|------------|----------|-----------------------------------------------------------------------------------------------------------------------------|-----------------------------------------------------------------------------------------------------------------------------------------------------------------------------------------------------------------|------------------------------------------------------------------------------------------------------------------------------------------------------------------------------------------------------------------------------------------------------------------------------------------------------------------------------------------------------------------------------------------------------------------------------------------------------------------------------------------------------------------------------------------------------------------------------------------------------------------------------------------------------------------------------------------------------------------------------------------------------------------------------------------------------------------------------------------------------------------------------------------------------------------------------------------------------------------------------------------------------------------------------------------------------------------------------------------------------------------------------------------------------------------------------------------------------------------|
| <b>HIP</b>             |            |          |                                                                                                                             |                                                                                                                                                                                                                 |                                                                                                                                                                                                                                                                                                                                                                                                                                                                                                                                                                                                                                                                                                                                                                                                                                                                                                                                                                                                                                                                                                                                                                                                                  |
| 3320, Atachia, 2010    | RCT        | 16 weeks | Patients with primary hip osteoarthritis. HA group (n=18, 7 males) 69 yrs ± 9; placebo (saline) (n=18, 7 males) 70 yrs ± 10 | Standard care (non-injection group); normal saline (3 ml); non-animal stabilised hyaluronic acid (durolane, 3 ml/60 mg licensed for single injection) or methylprednisolone acetate (depomedrone, 3 ml/120 mg). | <p><u>Estimated from graph:</u><br/> WOMAC function at 56 days<br/> Control (saline)= 7<br/> Steroid= 5<br/> HA=6<br/> No-injection= 6.5<br/> (p=0.04)</p> <p>WOMAC pain at 56 days<br/> Control (saline)= 6.5<br/> Steroid=5<br/> HA=5.5<br/> No-injection= 6.0<br/> P=0.06</p> <p>The effect size (calculated as the mean change from baseline divided by the baseline SD) of the benefit from corticosteroid was large, becoming moderate by week 8: 1.5, 1.0 and 0.5 for NRS pain; 1.9, 1.1 and 0.6 for WOMAC pain; and 1.3, 0.9 and 0.4 for WOMAC function, at weeks 1, 4 and 8, respectively. There was a non-significant trend for improvement with saline injection at week 1 (effect size of 0.44 and 0.41 for NRS pain and WOMAC pain, respectively), which was not apparent at later assessments.</p> <p>Adverse: There was one confirmed case of post-arthroplasty infection (durolane group). Four patients in the durolane group had significant flare of symptoms within a few days of the injection. In one case septic arthritis had to be excluded and a diagnostic aspiration was performed at week 1, which excluded infection. The symptoms settled within a few days of the aspiration</p> |
| 4774, Qvistgaard, 2006 | RCT        | 90 days  | Hip OA as defined by the ACR criteria <sup>29</sup> , radiographic                                                          | Patients were randomized to (1) one injection with 1 mL (40 mg Depo-                                                                                                                                            | <p>Estimated from graph:<br/> Pain on walking (VAS) at 90 days<br/> Corticosteroids:37 mm<br/> HA group: 37 mm</p>                                                                                                                                                                                                                                                                                                                                                                                                                                                                                                                                                                                                                                                                                                                                                                                                                                                                                                                                                                                                                                                                                               |

| Ref ID, Author, year | Study type | Duration | Population Description                                                                                                                                                                                                               | Treatment given to relevant population                                                                                                                                                                                                             | Results                                                                                                                                                                                                                                                                                                                                                                                                                                                                                            |
|----------------------|------------|----------|--------------------------------------------------------------------------------------------------------------------------------------------------------------------------------------------------------------------------------------|----------------------------------------------------------------------------------------------------------------------------------------------------------------------------------------------------------------------------------------------------|----------------------------------------------------------------------------------------------------------------------------------------------------------------------------------------------------------------------------------------------------------------------------------------------------------------------------------------------------------------------------------------------------------------------------------------------------------------------------------------------------|
|                      |            |          | changes of hip OA30, age above 18 years, stable medication for at least 3 weeks before inclusion. HA group (n=33, 61% females ) 65 yrs (14), Control (n=36, 61% females ) 64 yrs (11).                                               | medrol) methylprednisolone corticosteroid followed by two sham injections, (2) three injections of 2 mL HA (Hyalgan), or (3) three intra-articular injections of 2 mL saline water. Secondary outcome measures were WOMAC total scale and PGA VAS. | Saline (control): 41 mm<br><br>“there was a significant treatment effect across all time-points (P Z 0.044), due to a significant improvement following corticosteroid compared to saline, SMD Steroid Z 0.6 (95% CI: 0.1e1.1, P Z 0.021) whereas HA compared to saline was SMD HA Z 0.4 (0.1 to 0.9; P Z 0.13). The difference between placebo (saline) and corticosteroid was significant at 14 and 28 days but vanished after 3 months (P14 days Z 0.006; P28 days Z 0.006; P3 months Z 0.58).” |
| <b>KNEE</b>          |            |          |                                                                                                                                                                                                                                      |                                                                                                                                                                                                                                                    |                                                                                                                                                                                                                                                                                                                                                                                                                                                                                                    |
| 4705, Vaishya, 2017  | RCT        | 24 weeks | Patients with moderate OA knee, Kellgren–Lawrence (KL) grade II and III were enrolled in the study: 40 patients in steroid (15 males) and 42 patients in HA group (13 males). *Ages not provided.<br><br>40 patients (68 knees) were | IA 40 mg triamcinolone or IA 6 ml of Synvisc. Either one or both knees were injected.*<br><br>**ROB in Revman                                                                                                                                      | Standard deviations or CIs not provided in article.<br><br>For global VAS score<br>After 1 week: Steroid group 1.75 vs HA group 1.87 (p=0.34)<br>After 4 <sup>th</sup> week: : Steroid group 2.07 vs HA group 1.95 (p=0.26)<br><b>After 12 weeks: Steroid group 2.8 vs HA group 2.34 (p&lt;0.01)</b><br><b>After 24 weeks: Steroid group 3.6 vs HA group 3.14 (p=0.03)</b>                                                                                                                         |

| Ref ID, Author, year | Study type | Duration | Population Description                                                                                             | Treatment given to relevant population                                                                                                                                           | Results                                                                                                                                                                                                                                                                                                                                                                                                                                                                                                                                                                                                               |
|----------------------|------------|----------|--------------------------------------------------------------------------------------------------------------------|----------------------------------------------------------------------------------------------------------------------------------------------------------------------------------|-----------------------------------------------------------------------------------------------------------------------------------------------------------------------------------------------------------------------------------------------------------------------------------------------------------------------------------------------------------------------------------------------------------------------------------------------------------------------------------------------------------------------------------------------------------------------------------------------------------------------|
|                      |            |          | included in the steroid group.<br><br>42 patients (72 knees) were included in the HA group.                        |                                                                                                                                                                                  |                                                                                                                                                                                                                                                                                                                                                                                                                                                                                                                                                                                                                       |
| 4751, Habib, 2014    | RCT        | 8 weeks  | 20 patients in HA group were 50.9 yrs±11.8 (15 males). 20 patients in steroid group were 53.3 yrs±13.1 (12 males). | Group 1 patients had an IACI of 80 mg of MPA at the knee joint and group 2 patients had an intra-articular injection (IAI) of 6 ml (60 mg) of sodium hyaluronate (control group) | **Primary goal of study was to evaluate HPA axis. Pain VAS was recorded but not specifically reported- "Eighty-five percent of the patients from group 1 had a favorable clinical response at week 1 vs. 50 % of the patients in group 2 (p =0.018). After that, the results were comparable."<br><br>In the steroid group, 25 % of patients had secondary adrenal insufficiency vs. none in HA group (p = 0.0471). The earliest SAI was observed at week 2, and latest SAI was observed at week 4. SAI was observed at one time point, two consecutive time points, or two separate time points in the same patient. |

## References

1. Tascioglu F, Kuzgun S, Armagan O, Ogutler G. Short-term effectiveness of ultrasound therapy in knee osteoarthritis. J Int Med Res. 2010;38(4):1233-1242.
2. Skwara A, Ponelis R, Tibesku CO, Rosenbaum D, Fuchs-Winkelmann S. Gait patterns after intraarticular treatment of patients with osteoarthritis of the knee--hyaluronan versus triamcinolone: a prospective, randomized, doubleblind, monocentric study. Eur J Med Res. 2009;14(4):157-164.
3. Bisicchia S, Bernardi G, Tudisco C. HYADD 4 versus methylprednisolone acetate in symptomatic knee osteoarthritis: a single-centre single blind prospective randomised controlled clinical study with 1-year follow-up. Clin Exp Rheumatol. 2016;34(5):857-863.
4. Askari A, Gholami T, NaghiZadeh MM, Farjam M, Kouhpayeh SA, Shahabfard Z. Hyaluronic acid compared with corticosteroid injections for the treatment of osteoarthritis of the knee: a randomized control trail. Springerplus. 2016;5:442.

5. Jones AC, Pattrick M, Doherty S, Doherty M. Intra-articular hyaluronic acid compared to intra-articular triamcinolone hexacetonide in inflammatory knee osteoarthritis. *Osteoarthritis Cartilage*. 1995;3(4):269-273.
6. Vaishya R, Pandit R, Agarwal AK, Vijay V. Intra-articular hyaluronic acid is superior to steroids in knee osteoarthritis: A comparative, randomized study. *J Clin Orthop Trauma*. 2017;8(1):85-88.
7. Housman L, Arden N, Schnitzer TJ, Birbara C, Conrozier T, Skrepnik N, et al. Intra-articular hylastan versus steroid for knee osteoarthritis. *Knee Surg Sports Traumatol Arthrosc*. 2014;22(7):1684-1692.
8. Tammachote N, Kanitnate S, Yakumpor T, Panichkul P. Intra-Articular, Single-Shot Hylan G-F 20 Hyaluronic Acid Injection Compared with Corticosteroid in Knee Osteoarthritis: A Double-Blind, Randomized Controlled Trial. *J Bone Joint Surg Am*. 2016;98(11):885-892.
9. Leighton R, Akermark C, Therrien R, Richardson JB, Andersson M, Todman MG, et al. NASHA hyaluronic acid vs. methylprednisolone for knee osteoarthritis: a prospective, multi-centre, randomized, non-inferiority trial. *Osteoarthritis Cartilage*. 2014;22(1):17-25.
10. Caborn D, Rush J, Lanzer W, Parenti D, Murray C, Synvisc 901 Study G. A randomized, single-blind comparison of the efficacy and tolerability of hylan G-F 20 and triamcinolone hexacetonide in patients with osteoarthritis of the knee. *J Rheumatol*. 2004;31(2):333-343.
11. Skwara A, Peterlein CD, Tibesku CO, Rosenbaum D, Fuchs-Winkelmann S. Changes of gait patterns and muscle activity after intraarticular treatment of patients with osteoarthritis of the knee: a prospective, randomised, doubleblind study. *Knee*. 2009;16(6):466-472.
12. Shimizu M, Higuchi H, Takagishi K, Shinozaki T, Kobayashi T. Clinical and biochemical characteristics after intra-articular injection for the treatment of osteoarthritis of the knee: prospective randomized study of sodium hyaluronate and corticosteroid. *J Orthop Sci*. 2010;15(1):51-56.
13. Atchia I, Kane D, Reed MR, Isaacs JD, Birrell F. Efficacy of a single ultrasound-guided injection for the treatment of hip osteoarthritis. *Ann Rheum Dis*. 2011;70(1):110-116.
14. Qvistgaard E, Christensen R, Torp-Pedersen S, Bliddal H. Intra-articular treatment of hip osteoarthritis: a randomized trial of hyaluronic acid, corticosteroid, and isotonic saline. *Osteoarthritis Cartilage*. 2006;14(2):163-170.
15. Habib G, Jabbour A, Artul S, Hakim G. Intra-articular methylprednisolone acetate injection at the knee joint and the hypothalamic-pituitary-adrenal axis: a randomized controlled study. *Clin Rheumatol*. 2014;33(1):99-103.
16. Frizziero L, Ronchetti IP. Intra-articular treatment of osteoarthritis of the knee: An arthroscopic and clinical comparison between sodium hyaluronate (500-730 kDa) and methylprednisolone acetate. *J Orthopaed Traumatol* 2002;3:89-96.
17. Siddharth R, Harleen U. A Prospective, Randomized Trial on Comparative Study of Intra-articular Hyaluronic Acid with Corticosteroid Injections for the Treatment of Osteoarthritis of the Knee Joint. *Indian J Public Health Res Dev*. Apr-Jun2017;8 (2):14-18.

**PICO 48: Intra-articular PRP vs. Intra-articular corticosteroids for OA of the hip / knee**

Summary. This PICO was addressed by 2 RCTs <sup>[1,2]</sup>. There was no significant difference between groups in KOOS – Pain and the 20 meter walk test, although the findings were inconclusive due to wide CIs that included the possibility of a between-group difference. The KOOS – ADL showed a significant difference between groups.

Quality of evidence across all critical outcomes: Low

| <b>PRP compared to CS at 6 months for OA of Hip / Knee</b>              |              |                      |              |                      |                  |                               |                            |          |                          |                              |                                                                              |
|-------------------------------------------------------------------------|--------------|----------------------|--------------|----------------------|------------------|-------------------------------|----------------------------|----------|--------------------------|------------------------------|------------------------------------------------------------------------------|
| <b>Certainty assessment</b>                                             |              |                      |              |                      |                  |                               | <b>Summary of findings</b> |          |                          |                              |                                                                              |
| Nº of participants (studies) Follow-up                                  | Risk of bias | Inconsistency        | Indirectness | Imprecision          | Publication bias | Overall certainty of evidence | Number of Patients         |          | Relative effect (95% CI) | Anticipated absolute effects |                                                                              |
|                                                                         |              |                      |              |                      |                  |                               | With CS at 6 months        | With PRP |                          | Risk with CS at 6 months     | Risk difference with PRP                                                     |
| <b>KOOS - Pain Relief (0-100, higher scores indicate improvement)</b>   |              |                      |              |                      |                  |                               |                            |          |                          |                              |                                                                              |
| 103 (2 RCTs)                                                            | not serious  | serious <sup>a</sup> | not serious  | serious <sup>b</sup> | none             | ⊕⊕○○<br>LOW                   | 46                         | 57       | -                        | -                            | MD <b>13.64 higher</b><br>(5.99 lower to 33.27 higher)                       |
| <b>KOOS – ADL (0-100, higher scores indicate improvement)</b>           |              |                      |              |                      |                  |                               |                            |          |                          |                              |                                                                              |
| 103 (2 RCTs)                                                            | not serious  | not serious          | not serious  | not serious          | none             | ⊕⊕⊕⊕<br>HIGH                  | 46                         | 57       | -                        | -                            | MD <b>10.73 higher</b><br>(2.71 higher to 18.76 higher)<br><b>Favors PRP</b> |
| <b>20 meter walk test (seconds) (lower scores indicate improvement)</b> |              |                      |              |                      |                  |                               |                            |          |                          |                              |                                                                              |
| 39 (1 RCT)                                                              | not serious  | not serious          | not serious  | serious <sup>b</sup> | none             | ⊕⊕⊕○<br>MODERATE              | 16                         | 23       | -                        | -                            | MD <b>2.6 lower</b><br>(5.63 lower to 0.43 higher)                           |

CI: Confidence interval; MD: Mean difference

## Explanations

- a. High between-study heterogeneity
- b. Wide 95% CI crosses line of no effect

**References**

1. Forogh B, Mianehsaz E, Shoaee S, Ahadi T, Raissi GR, Sajadi S. Effect of single injection of platelet-rich plasma in comparison with corticosteroid on knee osteoarthritis: a double-blind randomized clinical trial. J Sports Med Phys Fitness. 2016;56(7-8):901-908.
2. Joshi Jubert N, Rodriguez L, Reverte-Vinaixa MM, Navarro A. Platelet-Rich Plasma Injections for Advanced Knee Osteoarthritis: A Prospective, Randomized, Double-Blinded Clinical Trial. Orthop J Sports Med. 2017;5(2):2325967116689386.

**PICO 49. Intra-articular mesenchymal stem cells compared to intra-articular corticosteroid for patients with knee or hip OA**

Summary. The literature searches did not identify any studies that addressed this question.

Quality of evidence across all critical outcomes: Very low

**PICO 50. Intra-articular prolotherapy compared to intra-articular corticosteroid for patients with knee or hip OA**

Summary. The literature searches did not identify any studies that addressed this question.

Quality of evidence across all critical outcomes: Very low

**PICO 51: Intra-articular botox vs. intra-articular corticosteroids for OA of hip/knee**

Summary. This PICO was addressed by 1 RCT <sup>[1]</sup>. There was no significant difference between groups in WOMAC pain, WOMAC function, and 40 meter walk time, but these estimates were imprecise due to the small sample size and wide CIs around the effect sizes.

Quality of evidence across all critical outcomes: Moderate

| <b>BoNT-A 100 units compared to Methylprednisone 40mg (at 8 weeks) for OA of hip/knee</b> |  |                      |                     |                    |                            |                           |                                     |
|-------------------------------------------------------------------------------------------|--|----------------------|---------------------|--------------------|----------------------------|---------------------------|-------------------------------------|
| <b>Certainty assessment</b>                                                               |  |                      |                     |                    | <b>Summary of findings</b> |                           |                                     |
|                                                                                           |  | <b>Inconsistency</b> | <b>Indirectness</b> | <b>Imprecision</b> |                            | <b>Number of Patients</b> | <b>Anticipated absolute effects</b> |
|                                                                                           |  |                      |                     |                    |                            |                           |                                     |

| <b>BoNT-A 100 units compared to Methylprednisone 40mg (at 8 weeks) for OA of hip/knee</b> |                     |             |             |                      |                         |                                      |                                                |                              |                                 |                                                     |                                                    |
|-------------------------------------------------------------------------------------------|---------------------|-------------|-------------|----------------------|-------------------------|--------------------------------------|------------------------------------------------|------------------------------|---------------------------------|-----------------------------------------------------|----------------------------------------------------|
| <b>Certainty assessment</b>                                                               |                     |             |             |                      |                         |                                      | <b>Summary of findings</b>                     |                              |                                 |                                                     |                                                    |
| <b>Nº of participants (studies) Follow-up</b>                                             | <b>Risk of bias</b> |             |             |                      | <b>Publication bias</b> | <b>Overall certainty of evidence</b> | <b>With Methylprednisone 40mg (at 8 weeks)</b> | <b>With BoNT-A 100 units</b> | <b>Relative effect (95% CI)</b> | <b>Risk with Methylprednisone 40mg (at 8 weeks)</b> | <b>Risk difference with BoNT-A 100 units</b>       |
| <b>WOMAC pain (0-20, lower scores indicate improvement)</b>                               |                     |             |             |                      |                         |                                      |                                                |                              |                                 |                                                     |                                                    |
| 40 (1 RCT)                                                                                | not serious         | not serious | not serious | serious <sup>a</sup> | none                    | ⊕⊕⊕○<br>MODERATE                     | 20                                             | 20                           | -                               | -                                                   | MD <b>0.3 lower</b><br>(2.19 lower to 1.59 higher) |
| <b>WOMAC function (0-20, lower scores indicate improvement)</b>                           |                     |             |             |                      |                         |                                      |                                                |                              |                                 |                                                     |                                                    |
| 40 (1 RCT)                                                                                | not serious         | not serious | not serious | serious <sup>a</sup> | none                    | ⊕⊕⊕○<br>MODERATE                     | 20                                             | 20                           | -                               | -                                                   | MD <b>2.1 lower</b><br>(8.98 lower to 4.78 higher) |
| <b>40m walk (seconds) (lower scores indicate improvement)</b>                             |                     |             |             |                      |                         |                                      |                                                |                              |                                 |                                                     |                                                    |
| 40 (1 RCT)                                                                                | not serious         | not serious | not serious | serious <sup>a</sup> | none                    | ⊕⊕⊕○<br>MODERATE                     | 20                                             | 20                           | -                               | -                                                   | MD <b>6 higher</b><br>(2.42 lower to 14.42 higher) |

**CI:** Confidence interval; **MD:** Mean difference

## Explanations

a. Small study and 95% CI crosses no effect line



| <b>BoNT-A 200 units compared to Methylprednisone 40mg (at 8 weeks) for OA of hip/knee</b> |                     |                      |                     |                      |                         |                                      |                                                |                              |                                 |                                                     |                                                      |
|-------------------------------------------------------------------------------------------|---------------------|----------------------|---------------------|----------------------|-------------------------|--------------------------------------|------------------------------------------------|------------------------------|---------------------------------|-----------------------------------------------------|------------------------------------------------------|
| <b>Certainty assessment</b>                                                               |                     |                      |                     |                      |                         |                                      | <b>Summary of findings</b>                     |                              |                                 |                                                     |                                                      |
| <b>Nº of participants (studies) Follow-up</b>                                             | <b>Risk of bias</b> | <b>Inconsistency</b> | <b>Indirectness</b> | <b>Imprecision</b>   | <b>Publication bias</b> | <b>Overall certainty of evidence</b> | <b>Number of Patients</b>                      |                              | <b>Relative effect (95% CI)</b> | <b>Anticipated absolute effects</b>                 |                                                      |
|                                                                                           |                     |                      |                     |                      |                         |                                      | <b>With Methylprednisone 40mg (at 8 weeks)</b> | <b>With BoNT-A 200 units</b> |                                 | <b>Risk with Methylprednisone 40mg (at 8 weeks)</b> | <b>Risk difference with BoNT-A 200 units</b>         |
| <b>WOMAC pain (0-20, lower scores indicate improvement)</b>                               |                     |                      |                     |                      |                         |                                      |                                                |                              |                                 |                                                     |                                                      |
| 40 (1 RCT)                                                                                | not serious         | not serious          | not serious         | serious <sup>a</sup> | none                    | ⊕⊕⊕○<br>MODERATE                     | 20                                             | 20                           | -                               | -                                                   | <b>MD 1.2 higher</b><br>(0.69 lower to 3.09 higher)  |
| <b>WOMAC function (0-20, lower scores indicate improvement)</b>                           |                     |                      |                     |                      |                         |                                      |                                                |                              |                                 |                                                     |                                                      |
| 40 (1 RCT)                                                                                | not serious         | not serious          | not serious         | serious <sup>a</sup> | none                    | ⊕⊕⊕○<br>MODERATE                     | 20                                             | 20                           | -                               | -                                                   | <b>MD 5.2 higher</b><br>(1.78 lower to 12.18 higher) |
| <b>40m walk (seconds) (lower scores indicate improvement)</b>                             |                     |                      |                     |                      |                         |                                      |                                                |                              |                                 |                                                     |                                                      |
| 40 (1 RCT)                                                                                | not serious         | not serious          | not serious         | serious <sup>a</sup> | none                    | ⊕⊕⊕○<br>MODERATE                     | 20                                             | 20                           | -                               | -                                                   | <b>MD 0.9 higher</b><br>(2.03 lower to 3.83 higher)  |

**CI:** Confidence interval; **MD:** Mean difference

## Explanations

a. Small study and 95% CI crosses no effect line

## References

1. Boon AJ, Smith J, Dahm DL, Sorenson EJ, Larson DR, Fitz-Gibbon PD, et al. Efficacy of intra-articular botulinum toxin type A in painful knee osteoarthritis: a pilot study. PM R. 2010;2(4):268-276.

### **PICO 52. Intra-articular anesthetic compared to intra-articular corticosteroid for patients with knee or hip OA**

Summary. The literature searches did not identify any studies that addressed this question.

Quality of evidence across all critical outcomes: Very low

### **PICO 53. Intra-articular corticosteroids plus intra-articular anesthetic compared to intra-articular corticosteroid for patients with knee or hip OA**

Summary. The literature searches did not identify any studies that addressed this question.

Quality of evidence across all critical outcomes: Very low

### **PICO 54: Long acting intra-articular corticosteroids vs. short acting intra-articular corticosteroids in OA hip/knee**

Summary. This PICO was addressed by 2 RCTs <sup>[4]</sup>. Bodick et al. used three formulations of the long acting CS (TCA ER 10mg, 40mg, and 60mg) compared to short-acting CS (TCA IR 40 mg), while Conaghan et al. compared FX006 (32 mg) to TCA IR 40 mg. There were no significant between-group differences in pain or function for TCA ER 10 mg or 60 mg versus TCA IR 40 mg (Table 1 and Table 3). There were significant between-group differences in WOMAC pain and function between TCA ER (32 and 40 mg) versus TCA IR 40 mg, but the differences were small

and not clinically significant (Table 2). There was no significant difference in SAE between long acting CS (any dose) and short acting CS, but the number of events were too small to definitively rule out the possibility of a difference.

Quality of evidence across all critical outcomes: Moderate

| <b>Table 1. TCA ER 10mg compared to TCA IR 40mg for OA knee</b>                        |                     |                      |                     |                      |                         |                                      |                            |                         |                                 |                                     |                                                     |
|----------------------------------------------------------------------------------------|---------------------|----------------------|---------------------|----------------------|-------------------------|--------------------------------------|----------------------------|-------------------------|---------------------------------|-------------------------------------|-----------------------------------------------------|
| <b>Certainty assessment</b>                                                            |                     |                      |                     |                      |                         |                                      | <b>Summary of findings</b> |                         |                                 |                                     |                                                     |
| <b>Nº of participants (studies) Follow-up</b>                                          | <b>Risk of bias</b> | <b>Inconsistency</b> | <b>Indirectness</b> | <b>Imprecision</b>   | <b>Publication bias</b> | <b>Overall certainty of evidence</b> | <b>Number of Patients</b>  |                         | <b>Relative effect (95% CI)</b> | <b>Anticipated absolute effects</b> |                                                     |
|                                                                                        |                     |                      |                     |                      |                         |                                      | <b>With TCA IR 40mg</b>    | <b>With TCA ER 10mg</b> |                                 | <b>Risk with TCA IR 40mg</b>        | <b>Risk difference with TCA ER 10mg</b>             |
| <b>WOMAC Pain (0-20, change from baseline) (lower scores indicate improvement)</b>     |                     |                      |                     |                      |                         |                                      |                            |                         |                                 |                                     |                                                     |
| 109 (1 RCT)                                                                            | not serious         | not serious          | not serious         | serious <sup>a</sup> | none                    | ⊕⊕⊕○<br>MODERATE                     | 51                         | 58                      | -                               | -                                   | MD <b>0.27 lower</b><br>(0.56 lower to 0.02 higher) |
| <b>WOMAC Function (0-68, change from baseline) (lower scores indicate improvement)</b> |                     |                      |                     |                      |                         |                                      |                            |                         |                                 |                                     |                                                     |
| 109 (1 RCT)                                                                            | not serious         | not serious          | not serious         | serious <sup>a</sup> | none                    | ⊕⊕⊕○<br>MODERATE                     | 51                         | 58                      | -                               | -                                   | MD <b>0.28 lower</b><br>(0.56 lower to 0.00 higher) |
| <b>NRS mean daily pain (change from baseline to 12 weeks)</b>                          |                     |                      |                     |                      |                         |                                      |                            |                         |                                 |                                     |                                                     |
| 109 (1 RCT)                                                                            | not serious         | not serious          | not serious         | serious <sup>a</sup> | none                    | ⊕⊕⊕○<br>MODERATE                     | 51                         | 58                      | -                               | -                                   | MD <b>0.30 lower</b><br>(1.13 lower to 0.53 higher) |
| <b>Serious adverse events</b>                                                          |                     |                      |                     |                      |                         |                                      |                            |                         |                                 |                                     |                                                     |

| Table 1. TCA ER 10mg compared to TCA IR 40mg for OA knee |             |             |             |                      |      |                  |                     |                |                                  |              |                                                     |
|----------------------------------------------------------|-------------|-------------|-------------|----------------------|------|------------------|---------------------|----------------|----------------------------------|--------------|-----------------------------------------------------|
| Certainty assessment                                     |             |             |             |                      |      |                  | Summary of findings |                |                                  |              |                                                     |
| 109<br>(1 RCT)                                           | not serious | not serious | not serious | serious <sup>a</sup> | none | ⊕⊕⊕○<br>MODERATE | 2/51<br>(3.9%)      | 1/58<br>(1.7%) | <b>OR 0.43</b><br>(0.04 to 4.89) | 39 per 1,000 | <b>22 fewer per 1,000</b><br>(38 fewer to 127 more) |

**CI:** Confidence interval; **MD:** Mean difference; **OR:** Odds ratio

## Explanations

a. Wide 95% CI crosses line of no effect

| Table 2. TCA ER 40mg compared to TCA IR 40mg for OA knee                               |              |               |              |             |                  |                               |                     |                  |                          |                              |                                                                                |
|----------------------------------------------------------------------------------------|--------------|---------------|--------------|-------------|------------------|-------------------------------|---------------------|------------------|--------------------------|------------------------------|--------------------------------------------------------------------------------|
| Certainty assessment                                                                   |              |               |              |             |                  |                               | Summary of findings |                  |                          |                              |                                                                                |
| № of participants (studies)<br>Follow-up                                               | Risk of bias | Inconsistency | Indirectness | Imprecision | Publication bias | Overall certainty of evidence | Number of Patients  |                  | Relative effect (95% CI) | Anticipated absolute effects |                                                                                |
|                                                                                        |              |               |              |             |                  |                               | With TCA IR 40mg    | With TCA ER 40mg |                          | Risk with TCA IR 40mg        | Risk difference with TCA ER 40mg                                               |
| <b>WOMAC Pain (0-20, change from baseline) (lower scores indicate improvement)</b>     |              |               |              |             |                  |                               |                     |                  |                          |                              |                                                                                |
| 432<br>(2 RCTs)                                                                        | not serious  | not serious   | not serious  | not serious | none             | ⊕⊕⊕⊕<br>HIGH                  | 212                 | 220              | -                        | -                            | MD <b>0.24 lower</b><br>(0.42 lower to 0.05 lower)<br><br><b>Favprs TCA ER</b> |
| <b>WOMAC Function (0-68, change from baseline) (lower scores indicate improvement)</b> |              |               |              |             |                  |                               |                     |                  |                          |                              |                                                                                |

| Table 2. TCA ER 40mg compared to TCA IR 40mg for OA knee      |             |             |             |                      |      |                  |                     |                 |                                  |              |                                                                                |  |
|---------------------------------------------------------------|-------------|-------------|-------------|----------------------|------|------------------|---------------------|-----------------|----------------------------------|--------------|--------------------------------------------------------------------------------|--|
| Certainty assessment                                          |             |             |             |                      |      |                  | Summary of findings |                 |                                  |              |                                                                                |  |
| 432<br>(2 RCTs)                                               | not serious | not serious | not serious | not serious          | none | ⊕⊕⊕⊕<br>HIGH     | 212                 | 220             | -                                | -            | MD <b>0.26 lower</b><br>(0.40 lower to 0.12 lower)<br><br><b>Favprs TCA ER</b> |  |
| <b>NRS mean daily pain (change from baseline to 12 weeks)</b> |             |             |             |                      |      |                  |                     |                 |                                  |              |                                                                                |  |
| 432<br>(2 RCTs)                                               | not serious | not serious | not serious | not serious          | none | ⊕⊕⊕⊕<br>HIGH     | 212                 | 220             | -                                | -            | MD <b>0.30 lower</b><br>(0.77 lower to 0.16 higher)                            |  |
| <b>Serious adverse events</b>                                 |             |             |             |                      |      |                  |                     |                 |                                  |              |                                                                                |  |
| 432<br>(2 RCTs)                                               | not serious | not serious | not serious | serious <sup>a</sup> | none | ⊕⊕⊕○<br>MODERATE | 6/212<br>(2.8%)     | 5/220<br>(2.3%) | <b>OR 0.75</b><br>(0.13 to 4.18) | 28 per 1,000 | <b>5 fewer per 1,000</b><br>(24 fewer to 117 more)                             |  |

CI: Confidence interval; MD: Mean difference; OR: Odds ratio

## Explanations

a. Wide 95% CI crosses line of no effect

| Table 3. TCA ER 60mg compared to TCA IR 40mg for OA knee |              |               |              |             |                  |                   |                     |  |                              |  |
|----------------------------------------------------------|--------------|---------------|--------------|-------------|------------------|-------------------|---------------------|--|------------------------------|--|
| Certainty assessment                                     |              |               |              |             |                  |                   | Summary of findings |  |                              |  |
| Nº of participants                                       | Risk of bias | Inconsistency | Indirectness | Imprecision | Publication bias | Overall certainty | Number of Patients  |  | Anticipated absolute effects |  |

**Table 3. TCA ER 60mg compared to TCA IR 40mg for OA knee**

| <b>Table 3. TCA ER 60mg compared to TCA IR 40mg for OA knee</b>                        |                |             |             |                      |      |                        |                             |                             |                                         |                                      |                                                                |
|----------------------------------------------------------------------------------------|----------------|-------------|-------------|----------------------|------|------------------------|-----------------------------|-----------------------------|-----------------------------------------|--------------------------------------|----------------------------------------------------------------|
| <b>Certainty assessment</b>                                                            |                |             |             |                      |      |                        | <b>Summary of findings</b>  |                             |                                         |                                      |                                                                |
| <b>(studies)<br/>Follow-up</b>                                                         |                |             |             |                      |      | <b>of<br/>evidence</b> | <b>With TCA<br/>IR 40mg</b> | <b>With TCA<br/>ER 60mg</b> | <b>Relative<br/>effect<br/>(95% CI)</b> | <b>Risk with<br/>TCA IR<br/>40mg</b> | <b>Risk<br/>difference<br/>with TCA ER<br/>60mg</b>            |
| <b>WOMAC Pain (0-20, change from baseline) (lower scores indicate improvement)</b>     |                |             |             |                      |      |                        |                             |                             |                                         |                                      |                                                                |
| 111<br>(1 RCT)                                                                         | not<br>serious | not serious | not serious | serious <sup>a</sup> | none | ⊕⊕⊕○<br>MODERATE       | 51                          | 60                          | -                                       | -                                    | <b>MD 0.2<br/>lower</b><br>(0.48 lower<br>to 0.08<br>higher)   |
| <b>WOMAC Function (0-68, change from baseline) (lower scores indicate improvement)</b> |                |             |             |                      |      |                        |                             |                             |                                         |                                      |                                                                |
| 111<br>(1 RCT)                                                                         | not<br>serious | not serious | not serious | serious <sup>a</sup> | none | ⊕⊕⊕○<br>MODERATE       | 51                          | 60                          | -                                       | -                                    | <b>MD 0.19<br/>lower</b><br>(0.47 lower<br>to 0.09<br>higher)  |
| <b>NRS mean daily pain (change from baseline to 12 weeks)</b>                          |                |             |             |                      |      |                        |                             |                             |                                         |                                      |                                                                |
| 111<br>(1 RCT)                                                                         | not<br>serious | not serious | not serious | serious <sup>a</sup> | none | ⊕⊕⊕○<br>MODERATE       | 51                          | 60                          | -                                       | -                                    | <b>MD 0.10<br/>higher</b><br>(0.73 lower<br>to 0.93<br>higher) |
| <b>Serious adverse events</b>                                                          |                |             |             |                      |      |                        |                             |                             |                                         |                                      |                                                                |
| 111<br>(1 RCT)                                                                         | not<br>serious | not serious | not serious | serious <sup>a</sup> | none | ⊕⊕⊕○<br>MODERATE       | 2/51<br>(3.9%)              | 0/60<br>(0.0%)              | <b>OR 0.16</b><br>(0.01 to<br>3.49)     | 39 per<br>1,000                      | <b>33 fewer<br/>per 1,000</b><br>(39 fewer to<br>85 more)      |

**CI:** Confidence interval; **MD:** Mean difference; **OR:** Odds ratio

## Explanations

a. Wide 95% CI crosses line of no effect

## References

1. Bodick N, Lufkin J, Willwerth C, Kumar A, Bolognese J, Schoonmaker C, et al. An intra-articular, extended-release formulation of triamcinolone acetonide prolongs and amplifies analgesic effect in patients with osteoarthritis of the knee: a randomized clinical trial. *J Bone Joint Surg Am*. 2015;97(11):877-888.
2. Conaghan PG, Hunter DJ, Cohen SB, Kraus VB, Berenbaum F, Lieberman JR, et al. Effects of a single intra-articular injection of a microsphere formulation of triamcinolone acetonide on knee osteoarthritis pain. *J Bone Joint Surg* 2018;100:666-677.

### **PICO 55. High-dose compared to low-dose intra-articular corticosteroid in patients with knee or hip OA**

Summary. The literature searches did not identify any studies that addressed this question.

Quality of evidence across all critical outcomes: Very low

### **PICO 56: NSAIDs vs. no treatment for people with knee and/or hip OA.**

Summary: The literature search identified 73 RCTs to evaluate this PICO question. Eight RCTs<sup>[1-8]</sup> were conducted in adults with hip OA only, 48 RCTs<sup>[9-53,68-70]</sup> were conducted in adults with knee OA only, and 16 studies were conducted in adults with hip or knee OA<sup>[59-67,71,72]</sup>. Follow-up ranged from 12 to 16 weeks for hip OA-only studies, 2 weeks to 6 months for knee OA-only studies, and 6 to 13 weeks for combined hip and knee OA studies.

Meta-analyses found significant between-group differences favoring NSAIDs over placebo for pain (WOMAC Pain and 100mm VAS) and self-reported function (WOMAC Function) in patients with hip OA (Table 1). Serious adverse events did not show a significant between-group difference at 12 to 16 week follow-up, but the findings were inconclusive due to a wide 95% CI that included the possibility of a between-group difference. One study<sup>[4]</sup> found an increase in gastrointestinal adverse events in the NSAID group, but the results were inconclusive due to the small number of events and wide CI that crossed the line of no effect.

Meta-analyses found significant between-group differences for pain (WOMAC Pain and global knee pain [VAS]) and self-reported function outcomes for knee OA at up to 24 weeks follow-up (Table 2). Petersen et al.<sup>[35]</sup> reported significant between-group differences in performance-related outcomes of gait speed, stair negotiation and sit-to-stand, but results were imprecise due to small study size. The reported risk of serious adverse events was inconsistent across studies and therefore results were inconclusive. Gastrointestinal adverse events occurred more frequently in the NSAID group. Similar findings were observed in studies that included both hip and knee OA patients (Table 3).

A Cochrane systematic review of RCTs comparing rofecoxib and placebo reported a significant increase in serious adverse events for patients in the rofecoxib arms when combined in a meta-analysis (Table 6).<sup>[66]</sup>

The quality of evidence was low, due primarily to serious risk of bias in the majority of the included studies and wide confidence intervals associated with the effect estimates for some critical outcomes.

Quality of evidence across all critical outcomes: Moderate



**Table 1. Oral NSAIDs vs. placebo in hip OA**

| <b>Table 1. Oral NSAIDs vs. placebo in hip OA</b>                                           |                      |                      |                     |                      |                         |                                      |                              |                                             |                                  |                                     |                                                                                 |
|---------------------------------------------------------------------------------------------|----------------------|----------------------|---------------------|----------------------|-------------------------|--------------------------------------|------------------------------|---------------------------------------------|----------------------------------|-------------------------------------|---------------------------------------------------------------------------------|
| <b>Certainty assessment</b>                                                                 |                      |                      |                     |                      |                         |                                      | <b>Summary of findings</b>   |                                             |                                  |                                     |                                                                                 |
| <b>Nº of participants (studies) Follow-up</b>                                               | <b>Risk of bias</b>  | <b>Inconsistency</b> | <b>Indirectness</b> | <b>Imprecision</b>   | <b>Publication bias</b> | <b>Overall certainty of evidence</b> | <b>Study event rates (%)</b> |                                             | <b>Relative effect (95% CI)</b>  | <b>Anticipated absolute effects</b> |                                                                                 |
|                                                                                             |                      |                      |                     |                      |                         |                                      | <b>With placebo</b>          | <b>With Oral NSAIDs v placebo in hip OA</b> |                                  | <b>Risk with placebo</b>            | <b>Risk difference with Oral NSAIDs v placebo in hip OA</b>                     |
| <b>WOMAC Pain subscale (Likert/100mm) 12-16 wks (lower scores indicate improvement)</b>     |                      |                      |                     |                      |                         |                                      |                              |                                             |                                  |                                     |                                                                                 |
| 1322 (2 RCTs)                                                                               | serious <sup>a</sup> | not serious          | not serious         | not serious          | none                    | ⊕⊕⊕○<br>MODERATE                     | 747                          | 575                                         | -                                | -                                   | SMD <b>0.29 lower</b><br>(0.41 lower to 0.18 lower)<br><br><b>Favors NSAIDs</b> |
| <b>WOMAC function subscale (Likert/100mm) 12-16 wks (lower scores indicate improvement)</b> |                      |                      |                     |                      |                         |                                      |                              |                                             |                                  |                                     |                                                                                 |
| 1322 (2 RCTs)                                                                               | serious <sup>a</sup> | not serious          | not serious         | not serious          | none                    | ⊕⊕⊕○<br>MODERATE                     | 747                          | 575                                         | -                                | -                                   | SMD <b>0.3 lower</b><br>(0.41 lower to 0.19 lower)<br><br><b>Favors NSAIDs</b>  |
| <b>Total number of pts with serious AE</b>                                                  |                      |                      |                     |                      |                         |                                      |                              |                                             |                                  |                                     |                                                                                 |
| 1677 (4 RCTs)                                                                               | serious <sup>a</sup> | not serious          | not serious         | serious <sup>b</sup> | none                    | ⊕⊕○○<br>LOW                          | 23/921 (2.5%)                | 18/756 (2.4%)                               | <b>OR 0.93</b><br>(0.40 to 2.17) | 25 per 1,000                        | <b>2 fewer per 1,000</b><br>(15 fewer to 28 more)                               |

**Table 1. Oral NSAIDs vs. placebo in hip OA**

| Certainty assessment                                   |                      |             |             |                      |      | Summary of findings |                 |                 |                                       |                |                                                         |
|--------------------------------------------------------|----------------------|-------------|-------------|----------------------|------|---------------------|-----------------|-----------------|---------------------------------------|----------------|---------------------------------------------------------|
| <b>Gastrointestinal AE (perforation, ulcer, bleed)</b> |                      |             |             |                      |      |                     |                 |                 |                                       |                |                                                         |
| 316<br>(1 RCT)                                         | serious <sup>a</sup> | not serious | not serious | serious <sup>b</sup> | none | ⊕⊕○○<br>LOW         | 0/155<br>(0.0%) | 3/161<br>(1.9%) | <b>OR 6.87</b><br>(0.35 to<br>134.05) | 0 per<br>1,000 | <b>0 fewer per<br/>1,000</b><br>(0 fewer to 0<br>fewer) |

**CI:** Confidence interval; **MD:** Mean difference; **OR:** Odds ratio

### Explanations

- a. Lack of clarity regarding blinding of assessors and allocation concealment, randomization methods not described
- b. Wide CI, small number of events

**Table 2. Oral NSAIDs compared to placebo in knee OA**

| <b>Table 2. Oral NSAIDs compared to placebo in knee OA</b>                                   |                      |                      |                     |                    |                         |                                      |                                |                         |                                 |                                     |                                                                                 |
|----------------------------------------------------------------------------------------------|----------------------|----------------------|---------------------|--------------------|-------------------------|--------------------------------------|--------------------------------|-------------------------|---------------------------------|-------------------------------------|---------------------------------------------------------------------------------|
| <b>Certainty assessment</b>                                                                  |                      |                      |                     |                    |                         |                                      | <b>Summary of findings</b>     |                         |                                 |                                     |                                                                                 |
| <b>Nº of participants (studies) Follow-up</b>                                                | <b>Risk of bias</b>  | <b>Inconsistency</b> | <b>Indirectness</b> | <b>Imprecision</b> | <b>Publication bias</b> | <b>Overall certainty of evidence</b> | <b>Study event rates (%)</b>   |                         | <b>Relative effect (95% CI)</b> | <b>Anticipated absolute effects</b> |                                                                                 |
|                                                                                              |                      |                      |                     |                    |                         |                                      | <b>With placebo in knee OA</b> | <b>With Oral NSAIDs</b> |                                 | <b>Risk with placebo in knee OA</b> | <b>Risk difference with Oral NSAIDs</b>                                         |
| <b>WOMAC Pain subscale (Likert/100mm) &lt;12 wks (lower scores indicate improvement)</b>     |                      |                      |                     |                    |                         |                                      |                                |                         |                                 |                                     |                                                                                 |
| 5105 (13 RCTs)                                                                               | serious <sup>a</sup> | not serious          | not serious         | not serious        | none                    | ⊕⊕⊕○<br>MODERATE                     | 2092                           | 3013                    | -                               | -                                   | SMD <b>0.47 lower</b><br>(0.68 lower to 0.27 lower)<br><br><b>Favors NSAIDs</b> |
| <b>WOMAC Pain subscale (Likert/100mm) 12-24 wks (lower scores indicate improvement)</b>      |                      |                      |                     |                    |                         |                                      |                                |                         |                                 |                                     |                                                                                 |
| 8125 (14 RCTs)                                                                               | serious <sup>a</sup> | not serious          | not serious         | not serious        | none                    | ⊕⊕⊕○<br>MODERATE                     | 3596                           | 4529                    | -                               | -                                   | SMD <b>0.35 lower</b><br>(0.43 lower to 0.27 lower)<br><br><b>Favors NSAIDs</b> |
| <b>WOMAC Function subscale (Likert/100mm) &lt;12 wks (lower scores indicate improvement)</b> |                      |                      |                     |                    |                         |                                      |                                |                         |                                 |                                     |                                                                                 |

**Table 2. Oral NSAIDs compared to placebo in knee OA**

| <b>Table 2. Oral NSAIDs compared to placebo in knee OA</b>                                  |                      |             |             |             |      |                  |                            |      |   |   |                                                                                 |
|---------------------------------------------------------------------------------------------|----------------------|-------------|-------------|-------------|------|------------------|----------------------------|------|---|---|---------------------------------------------------------------------------------|
| <b>Certainty assessment</b>                                                                 |                      |             |             |             |      |                  | <b>Summary of findings</b> |      |   |   |                                                                                 |
| 3835<br>(10 RCTs)                                                                           | serious <sup>a</sup> | not serious | not serious | not serious | none | ⊕⊕⊕○<br>MODERATE | 1481                       | 2354 | - | - | SMD <b>0.28 lower</b><br>(0.35 lower to 0.21 lower)<br><br><b>Favors NSAIDs</b> |
| <b>WOMAC Function subscale (Likert/100mm) 12-24 wks (lower scores indicate improvement)</b> |                      |             |             |             |      |                  |                            |      |   |   |                                                                                 |
| 8119<br>(14 RCTs)                                                                           | serious <sup>a</sup> | not serious | not serious | not serious | none | ⊕⊕⊕○<br>MODERATE | 3592                       | 4527 | - | - | SMD <b>0.4 lower</b><br>(0.51 lower to 0.3 lower)<br><br><b>Favors NSAIDs</b>   |
| <b>Global knee pain (100mm VAS) &lt;12 wks (lower scores indicate improvement)</b>          |                      |             |             |             |      |                  |                            |      |   |   |                                                                                 |
| 1020<br>(5 RCTs)                                                                            | serious <sup>a</sup> | not serious | not serious | not serious | none | ⊕⊕⊕○<br>MODERATE | 389                        | 631  | - | - | MD <b>4.44 lower</b><br>(7.43 lower to 1.46 lower)<br><br><b>Favors NSAIDs</b>  |
| <b>Global knee pain (100mm VAS) 12-16 wks (lower scores indicate improvement)</b>           |                      |             |             |             |      |                  |                            |      |   |   |                                                                                 |

**Table 2. Oral NSAIDs compared to placebo in knee OA**

| Certainty assessment                                                              |                      |             |             |                      |      |                  | Summary of findings |     |   |   |                                                                                   |
|-----------------------------------------------------------------------------------|----------------------|-------------|-------------|----------------------|------|------------------|---------------------|-----|---|---|-----------------------------------------------------------------------------------|
| 1133<br>(3 RCTs)                                                                  | serious <sup>a</sup> | not serious | not serious | not serious          | none | ⊕⊕⊕○<br>MODERATE | 559                 | 574 | - | - | MD <b>9.57 lower</b><br>(14.35 lower to 4.78 lower)<br><br><b>Favors NSAIDs</b>   |
| <b>Global knee pain (100mm VAS), 6 months (lower scores indicate improvement)</b> |                      |             |             |                      |      |                  |                     |     |   |   |                                                                                   |
| 345<br>(1 RCT)                                                                    | serious <sup>a</sup> | not serious | not serious | not serious          | none | ⊕⊕⊕○<br>MODERATE | 172                 | 173 | - | - | MD <b>6.3 lower</b><br>(11.01 lower to 1.59 lower)<br><br><b>Favors NSAIDs</b>    |
| <b>Gait speed (higher scores indicate improvement)</b>                            |                      |             |             |                      |      |                  |                     |     |   |   |                                                                                   |
| 23<br>(1 RCT)                                                                     | not serious          | not serious | not serious | serious <sup>c</sup> | none | ⊕⊕⊕○<br>MODERATE | 12                  | 11  | - | - | MD <b>0.11 higher</b><br>(0.06 higher to 0.16 higher)<br><br><b>Favors NSAIDs</b> |
| <b>Stair negotiation (climb time) (lower scores indicate improvement)</b>         |                      |             |             |                      |      |                  |                     |     |   |   |                                                                                   |

**Table 2. Oral NSAIDs compared to placebo in knee OA**

| Certainty assessment                                                  |                      |                      |             |                      |      |                  | Summary of findings |                    |                                  |              |                                                                                |
|-----------------------------------------------------------------------|----------------------|----------------------|-------------|----------------------|------|------------------|---------------------|--------------------|----------------------------------|--------------|--------------------------------------------------------------------------------|
| 23<br>(1 RCT)                                                         | not serious          | not serious          | not serious | serious <sup>c</sup> | none | ⊕⊕⊕○<br>MODERATE | 12                  | 11                 | -                                | -            | MD <b>0.26 lower</b><br>(0.02 lower to 0.50 lower)<br><br><b>Favors NSAIDs</b> |
| <b>Sit-to-stand (reps/30sec) (higher scores indicate improvement)</b> |                      |                      |             |                      |      |                  |                     |                    |                                  |              |                                                                                |
| 23<br>(1 RCT)                                                         | not serious          | not serious          | not serious | serious <sup>c</sup> | none | ⊕⊕⊕○<br>MODERATE | 12                  | 11                 | -                                | -            | MD <b>1 higher</b><br>(0.64 lower to 2.64 higher)                              |
| <b>Total number of patients with serious AE</b>                       |                      |                      |             |                      |      |                  |                     |                    |                                  |              |                                                                                |
| 13799<br>(26 RCTs)                                                    | serious <sup>a</sup> | serious <sup>d</sup> | not serious | not serious          | none | ⊕⊕○○<br>LOW      | 115/5678<br>(2.0%)  | 121/8121<br>(1.5%) | <b>OR 0.83</b><br>(0.62 to 1.11) | 19 per 1,000 | <b>3 fewer per 1,000</b><br>(7 fewer to 2 more)                                |
| <b>Gastrointestinal AE (perforation, ulcer, bleed)</b>                |                      |                      |             |                      |      |                  |                     |                    |                                  |              |                                                                                |
| 3508<br>(8 RCTs)                                                      | serious <sup>a</sup> | not serious          | not serious | serious <sup>b</sup> | none | ⊕⊕○○<br>LOW      | 2/1611<br>(0.1%)    | 18/1897<br>(0.9%)  | <b>OR 2.68</b><br>(1.02 to 7.01) | 1 per 1,000  | <b>2 more per 1,000</b><br>(0 fewer to 7 more)<br><br><b>Favors placebo</b>    |
| <b>Cardiovascular AE</b>                                              |                      |                      |             |                      |      |                  |                     |                    |                                  |              |                                                                                |

**Table 2. Oral NSAIDs compared to placebo in knee OA**

| Certainty assessment |                      |             |             |                      |      |             | Summary of findings |               |                                  |             |                                             |
|----------------------|----------------------|-------------|-------------|----------------------|------|-------------|---------------------|---------------|----------------------------------|-------------|---------------------------------------------|
| 2204 (5 RCTs)        | serious <sup>a</sup> | not serious | not serious | serious <sup>b</sup> | none | ⊕⊕○○<br>LOW | 2/952 (0.2%)        | 3/1252 (0.2%) | <b>OR 0.94</b><br>(0.22 to 3.93) | 2 per 1,000 | <b>0 fewer per 1000</b> (2 fewer to 6 more) |

**CI:** Confidence interval; **SMD:** Standardised mean difference; **MD:** Mean difference; **OR:** Odds ratio

**Explanations**

- a. Majority of studies had lack of clarity in blinding of assessors and allocation concealment; randomization methods not described
- b. Wide CI that crosses the line of no effect
- c. Small single study
- d. Variation in direction of effect across studies

**Table 3. Oral NSAIDs compared to placebo in hip and knee OA**

| <b>Table 3. Oral NSAIDs compared to placebo in hip and knee OA</b>                                 |                     |                      |                     |                    |                         |                                      |                            |                   |                                 |                                     |                                                                                  |
|----------------------------------------------------------------------------------------------------|---------------------|----------------------|---------------------|--------------------|-------------------------|--------------------------------------|----------------------------|-------------------|---------------------------------|-------------------------------------|----------------------------------------------------------------------------------|
| <b>Certainty assessment</b>                                                                        |                     |                      |                     |                    |                         |                                      | <b>Summary of findings</b> |                   |                                 |                                     |                                                                                  |
| <b>№ of participants (studies) Follow-up</b>                                                       | <b>Risk of bias</b> | <b>Inconsistency</b> | <b>Indirectness</b> | <b>Imprecision</b> | <b>Publication bias</b> | <b>Overall certainty of evidence</b> | <b>Number of Patients</b>  |                   | <b>Relative effect (95% CI)</b> | <b>Anticipated absolute effects</b> |                                                                                  |
|                                                                                                    |                     |                      |                     |                    |                         |                                      | <b>With Placebo</b>        | <b>With NSAID</b> |                                 | <b>Risk with Placebo</b>            | <b>Risk difference with NSAID</b>                                                |
| <b>WOMAC pain at 6 weeks (0-100, change from baseline) (lower scores indicate improvement)</b>     |                     |                      |                     |                    |                         |                                      |                            |                   |                                 |                                     |                                                                                  |
| 2275 (4 RCTs)                                                                                      | not serious         | not serious          | not serious         | not serious        | none                    | ⊕⊕⊕⊕<br>HIGH                         | 528                        | 1747              | -                               | -                                   | MD <b>11.67 lower</b><br>(13.61 lower to 9.72 lower)<br><br><b>Favors NSAIDs</b> |
| <b>WOMAC Pain at 12-13 weeks (0-100, change from baseline) (lower scores indicate improvement)</b> |                     |                      |                     |                    |                         |                                      |                            |                   |                                 |                                     |                                                                                  |
| 1805 (6 RCTs)                                                                                      | not serious         | not serious          | not serious         | not serious        | none                    | ⊕⊕⊕⊕<br>HIGH                         | 717                        | 1088              | -                               | -                                   | MD <b>10.14 lower</b><br>(12.54 lower to 7.74 lower)<br><br><b>Favors NSAIDs</b> |
| <b>Global Pain (VAS) (0-100, lower scores indicate improvement)</b>                                |                     |                      |                     |                    |                         |                                      |                            |                   |                                 |                                     |                                                                                  |
| 245 (1 RCT)                                                                                        | not serious         | not serious          | not serious         | not serious        | none                    | ⊕⊕⊕⊕<br>HIGH                         | 154                        | 91                | -                               | -                                   | MD <b>13 lower</b><br>(19.73 lower to 6.27 lower)<br><br><b>Favors NSAIDs</b>    |



**Table 3. Oral NSAIDs compared to placebo in hip and knee OA**

| Certainty assessment                                                                                   |             |             |             |             |      | Summary of findings |     |      |   |   |                                                                                 |
|--------------------------------------------------------------------------------------------------------|-------------|-------------|-------------|-------------|------|---------------------|-----|------|---|---|---------------------------------------------------------------------------------|
| <b>Global Pain (VAS) (change from baseline) (0-100, lower scores indicate improvement)</b>             |             |             |             |             |      |                     |     |      |   |   |                                                                                 |
| 245<br>(1 RCT)                                                                                         | not serious | not serious | not serious | not serious | none | ⊕⊕⊕⊕<br>HIGH        | 91  | 154  | - | - | MD <b>0.61 lower</b><br>(0.93 lower to 0.29 lower)<br><br><b>Favors NSAIDs</b>  |
| <b>WOMAC function at 6 weeks (change from baseline) (0-100, lower scores indicate improvement)</b>     |             |             |             |             |      |                     |     |      |   |   |                                                                                 |
| 2330<br>(5 RCTs)                                                                                       | not serious | not serious | not serious | not serious | none | ⊕⊕⊕⊕<br>HIGH        | 555 | 1775 | - | - | MD <b>9.16 lower</b><br>(12.71 lower to 5.62 lower)<br><br><b>Favors NSAIDs</b> |
| <b>WOMAC Function at 12-13 weeks (0-100, change from baseline) (lower scores indicate improvement)</b> |             |             |             |             |      |                     |     |      |   |   |                                                                                 |
| 1104<br>(4 RCTs)                                                                                       | not serious | not serious | not serious | not serious | none | ⊕⊕⊕⊕<br>HIGH        | 369 | 735  | - | - | MD <b>8.16 lower</b><br>(11.12 lower to 5.20 lower)<br><br><b>Favors NSAIDs</b> |
| <b>Total number of patients with serious AE</b>                                                        |             |             |             |             |      |                     |     |      |   |   |                                                                                 |

**Table 3. Oral NSAIDs compared to placebo in hip and knee OA**

| Certainty assessment                     |             |             |             |                      |      |                  | Summary of findings |                   |                                   |              |                                                    |
|------------------------------------------|-------------|-------------|-------------|----------------------|------|------------------|---------------------|-------------------|-----------------------------------|--------------|----------------------------------------------------|
| 2333<br>(5 RCTs)                         | not serious | not serious | not serious | serious <sup>a</sup> | none | ⊕⊕⊕○<br>MODERATE | 9/675<br>(1.3%)     | 27/1658<br>(1.6%) | <b>OR 1.40</b><br>(0.44 to 4.46)  | 13 per 1,000 | <b>5 more per 1,000</b><br>(7 fewer to 44 more)    |
| <b>Serious AE - Gastroduodenal ulcer</b> |             |             |             |                      |      |                  |                     |                   |                                   |              |                                                    |
| 218<br>(1 RCT)                           | not serious | not serious | not serious | not serious          | none | ⊕⊕⊕⊕<br>HIGH     | 3/80<br>(3.8%)      | 23/138<br>(16.7%) | <b>OR 5.13</b><br>(1.49 to 17.69) | 38 per 1,000 | <b>129 more per 1,000</b><br>(17 more to 371 more) |

CI: Confidence interval; MD: Mean difference; OR: Odds ratio

## Explanations

a. Wide 95% CI crosses line of no effect

**Table 4. RCT data not suitable for effect size calculation or combining with other data (hip OA)**

| Ref ID, Author, year | Study type     | Duration               | Population Description    | Treatment given to relevant population                                                                                                                         | Results                                                                                                                                                                                                                                       |
|----------------------|----------------|------------------------|---------------------------|----------------------------------------------------------------------------------------------------------------------------------------------------------------|-----------------------------------------------------------------------------------------------------------------------------------------------------------------------------------------------------------------------------------------------|
| [1130, Kivitz, 2001] | RCT            | 12 weeks               | 1061 patients with hip OA | Celecoxib, 200mg/day (n=207)* or naproxen 1000mg/day (n=207) or placebo (n=218)<br>*Data tabled for 200mg vs. placebo only, which represents usual daily dose. | Global pain (VAS/100mm) Least square mean improvement from baseline at 12 weeks:<br>Celecoxib: -23.3<br>Naproxen: -22.3<br>Placebo: -11.1<br><br>2 total serious adverse events were reported, both were GI bleeds (naproxen =1, placebo =1). |
| [3371, Mejjad, 2000] | RCT, crossover | 3 hours each crossover | 16 outpatients            | Etodolac, 300mg, single dose or placebo. All 16 patients were given a single                                                                                   | VAS (100mm) scores decreased significantly between t0 and t180 for etodolac and placebo groups (P<0.0009 and P<0.03, respectively). At t0, VAS scores were significantly higher for the                                                       |

| Ref ID, Author, year     | Study type     | Duration                                                                                      | Population Description     | Treatment given to relevant population                                                                                                                                                                                                                                                                  | Results                                                                                                                                                                                                                                                                                                                                                                                                                                                                                                                                             |
|--------------------------|----------------|-----------------------------------------------------------------------------------------------|----------------------------|---------------------------------------------------------------------------------------------------------------------------------------------------------------------------------------------------------------------------------------------------------------------------------------------------------|-----------------------------------------------------------------------------------------------------------------------------------------------------------------------------------------------------------------------------------------------------------------------------------------------------------------------------------------------------------------------------------------------------------------------------------------------------------------------------------------------------------------------------------------------------|
|                          |                |                                                                                               | (8M, 8F) with hip OA       | dose of drug or placebo, then analyses were done hourly for 3 hours, After a 7-day washout period the crossover medication was given and analyses again were recorded hourly for 3 hours.                                                                                                               | etodolac group (m±SD: 54.8±19.3 mm) than the placebo group (m±SD: 37.2±20.4 mm) (P<0.01); by t180, the mean VAS scores for the two treatment groups had become statistically comparable.<br><br>No serious adverse events were reported by the investigators.                                                                                                                                                                                                                                                                                       |
| [4322, Quiding, 1992]    | RCT, crossover | 10 days total for 3-way crossover , 32hours each drug dose cycle with 48 hour washout between | 27 outpatients with hip OA | Ibuprofen, 200mg or placebo, 6 total doses starting at 10.00h, then 18.00h, then every 4 <sup>th</sup> hour.<br><br>Study groups also included ibuprofen/codeine combination treatment arm. Since that combination is not on our list of interventions, we did not report data from that treatment arm. | <u>Global pain (100mm VAS):</u><br><b>8 hour mean intensity values: (recorded hourly for 8 hours after the 1st and 6<sup>th</sup> doses):</b><br>Pretreatment VAS score was 31-37mm<br>After 1 <sup>st</sup> dose: ibuprofen 27mm<br>placebo 26mm<br>After 6 <sup>th</sup> dose: ibuprofen 17mm<br>placebo 29mm<br><b>Pain intensity index (mm/h):</b><br>After 1 <sup>st</sup> dose: ibuprofen 3.3<br>placebo 3.4<br>After 6 <sup>th</sup> dose: ibuprofen 2.1<br>placebo 3.9<br><br>No serious adverse events were reported by the investigators. |
| [3878, Hodgkinson, 1973] | RCT            | 5 years                                                                                       | 45 outpatients with hip OA | Indomethacin, (dose starting at 25mg twice daily, increased by 25mg daily each week until optimum dose was reached) or placebo. Dosage adjustment 10-12 weeks.                                                                                                                                          | <u>Serious adverse events:</u><br>GI bleed: 1<br>Perforated gastric ulcer: 2<br>Deaths: 8 (includes 4 coronary occlusions, 1 congestive heart failure, 2 cerebrovascular accidents)                                                                                                                                                                                                                                                                                                                                                                 |

**Table 5. RCT data not suitable for effect size calculation or combining with other data (knee OA)**

| Ref ID, Author, year  | Study type    | Duration                      | Population Description                                                             | Treatment given to relevant population                                                                                                                                                                                 | Results                                                                                                                                                                                                                                                                                                                                                                                                                                                                                                                                                                                                                                                                                                                                                                                                                                                                                                                                                |
|-----------------------|---------------|-------------------------------|------------------------------------------------------------------------------------|------------------------------------------------------------------------------------------------------------------------------------------------------------------------------------------------------------------------|--------------------------------------------------------------------------------------------------------------------------------------------------------------------------------------------------------------------------------------------------------------------------------------------------------------------------------------------------------------------------------------------------------------------------------------------------------------------------------------------------------------------------------------------------------------------------------------------------------------------------------------------------------------------------------------------------------------------------------------------------------------------------------------------------------------------------------------------------------------------------------------------------------------------------------------------------------|
| [6742, Mayorga, 2017] | RCT crossover | 3 treatment periods of 7 days | 33 patients with painful knee OA                                                   | 500mg naproxen twice daily or placebo in 3-way crossover.<br>* Study groups also included mavatrep treatment arm. Since that drug is not on our list of interventions, we did not report data from that treatment arm. | <p><u>7 day mean (SD) average daily current NRS scores (11 point, 0-10 scale)</u><br/>                     Naproxen: 3.49 (1.544)<br/>                     Placebo: 4.9 (1.413)<br/>                     No statistically significant difference (<math>p=0.271</math>)</p> <p><u>4 hour postdose sum of pain intensity (SPID scores):</u><br/>                     Pain after stair climbing, mean (SD):<br/>                     Naproxen: 2.1 (2.66)<br/>                     Placebo: 1.2 (2.07)<br/>                     No statistically significant between-group difference (<math>p=0.229</math>).</p> <p>Pain at rest, mean (SD) before stair climbing:<br/>                     Naproxen: 1.9 (3.37)<br/>                     Placebo: 0.8 (2.21)<br/>                     No statistically significant between-group difference (<math>p=0.364</math>).</p> <p>No deaths or serious adverse events were reported by the investigators.</p> |
| [899, Sawitzke, 2010] | RCT           | 2 years                       | 662 patients from GAIT trial aged $\geq$ years with painful knee OA for six months | Population is a subset of GAIT trial, longer term follow up from original study. Patients randomized to receive celecoxib 200mg/day (n=142) or placebo (n=131).                                                        | <p><u>WOMAC Pain subscale over 24 months vs. placebo</u><br/>                     Decline in pain score:<br/>                     Celecoxib 32.80 vs placebo 30.21, 95% CI (-7.18 to 1.77)</p> <p><u>WOMAC Function subscale over 24 months vs. placebo:</u><br/>                     Celecoxib 24.07 vs placebo 23.14, 95% CI (-6.02 to 4.16)</p> <p><u>Total patients with SAE reported:</u><br/>                     Celecoxib: 4</p>                                                                                                                                                                                                                                                                                                                                                                                                                                                                                                               |

| Ref ID, Author, year | Study type       | Duration | Population Description                                                                                                                                                                                                                                                                | Treatment given to relevant population                                                                                                               | Results                                                                                                                                                                                                                                                                                                                                                                                                                                                                                                                                                                                                                                                                                                                                                                                                                                                                                                                                                                        |
|----------------------|------------------|----------|---------------------------------------------------------------------------------------------------------------------------------------------------------------------------------------------------------------------------------------------------------------------------------------|------------------------------------------------------------------------------------------------------------------------------------------------------|--------------------------------------------------------------------------------------------------------------------------------------------------------------------------------------------------------------------------------------------------------------------------------------------------------------------------------------------------------------------------------------------------------------------------------------------------------------------------------------------------------------------------------------------------------------------------------------------------------------------------------------------------------------------------------------------------------------------------------------------------------------------------------------------------------------------------------------------------------------------------------------------------------------------------------------------------------------------------------|
|                      |                  |          |                                                                                                                                                                                                                                                                                       | Data is reported elsewhere for glucosamine/chondroitin /combination arms (total n=389)                                                               | Placebo: 3<br><br>2 CVA were reported in the celecoxib group<br>1 abdominal wall abscess was reported in the celecoxib group.                                                                                                                                                                                                                                                                                                                                                                                                                                                                                                                                                                                                                                                                                                                                                                                                                                                  |
| [3262, Asmus, 2014]  | 2 identical RCTs | 6 weeks  | Patients aged $\geq 40$ years with OA of the knee in a flare state, who had failed prior treatment with both prescription strength naproxen (at least 750 mg/day for 2 weeks) and ibuprofen (at least 1200 mg/day for 2 weeks) within the past 5 years due to either lack of efficacy | Celecoxib 200mg/day or placebo<br><br>Study 1:<br>celecoxib, n = 186;<br>placebo, n = 184<br><br>Study 2:<br>celecoxib, n = 194;<br>placebo, n = 186 | Study 1: Improvement from baseline to week 6 was significantly better for celecoxib than placebo for all WOMAC subscales (p < 0.001)<br>One serious adverse event was reported for each group.<br><br>Study 2: Improvement from baseline to week 6 was significantly better for celecoxib and placebo for the WOMAC physical function subscale, but the difference in the pain subscale was not significant.<br><br>One serious adverse event was reported for each group.<br><br><u>WOMAC Pain subscale least squares mean change (SE) from baseline to week 6:</u><br><br>Study 1: -2.3 (0.42) 95% CI ( -3.2 to -1.5), p= <0.001, favors celecoxib<br>Study 2: -0.8 (0.39) 95% CI (-1.5 to 0.008), p= 0.052, favors celecoxib<br><br><u>WOMAC function subscale least squares mean change from baseline to week 6:</u><br>Study 1: -7.5 (1.4) 95% CI (-10.3 to -4.6), p= <0.001, favors celecoxib<br>Study 2: -2.4 (1.2) 95% CI (-4.9 to -0.006), p= 0.049, favors celecoxib |

| Ref ID, Author, year   | Study type       | Duration | Population Description                                                                             | Treatment given to relevant population                                                                                                                                                                                                        | Results                                                                                                                                                                                                                                                                                                                                                                                                                                                                                                                                                                       |
|------------------------|------------------|----------|----------------------------------------------------------------------------------------------------|-----------------------------------------------------------------------------------------------------------------------------------------------------------------------------------------------------------------------------------------------|-------------------------------------------------------------------------------------------------------------------------------------------------------------------------------------------------------------------------------------------------------------------------------------------------------------------------------------------------------------------------------------------------------------------------------------------------------------------------------------------------------------------------------------------------------------------------------|
|                        |                  |          | and/or tolerability<br><br>Study 1: n=380<br>Study 2: n=388                                        |                                                                                                                                                                                                                                               |                                                                                                                                                                                                                                                                                                                                                                                                                                                                                                                                                                               |
| [3517, Huggins, 2012]  | RCT              | 2 weeks  | 114 patients aged 18-75 years, with knee OA                                                        | Naproxen 500mg twice daily (n=36) or placebo (n=70)<br>Study groups also included investigational drug PF-04457845 treatment arm (n=37). Since that drug is not on our list of interventions, we did not report data from that treatment arm. | <u>Mean differences (80% confidence intervals) from placebo in WOMAC scores at end of treatment:</u><br>Pain (out of 20): -1.13 (-1.79, -0.47)<br>Function (out of 48): -4.49 (-9.04, -3.27)<br><br>No serious adverse events were reported by the investigators.                                                                                                                                                                                                                                                                                                             |
| [3884, Hochberg, 2011] | 2 identical RCTs | 12 weeks | Patients aged ≥50 years with a 6-month history of symptomatic, clinically diagnosed OA of the knee | Celecoxib 200mg once daily or placebo<br><br>Study 1: celecoxib, n = 247; placebo, n = 124<br><br>Study 2: celecoxib, n = 247; placebo, n = 124                                                                                               | <u>Least mean change compared with placebo at 12 weeks:</u><br><b>WOMAC pain subscale:</b><br>Study 1: -6.1, 95% CI (-11.8, -0.5), p=0.032, favors celecoxib<br>Study 2: -4.6, 95% CI (-10.3, 1.2), p=0.118, favors celecoxib<br><br><b>WOMAC function subscale:</b><br>Study 1: -5.7, 95% CI (-11.2, -0.1), p=0.045, favors celecoxib<br>Study 2: -4.5, 95% CI (-10.3, 1.3), p=0.131, favors celecoxib<br><u>Patients with one or more serious adverse events reported:</u><br>Study 1: celecoxib 5 (2.1%) vs. placebo 0<br>Study 2: celecoxib 3 (1.2%) vs. placebo 1 (0.8%) |

| Ref ID, Author, year    | Study type    | Duration | Population Description                                   | Treatment given to relevant population                                                                                                                                                                                                                         | Results                                                                                                                                                                                                                                                                                                                                                             |
|-------------------------|---------------|----------|----------------------------------------------------------|----------------------------------------------------------------------------------------------------------------------------------------------------------------------------------------------------------------------------------------------------------------|---------------------------------------------------------------------------------------------------------------------------------------------------------------------------------------------------------------------------------------------------------------------------------------------------------------------------------------------------------------------|
|                         |               |          | Study 1:<br>n=619<br>Study 2:<br>n=615                   |                                                                                                                                                                                                                                                                |                                                                                                                                                                                                                                                                                                                                                                     |
| [8177, Peeva, 2010]     | RCT crossover | 3 days   | 22 patients aged ≥45 years of age with knee OA >6 months | naproxen 500 mg bid or placebo in each of three periods<br>* Study groups also included tramadol/acetaminophen treatment arm. Since that drug combination is not on our list of interventions, we did not report data from that treatment arm.                 | <u>WOMAC pain subscale score mean changes from baseline:</u><br>Day 1: naproxen -5.8, placebo -5.6<br>Day 3: naproxen -23.8, placebo -6.8<br><br><u>WOMAC function subscale score mean changes from baseline:</u><br>Day 1: naproxen -6.9, placebo -5.2<br>Day 3: naproxen -22.1, placebo -6.2<br><br>No serious adverse events were reported by the investigators. |
| [1349, Schnitzer, 2005] | RCT           | 6 weeks  | 672 patients, aged 40 years or older, with knee OA       | Rofecoxib 25mg/day (n=98) or naproxen 500mg/bid (n=117) or placebo (n=104)<br>* Study groups also included investigational drug AZD3582 treatment arms. Since that drug is not on our list of interventions, we did not report data from those treatment arms. | <u>Adverse events:</u><br>Rofecoxib: 1 upper GI hemorrhage<br>Naproxen: 1 upper GI hemorrhage, 1 myocardial infarction, 2 other SAEs<br>Placebo: 1 myocardial infarction                                                                                                                                                                                            |
| [1612, McKenna, 2001]   | RCT           | 6 weeks  | 182 patients, aged 40 years or                           | celecoxib 200mg/day (n=63) or rofecoxib                                                                                                                                                                                                                        | <u>Global pain VAS (100mm) least squares mean change from baseline at 6 weeks:</u><br>Celecoxib: -39                                                                                                                                                                                                                                                                |

| Ref ID, Author, year | Study type | Duration                                          | Population Description             | Treatment given to relevant population                                                                                                                                                                                                                 | Results                                                                                                                                                                                                                                                                                                                                                                                                                                                                                                                                                                                                                                                            |
|----------------------|------------|---------------------------------------------------|------------------------------------|--------------------------------------------------------------------------------------------------------------------------------------------------------------------------------------------------------------------------------------------------------|--------------------------------------------------------------------------------------------------------------------------------------------------------------------------------------------------------------------------------------------------------------------------------------------------------------------------------------------------------------------------------------------------------------------------------------------------------------------------------------------------------------------------------------------------------------------------------------------------------------------------------------------------------------------|
|                      |            |                                                   | older, with knee OA                | 25mg/day (n=59) or placebo (n=60)                                                                                                                                                                                                                      | <p>Rofecoxib: -40<br/>Placebo: -25</p> <p><u>Pain on walking VAS (100mm) least squares mean change from baseline at 6 weeks:</u><br/>Celecoxib: -38<br/>Rofecoxib: -38<br/>Placebo: -25</p> <p>One serious adverse event was reported in the celecoxib group.</p>                                                                                                                                                                                                                                                                                                                                                                                                  |
| [5147, Scott, 2000]  | RCT        | Up to 5 years; assessments reported after 4 weeks | 812 patients with knee OA          | <p>Indomethacin, 25mg three times daily (n=202) or placebo (n=303).</p> <p>Study groups also included tiaprofenic acid treatment arm (n=307). Since that drug is not on our list of interventions, we did not report data from that treatment arm.</p> | <p><u>Mean change in overall VAS Pain score at 4 weeks:</u><br/>Indomethacin: -4.8<br/>Placebo: -0.2</p> <p><u>Number of patients with severe overall pain at baseline vs. 4 weeks:</u><br/>Indomethacin: 75/187 (40%) vs. 37/141 (21%)<br/>Placebo: 106/262 (40%) vs. 101/155 (39%)</p> <p>Investigators reported that after 4 weeks there were no further significant differences in overall pain between active treatment and placebo groups. Patients who remained on treatment for 12 months or longer also showed no measurable benefit from active treatment.</p> <p>Only one serious adverse event was reported, a GI bleed in the indomethacin group.</p> |
| [6401, Simon, 1998]  | RCT        | 2 weeks                                           | 293 patients with knee OA in flare | <p>Celecoxib 200mg twice daily (n=73) or placebo (n=71).</p> <p>Data tabled for 200mg vs. placebo only, which</p>                                                                                                                                      | <p><u>Global pain (100mm VAS) mean change from baseline at 2 weeks:</u><br/>Celecoxib: -30.52mm<br/>Placebo: -15.48mm</p>                                                                                                                                                                                                                                                                                                                                                                                                                                                                                                                                          |



| Ref ID, Author, year     | Study type | Duration | Population Description    | Treatment given to relevant population                                                                                       | Results                                                                                                                                                                                                                                                                                                                                                                                                                                                                                            |
|--------------------------|------------|----------|---------------------------|------------------------------------------------------------------------------------------------------------------------------|----------------------------------------------------------------------------------------------------------------------------------------------------------------------------------------------------------------------------------------------------------------------------------------------------------------------------------------------------------------------------------------------------------------------------------------------------------------------------------------------------|
|                          |            |          |                           | represents usual daily dose.                                                                                                 |                                                                                                                                                                                                                                                                                                                                                                                                                                                                                                    |
| [3511, Makarowski, 1996] | RCT        | 6 weeks  | 347 patients with knee OA | Oxaprozin 1200 mg/day (n=116) or nabumetone 1500 mg/day (n=115) or placebo (n=116)                                           | <p><u>Knee pain on weight bearing, mean % change from baseline at 6 weeks:</u><br/>Oxaprozin - 47% vs. 30% placebo, <math>P \leq 0.05</math><br/>Nabumetone - 40% vs. 30% placebo, <math>P \leq 0.05</math></p> <p><u>Knee pain on motion, mean % change from baseline at 6 weeks:</u><br/>Oxaprozin - 56% vs. 34.5% placebo, <math>P \leq 0.05</math><br/>Nabumetone - 50.5% vs. 34.5% placebo, <math>P \leq 0.05</math></p> <p>No serious adverse events were reported by the investigators.</p> |
| [7954, Dieppe, 1993]     | RCT        | 2 years  | 89 patients with knee OA  | 51 patients completed the study. ITT was not attempted.<br>Diclofenac slow release 100mg once daily (n=31) or placebo (n=21) | <p><u>Number of patients with functional difficulty at entry and at study completion (2 years)</u></p> <p><b>Walking:</b><br/>Diclofenac: 6 (19%) vs. 7 (23%)<br/>Placebo: 2 (10%) vs. 8 (40%)</p> <p><b>Stairs:</b><br/>Diclofenac: 26 (84%) vs. 21 (68%)<br/>Placebo: 18 (90%) vs. 16 (80%)</p>                                                                                                                                                                                                  |

Table 6. RCT data not suitable for effect size calculation or combining with other data (hip and knee OA)

| Ref ID, Author, year | Study type       | Duration | Population Description | Treatment given to relevant population                                   | Results                                                                                                                                                 |
|----------------------|------------------|----------|------------------------|--------------------------------------------------------------------------|---------------------------------------------------------------------------------------------------------------------------------------------------------|
| [7134, Yocum, 2000]  | Double blind RCT | 12 weeks | OA of hip or knee      | <p>Meloxicam 7.5mg PO QD (n=153)</p> <p>Meloxicam 15mg PO QD (n=156)</p> | <p><b>WOMAC pain (change from baseline)</b><br/>Meloxicam 7.5mg = -3.4<br/>Meloxicam 15mg = -14.5<br/>Diclofenac 50mg bid = -4.5<br/>Placebo = -2.2</p> |

|                            |                                  |         |                      |                                                                                            |                                                                                                                                                                                                                                                                                                                                                                                                    |
|----------------------------|----------------------------------|---------|----------------------|--------------------------------------------------------------------------------------------|----------------------------------------------------------------------------------------------------------------------------------------------------------------------------------------------------------------------------------------------------------------------------------------------------------------------------------------------------------------------------------------------------|
|                            |                                  |         |                      | Diclofenac 50mg PO BID<br>(n=152)<br><br>Placebo<br>(n=155)                                | <b>WOMAC function (change from baseline)</b><br>Meloxicam 7.5mg = -10.4<br>Meloxicam 15mg = -12.6<br>Diclofenac 50mg bid = -14.9<br>Placebo = -7.2                                                                                                                                                                                                                                                 |
| [7041,<br>Garner,<br>2005] | Cochrane<br>Systematic<br>Review | 6 weeks | OA of hip or<br>knee | Rofecoxib 12.5mg<br>Rofecoxib 25mg<br>Rofecoxib 125mg<br>Placebo                           | <b>SAE</b><br>Rofecoxib 12.5mg 6 weeks<br>3 RCTs with 1388 participants<br>Risk Ratio (M-H, Fixed, 95% CI)<br>Effect Size 3.95 [1.06, 14.63]<br><br>Rofecoxib 25mg<br>4 RCTs with 658 participants<br>Risk Ratio (M-H, Fixed, 95% CI)<br>Effect Size 0.47 [0.11, 2.08]<br><br>Rofecoxib 125mg<br>1 RCT with 146 participants<br>Risk Ratio (M-H, Fixed, 95% CI)<br>Effect Size 6.81 [0.36, 129.61] |
| [3662,<br>Zhao,<br>1999]   | Double<br>blind RCT              | 12 week | OA of knee           | Celecoxib 100mg bid<br>(n=197)<br><br>Naproxen 500mg bid<br>(n=198)<br><br>Placebo (n=203) | <b>WOMAC pain (change from baseline)</b><br>Celecoxib 100mg bid = -3.1<br>Naproxen 500mg bid = -2.4<br>Placebo = -1.2<br><br><b>WOMAC function (change from baseline)</b><br>Celecoxib 100mg bid = -9.5<br>Naproxen 500mg bid = -7.8<br>Placebo = -3.9                                                                                                                                             |

## References

1. Famaey JP, Colinet E. A double-blind trial of ketoprofen in the treatment of osteoarthritis of the hip. *Rheumatol Rehabil.* 1976;Suppl:45-49.
2. Schnitzer TJ, Dattani ID, Seriola B, Schneider H, Moore A, Tseng L, et al. A 13-week, multicenter, randomized, double-blind study of lumiracoxib in hip osteoarthritis. *Clin Rheumatol.* 2011;30(11):1433-1446.
3. Baerwald C, Verdecchia P, Duquesroix B, Frayssinet H, Ferreira T. Efficacy, safety, and effects on blood pressure of naproxen 750 mg twice daily compared with placebo and naproxen 500 mg twice daily in patients with osteoarthritis of the hip: a randomized, double-blind, parallel-group, multicenter study. *Arthritis Rheum.* 2010;62(12):3635-3644.
4. Golden HE, Moskowitz RW, Minic M. Analgesic efficacy and safety of nonprescription doses of naproxen sodium compared with acetaminophen in the treatment of osteoarthritis of the knee. *Am J Ther.* 2004;11(2):85-94.
5. Kivitz AJ, Moskowitz RW, Woods E, Hubbard RC, Verburg KM, Lefkowitz JB, et al. Comparative efficacy and safety of celecoxib and naproxen in the treatment of osteoarthritis of the hip. *J Int Med Res.* 2001;29(6):467-479.
6. Mejjad O, Favre S, Dujardin F, Thomine J, Le Loet X, Weber J. Efficacy of etodolac on gait in hip osteoarthritis as assessed by Bessou's locometer: a randomized, crossover, double-blind study versus placebo. *Groupe de Recherche sur le Handicap de L'appareil Locomoteur. Osteoarthritis Cartilage.* 2000;8(3):230-235.
7. Quiding H, Grimstad J, Rusten K, Stubhaug A, Bremnes J, Breivik H. Ibuprofen plus codeine, ibuprofen, and placebo in a single- and multidose cross-over comparison for coxarthrosis pain. *Pain.* 1992;50(3):303-307.
8. Hodgkinson R, Woolf D. A five-year clinical trial of indomethacin in osteoarthritis of the hip. *Practitioner.* 1973;210(257):392-396.
9. Gibofsky A, Williams GW, McKenna F, Fort JG. Comparing the efficacy of cyclooxygenase 2-specific inhibitors in treating osteoarthritis: appropriate trial design considerations and results of a randomized, placebo-controlled trial. *Arthritis Rheum.* 2003;48(11):3102-3111.
10. Williams GW, Hubbard RC, Yu SS, Zhao W, Geis GS. Comparison of once-daily and twice-daily administration of celecoxib for the treatment of osteoarthritis of the knee. *Clin Ther.* 2001;23(2):213-227.
11. Essex MN, O'Connell MA, Behar R, Bao W. Efficacy and safety of nonsteroidal anti-inflammatory drugs in Asian patients with knee osteoarthritis: summary of a randomized, placebo-controlled study. *Int J Rheum Dis.* 2016;19(3):262-270.
12. Birbara C, Ruoff G, Sheldon E, Valenzuela C, Rodgers A, Petruschke RA, et al. Efficacy and safety of rofecoxib 12.5 mg and celecoxib 200 mg in two similarly designed osteoarthritis studies. *Curr Med Res Opin.* 2006;22(1):199-210.
13. Essex MN, Behar R, O'Connell MA, Brown PB. Efficacy and tolerability of celecoxib and naproxen versus placebo in Hispanic patients with knee osteoarthritis. *Int J Gen Med.* 2014;7:227-235.
14. Wittenberg RH, Schell E, Krehan G, Maeumbaed R, Runge H, Schluter P, et al. First-dose analgesic effect of the cyclooxygenase-2 selective inhibitor lumiracoxib in osteoarthritis of the knee: a randomized, double-blind, placebo-controlled comparison with celecoxib [NCT00267215]. *Arthritis Res Ther.* 2006;8(2):R35.

15. Essex MN, O'Connell M, Bhadra Brown P. Response to nonsteroidal anti-inflammatory drugs in African Americans with osteoarthritis of the knee. *J Int Med Res.* 2012;40(6):2251-2266.
16. McKenna F, Borenstein D, Wendt H, Wallemark C, Lefkowitz JB, Geis GS. Celecoxib versus diclofenac in the management of osteoarthritis of the knee. *Scand J Rheumatol.* 2001;30(1):11-18.
17. Williams GW, Ettlinger RE, Ruderman EM, Hubbard RC, Lonien ME, Yu SS, et al. Treatment of osteoarthritis with a once-daily dosing regimen of celecoxib: a randomized, controlled trial. *J Clin Rheumatol.* 2000;6(2):65-74.
18. Schnitzer TJ, Beier J, Geusens P, Hasler P, Patel SK, Senftleber I, et al. Efficacy and safety of four doses of lumiracoxib versus diclofenac in patients with knee or hip primary osteoarthritis: a phase II, four-week, multicenter, randomized, double-blind, placebo-controlled trial. *Arthritis Rheum.* 2004;51(4):549-557.
19. Ghosh S, Paul S, Das N, Bhattacharyya TK. A study on the effects of diclofenac sodium and etoricoxib in the treatment of osteoarthritis. *J Indian Med Assoc.* 2007;105(5):260-262.
20. Paul S, Das N, Ghosh S. The effects of aceclofenac and nabumetone in osteoarthritis. *JNMA J Nepal Med Assoc.* 2009;48(174):121-125.
21. Case JP, Baliunas AJ, Block JA. Lack of efficacy of acetaminophen in treating symptomatic knee osteoarthritis: a randomized, double-blind, placebo-controlled comparison trial with diclofenac sodium. *Arch Intern Med.* 2003;163(2):169-178.
22. Bingham CO, 3rd, Sebba AI, Rubin BR, Ruoff GE, Kremer J, Bird S, et al. Efficacy and safety of etoricoxib 30 mg and celecoxib 200 mg in the treatment of osteoarthritis in two identically designed, randomized, placebo-controlled, non-inferiority studies. *Rheumatology (Oxford).* 2007;46(3):496-507.
23. Bensen WG, Fiechtner JJ, McMillen JI, Zhao WW, Yu SS, Woods EM, et al. Treatment of osteoarthritis with celecoxib, a cyclooxygenase-2 inhibitor: a randomized controlled trial. *Mayo Clin Proc.* 1999;74(11):1095-1105.
24. Fleischmann R, Sheldon E, Maldonado-Cocco J, Dutta D, Yu S, Sloan VS. Lumiracoxib is effective in the treatment of osteoarthritis of the knee: a prospective randomized 13-week study versus placebo and celecoxib. *Clin Rheumatol.* 2006;25(1):42-53.
25. DeLemos BP, Xiang J, Benson C, Gana TJ, Pascual ML, Rosanna R, et al. Tramadol hydrochloride extended-release once-daily in the treatment of osteoarthritis of the knee and/or hip: a double-blind, randomized, dose-ranging trial. *Am J Ther.* 2011;18(3):216-226.
26. Sheldon E, Beaulieu A, Paster Z, Dutta D, Yu S, Sloan VS. Efficacy and tolerability of lumiracoxib in the treatment of osteoarthritis of the knee: a 13-week, randomized, double-blind comparison with celecoxib and placebo. *Clin Ther.* 2005;27(1):64-77.
27. Lehmann R, Brzosko M, Kopsa P, Nischik R, Kreisse A, Thurston H, et al. Efficacy and tolerability of lumiracoxib 100 mg once daily in knee osteoarthritis: a 13-week, randomized, double-blind study vs. placebo and celecoxib. *Curr Med Res Opin.* 2005;21(4):517-526.

28. Tannenbaum H, Berenbaum F, Reginster JY, Zacher J, Robinson J, Poor G, et al. Lumiracoxib is effective in the treatment of osteoarthritis of the knee: a 13 week, randomised, double blind study versus placebo and celecoxib. *Ann Rheum Dis*. 2004;63(11):1419-1426.
29. Clegg DO, Reda DJ, Harris CL, Klein MA, O'Dell JR, Hooper MM, et al. Glucosamine, chondroitin sulfate, and the two in combination for painful knee osteoarthritis. *N Engl J Med*. 2006;354(8):795-808.
30. Schnitzer TJ, Tesser JR, Cooper KM, Altman RD. A 4-week randomized study of acetaminophen extended-release vs rofecoxib in knee osteoarthritis. *Osteoarthritis Cartilage*. 2009;17(1):1-7.
31. Schnitzer TJ, Hochberg MC, Marrero CE, Duquesroix B, Frayssinet H, Beekman M. Efficacy and safety of naproxen in patients with osteoarthritis of the knee: a 53-week prospective randomized multicenter study. *Semin Arthritis Rheum*. 2011;40(4):285-297.
32. Ekman EF, Gimbel JS, Bello AE, Smith MD, Keller DS, Annis KM, et al. Efficacy and safety of intravenous tanezumab for the symptomatic treatment of osteoarthritis: 2 randomized controlled trials versus naproxen. *J Rheumatol*. 2014;41(11):2249-2259.
33. Gordo AC, Walker C, Armada B, Zhou D. Efficacy of celecoxib versus ibuprofen for the treatment of patients with osteoarthritis of the knee: A randomized double-blind, non-inferiority trial. *J Int Med Res*. 2017;45(1):59-74.
34. Sandelin J, Harilainen A, Crone H, Hamberg P, Forsskahl B, Tamelander G. Local NSAID gel (eltenac) in the treatment of osteoarthritis of the knee. A double blind study comparing eltenac with oral diclofenac and placebo gel. *Scand J Rheumatol*. 1997;26(4):287-292.
35. Petersen SG, Beyer N, Hansen M, Holm L, Aagaard P, Mackey AL, et al. Nonsteroidal anti-inflammatory drug or glucosamine reduced pain and improved muscle strength with resistance training in a randomized controlled trial of knee osteoarthritis patients. *Arch Phys Med Rehabil*. 2011;92(8):1185-1193.
36. Lee P, Davis P, Prat A. The efficacy of diflunisal in osteoarthritis of the knee. A Canadian Multicenter Study. *J Rheumatol*. 1985;12(3):544-548.
37. Pincus T, Koch G, Lei H, Mangal B, Sokka T, Moskowitz R, et al. Patient Preference for Placebo, Acetaminophen (paracetamol) or Celecoxib Efficacy Studies (PACES): two randomised, double blind, placebo controlled, crossover clinical trials in patients with knee or hip osteoarthritis. *Ann Rheum Dis*. 2004;63(8):931-939.
38. Kivitz A, Eisen G, Zhao WW, Bevirt T, Recker DP. Randomized placebo-controlled trial comparing efficacy and safety of valdecoxib with naproxen in patients with osteoarthritis. *J Fam Pract*. 2002;51(6):530-537.
39. Cryer BL, Sostek MB, Fort JG, Svensson O, Hwang C, Hochberg MC. A fixed-dose combination of naproxen and esomeprazole magnesium has comparable upper gastrointestinal tolerability to celecoxib in patients with osteoarthritis of the knee: results from two randomized, parallel-group, placebo-controlled trials. *Ann Med*. 2011;43(8):594-605.
40. Lund B, Distel M, Bluhmki E. A double-blind, randomized, placebo-controlled study of efficacy and tolerance of meloxicam treatment in patients with osteoarthritis of the knee. *Scand J Rheumatol*. 1998;27(1):32-37.

41. Dore R, Ballard I, Constantine G, McDonald P. Efficacy and safety of etodolac and naproxen in patients with osteoarthritis of the knee: a double-blind, placebo-controlled study. *Clin Ther.* 1995;17(4):656-666.
42. Schiff M, Minic M. Comparison of the analgesic efficacy and safety of nonprescription doses of naproxen sodium and Ibuprofen in the treatment of osteoarthritis of the knee. *J Rheumatol.* 2004;31(7):1373-1383.
43. Kivitz AJ, Greenwald MW, Cohen SB, Polis AB, Najarian DK, Dixon ME, et al. Efficacy and safety of rofecoxib 12.5 mg versus nabumetone 1,000 mg in patients with osteoarthritis of the knee: a randomized controlled trial. *J Am Geriatr Soc.* 2004;52(5):666-674.
44. Mayorga AJ, Flores CM, Trudeau JJ, Moyer JA, Shalayda K, Dale M, et al. A randomized study to evaluate the analgesic efficacy of a single dose of the TRPV1 antagonist mavatrep in patients with osteoarthritis. *Scand J Pain.* 2017;17:134-143.
45. Sawitzke AD, Shi H, Finco MF, Dunlop DD, Harris CL, Singer NG, et al. Clinical efficacy and safety of glucosamine, chondroitin sulphate, their combination, celecoxib or placebo taken to treat osteoarthritis of the knee: 2-year results from GAIT. *Ann Rheum Dis.* 2010;69(8):1459-1464.
46. Huggins JP, Smart TS, Langman S, Taylor L, Young T. An efficient randomised, placebo-controlled clinical trial with the irreversible fatty acid amide hydrolase-1 inhibitor PF-04457845, which modulates endocannabinoids but fails to induce effective analgesia in patients with pain due to osteoarthritis of the knee. *Pain.* 2012;153(9):1837-1846.
47. Peeva E, Beals CR, Bolognese JA, Kivitz AJ, Taber L, Harman A, et al. A walking model to assess the onset of analgesia in osteoarthritis knee pain. *Osteoarthritis Cartilage.* 2010;18(5):646-653.
48. Schnitzer TJ, Weaver AL, Polis AB, Petruschke RA, Geba GP, Vact, et al. Efficacy of rofecoxib, celecoxib, and acetaminophen in patients with osteoarthritis of the knee. A combined analysis of the VACT studies. *J Rheumatol.* 2005;32(6):1093-1105.
49. McKenna F, Weaver A, Fiechtner JJ, Bello AE, Fort JG. COX-2 specific inhibitors in the management of osteoarthritis of the knee: a placebo-controlled, randomized, double-blind study. *J Clin Rheumatol.* 2001;7(3):151-159.
50. Scott DL, Berry H, Capell H, Coppock J, Daymond T, Doyle DV, et al. The long-term effects of non-steroidal anti-inflammatory drugs in osteoarthritis of the knee: a randomized placebo-controlled trial. *Rheumatology (Oxford).* 2000;39(10):1095-1101.
51. Simon LS, Lanza FL, Lipsky PE, Hubbard RC, Talwalker S, Schwartz BD, et al. Preliminary study of the safety and efficacy of SC-58635, a novel cyclooxygenase 2 inhibitor: efficacy and safety in two placebo-controlled trials in osteoarthritis and rheumatoid arthritis, and studies of gastrointestinal and platelet effects. *Arthritis Rheum.* 1998;41(9):1591-1602.
52. Makarowski W, Weaver A, Rubin B, Caldwell J, McMahan FG, Noveck RJ, et al. The efficacy, tolerability, and safety of 1200 mg/d of oxaprozin and 1500 mg/d of nabumetone in the treatment of patients with osteoarthritis of the knee. *Clin Ther.* 1996;18(1):114-124.
53. Dieppe P, Cushnaghan J, Jasani MK, McCrae F, Watt I. A two-year, placebo-controlled trial of non-steroidal anti-inflammatory therapy in osteoarthritis of the knee joint. *Br J Rheumatol.* 1993;32(7):595-600.

54. White WB, Schnitzer TJ, Bakris GL, Frayssinet H, Duquesroix B, Weber M. Effects of naproxen on blood pressure in patients with osteoarthritis. *Am J Cardiol.* 2011;107(9):1338-1345.
55. Altman R, Hochberg M, Gibofsky A, Jaros M, Young C. Efficacy and safety of low-dose SoluMatrix meloxicam in the treatment of osteoarthritis pain: a 12-week, phase 3 study. *Curr Med Res Opin.* 2015;31(12):2331-2343.
56. Gibofsky A, Hochberg MC, Jaros MJ, Young CL. Efficacy and safety of low-dose submicron diclofenac for the treatment of osteoarthritis pain: a 12 week, phase 3 study. *Curr Med Res Opin.* 2014;30(9):1883-1893.
57. Leung AT, Malmstrom K, Gallacher AE, Sarembock B, Poor G, Beaulieu A, et al. Efficacy and tolerability profile of etoricoxib in patients with osteoarthritis: A randomized, double-blind, placebo and active-comparator controlled 12-week efficacy trial. *Curr Med Res Opin.* 2002;18(2):49-58.
58. Svensson O, Malmenas M, Fajutrao L, Roos EM, Lohmander LS. Greater reduction of knee than hip pain in osteoarthritis treated with naproxen, as evaluated by WOMAC and SF-36. *Ann Rheum Dis.* 2006;65(6):781-784.
59. Strand V, Bergman M, Singh JA, Gibofsky A, Kivitz A, Young C. Low-dose SoluMatrix diclofenac in patients with osteoarthritis pain: impact on quality of life in a controlled trial. *Clin Rheumatol.* 2017;36(6):1357-1367.
60. Puopolo A, Boice JA, Fidelholtz JL, Littlejohn TW, Miranda P, Berrocal A, et al. A randomized placebo-controlled trial comparing the efficacy of etoricoxib 30 mg and ibuprofen 2400 mg for the treatment of patients with osteoarthritis. *Osteoarthritis Cartilage.* 2007;15(12):1348-1356.
61. Day R, Morrison B, Luza A, Castaneda O, Strusberg A, Nahir M, et al. A randomized trial of the efficacy and tolerability of the COX-2 inhibitor rofecoxib vs ibuprofen in patients with osteoarthritis. Rofecoxib/Ibuprofen Comparator Study Group. *Arch Intern Med.* 2000;160(12):1781-1787.
62. Bolnot-Delmas D, Buch JP, Zeidler H, Dougados M. Ro 15-8081 in osteoarthritis of hip and knee: a double-blind placebo-controlled multicentre dose-ranging study on analgesia. *Pain.* 1996;64(1):99-105.
63. Smugar SS, Schnitzer TJ, Weaver AL, Rubin BR, Polis AB, Tershakovec AM. Rofecoxib 12.5 mg, rofecoxib 25 mg, and celecoxib 200 mg in the treatment of symptomatic osteoarthritis: results of two similarly designed studies. *Curr Med Res Opin.* 2006;22(7):1353-1367.
64. Saag K, van der Heijde D, Fisher C, Samara A, DeTora L, Bolognese J, et al. Rofecoxib, a new cyclooxygenase 2 inhibitor, shows sustained efficacy, comparable with other nonsteroidal anti-inflammatory drugs: a 6-week and a 1-year trial in patients with osteoarthritis. Osteoarthritis Studies Group. *Arch Fam Med.* 2000;9(10):1124-1134.
65. Yocum D, Fleischmann R, Dalgin P, Caldwell J, Hall D, Roszko P. Safety and efficacy of meloxicam in the treatment of osteoarthritis: a 12-week, double-blind, multiple-dose, placebo-controlled trial. The Meloxicam Osteoarthritis Investigators. *Arch Intern Med.* 2000;160(19):2947-2954.
66. Garner SE, Fidan DD, Frankish R, Maxwell L. Rofecoxib for osteoarthritis. *Cochrane Database Syst Rev.* 2005(1):CD005115.

67. Zhao SZ, McMillen JJ, Markenson JA, Dedhiya SD, Zhao WW, Osterhaus JT, et al. Evaluation of the functional status aspects of health-related quality of life of patients with osteoarthritis treated with celecoxib. *Pharmacotherapy*. 1999;19(11):1269-1278.
68. Reginster J, Dudler J, Blicharski T, Pavelka K. Pharmaceutical-grade chondroitin sulfate is as effective as celecoxib and superior to placebo in symptomatic knee osteoarthritis: The chondroitin vs celecoxib vs placebo trial (CONCEPT). *Ann Rheum Dis* 2017;0:1-7.
69. Asmus MJ, Essex MN, Brown PB, Mallen SR. Efficacy and tolerability of celecoxib in osteoarthritis patients who previously failed naproxen and ibuprofen: Results from two trials. *Int J Clin Rheumatol* 2014;9:551-558.
70. Hochberg MC, Fort JG, Svensson O, Hwang C, Sostek M. Fixed-dose combination of enteric-coated naproxen and immediate-release esomeprazole has comparable efficacy to celecoxib for knee osteoarthritis: two randomized trials. *Curr Med Res Opin* 2011;27:1243-1253.
71. Bocanegra TS, Weaver AL, Tindall EA, Sikes DH, Ball JA, Wallemark CB, et al. Diclofenac/misoprostol compared with diclofenac in the treatment of osteoarthritis of the knee or hip: a randomized, placebo controlled trial. Arthrotec Osteoarthritis Study Group. *J Rheumatol* 1998;25:1602-1611.
72. Trudeau J, Van Inwegen R, Eaton T, Bhat G, Paillard F, Ng D, et al. Assessment of pain and activity using an electronic pain diary and actigraphy device in a randomized, placebo-controlled crossover trial of celecoxib in osteoarthritis of the knee. *Pain Practice* 2015; 15:247-255.

**PICO 57: Acetaminophen vs. no treatment for people with knee and/or hip OA.**

Summary: The literature search identified 7 RCTs to evaluate this PICO question. Four RCTs<sup>[1-3,7]</sup> were conducted in adults with symptomatic knee OA and three RCTs<sup>[4-6]</sup> were conducted in adults with knee or hip OA. Follow-up ranged from eight days to 24 weeks. Four studies<sup>[3-6]</sup> observed that participants in the acetaminophen group had greater improvements in pain (WOMAC Pain and 100mm VAS) than the placebo group with knee or hip OA. Micelli-Richard et al.<sup>[2]</sup> found no between-group difference in either pain or self-reported function. Findings of self-reported function were inconsistent between studies. Altman et al.<sup>[5]</sup> and Prior et al.<sup>[4]</sup> found greater improvements in self-reported function in the acetaminophen group, while conversely Case et al.<sup>[3]</sup> reported improvements favoring the placebo group, but results were imprecise due to wide confidence intervals and small study size. However, combined data analysis found a significant between-group difference in WOMAC function improvement favoring acetaminophen. The risk of serious adverse events overall and hepatotoxicity in particular was observed to be greater in the acetaminophen group, but the findings were inconclusive due to wide confidence intervals that cross the line of no effect. The quality of evidence was low, due primarily to variations in the magnitude of effects across studies and wide confidence intervals associated with



the effect estimates. A literature search update in August 2018 identified two additional relevant RCTs<sup>[8,9]</sup> that did not alter the findings in the table below.

Quality of evidence across all critical outcomes: Low

| <b>Acetaminophen compared to placebo for hip and knee OA</b>                                        |                      |                      |                     |                    |                         |                                      |                              |                           |                                 |                                     |                                                                                        |
|-----------------------------------------------------------------------------------------------------|----------------------|----------------------|---------------------|--------------------|-------------------------|--------------------------------------|------------------------------|---------------------------|---------------------------------|-------------------------------------|----------------------------------------------------------------------------------------|
| <b>Certainty assessment</b>                                                                         |                      |                      |                     |                    |                         |                                      | <b>Summary of findings</b>   |                           |                                 |                                     |                                                                                        |
| <b>Nº of participants (studies) Follow-up</b>                                                       | <b>Risk of bias</b>  | <b>Inconsistency</b> | <b>Indirectness</b> | <b>Imprecision</b> | <b>Publication bias</b> | <b>Overall certainty of evidence</b> | <b>Study event rates (%)</b> |                           | <b>Relative effect (95% CI)</b> | <b>Anticipated absolute effects</b> |                                                                                        |
|                                                                                                     |                      |                      |                     |                    |                         |                                      | <b>With placebo</b>          | <b>With acetaminophen</b> |                                 | <b>Risk with placebo</b>            | <b>Risk difference with acetaminophen</b>                                              |
| <b>WOMAC Pain subscale (Likert) 12 wks to 24 wks (lower scores indicate improvement)</b>            |                      |                      |                     |                    |                         |                                      |                              |                           |                                 |                                     |                                                                                        |
| 1136 (4 RCTs)                                                                                       | serious <sup>a</sup> | not serious          | not serious         | not serious        | none                    | ⊕⊕⊕○<br>MODERATE                     | 468                          | 456                       | -                               | -                                   | SMD <b>0.2 lower</b><br>(0.31 lower to 0.08 lower)<br><br><b>Favors acetaminophen</b>  |
| <b>WOMAC Function subscale (Likert/100mm), &lt;12 wks (lower scores indicate improvement)</b>       |                      |                      |                     |                    |                         |                                      |                              |                           |                                 |                                     |                                                                                        |
| 779 (1 RCT)                                                                                         | serious <sup>b</sup> | not serious          | not serious         | not serious        | none                    | ⊕⊕⊕○<br>MODERATE                     | 374                          | 405                       | -                               | -                                   | SMD <b>0</b><br>(0.14 lower to 0.14 higher)                                            |
| <b>WOMAC Function subscale (Likert/100mm), 12 wks to 24 wks (lower scores indicate improvement)</b> |                      |                      |                     |                    |                         |                                      |                              |                           |                                 |                                     |                                                                                        |
| 1136 (4 RCTs)                                                                                       | serious <sup>a</sup> | not serious          | not serious         | not serious        | none                    | ⊕⊕⊕○<br>MODERATE                     | 468                          | 456                       | -                               | -                                   | SMD <b>0.23 lower</b><br>(0.36 lower to 0.11 lower)<br><br><b>Favors acetaminophen</b> |
| <b>Global pain (100mm VAS) (lower scores indicate improvement)</b>                                  |                      |                      |                     |                    |                         |                                      |                              |                           |                                 |                                     |                                                                                        |

| Acetaminophen compared to placebo for hip and knee OA       |                      |             |             |                      |      |             |                     |                |                                      |                 |                                                                                     |  |
|-------------------------------------------------------------|----------------------|-------------|-------------|----------------------|------|-------------|---------------------|----------------|--------------------------------------|-----------------|-------------------------------------------------------------------------------------|--|
| Certainty assessment                                        |                      |             |             |                      |      |             | Summary of findings |                |                                      |                 |                                                                                     |  |
| 1489<br>(3 RCTs)                                            | serious <sup>b</sup> | not serious | not serious | serious <sup>c</sup> | none | ⊕⊕○○<br>LOW | 728                 | 761            | -                                    | -               | SMD <b>0.16</b><br><b>lower</b><br>(0.34 lower to<br>0.03 higher)                   |  |
| <b>Hepatic transaminases exceeded 3 x ULN</b>               |                      |             |             |                      |      |             |                     |                |                                      |                 |                                                                                     |  |
| 867<br>(2 RCTs)                                             | serious <sup>d</sup> | not serious | not serious | serious <sup>e</sup> | none | ⊕⊕○○<br>LOW | 1/440<br>(0.2%)     | 10/427 (2.3%)  | <b>OR 7.37</b><br>(1.32 to<br>41.00) | 2 per<br>1,000  | <b>14 more per<br/>1,000</b><br>(1 more to 83<br>more)<br><br><b>Favors placebo</b> |  |
| <b>Total number of patients with serious adverse events</b> |                      |             |             |                      |      |             |                     |                |                                      |                 |                                                                                     |  |
| 3354<br>(7 RCTs)                                            | serious <sup>b</sup> | not serious | not serious | serious <sup>c</sup> | none | ⊕⊕○○<br>LOW | 21/1531<br>(1.4%)   | 30/1611 (1.9%) | <b>OR 1.30</b><br>(0.76 to<br>2.21)  | 14 per<br>1,000 | <b>5 more per<br/>1,000</b><br>(3 fewer to 20<br>more)                              |  |

**CI:** Confidence interval; **SMD:** Standardised mean difference; **OR:** Odds ratio

## Explanations

- 2/3 studies had lack of clarity about blinding of assessors and allocation concealment, and high attrition.
- Randomization methods not described, lack of clarity about blinding of assessors and allocation concealment.
- Wide 95% CI that crosses line of no effect.
- 1/2 studies had lack of clarity about blinding of assessors and allocation concealment, and randomization methods not described.
- Wide 95% CI and small number of events

## References

1. Golden HE, Moskowitz RW, Minic M. Analgesic efficacy and safety of nonprescription doses of naproxen sodium compared with acetaminophen in the treatment of osteoarthritis of the knee. *Am J Ther.* 2004;11(2):85-94.
2. Miceli-Richard C, Le Bars M, Schmidely N, Dougados M. Paracetamol in osteoarthritis of the knee. *Ann Rheum Dis.* 2004;63(8):923-930.
3. Case JP, Baliunas AJ, Block JA. Lack of efficacy of acetaminophen in treating symptomatic knee osteoarthritis: a randomized, double-blind, placebo-controlled comparison trial with diclofenac sodium. *Arch Intern Med.* 2003;163(2):169-178.
4. Prior MJ, Harrison DD, Frustaci ME. A randomized, double-blind, placebo-controlled 12 week trial of acetaminophen extended release for the treatment of signs and symptoms of osteoarthritis. *Curr Med Res Opin.* 2014;30(11):2377-2387.
5. Altman RD, Zinsenheim JR, Temple AR, Schweinle JE. Three-month efficacy and safety of acetaminophen extended-release for osteoarthritis pain of the hip or knee: a randomized, double-blind, placebo-controlled study. *Osteoarthritis Cartilage.* 2007;15(4):454-461.
6. Pincus T, Koch G, Lei H, Mangal B, Sokka T, Moskowitz R, et al. Patient Preference for Placebo, Acetaminophen (paracetamol) or Celecoxib Efficacy Studies (PACES): two randomised, double blind, placebo controlled, crossover clinical trials in patients with knee or hip osteoarthritis. *Ann Rheum Dis.* 2004;63(8):931-939.
7. Herrero-Beaumont, G., Ivorra, J. A., Del Carmen Trabado, M., Blanco, F. J., Benito, P., Martin-Mola, E., . . . Branco, J. (2007). Glucosamine sulfate in the treatment of knee osteoarthritis symptoms: a randomized, double-blind, placebo-controlled study using acetaminophen as a side comparator. *Arthritis Rheum*, 56(2), 555-567.
8. Reed K, Collaku A, Moreira S. Efficacy and safety of twice daily sustained-release paracetamol formulation for osteoarthritis pain of the knee or hip: a randomized, double-blind, placebo-controlled, twelve-week study. *Curr Med Res Opin.* 2018 Apr;34(4):689-699.
9. Yue Y, Collaku A. Correlation of Pain Reduction with fMRI BOLD Response in Osteoarthritis Patients Treated with Paracetamol: Randomized, Double-Blind, Crossover Clinical Efficacy Study. *Pain Med.* 2018 Feb 1;19(2):355-367.

**PICO 58: Bisphosphonates vs. no treatment for OA hip/knee**

Summary. This PICO was addressed by 4 RCTs <sup>[1-4]</sup>. They showed no significant difference in WOMAC pain and function. VAS pain showed a significant improvement favoring bisphosphonate over no treatment; however, it was a small study with a wide CI.

Quality of evidence across all critical outcomes: Moderate

**Table 1. Bisphosphonates compared to Placebo for OA of hip or knee**

| <b>Table 1. Bisphosphonates compared to Placebo for OA of hip or knee</b>                                |                      |                      |                     |                      |                         |                                      |                            |                             |                                 |                                     |                                                                                        |
|----------------------------------------------------------------------------------------------------------|----------------------|----------------------|---------------------|----------------------|-------------------------|--------------------------------------|----------------------------|-----------------------------|---------------------------------|-------------------------------------|----------------------------------------------------------------------------------------|
| <b>Certainty assessment</b>                                                                              |                      |                      |                     |                      |                         |                                      | <b>Summary of findings</b> |                             |                                 |                                     |                                                                                        |
| <b>No of participants (studies) Follow-up</b>                                                            | <b>Risk of bias</b>  | <b>Inconsistency</b> | <b>Indirectness</b> | <b>Imprecision</b>   | <b>Publication bias</b> | <b>Overall certainty of evidence</b> | <b>Number of Patients</b>  |                             | <b>Relative effect (95% CI)</b> | <b>Anticipated absolute effects</b> |                                                                                        |
|                                                                                                          |                      |                      |                     |                      |                         |                                      | <b>With Placebo</b>        | <b>With Bisphosphonates</b> |                                 | <b>Risk with Placebo</b>            | <b>Risk difference with Bisphosphonates</b>                                            |
| <b>WOMAC pain (change from baseline) &gt;/= 12 months (lower scores indicate improvement)</b>            |                      |                      |                     |                      |                         |                                      |                            |                             |                                 |                                     |                                                                                        |
| 1010 (2 RCTs)                                                                                            | serious <sup>a</sup> | serious <sup>b</sup> | not serious         | not serious          | none                    | ⊕⊕⊕○<br>MODERATE                     | 487                        | 523                         | -                               | -                                   | <b>SMD 0.07 lower</b><br>(0.28 lower to 0.13 higher)                                   |
| <b>VAS pain (6 months) (0-100, lower scores indicate improvement)</b>                                    |                      |                      |                     |                      |                         |                                      |                            |                             |                                 |                                     |                                                                                        |
| 59 (1 RCT)                                                                                               | not serious          | not serious          | not serious         | serious <sup>c</sup> | none                    | ⊕⊕⊕○<br>MODERATE                     | 28                         | 31                          | -                               | -                                   | <b>MD 15 lower</b><br>(29.35 lower to 0.65 lower)<br><br><b>Favors bisphosphonates</b> |
| <b>WOMAC function (change from baseline) &gt;/= 12 months (0-100, lower scores indicate improvement)</b> |                      |                      |                     |                      |                         |                                      |                            |                             |                                 |                                     |                                                                                        |
| 968 (1 RCT)                                                                                              | serious <sup>d</sup> | not serious          | not serious         | not serious          | none                    | ⊕⊕⊕○<br>MODERATE                     | 475                        | 493                         | -                               | -                                   | <b>MD 0.52 higher</b><br>(2.38 lower to 3.42 higher)                                   |

**CI:** Confidence interval; **SMD:** Standardised mean difference; **MD:** Mean difference

### Explanations

- a. Neither RCT provided information on randomization method or allocation concealment, and they provided no information or incomplete information on blinding.
- b. High I<sup>2</sup> due to study effect sizes in different directions
- c. Small study with wide 95% CI
- d. No information on randomization method, allocation concealment, or blinding of outcome assessors.

**Table 2. RCT data not suitable for effect size calculation or combining with other data**

| Ref ID, Author, year | Study type       | Duration | Population Description | Treatment given to relevant population               | Results                                                                                                                                                                       |
|----------------------|------------------|----------|------------------------|------------------------------------------------------|-------------------------------------------------------------------------------------------------------------------------------------------------------------------------------|
| 2218, Jokar, 2010    | Double blind RCT | 24 weeks | OA knee                | Alendronate 70mg/week<br>n=20<br><br>Placebo<br>N=19 | <b>WOMAC pain (change from baseline)</b><br>Alendronate = -2.4<br>Placebo = -2.9<br><br><b>WOMAC function (change from baseline)</b><br>Alendronate = -2.9<br>Placebo = -2.55 |

## References

1. Nishii T, Tamura S, Shiomi T, Yoshikawa H, Sugano N. Alendronate treatment for hip osteoarthritis: prospective randomized 2-year trial. *Clin Rheumatol.* 2013;32(12):1759-1766.
2. Bingham CO, 3rd, Buckland-Wright JC, Garnero P, Cohen SB, Dougados M, Adami S, et al. Risedronate decreases biochemical markers of cartilage degradation but does not decrease symptoms or slow radiographic progression in patients with medial compartment osteoarthritis of the knee: results of the two-year multinational knee osteoarthritis structural arthritis study. *Arthritis Rheum.* 2006;54(11):3494-3507.
3. Laslett LL, Dore DA, Quinn SJ, Boon P, Ryan E, Winzenberg TM, et al. Zoledronic acid reduces knee pain and bone marrow lesions over 1 year: a randomised controlled trial. *Ann Rheum Dis.* 2012;71(8):1322-1328.
4. Jokar M, Mirfeizi Z, Keyvanpajoh K. The effect of alendronate on symptoms of knee osteoarthritis: a randomized controlled trial. *Iran J Med Sci.* 2010;35(1):9-15.

## PICO 59: Duloxetine vs. no treatment in OA hip/knee

Summary. This PICO was addressed by 4 RCTs <sup>[1-4]</sup>. They showed a significant improvement in WOMAC pain and function favoring duloxetine over placebo. There was no difference in serious adverse events, although the wide 95% CI means that the possibility of a difference could not be

ruled out. A literature search update in August 2018 identified two additional relevant RCTs<sup>[5,6]</sup>; these studies did not alter the findings in the table below.

Quality of evidence across all critical outcomes: Moderate

| <b>Duloxetine compared to Placebo for OA hip or knee</b>        |                     |                      |                     |                    |                         |                                      |                            |                        |                                 |                                     |                                                                                |
|-----------------------------------------------------------------|---------------------|----------------------|---------------------|--------------------|-------------------------|--------------------------------------|----------------------------|------------------------|---------------------------------|-------------------------------------|--------------------------------------------------------------------------------|
| <b>Certainty assessment</b>                                     |                     |                      |                     |                    |                         |                                      | <b>Summary of findings</b> |                        |                                 |                                     |                                                                                |
| <b>Nº of participants (studies) Follow-up</b>                   | <b>Risk of bias</b> | <b>Inconsistency</b> | <b>Indirectness</b> | <b>Imprecision</b> | <b>Publication bias</b> | <b>Overall certainty of evidence</b> | <b>Number of Patients</b>  |                        | <b>Relative effect (95% CI)</b> | <b>Anticipated absolute effects</b> |                                                                                |
|                                                                 |                     |                      |                     |                    |                         |                                      | <b>With Placebo</b>        | <b>With Duloxetine</b> |                                 | <b>Risk with Placebo</b>            | <b>Risk difference with Duloxetine</b>                                         |
| <b>WOMAC Pain (0-20, lower scores indicate improvement)</b>     |                     |                      |                     |                    |                         |                                      |                            |                        |                                 |                                     |                                                                                |
| 878<br>(3 RCTs)                                                 | not serious         | not serious          | not serious         | not serious        | none                    | ⊕⊕⊕⊕<br>HIGH                         | 443                        | 435                    | -                               | -                                   | MD <b>1.41 lower</b><br>(2.38 lower to 0.45 lower)<br><b>Favors duloxetine</b> |
| <b>WOMAC Function (0-68, lower scores indicate improvement)</b> |                     |                      |                     |                    |                         |                                      |                            |                        |                                 |                                     |                                                                                |
| 1069<br>(3 RCTs)                                                | not serious         | not serious          | not serious         | not serious        | none                    | ⊕⊕⊕⊕<br>HIGH                         | 454                        | 615                    | -                               | -                                   | MD <b>3.83 lower</b><br>(6.1 lower to 1.56 lower)<br><b>Favors duloxetine</b>  |
| <b>SAE</b>                                                      |                     |                      |                     |                    |                         |                                      |                            |                        |                                 |                                     |                                                                                |

| Duloxetine compared to Placebo for OA hip or knee |             |             |             |                      |      |                     |                 |                 |                                  |              |                                                   |
|---------------------------------------------------|-------------|-------------|-------------|----------------------|------|---------------------|-----------------|-----------------|----------------------------------|--------------|---------------------------------------------------|
| Certainty assessment                              |             |             |             |                      |      | Summary of findings |                 |                 |                                  |              |                                                   |
| 894<br>(3 RCTs)                                   | not serious | not serious | not serious | serious <sup>a</sup> | none | ⊕⊕⊕○<br>MODERATE    | 8/450<br>(1.8%) | 6/444<br>(1.4%) | <b>OR 0.92</b><br>(0.30 to 2.81) | 18 per 1,000 | <b>1 fewer per 1,000</b><br>(12 fewer to 31 more) |

**CI:** Confidence interval; **MD:** Mean difference; **OR:** Odds ratio

## Explanations

a. Wide 95% CI crosses line of no effect

## References

1. Wang G, Bi L, Li X, Li Z, Zhao D, Chen J, et al. Efficacy and safety of duloxetine in Chinese patients with chronic pain due to osteoarthritis: a randomized, double-blind, placebo-controlled study. *Osteoarthritis Cartilage*. 2017;25(6):832-838.
2. Chappell AS, Desai D, Liu-Seifert H, Zhang S, Skljarevski V, Belenkov Y, et al. A double-blind, randomized, placebo-controlled study of the efficacy and safety of duloxetine for the treatment of chronic pain due to osteoarthritis of the knee. *Pain Pract*. 2011;11(1):33-41.
3. Chappell AS, Ossanna MJ, Liu-Seifert H, Iyengar S, Skljarevski V, Li LC, et al. Duloxetine, a centrally acting analgesic, in the treatment of patients with osteoarthritis knee pain: a 13-week, randomized, placebo-controlled trial. *Pain*. 2009;146(3):253-260.
4. Abou-Raya S, Abou-Raya A, Helmii M. Duloxetine for the management of pain in older adults with knee osteoarthritis: randomised placebo-controlled trial. *Age Ageing*. 2012;41(5):646-652.
5. Uchio Y, Enomoto H, Alev L, Kato Y, Ishihara H, Tsuji T, Ochiai T, Konno S. A randomized, double-blind, placebo-controlled Phase III trial of duloxetine in Japanese patients with knee pain due to osteoarthritis. *J Pain Res*. 2018;11:809-821.
6. Tétreault P, Baliki MN, Baria AT, Bauer WR, Schnitzer TJ, Apkarian AV. Inferring distinct mechanisms in the absence of subjective differences: Placebo and centrally acting analgesic underlie unique brain adaptations. *Hum Brain Mapp*. 2018;39(5):2210-2223.

## PICO 60. Other serotonin norepinephrine reuptake inhibitors compared to no treatment in patients with knee or hip OA

Summary. The literature searches did not identify any studies that addressed this question.

Quality of evidence across all critical outcomes: Very low

**PICO 61. Tricyclic antidepressants compared to no treatment in patients with knee or hip OA**

Summary. The literature searches did not identify any studies that addressed this question.

Quality of evidence across all critical outcomes: Very low

**PICO 62: Tramadol vs. no treatment in OA hip/knee**

Summary. This PICO was addressed by 8 RCTs [1-8]. They found a significant improvement in WOMAC pain, WOMAC function, and pain intensity in the tramadol group compared to the placebo group. Although there was no significant difference between the groups in regard to serious adverse events, the wide 95% CI around the summary effect size means that the possibility of a between-group difference could not be ruled out.

Quality of evidence across all critical outcomes: Moderate

| <b>Tramadol 100mg - 400mg daily compared to Placebo for patients with knee or hip OA</b> |                     |                      |                     |                    |                         |                                      |                            |                                          |                                 |                                     |                                                                                 |
|------------------------------------------------------------------------------------------|---------------------|----------------------|---------------------|--------------------|-------------------------|--------------------------------------|----------------------------|------------------------------------------|---------------------------------|-------------------------------------|---------------------------------------------------------------------------------|
| <b>Certainty assessment</b>                                                              |                     |                      |                     |                    |                         |                                      | <b>Summary of findings</b> |                                          |                                 |                                     |                                                                                 |
| <b>Nº of participants (studies) Follow-up</b>                                            | <b>Risk of bias</b> | <b>Inconsistency</b> | <b>Indirectness</b> | <b>Imprecision</b> | <b>Publication bias</b> | <b>Overall certainty of evidence</b> | <b>Number of Patients</b>  |                                          | <b>Relative effect (95% CI)</b> | <b>Anticipated absolute effects</b> |                                                                                 |
|                                                                                          |                     |                      |                     |                    |                         |                                      | <b>With Placebo</b>        | <b>With Tramadol 100mg - 400mg daily</b> |                                 | <b>Risk with Placebo</b>            | <b>Risk difference with Tramadol 100mg - 400mg daily</b>                        |
| <b>WOMAC Pain (0-20, lower scores indicate improvement)</b>                              |                     |                      |                     |                    |                         |                                      |                            |                                          |                                 |                                     |                                                                                 |
| 129 (1 RCT)                                                                              | not serious         | not serious          | not serious         | not serious        | none                    | ⊕⊕⊕⊕<br>HIGH                         | 66                         | 63                                       | -                               | -                                   | MD <b>0.97 lower</b><br>(1.74 lower to 0.2 lower)<br><br><b>Favors tramadol</b> |



## Tramadol 100mg - 400mg daily compared to Placebo for patients with knee or hip OA

| Certainty assessment                                                                     |             |             |             |             |      | Summary of findings |     |     |   |   |                                                                                      |
|------------------------------------------------------------------------------------------|-------------|-------------|-------------|-------------|------|---------------------|-----|-----|---|---|--------------------------------------------------------------------------------------|
| <b>WOMAC Pain (change from baseline) (0-500, lower scores indicate improvement)</b>      |             |             |             |             |      |                     |     |     |   |   |                                                                                      |
| 406<br>(1 RCT)                                                                           | not serious | not serious | not serious | not serious | none | ⊕⊕⊕⊕<br>HIGH        | 205 | 201 | - | - | <b>MD 37.3 lower</b><br>(61.14 lower to 13.46 lower)<br><br><b>Favors tramadol</b>   |
| <b>WOMAC Function (0-20, lower scores indicate improvement)</b>                          |             |             |             |             |      |                     |     |     |   |   |                                                                                      |
| 129<br>(1 RCT)                                                                           | not serious | not serious | not serious | not serious | none | ⊕⊕⊕⊕<br>HIGH        | 66  | 63  | - | - | <b>MD 0.73 lower</b><br>(1.48 lower to 0.02 higher)                                  |
| <b>WOMAC Function (change from baseline) (0-1500, lower scores indicate improvement)</b> |             |             |             |             |      |                     |     |     |   |   |                                                                                      |
| 406<br>(1 RCT)                                                                           | not serious | not serious | not serious | not serious | none | ⊕⊕⊕⊕<br>HIGH        | 205 | 201 | - | - | <b>MD 115.9 lower</b><br>(195.04 lower to 36.76 lower)<br><br><b>Favors tramadol</b> |
| <b>Pain Intensity - NRS (absolute improvement) (lower scores indicate improvement)</b>   |             |             |             |             |      |                     |     |     |   |   |                                                                                      |

| Tramadol 100mg - 400mg daily compared to Placebo for patients with knee or hip OA |             |             |             |                      |      |                  |                     |                   |                                  |              |                                                                                     |
|-----------------------------------------------------------------------------------|-------------|-------------|-------------|----------------------|------|------------------|---------------------|-------------------|----------------------------------|--------------|-------------------------------------------------------------------------------------|
| Certainty assessment                                                              |             |             |             |                      |      |                  | Summary of findings |                   |                                  |              |                                                                                     |
| 589<br>(1 RCT)                                                                    | not serious | not serious | not serious | not serious          | none | ⊕⊕⊕⊕<br>HIGH     | 196                 | 393               | -                                | -            | <b>MD 0.74 higher</b><br>(0.39 higher to 1.09 higher)<br><br><b>Favors tramadol</b> |
| <b>SAE</b>                                                                        |             |             |             |                      |      |                  |                     |                   |                                  |              |                                                                                     |
| 1785<br>(3 RCTs)                                                                  | not serious | not serious | not serious | serious <sup>a</sup> | none | ⊕⊕⊕○<br>MODERATE | 5/485<br>(1.0%)     | 26/1300<br>(2.0%) | <b>OR 1.81</b><br>(0.43 to 7.65) | 10 per 1,000 | <b>8 more per 1,000</b><br>(6 fewer to 63 more)                                     |

**CI:** Confidence interval; **MD:** Mean difference; **OR:** Odds ratio

## Explanations

a. Wide CI crosses no effect line

**Table 2. RCT data not suitable for effect size calculation or combining with other data**

| Ref ID, Author, year | Study type       | Duration | Population Description      | Treatment given to relevant population                           | Results                                                                                                                                                                                                                                           |
|----------------------|------------------|----------|-----------------------------|------------------------------------------------------------------|---------------------------------------------------------------------------------------------------------------------------------------------------------------------------------------------------------------------------------------------------|
| 3173, Babul, 2004    | Double blind RCT | 12 weeks | OA knee                     | Tramadol ER 200mg – 400mg daily<br>n=124<br><br>Placebo<br>N=122 | <b>WOMAC pain (LS mean change from baseline)</b><br>Tramadol = -120.1 mm<br>Placebo = -69.0 mm<br>P-value = <0.001<br><br><b>WOMAC function (LS mean change from baseline)</b><br>Tramadol = -407.0 mm<br>Placebo = -208.5 mm<br>P-Value = <0.001 |
| 3286, Malonne,       | Double blind RCT | 2 week   | OA hip or knee<br>Age=45-80 | Tramadol LP 200mg daily<br>n=85                                  | <b>Global Pain Score (VAS) Change</b><br>Tramadol = -2.34 cm                                                                                                                                                                                      |

|                           |                     |          |                               |                                                                                                                                                                                                                                               |                                                                                                                                                                                                                                                                                                                                                                         |
|---------------------------|---------------------|----------|-------------------------------|-----------------------------------------------------------------------------------------------------------------------------------------------------------------------------------------------------------------------------------------------|-------------------------------------------------------------------------------------------------------------------------------------------------------------------------------------------------------------------------------------------------------------------------------------------------------------------------------------------------------------------------|
| 2004                      |                     |          |                               | Placebo<br>N=112                                                                                                                                                                                                                              | Placebo = -1.55 cm<br>P=value = 0.010<br><br><b>SAE</b><br>Tramadol = 0<br>Placebo = 1 (died suddenly unknown cause; 71y/o woman)                                                                                                                                                                                                                                       |
| 3131,<br>Fishman,<br>2007 | Double<br>blind RCT | 12 weeks | OA knee<br>Age=40-75          | Tramadol 100mg daily<br>n=99<br><br>Tramadol 200mg daily<br>n=107<br><br>Tramadol 300mg daily<br>n=104<br><br>Placebo<br>N=223                                                                                                                | <b>WOMAC Pain improvement from baseline (%)</b><br>Tramadol 100mg daily<br>Mean $\pm$ SD = 41.6 $\pm$ 50.2<br><br>Tramadol 200mg daily<br>Mean $\pm$ SD = 42.8 $\pm$ 46.4<br><br>Tramadol 300mg daily<br>Mean $\pm$ SD = 46.0 $\pm$ 39.9<br><br>Placebo<br>Mean $\pm$ SD = 32.3 $\pm$ 48.2<br><br><b>SAE</b><br>Tramadol 100mg = 1<br>Tramadol 300mg = 1<br>Placebo = 2 |
| 8258,<br>Kean,<br>2009    | Double<br>blind RCT | 12 weeks | OA knee<br>Women<br>Age=40-75 | Tramadol 100mg daily<br>WOMAC Pain n=69<br>WOMAC Function n=68<br><br>Tramadol 200mg daily<br>WOMAC Pain n=70<br>WOMAC Function n=68<br><br>Tramadol 300mg daily<br>WOMAC Pain n=63<br>WOMAC Function n=61<br><br>Placebo<br>WOMAC Pain n=176 | <b>WOMAC Pain improvement from baseline (%)</b><br>Tramadol 100mg daily<br>Mean $\pm$ SD = 58.8 $\pm$ 37.1<br><br>Tramadol 200mg daily<br>Mean $\pm$ SD = 53.0 $\pm$ 38.5<br><br>Tramadol 300mg daily<br>Mean $\pm$ SD = 58.9 $\pm$ 38.8<br><br>Placebo<br>Mean $\pm$ SD = 45.2 $\pm$ 43.8<br><br><b>WOMAC Function improvement from baseline (%)</b>                   |

|  |  |  |  |                      |                                                                                                                                                                                                                                         |
|--|--|--|--|----------------------|-----------------------------------------------------------------------------------------------------------------------------------------------------------------------------------------------------------------------------------------|
|  |  |  |  | WOMAC Function n=168 | Tramadol 100mg daily<br>Mean $\pm$ SD = 56.9 $\pm$ 36.4<br><br>Tramadol 200mg daily<br>Mean $\pm$ SD = 54.0 $\pm$ 33.8<br><br>Tramadol 300mg daily<br>Mean $\pm$ SD = 53.4 $\pm$ 41.4<br><br>Placebo<br>Mean $\pm$ SD = 41.9 $\pm$ 40.8 |
|--|--|--|--|----------------------|-----------------------------------------------------------------------------------------------------------------------------------------------------------------------------------------------------------------------------------------|

## References

1. Malonne H, Coffiner M, Sonet B, Sereno A, Vanderbist F. Efficacy and tolerability of sustained-release tramadol in the treatment of symptomatic osteoarthritis of the hip or knee: a multicenter, randomized, double-blind, placebo-controlled study. *Clin Ther.* 2004;26(11):1774-1782.
2. Gana TJ, Pascual ML, Fleming RR, Schein JR, Janagap CC, Xiang J, et al. Extended-release tramadol in the treatment of osteoarthritis: a multicenter, randomized, double-blind, placebo-controlled clinical trial. *Curr Med Res Opin.* 2006;22(7):1391-1401.
3. Schein JR, Kosinski MR, Janagap-Benson C, Gajria K, Lin P, Freedman JD. Functionality and health-status benefits associated with reduction of osteoarthritis pain. *Curr Med Res Opin.* 2008;24(5):1255-1265.
4. Burch F, Fishman R, Messina N, Corser B, Radulescu F, Sarbu A, et al. A comparison of the analgesic efficacy of Tramadol Contramid OAD versus placebo in patients with pain due to osteoarthritis. *J Pain Symptom Manage.* 2007;34(3):328-338.
5. Fishman RL, Kistler CJ, Ellerbusch MT, Aparicio RT, Swami SS, Shirley ME, et al. Efficacy and safety of 12 weeks of osteoarthritic pain therapy with once-daily tramadol (Tramadol Contramid OAD). *J Opioid Manag.* 2007;3(5):273-280.
6. Babul N, Noveck R, Chipman H, Roth SH, Gana T, Albert K. Efficacy and safety of extended-release, once-daily tramadol in chronic pain: a randomized 12-week clinical trial in osteoarthritis of the knee. *J Pain Symptom Manage.* 2004;28(1):59-71.
7. Kean WF, Bouchard S, Roderich Gossen E. Women with pain due to osteoarthritis: the efficacy and safety of a once-daily formulation of tramadol. *Pain Med.* 2009;10(6):1001-1011.
8. Fleischmann R, Caldwell J, Roth S, Tesser J, Olson W, Kamin M. Tramadol for the treatment of joint pain associated with osteoarthritis: a randomized, double-blind, placebo-controlled trial. *Current Therapeutic Research.* 2001;62(2):113-128.

**PICO 63: Non-tramadol opioids vs. no treatment in OA hip/knee**

Summary. This PICO was addressed by 15 placebo-controlled RCTs [1-15]. Meta-analysis of 12 RCTs found a small but statistically significant difference in WOMAC pain and function favoring non-tramadol opioids, but the difference was not clinically significant. There was a significant increase in serious adverse events in patients receiving non-tramadol opioids. A systematic review that included unpublished trials and trials published only as abstracts showed similar findings.<sup>[16]</sup>

Quality of evidence across all critical outcomes: Low

| <b>Non-tramadol Opioids compared to Placebo for Knee or Hip OA</b>               |                      |                      |                     |                    |                         |                                      |                            |                                 |                                 |                                     |                                                                                  |
|----------------------------------------------------------------------------------|----------------------|----------------------|---------------------|--------------------|-------------------------|--------------------------------------|----------------------------|---------------------------------|---------------------------------|-------------------------------------|----------------------------------------------------------------------------------|
| <b>Certainty assessment</b>                                                      |                      |                      |                     |                    |                         |                                      | <b>Summary of findings</b> |                                 |                                 |                                     |                                                                                  |
| <b>No of participants (studies) Follow-up</b>                                    | <b>Risk of bias</b>  | <b>Inconsistency</b> | <b>Indirectness</b> | <b>Imprecision</b> | <b>Publication bias</b> | <b>Overall certainty of evidence</b> | <b>Number of Patients</b>  |                                 | <b>Relative effect (95% CI)</b> | <b>Anticipated absolute effects</b> |                                                                                  |
|                                                                                  |                      |                      |                     |                    |                         |                                      | <b>With Placebo</b>        | <b>With Nontramadol opioids</b> |                                 | <b>Risk with Placebo</b>            | <b>Risk difference with Nontramadol opioids</b>                                  |
| <b>WOMAC Pain (change from baseline) (lower scores indicate improvement)</b>     |                      |                      |                     |                    |                         |                                      |                            |                                 |                                 |                                     |                                                                                  |
| 2522 (12 RCTs)                                                                   | serious <sup>a</sup> | serious <sup>b</sup> | not serious         | not serious        | none                    | ⊕⊕○○<br>LOW                          | 1326                       | 1196                            | -                               | -                                   | SMD <b>0.17 lower</b><br>(0.31 lower to 0.03 lower)<br><br><b>Favors opioids</b> |
| <b>WOMAC Function (change from baseline) (lower scores indicate improvement)</b> |                      |                      |                     |                    |                         |                                      |                            |                                 |                                 |                                     |                                                                                  |
| 2054 (10 RCTs)                                                                   | serious <sup>a</sup> | serious <sup>b</sup> | not serious         | not serious        | none                    | ⊕⊕○○<br>LOW                          | 1110                       | 944                             | -                               | -                                   | SMD <b>0.17 lower</b><br>(0.33 lower to 0.01 lower)<br><br><b>Favors opioids</b> |
| <b>SAE</b>                                                                       |                      |                      |                     |                    |                         |                                      |                            |                                 |                                 |                                     |                                                                                  |

| Non-tramadol Opioids compared to Placebo for Knee or Hip OA |                      |             |             |             |      |                     |                   |                   |                                  |              |                                                                          |
|-------------------------------------------------------------|----------------------|-------------|-------------|-------------|------|---------------------|-------------------|-------------------|----------------------------------|--------------|--------------------------------------------------------------------------|
| Certainty assessment                                        |                      |             |             |             |      | Summary of findings |                   |                   |                                  |              |                                                                          |
| 3292<br>(9 RCTs)                                            | serious <sup>a</sup> | not serious | not serious | not serious | none | ⊕⊕⊕○<br>MODERATE    | 30/1649<br>(1.8%) | 49/1643<br>(3.0%) | <b>OR 1.66</b><br>(1.04 to 2.66) | 18 per 1,000 | <b>12 more per 1,000</b><br>(1 more to 29 more)<br><b>Favors placebo</b> |

CI: Confidence interval; SMD: Standardised mean difference; OR: Odds ratio

## Explanations

- a. Some studies did not report randomization method or allocation concealment, several studies had high attrition
- b. High I<sup>2</sup> due to study effect size variation

**Table 2. Systematic review or RCT data not suitable for effect size calculation or combining with other data**

| Ref ID, Author, year      | Study type        | Duration                                           | Population Description | Treatment given to relevant population            | Results                                                                                                                                                                    |
|---------------------------|-------------------|----------------------------------------------------|------------------------|---------------------------------------------------|----------------------------------------------------------------------------------------------------------------------------------------------------------------------------|
| Da Costa 2014             | Systematic review | Median duration 1 month (range 3 days to 6 months) | OA knee or hip         | Non-tramadol opioids vs. placebo                  | <b>Pain (SMD)(22 RCTs)</b><br>SMD -0.28 (95% CI -0.35 to -0.20), favors opioids<br><br><b>Function (SMD)(12 RCTs)</b><br>SMD -0.26 (95% CI -0.35 to -0.17), favors opioids |
| Zutra and Smith 2005      | Double blind RCT  | 2 weeks                                            | OA                     | Oxycodone (controlled release) vs placebo         | <b>Pain (0-10)</b><br>P<0.0002 significant pain reduction favoring opioids                                                                                                 |
| Kjaersgaard-Andersen 1990 | Double blind RCT  | 1 month                                            | OA hip                 | Codeine plus acetaminophen vs acetaminophen alone | <b>Percent patients with less pain at 4 weeks compared to baseline</b><br>Codeine/acetaminophen 45% vs acetaminophen 40%, p = not significant.                             |

## References

1. Peloso PM, Bellamy N, Bensen W, Thomson GT, Harsanyi Z, Babul N, et al. Double blind randomized placebo control trial of controlled release codeine in the treatment of osteoarthritis of the hip or knee. *J Rheumatol*. 2000;27(3):764-771.
2. Vojtassak J, Vojtassak J, Jacobs A, Rynn L, Waechter S, Richarz U. A Phase IIIb, Multicentre, Randomised, Parallel-Group, Placebo-Controlled, Double-Blind Study to Investigate the Efficacy and Safety of OROS Hydromorphone in Subjects with Moderate-to-Severe Chronic Pain Induced by Osteoarthritis of the Hip or the Knee. *Pain Res Treat*. 2011;2011:239501.
3. Friedmann N, Klutzaritz V, Webster L. Efficacy and safety of an extended-release oxycodone (Remoxy) formulation in patients with moderate to severe osteoarthritic pain. *J Opioid Manag*. 2011;7(3):193-202.
4. Hartrick C, Van Hove I, Stegmann JU, Oh C, Upmalis D. Efficacy and tolerability of tapentadol immediate release and oxycodone HCl immediate release in patients awaiting primary joint replacement surgery for end-stage joint disease: a 10-day, phase III, randomized, double-blind, active- and placebo-controlled study. *Clin Ther*. 2009;31(2):260-271.
5. Afilalo M, Etropolski MS, Kuperwasser B, Kelly K, Okamoto A, Van Hove I, et al. Efficacy and safety of Tapentadol extended release compared with oxycodone controlled release for the management of moderate to severe chronic pain related to osteoarthritis of the knee: a randomized, double-blind, placebo- and active-controlled phase III study. *Clin Drug Investig*. 2010;30(8):489-505.
6. Serrie A, Lange B, Steup A. Tapentadol prolonged-release for moderate-to-severe chronic osteoarthritis knee pain: a double-blind, randomized, placebo- and oxycodone controlled release-controlled study. *Curr Med Res Opin*. 2017;33(8):1423-1432.
7. Spierings EL, Fidelholtz J, Wolfram G, Smith MD, Brown MT, West CR. A phase III placebo- and oxycodone-controlled study of tanezumab in adults with osteoarthritis pain of the hip or knee. *Pain*. 2013;154(9):1603-1612.
8. Mayorga AJ, Wang S, Kelly KM, Thiphawong J. Efficacy and safety of fulranumab as monotherapy in patients with moderate to severe, chronic knee pain of primary osteoarthritis: a randomised, placebo- and active-controlled trial. *Int J Clin Pract*. 2016;70(6):493-505.
9. Caldwell JR, Rapoport RJ, Davis JC, Offenbergl HL, Marker HW, Roth SH, et al. Efficacy and safety of a once daily morphine formulation in chronic, moderate-to-severe osteoarthritis pain: results from a randomized, placebo-controlled, double-blind trial and an open-label extension trial. *J Pain Symptom Manag* 2002;23(4):278-91.
10. Chindalore VL, Craven RA, Yu KP, Butera PG, Burns LH, Friedmann N. Adding ultra low-dose naltrexone to oxycodone enhances and prolongs analgesia: a randomized, controlled trial of oxytrex. *J Pain* 2005;6(6):392-9.
11. Kivitz A, Ma C, Ahdieh H, Galer BS. A 2-week, multicenter, randomized, double-blind, placebo-controlled, dose-ranging, phase III trial comparing the efficacy of oxymorphone extended release and placebo in adults with pain associated with osteoarthritis of the hip or knee. *Clin Ther* 2006;28(3):352-64.
12. Kjaersgaard-Andersen P, Nafei A, Skov O, Madsen F, Andersen HM, Kroner K, et al. Codeine plus paracetamol versus paracetamol in longer-term treatment of chronic pain due to osteoarthritis of the hip. A randomised, doubleblind, multi-centre study. *Pain* 1990;43(3):309-18.
13. Matsumoto AK, Babul N, Ahdieh H. Oxymorphone extended-release tablets relieve moderate to severe pain and improve physical function in osteoarthritis: results of a randomized, double-blind, placebo- and active-controlled phase III trial. *Pain Med* 2005;6(5):357-66.

14. Munera C, Drehobl M, Sessler NE, Landau C. A randomized, placebo-controlled, double-blinded, parallelgroup, 5-week study of buprenorphine transdermal system in adults with osteoarthritis. *J Opioid Manag* 2010;6(3):193–202.
15. Zautra AJ, Smith BW. Impact of controlled-release oxycodone on efficacy beliefs and coping efforts among osteoarthritis patients with moderate to severe pain. *Clin J Pain* 2005;21(6):471–7.
16. da Costa BR1, Nüesch E, Kasteler R, Husni E, Welch V, Rutjes AW, Jüni P. Oral or transdermal opioids for osteoarthritis of the knee or hip. *Cochrane Database Syst Rev*. 2014 Sep 17;(9): 1-97.

**PICO 64. Gabapentin compared to no treatment in patients with knee or hip OA**

Summary. The literature searches did not identify any studies that addressed this question.

Quality of evidence across all critical outcomes: Very low

**PICO 65. Pregabalin compared to no treatment in patients with knee or hip OA**

Summary. The literature searches did not identify any studies that addressed this question.

Quality of evidence across all critical outcomes: Very low

**PICO 66. Methotrexate compared to no treatment in patients with knee or hip OA**

Summary. The literature searches did not identify any studies that addressed this question.

Quality of evidence across all critical outcomes: Very low

**PICO 67: Colchicine vs. no treatment in patients with knee OA**

This PICO was addressed by 3 double-blind RCTs <sup>[1-3]</sup>. They were small studies that showed conflicting findings regarding the impact of colchicine on improvement in pain; when combined in a meta-analysis, there was serious inconsistency and very serious imprecision in the effect estimate. One study reported no significant between-group difference in WOMAC function.



Quality of evidence across all critical outcomes: Very low

| <b>Colchicine 0.5mg BID compared to Placebo for OA of the knee</b> |                     |                      |                     |                           |                         |                                      |                            |                                  |                                 |                                     |                                                       |
|--------------------------------------------------------------------|---------------------|----------------------|---------------------|---------------------------|-------------------------|--------------------------------------|----------------------------|----------------------------------|---------------------------------|-------------------------------------|-------------------------------------------------------|
| <b>Certainty assessment</b>                                        |                     |                      |                     |                           |                         |                                      | <b>Summary of findings</b> |                                  |                                 |                                     |                                                       |
| <b>Nº of participants (studies) Follow-up</b>                      | <b>Risk of bias</b> | <b>Inconsistency</b> | <b>Indirectness</b> | <b>Imprecision</b>        | <b>Publication bias</b> | <b>Overall certainty of evidence</b> | <b>Number of patients</b>  |                                  | <b>Relative effect (95% CI)</b> | <b>Anticipated absolute effects</b> |                                                       |
|                                                                    |                     |                      |                     |                           |                         |                                      | <b>With Placebo</b>        | <b>With Colchicine 0.5mg BID</b> |                                 | <b>Risk with Placebo</b>            | <b>Risk difference with Colchicine 0.5mg BID</b>      |
| <b>Pain (combines different pain measures) – 16 -20 weeks</b>      |                     |                      |                     |                           |                         |                                      |                            |                                  |                                 |                                     |                                                       |
| 203 (3 RCTs)                                                       | not serious         | serious <sup>a</sup> | not serious         | very serious <sup>b</sup> | none                    | ⊕○○○<br>VERY LOW                     | 101                        | 102                              | -                               | -                                   | <b>SMD 0.24 higher</b><br>(1.12 lower to 1.61 higher) |
| <b>WOMAC Pain (0-100) – change from baseline to 16 weeks</b>       |                     |                      |                     |                           |                         |                                      |                            |                                  |                                 |                                     |                                                       |
| 109 (1 RCT)                                                        | not serious         | not serious          | not serious         | serious <sup>c</sup>      | none                    | ⊕⊕⊕○<br>MODERATE                     | 55                         | 54                               | -                               | -                                   | <b>MD 3.10 higher</b><br>(4.11 lower to 10.31 higher) |
| <b>WOMAC Function (0-100) – change from baseline to 16 weeks</b>   |                     |                      |                     |                           |                         |                                      |                            |                                  |                                 |                                     |                                                       |
| 109 (1 RCT)                                                        | not serious         | not serious          | not serious         | serious <sup>c</sup>      | none                    | ⊕⊕⊕○<br>MODERATE                     | 55                         | 54                               | -                               | -                                   | <b>MD 1.10 lower</b><br>(8.03 lower to 5.83 higher)   |
| <b>VAS Pain (0-15, lower scores indicate improvement)</b>          |                     |                      |                     |                           |                         |                                      |                            |                                  |                                 |                                     |                                                       |

| Colchicine 0.5mg BID compared to Placebo for OA of the knee                 |             |             |             |                      |      |                     |    |    |   |   |                                                                                       |
|-----------------------------------------------------------------------------|-------------|-------------|-------------|----------------------|------|---------------------|----|----|---|---|---------------------------------------------------------------------------------------|
| Certainty assessment                                                        |             |             |             |                      |      | Summary of findings |    |    |   |   |                                                                                       |
| 36<br>(1 RCT)                                                               | not serious | not serious | not serious | serious <sup>d</sup> | none | ⊕⊕⊕○<br>MODERATE    | 17 | 19 | - | - | MD <b>3.4 lower</b><br>(5.3 lower to 1.5 lower)<br><br><b>Favors colchicine</b>       |
| Physician global assessment (VAS)(0-15, higher scores indicate improvement) |             |             |             |                      |      |                     |    |    |   |   |                                                                                       |
| 58<br>(1 RCT)                                                               | not serious | not serious | not serious | serious <sup>d</sup> | none | ⊕⊕⊕⊕<br>MODERATE    | 29 | 29 | - | - | MD <b>6.11 higher</b><br>(4.26 higher to 7.96 higher)<br><br><b>Favors colchicine</b> |

CI: Confidence interval; MD: Mean difference

## Explanations

- $I^2 = 95\%$
- Very wide 95% CI includes possibility of a large effect in either direction.
- Wide 95% CI
- Single small study

## References

- Aran S, Malekzadeh S, Seifirad S. A double-blind randomized controlled trial appraising the symptom-modifying effects of colchicine on osteoarthritis of the knee. Clin Exp Rheumatol. 2011;29(3):513-518.
- Das SK, Ramakrishnan S, Mishra K, Srivastava R, Agarwal GG, Singh R, et al. A randomized controlled trial to evaluate the slow-acting symptom-modifying effects of colchicine in osteoarthritis of the knee: a preliminary report. Arthritis Rheum. 2002;47(3):280-284.
- Leung YY, Haaland B, Huebner JL, Wong SBS, Tjai M, Wang C, et al. Colchicine lack of effectiveness in symptom and inflammation modification in knee osteoarthritis (COLKOA): a randomized controlled trial. Osteoarthritis Cartilage. 2018 May;26(5):631-640.

**PICO 68. Glucosamine compared to no treatment for hip or knee OA**

Summary: This PICO question is addressed by 17 direct RCTs.<sup>[1-17]</sup> However, since between-group differences favoring glucosamine only appeared in studies funded by industry, those studies were removed from our analyses based on evidence of industry bias. For the remaining studies,<sup>[1-3,6-8,12-16]</sup> the results for WOMAC pain and function from 3 to 24 months showed no significant between-group differences (Table 1). Serious adverse events did not differ significantly between groups, but the findings were imprecise due to the small number of events.

Quality of Evidence across all critical outcomes: Moderate.

| <b>Table 1. Glucosamine compared to Placebo for Hip or Knee OA</b>   |                     |                      |                     |                    |                         |                                      |                            |                         |                                 |                                     |                                                     |
|----------------------------------------------------------------------|---------------------|----------------------|---------------------|--------------------|-------------------------|--------------------------------------|----------------------------|-------------------------|---------------------------------|-------------------------------------|-----------------------------------------------------|
| <b>Certainty assessment</b>                                          |                     |                      |                     |                    |                         |                                      | <b>Summary of findings</b> |                         |                                 |                                     |                                                     |
| <b>No of participants (studies) Follow-up</b>                        | <b>Risk of bias</b> | <b>Inconsistency</b> | <b>Indirectness</b> | <b>Imprecision</b> | <b>Publication bias</b> | <b>Overall certainty of evidence</b> | <b>Number of patients</b>  |                         | <b>Relative effect (95% CI)</b> | <b>Anticipated absolute effects</b> |                                                     |
|                                                                      |                     |                      |                     |                    |                         |                                      | <b>With Placebo</b>        | <b>With Glucosamine</b> |                                 | <b>Risk with Placebo</b>            | <b>Risk difference with Glucosamine</b>             |
| <b>WOMAC pain overall (0-20, lower scores indicate improvement)</b>  |                     |                      |                     |                    |                         |                                      |                            |                         |                                 |                                     |                                                     |
| 427 (2 RCTs)                                                         | not serious         | not serious          | not serious         | not serious        | none                    | ⊕⊕⊕⊕<br>HIGH                         | 215                        | 212                     | -                               | -                                   | MD <b>0.55 lower</b><br>(1.51 lower to 0.41 higher) |
| <b>WOMAC pain 3 months (0-20, lower scores indicate improvement)</b> |                     |                      |                     |                    |                         |                                      |                            |                         |                                 |                                     |                                                     |
| 541 (3 RCTs)                                                         | not serious         | not serious          | not serious         | not serious        | none                    | ⊕⊕⊕⊕<br>HIGH                         | 274                        | 267                     | -                               | -                                   | MD <b>0.69 higher</b><br>(0.72 lower to 2.1 higher) |

**Table 1. Glucosamine compared to Placebo for Hip or Knee OA**

| Certainty assessment                                                     |                      |                      |             |                      |      | Summary of findings |     |     |   |   |                                                     |
|--------------------------------------------------------------------------|----------------------|----------------------|-------------|----------------------|------|---------------------|-----|-----|---|---|-----------------------------------------------------|
| <b>WOMAC pain 6 months (0-20, lower scores indicate improvement)</b>     |                      |                      |             |                      |      |                     |     |     |   |   |                                                     |
| 1178<br>(4 RCTs)                                                         | not serious          | not serious          | not serious | not serious          | none | ⊕⊕⊕⊕<br>HIGH        | 586 | 592 | - | - | MD <b>0.76 lower</b><br>(1.74 lower to 0.21 higher) |
| <b>WOMAC pain 12 months (0-20, lower scores indicate improvement)</b>    |                      |                      |             |                      |      |                     |     |     |   |   |                                                     |
| 525<br>(2 RCTs)                                                          | not serious          | not serious          | not serious | not serious          | none | ⊕⊕⊕⊕<br>HIGH        | 262 | 263 | - | - | MD <b>0.19 lower</b><br>(1.02 lower to 0.65 higher) |
| <b>WOMAC pain 24 months (0-20, lower scores indicate improvement)</b>    |                      |                      |             |                      |      |                     |     |     |   |   |                                                     |
| 790<br>(3 RCTs)                                                          | serious <sup>a</sup> | not serious          | not serious | not serious          | none | ⊕⊕⊕⊕<br>HIGH        | 393 | 397 | - | - | MD <b>0.16 lower</b><br>(0.95 lower to 0.63 higher) |
| <b>WOMAC function overall (0-68, lower scores indicate improvement)</b>  |                      |                      |             |                      |      |                     |     |     |   |   |                                                     |
| 427<br>(2 RCTs)                                                          | not serious          | serious <sup>c</sup> | not serious | serious <sup>d</sup> | none | ⊕⊕○○<br>LOW         | 215 | 212 | - | - | MD <b>1.06 lower</b><br>(3.6 lower to 1.47 higher)  |
| <b>WOMAC Function 3 months (0-68, lower scores indicate improvement)</b> |                      |                      |             |                      |      |                     |     |     |   |   |                                                     |

**Table 1. Glucosamine compared to Placebo for Hip or Knee OA**

| Certainty assessment                                                      |             |             |             |                      |      |                  | Summary of findings |     |   |   |                                                      |
|---------------------------------------------------------------------------|-------------|-------------|-------------|----------------------|------|------------------|---------------------|-----|---|---|------------------------------------------------------|
| 541<br>(3 RCTs)                                                           | not serious | not serious | not serious | serious <sup>d</sup> | none | ⊕⊕⊕○<br>MODERATE | 274                 | 267 | - | - | MD <b>0.69 higher</b><br>(3.38 lower to 4.76 higher) |
| <b>WOMAC function 6 months (0-68, lower scores indicate improvement)</b>  |             |             |             |                      |      |                  |                     |     |   |   |                                                      |
| 1178<br>(4 RCTs)                                                          | not serious | not serious | not serious | serious <sup>d</sup> | none | ⊕⊕⊕○<br>MODERATE | 586                 | 592 | - | - | MD <b>0.47 lower</b><br>(6.31 lower to 5.36 higher)  |
| <b>WOMAC Function 12 months (0-68, lower scores indicate improvement)</b> |             |             |             |                      |      |                  |                     |     |   |   |                                                      |
| 222<br>(1 RCT)                                                            | not serious | not serious | not serious | serious <sup>d</sup> | none | ⊕⊕⊕○<br>MODERATE | 111                 | 111 | - | - | MD <b>0.1 higher</b><br>(4.19 lower to 4.39 higher)  |
| <b>WOMAC Function 24 months (0-68, lower scores indicate improvement)</b> |             |             |             |                      |      |                  |                     |     |   |   |                                                      |
| 487<br>(2 RCTs)                                                           | not serious | not serious | not serious | serious <sup>d</sup> | none | ⊕⊕⊕○<br>MODERATE | 242                 | 245 | - | - | MD <b>1.15 lower</b><br>(4.81 lower to 2.51 higher)  |

**Table 1. Glucosamine compared to Placebo for Hip or Knee OA**

| Certainty assessment |             |             |             |                      |      | Summary of findings |                 |                 |                                   |              |                                                    |
|----------------------|-------------|-------------|-------------|----------------------|------|---------------------|-----------------|-----------------|-----------------------------------|--------------|----------------------------------------------------|
| SAE                  |             |             |             |                      |      |                     |                 |                 |                                   |              |                                                    |
| 222<br>(1 RCT)       | not serious | not serious | not serious | serious <sup>d</sup> | none | ⊕⊕⊕○<br>MODERATE    | 2/111<br>(1.8%) | 4/111<br>(3.6%) | <b>OR 2.04</b><br>(0.37 to 11.36) | 18 per 1,000 | <b>18 more per 1,000</b><br>(11 fewer to 154 more) |

**CI:** Confidence interval; **MD:** Mean difference; **OR:** Odds ratio; **SMD:** Standardized mean difference

### Explanations

- a. One study had selective outcome reporting
- b. One or more studies had selective outcome reporting or inadequate allocation concealment
- c. I-squared is 75%, mean values of both studies on the opposite sides of a no-effect line
- d. Wide 95% CI crossing line of no effect

**Table 2. RCT data not suitable for effect size calculation or combining with other data**

| Author, year    | Study type       | Duration | Population Description | Treatment given to relevant population                  | Results                                                                                                                                                    |
|-----------------|------------------|----------|------------------------|---------------------------------------------------------|------------------------------------------------------------------------------------------------------------------------------------------------------------|
| 993 Rovati 1992 | Double-blind RCT | 6 weeks  | OA knee patients       | Group A: Glucosamine 1500 mg/day or<br>Group B: placebo | Lequesne's index response rate (ITT analysis):<br>4 weeks: Group A 66/126 (52%); Group B 46/126 (37%)<br>6 weeks: Group A 40/79 (51%); Group B 23/76 (32%) |

### References:

1. Cibere, J., Kopec, J. A., Thorne, A., Singer, J., Canvin, J., Robinson, D. B., . . . Esdaile, J. M. (2004). Randomized, double-blind, placebo-controlled glucosamine discontinuation trial in knee osteoarthritis. *Arthritis Rheum*, 51(5), 738-745. doi:10.1002/art.20697

2. Fransen, M., Agaliotis, M., Nairn, L., Votrubec, M., Bridgett, L., Su, S., . . . group, L. s. c. (2015). Glucosamine and chondroitin for knee osteoarthritis: a double-blind randomised placebo-controlled clinical trial evaluating single and combination regimens. *Ann Rheum Dis*, 74(5), 851-858. doi:10.1136/annrheumdis-2013-203954
3. Giordano, N., Fioravanti, A., Papakostas, P., Montella, A., Giorgi, G., & Nuti, R. (2009). The efficacy and tolerability of glucosamine sulfate in the treatment of knee osteoarthritis: A randomized, double-blind, placebo-controlled trial. *Curr Ther Res Clin Exp*, 70(3), 185-196. doi:10.1016/j.curtheres.2009.05.004
4. Herrero-Beaumont, G., Ivorra, J. A., Del Carmen Trabado, M., Blanco, F. J., Benito, P., Martin-Mola, E., . . . Branco, J. (2007). Glucosamine sulfate in the treatment of knee osteoarthritis symptoms: a randomized, double-blind, placebo-controlled study using acetaminophen as a side comparator. *Arthritis Rheum*, 56(2), 555-567. doi:10.1002/art.22371
5. Houpt, J. B., McMillan, R., Wein, C., & Paget-Dellio, S. D. (1999). Effect of glucosamine hydrochloride in the treatment of pain of osteoarthritis of the knee. *J Rheumatol*, 26(11), 2423-2430.
6. Hughes, R., & Carr, A. (2002). A randomized, double-blind, placebo-controlled trial of glucosamine sulphate as an analgesic in osteoarthritis of the knee. *Rheumatology (Oxford)*, 41(3), 279-284.
7. Kwoh, C. K., Roemer, F. W., Hannon, M. J., Moore, C. E., Jakicic, J. M., Guermazi, A., . . . Boudreau, R. (2014). Effect of oral glucosamine on joint structure in individuals with chronic knee pain: a randomized, placebo-controlled clinical trial. *Arthritis Rheumatol*, 66(4), 930-939. doi:10.1002/art.38314
8. McAlindon, T., Formica, M., LaValley, M., Lehmer, M., & Kabbara, K. (2004). Effectiveness of glucosamine for symptoms of knee osteoarthritis: results from an internet-based randomized double-blind controlled trial. *Am J Med*, 117(9), 643-649. doi:10.1016/j.amjmed.2004.06.023
9. Noack, W., Fischer, M., Forster, K. K., Rovati, L. C., & Setnikar, I. (1994). Glucosamine sulfate in osteoarthritis of the knee. *Osteoarthritis Cartilage*, 2(1), 51-59.
10. Pavelka, K., Gatterova, J., Olejarova, M., Machacek, S., Giacobelli, G., & Rovati, L. C. (2002). Glucosamine sulfate use and delay of progression of knee osteoarthritis: a 3-year, randomized, placebo-controlled, double-blind study. *Arch Intern Med*, 162(18), 2113-2123.
11. Reginster, J. Y., Deroisy, R., Rovati, L. C., Lee, R. L., Lejeune, E., Bruyere, O., . . . Gossett, C. (2001). Long-term effects of glucosamine sulphate on osteoarthritis progression: a randomised, placebo-controlled clinical trial. *Lancet*, 357(9252), 251-256. doi:10.1016/S0140-6736(00)03610-2
12. Rindone, J. P., Hiller, D., Collacott, E., Nordhaugen, N., & Arriola, G. (2000). Randomized, controlled trial of glucosamine for treating osteoarthritis of the knee. *West J Med*, 172(2), 91-94.
13. Rovati, L. C. (1992). Clinical research in osteoarthritis: design and results of short-term and long-term trials with disease-modifying drugs. *Int J Tissue React*, 14(5), 243-251.

14. Rozendaal, R. M., Koes, B. W., van Osch, G. J., Uitterlinden, E. J., Garling, E. H., Willemsen, S. P., . . . Bierma-Zeinstra, S. M. (2008). Effect of glucosamine sulfate on hip osteoarthritis: a randomized trial. *Ann Intern Med*, 148(4), 268-277.
15. Usha, P. R., & Naidu, M. U. (2004). Randomised, Double-Blind, Parallel, Placebo-Controlled Study of Oral Glucosamine, Methylsulfonylmethane and their Combination in Osteoarthritis. *Clin Drug Investig*, 24(6), 353-363.
16. Sawitzke, A. et al. (2010). Clinical efficacy and safety of glucosamine, chondroitin sulphate, their combination, celecoxib or placebo taken to treat osteoarthritis of the knee: 2-year results from GAIT. *Ann Rheum Dis* 2010;69:1459–1464. doi:10.1136/ard.2009.120469
17. Clegg D., (2006). Glucosamine, Chondroitin Sulfate, and the Two in Combination for Painful Knee Osteoarthritis. *N Engl J Med* 2006;354:795-808

**PICO 69: Chondroitin versus no treatment for hip or knee OA**

Summary: This PICO question is addressed by 18 direct RCTs<sup>[1-18]</sup>. However, as with glucosamine there was clear evidence of industry bias; only industry-funded trials found positive results for pain and function favoring chondroitin over placebo. Therefore, these studies were removed from our analyses. For the remaining 4 RCTs,<sup>[3,9,17,18]</sup> WOMAC pain and function subscales found no significant between-group difference at any time point from 6 to 24 months. Serious adverse events did not differ significantly between groups, but the findings are imprecise.

Quality of Evidence across all critical outcomes: Moderate.

| <b>Table 1. Chondroitin compared to placebo for OA of the knee or hip</b> |                     |                      |                     |                    |                         |                                      |                            |                         |                                 |                                     |                                         |
|---------------------------------------------------------------------------|---------------------|----------------------|---------------------|--------------------|-------------------------|--------------------------------------|----------------------------|-------------------------|---------------------------------|-------------------------------------|-----------------------------------------|
| <b>Certainty assessment</b>                                               |                     |                      |                     |                    |                         |                                      | <b>Summary of findings</b> |                         |                                 |                                     |                                         |
| <b>Nº of participants (studies) Follow-up</b>                             | <b>Risk of bias</b> | <b>Inconsistency</b> | <b>Indirectness</b> | <b>Imprecision</b> | <b>Publication bias</b> | <b>Overall certainty of evidence</b> | <b>Number of patients</b>  |                         | <b>Relative effect (95% CI)</b> | <b>Anticipated absolute effects</b> |                                         |
|                                                                           |                     |                      |                     |                    |                         |                                      | <b>With placebo</b>        | <b>With Chondroitin</b> |                                 | <b>Risk with placebo</b>            | <b>Risk difference with Chondroitin</b> |
| <b>WOMAC pain, 6 months (0-500, lower scores indicate improvement)</b>    |                     |                      |                     |                    |                         |                                      |                            |                         |                                 |                                     |                                         |



**Table 1. Chondroitin compared to placebo for OA of the knee or hip**

| Certainty assessment                                                        |             |             |             |                      |      |                  | Summary of findings |     |   |   |                                                       |
|-----------------------------------------------------------------------------|-------------|-------------|-------------|----------------------|------|------------------|---------------------|-----|---|---|-------------------------------------------------------|
| 631<br>(1 RCT)                                                              | not serious | not serious | not serious | serious <sup>a</sup> | none | ⊕⊕⊕○<br>MODERATE | 313                 | 318 | - | - | MD <b>2.2 higher</b><br>(15.02 lower to 19.42 higher) |
| <b>WOMAC pain, 12 months (0-20, lower scores indicate improvement)</b>      |             |             |             |                      |      |                  |                     |     |   |   |                                                       |
| 302<br>(1 RCT)                                                              | not serious | not serious | not serious | not serious          | none | ⊕⊕⊕⊕<br>HIGH     | 151                 | 151 | - | - | MD <b>0.2 higher</b><br>(0.64 lower to 1.04 higher)   |
| <b>WOMAC pain, 2 years (lower scores indicate improvement)</b>              |             |             |             |                      |      |                  |                     |     |   |   |                                                       |
| 859<br>(3 RCTs)                                                             | not serious | not serious | not serious | not serious          | none | ⊕⊕⊕⊕<br>HIGH     | 432                 | 427 | - | - | SMD <b>0.01 lower</b><br>(0.14 lower to 0.12 higher)  |
| <b>WOMAC function, 6 months (0-1500, lower scores indicate improvement)</b> |             |             |             |                      |      |                  |                     |     |   |   |                                                       |
| 631<br>(1 RCT)                                                              | not serious | not serious | not serious | serious <sup>a</sup> | none | ⊕⊕⊕○<br>MODERATE | 313                 | 318 | - | - | MD <b>8.2 lower</b><br>(63.57 lower to 47.17 higher)  |

**Table 1. Chondroitin compared to placebo for OA of the knee or hip**

| Certainty assessment                                                       |             |             |             |                      |      | Summary of findings |                  |                  |                           |              |                                                      |
|----------------------------------------------------------------------------|-------------|-------------|-------------|----------------------|------|---------------------|------------------|------------------|---------------------------|--------------|------------------------------------------------------|
| <b>WOMAC function, 12 months (0-20, lower scores indicate improvement)</b> |             |             |             |                      |      |                     |                  |                  |                           |              |                                                      |
| 302<br>(1 RCT)                                                             | not serious | not serious | not serious | not serious          | none | ⊕⊕⊕⊕<br>HIGH        | 151              | 151              | -                         | -            | MD <b>0.3 lower</b><br>(3.07 lower to 2.47 higher)   |
| <b>WOMAC function, 2 years (lower scores indicate improvement)</b>         |             |             |             |                      |      |                     |                  |                  |                           |              |                                                      |
| 859<br>(3 RCTs)                                                            | not serious | not serious | not serious | not serious          | none | ⊕⊕⊕⊕<br>HIGH        | 432              | 427              | -                         | -            | SMD <b>0.03 lower</b><br>(0.16 lower to 0.11 higher) |
| <b>SAE</b>                                                                 |             |             |             |                      |      |                     |                  |                  |                           |              |                                                      |
| 612<br>(3 RCTs)                                                            | not serious | not serious | not serious | serious <sup>a</sup> | none | ⊕⊕⊕○<br>MODERATE    | 11/306<br>(3.6%) | 13/306<br>(4.2%) | OR 1.19<br>(0.52 to 2.72) | 36 per 1,000 | <b>7 more per 1,000</b><br>(17 fewer to 56 more)     |

CI: Confidence interval; MD: Mean difference; OR: Odds ratio

**Explanations**

a. Wide 95% CI crossing line of no effect

**References:**

1. Bourgeois, P., Chales, G., Dehais, J., Delcambre, B., Kuntz, J. L., & Rozenberg, S. (1998). Efficacy and tolerability of chondroitin sulfate 1200 mg/day vs chondroitin sulfate 3 x 400 mg/day vs placebo. *Osteoarthritis Cartilage*, 6 Suppl A, 25-30.
2. Bucsi, L., & Poor, G. (1998). Efficacy and tolerability of oral chondroitin sulfate as a symptomatic slow-acting drug for osteoarthritis (SYSADOA) in the treatment of knee osteoarthritis. *Osteoarthritis Cartilage*, 6 Suppl A, 31-36.
3. Fransen, M., Agalotis, M., Nairn, L., Votrubec, M., Bridgett, L., Su, S., . . . group, L. s. c. (2015). Glucosamine and chondroitin for knee osteoarthritis: a double-blind randomised placebo-controlled clinical trial evaluating single and combination regimens. *Ann Rheum Dis*, 74(5), 851-858. doi:10.1136/annrheumdis-2013-203954
4. Kahan, A., Uebelhart, D., De Vathaire, F., Delmas, P. D., & Reginster, J. Y. (2009). Long-term effects of chondroitins 4 and 6 sulfate on knee osteoarthritis: the study on osteoarthritis progression prevention, a two-year, randomized, double-blind, placebo-controlled trial. *Arthritis Rheum*, 60(2), 524-533. doi:10.1002/art.24255
5. Lubis, A. M. T., Siagian, C., Wonggokusuma, E., Marsetyo, A. F., & Setyohadi, B. (2017). Comparison of Glucosamine-Chondroitin Sulfate with and without Methylsulfonylmethane in Grade I-II Knee Osteoarthritis: A Double Blind Randomized Controlled Trial. *Acta Med Indones*, 49(2), 105-111.
6. Lugo, J. P., Saiyed, Z. M., & Lane, N. E. (2016). Efficacy and tolerability of an undenatured type II collagen supplement in modulating knee osteoarthritis symptoms: a multicenter randomized, double-blind, placebo-controlled study. *Nutr J*, 15, 14. doi:10.1186/s12937-016-0130-8
7. Mazieres, B., Combe, B., Phan Van, A., Tondut, J., & Grynfeldt, M. (2001). Chondroitin sulfate in osteoarthritis of the knee: a prospective, double blind, placebo controlled multicenter clinical study. *J Rheumatol*, 28(1), 173-181.
8. Mazieres, B., Hucher, M., Zaim, M., & Garnero, P. (2007). Effect of chondroitin sulphate in symptomatic knee osteoarthritis: a multicentre, randomised, double-blind, placebo-controlled study. *Ann Rheum Dis*, 66(5), 639-645. doi:10.1136/ard.2006.059899
9. Michel, B. A., Stucki, G., Frey, D., De Vathaire, F., Vignon, E., Bruehlmann, P., & Uebelhart, D. (2005). Chondroitins 4 and 6 sulfate in osteoarthritis of the knee: a randomized, controlled trial. *Arthritis Rheum*, 52(3), 779-786. doi:10.1002/art.20867
10. Moller, I., Perez, M., Monfort, J., Benito, P., Cuevas, J., Perna, C., . . . Verges, J. (2010). Effectiveness of chondroitin sulphate in patients with concomitant knee osteoarthritis and psoriasis: a randomized, double-blind, placebo-controlled study. *Osteoarthritis Cartilage*, 18 Suppl 1, S32-40. doi:10.1016/j.joca.2010.01.018
11. Roman-Blas, J. A., Castaneda, S., Sanchez-Pernaute, O., Largo, R., Herrero-Beaumont, G., & Group, C. G. C. T. S. (2017). Combined Treatment With Chondroitin Sulfate and Glucosamine Sulfate Shows No Superiority Over Placebo for Reduction of Joint Pain and Functional Impairment in Patients With Knee Osteoarthritis: A Six-Month Multicenter, Randomized, Double-Blind, Placebo-Controlled Clinical Trial. *Arthritis Rheumatol*, 69(1), 77-85. doi:10.1002/art.39819

12. Tsuji, T., Yoon, J., Kitano, N., Okura, T., & Tanaka, K. (2016). Effects of N-acetyl glucosamine and chondroitin sulfate supplementation on knee pain and self-reported knee function in middle-aged and older Japanese adults: a randomized, double-blind, placebo-controlled trial. *Aging Clin Exp Res*, 28(2), 197-205. doi:10.1007/s40520-015-0412-6
13. Uebelhart, D., Malaise, M., Marcolongo, R., de Vathaire, F., Piperno, M., Mailleux, E., . . . Vignon, E. (2004). Intermittent treatment of knee osteoarthritis with oral chondroitin sulfate: a one-year, randomized, double-blind, multicenter study versus placebo. *Osteoarthritis Cartilage*, 12(4), 269-276. doi:10.1016/j.joca.2004.01.004
14. Uebelhart, D., Thonar, E. J., Delmas, P. D., Chantraine, A., & Vignon, E. (1998). Effects of oral chondroitin sulfate on the progression of knee osteoarthritis: a pilot study. *Osteoarthritis Cartilage*, 6 Suppl A, 39-46.
15. Wildi, L. M., Raynauld, J. P., Martel-Pelletier, J., Beaulieu, A., Bessette, L., Morin, F., . . . Pelletier, J. P. (2011). Chondroitin sulphate reduces both cartilage volume loss and bone marrow lesions in knee osteoarthritis patients starting as early as 6 months after initiation of therapy: a randomised, double-blind, placebo-controlled pilot study using MRI. *Ann Rheum Dis*, 70(6), 982-989. doi:10.1136/ard.2010.140848
16. Zegels, B., Crozes, P., Uebelhart, D., Bruyere, O., & Reginster, J. Y. (2013). Equivalence of a single dose (1200 mg) compared to a three-time a day dose (400 mg) of chondroitin 4&6 sulfate in patients with knee osteoarthritis. Results of a randomized double blind placebo controlled study. *Osteoarthritis Cartilage*, 21(1), 22-27. doi:10.1016/j.joca.2012.09.017
17. Sawitzke, A. et al. (2010). Clinical efficacy and safety of glucosamine, chondroitin sulphate, their combination, celecoxib or placebo taken to treat osteoarthritis of the knee: 2-year results from GAIT. *Ann Rheum Dis* 2010;69:1459–1464. doi:10.1136/ard.2009.120469
18. Clegg D., (2006). Glucosamine, Chondroitin Sulfate, and the Two in Combination for Painful Knee Osteoarthritis. *N Engl J Med* 2006;354:795-808

**PICO 70: Glucosamine + chondroitin versus no treatment for hip or knee OA**

Summary: This PICO question is addressed by 10 direct RCTs<sup>[1-10]</sup>. However, as noted for PICO 68 and 69, there was some evidence of industry bias in that the only positive findings for glucosamine plus chondroitin came from industry-funded studies. Therefore, we removed these studies from the analysis. For the remaining studies,<sup>[2,7-10]</sup> the results across all outcomes show no significant difference between glucosamine/chondroitin and placebo in pain, function, or serious adverse events. All findings were inconclusive due to imprecision in effect estimates.

Quality of Evidence across outcomes: Moderate

## Glucosamine plus Chondroitin compared to Placebo for Knee or Hip OA

| Glucosamine plus Chondroitin compared to Placebo for Knee or Hip OA    |              |               |              |                      |                  |                               |                     |                                   |                          |                              |                                                      |
|------------------------------------------------------------------------|--------------|---------------|--------------|----------------------|------------------|-------------------------------|---------------------|-----------------------------------|--------------------------|------------------------------|------------------------------------------------------|
| Certainty assessment                                                   |              |               |              |                      |                  |                               | Summary of findings |                                   |                          |                              |                                                      |
| No of participants (studies)<br>Follow-up                              | Risk of bias | Inconsistency | Indirectness | Imprecision          | Publication bias | Overall certainty of evidence | Number of patients  |                                   | Relative effect (95% CI) | Anticipated absolute effects |                                                      |
|                                                                        |              |               |              |                      |                  |                               | With Placebo        | With Glucosamine plus Chondroitin |                          | Risk with Placebo            | Risk difference with Glucosamine plus Chondroitin    |
| <b>WOMAC pain, 6 months (lower scores indicate improvement)</b>        |              |               |              |                      |                  |                               |                     |                                   |                          |                              |                                                      |
| 630<br>(1 study)                                                       | not serious  | not serious   | not serious  | serious <sup>a</sup> | none             | ⊕⊕⊕○<br>MODERATE              | 313                 | 317                               | -                        | -                            | SMD <b>0.13 lower</b><br>(0.28 lower to 0.03 higher) |
| <b>WOMAC pain 12 months (lower scores indicate improvement)</b>        |              |               |              |                      |                  |                               |                     |                                   |                          |                              |                                                      |
| 303<br>(1 study)                                                       | not serious  | not serious   | not serious  | serious <sup>a</sup> | none             | ⊕⊕⊕○<br>MODERATE              | 151                 | 152                               | -                        | -                            | SMD <b>0.05 lower</b><br>(0.28 lower to 0.17 higher) |
| <b>WOMAC pain 24 months (lower scores indicate improvement)</b>        |              |               |              |                      |                  |                               |                     |                                   |                          |                              |                                                      |
| 563<br>(2 studies)                                                     | not serious  | not serious   | not serious  | serious <sup>a</sup> | none             | ⊕⊕⊕○<br>MODERATE              | 282                 | 281                               | -                        | -                            | SMD <b>0.01 lower</b><br>(0.17 lower to 0.16 higher) |
| <b>WOMAC total score, 6 months (lower scores indicate improvement)</b> |              |               |              |                      |                  |                               |                     |                                   |                          |                              |                                                      |

## Glucosamine plus Chondroitin compared to Placebo for Knee or Hip OA

| Certainty assessment                                                |             |             |             |                      |      |                  | Summary of findings |     |   |   |                                                      |
|---------------------------------------------------------------------|-------------|-------------|-------------|----------------------|------|------------------|---------------------|-----|---|---|------------------------------------------------------|
| 99<br>(1 study)                                                     | not serious | not serious | not serious | serious <sup>a</sup> | none | ⊕⊕⊕○<br>MODERATE | 50                  | 49  | - | - | SMD <b>0.04 lower</b><br>(0.43 lower to 0.36 higher) |
| <b>HAQ pain, 6 months (lower scores indicate improvement)</b>       |             |             |             |                      |      |                  |                     |     |   |   |                                                      |
| 630<br>(1 study)                                                    | not serious | not serious | not serious | serious <sup>a</sup> | none | ⊕⊕⊕○<br>MODERATE | 313                 | 317 | - | - | MD <b>4.2 lower</b><br>(8.64 lower to 0.24 higher)   |
| <b>WOMAC function, 6 months (lower scores indicate improvement)</b> |             |             |             |                      |      |                  |                     |     |   |   |                                                      |
| 630<br>(1 study)                                                    | not serious | not serious | not serious | serious <sup>a</sup> | none | ⊕⊕⊕○<br>MODERATE | 313                 | 317 | - | - | SMD <b>0.14 lower</b><br>(0.29 lower to 0.02 higher) |
| <b>WOMAC function 24 months (lower scores indicate improvement)</b> |             |             |             |                      |      |                  |                     |     |   |   |                                                      |
| 260<br>(1 study)                                                    | not serious | not serious | not serious | serious <sup>a</sup> | none | ⊕⊕⊕○<br>MODERATE | 131                 | 129 | - | - | SMD <b>0.14 higher</b><br>(0.1 lower to 0.39 higher) |
| <b>SAE, 6 months</b>                                                |             |             |             |                      |      |                  |                     |     |   |   |                                                      |

| Glucosamine plus Chondroitin compared to Placebo for Knee or Hip OA |             |             |             |                      |      |                     |                |             |                                  |              |                                                    |
|---------------------------------------------------------------------|-------------|-------------|-------------|----------------------|------|---------------------|----------------|-------------|----------------------------------|--------------|----------------------------------------------------|
| Certainty assessment                                                |             |             |             |                      |      | Summary of findings |                |             |                                  |              |                                                    |
| 158<br>(1 study)                                                    | not serious | not serious | not serious | serious <sup>a</sup> | none | ⊕⊕⊕○<br>MODERATE    | 2/78<br>(2.6%) | 2/80 (2.5%) | <b>OR 0.97</b><br>(0.13 to 7.09) | 26 per 1,000 | <b>1 fewer per 1,000</b><br>(22 fewer to 132 more) |

**CI:** Confidence interval; **SMD:** Standardised mean difference; **OR:** Odds ratio; **MD:** Mean difference

## Explanations

- a. Wide CI crossing significant effect and no-effect lines
- b. I-squared is 99%
- c. I-squared is 90%
- d. Wide CI from small to very significant effect, small sample

## References:

1. Das, A., Jr., & Hammad, T. A. (2000). Efficacy of a combination of FCHG49 glucosamine hydrochloride, TRH122 low molecular weight sodium chondroitin sulfate and manganese ascorbate in the management of knee osteoarthritis. *Osteoarthritis Cartilage*, 8(5), 343-350. doi:10.1053/joca.1999.0308
2. Lubis, A. M. T., Siagian, C., Wunggokusuma, E., Marsetyo, A. F., & Setyohadi, B. (2017). Comparison of Glucosamine-Chondroitin Sulfate with and without Methylsulfonylmethane in Grade I-II Knee Osteoarthritis: A Double Blind Randomized Controlled Trial. *Acta Med Indones*, 49(2), 105-111.
3. Lugo, J. P., Saiyed, Z. M., & Lane, N. E. (2016). Efficacy and tolerability of an undenatured type II collagen supplement in modulating knee osteoarthritis symptoms: a multicenter randomized, double-blind, placebo-controlled study. *Nutr J*, 15, 14. doi:10.1186/s12937-016-0130-8

4. Roman-Blas, J. A., Castaneda, S., Sanchez-Pernaute, O., Largo, R., Herrero-Beaumont, G., & Group, C. G. C. T. S. (2017). Combined Treatment With Chondroitin Sulfate and Glucosamine Sulfate Shows No Superiority Over Placebo for Reduction of Joint Pain and Functional Impairment in Patients With Knee Osteoarthritis: A Six-Month Multicenter, Randomized, Double-Blind, Placebo-Controlled Clinical Trial. *Arthritis Rheumatol*, 69(1), 77-85. doi:10.1002/art.39819
5. Tsuji, T., Yoon, J., Kitano, N., Okura, T., & Tanaka, K. (2016). Effects of N-acetyl glucosamine and chondroitin sulfate supplementation on knee pain and self-reported knee function in middle-aged and older Japanese adults: a randomized, double-blind, placebo-controlled trial. *Aging Clin Exp Res*, 28(2), 197-205. doi:10.1007/s40520-015-0412-6
6. Sadeghi, A., et al. (2014). Low dose glucosamine and chondroitin sulfate use in knee osteoarthritis. *J. Chem. Pharm. Res.*, 2014, 6(4):633-636
7. Sawitzke, A. et al. (2010). Clinical efficacy and safety of glucosamine, chondroitin sulphate, their combination, celecoxib or placebo taken to treat osteoarthritis of the knee: 2-year results from GAIT. *Ann Rheum Dis* 2010;69:1459–1464. doi:10.1136/ard.2009.120469
8. Clegg D., (2006). Glucosamine, Chondroitin Sulfate, and the Two in Combination for Painful Knee Osteoarthritis. *N Engl J Med* 2006;354:795-808
9. Fransen M, et al. (2013). Glucosamine and chondroitin for knee osteoarthritis: a double-blind randomised placebo-controlled clinical trial evaluating single and combination regimens *Ann Rheum Dis* 2015;74:851–858. doi:10.1136/annrheumdis-2013-203954
10. Sawitzke, A. et al. (2010). Clinical efficacy and safety of glucosamine, chondroitin sulphate, their combination, celecoxib or placebo taken to treat osteoarthritis of the knee: 2-year results from GAIT. *Ann Rheum Dis* 2010;69:1459–1464. doi:10.1136/ard.2009.120469

#### **PICO 71: Vitamin D versus no treatment for hip or knee OA**

Summary: This PICO question is addressed by 4 direct RCTs <sup>[1-4]</sup>. The results for WOMAC pain and function subscales at different time points were slightly in favor of vitamin D over placebo, although at most time points the findings were imprecise. Combining data from all studies revealed a small statistically significant difference favoring vitamin D, but the difference may not be clinically significant and the heterogeneity in effect sizes among different studies is high. The results for SAE at 6 months and 3 years had high imprecision due to wide 95% CIs around the effect estimates.

Quality of Evidence across outcomes: Low



## Vitamin D compared to Placebo for Knee or Hip OA

| Certainty assessment                                                   |              |                      |              |                      |                  |                               | Summary of findings |                |                          |                              |                                                                                    |
|------------------------------------------------------------------------|--------------|----------------------|--------------|----------------------|------------------|-------------------------------|---------------------|----------------|--------------------------|------------------------------|------------------------------------------------------------------------------------|
| No of participants (studies)<br>Follow-up                              | Risk of bias | Inconsistency        | Indirectness | Imprecision          | Publication bias | Overall certainty of evidence | Number of patients  |                | Relative effect (95% CI) | Anticipated absolute effects |                                                                                    |
|                                                                        |              |                      |              |                      |                  |                               | With Placebo        | With Vitamin D |                          | Risk with Placebo            | Risk difference with Vitamin D                                                     |
| <b>WOMAC Pain (combined different scales) 6 to 36 months</b>           |              |                      |              |                      |                  |                               |                     |                |                          |                              |                                                                                    |
| 1130 (4 RCTs)                                                          | not serious  | serious <sup>a</sup> | not serious  | serious <sup>b</sup> | none             | ⊕⊕○○<br>LOW                   | 570                 | 560            | -                        | -                            | <b>SMD 0.32 lower</b><br>(0.63 lower to 0.02 lower)<br><br><b>Favors vitamin D</b> |
| <b>WOMAC Pain (combined different scales) 6 to 36 months</b>           |              |                      |              |                      |                  |                               |                     |                |                          |                              |                                                                                    |
| 1130 (4 RCTs)                                                          | not serious  | serious <sup>a</sup> | not serious  | serious <sup>b</sup> | none             | ⊕⊕○○<br>LOW                   | 570                 | 560            | -                        | -                            | <b>SMD 0.34 lower</b><br>(0.61 lower to 0.07 lower)<br><br><b>Favors vitamin D</b> |
| <b>WOMAC pain, 6 months (0-500, lower scores indicate improvement)</b> |              |                      |              |                      |                  |                               |                     |                |                          |                              |                                                                                    |

## Vitamin D compared to Placebo for Knee or Hip OA

| Certainty assessment                                                   |             |             |             |                      |      |                  | Summary of findings |     |   |   |                                                                                   |
|------------------------------------------------------------------------|-------------|-------------|-------------|----------------------|------|------------------|---------------------|-----|---|---|-----------------------------------------------------------------------------------|
| 413<br>(1 RCT)                                                         | not serious | not serious | not serious | serious <sup>c</sup> | none | ⊕⊕⊕○<br>MODERATE | 204                 | 209 | - | - | MD <b>14.8 lower</b><br>(32.38 lower to 2.78 higher)                              |
| <b>WOMAC pain, 12 months (0-20, lower scores indicate improvement)</b> |             |             |             |                      |      |                  |                     |     |   |   |                                                                                   |
| 103<br>(1 RCT)                                                         | not serious | not serious | not serious | serious <sup>d</sup> | none | ⊕⊕⊕○<br>MODERATE | 51                  | 52  | - | - | MD <b>1.71 lower</b><br>(3.28 lower to 0.14 lower)<br><br><b>Favors vitamin D</b> |
| <b>WOMAC pain, 2 years (0-20, lower scores indicate improvement)</b>   |             |             |             |                      |      |                  |                     |     |   |   |                                                                                   |
| 146<br>(1 RCT)                                                         | not serious | not serious | not serious | serious <sup>c</sup> | none | ⊕⊕⊕○<br>MODERATE | 73                  | 73  | - | - | MD <b>0.85 lower</b><br>(2.1 lower to 0.4 higher)                                 |
| <b>WOMAC pain, 3 years (0-20, lower scores indicate improvement)</b>   |             |             |             |                      |      |                  |                     |     |   |   |                                                                                   |
| 474<br>(1 RCT)                                                         | not serious | not serious | not serious | serious <sup>c</sup> | none | ⊕⊕⊕○<br>MODERATE | 237                 | 237 | - | - | MD <b>0.79 lower</b><br>(2.31 lower to 0.73 higher)                               |

## Vitamin D compared to Placebo for Knee or Hip OA

| Certainty assessment                                                        |             |             |             |                      |      | Summary of findings |     |     |   |   |                                                                                      |
|-----------------------------------------------------------------------------|-------------|-------------|-------------|----------------------|------|---------------------|-----|-----|---|---|--------------------------------------------------------------------------------------|
| <b>WOMAC function, 6 months (0-1700, lower scores indicate improvement)</b> |             |             |             |                      |      |                     |     |     |   |   |                                                                                      |
| 413<br>(1 RCT)                                                              | not serious | not serious | not serious | not serious          | none | ⊕⊕⊕⊕<br>HIGH        | 204 | 209 | - | - | MD <b>72.9 lower</b><br>(126.05 lower to 19.75 lower)<br><br><b>Favors vitamin D</b> |
| <b>WOMAC function, 12 months (0-68, lower scores indicate improvement)</b>  |             |             |             |                      |      |                     |     |     |   |   |                                                                                      |
| 103<br>(1 RCT)                                                              | not serious | not serious | not serious | serious <sup>c</sup> | none | ⊕⊕⊕○<br>MODERATE    | 51  | 52  | - | - | MD <b>2.05 lower</b><br>(2.91 lower to 1.19 lower)<br><br><b>Favors vitamin D</b>    |
| <b>WOMAC function, 2 years (0-68, lower scores indicate improvement)</b>    |             |             |             |                      |      |                     |     |     |   |   |                                                                                      |
| 146<br>(1 RCT)                                                              | not serious | not serious | not serious | serious <sup>c</sup> | none | ⊕⊕⊕○<br>MODERATE    | 73  | 73  | - | - | MD <b>3.15 lower</b><br>(6.61 lower to 0.31 higher)                                  |
| <b>WOMAC function, 3 years (0-68, lower scores indicate improvement)</b>    |             |             |             |                      |      |                     |     |     |   |   |                                                                                      |

| Vitamin D compared to Placebo for Knee or Hip OA |             |             |             |                      |      |                  |                     |                   |                                  |               |                                                     |
|--------------------------------------------------|-------------|-------------|-------------|----------------------|------|------------------|---------------------|-------------------|----------------------------------|---------------|-----------------------------------------------------|
| Certainty assessment                             |             |             |             |                      |      |                  | Summary of findings |                   |                                  |               |                                                     |
| 474<br>(1 RCT)                                   | not serious | not serious | not serious | not serious          | none | ⊕⊕⊕⊕<br>HIGH     | 237                 | 237               | -                                | -             | MD <b>0.65 lower</b><br>(2.09 lower to 0.79 higher) |
| <b>SAE, 6 months</b>                             |             |             |             |                      |      |                  |                     |                   |                                  |               |                                                     |
| 413<br>(1 RCT)                                   | not serious | not serious | not serious | serious <sup>c</sup> | none | ⊕⊕⊕○<br>MODERATE | 7/204<br>(3.4%)     | 11/209<br>(5.3%)  | <b>OR 1.56</b><br>(0.59 to 4.12) | 34 per 1,000  | <b>18 more per 1,000</b><br>(14 fewer to 93 more)   |
| <b>SAE, 3 years</b>                              |             |             |             |                      |      |                  |                     |                   |                                  |               |                                                     |
| 474<br>(1 RCT)                                   | not serious | not serious | not serious | serious <sup>c</sup> | none | ⊕⊕⊕○<br>MODERATE | 64/237<br>(27.0%)   | 59/237<br>(24.9%) | <b>OR 0.90</b><br>(0.59 to 1.35) | 270 per 1,000 | <b>20 fewer per 1,000</b><br>(91 fewer to 63 more)  |

**CI:** Confidence interval; **MD:** Mean difference; **OR:** Odds ratio

## Explanations

- $I^2 = 82\%$
- Wide CI that includes possibility of no meaningful effect.
- Wide CI crossing line of no effect
- small sample size, wide 95% CI close to the line of no effect

## References:

1. Arden, N. K., Cro, S., Sheard, S., Dore, C. J., Bara, A., Tebbs, S. A.,... Keen, R. (2016). The effect of vitamin D supplementation on knee osteoarthritis, the VIDEO study: a randomised controlled trial. *Osteoarthritis Cartilage*, 24(11), 1858-1866. doi:10.1016/j.joca.2016.05.020
2. Jin, X., Jones, G., Cicuttini, F., Wluka, A., Zhu, Z., Han, W.,... Ding, C. (2016). Effect of Vitamin D Supplementation on Tibial Cartilage Volume and Knee Pain Among Patients With Symptomatic Knee Osteoarthritis: A Randomized Clinical Trial. *JAMA*, 315(10), 1005-1013. doi:10.1001/jama.2016.1961
3. McAlindon, T., LaValley, M., Schneider, E., Nuite, M., Lee, J. Y., Price, L. L.,... Dawson-Hughes, B. (2013). Effect of vitamin D supplementation on progression of knee pain and cartilage volume loss in patients with symptomatic osteoarthritis: a randomized controlled trial. *JAMA*, 309(2), 155-162. doi:10.1001/jama.2012.164487
4. Sanghi, D., Mishra, A., Sharma, A. C., Singh, A., Natu, S. M., Agarwal, S., & Srivastava, R. N. (2013). Does vitamin D improve osteoarthritis of the knee: a randomized controlled pilot trial. *Clin Orthop Relat Res*, 471(11), 3556-3562. doi:10.1007/s11999-013-3201-6

**PICO 72. Fish oil compared to no treatment in patients with knee or hip OA**

Summary. The literature searches identified one study that compared high-dose fish oil (4.5 g omega-3 fatty acids) 15 ml/day vs low-dose fish oil (0.45 g omega-3 fatty acids) 15 ml/day in patients with knee OA. At 2 year follow-up, WOMAC pain and function showed significantly greater improvement in the low dose group, although the difference is probably not clinically significant. Adverse events did not differ between groups.

Quality of evidence across all critical outcomes: Moderate

**Table 1. RCT data not suitable for effect size calculation**

| Author, year   | Study type       | Duration | Population Description | Treatment given to relevant population                                                                                | Results                                                                                                                                                                                                                                                                                                                                                                                                                                                                                                      |
|----------------|------------------|----------|------------------------|-----------------------------------------------------------------------------------------------------------------------|--------------------------------------------------------------------------------------------------------------------------------------------------------------------------------------------------------------------------------------------------------------------------------------------------------------------------------------------------------------------------------------------------------------------------------------------------------------------------------------------------------------|
| 3872 Hill 2016 | Double-blind RCT | 2 years  | 202 OA knee patients   | High-dose fish oil (4.5 g omega-3 fatty acids) 15 ml/day vs low-dose fish oil (0.45 g omega-3 fatty acids) 15 ml/day. | <p>WOMAC pain at 2 years (intention to treat analysis)<br/>High dose – low dose<br/>Adjusted Mean (SE): 3.1 (1.3), p=0.014</p> <p>WOMAC function at 2 years (intention to treat analysis)<br/>High dose – low dose<br/>Adjusted Mean (SE): 7.9 (4.0). p=0.046</p> <p>Adverse events were common and did not occur more frequently in either group. Serious adverse events were primarily non-elective hospital admissions (overall hospital admissions did not differ (37 in low-dose, 38 in high dose).</p> |

## References:

- Hill CL, March LM, Aitken D, Lester SE, Battersby R, Hynes K, et al. Fish oil in knee osteoarthritis: a randomised clinical trial of low dose versus high dose. *Ann Rheum Dis* 2016; 75:23-29.

### PICO 73: Anti-nerve growth factor vs. no treatment in hip or knee OA

Summary. This PICO was addressed by 8 RCTs [1-8]. Tanezumab (4 RCTs) showed a significant difference in WOMAC pain (p=0.01) and function (p=0.005) indicating improvement but not in pain during walking (VAS). Fulranumab (1 RCT) and Fasinumab (1 RCT) showed no difference in WOMAC pain (p=0.85 and p=0.77 respectively) or function (p=0.81 and p=0.74 respectively). In our meta-analysis of 7 RCTs, serious adverse events were slightly and significantly higher in the Anti-nerve growth factor arms compared to no treatment arms, but the finding was imprecise because of the wide 95% CI that nearly crossed the line of no effect. A literature search update in August 2018 identified an additional relevant RCT of tanezumab<sup>[9]</sup>, but the study did not alter the findings in the table below.

Quality of evidence across all critical outcomes: Moderate

| <b>Table 1. Anti-nerve growth factor compared to placebo for knee or hip OA</b>                  |                     |                      |                     |                      |                         |                                      |                            |                                      |                                 |                                     |                                                                           |
|--------------------------------------------------------------------------------------------------|---------------------|----------------------|---------------------|----------------------|-------------------------|--------------------------------------|----------------------------|--------------------------------------|---------------------------------|-------------------------------------|---------------------------------------------------------------------------|
| <b>Certainty assessment</b>                                                                      |                     |                      |                     |                      |                         |                                      | <b>Summary of findings</b> |                                      |                                 |                                     |                                                                           |
| <b>Nº of participants (studies) Follow-up</b>                                                    | <b>Risk of bias</b> | <b>Inconsistency</b> | <b>Indirectness</b> | <b>Imprecision</b>   | <b>Publication bias</b> | <b>Overall certainty of evidence</b> | <b>Number of Patients</b>  |                                      | <b>Relative effect (95% CI)</b> | <b>Anticipated absolute effects</b> |                                                                           |
|                                                                                                  |                     |                      |                     |                      |                         |                                      | <b>With placebo</b>        | <b>With Anti-nerve growth factor</b> |                                 | <b>Risk with placebo</b>            | <b>Risk difference with Anti-nerve growth factor</b>                      |
| <b>WOMAC pain, mean change at 16 to 24 wks followup (lower scores indicate improvement)</b>      |                     |                      |                     |                      |                         |                                      |                            |                                      |                                 |                                     |                                                                           |
| 1265 (6 RCTs)                                                                                    | not serious         | not serious          | not serious         | serious <sup>a</sup> | none                    | ⊕⊕⊕○<br>MODERATE                     | 625                        | 640                                  | -                               | -                                   | SMD <b>0.19 lower</b><br>(0.37 lower to 0.01 lower)<br><b>Favors ANGF</b> |
| <b>Pain during walking (VAS) change from baseline (0-100, lower scores indicate improvement)</b> |                     |                      |                     |                      |                         |                                      |                            |                                      |                                 |                                     |                                                                           |

**Table 1. Anti-nerve growth factor compared to placebo for knee or hip OA**

| Certainty assessment                                                                            |             |             |             |                      |      |                  | Summary of findings |                  |                                   |              |                                                                           |
|-------------------------------------------------------------------------------------------------|-------------|-------------|-------------|----------------------|------|------------------|---------------------|------------------|-----------------------------------|--------------|---------------------------------------------------------------------------|
| 29<br>(1 RCT)                                                                                   | not serious | not serious | not serious | serious <sup>b</sup> | none | ⊕⊕⊕○<br>MODERATE | 14                  | 15               | -                                 | -            | MD <b>4 lower</b><br>(20.08 lower to 12.08 higher)                        |
| <b>WOMAC function, mean change at 16 to 24 wks followup (lower scores indicate improvement)</b> |             |             |             |                      |      |                  |                     |                  |                                   |              |                                                                           |
| 1265<br>(6 RCTs)                                                                                | not serious | not serious | not serious | serious <sup>a</sup> | none | ⊕⊕⊕○<br>MODERATE | 625                 | 640              | -                                 | -            | SMD <b>0.24 lower</b><br>(0.46 lower to 0.01 lower)<br><b>Favors ANGF</b> |
| <b>SAEs (serious adverse events)</b>                                                            |             |             |             |                      |      |                  |                     |                  |                                   |              |                                                                           |
| 1387<br>(7 RCTs)                                                                                | not serious | not serious | not serious | serious <sup>a</sup> | none | ⊕⊕⊕○<br>MODERATE | 26/684<br>(3.8%)    | 43/703<br>(6.1%) | <b>OR 1.76</b><br>(1.04 to 2.99)  | 38 per 1,000 | <b>27 more per 1,000</b><br>(1 more to 68 more)<br><b>Favors placebo</b>  |
| <b>severe adverse events</b>                                                                    |             |             |             |                      |      |                  |                     |                  |                                   |              |                                                                           |
| 148<br>(1 RCT)                                                                                  | not serious | not serious | not serious | serious <sup>b</sup> | none | ⊕⊕⊕○<br>MODERATE | 2/74<br>(2.7%)      | 3/74<br>(4.1%)   | <b>OR 1.52</b><br>(0.25 to 9.38)  | 27 per 1,000 | <b>13 more per 1,000</b><br>(20 fewer to 180 more)                        |
| <b>osteonecrosis</b>                                                                            |             |             |             |                      |      |                  |                     |                  |                                   |              |                                                                           |
| 309<br>(1 RCT)                                                                                  | not serious | not serious | not serious | serious <sup>b</sup> | none | ⊕⊕⊕○<br>MODERATE | 0/155<br>(0.0%)     | 1/154<br>(0.6%)  | <b>OR 3.04</b><br>(0.12 to 75.18) | 0 per 1,000  | <b>0 fewer per 1,000</b><br>(0 fewer to 0 fewer)                          |

| Table 1. Anti-nerve growth factor compared to placebo for knee or hip OA |             |             |             |                      |      |                     |                 |                 |                                  |             |                                                  |
|--------------------------------------------------------------------------|-------------|-------------|-------------|----------------------|------|---------------------|-----------------|-----------------|----------------------------------|-------------|--------------------------------------------------|
| Certainty assessment                                                     |             |             |             |                      |      | Summary of findings |                 |                 |                                  |             |                                                  |
| clinically significant neurologic AE                                     |             |             |             |                      |      |                     |                 |                 |                                  |             |                                                  |
| 653<br>(2 studies)                                                       | not serious | not serious | not serious | serious <sup>b</sup> | none | ⊕⊕⊕○<br>MODERATE    | 2/327<br>(0.6%) | 2/326<br>(0.6%) | <b>OR 0.96</b><br>(0.14 to 6.57) | 6 per 1,000 | <b>0 fewer per 1,000</b><br>(5 fewer to 33 more) |

**CI:** Confidence interval; **SMD:** Standardised mean difference; **MD:** Mean difference; **OR:** Odds ratio

## Explanations

a. Very close to no effect line

b. Crosses no effect line

**Table 2. RevMan data not suitable for GRADEPro**

| Ref ID, Author, year | Study type       | Duration | Population Description     | Treatment given to relevant population                | Results                                                                                                                                                                                                                                                                                                                   |
|----------------------|------------------|----------|----------------------------|-------------------------------------------------------|---------------------------------------------------------------------------------------------------------------------------------------------------------------------------------------------------------------------------------------------------------------------------------------------------------------------------|
| 5173, Sanga, 2017    | Double blind RCT | 49 weeks | OA hip or knee<br>40-80y/o | Fulranumab 3mg Q4weeks<br>N=68<br><br>Placebo<br>N=59 | <p><b>WOMAC pain score</b><br/>Fulranumab 13 week = 71<br/>Fulranumab 25 week = 61<br/>Fulranumab 49 week = 45<br/><br/>Placebo 13 week = 66<br/>Placebo 25 week = 48<br/>Placebo 49 week = 40</p> <p><b>WOMAC function score</b><br/>Fulranumab 13 week = 71<br/>Fulranumab 25 week = 61<br/>Fulranumab 49 week = 45</p> |



|  |  |  |  |  |                                                                      |
|--|--|--|--|--|----------------------------------------------------------------------|
|  |  |  |  |  | Placebo 13 week = 66<br>Placebo 25 week = 48<br>Placebo 49 week = 40 |
|--|--|--|--|--|----------------------------------------------------------------------|

## References

1. Sanga P, Katz N, Polverejan E, Wang S, Kelly KM, Haeussler J, et al. Long-Term Safety and Efficacy of Fulranumab in Patients With Moderate-to-Severe Osteoarthritis Pain: A Phase II Randomized, Double-Blind, Placebo-Controlled Extension Study. *Arthritis Rheumatol.* 2017;69(4):763-773.
2. Tiseo PJ, Kivitz AJ, Ervin JE, Ren H, Mellis SJ. Fasinumab (REGN475), an antibody against nerve growth factor for the treatment of pain: results from a double-blind, placebo-controlled exploratory study in osteoarthritis of the knee. *Pain.* 2014;155(7):1245-1252.
3. Nagashima H, Suzuki M, Araki S, Yamabe T, Muto C, Tanezumab I. Preliminary assessment of the safety and efficacy of tanezumab in Japanese patients with moderate to severe osteoarthritis of the knee: a randomized, double-blind, dose-escalation, placebo-controlled study. *Osteoarthritis Cartilage.* 2011;19(12):1405-1412.
4. Brown MT, Murphy FT, Radin DM, Davignon I, Smith MD, West CR. Tanezumab reduces osteoarthritic hip pain: results of a randomized, double-blind, placebo-controlled phase III trial. *Arthritis Rheum.* 2013;65(7):1795-1803.
5. Lane NE, Schnitzer TJ, Birbara CA, Mokhtarani M, Shelton DL, Smith MD, et al. Tanezumab for the treatment of pain from osteoarthritis of the knee. *N Engl J Med.* 2010;363(16):1521-1531.
6. Brown MT, Murphy FT, Radin DM, Davignon I, Smith MD, West CR. Tanezumab reduces osteoarthritic knee pain: results of a randomized, double-blind, placebo-controlled phase III trial. *J Pain.* 2012;13(8):790-798.
7. Spierings EL, Fidelholtz J, Wolfram G, Smith MD, Brown MT, West CR. A phase III placebo- and oxycodone-controlled study of tanezumab in adults with osteoarthritis pain of the hip or knee. *Pain.* 2013;154(9):1603-1612.
8. Mayorga AJ, Wang S, Kelly KM, Thippawong J. Efficacy and safety of fulranumab as monotherapy in patients with moderate to severe, chronic knee pain of primary osteoarthritis: a randomised, placebo- and active-controlled trial. *Int J Clin Pract.* 2016;70(6):493-505.
9. Birbara C, Dabezies EJ Jr, Burr AM, Fountaine RJ, Smith MD, Brown MT, et al. Safety and efficacy of subcutaneous tanezumab in patients with knee or hip osteoarthritis. *J Pain Res.* 2018;11:151-164.

### PICO 74. Tumor necrosis factor inhibitor compared to no treatment in patients with knee or hip OA

Summary. The literature searches identified one RCT<sup>[1]</sup> and one observational comparative study<sup>[2]</sup> that indirectly addressed this question by comparing intra-articular TNFi knee injection (10 mg etanercept or adalimumab) to intra-articular HA injection (25 mg). A combined analysis revealed no significant between-group differences in VAS pain or WOMAC pain and function at 4 weeks post-injection. One study reported no

adverse events, while the RCT reported one serious adverse event (pulmonary infection) in the adalimumab group. However, all findings were inconclusive due to imprecision in the effect estimates.

Quality of evidence across all critical outcomes: Very low

| <b>TNF Inhibitor compared to HA for Knee OA</b> |                           |                      |                      |                      |                         |                                      |                            |                           |                                 |                                     |                                                       |
|-------------------------------------------------|---------------------------|----------------------|----------------------|----------------------|-------------------------|--------------------------------------|----------------------------|---------------------------|---------------------------------|-------------------------------------|-------------------------------------------------------|
| <b>Certainty assessment</b>                     |                           |                      |                      |                      |                         |                                      | <b>Summary of findings</b> |                           |                                 |                                     |                                                       |
| <b>Nº of participants (studies) Follow-up</b>   | <b>Risk of bias</b>       | <b>Inconsistency</b> | <b>Indirectness</b>  | <b>Imprecision</b>   | <b>Publication bias</b> | <b>Overall certainty of evidence</b> | <b>Number of patients</b>  |                           | <b>Relative effect (95% CI)</b> | <b>Anticipated absolute effects</b> |                                                       |
|                                                 |                           |                      |                      |                      |                         |                                      | <b>With HA</b>             | <b>With TNF Inhibitor</b> |                                 | <b>Risk with HA</b>                 | <b>Risk difference with TNF Inhibitor</b>             |
| <b>VAS pain (0-10, 4 weeks)</b>                 |                           |                      |                      |                      |                         |                                      |                            |                           |                                 |                                     |                                                       |
| 95 (1 RCT, 1 observational study)               | very serious <sup>a</sup> | not serious          | serious <sup>b</sup> | serious <sup>c</sup> | none                    | ⊕○○○<br>VERY LOW                     | 48                         | 47                        | -                               | -                                   | MD <b>1.68 lower</b><br>(4.31 lower to 0.95 higher)   |
| <b>WOMAC pain (0-20, 4 weeks)</b>               |                           |                      |                      |                      |                         |                                      |                            |                           |                                 |                                     |                                                       |
| 95 (1 RCT, 1 observational study)               | very serious <sup>a</sup> | not serious          | serious <sup>b</sup> | serious <sup>c</sup> | none                    | ⊕○○○<br>VERY LOW                     | 48                         | 47                        | -                               | -                                   | MD <b>3.68 lower</b><br>(8.27 lower to 0.91 higher)   |
| <b>WOMAC function (0-68, 4 weeks)</b>           |                           |                      |                      |                      |                         |                                      |                            |                           |                                 |                                     |                                                       |
| 95 (1 RCT, 1 observational study)               | very serious <sup>a</sup> | not serious          | serious <sup>b</sup> | serious <sup>c</sup> | none                    | ⊕○○○<br>VERY LOW                     | 48                         | 47                        | -                               | -                                   | MD <b>10.35 lower</b><br>(21.11 lower to 0.41 higher) |

| TNF Inhibitor compared to HA for Knee OA |                      |             |                      |                           |      |                     |                |                |                                   |             |                                                  |
|------------------------------------------|----------------------|-------------|----------------------|---------------------------|------|---------------------|----------------|----------------|-----------------------------------|-------------|--------------------------------------------------|
| Certainty assessment                     |                      |             |                      |                           |      | Summary of findings |                |                |                                   |             |                                                  |
| Serious adverse events                   |                      |             |                      |                           |      |                     |                |                |                                   |             |                                                  |
| 56<br>(1 RCT)                            | serious <sup>d</sup> | not serious | serious <sup>b</sup> | very serious <sup>e</sup> | none | ⊕○○○<br>VERY LOW    | 0/28<br>(0.0%) | 1/28<br>(3.6%) | <b>OR 3.11</b><br>(0.12 to 79.64) | 0 per 1,000 | <b>0 fewer per 1,000</b><br>(0 fewer to 0 fewer) |

**CI:** Confidence interval; **MD:** Mean difference; **OR:** Odds ratio

### Explanations

- One study not randomized, neither study blinded
- The comparator of interest is no treatment, not HA
- Wide 95% CI that overlaps line of no effect
- No blinding
- Only 1 event, extreme imprecision in effect estimate

### References

- Wang J. Efficacy and safety of adalimumab by intraarticular injection for moderate to severe knee osteoarthritis: An open-label randomized controlled trial. *J Int Med Res* 2018;46(1):326-334.
- Ohtori S, Orita S, Yamauchi K, Eguchi Y, Ochiai N, Kishida S, et al. Efficacy of direct injection of etanercept into knee joints for pain in moderate and severe knee osteoarthritis. *Yonsei Med J* 2015;56(5):1379-1383.

### PICO 75. Interleukin 1 receptor antagonist compared to no treatment for knee OA

**Summary.** Our searches identified one RCT that compared intra-articular injection of Anakinra to intra-articular saline injections in patients with knee OA.<sup>[1]</sup> Anakinra (150mg) did not show a significant difference from saline in terms of reducing VAS pain at 4 to 12 weeks, or in serious adverse event rates (see Table below). A lower dose of Anakinra (50 mg) showed similar results (data not shown).

Overall quality of evidence across all critical outcomes: Low

| <b>IL-1 compared to saline for knee OA</b>                                            |                     |                      |                     |                           |                         |                                      |                            |                  |                                   |                                     |                                                     |
|---------------------------------------------------------------------------------------|---------------------|----------------------|---------------------|---------------------------|-------------------------|--------------------------------------|----------------------------|------------------|-----------------------------------|-------------------------------------|-----------------------------------------------------|
| <b>Certainty assessment</b>                                                           |                     |                      |                     |                           |                         |                                      | <b>Summary of findings</b> |                  |                                   |                                     |                                                     |
| <b>№ of participants (studies) Follow-up</b>                                          | <b>Risk of bias</b> | <b>Inconsistency</b> | <b>Indirectness</b> | <b>Imprecision</b>        | <b>Publication bias</b> | <b>Overall certainty of evidence</b> | <b>Number of patients</b>  |                  | <b>Relative effect (95% CI)</b>   | <b>Anticipated absolute effects</b> |                                                     |
|                                                                                       |                     |                      |                     |                           |                         |                                      | <b>With saline</b>         | <b>With IL-1</b> |                                   | <b>Risk with saline</b>             | <b>Risk difference with IL-1</b>                    |
| <b>VAS pain at 4 weeks, change scores (0-100, lower scores indicate improvement)</b>  |                     |                      |                     |                           |                         |                                      |                            |                  |                                   |                                     |                                                     |
| 136 (1 RCT)                                                                           | not serious         | not serious          | not serious         | serious <sup>a</sup>      | none                    | ⊕⊕⊕○<br>MODERATE                     | 69                         | 67               | -                                 | -                                   | MD <b>4.5 lower</b><br>(13.53 lower to 4.53 higher) |
| <b>VAS pain at 12 weeks, change scores (0-100, lower scores indicate improvement)</b> |                     |                      |                     |                           |                         |                                      |                            |                  |                                   |                                     |                                                     |
| 136 (1 RCT)                                                                           | not serious         | not serious          | not serious         | serious <sup>a</sup>      | none                    | ⊕⊕⊕○<br>MODERATE                     | 69                         | 67               | -                                 | -                                   | MD <b>4.2 lower</b><br>(13.38 lower to 4.98 higher) |
| <b>SAEs</b>                                                                           |                     |                      |                     |                           |                         |                                      |                            |                  |                                   |                                     |                                                     |
| 136 (1 RCT)                                                                           | not serious         | not serious          | not serious         | very serious <sup>b</sup> | none                    | ⊕⊕○○<br>LOW                          | 1/69 (1.4%)                | 1/67 (1.5%)      | <b>OR 1.03</b><br>(0.06 to 16.82) | 14 per 1,000                        | <b>1 more per 1,000</b><br>(13 fewer to 235 more)   |

**CI:** Confidence interval; **MD:** Mean difference; **OR:** Odds ratio

## Explanations

- Wide 95% CI that overlaps line of no effect
- Very wide CI and very few events

## References

1. Chevalier X1, Goupille P, Beaulieu AD, Burch FX, Bensen WG, Conrozier T, et al. Intraarticular injection of anakinra in osteoarthritis of the knee: a multicenter, randomized, double-blind, placebo-controlled study. *Arthritis Rheum.* 2009 Mar 15;61(3):344-352.

### **PICO 76. NSAIDs compared to acetaminophen for patients with knee and/or hip OA**

Summary: Fifteen RCTs met inclusion criteria for this comparison. Pain (Table 1): There was heterogeneity among RCTs comparing pain and function with oral nsaid vs acetaminophen with respect to how pain was assessed. In summary, RCTs evaluating pain level post intervention found lower statistically significant WOMAC pain<sup>1</sup> with oral nsaid use compared to acetaminophen use, but not significantly when pain level was assessed by KOOS<sup>2</sup> or VAS at movement.<sup>3</sup> When change in pain from baseline was assessed, there was insignificant lower pain with oral nsaid use when measured by WOMAC<sup>4-6</sup> or HAQ pain<sup>7,8</sup> scale but significantly lower pain when assessed using VAS pain scale<sup>9</sup>. While the majority of the evidence comes from RCTs that were double blinded, the major limitation of these studies was lack of a description of allocation concealment which can introduce bias. An RCT assessing pain using a different pain scale (0-4) with activity and rest found naproxen use with greater improvement than acetaminophen (Table 3).<sup>10</sup> In another RCT, lower mean WOMAC pain level was noted for rofecoxib (cox-2 inhibitor) 25mg use compared to acetaminophen but no SD or Confidence Interval (CI) were provided which limited the interpretation of this study.<sup>11</sup> Similarly, greater improvement in WOMAC pain was reported by another study with rofecoxib 25 mg use compared to acetaminophen but again without SD or CI, results could not be interpreted.<sup>12</sup>

Function (Table 1): RCTs assessing self-report function post intervention with oral nsaid vs acetaminophen found a significantly improved function level with nsaid use when assessed using WOMAC<sup>1</sup> but not when using KOOS<sup>2</sup>. When assessing change in function from baseline, greater improvement in WOMAC score was reported with nsaid use, although results did not reach statistical significance<sup>4-6</sup>. No meaningful change in function was noted when assessed using HAQ<sup>7,8</sup>. When function was assessed objectively, no between-group difference was noted for 50 meter walk time.<sup>3</sup>

Adverse events (Table 1): One RCT found no significant between-group difference in the risk of serious adverse effects, gastrointestinal or cardiovascular side effects,<sup>10</sup> but the study was underpowered to detect a statistically significant difference. Another study that was not included in this evidence table reported greater serious adverse effects with acetaminophen and rofecoxib 25mg compared to celecoxib and rofecoxib 12.5mg. This study also reported no difference in cardiovascular adverse effects between any of the 4 groups (acetaminophen, celecoxib, rofecoxib 12.5mg and rofecoxib 25mg)(Table 2).<sup>13</sup>

Quality of evidence across all critical outcomes: Low

**Table 1: NSAIDS compared to acetaminophen pain and function outcomes for patients with knee or hip OA**

| Certainty assessment                                                              |                      |               |              |                      |                  |                               | Summary of findings                           |             |                          |                                                    |                                                                                |
|-----------------------------------------------------------------------------------|----------------------|---------------|--------------|----------------------|------------------|-------------------------------|-----------------------------------------------|-------------|--------------------------|----------------------------------------------------|--------------------------------------------------------------------------------|
| No of participants (studies) Follow-up                                            | Risk of bias         | Inconsistency | Indirectness | Imprecision          | Publication bias | Overall certainty of evidence | Number of participants                        |             | Relative effect (95% CI) | Anticipated absolute effects                       |                                                                                |
|                                                                                   |                      |               |              |                      |                  |                               | With acetaminophen pain and function outcomes | With NSAIDS |                          | Risk with acetaminophen pain and function outcomes | Risk difference with NSAIDS                                                    |
| <b>WOMAC pain (mean, post)(0-100, lower scores indicate improvement)</b>          |                      |               |              |                      |                  |                               |                                               |             |                          |                                                    |                                                                                |
| 217 (1 RCT)                                                                       | serious <sup>a</sup> | not serious   | not serious  | not serious          | none             | ⊕⊕⊕○<br>MODERATE              | 109                                           | 108         | -                        | -                                                  | MD <b>8.5 lower</b><br>(13.16 lower to 3.84 lower)<br><br><b>Favors NSAIDs</b> |
| <b>WOMAC pain (mean change from baseline)(lower scores indicate improvement)</b>  |                      |               |              |                      |                  |                               |                                               |             |                          |                                                    |                                                                                |
| 543 (3 RCTs)                                                                      | serious <sup>a</sup> | not serious   | not serious  | not serious          | none             | ⊕⊕⊕○<br>MODERATE              | 259                                           | 284         | -                        | -                                                  | SMD <b>0.14 lower</b><br>(0.31 lower to 0.02 higher)                           |
| <b>KOOS pain (mean, post)(0-100, higher scores indicate improvement)</b>          |                      |               |              |                      |                  |                               |                                               |             |                          |                                                    |                                                                                |
| 104 (1 RCT)                                                                       | serious <sup>b</sup> | not serious   | not serious  | serious <sup>c</sup> | none             | ⊕⊕○○<br>LOW                   | 52                                            | 52          | -                        | -                                                  | MD <b>2.6 higher</b><br>(5.17 lower to 10.37 higher)                           |
| <b>VAS pain on movement (mean, post)(0-20, lower scores indicate improvement)</b> |                      |               |              |                      |                  |                               |                                               |             |                          |                                                    |                                                                                |

|                                                                                       |                      |             |             |             |      |                  |     |     |   |   |                                                                                |
|---------------------------------------------------------------------------------------|----------------------|-------------|-------------|-------------|------|------------------|-----|-----|---|---|--------------------------------------------------------------------------------|
| 178<br>(1 RCT)                                                                        | serious <sup>a</sup> | not serious | not serious | not serious | none | ⊕⊕⊕○<br>MODERATE | 88  | 90  | - | - | MD <b>0.21 higher</b><br>(0.66 lower to 1.08 higher)                           |
| <b>VAS pain (mean change from baseline)(0-100, lower scores indicate improvement)</b> |                      |             |             |             |      |                  |     |     |   |   |                                                                                |
| 839<br>(2 RCTs)                                                                       | serious <sup>a</sup> | not serious | not serious | not serious | none | ⊕⊕⊕○<br>MODERATE | 368 | 471 | - | - | MD <b>5.6 lower</b><br>(8.15 lower to 3.05 lower)<br><br><b>Favors NSAIDs</b>  |
| <b>HAQ pain mean change (lower scores indicate improvement)</b>                       |                      |             |             |             |      |                  |     |     |   |   |                                                                                |
| 207<br>(2 RCTs)                                                                       | serious <sup>a</sup> | not serious | not serious | not serious | none | ⊕⊕⊕○<br>MODERATE | 104 | 103 | - | - | MD <b>0.06 lower</b><br>(0.29 lower to 0.16 higher)                            |
| <b>WOMAC function (mean, post)(0-100, lower scores indicate improvement)</b>          |                      |             |             |             |      |                  |     |     |   |   |                                                                                |
| 217<br>(1 RCT)                                                                        | serious <sup>a</sup> | not serious | not serious | not serious | none | ⊕⊕⊕○<br>MODERATE | 109 | 108 | - | - | MD <b>7.5 lower</b><br>(11.51 lower to 3.49 lower)<br><br><b>Favors NSAIDs</b> |
| <b>WOMAC function (mean change from baseline)(lower scores indicate improvement)</b>  |                      |             |             |             |      |                  |     |     |   |   |                                                                                |
| 536<br>(3 RCTs)                                                                       | serious <sup>a</sup> | not serious | not serious | not serious | none | ⊕⊕⊕○<br>MODERATE | 256 | 280 | - | - | SMD <b>0.20 lower</b><br>(0.47 lower to 0.06 higher)                           |

| <b>KOOS function (mean, post)(0-100, higher scores indicate improvement)</b> |                      |             |             |                      |      |                  |                   |                   |                                  |               |                                                      |
|------------------------------------------------------------------------------|----------------------|-------------|-------------|----------------------|------|------------------|-------------------|-------------------|----------------------------------|---------------|------------------------------------------------------|
| 104<br>(1 RCT)                                                               | serious <sup>b</sup> | not serious | not serious | serious <sup>c</sup> | none | ⊕⊕○○<br>LOW      | 52                | 52                | -                                | -             | MD <b>3 higher</b><br>(4.63 lower to 10.63 higher)   |
| <b>HAQ disability (mean change)(lower scores indicate improvement)</b>       |                      |             |             |                      |      |                  |                   |                   |                                  |               |                                                      |
| 207<br>(2 RCTs)                                                              | serious <sup>a</sup> | not serious | not serious | not serious          | none | ⊕⊕⊕○<br>MODERATE | 104               | 103               | -                                | -             | MD <b>0.06 higher</b><br>(0.05 lower to 0.17 higher) |
| <b>50 meter walk time (lower scores indicate improvement)</b>                |                      |             |             |                      |      |                  |                   |                   |                                  |               |                                                      |
| 178<br>(1 RCT)                                                               | serious <sup>a</sup> | not serious | not serious | serious <sup>d</sup> | none | ⊕⊕○○<br>LOW      | 88                | 90                | -                                | -             | MD <b>0.01 higher</b><br>(2.61 lower to 2.63 higher) |
| <b>Serious adverse effects (n/N)</b>                                         |                      |             |             |                      |      |                  |                   |                   |                                  |               |                                                      |
| 309<br>(1 RCT)                                                               | serious <sup>a</sup> | not serious | not serious | serious <sup>c</sup> | none | ⊕⊕○○<br>LOW      | 10/148<br>(6.8%)  | 7/161<br>(4.3%)   | <b>OR 0.63</b><br>(0.23 to 1.69) | 68 per 1,000  | <b>24 fewer per 1,000</b><br>(51 fewer to 42 more)   |
| <b>GI side effects</b>                                                       |                      |             |             |                      |      |                  |                   |                   |                                  |               |                                                      |
| 309<br>(1 RCT)                                                               | serious <sup>a</sup> | not serious | not serious | serious <sup>c</sup> | none | ⊕⊕○○<br>LOW      | 31/148<br>(20.9%) | 39/161<br>(24.2%) | <b>RR 1.16</b><br>(0.76 to 1.75) | 209 per 1,000 | <b>34 more per 1,000</b><br>(50 fewer to 157 more)   |
| <b>Cardiac side effects</b>                                                  |                      |             |             |                      |      |                  |                   |                   |                                  |               |                                                      |



|                |                      |             |             |                      |      |             |              |                 |                                     |             |                                                         |
|----------------|----------------------|-------------|-------------|----------------------|------|-------------|--------------|-----------------|-------------------------------------|-------------|---------------------------------------------------------|
| 309<br>(1 RCT) | serious <sup>a</sup> | not serious | not serious | serious <sup>c</sup> | none | ⊕⊕○○<br>LOW | 1/148 (0.7%) | 0/161<br>(0.0%) | <b>OR 0.30</b><br>(0.01 to<br>7.53) | 7 per 1,000 | <b>5 fewer per<br/>1,000</b><br>(7 fewer to 42<br>more) |
|----------------|----------------------|-------------|-------------|----------------------|------|-------------|--------------|-----------------|-------------------------------------|-------------|---------------------------------------------------------|

**CI:** Confidence interval; **MD:** Mean difference

## Explanations

- a. Allocation concealment not described
- b. Blinding not described
- c. Wide CI that crosses line of no effect
- d. Not statistically significant, small effect estimate

**Table 2. RCT data not suitable for effect size calculation or combining with other data**

| Ref ID,<br>Author, year | Study<br>type | Duration | Population Description                                                                                                                                                                                                                                                                                             | Treatment given to<br>relevant population                                                                            | Results                                                                                                                                                                                                                                                                                                                                                                                                                                                                                       |
|-------------------------|---------------|----------|--------------------------------------------------------------------------------------------------------------------------------------------------------------------------------------------------------------------------------------------------------------------------------------------------------------------|----------------------------------------------------------------------------------------------------------------------|-----------------------------------------------------------------------------------------------------------------------------------------------------------------------------------------------------------------------------------------------------------------------------------------------------------------------------------------------------------------------------------------------------------------------------------------------------------------------------------------------|
| PICO76_123<br>1_Bradley | RCT           | 4 week   | Knee OA participants:<br><u>Group 1:</u> n=61, mean<br>age 55.7 (13.7), mean<br>weight 92.5 (22.8), 71 %<br>females<br><u>Group 2:</u> n=62, mean<br>age 56.7 (11.2), mean<br>weight 94.5 (21.4), 79%<br>females<br><u>Group 3:</u> n=61, mean<br>age 57.2 (11.7), mean<br>weight in Kg 92.8 (22.8),<br>74% female | Group 1: ibuprofen<br>2400/day<br><br>Group 2: ibuprofen 1200<br>mg/day<br><br>Group 3: acetaminophen<br>4000 mg/day | <b>Mean change in HAQ pain score:</b><br><b>Group 1:</b> 0.35 (0.13 to 0.57)<br><b>Group 2:</b> 0.30 (0.09 to 0.51)<br><b>Group 3:</b> 0.33 (0.14 to 0.52)<br><b>Mean change in walking pain score:</b><br><b>Group 1:</b> 0.45 (0.21 to 0.69)<br><b>Group 2:</b> 0.31 (0.10 to 0.51)<br><b>Group 3:</b> 0.13 (-0.06 to 0.32)<br><b>Mean change in rest pain score:</b><br><b>Group 1:</b> 0.40 (0.13 to 0.66)<br><b>Group 2:</b> 0.33 (0.25 to 0.50)<br><b>Group 3:</b> 0.06 (-0.08 to 0.19) |

|                     |     |         |                                                                                                                                                                                                                                                                             |                                                                                                                                                         |                                                                                                                                                                                                                                                                                                                                                                                                                                                                                                                                                 |
|---------------------|-----|---------|-----------------------------------------------------------------------------------------------------------------------------------------------------------------------------------------------------------------------------------------------------------------------------|---------------------------------------------------------------------------------------------------------------------------------------------------------|-------------------------------------------------------------------------------------------------------------------------------------------------------------------------------------------------------------------------------------------------------------------------------------------------------------------------------------------------------------------------------------------------------------------------------------------------------------------------------------------------------------------------------------------------|
|                     |     |         |                                                                                                                                                                                                                                                                             |                                                                                                                                                         | <b>Mean change in HAQ disability score:</b><br><b>Group 1:</b> 0.11 (-0.02 to 0.23)<br><b>Group 2:</b> 0.08 (-0.01 to 0.16)<br><b>Group 3:</b> 0.08 (0.00 to 0.16)                                                                                                                                                                                                                                                                                                                                                                              |
| PICO76_13_Schnitzer | RCT | 4 weeks | Knee OA participants:<br><u>Group 1:</u> n=126 mean age 60.9 (10.8), 59.5% female, mean bmi 32.4 (7.7)<br><u>Group 2:</u> n=129, mean age 60.8 (10.2), 62.8% female, mean bmi 33.0 (7.2)<br><u>Group 3:</u> n=121, mean age 57.5 (11.5), 65.3 % female, mean bmi 33.7 (9.0) | Group 1: extended release acetaminophen 1300 mg three times daily<br><br>Group 2: rofecoxib 12.5mg once daily<br><br>Group 3: rofecoxib 25mg once daily | <b>EFFICACY:</b><br><b>Mean and mean change in WOMAC pain, NO SD or 95% CI provided:</b><br><b>Group 1:</b> 150.35, 140.89<br><b>Group 2:</b> 136.25, 147.64<br><b>Group 3:</b> 127.98, 184.42<br><b>Mean and mean change in WOMAC pain, NO SD or 95% CI provided:</b><br><b>Group 1:</b> 530.63, 448.32<br><b>Group 2:</b> 513.36, 470.95<br><b>Group 3:</b> 465.84, 598.74<br><br><b>SAFETY:</b><br><b>Adverse events n (%):</b><br><b>Group 1:</b> 59 (43.4) , no MI<br><b>Group 2:</b> 58 (42.0), 2 MIs<br><b>Group 3:</b> 55 (42.6), no MI |
| PICO76_263_Shen     | RCT | 3 month | <u>Group 1:</u> n=10, age 60–77 yr, 4 males, 6 females<br><u>Group 2:</u> n=10, age 48–80 yr, 4 males, 6 females                                                                                                                                                            | Group 1: acetaminophen up to 4 g/day<br><br>Group 2: rofecoxib 25 mg/day                                                                                | <b>Change in mean WOMAC pain (NO SD or 95% CI provided):</b><br><b>Group 1:</b> –0.74<br><b>Group 2:</b> –1.12<br><b>Change in mean WOMAC activity (NO SD or 95% CI provided):</b><br><b>Group 1:</b> –1.06<br><b>Group 2:</b> –0.98<br>NO safety data provided                                                                                                                                                                                                                                                                                 |
| PICO76_276_Golden   | RCT |         | 464 adult patients, aged 25 years or older (87.1% aged 45 years or older), with knee OA                                                                                                                                                                                     | <u>Group 1:</u> 220mg naproxen sodium three times daily (patients aged                                                                                  | <b>Difference in pain at rest (0-4 points) from baseline:</b><br><b>Group 1:</b> 0.5<br><b>Group 2:</b> 0.2<br><b>Group 3:</b> 0.2                                                                                                                                                                                                                                                                                                                                                                                                              |

|                       |                            |        |                                                                                                                                                                                                                                         |                                                                                                                                                                                                     |                                                                                                                                                                                                                                                                                                                                                                                                                                                                |
|-----------------------|----------------------------|--------|-----------------------------------------------------------------------------------------------------------------------------------------------------------------------------------------------------------------------------------------|-----------------------------------------------------------------------------------------------------------------------------------------------------------------------------------------------------|----------------------------------------------------------------------------------------------------------------------------------------------------------------------------------------------------------------------------------------------------------------------------------------------------------------------------------------------------------------------------------------------------------------------------------------------------------------|
|                       |                            |        |                                                                                                                                                                                                                                         | 65 years and older took 220 mg twice daily)<br><u>Group 2:</u> 1000mg acetaminophen four times daily<br><u>Group 3:</u> placebo four times daily                                                    | P for group 1 vs group 2 and group 1 vs group 3 <0.05<br><b>Difference in pain with weight bearing:</b><br><b>Group 1:</b> 1.0<br><b>Group 2:</b> 0.9<br><b>Group 3:</b> 0.7<br>P for the above comparisons is <0.01                                                                                                                                                                                                                                           |
| PICO76_3465_Geba      | RCT                        | 6 week | <u>Group 1:</u> mean age 63.1 (10.90), 70.2% females<br><u>Group 2:</u> mean age 62.6 (11.03), 64.9% females<br><u>Group 3:</u> mean age 63.4 (10.40), 65.6% females<br><br><u>Group 4:</u> mean age 61.3 (10.93), 72.6% females        | Group 1:Acetaminophen, 4000 mg/d (n = 94)<br><br>Group 2:Celecoxib, 200 mg/d (n = 97)<br><br>Group 3:Rofecoxib 12.5 mg/d (n = 96);<br><br>Group 4:Rofecoxib, 25 mg/d (n = 95)                       | <b>Change in mean WOMAC pain (95% CI)subscale score:</b><br><b>Group 1 :</b> -24.9 (-29.5 to -20.3)<br><b>Group 2:</b> -28.6 (-33.2 to -24)<br><b>Group 3:</b> -28.0 (-33.6 to -23.4)<br><b>Group 4:</b> -35.4 (-40.0 to -30.8)<br><br>Change in mean WOMAC function (95%CI) subscale:<br><b>Group 1 :</b> -19.5 (-24.1 to -14.9)<br><b>Group 2:</b> -24.9 (-29.3 to -20.5)<br><b>Group 3:</b> -24.3 (-28.7 to -9.9)<br><b>Group 4:</b> -29.7 (-34.1 to -25.3) |
| PICO76_3466_Schnitzer | RCT pooled VACT1 and VACT2 |        | <u>Group 1:</u> mean age 61.9 (10.70), % female 66.2<br><br><u>Group 1:</u> Mean age 61.4 (9.89), % female 68.1<br><br><u>Group 3:</u> Mean age 62.8 (10.80), % female 65.3<br><br><u>Group 4:</u> Mean age 62.7 (10.34), % female 68.3 | Group 1 (n= 269): acetaminophen (4000 mg, 1000 mg qid)<br><br>Group 2 (n=523): celecoxib (200 mg/day)<br><br>Group 3 (n=259): rofecoxib (12.5 mg/day)<br><br>Group 4 (n=527): rofecoxib (25 mg/day) | <b>Change in mean WOMAC pain (No SD or 95% CI provided) subscale score from the pooled study:</b><br><b>Group 1 :</b> -24.7<br><b>Group 2:</b> -29.4<br><b>Group 3:</b> -30.8<br><b>Group 4:</b> -33.0<br><b>Change in mean WOMAC function (No SD or 95% CI provided) subscale score from the pooled study:</b><br><b>Group 1 :</b> -19.9<br><b>Group 2:</b> -25.6<br><b>Group 3:</b> -26.7<br><b>Group 4:</b> -28.8<br><br><b>SAFETY:</b>                     |

|  |  |  |  |  |                                                                                                                                                                                                                                                                                                                                                                                                                                                                                                                                                                                                                                                                                                                                                                                                                                                                                                                                                                                             |
|--|--|--|--|--|---------------------------------------------------------------------------------------------------------------------------------------------------------------------------------------------------------------------------------------------------------------------------------------------------------------------------------------------------------------------------------------------------------------------------------------------------------------------------------------------------------------------------------------------------------------------------------------------------------------------------------------------------------------------------------------------------------------------------------------------------------------------------------------------------------------------------------------------------------------------------------------------------------------------------------------------------------------------------------------------|
|  |  |  |  |  | <p>AE: Significantly more rofecoxib 25 mg (6.3%) and acetaminophen (7.4%) patients than celecoxib patients (2.7%; <math>p &lt; 0.05</math>) discontinued due to an AE, while rofecoxib 12.5 mg (5.4%) was not significantly different from celecoxib.</p> <p>EDEMA: No significant differences between acetaminophen (0.6%), celecoxib (0%), rofecoxib 12.5 mg (0%), and rofecoxib 25 mg (0.6%) in discontinuations due to edema or related AE.</p> <p>HYPERTENSION: No significant differences between acetaminophen (0.8%), celecoxib (0%), rofecoxib 12.5 mg (0.6%), and rofecoxib 25 mg (0.2%) in discontinuations due to hypertension related AE.</p> <p>CVD: The acetaminophen, celecoxib, rofecoxib 12.5 mg, and rofecoxib 25 mg treatment groups experienced a similar incidence of cardiovascular system AE (4.7%, 3.5%, 3.7%, and 3.2%, respectively) including events classified by the investigator specifically as hypertension (1.1%, 1.0%, 0.8%, and 0.8%, respectively)</p> |
|--|--|--|--|--|---------------------------------------------------------------------------------------------------------------------------------------------------------------------------------------------------------------------------------------------------------------------------------------------------------------------------------------------------------------------------------------------------------------------------------------------------------------------------------------------------------------------------------------------------------------------------------------------------------------------------------------------------------------------------------------------------------------------------------------------------------------------------------------------------------------------------------------------------------------------------------------------------------------------------------------------------------------------------------------------|

## References

1. Boureau F, Schneid H, Zeghari N, Wall R, Bourgeois P. The IPSO study: ibuprofen, paracetamol study in osteoarthritis. A randomised comparative clinical study comparing the efficacy and safety of ibuprofen and paracetamol analgesic treatment of osteoarthritis of the knee or hip. *Ann Rheum Dis* 2004;63:1028-34.
2. Verkleij SP, Luijsterburg PA, Willemsen SP, Koes BW, Bohnen AM, Bierma-Zeinstra SM. Effectiveness of diclofenac versus paracetamol in knee osteoarthritis: a randomised controlled trial in primary care. *Br J Gen Pract* 2015;65:e530-7.
3. Williams HJ, Ward JR, Egger MJ, et al. Comparison of naproxen and acetaminophen in a two-year study of treatment of osteoarthritis of the knee. *Arthritis Rheum* 1993;36:1196-206.
4. Geba GP, Weaver AL, Polis AB, Dixon ME, Schnitzer TJ, Vioxx ACTG. Efficacy of rofecoxib, celecoxib, and acetaminophen in osteoarthritis of the knee: a randomized trial. *JAMA* 2002;287:64-71.

5. Case JP, Baliunas AJ, Block JA. Lack of efficacy of acetaminophen in treating symptomatic knee osteoarthritis: a randomized, double-blind, placebo-controlled comparison trial with diclofenac sodium. *Arch Intern Med* 2003;163:169-78.
6. Doherty M, Hawkey C, Goulder M, et al. A randomised controlled trial of ibuprofen, paracetamol or a combination tablet of ibuprofen/paracetamol in community-derived people with knee pain. *Ann Rheum Dis* 2011;70:1534-41.
7. Bradley JD, Brandt KD, Katz BP, Kalasinski LA, Ryan SI. Comparison of an antiinflammatory dose of ibuprofen, an analgesic dose of ibuprofen, and acetaminophen in the treatment of patients with osteoarthritis of the knee. *N Engl J Med* 1991;325:87-91.
8. Bradley JD, Brandt KD, Katz BP, Kalasinski LA, Ryan SI. Treatment of knee osteoarthritis: relationship of clinical features of joint inflammation to the response to a nonsteroidal antiinflammatory drug or pure analgesic. *J Rheumatol* 1992;19:1950-4.
9. Pincus T, Koch G, Lei H, et al. Patient Preference for Placebo, Acetaminophen (paracetamol) or Celecoxib Efficacy Studies (PACES): two randomised, double blind, placebo controlled, crossover clinical trials in patients with knee or hip osteoarthritis. *Ann Rheum Dis* 2004;63:931-9.
10. Golden HE, Moskowitz RW, Minic M. Analgesic efficacy and safety of nonprescription doses of naproxen sodium compared with acetaminophen in the treatment of osteoarthritis of the knee. *Am J Ther* 2004;11:85-94.
11. Schnitzer TJ, Tesser JR, Cooper KM, Altman RD. A 4-week randomized study of acetaminophen extended-release vs rofecoxib in knee osteoarthritis. *Osteoarthritis Cartilage* 2009;17:1-7.
12. Shen H, Sprott H, Aeschlimann A, et al. Analgesic action of acetaminophen in symptomatic osteoarthritis of the knee. *Rheumatology (Oxford)* 2006;45:765-70.
13. Schnitzer TJ, Weaver AL, Polis AB, et al. Efficacy of rofecoxib, celecoxib, and acetaminophen in patients with osteoarthritis of the knee. A combined analysis of the VACT studies. *J Rheumatol* 2005;32:1093-105.

#### **PICO 77. Bisphosphonates compared to oral NSAIDs in patients with knee or hip OA**

Summary. The literature searches did not identify any studies that addressed this question.

Quality of evidence across all critical outcomes: Very low

#### **PICO 78. Duloxetine compared to oral NSAIDs for knee or hip OA**

Summary. Our searches identified one RCT that indirectly addressed this comparison. Frakes et al. randomized 524 patients with knee OA to receive either flexible-dose duloxetine (60/120 mg per day) plus oral NSAIDs or placebo plus oral NSAIDs.<sup>[1]</sup> At 8 weeks, the study found a significant between-group difference in WOMAC pain and function improvement favoring duloxetine plus oral NSAIDs over oral NSAIDs alone. The rate of serious adverse events did not differ significantly between groups, although imprecision in the effect estimate means that the findings for this outcome are inconclusive.

Quality of evidence across all critical outcomes: Very low

| <b>Duloxetine plus oral NSAIDs compared to placebo plus oral NSAIDs for knee OA</b>   |                      |                      |                      |                    |                         |                                      |                                      |                                         |                                 |                                           |                                                                                              |
|---------------------------------------------------------------------------------------|----------------------|----------------------|----------------------|--------------------|-------------------------|--------------------------------------|--------------------------------------|-----------------------------------------|---------------------------------|-------------------------------------------|----------------------------------------------------------------------------------------------|
| <b>Certainty assessment</b>                                                           |                      |                      |                      |                    |                         |                                      | <b>Summary of findings</b>           |                                         |                                 |                                           |                                                                                              |
| <b>Nº of participants (studies) Follow-up</b>                                         | <b>Risk of bias</b>  | <b>Inconsistency</b> | <b>Indirectness</b>  | <b>Imprecision</b> | <b>Publication bias</b> | <b>Overall certainty of evidence</b> | <b>Number of patients</b>            |                                         | <b>Relative effect (95% CI)</b> | <b>Anticipated absolute effects</b>       |                                                                                              |
|                                                                                       |                      |                      |                      |                    |                         |                                      | <b>With placebo plus oral NSAIDs</b> | <b>With duloxetine plus oral NSAIDs</b> |                                 | <b>Risk with placebo plus oral NSAIDs</b> | <b>Risk difference with duloxetine plus oral NSAIDs</b>                                      |
| <b>WOMAC pain at 8 wk change score (0-100, lower scores indicate improvement)</b>     |                      |                      |                      |                    |                         |                                      |                                      |                                         |                                 |                                           |                                                                                              |
| 514 (1 RCT)                                                                           | serious <sup>a</sup> | not serious          | serious <sup>b</sup> | not serious        | none                    | ⊕⊕○○<br>LOW                          | 256                                  | 258                                     | -                               | -                                         | MD <b>6.45 lower</b><br>(9.57 lower to 3.33 lower)<br><br><b>Favors duloxetine + NSAIDs</b>  |
| <b>WOMAC function change score at wk 8 (0-100, lower scores indicate improvement)</b> |                      |                      |                      |                    |                         |                                      |                                      |                                         |                                 |                                           |                                                                                              |
| 504 (1 RCT)                                                                           | serious <sup>a</sup> | not serious          | serious <sup>b</sup> | not serious        | none                    | ⊕⊕○○<br>LOW                          | 253                                  | 251                                     | -                               | -                                         | MD <b>7.29 lower</b><br>(10.42 lower to 4.16 lower)<br><br><b>Favors duloxetine + NSAIDs</b> |

| <b>Duloxetine plus oral NSAIDs compared to placebo plus oral NSAIDs for knee OA</b> |                      |             |                      |                      |      |                            |                 |                 |                                  |              |                                                 |
|-------------------------------------------------------------------------------------|----------------------|-------------|----------------------|----------------------|------|----------------------------|-----------------|-----------------|----------------------------------|--------------|-------------------------------------------------|
| <b>Certainty assessment</b>                                                         |                      |             |                      |                      |      | <b>Summary of findings</b> |                 |                 |                                  |              |                                                 |
| <b>SAEs</b>                                                                         |                      |             |                      |                      |      |                            |                 |                 |                                  |              |                                                 |
| 524<br>(1 RCT)                                                                      | serious <sup>a</sup> | not serious | serious <sup>b</sup> | serious <sup>c</sup> | none | ⊕○○○<br>○<br>VERY LOW      | 3/260<br>(1.2%) | 5/264<br>(1.9%) | <b>OR 1.65</b><br>(0.39 to 6.99) | 12 per 1,000 | <b>7 more per 1,000</b><br>(7 fewer to 64 more) |

**CI:** Confidence interval; **MD:** Mean difference; **OR:** Odds ratio

## Explanations

- a. 26% attrition, randomization method and allocation concealment not reported
- b. Both groups received NSAIDs
- c. Wide 95% CI that overlaps line of no effect

## References

1. Frakes EP, Risser RC, Ball TD, Hochberg MC, Wohlreich MM. Duloxetine added to oral nonsteroidal anti-inflammatory drugs for treatment of knee pain due to osteoarthritis: results of a randomized, double-blind, placebo-controlled trial. *Curr Med Res Opin.* 2011;27(12):2361-2372.

### **PICO 79. Other serotonin norepinephrine inhibitors compared to oral NSAIDs in patients with knee or hip OA**

Summary. The literature searches did not identify any studies that addressed this question.

Quality of evidence across all critical outcomes: Very low

**PICO 80. Tricyclic antidepressants compared to oral NSAIDs in patients with knee or hip OA**

Summary. The literature searches did not identify any studies that addressed this question.

Quality of evidence across all critical outcomes: Very low

**PICO 81: Tramadol vs. Oral NSAIDs for hip or knee OA**

Summary: Three RCTs have compared tramadol to oral NSAIDs for the treatment of hip and knee OA. Beaulieu<sup>[1]</sup> et al. compared tramadol (titrated up to 400mg/day) to diclofenac, while DeLemos<sup>[2]</sup> et al. compared tramadol (100-300mg, 300 used for meta-analysis) to celecoxib in adults with hip or knee OA. Combined, these studies no significant between-group difference in pain and self-reported function (Table 1). However, there was a serious risk of bias due to high attrition (25-44%), and the findings were inconclusive due to serious imprecision in the effect estimates. In a randomized crossover trial, Pavelka<sup>[3]</sup> also compared tramadol to diclofenac, and observed no difference in improvement of pain or self-reported function. The results were reported in medians (Table 2), and could not be combined in the meta-analysis.

Quality of evidence: Low

| <b>Table 1. Tramadol compared to Oral NSAIDs for Hip or Knee OA for Knee/Hip OA</b> |                      |                      |                     |                      |                         |                                      |                                            |                      |                                 |                                                 |                                                      |
|-------------------------------------------------------------------------------------|----------------------|----------------------|---------------------|----------------------|-------------------------|--------------------------------------|--------------------------------------------|----------------------|---------------------------------|-------------------------------------------------|------------------------------------------------------|
| <b>Certainty assessment</b>                                                         |                      |                      |                     |                      |                         |                                      | <b>Summary of findings</b>                 |                      |                                 |                                                 |                                                      |
| <b>Nº of participants (studies) Follow-up</b>                                       | <b>Risk of bias</b>  | <b>Inconsistency</b> | <b>Indirectness</b> | <b>Imprecision</b>   | <b>Publication bias</b> | <b>Overall certainty of evidence</b> | <b>Number of patients</b>                  |                      | <b>Relative effect (95% CI)</b> | <b>Anticipated absolute effects</b>             |                                                      |
|                                                                                     |                      |                      |                     |                      |                         |                                      | <b>With Oral NSAIDs for Hip or Knee OA</b> | <b>With Tramadol</b> |                                 | <b>Risk with Oral NSAIDs for Hip or Knee OA</b> | <b>Risk difference with Tramadol</b>                 |
| <b>WOMAC Pain (lower scores indicate improvement)</b>                               |                      |                      |                     |                      |                         |                                      |                                            |                      |                                 |                                                 |                                                      |
| 498 (2 RCTs)                                                                        | serious <sup>a</sup> | not serious          | not serious         | serious <sup>b</sup> | none                    | ⊕⊕○○<br>LOW                          | 254                                        | 244                  | -                               | -                                               | <b>SMD 0.1 higher</b><br>(0.08 lower to 0.27 higher) |



| Table 1. Tramadol compared to Oral NSAIDs for Hip or Knee OA for Knee/Hip OA |                      |             |             |                      |      |                     |     |     |   |   |                                                       |
|------------------------------------------------------------------------------|----------------------|-------------|-------------|----------------------|------|---------------------|-----|-----|---|---|-------------------------------------------------------|
| Certainty assessment                                                         |                      |             |             |                      |      | Summary of findings |     |     |   |   |                                                       |
| WOMAC Function (lower scores indicate improvement)                           |                      |             |             |                      |      |                     |     |     |   |   |                                                       |
| 498<br>(2 RCTs)                                                              | serious <sup>a</sup> | not serious | not serious | serious <sup>b</sup> | none | ⊕⊕○○<br>LOW         | 254 | 244 | - | - | SMD <b>0.14 higher</b><br>(0.04 lower to 0.31 higher) |

CI: Confidence interval; SMD: Standardised mean difference

## Explanations

- Incomplete outcome data due to high attrition
- Wide 95% CI that crosses line of no effect

Table 2. RCT data not suitable for effect size calculation or combining with other data

| Ref ID, Author, year               | Study type                                            | Duration                                                        | Population Description                                                | Treatment given to relevant population                                                                                                                                                                                     | Results                                                                                                                                                                                                                                                                                                                                         |
|------------------------------------|-------------------------------------------------------|-----------------------------------------------------------------|-----------------------------------------------------------------------|----------------------------------------------------------------------------------------------------------------------------------------------------------------------------------------------------------------------------|-------------------------------------------------------------------------------------------------------------------------------------------------------------------------------------------------------------------------------------------------------------------------------------------------------------------------------------------------|
| 4819 Pavelka <sup>[3]</sup> , 1998 | Double blind crossover study,<br><br>Moderate quality | 4 weeks then cross over<br><br>One week wash out between phases | Knee or Hip OA (KL grade>=2)<br>n=60<br>randomized (8M:52F) age 44-85 | Group 1. Tramadol (4 weeks) then diclofenac (4 weeks)<br>Group 2. Diclofenac (4 weeks) then tramadol (4 weeks)<br><br>Tramadol dose:1-2 50mg capsule, 3 times per day<br>Diclofenac dose:1-2 25mg capsule, 3 times per day | Data estimated from period 1 boxplots<br>5 <sup>th</sup> , 25 <sup>th</sup> , 50 <sup>th</sup> (median), 75 <sup>th</sup> , 95 <sup>th</sup> percentile<br>WOMAC Pain:<br>Tramadol: -12.5, 2, 8.5, 16, 39.5<br>Diclofenac: -1.5, 5, 8, 17.5, 29.5<br><br>WOMAC Function:<br>Tramadol: -8.5, 0, 7, 11.5, 22.5<br>Diclofenac: 0, 2.5, 7, 13.5, 21 |

## References

1. Beaulieu AD, Peloso PM, Haraoui B, Bensen W, Thomson G, Wade J, et al. Once-daily, controlled-release tramadol and sustained-release diclofenac relieve chronic pain due to osteoarthritis: a randomized controlled trial. *Pain Res Manag.* 2008;13(2):103-110.
2. DeLemos BP, Xiang J, Benson C, Gana TJ, Pascual ML, Rosanna R, et al. Tramadol hydrochloride extended-release once-daily in the treatment of osteoarthritis of the knee and/or hip: a double-blind, randomized, dose-ranging trial. *Am J Ther.* 2011;18(3):216-226.
3. Pavelka K, Peliskova Z, Stehlikova H, Ratcliffe S, Repas C. Intraindividual differences in pain relief and functional improvement in osteoarthritis with diclofenac or tramadol. *Clin Drug Investig.* 1998;16(6):421-429.

#### **PICO 82. Non-tramadol opioids compared to oral NSAIDs in patients with knee or hip OA**

Summary. The literature searches did not identify any studies that addressed this question.

Quality of evidence across all critical outcomes: Very low

#### **PICO 83. Gabapentin compared to oral NSAIDs in patients with knee or hip OA**

Summary. The literature searches did not identify any studies that addressed this question.

Quality of evidence across all critical outcomes: Very low

#### **PICO 84. Pregabalin compared to oral NSAIDs for knee and hip OA**

Summary. The literature searches identified one RCT that compared pregabalin (25 mg/day) to meloxicam (10 mg/day) for 4 weeks in 59 patients with knee OA grade 1 through 4.<sup>[1]</sup> The study found no significant between-group difference in WOMAC pain or function at 4 weeks, although serious imprecision in the effect estimates mean the findings are inconclusive.

Quality of evidence across all critical outcomes: Low

| <b>Pregabalin compared to oral NSAIDS for knee and hip OA</b>                        |                      |                      |                     |                      |                         |                                      |                            |                        |                                 |                                     |                                                     |
|--------------------------------------------------------------------------------------|----------------------|----------------------|---------------------|----------------------|-------------------------|--------------------------------------|----------------------------|------------------------|---------------------------------|-------------------------------------|-----------------------------------------------------|
| <b>Certainty assessment</b>                                                          |                      |                      |                     |                      |                         |                                      | <b>Summary of findings</b> |                        |                                 |                                     |                                                     |
| <b>Nº of participants (studies) Follow-up</b>                                        | <b>Risk of bias</b>  | <b>Inconsistency</b> | <b>Indirectness</b> | <b>Imprecision</b>   | <b>Publication bias</b> | <b>Overall certainty of evidence</b> | <b>Number of patients</b>  |                        | <b>Relative effect (95% CI)</b> | <b>Anticipated absolute effects</b> |                                                     |
|                                                                                      |                      |                      |                     |                      |                         |                                      | <b>With oral NSAIDS</b>    | <b>With pregabalin</b> |                                 | <b>Risk with oral NSAIDS</b>        | <b>Risk difference with pregabalin</b>              |
| <b>WOMAC pain at 4 wks, post scores (0-20, lower scores indicate improvement)</b>    |                      |                      |                     |                      |                         |                                      |                            |                        |                                 |                                     |                                                     |
| 59 (1 RCT)                                                                           | serious <sup>a</sup> | not serious          | not serious         | serious <sup>b</sup> | none                    | ⊕⊕○○<br>LOW                          | 31                         | 28                     | -                               | -                                   | MD <b>0.3 higher</b><br>(1.07 lower to 1.67 higher) |
| <b>WOMAC function, 4 wks, change score (0-68, lower scores indicate improvement)</b> |                      |                      |                     |                      |                         |                                      |                            |                        |                                 |                                     |                                                     |
| 59 (1 RCT)                                                                           | serious <sup>a</sup> | not serious          | not serious         | serious <sup>b</sup> | none                    | ⊕⊕○○<br>LOW                          | 31                         | 28                     | -                               | -                                   | MD <b>1 higher</b><br>(4.79 lower to 6.79 higher)   |

**CI:** Confidence interval; **MD:** Mean difference

## Explanations

a. allocation concealment and blinding not reported

b. Wide 95% CI that overlaps line of no effect

## References

- Ohtori S, Inoue G, Orita S, Takaso M, Eguchi Y, Ochiai N, et al. Efficacy of combination of meloxicam and pregabalin for pain in knee osteoarthritis. *Yonsei Med J.* 2013;54(5):1253-1258.

**PICO 85. Methotrexate compared to oral NSAIDs in patients with knee or hip OA**

Summary. The literature searches did not identify any studies that addressed this question.

Quality of evidence across all critical outcomes: Very low

**PICO 86. Colchicine compared to oral NSAIDs in patients with knee or hip OA**

Summary. The literature searches did not identify any studies that addressed this question.

Quality of evidence across all critical outcomes: Very low

**PICO 87: Glucosamine compared to oral NSAIDs in patients with knee or hip OA**

Summary: This PICO question is addressed by 5 direct RCTs. The results for all pain and function outcomes showed no significant between-group differences, but all findings were inconclusive due to serious imprecision in effect estimates.

Quality of Evidence across all critical outcomes: Low.

| <b>Table 1. Glucosamine compared to NSAID for knee or hip OA</b> |                     |                      |                     |                    |                         |                                      |                            |                         |                                 |                                     |                                         |
|------------------------------------------------------------------|---------------------|----------------------|---------------------|--------------------|-------------------------|--------------------------------------|----------------------------|-------------------------|---------------------------------|-------------------------------------|-----------------------------------------|
| <b>Certainty assessment</b>                                      |                     |                      |                     |                    |                         |                                      | <b>Summary of findings</b> |                         |                                 |                                     |                                         |
| <b>Nº of participants (studies) Follow-up</b>                    | <b>Risk of bias</b> | <b>Inconsistency</b> | <b>Indirectness</b> | <b>Imprecision</b> | <b>Publication bias</b> | <b>Overall certainty of evidence</b> | <b>Number of patients</b>  |                         | <b>Relative effect (95% CI)</b> | <b>Anticipated absolute effects</b> |                                         |
|                                                                  |                     |                      |                     |                    |                         |                                      | <b>With NSAID</b>          | <b>With Glucosamine</b> |                                 | <b>Risk with NSAID</b>              | <b>Risk difference with Glucosamine</b> |
|                                                                  |                     |                      |                     |                    |                         |                                      |                            |                         |                                 |                                     |                                         |

**Table 1. Glucosamine compared to NSAID for knee or hip OA**

| Certainty assessment                                                 |             |                      |             |                      |      |                  | Summary of findings |     |   |   |                                                      |
|----------------------------------------------------------------------|-------------|----------------------|-------------|----------------------|------|------------------|---------------------|-----|---|---|------------------------------------------------------|
| <b>WOMAC pain, 6 months (lower scores indicate improvement)</b>      |             |                      |             |                      |      |                  |                     |     |   |   |                                                      |
| 855<br>(2 RCTs)                                                      | not serious | serious <sup>a</sup> | not serious | serious <sup>b</sup> | none | ⊕⊕○○<br>LOW      | 428                 | 427 | - | - | <b>SMD 0.04 lower</b><br>(0.44 lower to 0.37 higher) |
| <b>HAQ pain, 6 months (lower scores indicate improvement)</b>        |             |                      |             |                      |      |                  |                     |     |   |   |                                                      |
| 635<br>(1 RCT)                                                       | not serious | not serious          | not serious | serious <sup>b</sup> | none | ⊕⊕⊕○<br>MODERATE | 318                 | 317 | - | - | <b>MD 4.2 higher</b><br>(0.2 lower to 8.6 higher)    |
| <b>VAS pain, 12 weeks (0-10, lower scores indicate improvement)</b>  |             |                      |             |                      |      |                  |                     |     |   |   |                                                      |
| 24<br>(1 RCT)                                                        | not serious | not serious          | not serious | serious <sup>c</sup> | none | ⊕⊕⊕○<br>MODERATE | 12                  | 12  | - | - | <b>MD 0.04 higher</b><br>(0.24 lower to 0.32 higher) |
| <b>Lequesne's index, 4 weeks (lower scores indicate improvement)</b> |             |                      |             |                      |      |                  |                     |     |   |   |                                                      |
| 199<br>(1 RCT)                                                       | not serious | not serious          | not serious | serious <sup>b</sup> | none | ⊕⊕⊕○<br>MODERATE | 99                  | 100 | - | - | <b>MD 0</b><br>(1.67 lower to 1.67 higher)           |
| <b>WOMAC function, 6 months (lower scores indicate improvement)</b>  |             |                      |             |                      |      |                  |                     |     |   |   |                                                      |

**Table 1. Glucosamine compared to NSAID for knee or hip OA**

| Certainty assessment |             |                      |             |                      |      |             | Summary of findings |     |   |   |                                                       |
|----------------------|-------------|----------------------|-------------|----------------------|------|-------------|---------------------|-----|---|---|-------------------------------------------------------|
| 855<br>(2 RCTs)      | not serious | serious <sup>a</sup> | not serious | serious <sup>b</sup> | none | ⊕⊕○○<br>LOW | 428                 | 427 | - | - | <b>SMD 0.06 higher</b><br>(0.23 lower to 0.34 higher) |

**CI:** Confidence interval; **MD:** Mean difference; **SMD:** Standardized mean difference

### Explanations

- a. High I-squared and Chi-squared values
- b. Wide CI crossing significant effect and no-effect lines
- c. Very small study with CI crossing line of no effect

**Table 2. RCT data not suitable for effect size calculation or combining with other data**

| Author, year            | Study type       | Duration  | Population Description    | Treatment given to relevant population                                                  | Results                                                                                                                                                                                                                                                       |
|-------------------------|------------------|-----------|---------------------------|-----------------------------------------------------------------------------------------|---------------------------------------------------------------------------------------------------------------------------------------------------------------------------------------------------------------------------------------------------------------|
| 899<br>Sawitzke<br>2010 | Double-blind RCT | 24 months | 662 patients with knee OA | glucosamine 500 mg three times daily, celecoxib 200 mg daily, or placebo over 24 months | Glucosamine WOMAC pain mean change at 24 months: -31.1<br>Celecoxib WOMAC pain mean change at 24 months: -32.8; MD -1.7<br>Glucosamine WOMAC function mean change at 24 months: -22.58<br>Celecoxib WOMAC function mean change at 24 months: -24.07; MD -3.49 |

### References:

1. Qiu G., et al (1998). Efficacy and safety of glucosamine sulfate versus ibuprofen in patients with knee osteoarthritis. *Arzneimittelforschung*. 1998 May;48(5):469-74.
2. Chopra, A. A. S. (2013). Ayurvedic medicine offers a good alternative to glucosamine and celecoxib in the treatment of symptomatic knee osteoarthritis: a randomized, double-blind, controlled equivalence drug trial. *Rheumatology (Oxford)*, 52(8), 1408-1417. doi:10.1093/rheumatology/kes414 10.1093/rheumatology/kes414. Epub 2013 Jan 30.
3. Muller-Fassbender, H. A. B. (1994). Glucosamine sulfate compared to ibuprofen in osteoarthritis of the knee. *Osteoarthritis Cartilage*, 2(1), 61-69.
4. Sawitzke, A. et al. (2010). Clinical efficacy and safety of glucosamine, chondroitin sulphate, their combination, celecoxib or placebo taken to treat osteoarthritis of the knee: 2-year results from GAIT. *Ann Rheum Dis* 2010;69:1459–1464. doi:10.1136/ard.2009.120469
5. Clegg D., (2006). Glucosamine, Chondroitin Sulfate, and the Two in Combination for Painful Knee Osteoarthritis. *N Engl J Med* 2006;354:795-808

**PICO 88: Chondroitin compared to oral NSAIDs in patients with hip or knee OA**

Summary: This PICO question is addressed by 5 direct RCTs. The results for WOMAC pain, HAQ pain, Lequesne’s index, VAS Huskisson’s and WOMAC function were in favor of NSAIDs over Chondroitin, with low imprecision for HAQ pain, Lequesne’s index, and WOMAC function, and serious imprecision for WOMAC pain and VAS Huskisson’s. Serious adverse event rates did not differ significantly between groups, but the results are imprecise due to the low number of events.

Quality of Evidence across all critical outcomes: Moderate

| <b>Table 1. Chondroitin compared to NSAIDs for knee or hip OA</b> |                     |                      |                     |                    |                         |                                      |                            |                         |                                 |                                     |                                         |
|-------------------------------------------------------------------|---------------------|----------------------|---------------------|--------------------|-------------------------|--------------------------------------|----------------------------|-------------------------|---------------------------------|-------------------------------------|-----------------------------------------|
| <b>Certainty assessment</b>                                       |                     |                      |                     |                    |                         |                                      | <b>Summary of findings</b> |                         |                                 |                                     |                                         |
| <b>Nº of participants (studies) Follow-up</b>                     | <b>Risk of bias</b> | <b>Inconsistency</b> | <b>Indirectness</b> | <b>Imprecision</b> | <b>Publication bias</b> | <b>Overall certainty of evidence</b> | <b>Number of patients</b>  |                         | <b>Relative effect (95% CI)</b> | <b>Anticipated absolute effects</b> |                                         |
|                                                                   |                     |                      |                     |                    |                         |                                      | <b>With NSAIDs</b>         | <b>With Chondroitin</b> |                                 | <b>Risk with NSAIDs</b>             | <b>Risk difference with Chondroitin</b> |
|                                                                   |                     |                      |                     |                    |                         |                                      |                            |                         |                                 |                                     |                                         |

**Table 1. Chondroitin compared to NSAIDs for knee or hip OA**

| Certainty assessment                                                     |             |             |             |                      |      | Summary of findings |     |     |   |   |                                                                                  |
|--------------------------------------------------------------------------|-------------|-------------|-------------|----------------------|------|---------------------|-----|-----|---|---|----------------------------------------------------------------------------------|
| <b>WOMAC pain, 24 weeks (0-500, lower scores indicate improvement)</b>   |             |             |             |                      |      |                     |     |     |   |   |                                                                                  |
| 636<br>(1 RCT)                                                           | not serious | not serious | not serious | serious <sup>a</sup> | none | ⊕⊕⊕○<br>MODERATE    | 318 | 318 | - | - | MD <b>16.1 higher</b><br>(0.16 lower to 32.36 higher)                            |
| <b>HAQ pain, 24 weeks (lower scores indicate improvement)</b>            |             |             |             |                      |      |                     |     |     |   |   |                                                                                  |
| 636<br>(1 RCT)                                                           | not serious | not serious | not serious | not serious          | none | ⊕⊕⊕⊕<br>HIGH        | 318 | 318 | - | - | MD <b>4.8 higher</b><br>(0.69 higher to 8.91 higher)                             |
| <b>Lequesne's index, 4 weeks (lower scores indicate improvement)</b>     |             |             |             |                      |      |                     |     |     |   |   |                                                                                  |
| 146<br>(1 RCT)                                                           | not serious | not serious | not serious | not serious          | none | ⊕⊕⊕⊕<br>HIGH        | 72  | 74  | - | - | MD <b>2.1 higher</b><br>(1.05 higher to 3.15 higher)<br><br><b>Favors NSAIDs</b> |
| <b>VAS Huskisson, 4 weeks (0-100, lower scores indicate improvement)</b> |             |             |             |                      |      |                     |     |     |   |   |                                                                                  |



**Table 1. Chondroitin compared to NSAIDs for knee or hip OA**

| Certainty assessment                                                        |             |             |             |                      |      |                  | Summary of findings |                  |                           |              |                                                                                     |
|-----------------------------------------------------------------------------|-------------|-------------|-------------|----------------------|------|------------------|---------------------|------------------|---------------------------|--------------|-------------------------------------------------------------------------------------|
| 146<br>(1 RCT)                                                              | not serious | not serious | not serious | serious <sup>b</sup> | none | ⊕⊕⊕○<br>MODERATE | 72                  | 74               | -                         | -            | MD <b>1.2 higher</b><br>(4.1 lower to 6.5 higher)                                   |
| <b>WOMAC function, 24 weeks (0-1700, lower scores indicate improvement)</b> |             |             |             |                      |      |                  |                     |                  |                           |              |                                                                                     |
| 636<br>(1 RCT)                                                              | not serious | not serious | not serious | serious <sup>a</sup> | none | ⊕⊕⊕○<br>MODERATE | 318                 | 318              | -                         | -            | MD <b>53.7 higher</b><br>(0.28 higher to 107.12 higher)<br><br><b>Favors NSAIDs</b> |
| <b>SAE, 24 months</b>                                                       |             |             |             |                      |      |                  |                     |                  |                           |              |                                                                                     |
| 194<br>(1 RCT)                                                              | not serious | not serious | not serious | serious <sup>b</sup> | none | ⊕⊕⊕○<br>MODERATE | 6/97<br>(6.2%)      | 10/97<br>(10.3%) | OR 1.74<br>(0.61 to 5.00) | 62 per 1,000 | <b>41 more per 1,000</b><br>(23 fewer to 186 more)                                  |

**CI:** Confidence interval; **MD:** Mean difference; **OR:** Odds ratio

## Explanations

a. Very wide CI close to no-effect line

b. Wide CI crossing no-effect line

**Table 2. RCT data not suitable for effect size calculation or combining with other data**

| Author, year              | Study type          | Duration  | Population Description                                                   | Treatment given to relevant population                                                              | Results                                                                                                                                                                                                                                                                      |
|---------------------------|---------------------|-----------|--------------------------------------------------------------------------|-----------------------------------------------------------------------------------------------------|------------------------------------------------------------------------------------------------------------------------------------------------------------------------------------------------------------------------------------------------------------------------------|
| 899<br>Sawitzke<br>2010   | Double-blind<br>RCT | 24 months | 662 patients with<br>knee OA                                             | CS 400 mg three times<br>daily, celecoxib 200 mg<br>daily, or placebo over 24<br>months             | Chondroitin WOMAC pain mean change at 24<br>months: -27.91<br>Celecoxib WOMAC pain mean change at 24<br>months: -32.8 ; MD -4.89<br>Chondroitin WOMAC function mean change at 24<br>months: -20.98<br>Celecoxib WOMAC function mean change at 24<br>months: -24.07; MD -4.09 |
| 811<br>Pelletier<br>2016  | Double-blind<br>RCT | 30 days   | 662 patients with<br>knee OA                                             | CS 1200 mg/day versus<br>150 mg Diclofenac Sodium<br>tablets/day for 30 days                        | Lequesne Index CS entry 7.8±3.5, 30 days<br>4.9±2.5, change -37.52%; DS entry 7.9±3.7, 30<br>days 2.9±2.3, change -63.43%.<br>Huskisson (VAS) CS entry 56.4±16.6, 30 days<br>30.9±14.0, change -45.2%; DS entry 56.7±18.7, 30<br>days 30.0±15.0, change -47.1%.              |
| 6111<br>Reginster<br>2017 | Double-blind<br>RCT | 6 months  | 604 patients<br>aged 50 years or<br>older with<br>symptomatic<br>knee OA | Chondroitin sulfate<br>800mg/day, oral celecoxib,<br>200mg once daily (n=200)<br>or placebo (n=205) | VAS CS at baseline 71.2, at 6 months 28.6, change<br>-42.6; Celecoxib at baseline 70.0 (0.8), at 6<br>months 30.5, change -39.5<br>Lequesne's Index CS at baseline 11.8, at 30 days<br>7.1, change -4.7; Celecoxib at baseline 11.6, at<br>30 days 7.0, change -4.6          |

## References:

1. Morreale, P., Manopulo, R., Galati, M., Boccanera, L., Saponati, G., & Bocchi, L. (1996). Comparison of the antiinflammatory efficacy of chondroitin sulfate and diclofenac sodium in patients with knee osteoarthritis. *J Rheumatol*, 23(8), 1385-1391.
2. Pelletier, J. P. A. R. (2016). Chondroitin sulfate efficacy versus celecoxib on knee osteoarthritis structural changes using magnetic resonance imaging: a 2-year multicentre exploratory study. *Arthritis Res Ther*, 18(1), 256. doi:10.1186/s13075-016-1149-0
3. Reginster, J. Y. A. D. (2017). Pharmaceutical-grade chondroitin sulfate is as effective as celecoxib and superior to placebo in symptomatic knee osteoarthritis: The chondroitin vs celecoxib vs placebo trial (CONCEPT). *Osteoporosis International*, 28(1 Supplement 1), S56. doi:10.1007/s00198-017-3945-z

4. Sawitzke, A. et al. (2010). Clinical efficacy and safety of glucosamine, chondroitin sulphate, their combination, celecoxib or placebo taken to treat osteoarthritis of the knee: 2-year results from GAIT. *Ann Rheum Dis* 2010;69:1459–1464. doi:10.1136/ard.2009.120469
5. Clegg D., (2006). Glucosamine, Chondroitin Sulfate, and the Two in Combination for Painful Knee Osteoarthritis. *N Engl J Med* 2006;354:795-808

**PICO 89: Glucosamine + chondroitin compared to oral NSAIDs in patients with hip or knee OA**

Summary: This PICO question is addressed by 4 direct RCTs [1-4]. The results across all outcomes showed no significant difference between treatments, but some of the findings were imprecise due to wide 95% CIs that included the possibility of a difference between treatments.

Quality of Evidence across outcomes: Moderate

| <b>Table 1. Glucosamine + chondroitin compared to oral NSAIDs for knee or hip OA</b> |                     |                      |                     |                    |                         |                                      |                            |                                       |                                 |                                     |                                                        |
|--------------------------------------------------------------------------------------|---------------------|----------------------|---------------------|--------------------|-------------------------|--------------------------------------|----------------------------|---------------------------------------|---------------------------------|-------------------------------------|--------------------------------------------------------|
| <b>Certainty assessment</b>                                                          |                     |                      |                     |                    |                         |                                      | <b>Summary of findings</b> |                                       |                                 |                                     |                                                        |
| <b>Nº of participants (studies) Follow-up</b>                                        | <b>Risk of bias</b> | <b>Inconsistency</b> | <b>Indirectness</b> | <b>Imprecision</b> | <b>Publication bias</b> | <b>Overall certainty of evidence</b> | <b>Number of patients</b>  |                                       | <b>Relative effect (95% CI)</b> | <b>Anticipated absolute effects</b> |                                                        |
|                                                                                      |                     |                      |                     |                    |                         |                                      | <b>With oral NSAIDs</b>    | <b>With glucosamine + chondroitin</b> |                                 | <b>Risk with oral NSAIDs</b>        | <b>Risk difference with glucosamine + chondroitin</b>  |
| <b>WOMAC pain, 6 months (0-500, lower scores indicate improvement)</b>               |                     |                      |                     |                    |                         |                                      |                            |                                       |                                 |                                     |                                                        |
| 1203 (2 RCTs)                                                                        | not serious         | not serious          | not serious         | not serious        | none                    | ⊕⊕⊕⊕<br>HIGH                         | 600                        | 603                                   | -                               | -                                   | MD <b>0.13 higher</b><br>(12.92 lower to 13.19 higher) |
| <b>HAQ pain score, 6 months (lower scores indicate improvement)</b>                  |                     |                      |                     |                    |                         |                                      |                            |                                       |                                 |                                     |                                                        |

**Table 1. Glucosamine + chondroitin compared to oral NSAIDs for knee or hip OA**

| Certainty assessment                                                        |             |             |             |                      |      |                  | Summary of findings |              |                           |              |                                                        |
|-----------------------------------------------------------------------------|-------------|-------------|-------------|----------------------|------|------------------|---------------------|--------------|---------------------------|--------------|--------------------------------------------------------|
| 635<br>(1 RCT)                                                              | not serious | not serious | not serious | serious <sup>a</sup> | none | ⊕⊕⊕○<br>MODERATE | 318                 | 317          | -                         | -            | MD <b>0.6 lower</b><br>(4.97 lower to 3.77 higher)     |
| <b>Huskisson's VAS (0-100, lower scores indicate improvement)</b>           |             |             |             |                      |      |                  |                     |              |                           |              |                                                        |
| 568<br>(1 RCT)                                                              | not serious | not serious | not serious | serious <sup>a</sup> | none | ⊕⊕⊕○<br>MODERATE | 282                 | 286          | -                         | -            | MD <b>0.2 higher</b><br>(4.38 lower to 4.78 higher)    |
| <b>WOMAC function, 6 months (0-1700, lower scores indicate improvement)</b> |             |             |             |                      |      |                  |                     |              |                           |              |                                                        |
| 1203<br>(2 RCTs)                                                            | not serious | not serious | not serious | not serious          | none | ⊕⊕⊕⊕<br>HIGH     | 600                 | 603          | -                         | -            | MD <b>16.2 higher</b><br>(25.74 lower to 58.14 higher) |
| <b>SAE</b>                                                                  |             |             |             |                      |      |                  |                     |              |                           |              |                                                        |
| 568<br>(1 RCT)                                                              | not serious | not serious | not serious | serious <sup>a</sup> | none | ⊕⊕⊕○<br>MODERATE | 10/282<br>(3.5%)    | 7/286 (2.4%) | OR 0.68<br>(0.26 to 1.82) | 35 per 1,000 | <b>11 fewer per 1,000</b><br>(26 fewer to 27 more)     |

**CI:** Confidence interval; **MD:** Mean difference; **OR:** Odds ratio

## Explanations

- Wide CI crossing line of no-effect. Note: WOMAC pain and function are not downgraded for imprecision because the scales used are large (0-500 for pain, 0-1700 for function).

**Table 2. RCT data not suitable for effect size calculation or combining with other data**

| <b>Author, year</b>     | <b>Study type</b>   | <b>Duration</b> | <b>Population Description</b> | <b>Treatment given to relevant population</b>                                                                                                                              | <b>Results</b>                                                                                                                                                                                                                                                                                   |
|-------------------------|---------------------|-----------------|-------------------------------|----------------------------------------------------------------------------------------------------------------------------------------------------------------------------|--------------------------------------------------------------------------------------------------------------------------------------------------------------------------------------------------------------------------------------------------------------------------------------------------|
| 899<br>Sawitzke<br>2010 | Double-blind<br>RCT | 24 months       | 662 patients with<br>knee OA  | glucosamine 500 mg three<br>times daily, CS 400 mg three<br>times daily, the combination<br>of glucosamine and CS,<br>celecoxib 200 mg daily, or<br>placebo over 24 months | Glucosamine+Chondroitin WOMAC pain mean change at 24<br>months: -30<br>Celecoxib WOMAC pain mean change at 24 months: -32.8;<br>MD -2.8<br>Glucosamine+Chondroitin WOMAC function mean change at<br>24 months: -19.94<br>Celecoxib WOMAC function mean change at 24 months: -<br>24.07; MD -4.13 |

## References:

1. Sawitzke, A. et al. (2010). Clinical efficacy and safety of glucosamine, chondroitin sulphate, their combination, celecoxib or placebo taken to treat osteoarthritis of the knee: 2-year results from GAIT. *Ann Rheum Dis* 2010;69:1459–1464. doi:10.1136/ard.2009.120469
2. Clegg D., (2006). Glucosamine, Chondroitin Sulfate, and the Two in Combination for Painful Knee Osteoarthritis. *N Engl J Med* 2006;354:795-808
3. Morreale, P., Manopulo, R., Galati, M., Boccanera, L., Saponati, G., & Bocchi, L. (1996). Comparison of the antiinflammatory efficacy of chondroitin sulfate and diclofenac sodium in patients with knee osteoarthritis. *J Rheumatol*, 23(8), 1385-1391.
4. Pelletier, J. P. A. R. (2016). Chondroitin sulfate efficacy versus celecoxib on knee osteoarthritis structural changes using magnetic resonance imaging: a 2-year multicentre exploratory study. *Arthritis Res Ther*, 18(1), 256. doi:10.1186/s13075-016-1149-0

### **PICO 90. Vitamin D compared to oral NSAIDs in patients with knee or hip OA**

Summary. The literature searches did not identify any studies that addressed this question.

Quality of evidence across all critical outcomes: Very low

### **PICO 91. Fish oil compared to oral NSAIDs in patients with knee or hip OA**

Summary. The literature searches did not identify any studies that addressed this question.

Quality of evidence across all critical outcomes: Very low

**PICO 92: Anti-nerve growth factor vs. Oral NSAID for OA of hip/knee**

Summary. This PICO was addressed by 2 RCTs. <sup>[1,2]</sup> One study directly compared tanezumab to oral NSAIDs (Table 1), while the other had some indirectness (tanezumab plus oral NSAID vs. oral NSAID alone, Table 2). Both studies showed a significant improvement in WOMAC pain and function in the tanezumab group compared to the NSAID group. Although there was no significant difference in serious adverse events, there was some imprecision in the effect estimates for both trials.

Quality of evidence across all critical outcomes: Moderate

| <b>Table 1. Anti-nerve growth factor compared to Oral NSAID for OA of Hip/Knee</b>     |                     |                      |                     |                    |                         |                                      |                            |                                      |                                 |                                     |                                                                              |
|----------------------------------------------------------------------------------------|---------------------|----------------------|---------------------|--------------------|-------------------------|--------------------------------------|----------------------------|--------------------------------------|---------------------------------|-------------------------------------|------------------------------------------------------------------------------|
| <b>Certainty assessment</b>                                                            |                     |                      |                     |                    |                         |                                      | <b>Summary of findings</b> |                                      |                                 |                                     |                                                                              |
| <b>No of participants (studies) Follow-up</b>                                          | <b>Risk of bias</b> | <b>Inconsistency</b> | <b>Indirectness</b> | <b>Imprecision</b> | <b>Publication bias</b> | <b>Overall certainty of evidence</b> | <b>Number of Patients</b>  |                                      | <b>Relative effect (95% CI)</b> | <b>Anticipated absolute effects</b> |                                                                              |
|                                                                                        |                     |                      |                     |                    |                         |                                      | <b>With Oral NSAID</b>     | <b>With Anti-nerve growth factor</b> |                                 | <b>Risk with Oral NSAID</b>         | <b>Risk difference with Anti-nerve growth factor</b>                         |
| <b>WOMAC Pain (change from baseline) (0-11, lower scores indicate improvement)</b>     |                     |                      |                     |                    |                         |                                      |                            |                                      |                                 |                                     |                                                                              |
| 1080 (1 RCT)                                                                           | not serious         | not serious          | not serious         | not serious        | none                    | ⊕⊕⊕⊕<br>HIGH                         | 539                        | 541                                  | -                               | -                                   | MD <b>0.54 lower</b><br>(0.81 lower to 0.28 lower)<br><br><b>Favors ANGF</b> |
| <b>WOMAC Function (change from baseline) (0-11, lower scores indicate improvement)</b> |                     |                      |                     |                    |                         |                                      |                            |                                      |                                 |                                     |                                                                              |

**Table 1. Anti-nerve growth factor compared to Oral NSAID for OA of Hip/Knee**

| Certainty assessment |             |             |             |                      |      |                  | Summary of findings |                  |                                  |              |                                                                              |
|----------------------|-------------|-------------|-------------|----------------------|------|------------------|---------------------|------------------|----------------------------------|--------------|------------------------------------------------------------------------------|
| 1080<br>(1 RCT)      | not serious | not serious | not serious | not serious          | none | ⊕⊕⊕⊕<br>HIGH     | 539                 | 541              | -                                | -            | MD <b>0.59 lower</b><br>(0.83 lower to 0.34 lower)<br><br><b>Favors ANGF</b> |
| <b>SAE</b>           |             |             |             |                      |      |                  |                     |                  |                                  |              |                                                                              |
| 1080<br>(1 RCT)      | not serious | not serious | not serious | serious <sup>b</sup> | none | ⊕⊕⊕○<br>MODERATE | 43/539<br>(8.0%)    | 44/541<br>(8.1%) | <b>OR 1.02</b><br>(0.66 to 1.58) | 80 per 1,000 | <b>1 more per 1,000</b><br>(26 fewer to 41 more)                             |

CI: Confidence interval; MD: Mean difference; OR: Odds ratio

### Explanations

a. Wide 95% CI crosses line of no effect

**Anti-nerve growth factor + Oral NSAID compared to Oral NSAID for OA of Hip / Knee**

| Certainty assessment                                                               |              |               |              |             |                  |                               | Summary of findings |                                            |                          |                              |                                                            |
|------------------------------------------------------------------------------------|--------------|---------------|--------------|-------------|------------------|-------------------------------|---------------------|--------------------------------------------|--------------------------|------------------------------|------------------------------------------------------------|
| No of participants (studies)<br>Follow-up                                          | Risk of bias | Inconsistency | Indirectness | Imprecision | Publication bias | Overall certainty of evidence | Number of Patients  |                                            | Relative effect (95% CI) | Anticipated absolute effects |                                                            |
|                                                                                    |              |               |              |             |                  |                               | With Oral NSAID     | With Anti-nerve growth factor + Oral NSAID |                          | Risk with Oral NSAID         | Risk difference with Anti-nerve growth factor + Oral NSAID |
| <b>WOMAC pain (change from baseline) (0-11, lower scores indicate improvement)</b> |              |               |              |             |                  |                               |                     |                                            |                          |                              |                                                            |

| Anti-nerve growth factor + Oral NSAID compared to Oral NSAID for OA of Hip / Knee      |             |             |                      |                      |      |                     |                 |                 |                                  |              |                                                                             |
|----------------------------------------------------------------------------------------|-------------|-------------|----------------------|----------------------|------|---------------------|-----------------|-----------------|----------------------------------|--------------|-----------------------------------------------------------------------------|
| Certainty assessment                                                                   |             |             |                      |                      |      | Summary of findings |                 |                 |                                  |              |                                                                             |
| 302<br>(1 RCT)                                                                         | not serious | not serious | serious <sup>a</sup> | not serious          | none | ⊕⊕⊕○<br>MODERATE    | 152             | 150             | -                                | -            | MD <b>0.51 lower</b><br>(1.04 lower to 0.02 higher)                         |
| <b>WOMAC function (change from baseline) (0-11, lower scores indicate improvement)</b> |             |             |                      |                      |      |                     |                 |                 |                                  |              |                                                                             |
| 302<br>(1 RCT)                                                                         | not serious | not serious | serious <sup>a</sup> | not serious          | none | ⊕⊕⊕○<br>MODERATE    | 152             | 150             | -                                | -            | MD <b>0.63 lower</b><br>(1.16 lower to 0.1 lower)<br><br><b>Favors ANGF</b> |
| <b>SAE</b>                                                                             |             |             |                      |                      |      |                     |                 |                 |                                  |              |                                                                             |
| 302<br>(1 RCT)                                                                         | not serious | not serious | serious <sup>a</sup> | serious <sup>b</sup> | none | ⊕⊕○○<br>LOW         | 8/152<br>(5.3%) | 8/150<br>(5.3%) | <b>OR 1.01</b><br>(0.37 to 2.78) | 53 per 1,000 | <b>0 fewer per 1,000</b><br>(32 fewer to 81 more)                           |

**CI:** Confidence interval; **MD:** Mean difference; **OR:** Odds ratio

## Explanations

- a. Anti-nerve growth factor + Oral NSAID vs. Oral NSAID
- b. Wide 95% CI crosses line of no effect

## References



1. Balanescu AR, Feist E, Wolfram G, Davignon I, Smith MD, Brown MT, et al. Efficacy and safety of tanezumab added on to diclofenac sustained release in patients with knee or hip osteoarthritis: a double-blind, placebo-controlled, parallel-group, multicentre phase III randomised clinical trial. *Ann Rheum Dis.* 2014;73(9):1665-1672.
2. Schnitzer TJ, Ekman EF, Spierings EL, Greenberg HS, Smith MD, Brown MT, et al. Efficacy and safety of tanezumab monotherapy or combined with non-steroidal anti-inflammatory drugs in the treatment of knee or hip osteoarthritis pain. *Ann Rheum Dis.* 2015;74(6):1202-1211.

**PICO 93. Tumor necrosis factor inhibitor compared to oral NSAIDs in patients with knee or hip OA**

Summary. The literature searches did not identify any studies that addressed this question.

Quality of evidence across all critical outcomes: Very low

**PICO 94. Interleukin-1 inhibitor compared to oral NSAIDs in patients with knee or hip OA**

Summary. The literature searches did not identify any studies that addressed this question.

Quality of evidence across all critical outcomes: Very low

**PICO 95. Tramadol compared to non-tramadol opioids in patients with knee or hip OA**

Summary. The literature searches did not identify any studies that addressed this question.

Quality of evidence across all critical outcomes: Very low

**PICO 96: Topical NSAIDs versus no treatment for patients with knee or hip OA**

Summary: This PICO question is addressed by 17 direct RCTs. The results for all pain and function outcomes significantly favor treatment with topical NSAIDs over no treatment. The only outcome that favors placebo is serious adverse events, but the effect estimate is imprecise due to the small number of events.

Quality of Evidence across outcomes: Moderate.

| <b>Table 1. Topical NSAIDs compared to Placebo for symptomatic knee OA</b> |                     |                      |                     |                      |                         |                                      |                            |                            |                                 |                                     |                                                                                         |
|----------------------------------------------------------------------------|---------------------|----------------------|---------------------|----------------------|-------------------------|--------------------------------------|----------------------------|----------------------------|---------------------------------|-------------------------------------|-----------------------------------------------------------------------------------------|
| <b>Certainty assessment</b>                                                |                     |                      |                     |                      |                         |                                      | <b>Summary of findings</b> |                            |                                 |                                     |                                                                                         |
| <b>Nº of participants (studies) Follow-up</b>                              | <b>Risk of bias</b> | <b>Inconsistency</b> | <b>Indirectness</b> | <b>Imprecision</b>   | <b>Publication bias</b> | <b>Overall certainty of evidence</b> | <b>Number of patients</b>  |                            | <b>Relative effect (95% CI)</b> | <b>Anticipated absolute effects</b> |                                                                                         |
|                                                                            |                     |                      |                     |                      |                         |                                      | <b>With Placebo</b>        | <b>With topical NSAIDs</b> |                                 | <b>Risk with Placebo</b>            | <b>Risk difference with topical NSAIDs</b>                                              |
| <b>WOMAC pain, 12 weeks (lower scores indicate improvement)</b>            |                     |                      |                     |                      |                         |                                      |                            |                            |                                 |                                     |                                                                                         |
| 4263 (14 RCTs)                                                             | not serious         | serious <sup>a</sup> | not serious         | not serious          | none                    | ⊕⊕⊕○<br>MODERATE                     | 2131                       | 2132                       | -                               | -                                   | SMD <b>0.25 lower</b><br>(0.35 lower to 0.15 lower)<br><br><b>Favors topical NSAIDs</b> |
| <b>Huskisson's VAS, 2 weeks (0-100, lower scores indicate improvement)</b> |                     |                      |                     |                      |                         |                                      |                            |                            |                                 |                                     |                                                                                         |
| 155 (1 RCT)                                                                | not serious         | not serious          | not serious         | serious <sup>b</sup> | none                    | ⊕⊕⊕○<br>MODERATE                     | 77                         | 78                         | -                               | -                                   | MD <b>11.3 lower</b><br>(17.26 lower to 5.34 lower)<br><br><b>Favors topical NSAIDs</b> |

**Table 1. Topical NSAIDs compared to Placebo for symptomatic knee OA**

| Certainty assessment                                                    |             |             |             |                      |      | Summary of findings |     |     |   |   |                                                                                         |
|-------------------------------------------------------------------------|-------------|-------------|-------------|----------------------|------|---------------------|-----|-----|---|---|-----------------------------------------------------------------------------------------|
| <b>VAS pain, 3 weeks (0-100, lower scores indicate improvement)</b>     |             |             |             |                      |      |                     |     |     |   |   |                                                                                         |
| 237<br>(1 RCT)                                                          | not serious | not serious | not serious | serious <sup>b</sup> | none | ⊕⊕⊕○<br>MODERATE    | 120 | 117 | - | - | MD <b>9 lower</b><br>(15.37 lower to 2.63 lower)<br><br><b>Favors topical NSAIDs</b>    |
| <b>VAS pain at rest, 2 weeks (lower scores indicate improvement)</b>    |             |             |             |                      |      |                     |     |     |   |   |                                                                                         |
| 164<br>(2 RCTs)                                                         | not serious | not serious | not serious | not serious          | none | ⊕⊕⊕⊕<br>HIGH        | 81  | 83  | - | - | SMD <b>0.76 lower</b><br>(1.15 lower to 0.36 lower)<br><br><b>Favors topical NSAIDs</b> |
| <b>VAS pain in motion, 12 weeks (lower scores indicate improvement)</b> |             |             |             |                      |      |                     |     |     |   |   |                                                                                         |

**Table 1. Topical NSAIDs compared to Placebo for symptomatic knee OA**

| Certainty assessment                                                 |             |                      |             |             |      |                  | Summary of findings |      |   |   |                                                                                         |
|----------------------------------------------------------------------|-------------|----------------------|-------------|-------------|------|------------------|---------------------|------|---|---|-----------------------------------------------------------------------------------------|
| 1504<br>(7 RCTs)                                                     | not serious | not serious          | not serious | not serious | none | ⊕⊕⊕⊕<br>HIGH     | 747                 | 757  | - | - | SMD <b>0.32 lower</b><br>(0.46 lower to 0.18 lower)<br><br><b>Favors topical NSAIDs</b> |
| <b>Lequesne's index, 2 weeks (lower scores indicate improvement)</b> |             |                      |             |             |      |                  |                     |      |   |   |                                                                                         |
| 305<br>(3 RCTs)                                                      | not serious | not serious          | not serious | not serious | none | ⊕⊕⊕⊕<br>HIGH     | 152                 | 153  | - | - | MD <b>1.81 lower</b><br>(2.37 lower to 1.25 lower)<br><br><b>Favors topical NSAIDs</b>  |
| <b>WOMAC function, 12 weeks (lower scores indicate improvement)</b>  |             |                      |             |             |      |                  |                     |      |   |   |                                                                                         |
| 3366<br>(12 RCTs)                                                    | not serious | serious <sup>a</sup> | not serious | not serious | none | ⊕⊕⊕○<br>MODERATE | 1677                | 1689 | - | - | SMD <b>0.27 lower</b><br>(0.39 lower to 0.16 lower)<br><br><b>Favors topical NSAIDs</b> |

| Table 1. Topical NSAIDs compared to Placebo for symptomatic knee OA |             |             |             |                      |      |                     |                 |                  |                           |             |                                                 |
|---------------------------------------------------------------------|-------------|-------------|-------------|----------------------|------|---------------------|-----------------|------------------|---------------------------|-------------|-------------------------------------------------|
| Certainty assessment                                                |             |             |             |                      |      | Summary of findings |                 |                  |                           |             |                                                 |
| <b>SAE, 12 weeks</b>                                                |             |             |             |                      |      |                     |                 |                  |                           |             |                                                 |
| 1929<br>(4 RCTs)                                                    | not serious | not serious | not serious | serious <sup>c</sup> | none | ⊕⊕⊕○<br>MODERATE    | 9/965<br>(0.9%) | 16/964<br>(1.7%) | OR 1.59<br>(0.48 to 5.26) | 9 per 1,000 | <b>5 more per 1,000</b><br>(5 fewer to 38 more) |

**CI:** Confidence interval; **MD:** Mean difference; **SMD:** Standardised mean difference; **OR:** Odds ratio

## Explanations

- a. I-squared and Chi-squared are high, no explanation
- b. Small sample size
- c. Wide CI crossing no-effect line

**Table 2. RCT data not suitable for effect size calculation or combining with other data**

| Author, year       | Study type | Duration | Population Description    | Treatment given to relevant population                            | Results                                                                                                                |
|--------------------|------------|----------|---------------------------|-------------------------------------------------------------------|------------------------------------------------------------------------------------------------------------------------|
| 24 Kneer 2013      | RCT        | 12 weeks | 866 patients with knee OA | 100, 50, or 25 mg ketoprofen, or placebo twice daily for 12 weeks | WOMAC function mean change:<br>Topical Ketoprofen 100 mg: -22.29 (-42.01% ± 35.69%)<br>Placebo: -20.09 (-36% ± 39.02%) |
| 3130 Trnavsky 2004 | RCT        | 8 days   | 50 patients with knee OA  | 25 patients with ibuprofen and 25 with placebo                    | VAS pain mean change: Ibuprofen -22.6, Placebo -12.32                                                                  |

|                          |     |          |                              |                                                      |                                                                                                                   |
|--------------------------|-----|----------|------------------------------|------------------------------------------------------|-------------------------------------------------------------------------------------------------------------------|
| 5506<br>Conaghan<br>2013 | RCT | 12 weeks | 464 patients with<br>knee OA | 100 mg ketoprofen<br>gel (n=230), placebo<br>(n=234) | Change in WOMAC physical function subscore at week<br>12 with the 100 mg ketoprofen dose 38.7%, placebo<br>35.3%. |
|--------------------------|-----|----------|------------------------------|------------------------------------------------------|-------------------------------------------------------------------------------------------------------------------|

## References:

1. Baraf, H. S. A. G. (2010). Safety and efficacy of topical diclofenac sodium 1% gel in knee osteoarthritis: a randomized controlled trial. *Phys Sportsmed*, 38(2), 19-28. doi:10.3810/psm.2010.06.1779 10.3810/psm.2010.06.1779.
2. Barthel, H. R., Haselwood, D., Longley, S., 3rd, Gold, M. S., & Altman, R. D. (2009). Randomized controlled trial of diclofenac sodium gel in knee osteoarthritis. *Semin Arthritis Rheum*, 39(3), 203-212. doi:10.1016/j.semarthrit.2009.09.002
3. Bookman, A. A., Williams, K. S., & Shainhouse, J. Z. (2004). Effect of a topical diclofenac solution for relieving symptoms of primary osteoarthritis of the knee: a randomized controlled trial. *CMAJ*, 171(4), 333-338. doi:10.1503/cmaj.1031793
4. Conaghan, P. G., Dickson, J., Bolten, W., Cevc, G., & Rother, M. (2013). A multicentre, randomized, placebo- and active-controlled trial comparing the efficacy and safety of topical ketoprofen in Transfersome gel (IDEA-033) with ketoprofen-free vehicle (TDT 064) and oral celecoxib for knee pain associated with osteoarthritis. *Rheumatology (Oxford)*, 52(7), 1303-1312. doi:10.1093/rheumatology/ket133
5. Dreiser, R. L., & Tisne-Camus, M. (1993). DHEP plasters as a topical treatment of knee osteoarthritis--a double-blind placebo-controlled study. *Drugs Exp Clin Res*, 19(3), 117-123.
6. Grace, D. A. R. (1999). Topical diclofenac versus placebo: a double blind, randomized clinical trial in patients with osteoarthritis of the knee. *J Rheumatol*, 26(12), 2659-2663.
7. Kneer, W., Rother, M., Mazgareanu, S., Seidel, E. J., & European, I.-s. g. (2013). A 12-week randomized study of topical therapy with three dosages of ketoprofen in Transfersome(R) gel (IDEA-033) compared with the ketoprofen-free vehicle (TDT 064), in patients with osteoarthritis of the knee. *J Pain Res*, 6, 743-753. doi:10.2147/JPR.S51054
8. Pa , A. U. T. B. (2005). Treatment of osteoarthritis of the knee with a topical diclofenac solution: a randomised controlled, 6-week trial. *BMC musculoskeletal disorders*, 6, 44. doi:10.1186/1471-2474-6-44
9. Roth, S. H., & Shainhouse, J. Z. (2004). Efficacy and safety of a topical diclofenac solution (pennsaid) in the treatment of primary osteoarthritis of the knee: a randomized, double-blind, vehicle-controlled clinical trial. *Arch Intern Med*, 164(18), 2017-2023. doi:10.1001/archinte.164.18.2017
10. Rother, M., & Conaghan, P. G. (2013). A randomized, double-blind, phase III trial in moderate osteoarthritis knee pain comparing topical ketoprofen gel with ketoprofen-free gel. *J Rheumatol*, 40(10), 1742-1748. doi:10.3899/jrheum.130192

11. Rother, M., Lavins, B. J., Kneer, W., Lehnhardt, K., Seidel, E. J., & Mazgareanu, S. (2007). Efficacy and safety of epicutaneous ketoprofen in Transfersome (IDEA-033) versus oral celecoxib and placebo in osteoarthritis of the knee: multicentre randomised controlled trial. *Ann Rheum Dis*, 66(9), 1178-1183. doi:10.1136/ard.2006.065128
12. Rovinsky, J. A. M. (2002). Treatment of knee osteoarthritis with a topical non-steroidal antiinflammatory drug. Results of a randomized, double-blind, placebo-controlled study on the efficacy and safety of a 5% ibuprofen cream. *Drugs Exp Clin Res*, 27(5-6), 209-221.
13. Simon, L. S., Grierson, L. M., Naseer, Z., Bookman, A. A., & Zev Shainhouse, J. (2009). Efficacy and safety of topical diclofenac containing dimethyl sulfoxide (DMSO) compared with those of topical placebo, DMSO vehicle and oral diclofenac for knee osteoarthritis. *Pain*, 143(3), 238-245. doi:10.1016/j.pain.2009.03.008
14. Simon, L. S. A. G. (2009). Efficacy and safety of topical diclofenac containing dimethyl sulfoxide (DMSO) compared with those of topical placebo, DMSO vehicle and oral diclofenac for knee osteoarthritis. *Pain*, 143(3), 238-245. doi:10.1016/j.pain.2009.03.008  
10.1016/j.pain.2009.03.008. Epub 2009 Apr 19.
15. Trnavsky, K., Fischer, M., Vogtle-Junkert, U., & Schreyger, F. (2004). Efficacy and safety of 5% ibuprofen cream treatment in knee osteoarthritis. Results of a randomized, double-blind, placebo-controlled study. *J Rheumatol*, 31(3), 565-572.
16. Varadi, G., Zhu, Z., Blattler, T., Hosle, M., Loher, A., Pokorny, R., . . . Carter, S. G. (2013). Randomized clinical trial evaluating transdermal Ibuprofen for moderate to severe knee osteoarthritis. *Pain Physician*, 16(6), E749-762.
17. Wadsworth, L. T. A. K. (2015). Efficacy and safety of diclofenac sodium 2% topical solution for osteoarthritis of the knee: a randomized, double-blind, vehicle-controlled, 4 week study. *Curr Med Res Opin*, 32(2), 241-250. doi:10.1185/03007995.2015.111340010.1185/03007995.2015.1113400. Epub 2015 Nov 17.

**PICO 97: Topical capsaicin versus no treatment in patients with knee or hip OA**

Summary: This PICO question is addressed by 3 direct RCTs that compared capsaicin to placebo. The results across all outcomes were slightly in favor of capsaicin, but with serious imprecision for WOMAC pain and function. VAS pain showed a small pain reduction that fell within the bounds of a non-clinically significant improvement.

Quality of Evidence across outcomes: Moderate.

**Table 1. Topical capsaicin compared to placebo for knee or hip OA**

| <b>Table 1. Topical capsaicin compared to placebo for knee or hip OA</b>  |                     |                      |                     |                      |                         |                                      |                            |                               |                                 |                                     |                                                                                   |
|---------------------------------------------------------------------------|---------------------|----------------------|---------------------|----------------------|-------------------------|--------------------------------------|----------------------------|-------------------------------|---------------------------------|-------------------------------------|-----------------------------------------------------------------------------------|
| <b>Certainty assessment</b>                                               |                     |                      |                     |                      |                         |                                      | <b>Summary of findings</b> |                               |                                 |                                     |                                                                                   |
| <b>№ of participants (studies) Follow-up</b>                              | <b>Risk of bias</b> | <b>Inconsistency</b> | <b>Indirectness</b> | <b>Imprecision</b>   | <b>Publication bias</b> | <b>Overall certainty of evidence</b> | <b>Number of patients</b>  |                               | <b>Relative effect (95% CI)</b> | <b>Anticipated absolute effects</b> |                                                                                   |
|                                                                           |                     |                      |                     |                      |                         |                                      | <b>With placebo</b>        | <b>With topical capsaicin</b> |                                 | <b>Risk with placebo</b>            | <b>Risk difference with topical capsaicin</b>                                     |
| <b>WOMAC pain, 12 weeks (0-20, lower scores indicate improvement)</b>     |                     |                      |                     |                      |                         |                                      |                            |                               |                                 |                                     |                                                                                   |
| 893 (2 RCTs)                                                              | not serious         | not serious          | not serious         | serious <sup>a</sup> | none                    | ⊕⊕⊕○<br>MODERATE                     | 450                        | 443                           | -                               | -                                   | <b>MD 1.92 lower</b><br>(4.78 lower to 0.94 higher)                               |
| <b>VAS score, 12 weeks (0-10, lower scores indicate improvement)</b>      |                     |                      |                     |                      |                         |                                      |                            |                               |                                 |                                     |                                                                                   |
| 198 (1 RCT)                                                               | not serious         | not serious          | not serious         | not serious          | none                    | ⊕⊕⊕⊕<br>HIGH                         | 99                         | 99                            | -                               | -                                   | <b>MD 0.73 lower</b><br>(1.27 lower to 0.19 lower)<br><br><b>Favors capsaicin</b> |
| <b>WOMAC function, 12 weeks (0-68, lower scores indicate improvement)</b> |                     |                      |                     |                      |                         |                                      |                            |                               |                                 |                                     |                                                                                   |



**Table 1. Topical capsaicin compared to placebo for knee or hip OA**

| Certainty assessment |             |             |             |                      |      |                  | Summary of findings |     |   |   |                                                     |
|----------------------|-------------|-------------|-------------|----------------------|------|------------------|---------------------|-----|---|---|-----------------------------------------------------|
| 893<br>(2 RCTs)      | not serious | not serious | not serious | serious <sup>a</sup> | none | ⊕⊕⊕○<br>MODERATE | 450                 | 443 | - | - | <b>MD 5.4 lower</b><br>(12.03 lower to 1.24 higher) |

CI: Confidence interval; MD: Mean difference

## Explanations

a. Wide CI crossing no-effect line

**Table 2. Systematic review data not suitable for RevMan**

| Author, year     | Study type | Duration | Population Description                | Treatment given to relevant population | Results                                                                  |
|------------------|------------|----------|---------------------------------------|----------------------------------------|--------------------------------------------------------------------------|
| 709 Laslett 2014 | SR         | 4 weeks  | 475 patients with knee OA from 5 RCTs | Capriacin or placebo over 4weeks       | Pooled VAS pain score over 4 weeks from 5 studies: SMD 0.44 [0.25, 0.62] |

## References:

1. Kosuwon, W., Sirichatiwapee, W., Wisanuyotin, T., Jeeravipoolvarn, P., & Laupattarakasem, W. (2010). Efficacy of symptomatic control of knee osteoarthritis with 0.0125% of capsaicin versus placebo. *J Med Assoc Thai*, 93(10), 1188-1195.
2. Laslett, L. L., & Jones, G. (2014). Capsaicin for osteoarthritis pain. *Prog Drug Res*, 68, 277-291.
3. Schnitzer, T. J., Pelletier, J. P., Haselwood, D. M., Ellison, W. T., Ervin, J. E., Gordon, R. D., . . . Bernstein, J. E. (2012). Civamide cream 0.075% in patients with osteoarthritis of the knee: a 12-week randomized controlled clinical trial with a longterm extension. *J Rheumatol*, 39(3), 610-620. doi:10.3899/jrheum.110192

**PICO 98: Topical NSAIDs compared to oral NSAIDs in patients with knee or hip OA**

Summary: This PICO question is addressed by 7 direct RCTs that compared topical NSAIDs to oral NSAIDs. The results showed no significant between-group difference for most pain and function outcomes, but for some of these outcomes the finding was imprecise due to wide CIs that included the possibility of a between-group difference. Severe adverse event rates did not differ significantly between groups but the finding was imprecise due to the low number of events.

Quality of Evidence across all critical outcomes: Low

| <b>Table 1. Topical NSAID compared to oral NSAID for knee and hip OA</b> |                      |                      |                     |                      |                         |                                      |                            |                           |                                 |                                     |                                                        |
|--------------------------------------------------------------------------|----------------------|----------------------|---------------------|----------------------|-------------------------|--------------------------------------|----------------------------|---------------------------|---------------------------------|-------------------------------------|--------------------------------------------------------|
| <b>Certainty assessment</b>                                              |                      |                      |                     |                      |                         |                                      | <b>Summary of findings</b> |                           |                                 |                                     |                                                        |
| <b>Nº of participants (studies) Follow-up</b>                            | <b>Risk of bias</b>  | <b>Inconsistency</b> | <b>Indirectness</b> | <b>Imprecision</b>   | <b>Publication bias</b> | <b>Overall certainty of evidence</b> | <b>Number of patients</b>  |                           | <b>Relative effect (95% CI)</b> | <b>Anticipated absolute effects</b> |                                                        |
|                                                                          |                      |                      |                     |                      |                         |                                      | <b>With oral NSAID</b>     | <b>With topical NSAID</b> |                                 | <b>Risk with oral NSAID</b>         | <b>Risk difference with topical NSAID</b>              |
| <b>WOMAC pain, 2 weeks (0-500, lower scores indicate improvement)</b>    |                      |                      |                     |                      |                         |                                      |                            |                           |                                 |                                     |                                                        |
| 19 (1 RCT)                                                               | serious <sup>a</sup> | not serious          | not serious         | serious <sup>b</sup> | none                    | ⊕⊕○○<br>LOW                          | 9                          | 10                        | -                               | -                                   | MD <b>1.7 lower</b><br>(105.22 lower to 101.82 higher) |
| <b>WOMAC pain, 12 weeks (lower scores indicate improvement)</b>          |                      |                      |                     |                      |                         |                                      |                            |                           |                                 |                                     |                                                        |

**Table 1. Topical NSAID compared to oral NSAID for knee and hip OA**

| Certainty assessment                                                        |                      |             |             |                      |      |                  | Summary of findings |     |   |   |                                                         |
|-----------------------------------------------------------------------------|----------------------|-------------|-------------|----------------------|------|------------------|---------------------|-----|---|---|---------------------------------------------------------|
| 1642<br>(4 studies)                                                         | not serious          | not serious | not serious | not serious          | none | ⊕⊕⊕⊕<br>HIGH     | 817                 | 825 | - | - | SMD <b>0.07 higher</b><br>(0.03 lower to 0.17 higher)   |
| <b>pain on walking, 12 weeks (0-100, lower scores indicate improvement)</b> |                      |             |             |                      |      |                  |                     |     |   |   |                                                         |
| 604<br>(1 RCT)                                                              | not serious          | not serious | not serious | serious <sup>c</sup> | none | ⊕⊕⊕○<br>MODERATE | 301                 | 303 | - | - | MD <b>1.7 higher</b><br>(2.96 lower to 6.36 higher)     |
| <b>WOMAC function, 2 weeks (0-1700, lower scores indicate improvement)</b>  |                      |             |             |                      |      |                  |                     |     |   |   |                                                         |
| 19<br>(1 RCT)                                                               | serious <sup>a</sup> | not serious | not serious | serious <sup>b</sup> | none | ⊕⊕○○<br>LOW      | 9                   | 10  | - | - | MD <b>11.1 lower</b><br>(366.14 lower to 343.94 higher) |
| <b>WOMAC function, 12 weeks (lower scores indicate improvement)</b>         |                      |             |             |                      |      |                  |                     |     |   |   |                                                         |

**Table 1. Topical NSAID compared to oral NSAID for knee and hip OA**

| Certainty assessment                                                     |                      |             |             |                      |      |                  | Summary of findings |                 |                                  |              |                                                                                         |
|--------------------------------------------------------------------------|----------------------|-------------|-------------|----------------------|------|------------------|---------------------|-----------------|----------------------------------|--------------|-----------------------------------------------------------------------------------------|
| 1179<br>(3 studies)                                                      | not serious          | not serious | not serious | serious <sup>c</sup> | none | ⊕⊕⊕○<br>MODERATE | 584                 | 595             | -                                | -            | SMD <b>0.17 higher</b><br>(0.06 higher to 0.29 higher)<br><br><b>Favors oral NSAIDs</b> |
| <b>WOMAC total, 12 months (0-100, lower scores indicate improvement)</b> |                      |             |             |                      |      |                  |                     |                 |                                  |              |                                                                                         |
| 282<br>(1 RCT)                                                           | serious <sup>d</sup> | not serious | not serious | not serious          | none | ⊕⊕⊕○<br>MODERATE | 144                 | 138             | -                                | -            | MD <b>1.6 higher</b><br>(2.37 lower to 5.57 higher)                                     |
| <b>SAE, 12 weeks</b>                                                     |                      |             |             |                      |      |                  |                     |                 |                                  |              |                                                                                         |
| 463<br>(1 study)                                                         | serious <sup>d</sup> | not serious | not serious | serious <sup>c</sup> | none | ⊕⊕○○<br>LOW      | 4/233<br>(1.7%)     | 3/230<br>(1.3%) | <b>OR 0.76</b><br>(0.17 to 3.42) | 17 per 1,000 | <b>4 fewer per 1,000</b><br>(14 fewer to 39 more)                                       |

**CI:** Confidence interval; **MD:** Mean difference

### Explanations

- a. Patients and personnel not blinded
- b. Wide CI crossing no-effect line, small sample size
- c. Wide CI crossing no-effect line

d. Data not fully reported

**Table 2. RCT data not suitable for effect size calculation or combining with other data**

| Author, year       | Study type | Duration  | Population Description    | Treatment given to relevant population                                                               | Results                                                                                                                                                                                                                                                                                       |
|--------------------|------------|-----------|---------------------------|------------------------------------------------------------------------------------------------------|-----------------------------------------------------------------------------------------------------------------------------------------------------------------------------------------------------------------------------------------------------------------------------------------------|
| 198 Underwood 2007 | RCT        | 12 months | 282 patients with knee OA | topical (n=138) oral (n=144)                                                                         | Change in WOMAC from baseline to 12 months, for topical minus oral treatment: Pain 1 (-4 to 6); function 3 (-2 to 7).<br>Mean difference in SF-36 (topical-oral) in change from baseline to 12 months: Physical component score -1.6 (-3.5 to 0.3); Mental component score -1.0 (-3.4 to 1.3) |
| 1158 Gor 2016      | RCT        | 7 days    | 50 patients with knee OA  | oral diclofenac 50 mg t.i.d. vs oral diclofenac 75 mg plus 10mg topical diclofenac t.i.d. for 7 days | VAS score mean change: -3.84 vs -4.6<br>Lequesne Index change: -4.68 (9.12 pre and 4.44 post) vs (3.6 post)                                                                                                                                                                                   |

**References:**

1. Conaghan, P. G., Dickson, J., Bolten, W., Cevc, G., & Rother, M. (2013). A multicentre, randomized, placebo- and active-controlled trial comparing the efficacy and safety of topical ketoprofen in Transfersome gel (IDEA-033) with ketoprofen-free vehicle (TDT 064) and oral celecoxib for knee pain associated with osteoarthritis. *Rheumatology (Oxford)*, 52(7), 1303-1312. doi:10.1093/rheumatology/ket133
2. Gor, A. A. K. (2016). A comparative study of efficacy and safety of oral diclofenac and decreased dose of diclofenac plus topical diclofenac in treatment of knee osteoarthritis. *International Journal of Pharmaceutical Sciences and Research*, 7(5), 2083-2089. doi:10.13040/IJPSR.0975-8232.7%285%29.2083-89
3. Rother, M., Lavins, B. J., Kneer, W., Lehnhardt, K., Seidel, E. J., & Mazgareanu, S. (2007). Efficacy and safety of epicutaneous ketoprofen in Transfersome (IDEA-033) versus oral celecoxib and placebo in osteoarthritis of the knee: multicentre randomised controlled trial. *Ann Rheum Dis*, 66(9), 1178-1183. doi:10.1136/ard.2006.065128

4. Simon, L. S., Grierson, L. M., Naseer, Z., Bookman, A. A., & Zev Shainhouse, J. (2009). Efficacy and safety of topical diclofenac containing dimethyl sulfoxide (DMSO) compared with those of topical placebo, DMSO vehicle and oral diclofenac for knee osteoarthritis. *Pain*, 143(3), 238-245. doi:10.1016/j.pain.2009.03.008
5. Tiso, R. L., Tong-Ngork, S., & Fredlund, K. L. (2010). Oral versus topical Ibuprofen for chronic knee pain: a prospective randomized pilot study. *Pain Physician*, 13(5), 457-467.
6. Tugwell, P. S. A. W. (2004). Equivalence study of a topical diclofenac solution (pennsaid) compared with oral diclofenac in symptomatic treatment of osteoarthritis of the knee: a randomized controlled trial. *J Rheumatol*, 31(10), 2002-2012.
7. Underwood, M., Ashby, D., Cross, P., Hennessy, E., Letley, L., Martin, J., . . . team, T. s. (2008). Advice to use topical or oral ibuprofen for chronic knee pain in older people: randomised controlled trial and patient preference study. *BMJ*, 336(7636), 138-142. doi:10.1136/bmj.39399.656331.25

**PICO 99. Topical capsaicin compared to oral NSAIDs in patients with knee or hip OA**

Summary. The literature searches did not identify any studies that addressed this question.

Quality of evidence across all critical outcomes: Very low

**PICO 100: Topical lidocaine compared to oral NSAIDs for knee OA**

Summary: The literature search identified one RCT<sup>[1]</sup> that directly compared topical lidocaine with oral NSAIDs for the treatment of knee OA. Kivitz et al.<sup>[1]</sup> compared a 5% lidocaine patch to celecoxib (200mg/d) over a 12-week treatment period. There was moderate certainty of no difference in pain or self-reported function at 12 weeks. There was also no difference in skin reactions between groups, however there was low certainty in this finding as the confidence interval was wide.

Quality of evidence across all critical outcomes: Low

| <b>Topical lidocaine compared to Oral NSAIDs for Knee OA</b> |                     |                      |                     |                    |                         |                          |                                                    |                                 |                                     |
|--------------------------------------------------------------|---------------------|----------------------|---------------------|--------------------|-------------------------|--------------------------|----------------------------------------------------|---------------------------------|-------------------------------------|
| <b>Certainty assessment</b>                                  |                     |                      |                     |                    |                         |                          | <b>Summary of findings</b>                         |                                 |                                     |
| <b>Nº of participants</b>                                    | <b>Risk of bias</b> | <b>Inconsistency</b> | <b>Indirectness</b> | <b>Imprecision</b> | <b>Publication bias</b> | <b>Overall certainty</b> | <b>Number of patients or Study event rates (%)</b> | <b>Relative effect (95% CI)</b> | <b>Anticipated absolute effects</b> |
|                                                              |                     |                      |                     |                    |                         |                          |                                                    |                                 |                                     |

## Topical lidocaine compared to Oral NSAIDs for Knee OA

| Certainty assessment                                            |                      |             |             |                      |      |                  | Summary of findings                         |                              |                                  |                                                     |                                                     |
|-----------------------------------------------------------------|----------------------|-------------|-------------|----------------------|------|------------------|---------------------------------------------|------------------------------|----------------------------------|-----------------------------------------------------|-----------------------------------------------------|
| (studies)<br>Follow-up                                          |                      |             |             |                      |      | of<br>evidence   | With<br>Oral<br>NSAIDs<br>for<br>Knee<br>OA | With<br>Topical<br>lidocaine |                                  | Risk<br>with<br>Oral<br>NSAIDs<br>for<br>Knee<br>OA | Risk<br>difference<br>with<br>Topical<br>lidocaine  |
| <b>WOMAC Pain (0-20, lower scores indicate improvement)</b>     |                      |             |             |                      |      |                  |                                             |                              |                                  |                                                     |                                                     |
| 143<br>(1 RCT)                                                  | serious <sup>a</sup> | not serious | not serious | not serious          | none | ⊕⊕⊕○<br>MODERATE | 74                                          | 69                           | -                                | -                                                   | MD <b>0.4 lower</b><br>(2.63 lower to 1.83 higher)  |
| <b>WOMAC function (0-68, lower scores indicate improvement)</b> |                      |             |             |                      |      |                  |                                             |                              |                                  |                                                     |                                                     |
| 143<br>(1 RCT)                                                  | serious <sup>a</sup> | not serious | not serious | not serious          | none | ⊕⊕⊕○<br>MODERATE | 74                                          | 69                           | -                                | -                                                   | MD <b>1.6 higher</b><br>(5.57 lower to 8.77 higher) |
| <b>Safety: Skin Reaction</b>                                    |                      |             |             |                      |      |                  |                                             |                              |                                  |                                                     |                                                     |
| 143<br>(1 RCT)                                                  | serious <sup>a</sup> | not serious | not serious | serious <sup>b</sup> | none | ⊕⊕○○<br>LOW      | 3/74<br>(4.1%)                              | 4/69<br>(5.8%)               | <b>OR 1.46</b><br>(0.31 to 6.75) | 41 per 1,000                                        | <b>18 more per 1,000</b><br>(28 fewer to 181 more)  |

**CI:** Confidence interval; **MD:** Mean difference; **OR:** Odds ratio

### Explanations

- a. Blinding practices not described
- b. Wide 95% confidence interval

**References**

1. Kivitz A, Fairfax M, Sheldon EA, Xiang Q, Jones BA, Gammaitoni AR, et al. Comparison of the effectiveness and tolerability of lidocaine patch 5% versus celecoxib for osteoarthritis-related knee pain: post hoc analysis of a 12 week, prospective, randomized, active-controlled, open-label, parallel-group trial in adults. Clin Ther. 2008;30(12):2366-2377.

**PICO 101. Topical capsaicin compared to topical NSAIDs in patients with knee or hip OA**

Summary. The literature searches did not identify any studies that directly addressed this question. However, a recent network meta-analysis performed an indirect comparison of capsaicin and topical NSAIDs using 28 placebo-controlled trials (5 RCTs comparing capsaicin vs. placebo, 23 RCTs comparing topical NSAIDs vs. placebo). The primary outcome was pain at or nearest to 4 weeks, and the analysis found no significant difference between treatments. Average risk of bias was serious, and the quality of evidence was further downgraded by the indirect comparison and by imprecision in the effect estimate.

Quality of evidence across all critical outcomes: Very low

**Table 1. Network meta-analysis data**

| Author, year | Study type | Duration | Population Description | Treatment given to relevant population                                      | Results                                                           |
|--------------|------------|----------|------------------------|-----------------------------------------------------------------------------|-------------------------------------------------------------------|
| Persson 2018 | SR         | 4 weeks  | Patients with knee OA  | Capsaicin (5 RCTs, 206 patients)<br>Topical NSAIDs (23 RCTs, 3693 patients) | Pain at or nearest to 4 weeks:<br>SMD 0.04 (95% CI -0.26 to 0.33) |

**References**

1. Persson MSM, Stocks J, Walsh DA, Doherty M, Zhang W. The relative efficacy of topical non-steroidal anti-inflammatory drugs and capsaicin in osteoarthritis: a network meta-analysis of randomised controlled trials. Osteoarth Cart 2018;26:1575-1582.



**PICO 102: Ablation + usual care vs. Usual care for knee/hip OA**

Summary: The search identified 2 RCTs that directly addressed this PICO question, and 2 that indirectly addressed the comparison. Radnovich et al.<sup>[1]</sup> randomized 180 patients with knee OA to receive either cryoneurolysis or a sham procedure. WOMAC pain and function showed a significant between-group difference favoring ablation at 4 weeks (the primary endpoint, Table 1) and 3 months (data not shown); the between-group difference became non-significant for both outcomes at 4 months (data not shown). Another RCT (Choi et al. 2011<sup>[2]</sup>) compared conventional RFA to a sham control group. The RFA group significantly improved VAS knee pain compared to controls at 3 months follow-up (Table 1). No AEs were reported. These two RCTs had low risk of bias. However, the smaller study by Choi et al. had a much larger effect size than Radnovich et al., so we did not perform a meta-analysis of pain data from these 2 trials.

For the intra-articular injection studies, one RCT (Shen et al. 2017<sup>[3]</sup>) compared conventional RFA plus intra-articular PRP and HA injections to a control group receiving intra-articular PRP and HA. At 3 months follow-up, the RFA group significantly improved knee pain and function compared to controls (measured using the VAS and SF-36)(Table 2). Walking and stair climbing similarly showed improvements favoring ablation. No serious AEs were reported. Davis et al.<sup>[4]</sup> compared cooled RFA to intra-articular steroid injection (control) and found a statistically significant between-group difference in NRS pain favoring ablation at 3 months (Table 2) and 6 months (data not shown). Although serious AEs did not differ significantly between groups, the event rates were too low to rule out the possibility of a between-group difference.

A literature search update in August 2018 identified one additional relevant RCT<sup>[5]</sup> comparing RFA to conventional oral analgesics (NSAIDs or acetaminophen). This study’s findings were in agreement with the findings of the overall evidence base.

Quality of evidence across all critical outcomes: Moderate (for direct comparison data)

| <b>Table 1. Ablation compared to Sham Ablation for OA Knee</b> |                     |                      |                     |                    |                         |                                      |                            |                      |                                 |                                     |                                      |
|----------------------------------------------------------------|---------------------|----------------------|---------------------|--------------------|-------------------------|--------------------------------------|----------------------------|----------------------|---------------------------------|-------------------------------------|--------------------------------------|
| <b>Certainty assessment</b>                                    |                     |                      |                     |                    |                         |                                      | <b>Summary of findings</b> |                      |                                 |                                     |                                      |
| <b>Nº of participants (studies) Follow-up</b>                  | <b>Risk of bias</b> | <b>Inconsistency</b> | <b>Indirectness</b> | <b>Imprecision</b> | <b>Publication bias</b> | <b>Overall certainty of evidence</b> | <b>Number of patients</b>  |                      | <b>Relative effect (95% CI)</b> | <b>Anticipated absolute effects</b> |                                      |
|                                                                |                     |                      |                     |                    |                         |                                      | <b>With Placebo</b>        | <b>With Ablation</b> |                                 | <b>Risk with Placebo</b>            | <b>Risk difference with Ablation</b> |
| <b>VAS (0-100, 12 weeks)</b>                                   |                     |                      |                     |                    |                         |                                      |                            |                      |                                 |                                     |                                      |

**Table 1. Ablation compared to Sham Ablation for OA Knee**

| Certainty assessment                                          |             |             |             |                      |      |                  | Summary of findings |     |   |   |                                                                                   |
|---------------------------------------------------------------|-------------|-------------|-------------|----------------------|------|------------------|---------------------|-----|---|---|-----------------------------------------------------------------------------------|
| 35<br>(1 RCT)                                                 | not serious | not serious | not serious | serious <sup>a</sup> | none | ⊕⊕⊕○<br>MODERATE | 18                  | 17  | - | - | MD <b>35.5 lower</b><br>(48.4 lower to 22.6 lower)<br><br><b>Favors ablation</b>  |
| <b>WOMAC pain (0-50, change from baseline) - 4 weeks</b>      |             |             |             |                      |      |                  |                     |     |   |   |                                                                                   |
| 180<br>(1 RCT)                                                | not serious | not serious | not serious | not serious          | none | ⊕⊕⊕⊕<br>HIGH     | 59                  | 121 | - | - | MD <b>7.11 lower</b><br>(11.15 lower to 3.07 lower)<br><br><b>Favors ablation</b> |
| <b>WOMAC function (0-170, change from baseline) - 4 weeks</b> |             |             |             |                      |      |                  |                     |     |   |   |                                                                                   |
| 180<br>(1 RCT)                                                | not serious | not serious | not serious | not serious          | none | ⊕⊕⊕⊕<br>HIGH     | 59                  | 121 | - | - | MD <b>21.3 lower</b><br>(34.46 lower to 8.14 lower)<br><br><b>Favors ablation</b> |

CI: Confidence interval; MD: Mean difference

**Explanations**

a Small study with large effect size

**Table 2. Ablation compared to intra-articular injections for OA Knee**

| <b>Table 2. Ablation compared to intra-articular injections for OA Knee</b> |                        |                      |                      |                    |                         |                                      |                                        |                      |                                 |                                             |                                                                              |  |
|-----------------------------------------------------------------------------|------------------------|----------------------|----------------------|--------------------|-------------------------|--------------------------------------|----------------------------------------|----------------------|---------------------------------|---------------------------------------------|------------------------------------------------------------------------------|--|
| <b>Certainty assessment</b>                                                 |                        |                      |                      |                    |                         |                                      | <b>Summary of findings</b>             |                      |                                 |                                             |                                                                              |  |
| <b>№ of participants (studies) Follow-up</b>                                | <b>Risk of bias</b>    | <b>Inconsistency</b> | <b>Indirectness</b>  | <b>Imprecision</b> | <b>Publication bias</b> | <b>Overall certainty of evidence</b> | <b>Number of patients</b>              |                      | <b>Relative effect (95% CI)</b> | <b>Anticipated absolute effects</b>         |                                                                              |  |
|                                                                             |                        |                      |                      |                    |                         |                                      | <b>With intra-articular injections</b> | <b>With Ablation</b> |                                 | <b>Risk with intra-articular injections</b> | <b>Risk difference with Ablation</b>                                         |  |
| <b>Pain (0-10, combined VAS and NRS) (at 3 months)</b>                      |                        |                      |                      |                    |                         |                                      |                                        |                      |                                 |                                             |                                                                              |  |
| 187<br>(2 RCTs)                                                             | serious <sub>a,b</sub> | not serious          | serious <sup>c</sup> | not serious        | none                    | ⊕⊕○○<br>LOW                          | 95                                     | 92                   | -                               | -                                           | MD <b>2.19 lower</b><br>(2.66 lower to 1.73 lower)<br><b>Favors ablation</b> |  |
| <b>Pain VAS (0-10, 3 months) – Ablation + PRP + HA vs. PRP + HA</b>         |                        |                      |                      |                    |                         |                                      |                                        |                      |                                 |                                             |                                                                              |  |
| 54<br>(1 RCT)                                                               | serious <sub>a</sub>   | not serious          | serious <sup>c</sup> | not serious        | none                    | ⊕⊕○○<br>LOW                          | 27                                     | 27                   | -                               | -                                           | MD <b>2.04 lower</b><br>(2.65 lower to 1.43 lower)<br><b>Favors ablation</b> |  |
| <b>Pain NRS (0-10, 3 months) - Ablation vs. Intra-articular CS</b>          |                        |                      |                      |                    |                         |                                      |                                        |                      |                                 |                                             |                                                                              |  |
| 133<br>(1 RCT)                                                              | serious <sub>b</sub>   | not serious          | serious <sup>c</sup> | not serious        | none                    | ⊕⊕○○<br>LOW                          | 68                                     | 65                   | -                               | -                                           | MD <b>2.4 lower</b><br>(3.12 lower to 1.68 lower)<br><b>Favors ablation</b>  |  |

**Table 2. Ablation compared to intra-articular injections for OA Knee**

| Certainty assessment                                                                  |                      |             |                      |             |      | Summary of findings |    |    |   |   |                                                                                      |
|---------------------------------------------------------------------------------------|----------------------|-------------|----------------------|-------------|------|---------------------|----|----|---|---|--------------------------------------------------------------------------------------|
| <b>SF - 36 physical function (0-100, 3 months) - Ablation + PRP + HA vs. PRP + HA</b> |                      |             |                      |             |      |                     |    |    |   |   |                                                                                      |
| 54<br>(1 RCT)                                                                         | serious <sup>a</sup> | not serious | serious <sup>c</sup> | not serious | none | ⊕⊕○○<br>LOW         | 27 | 27 | - | - | MD <b>9.55 higher</b><br>(4.08 higher to 15.02 higher)<br><br><b>Favors ablation</b> |
| <b>Walking (at 3 months) - Ablation + PRP + HA vs. PRP + HA</b>                       |                      |             |                      |             |      |                     |    |    |   |   |                                                                                      |
| 54<br>(1 RCT)                                                                         | serious <sup>a</sup> | not serious | serious <sup>c</sup> | not serious | none | ⊕⊕○○<br>LOW         | 27 | 27 | - | - | MD <b>9.95 higher</b><br>(5.03 higher to 14.87 higher)<br><br><b>Favors ablation</b> |
| <b>Stair climbing (at 3 months) - Ablation + PRP + HA vs. PRP + HA</b>                |                      |             |                      |             |      |                     |    |    |   |   |                                                                                      |
| 54<br>(1 RCT)                                                                         | serious <sup>a</sup> | not serious | serious <sup>c</sup> | not serious | none | ⊕⊕○○<br>LOW         | 27 | 27 | - | - | MD <b>13.75 higher</b><br>(8.8 higher to 18.7 higher)<br><br><b>Favors ablation</b>  |
| <b>SAE (at 6 months) - Ablation vs. Intra-articular steroids</b>                      |                      |             |                      |             |      |                     |    |    |   |   |                                                                                      |

**Table 2. Ablation compared to intra-articular injections for OA Knee**

| Certainty assessment |                      |             |                      |                      |      |                  | Summary of findings |                |                                  |               |                                                    |
|----------------------|----------------------|-------------|----------------------|----------------------|------|------------------|---------------------|----------------|----------------------------------|---------------|----------------------------------------------------|
| 151<br>(1 RCT)       | serious <sup>b</sup> | not serious | serious <sup>c</sup> | serious <sup>d</sup> | none | ⊕○○○<br>VERY LOW | 8/75<br>(10.7%)     | 4/76<br>(5.3%) | <b>OR 0.47</b><br>(0.13 to 1.62) | 107 per 1,000 | <b>54 fewer per 1,000</b><br>(91 fewer to 55 more) |

**CI:** Confidence interval; **MD:** Mean difference; **OR:** Odds ratio

**Explanations**

- a No information on allocation concealment or blinding
- b No blinding
- c Intraarticular injection is not a usual care comparison
- d Wide 95% CI that crosses line of no difference

**References**

1. Radnovich R, Scott D, Patel AT, Olson R, Dasa V, Segal N, Lane NE, et al. Cryoneurolysis to treat the pain and symptoms of knee osteoarthritis: a multicenter, randomized, double-blind, sham-controlled trial. *Osteoarth Cart* 2017; 25: 1247-1256.
2. Choi WJ, Hwang SJ, Song JG, Leem JG, Kang YU, Park PH, Shin JW. Radiofrequency treatment relieves chronic knee osteoarthritis pain: A double-blind randomized controlled trial. *Pain* 2011; 152:481-487.
3. Shen WS, Xu XQ, Zhai NN, Zhou ZS, Shao J, Yu YH. Radiofrequency thermo-coagulation in relieving refractory pain of knee osteoarthritis. *Am J Ther* 2017; 24:693-700.
4. Davis T, Loudermilk E, DePalma M, Hunter C, Lindley D, Patel N, et al. Prospective, multicenter, randomized, crossover clinical trial comparing the safety and effectiveness of cooled radiofrequency ablation with corticosteroid injection in the management of knee pain from osteoarthritis. *Reg Anesth Pain Med* 2018;43: 84-91.
5. El-Hakeim EH, Elawamy A, Kamel EZ, Goma SH, Gamal RM, Ghandour AM, et al. Fluoroscopic Guided Radiofrequency of Genicular Nerves for Pain Alleviation in Chronic Knee Osteoarthritis: A Single-Blind Randomized Controlled Trial. *Pain Physician*. 2018;21(2):169-177.

**PICO 103: Lateral or medial wedged insole plus usual care compared to usual care for knee OA**

Summary: This PICO question is addressed by 12 direct RCTs. The mean change values for most pain and function outcomes showed no significant between-group difference for lateral wedge insoles vs neutral insoles, with all results imprecise (Table 1). The results significantly favored lateral wedge insole treatment for VAS pain and Lequesne’s index at 12 weeks. Medial wedged insoles had significantly more favorable

results than neutral insoles in WOMAC pain at 8 weeks and VAS pain on movement at 8 weeks (Table 3). The result for KOOS at 3 months showed no significant difference between lateral or medial wedged insoles and usual care (Table 3)

Quality of Evidence across outcomes: Low

| <b>Table 1. Lateral wedged insole compared to neutral insole for medial OA + usual care versus usual care for knee OA</b> |                      |                      |                     |                      |                         |                                      |                            |                                   |                                 |                                     |                                                       |
|---------------------------------------------------------------------------------------------------------------------------|----------------------|----------------------|---------------------|----------------------|-------------------------|--------------------------------------|----------------------------|-----------------------------------|---------------------------------|-------------------------------------|-------------------------------------------------------|
| <b>Certainty assessment</b>                                                                                               |                      |                      |                     |                      |                         |                                      | <b>Summary of findings</b> |                                   |                                 |                                     |                                                       |
| <b>Nº of participants (studies) Follow-up</b>                                                                             | <b>Risk of bias</b>  | <b>Inconsistency</b> | <b>Indirectness</b> | <b>Imprecision</b>   | <b>Publication bias</b> | <b>Overall certainty of evidence</b> | <b>Number of patients</b>  |                                   | <b>Relative effect (95% CI)</b> | <b>Anticipated absolute effects</b> |                                                       |
|                                                                                                                           |                      |                      |                     |                      |                         |                                      | <b>With neutral insole</b> | <b>With Lateral wedged insole</b> |                                 | <b>Risk with neutral insole</b>     | <b>Risk difference with Lateral wedged insole</b>     |
| <b>WOMAC pain, 12 months (lower scores indicate improvement)</b>                                                          |                      |                      |                     |                      |                         |                                      |                            |                                   |                                 |                                     |                                                       |
| 266 (2 RCTs)                                                                                                              | not serious          | serious <sup>a</sup> | not serious         | serious <sup>b</sup> | none                    | ⊕⊕○○<br>LOW                          | 128                        | 138                               | -                               | -                                   | <b>SMD 0.31 lower</b><br>(1.30 lower to 0.68 higher)  |
| <b>WOMAC pain, 24 months (lower scores indicate improvement)</b>                                                          |                      |                      |                     |                      |                         |                                      |                            |                                   |                                 |                                     |                                                       |
| 156 (1 RCT)                                                                                                               | serious <sup>d</sup> | not serious          | not serious         | serious <sup>b</sup> | none                    | ⊕⊕○○<br>LOW                          | 74                         | 82                                | -                               | -                                   | <b>SMD 0.14 higher</b><br>(0.17 lower to 0.46 higher) |

**Table 1. Lateral wedged insole compared to neutral insole for medial OA + usual care versus usual care for knee OA**

| Certainty assessment                                                        |                        |             |             |                      |      | Summary of findings |                  |                  |                           |               |                                                                                        |
|-----------------------------------------------------------------------------|------------------------|-------------|-------------|----------------------|------|---------------------|------------------|------------------|---------------------------|---------------|----------------------------------------------------------------------------------------|
| <b>WOMAC pain improved, 6 months (lower scores indicate improvement)</b>    |                        |             |             |                      |      |                     |                  |                  |                           |               |                                                                                        |
| 156<br>(1 RCT)                                                              | serious <sub>c,d</sub> | not serious | not serious | serious <sup>b</sup> | none | ⊕⊕○○<br>LOW         | 16/74<br>(21.6%) | 16/82<br>(19.5%) | OR 0.88<br>(0.40 to 1.91) | 216 per 1,000 | <b>21 fewer per 1,000</b><br>(117 fewer to 129 more)                                   |
| <b>Pain on walking, 12 months (0-10, lower scores indicate improvement)</b> |                        |             |             |                      |      |                     |                  |                  |                           |               |                                                                                        |
| 200<br>(1 RCT)                                                              | not serious            | not serious | not serious | not serious          | none | ⊕⊕⊕⊕<br>HIGH        | 97               | 103              | -                         | -             | MD <b>0.5 higher</b><br>(0.17 lower to 1.17 higher)                                    |
| <b>VAS pain, 12 weeks (lower scores indicate improvement)</b>               |                        |             |             |                      |      |                     |                  |                  |                           |               |                                                                                        |
| 263<br>(3 RCTs)                                                             | serious <sub>c,d</sub> | not serious | not serious | not serious          | none | ⊕⊕⊕○<br>MODERATE    | 130              | 133              | -                         | -             | SMD <b>0.90 lower</b><br>(1.64 lower to 0.15 lower)<br><br><b>Favors lateral wedge</b> |
| <b>Lequesne's index, 12 weeks (lower scores indicate improvement)</b>       |                        |             |             |                      |      |                     |                  |                  |                           |               |                                                                                        |

**Table 1. Lateral wedged insole compared to neutral insole for medial OA + usual care versus usual care for knee OA**

| Certainty assessment                                                 |                      |             |             |             |      | Summary of findings |     |     |   |   |                                                                                       |
|----------------------------------------------------------------------|----------------------|-------------|-------------|-------------|------|---------------------|-----|-----|---|---|---------------------------------------------------------------------------------------|
| 79<br>(1 RCT)                                                        | serious <sup>d</sup> | not serious | not serious | not serious | none | ⊕⊕⊕○<br>MODERATE    | 38  | 41  | - | - | MD <b>2.34 lower</b><br>(4.37 lower to 0.31 lower)<br><br><b>Favors lateral wedge</b> |
| <b>WOMAC function, 12 months (lower scores indicate improvement)</b> |                      |             |             |             |      |                     |     |     |   |   |                                                                                       |
| 266<br>(2 RCTs)                                                      | serious <sup>c</sup> | not serious | not serious | not serious | none | ⊕⊕⊕○<br>MODERATE    | 128 | 138 | - | - | SMD <b>0.35 lower</b><br>(1.26 lower to 0.56 higher)                                  |
| <b>WOMAC function, 24 months (lower scores indicate improvement)</b> |                      |             |             |             |      |                     |     |     |   |   |                                                                                       |
| 156<br>(1 RCT)                                                       | serious <sup>d</sup> | not serious | not serious | not serious | none | ⊕⊕⊕○<br>MODERATE    | 74  | 82  | - | - | SMD <b>0.18 higher</b><br>(0.13 lower to 0.50 higher)                                 |
| <b>WOMAC function improved, 6 months</b>                             |                      |             |             |             |      |                     |     |     |   |   |                                                                                       |



**Table 1. Lateral wedged insole compared to neutral insole for medial OA + usual care versus usual care for knee OA**

| Certainty assessment |                       |             |             |                      |      |             | Summary of findings |                  |                              |                  |                                                               |
|----------------------|-----------------------|-------------|-------------|----------------------|------|-------------|---------------------|------------------|------------------------------|------------------|---------------------------------------------------------------|
| 156<br>(1 RCT)       | serious<br><i>c,d</i> | not serious | not serious | serious <sup>b</sup> | none | ⊕⊕○○<br>LOW | 10/74<br>(13.5%)    | 10/82<br>(12.2%) | OR 0.89<br>(0.35 to<br>2.27) | 135 per<br>1,000 | <b>13 fewer<br/>per 1,000</b><br>(83 fewer<br>to 127<br>more) |

CI: Confidence interval; MD: Mean difference; OR: Odds ratio

### Explanations

- a. High I-squared and Chi-squared values
- b. Wide CI crossing significant effect and no-effect lines
- c. The bias might be from not blinding assessor
- d. Patients and personnel were not blinded

**Table 2. Medial insole compared to Neutral insole for lateral OA + usual care versus usual care for knee OA**

| Certainty assessment                      |              |               |              |             |                  |                               | Summary of findings |                    |                          |                              |                                    |
|-------------------------------------------|--------------|---------------|--------------|-------------|------------------|-------------------------------|---------------------|--------------------|--------------------------|------------------------------|------------------------------------|
| No of participants (studies)<br>Follow-up | Risk of bias | Inconsistency | Indirectness | Imprecision | Publication bias | Overall certainty of evidence | Number of patients  |                    | Relative effect (95% CI) | Anticipated absolute effects |                                    |
|                                           |              |               |              |             |                  |                               | With Neutral insole | With Medial insole |                          | Risk with Neutral insole     | Risk difference with Medial insole |
|                                           |              |               |              |             |                  |                               |                     |                    |                          |                              |                                    |

**Table 2. Medial insole compared to Neutral insole for lateral OA + usual care versus usual care for knee OA**

| Certainty assessment                                                           |                      |             |             |                      |      | Summary of findings |    |    |   |   |                                                                                        |
|--------------------------------------------------------------------------------|----------------------|-------------|-------------|----------------------|------|---------------------|----|----|---|---|----------------------------------------------------------------------------------------|
| <b>WOMAC total score, 8 weeks (0-100, lower scores indicate improvement)</b>   |                      |             |             |                      |      |                     |    |    |   |   |                                                                                        |
| 30<br>(1 RCT)                                                                  | serious <sup>a</sup> | not serious | not serious | serious <sup>b</sup> | none | ⊕⊕○○<br>LOW         | 14 | 16 | - | - | MD <b>15.5 lower</b><br>(24.24 lower to 6.76 lower)<br><br><b>Favors medial insole</b> |
| <b>VAS pain on movement, 8 weeks (0-10, lower scores indicate improvement)</b> |                      |             |             |                      |      |                     |    |    |   |   |                                                                                        |
| 30<br>(1 RCT)                                                                  | serious <sup>a</sup> | not serious | not serious | serious <sup>b</sup> | none | ⊕⊕○○<br>LOW         | 14 | 16 | - | - | MD <b>3.4 lower</b><br>(5.29 lower to 1.51 lower)<br><br><b>Favors medial insole</b>   |

**CI:** Confidence interval; **MD:** Mean difference

### Explanations

a. Non-blinded RCT

b. Small sample size

**Table 3. Medial or lateral insole + usual care versus usual care compared to usual care for knee OA**

| Certainty assessment                                                   |                      |               |              |                      |                  |                               | Summary of findings |                                |                          |                              |                                                      |
|------------------------------------------------------------------------|----------------------|---------------|--------------|----------------------|------------------|-------------------------------|---------------------|--------------------------------|--------------------------|------------------------------|------------------------------------------------------|
| Nº of participants (studies)<br>Follow-up                              | Risk of bias         | Inconsistency | Indirectness | Imprecision          | Publication bias | Overall certainty of evidence | Number of patients  |                                | Relative effect (95% CI) | Anticipated absolute effects |                                                      |
|                                                                        |                      |               |              |                      |                  |                               | With control        | With Medial and lateral insole |                          | Risk with control            | Risk difference with Medial and lateral insole       |
| <b>KOOS pain, 3 months (0-100, higher scores indicate improvement)</b> |                      |               |              |                      |                  |                               |                     |                                |                          |                              |                                                      |
| 33<br>(1 RCT)                                                          | serious <sup>a</sup> | not serious   | not serious  | serious <sup>b</sup> | none             | ⊕⊕○○<br>LOW                   | 18                  | 15                             | -                        | -                            | MD <b>5.6 higher</b><br>(5.13 lower to 16.33 higher) |

CI: Confidence interval; MD: Mean difference

### Explanations

- a. Patients and personnel were not blinded
- b. Wide CI crossing no-effect line

**Table 4. RCT and systematic review data not suitable for RevMan**

| Author, year            | Study type         | Duration | Population Description | Treatment given to relevant population                                                                                                                                          | Results                                                                                    |
|-------------------------|--------------------|----------|------------------------|---------------------------------------------------------------------------------------------------------------------------------------------------------------------------------|--------------------------------------------------------------------------------------------|
| 2886<br>Dessery<br>2016 | Single-blinded RCT |          | Patients with knee OA  | 1) no orthoses; 2) customized foot orthosis made with arch support and without lateral inclination (neutral CFO); 3) 6° laterally wedged insole; 4) 10° laterally wedged insole | Knee pain ratings: No orthoses 23.0, Neutral CFO 21.8, with 6° CFO 20.4, with 10° CFO 24.2 |

|                               |                                     |          |                                                    |                                                                                                                                                    |                                                                                                                                                                                                                                                                                                                                                                                                                                                                                                                                                                                                                                                                                                                                                                                                                                                                                                |
|-------------------------------|-------------------------------------|----------|----------------------------------------------------|----------------------------------------------------------------------------------------------------------------------------------------------------|------------------------------------------------------------------------------------------------------------------------------------------------------------------------------------------------------------------------------------------------------------------------------------------------------------------------------------------------------------------------------------------------------------------------------------------------------------------------------------------------------------------------------------------------------------------------------------------------------------------------------------------------------------------------------------------------------------------------------------------------------------------------------------------------------------------------------------------------------------------------------------------------|
| 5053<br>Campos<br>2015        | single-blind<br>RCT for 24<br>weeks | 24 weeks | 58 patients with<br>knee OA                        | Lateral wedge insole group<br>(W) n=29, Neutral group (N)<br>n=29                                                                                  | WOMAC pain mean change: W -1.1, N -2.0<br>VAS change: W -6.2; N -10.1<br>Lequesne's index change: W -1.5; N -1                                                                                                                                                                                                                                                                                                                                                                                                                                                                                                                                                                                                                                                                                                                                                                                 |
| 5063<br>Maillefert<br>2001    | Non-blinded<br>RCT                  | 6-month  | 156 patients with<br>medial knee<br>osteoarthritis | laterally wedged insoles (LWI)<br>and neutrally wedged insoles<br>(NWI)                                                                            | WOMAC pain change: LWI -0.7 (19.5% of patients<br>with improvement); NWI -5.6 (21.6% of patients with<br>improvement)<br>WOMAC physical functioning change: +4.5, 12.2%<br>with improvement); -2.7 (13.5% with improvement)                                                                                                                                                                                                                                                                                                                                                                                                                                                                                                                                                                                                                                                                    |
| 6718<br>Baker<br>2007         | double-blind<br>RCT                 | 6 weeks  | 90 patients with<br>medial knee<br>osteoarthritis  | lateral-wedge insole or a<br>neutral insole for 6 weeks                                                                                            | The differential carryover was a 1.5-point difference<br>in the WOMAC pain score (P=0.96). The mean<br>difference between the 2 treatments across the time<br>periods was 13.8 points (95% CI -3.9, 31.4) on the<br>500-point WOMAC pain scale. 11 of 86 subjects<br>experienced minimal clinical improvement in the<br>WOMAC pain score (>50 points) after both<br>treatments. 21 patients achieved this level of<br>improvement only with the wedged insole, but 19<br>patients achieved it only with the neutral insole<br>(P=0.75). The lateral-wedge insole improved pain in<br>patients with a K/L grade 4 by 21 points, compared<br>with a 2-point improvement in those with a K/L grade<br>of 4. Those with a BMI of 30 kg/m <sup>2</sup> had a 29-point<br>improvement in pain, compared with a 6-point<br>improvement in those with a BMI>30 kg/m <sup>2</sup> (P=0.06<br>for both). |
| 1363<br>Sattari<br>2011       | single-blinded<br>RCT               | 9 months | 60 patients with<br>knee pain                      | Lateral wedge insoles (n=20)<br>and controls (n=20)                                                                                                | VAS pain change: -3.7 vs -0.6                                                                                                                                                                                                                                                                                                                                                                                                                                                                                                                                                                                                                                                                                                                                                                                                                                                                  |
| 664<br>Duivenvoo<br>rden 2015 | Cochrane<br>review                  |          |                                                    | 1. Lateral wedge insole versus<br>no insole<br>2. Lateral wedge insole versus<br>neutral insole<br>3. Medial wedge insole versus<br>neutral insole | <b>Lateral wedge insole versus no insole:</b><br>1. Pain (VAS) MD (IV, Random, 95% CI) -1.60 [-<br>2.31, -0.89]<br>2. Walking distance (km) MD 0.70 [0.52, 0.88]<br><b>Lateral wedge insole versus neutral insole:</b><br>1. Pain at rest 12 months: -0.4 [-1.06, 0.26]<br>2. Pain on walking 12 months: MD 0.10 [-0.45, 0.65];<br>3. WOMAC pain 12 months: 0.89 [-2.89, 4.67]; 24<br>months 2.80 [-6.12, 11.72];<br>4. WOMAC function 12 months: 0.94 [-2.98, 4.87];<br>24 months -0.40 [-9.47, 8.67];<br>5. Pain VAS 6 months: -11.80 [-22.04, -1.                                                                                                                                                                                                                                                                                                                                           |

|  |  |  |  |  |                                                                                                                                                                                                                                                                                                                                                                                  |
|--|--|--|--|--|----------------------------------------------------------------------------------------------------------------------------------------------------------------------------------------------------------------------------------------------------------------------------------------------------------------------------------------------------------------------------------|
|  |  |  |  |  | 6. 56]; 24 months: -2.0 [-13.34, 9.34]<br>7. Lequesne's index 6 months: -1.5 [-4.23, 1.23]; 24 months: -2.3 [-5.45, 0.85].<br><b>Medial wedge insole versus neutral insole:</b><br>1. VAS rest MD -0.40 [-2.16, 1.36]<br>2. VAS movement MD -2.2 [-4.04, -0.36]<br>3. VAS night MD -1.50 [-3.12, 0.12]<br>4. WOMAC MD -6.70 [-17.09, 3.69]<br>5. Lequesne MD -2.40 [-5.28, 0.48] |
|--|--|--|--|--|----------------------------------------------------------------------------------------------------------------------------------------------------------------------------------------------------------------------------------------------------------------------------------------------------------------------------------------------------------------------------------|

### References:

1. Baker, K., Goggins, J., Xie, H., Szumowski, K., LaValley, M., Hunter, D. J., & Felson, D. T. (2007). A randomized crossover trial of a wedged insole for treatment of knee osteoarthritis. *Arthritis Rheum*, 56(4), 1198-1203. doi:10.1002/art.22516
2. Barrios, J. A., Crenshaw, J. R., Royer, T. D., & Davis, I. S. (2009). Walking shoes and laterally wedged orthoses in the clinical management of medial tibiofemoral osteoarthritis: a one-year prospective controlled trial. *Knee*, 16(2), 136-142. doi:10.1016/j.knee.2008.10.002
3. Brouwer, R. W., Jakma, T. S., Verhagen, A. P., Verhaar, J. A., & Bierma-Zeinstra, S. M. (2005). Braces and orthoses for treating osteoarthritis of the knee. *Cochrane Database Syst Rev*(1), CD004020. doi:10.1002/14651858.CD004020.pub2
4. Campos, G. C., Rezende, M. U., Pasqualin, T., Frucchi, R., & Bolliger Neto, R. (2015). Lateral wedge insole for knee osteoarthritis: randomized clinical trial. *Sao Paulo Med J*, 133(1), 13-19. doi:10.1590/1516-3180.2013.6750002
5. Dessery, Y., Belzile, E., Turmel, S., & Corbeil, P. (2017). Effects of foot orthoses with medial arch support and lateral wedge on knee adduction moment in patients with medial knee osteoarthritis. *Prosthet Orthot Int*, 41(4), 356-363. doi:10.1177/0309364616661254
6. Hatef, M. R., Mirfeizi, Z., Sahebari, M., Jokar, M. H., & Mirheydari, M. (2014). Superiority of laterally elevated wedged insoles to neutrally wedged insoles in medial knee osteoarthritis symptom relief. *Int J Rheum Dis*, 17(1), 84-88. doi:10.1111/1756-185X.12036
7. Kl , A. U. B. B. (2010). Effects of lateral wedge insoles on symptoms and structural disease progression in medial knee osteoarthritis: a 12-month randomised controlled trial. *Osteoarthritis and cartilage.*, 18, S11. doi:10.1016/S1063-4584%2810%2960033-7
8. Lewinson, R. T., Vallerand, I. A., Collins, K. H., Wiley, J. P., Lun, V. M. Y., Patel, C., . . . Stefanyshyn, D. J. (2016). Reduced knee adduction moments for management of knee osteoarthritis:: A three month phase I/II randomized controlled trial. *Gait Posture*, 50, 60-68. doi:10.1016/j.gaitpost.2016.08.027
9. Maillefert, J. F. A. H. (2002). Laterally elevated wedged insoles in the treatment of medial knee osteoarthritis: a prospective randomized controlled study. *Osteoarthritis Cartilage*, 9(8), 738-745. doi:10.1053/joca.2001.0470

10. Rodrigues, P. T. A. F. (2008). Effectiveness of medial-wedge insole treatment for valgus knee osteoarthritis. *Arthritis Rheum*, 59(5), 603-608. doi:10.1002/art.23560
11. Sattari, S., & Ashraf, A. R. (2011). Comparison the effect of 3 point valgus stress knee support and lateral wedge insoles in medial compartment knee osteoarthritis. *Iran Red Crescent Med J*, 13(9), 624-628.
12. Toda, Y., & Tsukimura, N. (2008). Influence of concomitant heeled footwear when wearing a lateral wedged insole for medial compartment osteoarthritis of the knee. *Osteoarthritis Cartilage*, 16(2), 244-253. doi:10.1016/j.joca.2007.06.010

**PICO 104: Modified shoe + gait retraining + usual care vs. Usual care in patients with knee OA**

Summary. This PICO was addressed by 5 RCTs [1-5]. The studies comparing modified shoes to conventional shoes show no significant difference in WOMAC pain, WOMAC function, and the 6 minute walk test, although for the latter outcome the finding was imprecise (Table 1. When comparing before and after WOMAC pain and function scores there was a significant difference with improved pain and function within each group (Table 2).

Quality of evidence across all critical outcomes: Low

| <b>Table 1. Modified shoe compared to conventional shoe for knee OA</b>      |                      |                      |                     |                    |                         |                                      |                               |                           |                                 |                                     |                                                      |
|------------------------------------------------------------------------------|----------------------|----------------------|---------------------|--------------------|-------------------------|--------------------------------------|-------------------------------|---------------------------|---------------------------------|-------------------------------------|------------------------------------------------------|
| <b>Certainty assessment</b>                                                  |                      |                      |                     |                    |                         |                                      | <b>Summary of findings</b>    |                           |                                 |                                     |                                                      |
| <b>Nº of participants (studies) Follow-up</b>                                | <b>Risk of bias</b>  | <b>Inconsistency</b> | <b>Indirectness</b> | <b>Imprecision</b> | <b>Publication bias</b> | <b>Overall certainty of evidence</b> | <b>Number of patients</b>     |                           | <b>Relative effect (95% CI)</b> | <b>Anticipated absolute effects</b> |                                                      |
|                                                                              |                      |                      |                     |                    |                         |                                      | <b>With conventional shoe</b> | <b>With Modified shoe</b> |                                 | <b>Risk with conventional shoe</b>  | <b>Risk difference with Modified shoe</b>            |
| <b>WOMAC Pain (change from baseline) (lower scores indicate improvement)</b> |                      |                      |                     |                    |                         |                                      |                               |                           |                                 |                                     |                                                      |
| 279 (2 RCTs)                                                                 | serious <sup>a</sup> | not serious          | not serious         | not serious        | none                    | ⊕⊕⊕○<br>MODERATE                     | 146                           | 133                       | -                               | -                                   | <b>SMD 0.02 lower</b><br>(0.26 lower to 0.21 higher) |

| <b>Table 1. Modified shoe compared to conventional shoe for knee OA</b>          |                      |             |             |                      |      |                            |     |     |   |   |                                                     |
|----------------------------------------------------------------------------------|----------------------|-------------|-------------|----------------------|------|----------------------------|-----|-----|---|---|-----------------------------------------------------|
| <b>Certainty assessment</b>                                                      |                      |             |             |                      |      | <b>Summary of findings</b> |     |     |   |   |                                                     |
| <b>WOMAC Function (change from baseline) (lower scores indicate improvement)</b> |                      |             |             |                      |      |                            |     |     |   |   |                                                     |
| 279<br>(2 RCTs)                                                                  | serious <sup>a</sup> | not serious | not serious | not serious          | none | ⊕⊕⊕○<br>MODERATE           | 146 | 133 | - | - | SMD <b>0</b><br>(0.23 lower to 0.24 higher)         |
| <b>6 minute walk test (m) (higher scores indicate improvement)</b>               |                      |             |             |                      |      |                            |     |     |   |   |                                                     |
| 56<br>(1 RCT)                                                                    | serious <sup>b</sup> | not serious | not serious | serious <sup>c</sup> | none | ⊕⊕○○<br>LOW                | 28  | 28  | - | - | MD <b>11 higher</b><br>(9.81 lower to 31.81 higher) |

**CI:** Confidence interval; **SMD:** Standardised mean difference; **MD:** Mean difference

## Explanations

- a. One study lacks allocation concealment and blinding
- b. patients not blinded, no mention of allocation concealment
- c. Wide 95% CI Crosses no effect line

**Table 2. RCT data not suitable for effect size calculation or combining with other data**

| Ref ID, Author, year       | Study type | Duration | Population Description                | Treatment given to relevant population                 | Results                                                                                                                                                                                                                                                        |
|----------------------------|------------|----------|---------------------------------------|--------------------------------------------------------|----------------------------------------------------------------------------------------------------------------------------------------------------------------------------------------------------------------------------------------------------------------|
| 5189, Trombini-souza, 2015 | RCT        | 6 Month  | OA Knee<br><br>Women<br><br>60-80 y/o | Modified shoe<br>N=26<br><br>Conventional shoe<br>N=24 | <b>WOMAC pain score (change from baseline)</b><br>Modified shoe = -66.6% (p<0.001)<br>Conventional shoe = -28% (p<0.001)<br><br><b>WOMAC function score (change from baseline)</b><br>Modified shoe = -63.2% (p<0.001)<br>Conventional shoe = -19.4% (p<0.001) |

|                                     |     |          |                                |                                                                        |                                                                                                                                                              |
|-------------------------------------|-----|----------|--------------------------------|------------------------------------------------------------------------|--------------------------------------------------------------------------------------------------------------------------------------------------------------|
| 773,<br>Erhart,<br>2010             | RCT | 6 months | OA Knee<br><br>At least 40 y/o | Variable stiffness shoe<br>N=34<br><br>Constant stiffness shoe<br>N=26 | <b>WOMAC pain (change from baseline)</b><br>Modified shoe = -5.5 from baseline of 14.8<br>P=0.002<br><br>Control shoe = -3.1 from baseline of 16.1<br>P=0.16 |
| 2532,<br>Erhart-<br>Hledik,<br>2012 | RCT | 6 month  | OA knee                        | Variable stiffness shoe<br>N=32<br><br>Constant stiffness shoe<br>N=23 | <b>WOMAC pain (change from baseline)</b><br>Modified shoe = -4.7 from baseline of 15<br>P=0.002<br><br>Control shoe = -4.1 from baseline of 15.4<br>P=0.04   |

## References

1. Trombini-Souza F, Matias AB, Yokota M, Butugan MK, Goldenstein-Schainberg C, Fuller R, et al. Long-term use of minimal footwear on pain, self-reported function, analgesic intake, and joint loading in elderly women with knee osteoarthritis: A randomized controlled trial. *Clin Biomech (Bristol, Avon)*. 2015;30(10):1194-1201.
2. Hinman RS, Wrigley TV, Metcalf BR, Campbell PK, Paterson KL, Hunter DJ, et al. Unloading Shoes for Self-management of Knee Osteoarthritis: A Randomized Trial. *Ann Intern Med*. 2016;165(6):381-389.
3. Nigg BM, Emery C, Hiemstra LA. Unstable shoe construction and reduction of pain in osteoarthritis patients. *Med Sci Sports Exerc*. 2006;38(10):1701-1708.
4. Erhart-Hledik JC, Elspas B, Giori NJ, Andriacchi TP. Effect of variable-stiffness walking shoes on knee adduction moment, pain, and function in subjects with medial compartment knee osteoarthritis after 1 year. *J Orthop Res*. 2012;30(4):514-521.
5. Erhart JC, Mundermann A, Elspas B, Giori NJ, Andriacchi TP. Changes in knee adduction moment, pain, and functionality with a variable-stiffness walking shoe after 6 months. *J Orthop Res*. 2010;28(7):873-879.

## PICO 105: Knee Brace compared to usual care for knee OA

Summary: This PICO question is addressed by 8 non-blinded RCTs<sup>[2-8,10]</sup>, and 2 systematic reviews<sup>[1,9]</sup>. The results across all outcomes (WOMAC pain, KOOS pain, pain on stair climbing, and pain during six-minute walk) favored knee brace treatment over usual care. A literature search update in August 2018 identified one additional relevant RCT<sup>[11]</sup>; the findings of this study were consistent with the findings of the overall evidence base.



Quality of Evidence across outcomes: Moderate

| <b>Table 1. Knee brace compared to usual care for knee OA</b>          |                      |                      |                     |                      |                         |                                      |                            |                        |                                 |                                     |                                                                                        |
|------------------------------------------------------------------------|----------------------|----------------------|---------------------|----------------------|-------------------------|--------------------------------------|----------------------------|------------------------|---------------------------------|-------------------------------------|----------------------------------------------------------------------------------------|
| <b>Certainty assessment</b>                                            |                      |                      |                     |                      |                         |                                      | <b>Summary of findings</b> |                        |                                 |                                     |                                                                                        |
| <b>Nº of participants (studies) Follow-up</b>                          | <b>Risk of bias</b>  | <b>Inconsistency</b> | <b>Indirectness</b> | <b>Imprecision</b>   | <b>Publication bias</b> | <b>Overall certainty of evidence</b> | <b>Number of patients</b>  |                        | <b>Relative effect (95% CI)</b> | <b>Anticipated absolute effects</b> |                                                                                        |
|                                                                        |                      |                      |                     |                      |                         |                                      | <b>With usual care</b>     | <b>With Knee brace</b> |                                 | <b>Risk with usual care</b>         | <b>Risk difference with Knee brace</b>                                                 |
| <b>WOMAC pain, 6 months (0-500, lower scores indicate improvement)</b> |                      |                      |                     |                      |                         |                                      |                            |                        |                                 |                                     |                                                                                        |
| 81 (1 RCT)                                                             | serious <sup>c</sup> | not serious          | not serious         | not serious          | none                    | ⊕⊕⊕○<br>MODERATE                     | 40                         | 41                     | -                               | -                                   | <b>MD 56.3</b><br>lower (88.58 lower to 24.02 lower)<br><br><b>Favors knee brace</b>   |
| <b>KOOS pain (0-100, higher scores indicate improvement)</b>           |                      |                      |                     |                      |                         |                                      |                            |                        |                                 |                                     |                                                                                        |
| 31 (1 RCT)                                                             | serious <sup>a</sup> | not serious          | not serious         | serious <sup>b</sup> | none                    | ⊕⊕○○<br>LOW                          | 15                         | 16                     | -                               | -                                   | <b>MD 8.25</b><br>higher (3.16 higher to 13.34 higher)<br><br><b>Favors knee brace</b> |

**Table 1. Knee brace compared to usual care for knee OA**

| Table 1. Knee brace compared to usual care for knee OA                                          |                      |             |             |             |      |                     |    |    |   |   |                                                                                                   |
|-------------------------------------------------------------------------------------------------|----------------------|-------------|-------------|-------------|------|---------------------|----|----|---|---|---------------------------------------------------------------------------------------------------|
| Certainty assessment                                                                            |                      |             |             |             |      | Summary of findings |    |    |   |   |                                                                                                   |
| <b>Pain after the stair-climbing test, 6 months (0-100, lower scores indicate improvement)</b>  |                      |             |             |             |      |                     |    |    |   |   |                                                                                                   |
| 81<br>(1 RCT)                                                                                   | serious <sup>c</sup> | not serious | not serious | not serious | none | ⊕⊕⊕○<br>MODERATE    | 40 | 41 | - | - | <b>MD 21.49</b><br>lower<br>(33.81<br>lower to<br>9.17 lower)<br><br><b>Favors<br/>knee brace</b> |
| <b>Pain on the six-minute walking test, 6 months (0-100, lower scores indicate improvement)</b> |                      |             |             |             |      |                     |    |    |   |   |                                                                                                   |
| 81<br>(1 RCT)                                                                                   | serious <sup>c</sup> | not serious | not serious | not serious | none | ⊕⊕⊕○<br>MODERATE    | 40 | 41 | - | - | <b>MD 18.9</b><br>lower<br>(29.74<br>lower to<br>8.06 lower)<br><br><b>Favors<br/>knee brace</b>  |

CI: Confidence interval; MD: Mean difference

### Explanations

- a. Allocation concealment and blinding of participants and personnel has not been performed
- b. Small sample size
- c. Blinding of participants and personnel has not been performed

**Table 2. RCT and systematic review data not suitable for RevMan**

| Author, year        | Study type                    | Duration  | Population Description                               | Treatment given to relevant population                                                                                                                             | Results                                                                                                                                                                                                                                                                                                                                                                                                                                                                                                                                      |
|---------------------|-------------------------------|-----------|------------------------------------------------------|--------------------------------------------------------------------------------------------------------------------------------------------------------------------|----------------------------------------------------------------------------------------------------------------------------------------------------------------------------------------------------------------------------------------------------------------------------------------------------------------------------------------------------------------------------------------------------------------------------------------------------------------------------------------------------------------------------------------------|
| 603 Petersen 2016   | SR of 24 articles             |           | Patients with medial osteoarthritis (OA) of the knee | Unloader braces                                                                                                                                                    | Nine studies reported a decrease of pain in braced patients. One study demonstrated significant reductions in WOMAC pain score (20.4%) in the valgus knee brace group. In another study the scores from an analog pain scale decreased 48% with brace wear, and function with activities of daily living increased 79%. In another study, before brace wear, 78 % had pain with activities of daily living, but after the first evaluation, only 39 % continued to have such pain, and at the second evaluation, only 31 % were so affected. |
| 662 Brouwer 2006    | Non-blinded RCT for 12 months | 12 months | 117 patients with OA of the knee                     | Intervention group (n = 60) comprising conservative treatment with additional brace treatment and a control group (n = 57) comprising conservative treatment alone | VAS pain MD at 3 months: - 0.73 (-1.62;0.16) effect size 0.3<br>VAS pain MD at 6 months: - 0.58 (-1.48;0.32) effect size 0.3<br>VAS pain MD at 12 months: - 0.81 (-1.76;0.14), effect size 0.4<br>Overall VAS MD - 0.63 (-1.38;0.12), effect size 0.3                                                                                                                                                                                                                                                                                        |
| 3997, Kapadia, 2016 | Prospective RCT               | 3 month   | OA knee                                              | Pneumatic Brace<br>N=24<br><br>Standard care<br>N=12                                                                                                               | <b>Walking speed</b><br><u>Brace</u><br>Prespeed = 89.16 cm/sec (range: 51-128)<br>Postspeed = 98.5 cm/sec (range: 54 – 157)<br>P=0.0027<br><br><u>Standard care</u><br>Prespeed = 92.5 cm/sec (range: 57-123)<br>Postspeed = 95.5 cm/sec (range: 58 – 107)<br>P=0.47                                                                                                                                                                                                                                                                        |
| 7981, Cherian, 2815 | RCT pilot                     | 3 month   | OA knee                                              | Knee brace<br>N=9<br><br>Standard care<br>N=9                                                                                                                      | <b>VAS (change 0-3 month)</b><br>Brace = 0.63<br>Standard treatment = -0.14<br>P = 0.44<br><br><b>SF-36 physical (change 0-3 month)</b><br>Brace = 2.6<br>Standard treatment = 1.4<br>P = 0.689                                                                                                                                                                                                                                                                                                                                              |

|                           |                    |         |         |                                                    |                                                                                                                                                                                                                                                                                                                                                                                                                                                                                          |
|---------------------------|--------------------|---------|---------|----------------------------------------------------|------------------------------------------------------------------------------------------------------------------------------------------------------------------------------------------------------------------------------------------------------------------------------------------------------------------------------------------------------------------------------------------------------------------------------------------------------------------------------------------|
|                           |                    |         |         |                                                    | <p><b>TUG test (change 0-3 month)</b><br/> Brace = -1 sec<br/> Standard treatment = --0.4 sec<br/> P = 0.614</p> <p><b>Timed stair climb (change 0-3 month)</b><br/> Brace = -3 sec<br/> Standard treatment = -12 sec<br/> P = 0.24</p> <p><b>Chair rise (change 0-3 month)</b><br/> Brace = -1.7 sec<br/> Standard treatment = -5.1 sec<br/> P = 0.141</p> <p><b>Two minute walk (change 0-3 month)</b><br/> Brace = -21.6 feet<br/> Standard treatment = +41.8 feet<br/> P = 0.068</p> |
| 7395,<br>Cherian,<br>2015 | Prospective<br>RCT | 3 month | OA knee | Knee brace<br>N=26<br><br>Matching control<br>N=26 | <p><b>VAS (change 0-3 month)</b><br/> Brace = 1.9; p=0.0075<br/> Standard treatment = -0.1; p=0.77</p> <p><b>SF-36 physical (change 0-3 month)</b><br/> Brace = 2.5; p=0.31<br/> Standard treatment = 6.3; p=0.25</p> <p><b>TUG test (change 0-3 month)</b><br/> Brace = -2.4 sec; p=0.007<br/> Standard treatment = --0.1 sec; p=0.096</p> <p><b>Timed stair climb (change 0-3 month)</b><br/> Brace = -7.8 sec; p=0.0408<br/> Standard treatment = -1.7 sec; p=0.065</p>               |

|  |  |  |  |  |                                                                                                                                                                                                                                                    |
|--|--|--|--|--|----------------------------------------------------------------------------------------------------------------------------------------------------------------------------------------------------------------------------------------------------|
|  |  |  |  |  | <p><b>Chair rise (change 0-3 month)</b><br/> Brace = -1.4 sec; p=0.059<br/> Standard treatment = -1.1 sec; p=0.23</p> <p><b>Two minute walk (change 0-3 month)</b><br/> Brace = +43.3 feet; p=0.019<br/> Standard treatment = -27 feet; p=0.24</p> |
|--|--|--|--|--|----------------------------------------------------------------------------------------------------------------------------------------------------------------------------------------------------------------------------------------------------|

## References:

1. Brouwer, R. W., Jakma, T. S., Verhagen, A. P., Verhaar, J. A., & Bierma-Zeinstra, S. M. (2005). Braces and orthoses for treating osteoarthritis of the knee. *Cochrane Database Syst Rev*(1), CD004020. doi:10.1002/14651858.CD004020.pub2
2. Brouwer, R. W., van Raaij, T. M., Verhaar, J. A., Coene, L. N., & Bierma-Zeinstra, S. M. (2006). Brace treatment for osteoarthritis of the knee: a prospective randomized multi-centre trial. *Osteoarthritis Cartilage*, 14(8), 777-783. doi:10.1016/j.joca.2006.02.004
3. Cherian, J. J., Bhave, A., Kapadia, B. H., Starr, R., McElroy, M. J., & Mont, M. A. (2015). Strength and Functional Improvement Using Pneumatic Brace with Extension Assist for End-Stage Knee Osteoarthritis: A Prospective, Randomized trial. *J Arthroplasty*, 30(5), 747-753. doi:10.1016/j.arth.2014.11.036
4. Kapadia, B. H., Cherian, J. J., Starr, R., Chughtai, M., Mont, M. A., Harwin, S. F., & Bhave, A. (2016). Gait Using Pneumatic Brace for End-Stage Knee Osteoarthritis. *J Knee Surg*, 29(3), 218-223. doi:10.1055/s-0036-1579790
5. Kirkley, A., Webster-Bogaert, S., Litchfield, R., Amendola, A., MacDonald, S., McCalden, R., & Fowler, P. (1999). The effect of bracing on varus gonarthrosis. *J Bone Joint Surg Am*, 81(4), 539-548.
6. Mont, M. A., Cherian, J. J., Bhave, A., Starr, R., Elmallah, R. K., Beaver, W. B., Jr., & Harwin, S. F. (2015). Unloader Bracing for Knee Osteoarthritis: A Pilot Study of Gait and Function. *Surg Technol Int*, 27, 287-293.
7. Moyer, R. F., Birmingham, T. B., Bryant, D. M., Giffin, J. R., Marriott, K. A., & Leitch, K. M. (2015). Biomechanical effects of valgus knee bracing: a systematic review and meta-analysis. *Osteoarthritis Cartilage*, 23(2), 178-188. doi:10.1016/j.joca.2014.11.018
8. Ostrander, R. V., Leddon, C. E., Hackel, J. G., O'Grady, C. P., & Roth, C. A. (2016). Efficacy of Unloader Bracing in Reducing Symptoms of Knee Osteoarthritis. *Am J Orthop (Belle Mead NJ)*, 45(5), 306-311.
9. Petersen, W., Ellermann, A., Zantop, T., Rembitzki, I. V., Semsch, H., Liebau, C., & Best, R. (2016). Biomechanical effect of unloader braces for medial osteoarthritis of the knee: a systematic review (CRD 42015026136). *Arch Orthop Trauma Surg*, 136(5), 649-656. doi:10.1007/s00402-015-2388-2

10. Sattari, S., & Ashraf, A. R. (2011). Comparison the effect of 3 point valgus stress knee support and lateral wedge insoles in medial compartment knee osteoarthritis. Iran Red Crescent Med J, 13(9), 624-628.
11. Thoumie P1, Marty M2,3, Avouac B3, Pallez A4, Vaumousse A5, Pipet LPT6, et al. Effect of unloading brace treatment on pain and function in patients with symptomatic knee osteoarthritis: the ROTOR randomized clinical trial. Sci Rep. 2018 Jul 12;8(1): 10519. doi: 10.1038/s41598-018-28782-3.

**PICO 106: PF brace + usual care compared to Usual care in knee OA**

Summary. This PICO was addressed by 2 RCTs <sup>[1,2]</sup>. One study found a small but statistically significant improvement in KOOS pain and function for users of a PF brace compared to those who did not use a brace<sup>[1]</sup>. In contrast, the second study found no significant between-group difference in pain, function or side effects for use of an active PF brace versus an inactive PF brace (with realigning strap removed).

Quality of evidence across all critical outcomes: Low

| <b>PF Brace compared to No Brace for knee OA</b>             |                      |                      |                     |                      |                         |                                      |                            |                   |                                 |                                     |                                                                                        |
|--------------------------------------------------------------|----------------------|----------------------|---------------------|----------------------|-------------------------|--------------------------------------|----------------------------|-------------------|---------------------------------|-------------------------------------|----------------------------------------------------------------------------------------|
| <b>Certainty assessment</b>                                  |                      |                      |                     |                      |                         |                                      | <b>Summary of findings</b> |                   |                                 |                                     |                                                                                        |
| <b>Nº of participants (studies) Follow-up</b>                | <b>Risk of bias</b>  | <b>Inconsistency</b> | <b>Indirectness</b> | <b>Imprecision</b>   | <b>Publication bias</b> | <b>Overall certainty of evidence</b> | <b>Number of Patients</b>  |                   | <b>Relative effect (95% CI)</b> | <b>Anticipated absolute effects</b> |                                                                                        |
|                                                              |                      |                      |                     |                      |                         |                                      | <b>With No Brace</b>       | <b>With Brace</b> |                                 | <b>Risk with No Brace</b>           | <b>Risk difference with Brace</b>                                                      |
| <b>KOOS Pain (0-100, higher scores indicate improvement)</b> |                      |                      |                     |                      |                         |                                      |                            |                   |                                 |                                     |                                                                                        |
| 126 (1 RCT)                                                  | serious <sup>a</sup> | not serious          | not serious         | serious <sup>b</sup> | none                    | ⊕⊕○○<br>LOW                          | 124                        | 120               | -                               | -                                   | MD <b>5.70 higher</b><br>(0.68 higher to 10.72 higher)<br><br><b>Favors knee brace</b> |
| <b>KOOS ADL (0-100, higher scores indicate improvement)</b>  |                      |                      |                     |                      |                         |                                      |                            |                   |                                 |                                     |                                                                                        |

| PF Brace compared to No Brace for knee OA |                      |             |             |                      |      |             |                     |    |   |   |                                                                                      |
|-------------------------------------------|----------------------|-------------|-------------|----------------------|------|-------------|---------------------|----|---|---|--------------------------------------------------------------------------------------|
| Certainty assessment                      |                      |             |             |                      |      |             | Summary of findings |    |   |   |                                                                                      |
| 126<br>(1 RCT)                            | serious <sup>a</sup> | not serious | not serious | serious <sup>b</sup> | none | ⊕⊕○○<br>LOW | 63                  | 63 | - | - | MD <b>4.5 higher</b><br>(0.55 higher to 8.45 higher)<br><br><b>Favors knee brace</b> |

CI: Confidence interval; MD: Mean difference

## Explanations

- Blinding of patients and providers not possible, blinding of outcome assessors possible but not reported
- Single study with wide 95% CI.

Table 2. RCT data not suitable for RevMan

| Author, year           | Study type                 | Duration                                                                   | Population Description                                 | Treatment given to relevant population                                                                                                                                                    | Results                                                                                                                                                                                                                                                                                                              |
|------------------------|----------------------------|----------------------------------------------------------------------------|--------------------------------------------------------|-------------------------------------------------------------------------------------------------------------------------------------------------------------------------------------------|----------------------------------------------------------------------------------------------------------------------------------------------------------------------------------------------------------------------------------------------------------------------------------------------------------------------|
| 6751<br>Hunter<br>2011 | Randomized crossover trial | 6 weeks for each treatment period, with a 6 week washout period in-between | 80 patients with symptomatic lateral patellofemoral OA | Realigning BioSkin Q brace for 6 weeks vs. Bioskin Q brace with realigning strap removed for 6 weeks (treatment order was randomized; all patients received both treatments sequentially) | <p>VAS pain 0-10 (primary outcome):<br/>MD -0.68 (95% CI -6.20 to 4.84), p=0.8055</p> <p>WOMAC pain 0-20:<br/>MD 0.11 (95% CI -0.66 to 0.88), p=0.7744</p> <p>WOMAC function 0-68:<br/>MD -0.02 (95% CI -2.83 to 2.79), p=0.9878</p> <p>Side effects were minor and did not differ significantly between groups.</p> |

## References

- Callaghan MJ, Parkes MJ, Hutchinson CE, Gait AD, Forsythe LM, Marjanovic EJ, et al. A randomised trial of a brace for patellofemoral osteoarthritis targeting knee pain and bone marrow lesions. *Ann Rheum Dis*. 2015;74(6):1164-1170.
- Hunter DJ, Harvey W, Gross KD, Felson D, McCree P, Li L, Hirko K, et al. A randomized trial of patellofemoral bracing for treatment of patellofemoral osteoarthritis. *Osteoarth Cart* 2011;19:792-800.

**PICO 107: Kinesiotaping compared to control for Knee OA**

Summary: The literature search identified six randomized controlled trials that addressed this PICO question (Anandkumar et al, Aydogdu et al, Cho et al, Cushnaghan et al, Hinman et al, Wageck et al).<sup>[1-6]</sup> The RCTs varied markedly in the design of the intervention and control. Interventions included U shaped, Y-shaped, horizontal, medial vertical, 3-layer tape applications, and controls included no-tension taping, horizontal taping across the quadriceps femoris, neutral taping, no taping. Study protocols also varied widely (five studies used a single-blind or non-blinded design, two used cross-over designs and three reported same-day outcome assessments). Pain by visual analog scale (VAS) was the most commonly reported pain outcome (Anandkumar et al, Aydogdu et al, Cho et al, Cushnaghan et al, Hinman et al). Three studies favored intervention (Cho et al, Cushnaghan et al, Hinman et al), and two studies reported no difference in VAS with kinesiotape application vs control (Aydogdu et al, Anandkumar et al). Additionally, two studies measured pressure pain threshold (Cho et al, Wageck et al), one favored intervention (Cho et al), and the other found no difference between intervention and control.

Function outcomes varied widely between studies, and included the WOMAC total score (Wageck et al), KOOS symptoms subscale (Aydogdu et al), and pain-free range of motion (Cho et al). All but one study reported no difference in function between intervention and control, however, Cho et al reported better pain-free range of motion in a single blind study of 46 knee OA patients with Y-shaped taping vs no-tension sham taping. Given wide heterogeneity of studies, the evidence for use of kinesiotaping for knee osteoarthritis remains unclear, as does the preferred tape application method.

A recent meta-analysis<sup>[7]</sup> including 10 RCTs reported significant benefits for therapeutic taping over control taping for pain and function improvement, but subgroup analyses suggested that the benefit was primarily associated with non-elastic leukotaping. None of the subgroup analyses showed statistically significant benefits for elastic kinesiotaping (Table 2). However, this was primarily due to one study with an effect size in the opposite direction to the effect size in other kinesiotaping studies.

A literature search update in August 2018 identified 2 additional relevant RCTs<sup>[8,9]</sup>. The findings of these studies did not alter the findings of the overall evidence base.

Quality of evidence across all critical outcomes: Low

| <b>Kinesiotape application to the knee compared to control for Knee OA</b> |  |                      |                     |                    |                         |                            |                           |                        |                                     |
|----------------------------------------------------------------------------|--|----------------------|---------------------|--------------------|-------------------------|----------------------------|---------------------------|------------------------|-------------------------------------|
| <b>Certainty assessment</b>                                                |  |                      |                     |                    |                         | <b>Summary of findings</b> |                           |                        |                                     |
| <b>No of participants</b>                                                  |  | <b>Inconsistency</b> | <b>Indirectness</b> | <b>Imprecision</b> | <b>Publication bias</b> | <b>Overall certainty</b>   | <b>Number of patients</b> | <b>Relative effect</b> | <b>Anticipated absolute effects</b> |
|                                                                            |  |                      |                     |                    |                         |                            |                           |                        |                                     |



## Kinesiotape application to the knee compared to control for Knee OA

| Kinesiotape application to the knee compared to control for Knee OA    |                      |                      |             |                      |      |                  |                     |                                                   |             |                         |                                                                              |
|------------------------------------------------------------------------|----------------------|----------------------|-------------|----------------------|------|------------------|---------------------|---------------------------------------------------|-------------|-------------------------|------------------------------------------------------------------------------|
| Certainty assessment                                                   |                      |                      |             |                      |      |                  | Summary of findings |                                                   |             |                         |                                                                              |
| (studies)<br>Follow-up                                                 | Risk<br>of<br>bias   |                      |             |                      |      | of<br>evidence   | With<br>control     | With<br>Kinesiotape<br>application<br>to the knee | (95%<br>CI) | Risk<br>with<br>control | Risk<br>difference<br>with<br>Kinesiotape<br>application<br>to the knee      |
| <b>Pain by VAS (cm) (0-10, lower scores indicate improvement)</b>      |                      |                      |             |                      |      |                  |                     |                                                   |             |                         |                                                                              |
| 140<br>(3 RCTs)                                                        | serious <sup>a</sup> | serious <sup>b</sup> | not serious | not serious          | none | ⊕⊕○○<br>LOW      | 71                  | 69                                                | -           | -                       | MD <b>1.33 lower</b><br>(1.65 lower to 1.01 lower)<br><br><b>Favors tape</b> |
| <b>Pressure pain threshold</b>                                         |                      |                      |             |                      |      |                  |                     |                                                   |             |                         |                                                                              |
| 118<br>(2 RCTs)                                                        | serious <sup>a</sup> | serious <sup>c</sup> | not serious | serious <sup>d</sup> | none | ⊕○○○<br>VERY LOW | 59                  | 59                                                | -           | -                       | MD <b>0.90 higher</b><br>(0.37 lower to 2.17 higher)                         |
| <b>WOMAC total score (0-100, lower scores indicate improvement)</b>    |                      |                      |             |                      |      |                  |                     |                                                   |             |                         |                                                                              |
| 72<br>(1 RCT)                                                          | serious <sup>a</sup> | not serious          | not serious | not serious          | none | ⊕⊕⊕○<br>MODERATE | 36                  | 36                                                | -           | -                       | MD <b>2 lower</b><br>(10.11 lower to 6.11 higher)                            |
| <b>KOOS symptoms score (0-100, higher scores indicate improvement)</b> |                      |                      |             |                      |      |                  |                     |                                                   |             |                         |                                                                              |

| Kinesiotape application to the knee compared to control for Knee OA   |                      |             |             |                      |      |                  |                     |    |   |   |                                                                               |
|-----------------------------------------------------------------------|----------------------|-------------|-------------|----------------------|------|------------------|---------------------|----|---|---|-------------------------------------------------------------------------------|
| Certainty assessment                                                  |                      |             |             |                      |      |                  | Summary of findings |    |   |   |                                                                               |
| 54<br>(1 RCT)                                                         | serious <sup>a</sup> | not serious | not serious | serious <sup>d</sup> | none | ⊕⊕○○<br>LOW      | 28                  | 26 | - | - | MD <b>2.91 lower</b><br>(9.92 lower to 4.1 higher)                            |
| <b>Pain-free range of motion (higher scores indicate improvement)</b> |                      |             |             |                      |      |                  |                     |    |   |   |                                                                               |
| 46<br>(1 RCT)                                                         | serious <sup>a</sup> | not serious | not serious | not serious          | none | ⊕⊕⊕○<br>MODERATE | 23                  | 23 | - | - | MD <b>19.4 higher</b><br>(13.45 higher to 25.35 higher)<br><b>Favors tape</b> |

CI: Confidence interval; MD: Mean difference

## Explanations

- a. Participants not blinded
- b. Different tape applications studied, two studies with null result, one favoring intervention
- c. One study with null results, one favoring intervention
- d. Wide confidence interval crossing no-effect line

**Table 2. RCT or systematic review data not suitable for effect size calculation or combining with other data**

| Ref ID, Author, year | Study type | Duration | Population Description | Treatment given to relevant population | Results |
|----------------------|------------|----------|------------------------|----------------------------------------|---------|
|                      |            |          |                        |                                        |         |

|                                 |                                                                                              |                                                  |                                                   |                                                                                                                                                                                                                                                                    |                                                                                                                                                                                                                                                                                                                                                                                                                                                                                                                                                                                                                                       |
|---------------------------------|----------------------------------------------------------------------------------------------|--------------------------------------------------|---------------------------------------------------|--------------------------------------------------------------------------------------------------------------------------------------------------------------------------------------------------------------------------------------------------------------------|---------------------------------------------------------------------------------------------------------------------------------------------------------------------------------------------------------------------------------------------------------------------------------------------------------------------------------------------------------------------------------------------------------------------------------------------------------------------------------------------------------------------------------------------------------------------------------------------------------------------------------------|
| Ref 5673<br>Ouyang<br>2018      | Systematic<br>review (10<br>RCTs)                                                            | 30<br>minutes to<br>1 month<br>across<br>studies | 10 RCTs including<br>359 patients with<br>knee OA | Leukotaping (non-elastic) vs control in 5<br>studies<br>Kinesiotaping (elastic) vs control in 5<br>studies                                                                                                                                                         | VAS 0-100 pain relief (9 studies)<br>MD 12.8 mm (95% CI 6.66 to 18.89 mm);<br>SMD 1.15 (95% CI 0.48 to 1.80), favors therapeutic taping.<br><br>Kinesiotaping only (4 studies)<br>MD 12.1 mm (95% CI -0.39 to 24.51 mm, p=0.06<br><br>Leukotaping only (5 studies)<br>MD 11,6 mm (95% CI 8.22 to 15.07 mm), favors leukotaping<br><br>Stepping and climbing stairs (4 studies)<br>Leukotaping (2 studies): SMD 0.82 (95% CI 0.40 to 1.24), favors<br>leukotaping.<br><br>Kinesiotaping (2 studies): SMD 1.34 (95% CI -2.08 to 4.77,<br>p=0.44<br><br>Walking (2 studies)<br>SMD 0.77 (95% CI 0.34 to 1.20), favors therapeutic taping |
| Ref 7581<br>Cushnagh<br>an 1994 | single-blind<br>cross-over<br>RCT                                                            | 4 days                                           | 14 Patients with<br>knee OA                       | Horizontal taping medial and superior of<br>the patella vs neutral taping, 4 days of<br>daily application                                                                                                                                                          | Mean difference in pain at day 4 on a 10-point VAS, neutral tape<br>application vs medial application: 1.55, 95%CI (0.24-2.86)                                                                                                                                                                                                                                                                                                                                                                                                                                                                                                        |
| Ref 4354<br>Hinman<br>2003      | Within-<br>subject<br>design,<br>randomized<br>to order of<br>different tape<br>applications | Same day                                         | 18 subjects with<br>knee OA, mean<br>age 66.9 yo  | Two pieces of rigid tape applied a<br>medial patellar glide and corrected<br>lateral and AP tilt. Two<br>further pieces of tape applied distal to<br>the patella unloaded the<br>infrapatellar fat pad, vs no taping, and<br>no-tension taping in the same locatio | Mean difference in pain on pain when walking, 10-point VAS, no-<br>tension tape application vs experimental application: 1.28,<br>95%CI (0.58–1.98)                                                                                                                                                                                                                                                                                                                                                                                                                                                                                   |

## References:

1. Anandkumar, S., et al. (2014). Efficacy of kinesio taping on isokinetic quadriceps torque in knee osteoarthritis: a double blinded randomized controlled study. *Physiother Theory Pract* 30(6): 375-383.
2. Aydogdu, O., et al. (2017). Clinical outcomes of kinesio taping applied in patients with knee osteoarthritis: A randomized controlled trial. *J Back Musculoskelet Rehabil* 30(5): 1045-1051.

3. Cho, H. Y., et al. (2015). Kinesio taping improves pain, range of motion, and proprioception in older patients with knee osteoarthritis: a randomized controlled trial. *Am J Phys Med Rehabil* 94(3): 192-200.
4. Cushnaghan, J., et al. (1994). Taping the patella medially: a new treatment for osteoarthritis of the knee joint? *BMJ* 308(6931): 753-755.
5. Hinman, R. S., et al. (2003). Immediate effects of adhesive tape on pain and disability in individuals with knee osteoarthritis. *Rheumatology (Oxford)* 42(7): 865-869.
6. Wageck, B., et al. (2016). Kinesio Taping does not improve the symptoms or function of older people with knee osteoarthritis: a randomised trial. *J Physiother* 62(3): 153-158.
7. Ouyang, J., et al. (2018). Non-elastic taping, but not elastic taping, provides benefits for patients with knee osteoarthritis: systemic review and meta-analysis. *Clin Rehab* 32(1): 3-17.
8. Hayati, M., et al. (2018). Comparison of non-steroidal anti-inflammatory drugs and knee kinesio taping in early osteoarthritis pain: A randomized controlled trial. *J Body Move Ther*, article in press.
9. Park, K., et al. (2018). Effects of knee taping during functional activities in older people with knee osteoarthritis: A randomized controlled clinical trial. *Geriatr Gerontol Int*. 2018;18(8):1206-1210.

**PICO 108. Ultrasound-guided hyaluronic acid injection compared to anatomic/landmark-guided hyaluronic acid injection in patients with knee or hip OA**

Summary. The literature searches did not identify any studies that addressed this question.

Quality of evidence across all critical outcomes: Very low

**PICO 109. Ultrasound-guided corticosteroid injection compared to anatomic/landmark-guided corticosteroid injection in patients with knee or hip OA**

Summary. The literature searches identified two RCTs that addressed this question in patients with knee OA. One RCT<sup>[1]</sup> directly compared ultrasound-guided CS injection to anatomic-guided CS injection in 92 patients with knee OA. It found significantly lower VAS pain scores in the ultrasound group compared to the anatomic group at 2 weeks post-injection, and significantly reduced pain during injection in the ultrasound group. At 6 months the effects of CS had worn off and VAS pain was equal in both groups (Table 1). The second RCT was indirect in both the patient population (more patients had RA than OA) and the intervention (arthrocentesis followed by CS injection). This trial also found greater VAS pain reduction in the ultrasound group at 2 weeks and significantly reduced pain during the procedure (Table 2). Our searches did not identify any studies comparing ultrasound-guided CS injection to anatomic-guided CS injection in patients with hip OA.

Quality of evidence across all critical outcomes: Low (for direct evidence for knee OA)

| <b>Table 1. US-guided CS injection versus Anatomic-guided CS Injection for Knee OA</b> |                      |                      |                     |                      |                         |                                      |                                       |                                 |                                 |                                     |                                                   |
|----------------------------------------------------------------------------------------|----------------------|----------------------|---------------------|----------------------|-------------------------|--------------------------------------|---------------------------------------|---------------------------------|---------------------------------|-------------------------------------|---------------------------------------------------|
| <b>Certainty assessment</b>                                                            |                      |                      |                     |                      |                         |                                      | <b>Summary of findings</b>            |                                 |                                 |                                     |                                                   |
| <b>Nº of participants (studies) Follow-up</b>                                          | <b>Risk of bias</b>  | <b>Inconsistency</b> | <b>Indirectness</b> | <b>Imprecision</b>   | <b>Publication bias</b> | <b>Overall certainty of evidence</b> | <b>Number of patients</b>             |                                 | <b>Relative effect (95% CI)</b> | <b>Anticipated absolute effects</b> |                                                   |
|                                                                                        |                      |                      |                     |                      |                         |                                      | <b>With anatomic-guided injection</b> | <b>With US-guided injection</b> |                                 | <b>Risk with control</b>            | <b>Risk difference with US-guided injection</b>   |
| <b>VAS pain score (0-10, lower scores indicate improvement) at 2 weeks</b>             |                      |                      |                     |                      |                         |                                      |                                       |                                 |                                 |                                     |                                                   |
| 92 (1 RCT)                                                                             | serious <sup>a</sup> | not serious          | not serious         | serious <sup>b</sup> | none                    | ⊕⊕○○<br>LOW                          | 46                                    | 46                              | -                               | -                                   | MD <b>1 lower</b><br>(1.86 lower to 0.14 lower)   |
| <b>VAS pain score (0-10, lower scores indicate improvement) at 6 months</b>            |                      |                      |                     |                      |                         |                                      |                                       |                                 |                                 |                                     |                                                   |
| 92 (1 RCT)                                                                             | serious <sup>a</sup> | not serious          | not serious         | serious <sup>b</sup> | none                    | ⊕⊕○○<br>LOW                          | 46                                    | 46                              | -                               | -                                   | MD <b>0</b><br>(1.13 lower to 1.13 higher)        |
| <b>VAS pain score (0-10, lower scores indicate improvement) during injection</b>       |                      |                      |                     |                      |                         |                                      |                                       |                                 |                                 |                                     |                                                   |
| 92 (1 RCT)                                                                             | serious <sup>a</sup> | not serious          | not serious         | serious <sup>b</sup> | none                    | ⊕⊕○○<br>LOW                          | 46                                    | 46                              | -                               | -                                   | MD <b>2.1 lower</b><br>(2.92 lower to 1.28 lower) |

**CI:** Confidence interval; **MD:** Mean difference

### Explanations

a. patients not blinded, randomization method and allocation concealment not reported

b. Single study with wide 95% CI

| <b>Table 2. US-guided Arthrocentesis plus CS injection versus Anatomic-guided Arthrocentesis plus CS Injection for Knee OA</b> |                      |                      |                      |                      |                         |                                      |                                       |                                 |                                 |                                     |                                                   |
|--------------------------------------------------------------------------------------------------------------------------------|----------------------|----------------------|----------------------|----------------------|-------------------------|--------------------------------------|---------------------------------------|---------------------------------|---------------------------------|-------------------------------------|---------------------------------------------------|
| <b>Certainty assessment</b>                                                                                                    |                      |                      |                      |                      |                         |                                      | <b>Summary of findings</b>            |                                 |                                 |                                     |                                                   |
| <b>Nº of participants (studies) Follow-up</b>                                                                                  | <b>Risk of bias</b>  | <b>Inconsistency</b> | <b>Indirectness</b>  | <b>Imprecision</b>   | <b>Publication bias</b> | <b>Overall certainty of evidence</b> | <b>Number of patients</b>             |                                 | <b>Relative effect (95% CI)</b> | <b>Anticipated absolute effects</b> |                                                   |
|                                                                                                                                |                      |                      |                      |                      |                         |                                      | <b>With anatomic-guided injection</b> | <b>With US-guided injection</b> |                                 | <b>Risk with control</b>            | <b>Risk difference with US-guided injection</b>   |
| <b>VAS pain score (0-10, lower scores indicate improvement) at 2 weeks</b>                                                     |                      |                      |                      |                      |                         |                                      |                                       |                                 |                                 |                                     |                                                   |
| 64 (1 RCT)                                                                                                                     | serious <sup>a</sup> | not serious          | serious <sup>b</sup> | serious <sup>c</sup> | none                    | ⊕○○○<br>VERY LOW                     | 22                                    | 42                              | -                               | -                                   | MD <b>1.3 lower</b><br>(2.46 lower to 0.14 lower) |
| <b>VAS pain score (0-10, lower scores indicate improvement) during injection</b>                                               |                      |                      |                      |                      |                         |                                      |                                       |                                 |                                 |                                     |                                                   |
| 64 (1 RCT)                                                                                                                     | serious <sup>a</sup> | not serious          | serious <sup>b</sup> | serious <sup>c</sup> | none                    | ⊕○○○<br>VERY LOW                     | 22                                    | 42                              | -                               | -                                   | MD <b>2.8 lower</b><br>(4.31 lower to 1.29 lower) |

CI: Confidence interval; MD: Mean difference

### Explanations

- a. Patients not blinded, randomization method and allocation concealment not reported
- b. Two-thirds of patients had RA, not OA, and arthrocentesis was used prior to CS injection.
- c. Single study with wide 95% CI

## References

1. Sibbitt WL Jr, Band PA, Kettwich LG, Chavez-Chiang NR, Delea SL, Bankhurst AD. A randomized controlled trial evaluating the cost-effectiveness of sonographic guidance for intra-articular injection of the osteoarthritic knee. *J Clin Rheumatol*. 2011;17(8):409-15.
2. Sibbitt WL Jr1, Kettwich LG, Band PA, Chavez-Chiang NR, DeLea SL, Haseler LJ, Bankhurst AD. Does ultrasound guidance improve the outcomes of arthrocentesis and corticosteroid injection of the knee? *Scand J Rheumatol*. 2012 Feb;41(1):66-72.

### PICO 110: Pulsed electrical stimulation compared to control for Knee OA

Summary: The literature search identified four RCTs that addressed this PICO question (Fary et al, Gundog et al, Garland et al, Zizic et al)<sup>[1-4]</sup>. All RCTs provided direct evidence by comparing pulsed electrical therapy to sham interventions. Three of the four RCTs favored pulsed electrical stimulation over control for pain (Gundog et al, Garland et al, Zizic et al), and one favored control (Fary et al). Three of the four RCTs favored pulsed electrical stimulation over control for function (Gundog et al, Garland et al, Zizic et al), and one showed a null result (Fary et al). The study by Gundog et al. that showed the most precise effect on both pain and function favoring pulsed electrical stimulation was rather different from the rest of the studies. This was a single blinded study that evaluated interferential current therapy vs sham applied for 20 minutes per session 5 days a week for 3 weeks. All other studies were double-blind RCTs and evaluated pulsed electrical stimulation vs sham applied for 6-7 hrs a day for 4-26 weeks. Meta-analysis of 3 of these RCTs found no significant between-group difference for WOMAC pain and function, but the findings were inconclusive due to serious inconsistency and serious imprecision in summary effect estimates.

Quality of evidence across all critical outcomes: Very low

| <b>Pulsed electrical stimulation compared to control for Knee OA</b> |                     |                      |                     |                    |                         |                                      |                            |                                           |                                 |                                     |                                                           |
|----------------------------------------------------------------------|---------------------|----------------------|---------------------|--------------------|-------------------------|--------------------------------------|----------------------------|-------------------------------------------|---------------------------------|-------------------------------------|-----------------------------------------------------------|
| <b>Certainty assessment</b>                                          |                     |                      |                     |                    |                         |                                      | <b>Summary of findings</b> |                                           |                                 |                                     |                                                           |
| <b>Nº of participants (studies)<br/>Follow-up</b>                    | <b>Risk of bias</b> | <b>Inconsistency</b> | <b>Indirectness</b> | <b>Imprecision</b> | <b>Publication bias</b> | <b>Overall certainty of evidence</b> | <b>Number of patients</b>  |                                           | <b>Relative effect (95% CI)</b> | <b>Anticipated absolute effects</b> |                                                           |
|                                                                      |                     |                      |                     |                    |                         |                                      | <b>With control</b>        | <b>With pulsed electrical stimulation</b> |                                 | <b>Risk with control</b>            | <b>Risk difference with pulsed electrical stimulation</b> |
| <b>WOMAC pain score (lower scores indicate improvement)</b>          |                     |                      |                     |                    |                         |                                      |                            |                                           |                                 |                                     |                                                           |

| <b>Pulsed electrical stimulation compared to control for Knee OA</b> |                      |                      |             |                      |      |                      |                            |    |   |   |                                                      |
|----------------------------------------------------------------------|----------------------|----------------------|-------------|----------------------|------|----------------------|----------------------------|----|---|---|------------------------------------------------------|
| <b>Certainty assessment</b>                                          |                      |                      |             |                      |      |                      | <b>Summary of findings</b> |    |   |   |                                                      |
| 158<br>(3 RCTs)                                                      | serious <sup>a</sup> | serious <sup>b</sup> | not serious | serious <sup>c</sup> | none | ⊕○○<br>○<br>VERY LOW | 70                         | 88 | - | - | SMD <b>1.02 lower</b><br>(2.47 lower to 0.44 higher) |
| <b>WOMAC function score (lower scores indicate improvement)</b>      |                      |                      |             |                      |      |                      |                            |    |   |   |                                                      |
| 158<br>(3 RCTs)                                                      | serious <sup>a</sup> | serious <sup>d</sup> | not serious | serious <sup>c</sup> | none | ⊕○○<br>○<br>VERY LOW | 70                         | 88 | - | - | SMD <b>1.36 lower</b><br>(2.97 lower to 0.25 higher) |

**CI:** Confidence interval; **MD:** Mean difference

## Explanations

- a. One of the three contributing trials was not blinded
- b. Two studies (including one non-blinded) favor intervention, and one blinded study favors control
- c. CIs cross the no effect line for both blinded studies
- d. Two studies (including one non-blinded) favor intervention, and one blinded study has a null result

**Table 2. RCT data not suitable for effect size calculation or combining with other data**

| Ref ID,<br>Author, year | Study<br>type | Duration | Population<br>Description | Treatment given to relevant<br>population | Results |
|-------------------------|---------------|----------|---------------------------|-------------------------------------------|---------|
|                         |               |          |                           |                                           |         |



|                  |                  |         |                          |                                                              |                                                                                                                                                                                                                                                                                                                      |
|------------------|------------------|---------|--------------------------|--------------------------------------------------------------|----------------------------------------------------------------------------------------------------------------------------------------------------------------------------------------------------------------------------------------------------------------------------------------------------------------------|
| 7892 Zizic, 1995 | double-blind RCT | 4 weeks | 78 patients with knee OA | Pulsed electrical stimulation vs sham, 6 hrs/day for 4 weeks | % difference in patient assessment of pain (not otherwise described):<br>Intervention group: 31.3% (N = 38); Control group: 19.01% (N = 33), p 0.04<br><br>% difference in patient assessment of function (not otherwise described):<br>Intervention group: 30.25% (N = 38); Control group: 19.42% (N = 33), p 0.045 |
|------------------|------------------|---------|--------------------------|--------------------------------------------------------------|----------------------------------------------------------------------------------------------------------------------------------------------------------------------------------------------------------------------------------------------------------------------------------------------------------------------|

### References

1. Fary, R. E., et al. (2011). "The effectiveness of pulsed electrical stimulation in the management of osteoarthritis of the knee: results of a double-blind, randomized, placebo-controlled, repeated-measures trial." *Arthritis Rheum* 63(5): 1333-1342.
2. Garland, D., et al. (2007). "A 3-month, randomized, double-blind, placebo-controlled study to evaluate the safety and efficacy of a highly optimized, capacitively coupled, pulsed electrical stimulator in patients with osteoarthritis of the knee." *Osteoarthritis Cartilage* 15(6): 630-637.
3. Gundog, M., et al. (2012). "Interferential current therapy in patients with knee osteoarthritis: comparison of the effectiveness of different amplitude-modulated frequencies." *Am J Phys Med Rehabil* 91(2): 107-113.
4. Zizic, T. M., et al. (1995). "The treatment of osteoarthritis of the knee with pulsed electrical stimulation." *J Rheumatol* 22(9): 1757-1761.

## Hand Osteoarthritis

### PICO 1. Oral NSAIDs compared to no treatment in patients with hand OA

Summary. The literature searches identified one relevant double-blind RCT that addressed this question. The study compared lumiracoxib (200 or 400 mg daily) to placebo in patients with symptomatic hand OA. At 4 weeks, lumiracoxib (both dosages) showed significant benefit over placebo for improvement of VAS pain and AUSCAN pain. For AUSCAN function scores, only the 400 mg dose led to a significant improvement compared to placebo.

Quality of evidence across all critical outcomes: Moderate

| <b>NSAIDs (200 mg) compared to placebo for Hand OA for Hand OA</b> |                      |                      |                     |                    |                         |                                      |                                 |                             |                                 |                                      |                                                    |
|--------------------------------------------------------------------|----------------------|----------------------|---------------------|--------------------|-------------------------|--------------------------------------|---------------------------------|-----------------------------|---------------------------------|--------------------------------------|----------------------------------------------------|
| <b>Certainty assessment</b>                                        |                      |                      |                     |                    |                         |                                      | <b>Summary of findings</b>      |                             |                                 |                                      |                                                    |
| <b>Nº of participants (studies) Follow-up</b>                      | <b>Risk of bias</b>  | <b>Inconsistency</b> | <b>Indirectness</b> | <b>Imprecision</b> | <b>Publication bias</b> | <b>Overall certainty of evidence</b> | <b>Study event rates (%)</b>    |                             | <b>Relative effect (95% CI)</b> | <b>Anticipated absolute effects</b>  |                                                    |
|                                                                    |                      |                      |                     |                    |                         |                                      | <b>With placebo for Hand OA</b> | <b>With NSAIDs (200 mg)</b> |                                 | <b>Risk with placebo for Hand OA</b> | <b>Risk difference with NSAIDs (200 mg)</b>        |
| <b>VAS pain (0-100, change from baseline to 4 weeks)</b>           |                      |                      |                     |                    |                         |                                      |                                 |                             |                                 |                                      |                                                    |
| 401 (1 RCT)                                                        | serious <sup>a</sup> | not serious          | not serious         | not serious        | none                    | ⊕⊕⊕○<br>MODERATE                     | 196                             | 205                         | -                               | -                                    | MD <b>8.7 lower</b><br>(12.93 lower to 4.47 lower) |
| <b>AUSCAN pain (0-20, change from baseline to 4 weeks)</b>         |                      |                      |                     |                    |                         |                                      |                                 |                             |                                 |                                      |                                                    |
| 401 (1 RCT)                                                        | serious <sup>a</sup> | not serious          | not serious         | not serious        | none                    | ⊕⊕⊕○<br>MODERATE                     | 196                             | 205                         | -                               | -                                    | MD <b>0.9 lower</b><br>(1.71 lower to 0.09 lower)  |

| NSAIDs (200 mg) compared to placebo for Hand OA for Hand OA |                      |             |             |             |      |                  |                     |     |   |   |                                                  |
|-------------------------------------------------------------|----------------------|-------------|-------------|-------------|------|------------------|---------------------|-----|---|---|--------------------------------------------------|
| Certainty assessment                                        |                      |             |             |             |      |                  | Summary of findings |     |   |   |                                                  |
| AUSCAN function (0-36, change from baseline to 4 weeks)     |                      |             |             |             |      |                  |                     |     |   |   |                                                  |
| 401<br>(1 RCT)                                              | serious <sup>a</sup> | not serious | not serious | not serious | none | ⊕⊕⊕○<br>MODERATE | 196                 | 205 | - | - | MD <b>1.2 lower</b><br>(2.6 lower to 0.2 higher) |

CI: Confidence interval; MD: Mean difference

### Explanations

a. Randomization method and allocation concealment not reported

| NSAIDs (400 mg) compared to placebo for Hand OA for Hand OA                                                            |                      |               |              |             |                  |                               |                          |                      |                          |                               |                                                     |
|------------------------------------------------------------------------------------------------------------------------|----------------------|---------------|--------------|-------------|------------------|-------------------------------|--------------------------|----------------------|--------------------------|-------------------------------|-----------------------------------------------------|
| Bibliography: . NSAIDs versus No Treatment for Hand OA. Cochrane Database of Systematic Reviews [Year], Issue [Issue]. |                      |               |              |             |                  |                               |                          |                      |                          |                               |                                                     |
| Certainty assessment                                                                                                   |                      |               |              |             |                  |                               | Summary of findings      |                      |                          |                               |                                                     |
| Nº of participants (studies)<br>Follow-up                                                                              | Risk of bias         | Inconsistency | Indirectness | Imprecision | Publication bias | Overall certainty of evidence | Study event rates (%)    |                      | Relative effect (95% CI) | Anticipated absolute effects  |                                                     |
|                                                                                                                        |                      |               |              |             |                  |                               | With placebo for Hand OA | With NSAIDs (400 mg) |                          | Risk with placebo for Hand OA | Risk difference with NSAIDs (400 mg)                |
| VAS pain (0-100, change from baseline to 4 weeks)                                                                      |                      |               |              |             |                  |                               |                          |                      |                          |                               |                                                     |
| 389<br>(1 RCT)                                                                                                         | serious <sup>a</sup> | not serious   | not serious  | not serious | none             | ⊕⊕⊕○<br>MODERATE              | 196                      | 193                  | -                        | -                             | MD <b>10.7 lower</b><br>(15.13 lower to 6.27 lower) |
| AUSCAN pain (0-20, change from baseline to 4 weeks)                                                                    |                      |               |              |             |                  |                               |                          |                      |                          |                               |                                                     |

| NSAIDs (400 mg) compared to placebo for Hand OA for Hand OA                                                            |                      |             |             |             |      |                     |     |     |   |   |                                                   |
|------------------------------------------------------------------------------------------------------------------------|----------------------|-------------|-------------|-------------|------|---------------------|-----|-----|---|---|---------------------------------------------------|
| Bibliography: . NSAIDs versus No Treatment for Hand OA. Cochrane Database of Systematic Reviews [Year], Issue [Issue]. |                      |             |             |             |      |                     |     |     |   |   |                                                   |
| Certainty assessment                                                                                                   |                      |             |             |             |      | Summary of findings |     |     |   |   |                                                   |
| 389<br>(1 RCT)                                                                                                         | serious <sup>a</sup> | not serious | not serious | not serious | none | ⊕⊕⊕○<br>MODERATE    | 196 | 193 | - | - | MD <b>1.8 lower</b><br>(2.66 lower to 0.94 lower) |
| AUSCAN function (0-36, change from baseline to 4 weeks)                                                                |                      |             |             |             |      |                     |     |     |   |   |                                                   |
| 389<br>(1 RCT)                                                                                                         | serious <sup>a</sup> | not serious | not serious | not serious | none | ⊕⊕⊕○<br>MODERATE    | 196 | 193 | - | - | MD <b>2.9 lower</b><br>(4.34 lower to 1.46 lower) |

CI: Confidence interval; MD: Mean difference

### Explanations

a. Randomization method and allocation concealment not reported

## References

1. Grifka JK, Zacher J, Brown JP, Seriola B, Lee A, Moore A, Gimona A. Efficacy and tolerability of lumiracoxib versus placebo in patients with osteoarthritis of the hand. Clin Exp Rheum. 2004;22:589-596.

### PICO 2. Acetaminophen compared to no treatment in patients with hand OA

Summary. The literature searches did not identify any studies that addressed this question.

Quality of evidence across all critical outcomes: Very low

**PICO 3. Bisphosphonates compared to no treatment in patients with hand OA**

Summary. The literature searches did not identify any studies that addressed this question.

Quality of evidence across all critical outcomes: Very low

**PICO 4. Glucosamine compared to no treatment in patients with hand OA**

Summary. The literature searches did not identify any studies that addressed this question.

Quality of evidence across all critical outcomes: Very low

**PICO 5: Chondroitin compared to no treatment for hand OA**

Summary: One randomized trial compared chondroitin to no treatment (placebo) in 162 patients with hand OA.<sup>[1]</sup> At 6 months, this study found significantly lower scores in pain (VAS) and self-reported function (FIHOA) favoring chondroitin over no treatment, although the wide CIs include the possibility of a non-clinically significant difference between groups. Serious adverse event rates were similar in both groups, although the small number of events means the possibility of a between-group difference cannot be ruled out.

Overall quality of evidence for all critical outcomes: Low

| <b>Chondroitin compared to no treatment for hand OA</b>    |                     |                      |                     |                    |                         |                                      |                            |                         |                                 |                                     |                                         |
|------------------------------------------------------------|---------------------|----------------------|---------------------|--------------------|-------------------------|--------------------------------------|----------------------------|-------------------------|---------------------------------|-------------------------------------|-----------------------------------------|
| <b>Certainty assessment</b>                                |                     |                      |                     |                    |                         |                                      | <b>Summary of findings</b> |                         |                                 |                                     |                                         |
| <b>Nº of participants (studies) Follow-up</b>              | <b>Risk of bias</b> | <b>Inconsistency</b> | <b>Indirectness</b> | <b>Imprecision</b> | <b>Publication bias</b> | <b>Overall certainty of evidence</b> | <b>Number of events</b>    |                         | <b>Relative effect (95% CI)</b> | <b>Anticipated absolute effects</b> |                                         |
|                                                            |                     |                      |                     |                    |                         |                                      | <b>With no treatment</b>   | <b>With chondroitin</b> |                                 | <b>Risk with no treatment</b>       | <b>Risk difference with chondroitin</b> |
| <b>Pain VAS (0-100, lower scores indicate improvement)</b> |                     |                      |                     |                    |                         |                                      |                            |                         |                                 |                                     |                                         |

## Chondroitin compared to no treatment for hand OA

| Certainty assessment                                                                                                         |                      |             |             |                      |      |             | Summary of findings |    |   |   |                                                                                     |
|------------------------------------------------------------------------------------------------------------------------------|----------------------|-------------|-------------|----------------------|------|-------------|---------------------|----|---|---|-------------------------------------------------------------------------------------|
| 162<br>(1 RCT)                                                                                                               | serious <sup>a</sup> | not serious | not serious | serious <sup>b</sup> | none | ⊕⊕○○<br>LOW | 82                  | 80 | - | - | MD <b>8.7 lower</b><br>(16.41 lower to 0.99 lower)<br><br><b>Favors chondroitin</b> |
| <b>FIHOA score (0 to 30, 30 worst possible score) (lower scores indicate improvement)</b>                                    |                      |             |             |                      |      |             |                     |    |   |   |                                                                                     |
| 162<br>(1 RCT)                                                                                                               | serious <sup>a</sup> | not serious | not serious | serious <sup>b</sup> | none | ⊕⊕○○<br>LOW | 82                  | 80 | - | - | MD <b>2.2 lower</b><br>(3.76 lower to 0.64 lower)<br><br><b>Favors chondroitin</b>  |
| <b>Mean grip strength change from baseline to 6 months (performance based function) (higher scores indicate improvement)</b> |                      |             |             |                      |      |             |                     |    |   |   |                                                                                     |
| 162<br>(1 RCT)                                                                                                               | serious <sup>a</sup> | not serious | not serious | serious <sup>b</sup> | none | ⊕⊕○○<br>LOW | 82                  | 80 | - | - | MD <b>1.9 higher</b><br>(0.02 lower to 3.82 higher)                                 |
| <b>SAEs over 6 month trial</b>                                                                                               |                      |             |             |                      |      |             |                     |    |   |   |                                                                                     |

| Chondroitin compared to no treatment for hand OA |                      |             |             |                      |      |                     |                |             |                                  |              |                                                   |
|--------------------------------------------------|----------------------|-------------|-------------|----------------------|------|---------------------|----------------|-------------|----------------------------------|--------------|---------------------------------------------------|
| Certainty assessment                             |                      |             |             |                      |      | Summary of findings |                |             |                                  |              |                                                   |
| 162<br>(1 RCT)                                   | serious <sup>a</sup> | not serious | not serious | serious <sup>b</sup> | none | ⊕⊕○○<br>LOW         | 2/82<br>(2.4%) | 2/80 (2.5%) | <b>OR 1.03</b><br>(0.14 to 7.46) | 24 per 1,000 | <b>1 more per 1,000</b><br>(21 fewer to 133 more) |

**CI:** Confidence interval; **MD:** Mean difference; **OR:** Odds ratio

## Explanations

<sup>a</sup> Differential drop-out, with nearly twice as many dropouts in the placebo group.

<sup>b</sup> Wide 95% CI that includes possibility of no effect or no clinically significant effect

## References

1. Gabay C, Medinger-Sadowski C, Gascon D, Kolo F, Finckh A. Symptomatic effects of chondroitin 4 and chondroitin 6 sulfate on hand osteoarthritis: a randomized, double-blind, placebo-controlled clinical trial at a single center. *Arthritis Rheum.* 2011;63(11):3383-3391.

### PICO 6. Glucosamine plus chondroitin compared to no treatment for hand OA

Summary. The literature searches did not identify any studies that addressed this question.

Quality of evidence across all critical outcomes: Very low

### PICO 7. Non-tramadol opioids compared to no treatment for hand OA

Summary. The literature searches did not identify any studies that addressed this question.

Quality of evidence across all critical outcomes: Very low

**PICO 8. Tramadol compared to no treatment in patients with hand OA**

Summary. The literature searches did not identify any studies that addressed this question.

Quality of evidence across all critical outcomes: Very low

**PICO 9. Duloxetine compared to no treatment in patients with hand OA**

Summary. The literature searches identified one RCT<sup>[1]</sup> that compared Duloxetine (30 to 60 mg daily) to placebo in patients with hand OA. In the intention-to-treat analysis there were no significant between-group differences in AUSCAN pain or function or NRS pain at 13 weeks.

Quality of evidence across all critical outcomes: Low

| <b>Duloxetine compared to no treatment for Hand OA</b>                                                                   |                     |                      |                     |                    |                         |                                      |                                               |                                     |                                 |                                                   |                                                                 |
|--------------------------------------------------------------------------------------------------------------------------|---------------------|----------------------|---------------------|--------------------|-------------------------|--------------------------------------|-----------------------------------------------|-------------------------------------|---------------------------------|---------------------------------------------------|-----------------------------------------------------------------|
| <b>Certainty assessment</b>                                                                                              |                     |                      |                     |                    |                         |                                      | <b>Summary of findings</b>                    |                                     |                                 |                                                   |                                                                 |
| <b>Nº of participants (studies) Follow-up</b>                                                                            | <b>Risk of bias</b> | <b>Inconsistency</b> | <b>Indirectness</b> | <b>Imprecision</b> | <b>Publication bias</b> | <b>Overall certainty of evidence</b> | <b>Number of patients</b>                     |                                     | <b>Relative effect (95% CI)</b> | <b>Anticipated absolute effects</b>               |                                                                 |
|                                                                                                                          |                     |                      |                     |                    |                         |                                      | <b>With no treatment (placebo) for 13 wks</b> | <b>With duloxetine for 13 weeks</b> |                                 | <b>Risk with no treatment (placebo) for 8 wks</b> | <b>Risk difference with diclofenac sodium gel 1% (Voltaren)</b> |
| <b>AUSCAN pain index (0 no pain, 100 extreme pain) change from baseline to 8 wks (lower scores indicate improvement)</b> |                     |                      |                     |                    |                         |                                      |                                               |                                     |                                 |                                                   |                                                                 |



| Duloxetine compared to no treatment for Hand OA                                                                             |                      |             |             |                      |      |                     |    |    |   |                                       |                                                          |
|-----------------------------------------------------------------------------------------------------------------------------|----------------------|-------------|-------------|----------------------|------|---------------------|----|----|---|---------------------------------------|----------------------------------------------------------|
| Certainty assessment                                                                                                        |                      |             |             |                      |      | Summary of findings |    |    |   |                                       |                                                          |
| 43<br>(1 RCT)                                                                                                               | serious <sup>a</sup> | not serious | not serious | serious <sup>b</sup> | none | ⊕⊕○○<br>LOW         | 22 | 21 | - | The mean AUSCAN pain was <b>0</b>     | MD <b>10.81 higher</b><br>(79.75 lower to 101.37 higher) |
| <b>AUSCAN function index (0 very good, 100 very poor) change from baseline to 8 wks (lower scores indicate improvement)</b> |                      |             |             |                      |      |                     |    |    |   |                                       |                                                          |
| 43<br>(1 RCT)                                                                                                               | serious <sup>a</sup> | not serious | not serious | serious <sup>b</sup> | none | ⊕⊕○○<br>LOW         | 22 | 21 | - | The mean AUSCAN function was <b>0</b> | MD <b>34.5 lower</b><br>(195.82 lower to 126.82 higher)  |
| <b>NRS pain (0 to 10, lower scores indicate improvement)</b>                                                                |                      |             |             |                      |      |                     |    |    |   |                                       |                                                          |
| 43<br>(1 RCT)                                                                                                               | serious <sup>a</sup> | not serious | not serious | serious <sup>b</sup> | none | ⊕⊕○○<br>LOW         | 22 | 21 | - | The mean NRS pain was <b>0</b>        | MD <b>1.4 lower</b><br>(3.15 lower to 0.35 higher)       |

CI: Confidence interval; MD: Mean difference

### Explanations

- a. Unclear description of allocation concealment, >20% attrition in treatment group
- b. Wide 95% CI that overlaps line of no effect

## References

1. Sofat N, Harrison A, Russell MD, Ayis S, Kiely PD, Baker EH, et al. The effect of pregabalin or duloxetine on arthritis pain: a clinical and mechanistic study in people with hand osteoarthritis. *J Pain Res.* 2017;10:2437-2449.

### PICO 11: Topical NSAIDs compared to no treatment for hand OA

Summary: One randomized trial compared diclofenac sodium gel 1% (Voltaren) to no treatment (placebo) in 385 patients with hand OA.<sup>[1]</sup> This study found lower AUSCAN pain and function scores favoring diclofenac at 8 weeks, although only the function score change from baseline to 8 weeks was significantly improved compared to placebo. Although more patients in the diclofenac group experienced skin reactions, the 95% CI was wide and there was no significant between-group difference.

Overall quality of evidence for all critical outcomes: Low

| <b>Diclofenac sodium gel 1% (Voltaren) compared to no treatment (placebo) for 8 wks for hand OA</b>                      |                     |                      |                     |                    |                         |                                      |                                              |                                                 |                                 |                                                   |                                                                 |
|--------------------------------------------------------------------------------------------------------------------------|---------------------|----------------------|---------------------|--------------------|-------------------------|--------------------------------------|----------------------------------------------|-------------------------------------------------|---------------------------------|---------------------------------------------------|-----------------------------------------------------------------|
| <b>Certainty assessment</b>                                                                                              |                     |                      |                     |                    |                         |                                      | <b>Summary of findings</b>                   |                                                 |                                 |                                                   |                                                                 |
| <b>Nº of participants (studies)<br/>Follow-up</b>                                                                        | <b>Risk of bias</b> | <b>Inconsistency</b> | <b>Indirectness</b> | <b>Imprecision</b> | <b>Publication bias</b> | <b>Overall certainty of evidence</b> | <b>Number of patients</b>                    |                                                 | <b>Relative effect (95% CI)</b> | <b>Anticipated absolute effects</b>               |                                                                 |
|                                                                                                                          |                     |                      |                     |                    |                         |                                      | <b>With no treatment (placebo) for 8 wks</b> | <b>With diclofenac sodium gel 1% (Voltaren)</b> |                                 | <b>Risk with no treatment (placebo) for 8 wks</b> | <b>Risk difference with diclofenac sodium gel 1% (Voltaren)</b> |
| <b>AUSCAN pain index (0 no pain, 100 extreme pain) change from baseline to 8 wks (lower scores indicate improvement)</b> |                     |                      |                     |                    |                         |                                      |                                              |                                                 |                                 |                                                   |                                                                 |

| <b>Diclofenac sodium gel 1% (Voltaren) compared to no treatment (placebo) for 8 wks for hand OA</b>                         |                      |             |             |                      |      |                            |                 |                 |                                  |              |                                                     |
|-----------------------------------------------------------------------------------------------------------------------------|----------------------|-------------|-------------|----------------------|------|----------------------------|-----------------|-----------------|----------------------------------|--------------|-----------------------------------------------------|
| <b>Certainty assessment</b>                                                                                                 |                      |             |             |                      |      | <b>Summary of findings</b> |                 |                 |                                  |              |                                                     |
| 385<br>(1 RCT)                                                                                                              | serious <sup>a</sup> | not serious | not serious | serious <sup>b</sup> | none | ⊕⊕○○<br>LOW                | 187             | 198             | -                                | -            | MD <b>4.7 lower</b><br>(10.17 lower to 0.77 higher) |
| <b>AUSCAN function index (0 very good, 100 very poor) change from baseline to 8 wks (lower scores indicate improvement)</b> |                      |             |             |                      |      |                            |                 |                 |                                  |              |                                                     |
| 385<br>(1 RCT)                                                                                                              | serious <sup>a</sup> | not serious | not serious | not serious          | none | ⊕⊕⊕○<br>MODERATE           | 187             | 198             | -                                | -            | MD <b>7.3 lower</b><br>(12.86 lower to 1.74 higher) |
| <b>skin reaction (application site reaction)</b>                                                                            |                      |             |             |                      |      |                            |                 |                 |                                  |              |                                                     |
| 385<br>(1 RCT)                                                                                                              | serious <sup>a</sup> | not serious | not serious | serious <sup>b</sup> | none | ⊕⊕○○<br>LOW                | 4/187<br>(2.1%) | 9/198<br>(4.5%) | <b>OR 2.18</b><br>(0.66 to 7.20) | 21 per 1,000 | <b>24 more per 1,000</b><br>(7 fewer to 115 more)   |

**CI:** Confidence interval; **MD:** Mean difference; **OR:** Odds ratio

## Explanations

a Randomization method and allocation concealment not reported.

b Wide 95% CI that overlaps with the line of no difference.

## References

1. Altman RD, Dreiser RL, Fisher CL, Chase WF, Dreher DS, Zacher J. Diclofenac sodium gel in patients with primary hand osteoarthritis: a randomized, double-blind, placebo-controlled trial. J Rheumatol. 2009;36(9):1991-1999.

**PICO 12. Topical capsaicin compared to no treatment in patients with hand OA**

Summary. The literature searches did not identify any studies that addressed this question.

Quality of evidence across all critical outcomes: Very low

**PICO 13. Iontophoresis compared to no treatment in patients with hand OA**

Summary. The literature searches did not identify any studies that addressed this question.

Quality of evidence across all critical outcomes: Very low

**PICO 14. Acetaminophen compared to oral NSAIDs in patients with hand OA**

Summary. The literature searches did not identify any studies that addressed this question.

Quality of evidence across all critical outcomes: Very low

**PICO 15. Glucosamine compared to oral NSAIDs in patients with hand OA**

Summary. The literature searches did not identify any studies that addressed this question.

Quality of evidence across all critical outcomes: Very low

**PICO 16. Chondroitin compared to oral NSAIDs in patients with hand OA**

Summary. The literature searches did not identify any studies that addressed this question.

Quality of evidence across all critical outcomes: Very low

**PICO 17. Glucosamine plus chondroitin compared to oral NSAIDs in patients with hand OA**

Summary. The literature searches did not identify any studies that addressed this question.

Quality of evidence across all critical outcomes: Very low

**PICO 18. Non-tramadol opioids compared to oral NSAIDs in patients with hand OA**

Summary. The literature searches did not identify any studies that addressed this question.

Quality of evidence across all critical outcomes: Very low

**PICO 19. Tramadol compared to oral NSAIDs in patients with hand OA**

Summary. The literature searches did not identify any studies that addressed this question.

Quality of evidence across all critical outcomes: Very low

**PICO 20. Duloxetine compared to oral NSAIDs in patients with hand OA**

Summary. The literature searches did not identify any studies that addressed this question.

Quality of evidence across all critical outcomes: Very low

**PICO 21. Anti-nerve growth factor compared to oral NSAIDs in patients with hand OA**

Summary. The literature searches did not identify any studies that addressed this question.

Quality of evidence across all critical outcomes: Very low

**PICO 22. Topical NSAIDs compared to oral NSAIDs in patients with hand OA**

Summary. The literature searches did not identify any studies that addressed this question.

Quality of evidence across all critical outcomes: Very low

**PICO 23. Topical capsaicin compared to oral NSAIDs in patients with hand OA**

Summary. The literature searches did not identify any studies that addressed this question.

Quality of evidence across all critical outcomes: Very low

**PICO 24. Iontophoresis compared to oral NSAIDs in patients with hand OA**

Summary. The literature searches did not identify any studies that addressed this question.

Quality of evidence across all critical outcomes: Very low

**PICO 25 Intra-articular corticosteroid vs oral NSAIDS for hand OA**

Summary. Two double-blind RCTs indirectly addressed this comparison.<sup>[1,2]</sup> Both studies compared intra-articular corticosteroid vs intra-articular placebo (saline) injections in patients with hand OA. In one study<sup>[1]</sup> patients in both groups were allowed to take oral NSAIDs, while the other trial did not mention anything about NSAID use.<sup>[2]</sup> There were no significant differences between groups for pain (VAS), function (DASH), or grip strength, but the findings were imprecise. The combination of indirectness in the comparison and imprecision in the results means the strength of evidence for all outcomes was low.

Overall strength of evidence for all critical outcomes: Low

| Ref ID, Author, year | Study type | Duration | Population Description | Treatment given to relevant population | Results |
|----------------------|------------|----------|------------------------|----------------------------------------|---------|
|----------------------|------------|----------|------------------------|----------------------------------------|---------|

|                           |                      |        |                                                                    |                                                                                                                                                      |                                                                                                                                                                                                                                                                                                                                                                                                                                                                                                                                                                                                                                                                                                          |
|---------------------------|----------------------|--------|--------------------------------------------------------------------|------------------------------------------------------------------------------------------------------------------------------------------------------|----------------------------------------------------------------------------------------------------------------------------------------------------------------------------------------------------------------------------------------------------------------------------------------------------------------------------------------------------------------------------------------------------------------------------------------------------------------------------------------------------------------------------------------------------------------------------------------------------------------------------------------------------------------------------------------------------------|
| 4300<br>Heyworth,<br>2008 | Double-<br>blind RCT | 26 wks | 40 patients with<br>CMC joint OA<br>See Revman for<br>more details | Intra-articular steroid vs<br>intra-articular placebo<br>injection. Oral NSAIDS<br>permitted throughout trial.<br>See Revman for more<br>details     | <p>Data reported in graph form, no SD or SE provided.<br/>There were no significant differences between groups for pain (VAS), function (DASH), or grip strength.</p> <p><b>Grip strength</b><br/>placebo (n=18)<br/>Baseline 39<br/>26 wks 36<br/>Steroid (n=22)<br/>Baseline 41<br/>26 wks 38</p> <p><b>DASH (self-reported function)</b><br/>placebo (n=18)<br/>Baseline 33<br/>26 wks 22<br/>Steroid (n=22)<br/>Baseline 41<br/>26 wks 30</p> <p><b>Pinch strength key pinch</b> – no data presented</p> <p><b>Pinch strength – tip pinch</b> no data presented</p> <p><b>Pain (VAS)</b><br/>placebo (n=18)<br/>Baseline 4.5<br/>26 wks 3.95<br/>Steroid (n=22)<br/>Baseline 4.8<br/>26 wks 3.75</p> |
| 6633<br>Meenagh,<br>2004  | Double-<br>blind RCT | 24 wks | 40 patients with<br>CMC joint OA<br>See Revman for<br>more details | Intra-articular steroid vs<br>intra-articular placebo<br>injection.<br>No mention either way that<br>patients could or could not<br>use oral NSAIDS. | <p>Followup data are reported as median change scores (interquartile range) compared to baseline. There was no significant between-group difference in pain (VAS).</p> <p><b>Pain VAS</b><br/>Placebo (n=20)<br/>Baseline median score 56 (50 to 78)<br/>24 wks 14.0 (-12.5 to 16.9)</p>                                                                                                                                                                                                                                                                                                                                                                                                                 |

|  |  |  |  |                             |                                                                                    |
|--|--|--|--|-----------------------------|------------------------------------------------------------------------------------|
|  |  |  |  | See Revman for more details | Steroid (n=20)<br>Baseline median score 52 (40 to 72)<br>24 wks 0.0 (-12.5 to 2.3) |
|--|--|--|--|-----------------------------|------------------------------------------------------------------------------------|

## References

1. Heyworth BE, Lee JH, Kim PD, Lipton CB, Strauch RJ, Rosenwasser MP. Hylan versus corticosteroid versus placebo for treatment of basal joint arthritis: a prospective, randomized, double-blinded clinical trial. *J Hand Surg Am.* 2008;33(1):40-48.
2. Meenagh GK, Patton J, Kynes C, Wright GD. A randomised controlled trial of intra-articular corticosteroid injection of the carpometacarpal joint of the thumb in osteoarthritis. *Ann Rheum Dis.* 2004;63(10):1260-1263.

### PICO 26. Intra articular hyaluronic acid compared to oral NSAIDS for hand OA

**Summary.** Two RCTs indirectly addressed this question by comparing intra-articular hyaluronic acid to intra-articular saline in patients with hand OA.<sup>[1,2]</sup> All patients in one trial<sup>[1]</sup> had previously not responded to NSAIDs, and no mention was made regarding whether NSAID use was allowed during the trial. The other trial<sup>[2]</sup> allowed NSAID use. At 24 weeks follow-up in one trial,<sup>[1]</sup> VAS pain and functional status did not differ significantly between groups, but the 95% CI was too wide to rule out the possibility of a benefit from hyaluronic acid injection (Table 1). The other trial<sup>[2]</sup> did not report measures of dispersion and found no significant difference between groups in VAS pain, function (DASH) or grip strength at 26 weeks follow-up, but the findings were imprecise (Table 2).

Overall quality of evidence for all critical outcomes: Very low

**Table 1. PICO 26 intra articular hyaluronic acid compared to oral NSAIDS for hand OA**

| Certainty assessment |  |               |              |             |                  |                   | Summary of findings |                 |                              |
|----------------------|--|---------------|--------------|-------------|------------------|-------------------|---------------------|-----------------|------------------------------|
| Nº of participants   |  | Inconsistency | Indirectness | Imprecision | Publication bias | Overall certainty | Number of patients  | Relative effect | Anticipated absolute effects |
|                      |  |               |              |             |                  |                   |                     |                 |                              |



| <b>Table 1. PICO 26 intra articular hyaluronic acid compared to oral NSAIDS for hand OA</b>         |                             |             |                      |                      |      |                          |                                                 |                                                              |                     |                                          |                                                                                             |
|-----------------------------------------------------------------------------------------------------|-----------------------------|-------------|----------------------|----------------------|------|--------------------------|-------------------------------------------------|--------------------------------------------------------------|---------------------|------------------------------------------|---------------------------------------------------------------------------------------------|
| <b>Certainty assessment</b>                                                                         |                             |             |                      |                      |      |                          | <b>Summary of findings</b>                      |                                                              |                     |                                          |                                                                                             |
| <b>(studies)<br/>Follow-up</b>                                                                      | <b>Risk<br/>of<br/>bias</b> |             |                      |                      |      | <b>of<br/>evidence</b>   | <b>With<br/>intra-<br/>articular<br/>saline</b> | <b>With<br/>intra-<br/>articular<br/>hyaluronic<br/>acid</b> | <b>(95%<br/>CI)</b> | <b>Risk<br/>with<br/>oral<br/>NSAIDS</b> | <b>Risk<br/>difference<br/>with PICO<br/>26 intra<br/>articular<br/>hyaluronic<br/>acid</b> |
| <b>VAS pain at 24 wks followup, post scores only (0-100, lower scores indicate improvement)</b>     |                             |             |                      |                      |      |                          |                                                 |                                                              |                     |                                          |                                                                                             |
| 62<br>(1 RCT)                                                                                       | serious <sup>a</sup>        | not serious | serious <sup>b</sup> | serious <sup>c</sup> | none | ⊕○○○<br>○<br>VERY<br>LOW | 31                                              | 31                                                           | -                   | -                                        | MD <b>2.5<br/>lower</b><br>(8.05 lower<br>to 3.05<br>higher)                                |
| <b>Dreiser functional index, 24 wks, post scores only (0-30, lower scores indicate improvement)</b> |                             |             |                      |                      |      |                          |                                                 |                                                              |                     |                                          |                                                                                             |
| 62<br>(1 RCT)                                                                                       | serious <sup>a</sup>        | not serious | serious <sup>b</sup> | serious <sup>c</sup> | none | ⊕○○○<br>○<br>VERY<br>LOW | 31                                              | 31                                                           | -                   | -                                        | MD <b>4<br/>lower</b><br>(8.12 lower<br>to 0.12<br>higher)                                  |

**CI:** Confidence interval; **MD:** Mean difference

## Explanations

a Allocation concealment and blinding of outcome assessor not reported, some outcomes not reported for both groups separately

b Control group received intra-articular saline, not reported whether any patients in either group received NSAIDs.

c. Wide 95% CI that crosses line of no effect

**Table 2. RCT data not suitable for effect size calculation or combining with other data**

| Ref ID, Author, year   | Study type       | Duration | Population Description        | Treatment given to relevant population                                                              | Results                                                                                                                                                                                                                                                                                                                                                                                                                                                                                                                                                                                                                                                                                                                                                                                                                                                                                                                                                                                                                                                             |
|------------------------|------------------|----------|-------------------------------|-----------------------------------------------------------------------------------------------------|---------------------------------------------------------------------------------------------------------------------------------------------------------------------------------------------------------------------------------------------------------------------------------------------------------------------------------------------------------------------------------------------------------------------------------------------------------------------------------------------------------------------------------------------------------------------------------------------------------------------------------------------------------------------------------------------------------------------------------------------------------------------------------------------------------------------------------------------------------------------------------------------------------------------------------------------------------------------------------------------------------------------------------------------------------------------|
| 4300<br>Heyworth, 2008 | Double-blind RCT | 26 wks   | 38 patients with CMC joint OA | Intra-articular hylan vs intra-articular placebo injection. Oral NSAIDS permitted throughout trial. | <p>Data reported in graph form, no SD or SE provided. There was no significant difference between groups in pain, DASH, or grip strength.</p> <p><b>Grip strength</b><br/>                     placebo (n=18)<br/>                     Baseline 39<br/>                     26 wks 36<br/>                     Hylan (n=20)<br/>                     Baseline 42<br/>                     26 wks 45</p> <p><b>DASH (self-reported function)</b><br/>                     placebo (n=18)<br/>                     Baseline 33<br/>                     26 wks 22<br/>                     Hylan (n=20)<br/>                     Baseline 37<br/>                     26 wks 26</p> <p><b>Pinch strength key pinch</b> – no data presented</p> <p><b>Pinch strength – tip pinch</b> no data presented</p> <p><b>Pain (VAS)</b><br/>                     placebo (n=18)<br/>                     Baseline 4.5<br/>                     26 wks 3.95<br/>                     Hylan (n=20)<br/>                     Baseline 4.8<br/>                     26 wks 3.3</p> |

## References

1. Figen Ayhan F, Ustun N. The evaluation of efficacy and tolerability of Hylan G-F 20 in bilateral thumb base osteoarthritis: 6 months follow-up. Clin Rheumatol. 2009;28(5):535-541.
2. Heyworth BE, Lee JH, Kim PD, Lipton CB, Strauch RJ, Rosenwasser MP. Hylan versus corticosteroid versus placebo for treatment of basal joint arthritis: a prospective, randomized, double-blinded clinical trial. J Hand Surg Am. 2008;33(1):40-48.

### **PICO 27. Tramadol compared to non-tramadol opioids in patients with hand OA**

Summary. The literature searches did not identify any studies that addressed this question.

Quality of evidence across all critical outcomes: Very low

### **PICO 28. Topical capsaicin compared to topical NSAIDs in patients with hand OA**

Summary. The literature searches did not identify any studies that addressed this question.

Quality of evidence across all critical outcomes: Very low

### **PICO 29. Intra articular hyaluronic acid compared to intra-articular steroid for hand OA**

Summary. Three RCTs compared intra-articular hyaluronic acid to intra-articular steroid in patients with hand OA.<sup>[1-3]</sup> At 6 months follow-up in one trial,<sup>[1]</sup> VAS pain was significantly lower in the steroid group compared to the HA group, despite the HA group receiving 3 injections (1 week apart) and the steroid group receiving only one injection (Table 1). The other two trials did not find a significant between group difference in pain at 6 months (Table 2). Functional outcomes (grip or pinch strength) did not differ significantly between groups for two studies,<sup>[1,2]</sup> but the findings were imprecise. The other trial<sup>[3]</sup> did not report measures of dispersion but found significant differences favoring HA grip strength and pinch strength at 6 months (Table 2).

Overall quality of evidence for all critical outcomes: Low

## Intra-articular HA compared to intra-articular steroid for hand OA

| Certainty assessment                                                                |                      |               |              |                      |                  |                               | Summary of findings          |                         |                          |                                   |                                                                                   |
|-------------------------------------------------------------------------------------|----------------------|---------------|--------------|----------------------|------------------|-------------------------------|------------------------------|-------------------------|--------------------------|-----------------------------------|-----------------------------------------------------------------------------------|
| Nº of participants (studies)<br>Follow-up                                           | Risk of bias         | Inconsistency | Indirectness | Imprecision          | Publication bias | Overall certainty of evidence | Number of patients           |                         | Relative effect (95% CI) | Anticipated absolute effects      |                                                                                   |
|                                                                                     |                      |               |              |                      |                  |                               | With intra-articular steroid | With intra-articular HA |                          | Risk with intra-articular steroid | Risk difference with intra-articular HA                                           |
| <b>VAS pain at 6 months, post scores (0-10, lower scores indicate improvement)</b>  |                      |               |              |                      |                  |                               |                              |                         |                          |                                   |                                                                                   |
| 40<br>(1 RCT)                                                                       | serious <sup>a</sup> | not serious   | not serious  | serious <sup>b</sup> | none             | ⊕⊕○○<br>LOW                   | 20                           | 20                      | -                        | -                                 | MD <b>2.2 higher</b><br>(0.95 higher to 3.45 higher)<br><br><b>Favors steroid</b> |
| <b>VAS pain at 12 months, post scores (0-10, lower scores indicate improvement)</b> |                      |               |              |                      |                  |                               |                              |                         |                          |                                   |                                                                                   |
| 40<br>(1 RCT)                                                                       | serious <sup>a</sup> | not serious   | not serious  | serious <sup>b</sup> | none             | ⊕⊕○○<br>LOW                   | 20                           | 20                      | -                        | -                                 | MD <b>1.1 higher</b><br>(0.17 lower to 2.37 higher)                               |
| <b>grip strength at 6 months, change score (higher scores indicate improvement)</b> |                      |               |              |                      |                  |                               |                              |                         |                          |                                   |                                                                                   |
| 40<br>(1 RCT)                                                                       | serious <sup>a</sup> | not serious   | not serious  | serious <sup>b</sup> | none             | ⊕⊕○○<br>LOW                   | 20                           | 20                      | -                        | -                                 | MD <b>0.4 lower</b><br>(6.47 lower to 5.67 higher)                                |

| Intra-articular HA compared to intra-articular steroid for hand OA                    |                      |             |             |                      |      |                     |    |    |   |   |                                                     |
|---------------------------------------------------------------------------------------|----------------------|-------------|-------------|----------------------|------|---------------------|----|----|---|---|-----------------------------------------------------|
| Certainty assessment                                                                  |                      |             |             |                      |      | Summary of findings |    |    |   |   |                                                     |
| <b>grip strength at 12 months, change scores (higher scores indicate improvement)</b> |                      |             |             |                      |      |                     |    |    |   |   |                                                     |
| 40<br>(1 RCT)                                                                         | serious <sup>a</sup> | not serious | not serious | serious <sup>b</sup> | none | ⊕⊕○○<br>LOW         | 20 | 20 | - | - | MD <b>1.2 higher</b><br>(5.38 lower to 7.78 higher) |
| <b>pinch strength, 6 months change scores (higher scores indicate improvement)</b>    |                      |             |             |                      |      |                     |    |    |   |   |                                                     |
| 40<br>(1 RCT)                                                                         | serious <sup>a</sup> | not serious | not serious | serious <sup>b</sup> | none | ⊕⊕○○<br>LOW         | 20 | 20 | - | - | MD <b>1 higher</b><br>(0.35 lower to 2.35 higher)   |
| <b>pinch strength at 12 months, change score (higher scores indicate improvement)</b> |                      |             |             |                      |      |                     |    |    |   |   |                                                     |
| 40<br>(1 RCT)                                                                         | serious <sup>a</sup> | not serious | not serious | serious <sup>b</sup> | none | ⊕⊕○○<br>LOW         | 20 | 20 | - | - | MD <b>0.8 higher</b><br>(0.51 lower to 2.11 higher) |

**CI:** Confidence interval; **MD:** Mean difference

## Explanations

a No blinding of patients or personnel, allocation concealment not reported

b Wide 95% CI, small number of patients

**Table 2.**

| Ref ID, Author, year      | Study type                   | Duration | Population Description                     | Treatment given to relevant population       | Results                                                                                                                                                                                                                                                                                                                                                                                                                                                                                                                                                                                                                                                                                                                                                                                |
|---------------------------|------------------------------|----------|--------------------------------------------|----------------------------------------------|----------------------------------------------------------------------------------------------------------------------------------------------------------------------------------------------------------------------------------------------------------------------------------------------------------------------------------------------------------------------------------------------------------------------------------------------------------------------------------------------------------------------------------------------------------------------------------------------------------------------------------------------------------------------------------------------------------------------------------------------------------------------------------------|
| 4300<br>Heyworth,<br>2008 | Double-blind RCT             | 26 wks   | 42 patients with CMC joint OA              | Hylan vs steroid                             | <p>Data reported in graph form, no SD or SE provided. No significant differences between groups for pain (VAS), function (DASH), and grip strength.</p> <p><b>Grip strength</b><br/> Hylan (n=20)<br/> Baseline 42<br/> 26 wks 45<br/> Steroid (n=22)<br/> Baseline 41<br/> 26 wks 38</p> <p><b>DASH (self-reported function)</b><br/> Hylan (n=20)<br/> Baseline 37<br/> 26 wks 26<br/> Steroid (n=22)<br/> Baseline 41<br/> 26 wks 30</p> <p><b>Pinch strength key pinch</b> – no data presented</p> <p><b>Pinch strength – tip pinch</b> not all data for all time points reported but at 12 weeks hylan (3.3 kg F) and steroid (2.4 kg F).</p> <p><b>Pain (VAS)</b><br/> Hylan (n=20)<br/> Baseline 4.8<br/> 26 wks 3.3<br/> Steroid (n=22)<br/> Baseline 4.8<br/> 26 wks 3.75</p> |
| 4688<br>Fuchs,<br>2006    | Outcome observer blinded RCT | 26 wks   | 56 patients with OA of the thumb CMC joint | Sodium hyaluronic acid (SH Ostenil mini) vs. | <p>Data reported as medians for pain VAS</p> <p>SH<br/> Baseline: 65.5 (n=28)<br/> 26 week followup: 30.0 (n=25)</p>                                                                                                                                                                                                                                                                                                                                                                                                                                                                                                                                                                                                                                                                   |

| Ref ID, Author, year | Study type | Duration | Population Description | Treatment given to relevant population | Results                                                                                                                                                                                                                                                                                                                                                                                                                                                                                                                                                                                                                                                                                                                                                                                                                                                                                                                                                            |
|----------------------|------------|----------|------------------------|----------------------------------------|--------------------------------------------------------------------------------------------------------------------------------------------------------------------------------------------------------------------------------------------------------------------------------------------------------------------------------------------------------------------------------------------------------------------------------------------------------------------------------------------------------------------------------------------------------------------------------------------------------------------------------------------------------------------------------------------------------------------------------------------------------------------------------------------------------------------------------------------------------------------------------------------------------------------------------------------------------------------|
|                      |            |          |                        | triamcinolone acetate (TA Volon)       | <p>% reporting improvement 88%<br/>TA<br/>Baseline: 63.5 (n=28)<br/>26 week followup: 45.5 (n=26)<br/>% reporting improvement 79.1%<br/>There was no statistically significant difference in % reporting improvement in pain, authors stated that non-inferiority was proven for this outcome.</p> <p>Lateral pinch power after 26 weeks<br/>Univariate Mann Whitney estimators and one-sided 97.5% CI for lateral pinch (key grip) strength: after 6 months of treatment moderate superiority of the SH-group was found (MW: 0.6331, lower bound CI: 0.5273, P-value: 0.0226). After 6 months 52.0% of the SH-group and 42.3% of the TA-group patients reported improvement.</p> <p>Pulp pinch power also using MW test:<br/>According to study author superiority of SH-group could be observed (week 26: MW: 0.6062, lower bound CI: 0.474, P-value: 0.1045). After 6 months 40.0% of the SH-group and 28.0% of the TA-group patients reported improvement.</p> |

## References

1. Bahadir C, Onal B, Dayan VY, Gurer N. Comparison of therapeutic effects of sodium hyaluronate and corticosteroid injections on trapeziometacarpal joint osteoarthritis. *Clin Rheumatol*. 2009;28(5):529-533.
2. Heyworth BE, Lee JH, Kim PD, Lipton CB, Strauch RJ, Rosenwasser MP. Hylan versus corticosteroid versus placebo for treatment of basal joint arthritis: a prospective, randomized, double-blinded clinical trial. *J Hand Surg Am*. 2008;33(1):40-48.
3. Fuchs S, Monikes R, Wohlmeiner A, Heyse T. Intra-articular hyaluronic acid compared with corticoid injections for the treatment of rhizarthrosis. *Osteoarthritis Cartilage*. 2006;14(1):82-88.

**PICO 30. Hand exercise plus usual care compared to usual care for hand OA**

Summary. The literature search identified 5 RCTs that addressed this comparison in patients with hand OA.<sup>[1-5]</sup> Three studies that measured pain improvement (AUSCAN score or VAS) found no significant between-group difference at 4 to 12 months follow-up for hand exercise versus usual care (Tables 1 and 2).<sup>[2-4]</sup> Two studies measuring self-reported function (FIHOA or AUSCAN scores) did not find a significant between-group difference at 3-4 months,<sup>[3,5]</sup> but one out of two studies found a significant difference (AUSCAN score) favoring hand exercise at 6 months (Tables 1 and 2).<sup>[5]</sup> Three out of four studies found no significant between-group difference in grip strength at 3-6 months (Tables 1 and 2), but imprecision in effect estimates renders this finding inconclusive. One study found no significant between-group difference in pinch strength (Tables 1).<sup>[2]</sup> Another study that measured pinch strength did not report whether the between-group difference was statistically significant.<sup>[3]</sup>

Quality of evidence across all critical outcomes: Low

| <b>Table 1. Hand exercise compared to usual care for hand OA</b>                     |                      |                      |                      |                    |                         |                                      |                            |                           |                                 |                                     |                                                    |
|--------------------------------------------------------------------------------------|----------------------|----------------------|----------------------|--------------------|-------------------------|--------------------------------------|----------------------------|---------------------------|---------------------------------|-------------------------------------|----------------------------------------------------|
| <b>Certainty assessment</b>                                                          |                      |                      |                      |                    |                         |                                      | <b>Summary of findings</b> |                           |                                 |                                     |                                                    |
| <b>Nº of participants (studies) Follow-up</b>                                        | <b>Risk of bias</b>  | <b>Inconsistency</b> | <b>Indirectness</b>  | <b>Imprecision</b> | <b>Publication bias</b> | <b>Overall certainty of evidence</b> | <b>Number of patients</b>  |                           | <b>Relative effect (95% CI)</b> | <b>Anticipated absolute effects</b> |                                                    |
|                                                                                      |                      |                      |                      |                    |                         |                                      | <b>With usual care</b>     | <b>With hand exercise</b> |                                 | <b>Risk with usual care</b>         | <b>Risk difference with hand exercise</b>          |
| <b>AUSCAN pain mean difference (6 mo) (0-20, lower scores indicate improvement)</b>  |                      |                      |                      |                    |                         |                                      |                            |                           |                                 |                                     |                                                    |
| 257 (1 RCT)                                                                          | serious <sup>a</sup> | not serious          | serious <sup>g</sup> | not serious        | none                    | ⊕⊕○○<br>LOW                          | 127                        | 130                       | -                               | -                                   | MD <b>0.4 lower</b><br>(1.37 lower to 0.57 higher) |
| <b>AUSCAN pain mean difference (12 mo) (0-20, lower scores indicate improvement)</b> |                      |                      |                      |                    |                         |                                      |                            |                           |                                 |                                     |                                                    |
| 257 (1 RCT)                                                                          | serious <sup>a</sup> | not serious          | serious <sup>g</sup> | not serious        | none                    | ⊕⊕○○<br>LOW                          | 127                        | 130                       | -                               | -                                   | MD <b>0.8 lower</b><br>(1.73 lower to 0.13 higher) |



**Table 1. Hand exercise compared to usual care for hand OA**

| <b>Table 1. Hand exercise compared to usual care for hand OA</b>                                        |                      |             |                      |                      |      |                            |     |     |   |   |                                                                                 |
|---------------------------------------------------------------------------------------------------------|----------------------|-------------|----------------------|----------------------|------|----------------------------|-----|-----|---|---|---------------------------------------------------------------------------------|
| <b>Certainty assessment</b>                                                                             |                      |             |                      |                      |      | <b>Summary of findings</b> |     |     |   |   |                                                                                 |
| <b>AUSCAN function mean difference (6 mo) (0-36, lower scores indicate improvement)</b>                 |                      |             |                      |                      |      |                            |     |     |   |   |                                                                                 |
| 257<br>(1 RCT)                                                                                          | serious <sup>a</sup> | not serious | serious <sup>g</sup> | not serious          | none | ⊕⊕○○<br>LOW                | 127 | 130 | - | - | MD <b>1.2 lower</b><br>(3.08 lower to 0.68 higher)                              |
| <b>FIHOA Mean change (3 mo) (0-30, lower scores indicate improvement)</b>                               |                      |             |                      |                      |      |                            |     |     |   |   |                                                                                 |
| 201<br>(2 RCTs)                                                                                         | serious <sup>b</sup> | not serious | serious <sup>g</sup> | serious <sup>c</sup> | none | ⊕○○○<br>VERY LOW           | 99  | 102 | - | - | MD <b>2.27 lower</b><br>(5.4 lower to 0.87 higher)                              |
| <b>FIHOA Mean change (6 mo) (0-30, lower scores indicate improvement)</b>                               |                      |             |                      |                      |      |                            |     |     |   |   |                                                                                 |
| 130<br>(1 RCT)                                                                                          | not serious          | not serious | serious <sup>g</sup> | not serious          | none | ⊕⊕⊕○<br>MODERATE           | 65  | 65  | - | - | MD <b>0.6 lower</b><br>(0.81 lower to 0.39 lower)<br><br><b>Favors exercise</b> |
| <b>Mean change R hand grip strength; Martin vigorimeter (3 mo) (higher scores indicate improvement)</b> |                      |             |                      |                      |      |                            |     |     |   |   |                                                                                 |
| 40<br>(1 RCT)                                                                                           | serious <sup>d</sup> | not serious | serious <sup>g</sup> | serious <sup>c</sup> | none | ⊕○○○<br>VERY LOW           | 20  | 20  | - | - | MD <b>0.09 higher</b><br>(0.03 lower to 0.21 higher)                            |
| <b>Mean change R hand max grip strength; Jaymar dynamom (3 mo) (higher scores indicate improvement)</b> |                      |             |                      |                      |      |                            |     |     |   |   |                                                                                 |

**Table 1. Hand exercise compared to usual care for hand OA**

| Certainty assessment                                                                                               |                      |             |                      |                      |      |                  | Summary of findings |     |   |   |                                                                                     |
|--------------------------------------------------------------------------------------------------------------------|----------------------|-------------|----------------------|----------------------|------|------------------|---------------------|-----|---|---|-------------------------------------------------------------------------------------|
| 130<br>(1 RCT)                                                                                                     | not serious          | not serious | serious <sup>g</sup> | serious <sup>c</sup> | none | ⊕⊕○○<br>LOW      | 65                  | 65  | - | - | MD <b>1.1 higher</b><br>(1.71 lower to 3.91 higher)                                 |
| <b>Mean change R hand max grip strength; Jaymar dynamom (6 mo) (higher scores indicate improvement)</b>            |                      |             |                      |                      |      |                  |                     |     |   |   |                                                                                     |
| 130<br>(1 RCT)                                                                                                     | not serious          | not serious | serious <sup>g</sup> | serious <sup>c</sup> | none | ⊕⊕○○<br>LOW      | 65                  | 65  | - | - | MD <b>1 higher</b><br>(1.85 lower to 3.85 higher)                                   |
| <b>Mean change max grip strength R hand; Grippit electronic device (3 mo) (higher scores indicate improvement)</b> |                      |             |                      |                      |      |                  |                     |     |   |   |                                                                                     |
| 71<br>(1 RCT)                                                                                                      | serious <sup>e</sup> | not serious | serious <sup>g</sup> | not serious          | none | ⊕⊕○○<br>LOW      | 34                  | 37  | - | - | MD <b>51.2 higher</b><br>(24.9 higher to 77.5 higher)<br><br><b>Favors exercise</b> |
| <b>Grip strength (6 mo) (higher scores indicate improvement)</b>                                                   |                      |             |                      |                      |      |                  |                     |     |   |   |                                                                                     |
| 257<br>(1 RCT)                                                                                                     | serious <sup>a</sup> | not serious | serious <sup>g</sup> | serious <sup>c</sup> | none | ⊕○○○<br>VERY LOW | 127                 | 130 | - | - | MD <b>1.7 higher</b><br>(3.64 lower to 7.04 higher)                                 |
| <b>Pinch strength (6 mo) (higher scores indicate improvement)</b>                                                  |                      |             |                      |                      |      |                  |                     |     |   |   |                                                                                     |

**Table 1. Hand exercise compared to usual care for hand OA**

| Certainty assessment                    |                      |             |                      |                           |      |                  | Summary of findings |                |                                    |             |                                                     |
|-----------------------------------------|----------------------|-------------|----------------------|---------------------------|------|------------------|---------------------|----------------|------------------------------------|-------------|-----------------------------------------------------|
| 257<br>(1 RCT)                          | serious <sup>a</sup> | not serious | serious <sup>g</sup> | not serious               | none | ⊕⊕○○<br>LOW      | 127                 | 130            | -                                  | -           | MD <b>0.4 higher</b><br>(0.47 lower to 1.27 higher) |
| <b>Pain/swelling all fingers (3 mo)</b> |                      |             |                      |                           |      |                  |                     |                |                                    |             |                                                     |
| 130<br>(1 RCT)                          | not serious          | not serious | serious <sup>g</sup> | very serious <sup>f</sup> | none | ⊕○○○<br>VERY LOW | 0/65<br>(0.0%)      | 2/65<br>(3.1%) | <b>OR 5.16</b><br>(0.24 to 109.55) | 0 per 1,000 | <b>0 fewer per 1,000</b><br>(0 fewer to 0 fewer)    |

CI: Confidence interval; MD: Mean difference; OR: Odds ratio

## Explanations

- a. Baseline data not presented for all groups
- b. Patients and providers not blinded in one study
- c. Wide 95% CI that overlaps line of no effect
- d. Patients not blinded, randomization method and allocation concealment not reported
- e. Patients and providers not blinded
- f. Very wide 95% CI based on very low number of events
- g. Indirectness due to heterogeneity in the patient populations (mixed different types of hand OA)

**Table 2. RCT data not suitable for effect size calculation or combining with other data**

| Ref ID, Author, year   | Study type                            | Duration                                     | Population Description                                                                                                  | Treatment given to relevant population                                                                                                                     | Results                                                                                                                                                                                                                                                                                                                                                                                                                                                                                                                                                                                                                                                                                                                                                                                                                                                                                                                                                                                                                                                                                                                    |
|------------------------|---------------------------------------|----------------------------------------------|-------------------------------------------------------------------------------------------------------------------------|------------------------------------------------------------------------------------------------------------------------------------------------------------|----------------------------------------------------------------------------------------------------------------------------------------------------------------------------------------------------------------------------------------------------------------------------------------------------------------------------------------------------------------------------------------------------------------------------------------------------------------------------------------------------------------------------------------------------------------------------------------------------------------------------------------------------------------------------------------------------------------------------------------------------------------------------------------------------------------------------------------------------------------------------------------------------------------------------------------------------------------------------------------------------------------------------------------------------------------------------------------------------------------------------|
| 7205<br>Dziedzic, 2015 | RCT (4-groups)                        | Primary outcome at 6 months; 3, 6, 12 months | 257 participants 50 years of age or older with hand OA                                                                  | 4 treatment groups: (1) joint protection; (2) hand exercises; (3) joint protection and hand exercises combined; (4) no joint protection or hand exercises. | <p><u>Note: AUSCAN pain, 6 months:</u> (Adjusted mean difference) 0.06 (-0.85 to 0.97); direction of effect differs with raw calculations</p> <p><u>Adverse events:</u><br/>No adverse events related to interventions were reported.</p>                                                                                                                                                                                                                                                                                                                                                                                                                                                                                                                                                                                                                                                                                                                                                                                                                                                                                  |
| 3715<br>Rogers, 2009   | Randomized controlled crossover trial | 16 weeks                                     | 76 patients aged 50 or over with radiographic OA in at least one hand joint (n=46 completed the full 48-week follow up) | Hand exercise program vs. placebo (sham therapeutic hand cream application)                                                                                | <p><b><u>AUSCAN Physical Function score (16 weeks)</u></b><br/> <u>Exercise group:</u> 476 at baseline vs. 460 at follow-up; difference = -16<br/> <u>Sham group:</u> 473 at baseline vs. 433 at follow-up; difference = -40 (p&lt;0.05)</p> <p><b><u>AUSCAN Pain score (16 weeks)</u></b><br/> <u>Exercise group:</u> 225 at baseline vs. 190 at follow-up; difference = -35 (p&lt;0.05)<br/> <u>Sham group:</u> 230 at baseline vs. 190 at follow-up; difference = -40 (p&lt;0.05)</p> <p><b><u>Max grip strength (16 weeks)</u></b><br/> <u>Exercise group:</u><br/> <u>Right:</u> 42.53 at baseline vs.44.5 at follow-up; difference = 1.98 (p&lt;0.05)<br/> <u>Left:</u> 38.35 at baseline vs.40.88 at follow-up; difference = 2.53 (p&lt;0.05)</p> <p><u>Sham group:</u><br/> <u>Right:</u> 43.28 at baseline vs.43.78 at follow-up; difference = 0.50<br/> <u>Left:</u> 39.70 at baseline vs.39.40 at follow-up; difference = 0.30</p> <p><b><u>Max key pinch strength (16 weeks)</u></b><br/> <u>Exercise group:</u><br/> <u>Right:</u> 10.88 at baseline vs.11.78 at follow-up; difference = 0.90 (p&lt;0.05)</p> |

| Ref ID, Author, year                                                                         | Study type | Duration | Population Description   | Treatment given to relevant population                                                       | Results                                                                                                                                                                                                                                                                                                                                                                                                                                                                                                                                                                                                                                                                                                                                                                                                                                                                                                                                                                                                  |  |  |          |          |  |             |     |      |      |  |  |      |      |      |  |              |     |      |      |       |  |      |     |     |       |  |     |      |      |       |  |      |      |      |       |             |      |      |     |  |  |      |     |     |  |            |     |     |     |  |  |      |      |      |  |
|----------------------------------------------------------------------------------------------|------------|----------|--------------------------|----------------------------------------------------------------------------------------------|----------------------------------------------------------------------------------------------------------------------------------------------------------------------------------------------------------------------------------------------------------------------------------------------------------------------------------------------------------------------------------------------------------------------------------------------------------------------------------------------------------------------------------------------------------------------------------------------------------------------------------------------------------------------------------------------------------------------------------------------------------------------------------------------------------------------------------------------------------------------------------------------------------------------------------------------------------------------------------------------------------|--|--|----------|----------|--|-------------|-----|------|------|--|--|------|------|------|--|--------------|-----|------|------|-------|--|------|-----|-----|-------|--|-----|------|------|-------|--|------|------|------|-------|-------------|------|------|-----|--|--|------|-----|-----|--|------------|-----|-----|-----|--|--|------|------|------|--|
|                                                                                              |            |          |                          |                                                                                              | <p><u>Left</u>: 9.44 at baseline vs.10.68 at follow-up; difference = 1.24 (p&lt;0.05)</p> <p><u>Sham group</u>:</p> <p><u>Right</u>: 11.05 at baseline vs.11.01 at follow-up; difference = 0.04</p> <p><u>Left</u>: 9.49 at baseline vs.9.51 at follow-up; difference = 0.03</p>                                                                                                                                                                                                                                                                                                                                                                                                                                                                                                                                                                                                                                                                                                                         |  |  |          |          |  |             |     |      |      |  |  |      |      |      |  |              |     |      |      |       |  |      |     |     |       |  |     |      |      |       |  |      |      |      |       |             |      |      |     |  |  |      |     |     |  |            |     |     |     |  |  |      |      |      |  |
| 4930 Stamm, 2002                                                                             | RCT        | 3 months | 40 patients with hand OA | Joint protection and home hand exercise instruction vs. controls (information about hand OA) | VAS for pain: n.s. difference between groups (data not shown)                                                                                                                                                                                                                                                                                                                                                                                                                                                                                                                                                                                                                                                                                                                                                                                                                                                                                                                                            |  |  |          |          |  |             |     |      |      |  |  |      |      |      |  |              |     |      |      |       |  |      |     |     |       |  |     |      |      |       |  |      |      |      |       |             |      |      |     |  |  |      |     |     |  |            |     |     |     |  |  |      |      |      |  |
| 2330 Hennig, 2015<br><br>5082 Osteras, 2014<br><br>3715 Rogers, 2009<br><br>4930 Stamm, 2002 | RCTs       | variable |                          | Hand exercise vs. control or sham                                                            | <p><b><u>Grip Strength summary data: % change</u></b></p> <table> <thead> <tr> <th></th> <th></th> <th>% chng L</th> <th>% chng R</th> <th></th> </tr> </thead> <tbody> <tr> <td>2330 Hennig</td> <td>con</td> <td>-7.8</td> <td>-6.1</td> <td></td> </tr> <tr> <td></td> <td>exer</td> <td>21.2</td> <td>26.9</td> <td></td> </tr> <tr> <td>5082 Osteras</td> <td>con</td> <td>-1.8</td> <td>-1.3</td> <td>(3mo)</td> </tr> <tr> <td></td> <td>exer</td> <td>6.2</td> <td>3.5</td> <td>(3mo)</td> </tr> <tr> <td></td> <td>con</td> <td>-5.3</td> <td>-6.7</td> <td>(6mo)</td> </tr> <tr> <td></td> <td>exer</td> <td>-4.8</td> <td>-2.6</td> <td>(6mo)</td> </tr> <tr> <td>3715 Rogers</td> <td>sham</td> <td>-0.8</td> <td>1.2</td> <td></td> </tr> <tr> <td></td> <td>exer</td> <td>6.6</td> <td>4.6</td> <td></td> </tr> <tr> <td>4930 Stamm</td> <td>con</td> <td>5.7</td> <td>5.6</td> <td></td> </tr> <tr> <td></td> <td>exer</td> <td>25.0</td> <td>27.9</td> <td></td> </tr> </tbody> </table> |  |  | % chng L | % chng R |  | 2330 Hennig | con | -7.8 | -6.1 |  |  | exer | 21.2 | 26.9 |  | 5082 Osteras | con | -1.8 | -1.3 | (3mo) |  | exer | 6.2 | 3.5 | (3mo) |  | con | -5.3 | -6.7 | (6mo) |  | exer | -4.8 | -2.6 | (6mo) | 3715 Rogers | sham | -0.8 | 1.2 |  |  | exer | 6.6 | 4.6 |  | 4930 Stamm | con | 5.7 | 5.6 |  |  | exer | 25.0 | 27.9 |  |
|                                                                                              |            | % chng L | % chng R                 |                                                                                              |                                                                                                                                                                                                                                                                                                                                                                                                                                                                                                                                                                                                                                                                                                                                                                                                                                                                                                                                                                                                          |  |  |          |          |  |             |     |      |      |  |  |      |      |      |  |              |     |      |      |       |  |      |     |     |       |  |     |      |      |       |  |      |      |      |       |             |      |      |     |  |  |      |     |     |  |            |     |     |     |  |  |      |      |      |  |
| 2330 Hennig                                                                                  | con        | -7.8     | -6.1                     |                                                                                              |                                                                                                                                                                                                                                                                                                                                                                                                                                                                                                                                                                                                                                                                                                                                                                                                                                                                                                                                                                                                          |  |  |          |          |  |             |     |      |      |  |  |      |      |      |  |              |     |      |      |       |  |      |     |     |       |  |     |      |      |       |  |      |      |      |       |             |      |      |     |  |  |      |     |     |  |            |     |     |     |  |  |      |      |      |  |
|                                                                                              | exer       | 21.2     | 26.9                     |                                                                                              |                                                                                                                                                                                                                                                                                                                                                                                                                                                                                                                                                                                                                                                                                                                                                                                                                                                                                                                                                                                                          |  |  |          |          |  |             |     |      |      |  |  |      |      |      |  |              |     |      |      |       |  |      |     |     |       |  |     |      |      |       |  |      |      |      |       |             |      |      |     |  |  |      |     |     |  |            |     |     |     |  |  |      |      |      |  |
| 5082 Osteras                                                                                 | con        | -1.8     | -1.3                     | (3mo)                                                                                        |                                                                                                                                                                                                                                                                                                                                                                                                                                                                                                                                                                                                                                                                                                                                                                                                                                                                                                                                                                                                          |  |  |          |          |  |             |     |      |      |  |  |      |      |      |  |              |     |      |      |       |  |      |     |     |       |  |     |      |      |       |  |      |      |      |       |             |      |      |     |  |  |      |     |     |  |            |     |     |     |  |  |      |      |      |  |
|                                                                                              | exer       | 6.2      | 3.5                      | (3mo)                                                                                        |                                                                                                                                                                                                                                                                                                                                                                                                                                                                                                                                                                                                                                                                                                                                                                                                                                                                                                                                                                                                          |  |  |          |          |  |             |     |      |      |  |  |      |      |      |  |              |     |      |      |       |  |      |     |     |       |  |     |      |      |       |  |      |      |      |       |             |      |      |     |  |  |      |     |     |  |            |     |     |     |  |  |      |      |      |  |
|                                                                                              | con        | -5.3     | -6.7                     | (6mo)                                                                                        |                                                                                                                                                                                                                                                                                                                                                                                                                                                                                                                                                                                                                                                                                                                                                                                                                                                                                                                                                                                                          |  |  |          |          |  |             |     |      |      |  |  |      |      |      |  |              |     |      |      |       |  |      |     |     |       |  |     |      |      |       |  |      |      |      |       |             |      |      |     |  |  |      |     |     |  |            |     |     |     |  |  |      |      |      |  |
|                                                                                              | exer       | -4.8     | -2.6                     | (6mo)                                                                                        |                                                                                                                                                                                                                                                                                                                                                                                                                                                                                                                                                                                                                                                                                                                                                                                                                                                                                                                                                                                                          |  |  |          |          |  |             |     |      |      |  |  |      |      |      |  |              |     |      |      |       |  |      |     |     |       |  |     |      |      |       |  |      |      |      |       |             |      |      |     |  |  |      |     |     |  |            |     |     |     |  |  |      |      |      |  |
| 3715 Rogers                                                                                  | sham       | -0.8     | 1.2                      |                                                                                              |                                                                                                                                                                                                                                                                                                                                                                                                                                                                                                                                                                                                                                                                                                                                                                                                                                                                                                                                                                                                          |  |  |          |          |  |             |     |      |      |  |  |      |      |      |  |              |     |      |      |       |  |      |     |     |       |  |     |      |      |       |  |      |      |      |       |             |      |      |     |  |  |      |     |     |  |            |     |     |     |  |  |      |      |      |  |
|                                                                                              | exer       | 6.6      | 4.6                      |                                                                                              |                                                                                                                                                                                                                                                                                                                                                                                                                                                                                                                                                                                                                                                                                                                                                                                                                                                                                                                                                                                                          |  |  |          |          |  |             |     |      |      |  |  |      |      |      |  |              |     |      |      |       |  |      |     |     |       |  |     |      |      |       |  |      |      |      |       |             |      |      |     |  |  |      |     |     |  |            |     |     |     |  |  |      |      |      |  |
| 4930 Stamm                                                                                   | con        | 5.7      | 5.6                      |                                                                                              |                                                                                                                                                                                                                                                                                                                                                                                                                                                                                                                                                                                                                                                                                                                                                                                                                                                                                                                                                                                                          |  |  |          |          |  |             |     |      |      |  |  |      |      |      |  |              |     |      |      |       |  |      |     |     |       |  |     |      |      |       |  |      |      |      |       |             |      |      |     |  |  |      |     |     |  |            |     |     |     |  |  |      |      |      |  |
|                                                                                              | exer       | 25.0     | 27.9                     |                                                                                              |                                                                                                                                                                                                                                                                                                                                                                                                                                                                                                                                                                                                                                                                                                                                                                                                                                                                                                                                                                                                          |  |  |          |          |  |             |     |      |      |  |  |      |      |      |  |              |     |      |      |       |  |      |     |     |       |  |     |      |      |       |  |      |      |      |       |             |      |      |     |  |  |      |     |     |  |            |     |     |     |  |  |      |      |      |  |

## References

1. Hennig T, Haehre L, Hornburg VT, Mowinckel P, Norli ES, Kjekken I. Effect of home-based hand exercises in women with hand osteoarthritis: a randomised controlled trial. *Ann Rheum Dis*. 2015;74(8):1501-1508.
2. Dziedzic K, Nicholls E, Hill S, Hammond A, Handy J, Thomas E, et al. Self-management approaches for osteoarthritis in the hand: a 2x2 factorial randomised trial. *Ann Rheum Dis*. 2015;74(1):108-118.
3. Rogers MW, Wilder FV. Exercise and hand osteoarthritis symptomatology: a controlled crossover trial. *J Hand Ther*. 2009;22(1):10-17; discussion 19-20; quiz 18.
4. Stamm TA, Machold KP, Smolen JS, Fischer S, Redlich K, Graninger W, et al. Joint protection and home hand exercises improve hand function in patients with hand osteoarthritis: a randomized controlled trial. *Arthritis Rheum*. 2002;47(1):44-49.
5. Osteras N, Hagen KB, Grotle M, Sand-Svartrud AL, Mowinckel P, Kjekken I. Limited effects of exercises in people with hand osteoarthritis: results from a randomized controlled trial. *Osteoarthritis Cartilage*. 2014;22(9):1224-1233.

**PICO 31. Paraffin/usual care compared to usual care for hand OA**

Summary. Two RCTs with 107 patients addressed this comparison.<sup>[1,2]</sup> In one trial<sup>[1]</sup>, treatment duration was 3 weeks with a follow-up of 12 weeks. At 12 weeks, a significant between-group difference favoring paraffin over usual care for improved AUSCAN pain, but the finding was imprecise due to the small sample size and wide 95% CI. No significant between-group difference was found for AUSCAN function, but imprecision due to the wide 95% CI means that a significant difference favoring paraffin could not be ruled out (Table 1). Grip strength was significantly higher at 12 weeks in the paraffin group, while pinch strength did not show a significant between-group difference (Table 2). The second trial<sup>[2]</sup> had a treatment duration of 2 weeks with a 6-week follow-up. At 2 and 6 weeks, paraffin plus home exercise showed significantly greater benefit compared to home exercise alone for VAS pain, AUSCAN, HAQ, hand grip strength, and pinch strength.

Overall quality of evidence for all critical outcomes: Low

| <b>PICO 31 paraffin/UC compared to UC for hand OA</b> |                     |                      |                     |                    |                         |                                      |                            |                         |                                 |                                     |                                         |
|-------------------------------------------------------|---------------------|----------------------|---------------------|--------------------|-------------------------|--------------------------------------|----------------------------|-------------------------|---------------------------------|-------------------------------------|-----------------------------------------|
| <b>Certainty assessment</b>                           |                     |                      |                     |                    |                         |                                      | <b>Summary of findings</b> |                         |                                 |                                     |                                         |
| <b>No of participants (studies) Follow-up</b>         | <b>Risk of bias</b> | <b>Inconsistency</b> | <b>Indirectness</b> | <b>Imprecision</b> | <b>Publication bias</b> | <b>Overall certainty of evidence</b> | <b>Number of patients</b>  |                         | <b>Relative effect (95% CI)</b> | <b>Anticipated absolute effects</b> |                                         |
|                                                       |                     |                      |                     |                    |                         |                                      | <b>With UC</b>             | <b>With paraffin/UC</b> |                                 | <b>Risk with UC</b>                 | <b>Risk difference with paraffin/UC</b> |
|                                                       |                     |                      |                     |                    |                         |                                      |                            |                         |                                 |                                     |                                         |

| <b>PICO 31 paraffin/UC compared to UC for hand OA</b>                      |                      |             |             |                      |      |                            |    |    |   |   |                                                                                  |
|----------------------------------------------------------------------------|----------------------|-------------|-------------|----------------------|------|----------------------------|----|----|---|---|----------------------------------------------------------------------------------|
| <b>Certainty assessment</b>                                                |                      |             |             |                      |      | <b>Summary of findings</b> |    |    |   |   |                                                                                  |
| <b>AUSCAN pain at 12 wks (0-20, lower scores indicate improvement)</b>     |                      |             |             |                      |      |                            |    |    |   |   |                                                                                  |
| 46<br>(1 RCT)                                                              | serious <sup>a</sup> | not serious | not serious | serious <sup>b</sup> | none | ⊕⊕○○<br>LOW                | 22 | 24 | - | - | MD <b>3.05 lower</b><br>(5.67 lower to 0.43 lower)<br><br><b>Favors paraffin</b> |
| <b>AUSCAN function at 12 wks (0-36, lower scores indicate improvement)</b> |                      |             |             |                      |      |                            |    |    |   |   |                                                                                  |
| 46<br>(1 RCT)                                                              | serious <sup>a</sup> | not serious | not serious | serious <sup>b</sup> | none | ⊕⊕○○<br>LOW                | 22 | 24 | - | - | MD <b>4.02 lower</b><br>(8.53 lower to 0.49 higher)                              |

**CI:** Confidence interval; **MD:** Mean difference

## Explanations

- Patients not blinded
- Small study with wide 95% CI

**Table 2. RCT data not suitable for effect size calculation or combining with other data**

| Ref ID, Author, year   | Study type | Duration | Population Description                                   | Treatment given to relevant population | Results                                                                                                                                                             |
|------------------------|------------|----------|----------------------------------------------------------|----------------------------------------|---------------------------------------------------------------------------------------------------------------------------------------------------------------------|
| Refid 3435 Dilek, 2013 | RCT        | 12 weeks | 56 patients with hand OA , 46 included in final analysis | Paraffin bath/UC vs UC                 | All data are reported as median (25% to 75%)<br><br><b>Pain at rest VAS (0 to 10 cm scale, higher worse)</b><br>Paraffin group (24)<br>Baseline 5.00 (4.00 to 5.00) |

| Ref ID, Author, year | Study type | Duration | Population Description | Treatment given to relevant population | Results                                                                                                                                                                                                                                                                                                                                                                                                                                                                                                                                                                                                                                                                                                                                                                                                                                                                                                                                                                                                                                                                                                                                                                                                                                                                                                                                                                                                           |
|----------------------|------------|----------|------------------------|----------------------------------------|-------------------------------------------------------------------------------------------------------------------------------------------------------------------------------------------------------------------------------------------------------------------------------------------------------------------------------------------------------------------------------------------------------------------------------------------------------------------------------------------------------------------------------------------------------------------------------------------------------------------------------------------------------------------------------------------------------------------------------------------------------------------------------------------------------------------------------------------------------------------------------------------------------------------------------------------------------------------------------------------------------------------------------------------------------------------------------------------------------------------------------------------------------------------------------------------------------------------------------------------------------------------------------------------------------------------------------------------------------------------------------------------------------------------|
|                      |            |          |                        |                                        | <p>3 wk. (end of treatment) 2.00 (0.00 to 4.00)<br/> 12 wk. (end of study) 0.00 (0.00 to 3.00)<br/> Control (22)<br/> Baseline 4.00 (3.00 to 8.00)<br/> 3 wk. (end of treatment) 4.00 (3.00 to 5.00)<br/> 12 wk. (end of study) 5.00 (1.00 to 6.00)</p> <p><b>Pain during ADL VAS (0 to 10 cm scale, higher worse)</b><br/> Paraffin group (24)<br/> Baseline 7.00 (7.00 to 9.00)<br/> 3 wk. (end of treatment) 5.00 (3.00 to 6.00)<br/> 12 wk. (end of study) 5.00 (3.00 to 6.50)<br/> Control (22)<br/> Baseline 8.00 (6.00 to 8.00)<br/> 3 wk. (end of treatment) 7.00 (5.00 to 8.00)<br/> 12 wk. (end of study) 7.00 (5.00 to 8.00)</p> <p><b>Grip strength (JAMAR dynamometer) right (dominant hand in all cases) hand</b><br/> Paraffin group (24)<br/> Baseline 18.00 (14.66 to 24.66)<br/> 3 wk. (end of treatment) 18.00 (15.33 to 22.66)<br/> 12 wk. (end of study) 20.00 (14.66 to 23.33)<br/> Control (22)<br/> Baseline 16.66 (11.33 to 22.66)<br/> 3 wk. (end of treatment) 16.00 (12.60 to 20.66)<br/> 12 wk. (end of study) 13.33 (10.00 to 18.66)</p> <p><b>Grip strength (JAMAR dynamometer) left hand</b><br/> Paraffin group (24)<br/> Baseline 18.00 (14.00 to 21.33)<br/> 3 wk. (end of treatment) 17.33 (15.00 to 22.00)<br/> 12 wk. (end of study) 18.00 (14.66 to 22.00)<br/> Control (22)<br/> Baseline 15.33 (12.66 to 21.00)<br/> 3 wk. (end of treatment) 16.66 (12.00 to 20.66)</p> |



| Ref ID, Author, year      | Study type | Duration | Population Description   | Treatment given to relevant population                              | Results                                                                                                                                                                                                                                                                                                                                                                                                                                                                                                                                                                                                                                                                                                                                                                                                                                                                                                                                                                                                                                                         |
|---------------------------|------------|----------|--------------------------|---------------------------------------------------------------------|-----------------------------------------------------------------------------------------------------------------------------------------------------------------------------------------------------------------------------------------------------------------------------------------------------------------------------------------------------------------------------------------------------------------------------------------------------------------------------------------------------------------------------------------------------------------------------------------------------------------------------------------------------------------------------------------------------------------------------------------------------------------------------------------------------------------------------------------------------------------------------------------------------------------------------------------------------------------------------------------------------------------------------------------------------------------|
|                           |            |          |                          |                                                                     | <p>12 wk. (end of study) 12.00 (9.33 to 18.00)</p> <p><b>Pinch strength (kg) right hand chuck pinch</b><br/> Paraffin group (24)<br/> Baseline 4.33 (3.50 to 5.50)<br/> 3 wk. (end of treatment) 4.50 (3.66 to 6.00)<br/> 12 wk. (end of study) 5.33 (3.33 to 6.33)<br/> Control (22)<br/> Baseline 5.16 (3.83 to 6.33)<br/> 3 wk. (end of treatment) 4.33 (3.00 to 5.83)<br/> 12 wk. (end of study) 3.66 (2.66 to 5.33)<br/> The authors also reported data for lateral pinch (p value significant) and pulp to pulp pinch (p value not significant)</p> <p><b>Pinch strength (kg) left hand chuck pinch</b><br/> Paraffin group (24)<br/> Baseline 4.66 (3.33 to 6.00)<br/> 3 wk. (end of treatment) 4.33 (3.83 to 5.50)<br/> 12 wk. (end of study) 4.83 (3.50 to 6.16)<br/> Control (22)<br/> Baseline 4.83 (3.50 to 5.16)<br/> 3 wk. (end of treatment) 4.50 (3.00 to 5.66)<br/> 12 wk. (end of study) 3.66 (2.60 to 5.00)<br/> The authors also reported data for lateral pinch (p value significant) and pulp to pulp pinch (p value not significant)</p> |
| 9152 Aksoy and Altan 2018 | RCT        | 6 weeks  | 61 patients with hand OA | Paraffin therapy + home-based exercise vs home-based exercise alone | <p><b>VAS pain</b><br/> Median at 6 weeks: -3 vs. -0.6, p&lt;0.001, favors paraffin</p> <p><b>AUSCAN</b><br/> Median at 6 weeks: -4 vs. -1, p&lt;0.001, favors paraffin</p> <p><b>HAQ</b><br/> Median at 6 weeks: -0.45 vs. 0.00, p&lt;0.001, favors paraffin</p> <p><b>Hand grip strength (kg)</b><br/> Median at 6 weeks: 1.96 vs. 0.45, p=0.026, favors paraffin</p> <p><b>Pinch strength (kg)</b><br/> Median at 6 weeks: 1.09 vs. 0.21, p=0.012, favors paraffin</p>                                                                                                                                                                                                                                                                                                                                                                                                                                                                                                                                                                                       |

## References

1. Dilek B, Gozum M, Sahin E, Baydar M, Ergor G, El O, et al. Efficacy of paraffin bath therapy in hand osteoarthritis: a single-blinded randomized controlled trial. Arch Phys Med Rehabil. 2013;94(4):642-649.
2. Aksoy M, Altan L. Short-term efficacy of paraffin therapy and home-based exercise programs in the treatment of symptomatic hand osteoarthritis. Turk J Phys Med Rehab 2018;64(2):108-113

### PICO 32. Therapeutic heat/usual care compared to usual care for hand OA

**Summary.** One RCT addressed this comparison for 90 patients with hand OA. Stange-Rezende et al.<sup>[1]</sup> randomized patients to heat therapy using infrared radiation in a tiled stove room, three times a week for three weeks, plus usual care versus usual care as the control. VAS pain did not show a significant between-group difference in improvement, while AUSCAN pain showed a significant improvement favoring heat therapy over usual care. AUSCAN function and grip strength did not show significant between-group differences.

Quality of evidence for all critical outcomes: Low

| <b>PICO 32 therapeutic heat/UC compared to UC for hand OA</b>                     |                      |                      |                     |                      |                         |                                      |                              |                                 |                                 |                                     |                                                 |
|-----------------------------------------------------------------------------------|----------------------|----------------------|---------------------|----------------------|-------------------------|--------------------------------------|------------------------------|---------------------------------|---------------------------------|-------------------------------------|-------------------------------------------------|
| <b>Certainty assessment</b>                                                       |                      |                      |                     |                      |                         |                                      | <b>Summary of findings</b>   |                                 |                                 |                                     |                                                 |
| <b>Nº of participants (studies) Follow-up</b>                                     | <b>Risk of bias</b>  | <b>Inconsistency</b> | <b>Indirectness</b> | <b>Imprecision</b>   | <b>Publication bias</b> | <b>Overall certainty of evidence</b> | <b>Study event rates (%)</b> |                                 | <b>Relative effect (95% CI)</b> | <b>Anticipated absolute effects</b> |                                                 |
|                                                                                   |                      |                      |                     |                      |                         |                                      | <b>With UC</b>               | <b>With therapeutic heat/UC</b> |                                 | <b>Risk with UC</b>                 | <b>Risk difference with therapeutic heat/UC</b> |
| <b>pain in hands VAS, change score (0-100, lower scores indicate improvement)</b> |                      |                      |                     |                      |                         |                                      |                              |                                 |                                 |                                     |                                                 |
| 90 (1 RCT)                                                                        | serious <sup>a</sup> | not serious          | serious             | serious <sup>b</sup> | none                    | ⊕○○○<br>VERY LOW                     | 45                           | 45                              | -                               | -                                   | MD <b>1.7 lower</b> (9.31 lower to 5.91 higher) |

## PICO 32 therapeutic heat/UC compared to UC for hand OA

| Certainty assessment                                                            |                      |             |             |                      |      | Summary of findings |    |    |   |   |                                                                      |
|---------------------------------------------------------------------------------|----------------------|-------------|-------------|----------------------|------|---------------------|----|----|---|---|----------------------------------------------------------------------|
| <b>AUSCAN pain, change score, (0-20, higher scores indicate improvement)</b>    |                      |             |             |                      |      |                     |    |    |   |   |                                                                      |
| 90<br>(1 RCT)                                                                   | serious <sup>a</sup> | not serious | not serious | serious <sup>b</sup> | none | ⊕⊕○○<br>LOW         | 45 | 45 | - | - | MD <b>0.95 higher</b><br>(0 to 1.9 higher)<br><br><b>Favors heat</b> |
| <b>AUSCAN function, change score (0-36, higher scores indicate improvement)</b> |                      |             |             |                      |      |                     |    |    |   |   |                                                                      |
| 90<br>(1 RCT)                                                                   | serious <sup>a</sup> | not serious | not serious | serious <sup>b</sup> | none | ⊕⊕○○<br>LOW         | 45 | 45 | - | - | MD <b>0.76 lower</b><br>(2.32 lower to 0.8 higher)                   |
| <b>grip strength, change score, higher scores indicate improvement</b>          |                      |             |             |                      |      |                     |    |    |   |   |                                                                      |
| 90<br>(1 RCT)                                                                   | serious <sup>a</sup> | not serious | not serious | not serious          | none | ⊕⊕⊕○<br>MODERATE    | 45 | 45 | - | - | MD <b>0</b><br>(0.04 lower to 0.04 higher)                           |

**CI:** Confidence interval; **MD:** Mean difference

### Explanations

- a. Patients not blinded, randomization method and allocation concealment not reported
- b. Wide 95% CI that overlaps line of no effect
  - c. Unique intervention probably not reproducible in clinical practice

### References

1. Stange-Rezende L, Stamm TA, Schiffert T, Sahinbegovic E, Gaiger A, Smolen J, et al. Clinical study on the effect of infrared radiation of a tiled stove on patients with hand osteoarthritis. *Scand J Rheumatol.* 2006;35(6):476-480.

**PICO 33. Therapeutic cooling plus usual care compared to usual care in patients with hand OA**

Summary. The literature searches did not identify any studies that addressed this question.

Quality of evidence across all critical outcomes: Very low

**PICO 34. Patient education plus usual care compared to usual care for hand OA**

Summary. Two RCTs addressed this comparison in patients with hand OA.<sup>[1,2]</sup> One small low-quality RCT<sup>[1]</sup> found a significant reduction in hand pain during activity favoring education at the end of 10 weeks, but no significant difference in pain at rest or grip strength (Table 1). Imprecision in the effect estimates means that a between-group difference could not be ruled out. The remaining study<sup>[2]</sup> found no significant between-group difference in GAT scores at 6 months, but the finding is imprecise (Table 2). The high risk of bias and serious imprecision in this evidence base means that the quality of evidence is very low.

Quality of evidence across all critical outcomes: Very low

| <b>Table 1. PICO 34 patient education and UC compared to UC for hand OA</b>                                  |                     |                      |                     |                    |                         |                                      |                            |                                      |                                 |                                     |                                                      |
|--------------------------------------------------------------------------------------------------------------|---------------------|----------------------|---------------------|--------------------|-------------------------|--------------------------------------|----------------------------|--------------------------------------|---------------------------------|-------------------------------------|------------------------------------------------------|
| <b>Certainty assessment</b>                                                                                  |                     |                      |                     |                    |                         |                                      | <b>Summary of findings</b> |                                      |                                 |                                     |                                                      |
| <b>Nº of participants (studies) Follow-up</b>                                                                | <b>Risk of bias</b> | <b>Inconsistency</b> | <b>Indirectness</b> | <b>Imprecision</b> | <b>Publication bias</b> | <b>Overall certainty of evidence</b> | <b>Number of patients</b>  |                                      | <b>Relative effect (95% CI)</b> | <b>Anticipated absolute effects</b> |                                                      |
|                                                                                                              |                     |                      |                     |                    |                         |                                      | <b>With UC for hand OA</b> | <b>With patient education and UC</b> |                                 | <b>Risk with UC for hand OA</b>     | <b>Risk difference with patient education and UC</b> |
| <b>VAS pain at rest at the end of the treatment period, change score (lower scores indicate improvement)</b> |                     |                      |                     |                    |                         |                                      |                            |                                      |                                 |                                     |                                                      |

**Table 1. PICO 34 patient education and UC compared to UC for hand OA**

| Certainty assessment                                                                                                      |                           |             |             |                      |      | Summary of findings   |    |    |   |   |                                                                                  |
|---------------------------------------------------------------------------------------------------------------------------|---------------------------|-------------|-------------|----------------------|------|-----------------------|----|----|---|---|----------------------------------------------------------------------------------|
| 30<br>(1 RCT)                                                                                                             | very serious <sup>a</sup> | not serious | not serious | serious <sup>b</sup> | none | ⊕○○○<br>○<br>VERY LOW | 11 | 19 | - | - | MD <b>1.77 lower</b><br>(4.83 lower to 1.29 higher)                              |
| <b>VAS hand pain during activity at the end of the treatment period, change score (lower scores indicate improvement)</b> |                           |             |             |                      |      |                       |    |    |   |   |                                                                                  |
| 30<br>(1 RCT)                                                                                                             | very serious <sup>a</sup> | not serious | not serious | serious <sup>b</sup> | none | ⊕○○○<br>○<br>VERY LOW | 11 | 19 | - | - | MD <b>3.29 lower</b><br>(5.3 lower to 1.28 lower)<br><br><b>Favors education</b> |
| <b>grip strength at the end of treatment for the right hand, change score (higher scores indicate improvement)</b>        |                           |             |             |                      |      |                       |    |    |   |   |                                                                                  |
| 30<br>(1 RCT)                                                                                                             | very serious <sup>a</sup> | not serious | not serious | serious <sup>b</sup> | none | ⊕○○○<br>○<br>VERY LOW | 11 | 19 | - | - | MD <b>0.85 higher</b><br>(3.22 lower to 4.92 higher)                             |
| <b>grip strength at the end of treatment for the left hand, change score (higher scores indicate improvement)</b>         |                           |             |             |                      |      |                       |    |    |   |   |                                                                                  |

| Table 1. PICO 34 patient education and UC compared to UC for hand OA |                           |             |             |                      |      |                       |                     |    |   |   |                                                      |
|----------------------------------------------------------------------|---------------------------|-------------|-------------|----------------------|------|-----------------------|---------------------|----|---|---|------------------------------------------------------|
| Certainty assessment                                                 |                           |             |             |                      |      |                       | Summary of findings |    |   |   |                                                      |
| 30<br>(1 RCT)                                                        | very serious <sup>a</sup> | not serious | not serious | serious <sup>b</sup> | none | ⊕○○○<br>○<br>VERY LOW | 11                  | 19 | - | - | MD <b>3.69 higher</b><br>(0.37 lower to 7.75 higher) |

CI: Confidence interval; MD: Mean difference

## Explanations

a. No blinding of patients, providers or outcome assessors, randomization method and allocation concealment not reported

b. Small study with wide 95% CI

Table 2. RCT data not suitable for effect size calculation or combining with other data

| Ref ID, Author, year  | Study type       | Duration | Population Description                 | Treatment given to relevant population | Results                                                                                                                                                                                                                                                                                                                                                                                                                                                                                                         |
|-----------------------|------------------|----------|----------------------------------------|----------------------------------------|-----------------------------------------------------------------------------------------------------------------------------------------------------------------------------------------------------------------------------------------------------------------------------------------------------------------------------------------------------------------------------------------------------------------------------------------------------------------------------------------------------------------|
| 2221<br>Hansson, 2010 | Single-blind RCT | 6 months | 114 patients with knee, hip or hand OA | Education/UC vs UC                     | <p>Baseline data reported as mean and SD but 6 month followup data is reported as mean change, no SD provided. All patients had all tests so some without hand OA took this test too. Reported as ITT.</p> <p><b>GAT (high scores correspond to decreased hand function)</b><br/>           Education/UC (n=61)<br/>           Baseline 22.87 (SD 10.09)<br/>           6 month mean change -1.52<br/>           UC (n=53)<br/>           Baseline 24.67 (SD 7.83)<br/>           6-month mean change -1.69</p> |

## References

1. Garfinkel MS, Schumacher HR, Jr., Husain A, Levy M, Reshetar RA. Evaluation of a yoga based regimen for treatment of osteoarthritis of the hands. J Rheumatol. 1994;21(12):2341-2343.

2. Hansson EE, Jonsson-Lundgren M, Ronnheden AM, Sorensson E, Bjarnung A, Dahlberg LE. Effect of an education programme for patients with osteoarthritis in primary care--a randomized controlled trial. BMC Musculoskelet Disord. 2010;11:244.

**PICO 35. Occupational therapy (OT)/hand therapy plus UC compared to UC for hand OA**

Summary. The literature search identified four RCTs that addressed this comparison.<sup>[1-4]</sup> One study found a significant between-group difference in VAS pain favoring OT at 2 to 3 months, but a second study found no between-group difference.<sup>[1,4]</sup> Two studies measuring pain using AUSCAN did not find a significant difference at 3 months.<sup>[1,2]</sup> However, the same two studies did find a significant between-group difference in AUSCAN function favoring OT at 3 months. None of the studies found a significant between-group difference in COPM performance, pinch strength or grip strength, but these findings were inconclusive due to wide 95% CIs around the summary effect estimates.

Quality of evidence across all critical outcomes: Low

| <b>PICO 35 OT/hand therapy plus UC compared to UC for hand OA</b>            |                      |                      |                     |                    |                         |                                      |                            |                                     |                                 |                                     |                                                      |
|------------------------------------------------------------------------------|----------------------|----------------------|---------------------|--------------------|-------------------------|--------------------------------------|----------------------------|-------------------------------------|---------------------------------|-------------------------------------|------------------------------------------------------|
| <b>Certainty assessment</b>                                                  |                      |                      |                     |                    |                         |                                      | <b>Summary of findings</b> |                                     |                                 |                                     |                                                      |
| <b>Nº of participants (studies) Follow-up</b>                                | <b>Risk of bias</b>  | <b>Inconsistency</b> | <b>Indirectness</b> | <b>Imprecision</b> | <b>Publication bias</b> | <b>Overall certainty of evidence</b> | <b>Number of patients</b>  |                                     | <b>Relative effect (95% CI)</b> | <b>Anticipated absolute effects</b> |                                                      |
|                                                                              |                      |                      |                     |                    |                         |                                      | <b>With UC</b>             | <b>With OT/hand therapy plus UC</b> |                                 | <b>Risk with UC</b>                 | <b>Risk difference with OT/hand therapy plus UC</b>  |
| <b>pain VAS at 2 to 3 month followup (lower scores indicate improvement)</b> |                      |                      |                     |                    |                         |                                      |                            |                                     |                                 |                                     |                                                      |
| 130 (2 RCTs)                                                                 | serious <sup>a</sup> | not serious          | not serious         | serious            | none                    | ⊕⊕○○<br>LOW                          | 65                         | 65                                  | -                               | -                                   | <b>SMD 5.63 lower</b><br>(16.5 lower to 5.24 higher) |
| <b>AUSCAN pain at 3 months (0-20, lower scores indicate improvement)</b>     |                      |                      |                     |                    |                         |                                      |                            |                                     |                                 |                                     |                                                      |

| <b>PICO 35 OT/hand therapy plus UC compared to UC for hand OA</b>                       |                      |             |             |                      |      |                  |                            |     |   |   |                                                                            |
|-----------------------------------------------------------------------------------------|----------------------|-------------|-------------|----------------------|------|------------------|----------------------------|-----|---|---|----------------------------------------------------------------------------|
| <b>Certainty assessment</b>                                                             |                      |             |             |                      |      |                  | <b>Summary of findings</b> |     |   |   |                                                                            |
| 216<br>(2 RCTs)                                                                         | serious <sup>b</sup> | not serious | not serious | not serious          | none | ⊕⊕⊕○<br>MODERATE | 107                        | 109 | - | - | MD <b>0.12 lower</b><br>(0.52 lower to 0.28 higher)                        |
| <b>AUSCAN function at 3 months (0-36, lower scores indicate improvement)</b>            |                      |             |             |                      |      |                  |                            |     |   |   |                                                                            |
| 216<br>(2 RCTs)                                                                         | serious <sup>b</sup> | not serious | not serious | not serious          | none | ⊕⊕⊕○<br>MODERATE | 107                        | 109 | - | - | MD <b>0.49 lower</b><br>(0.84 lower to 0.15 lower)<br><br><b>Favors OT</b> |
| <b>tip pinch strength at 2 months, post scores (higher scores indicate improvement)</b> |                      |             |             |                      |      |                  |                            |     |   |   |                                                                            |
| 60<br>(1 RCT)                                                                           | not serious          | not serious | not serious | not serious          | none | ⊕⊕⊕⊕<br>HIGH     | 30                         | 30  | - | - | MD <b>0</b><br>(0.1 lower to 0.1 higher)                                   |
| <b>COPM performance/activity at 3 months</b>                                            |                      |             |             |                      |      |                  |                            |     |   |   |                                                                            |
| 217<br>(2 RCTs)                                                                         | serious <sup>b</sup> | not serious | not serious | serious <sup>c</sup> | none | ⊕⊕○○<br>LOW      | 107                        | 110 | - | - | MD <b>1 higher</b><br>(1.65 lower to 3.64 higher)                          |
| <b>grip strength at 2 to 3 months</b>                                                   |                      |             |             |                      |      |                  |                            |     |   |   |                                                                            |
| 206<br>(2 RCTs)                                                                         | serious <sup>b</sup> | not serious | not serious | serious <sup>c</sup> | none | ⊕⊕○○<br>LOW      | 102                        | 104 | - | - | MD <b>0.4 lower</b><br>(2.9 lower to 2.09 higher)                          |

CI: Confidence interval; COPM: Canadian occupational performance measure; MD: Mean difference

## Explanations



- a. Patients and providers not blinded in one study
- b. Patients and providers not blinded in both studies
- c. Wide 95% CI that overlaps line of no effect

## References

1. Kjekken I, Darre S, Smedslund G, Hagen KB, Nossun R. Effect of assistive technology in hand osteoarthritis: a randomised controlled trial. *Ann Rheum Dis*. 2011;70(8):1447-1452.
2. Stukstette MJ, Dekker J, den Broeder AA, Westeneng JM, Bijlsma JW, van den Ende CH. No evidence for the effectiveness of a multidisciplinary group based treatment program in patients with osteoarthritis of hands on the short term; results of a randomized controlled trial. *Osteoarthritis Cartilage*. 2013;21(7):901-910.
3. Villafane JH, Silva GB, Fernandez-Carnero J. Effect of thumb joint mobilization on pressure pain threshold in elderly patients with thumb carpometacarpal osteoarthritis. *J Manipulative Physiol Ther*. 2012;35(2):110-120.
4. Villafane JH, Cleland JA, Fernandez-de-Las-Penas C. The effectiveness of a manual therapy and exercise protocol in patients with thumb carpometacarpal osteoarthritis: a randomized controlled trial. *J Orthop Sports Phys Ther*. 2013;43(4):204-213.

### **PICO 36. Acupuncture plus usual care compared to usual care in patients with hand OA**

Summary. The literature searches did not identify any studies that addressed this question.

Quality of evidence across all critical outcomes: Very low

### **PICO 37. Digital orthosis plus usual care compared to usual care in patients with hand OA**

Summary. The literature searches did not identify any studies that addressed this question.

Quality of evidence across all critical outcomes: Very low

### **PICO 38. Glove plus usual care compared to usual care in patients with hand OA**

Summary. The literature searches identified one systematic review that evaluated 4 randomized crossover studies that indirectly addressed this question. The studies compared compression gloves to placebo gloves. The evidence is indirect because the majority of the 74 patients had RA; only 5 patients had hand OA. For these 5 patients, no significant between-group differences were found for nocturnal pain, stiffness, overall arthritis/health assessment, or grip strength (numbers not reported).

Quality of evidence across all critical outcomes: Very low

**Table 1. SR data not suitable for effect size calculation or combining with other data**

| Ref ID, Author, year | Study type                                          | Duration                          | Population Description                            | Treatment given to relevant population | Results                                                                                                                                                                                      |
|----------------------|-----------------------------------------------------|-----------------------------------|---------------------------------------------------|----------------------------------------|----------------------------------------------------------------------------------------------------------------------------------------------------------------------------------------------|
| 2835 Hammond 2016    | Systematic review of 4 randomized crossover studies | Range 2 to 8 weeks across studies | Most patients had RA; only 5 patients had hand OA | Compression gloves vs. placebo gloves  | For hand OA patients (n=5): No significant between-group differences were found for nocturnal pain, stiffness, overall arthritis/health assessment, or grip strength (numbers not reported). |

## References

1. Hammond A, Jones V, Prior Y. The effects of compression gloves on hand symptoms and hand function in rheumatoid arthritis and hand osteoarthritis: a systematic review. Clin Rehab. 2016;30(3):213-224.

### **PICO 39. Strengthening exercises compared to stretching/ROM exercises in patients with hand OA**

Summary. The literature searches did not identify any studies that addressed this question.

Quality of evidence across all critical outcomes: Very low

### **PICO 40. HCQ plus NSAIDs plus usual care compared to oral NSAIDs for symptomatic erosive hand OA**

Summary. The literature searches identified two double-blind multicenter RCTs<sup>[1,2]</sup> that indirectly addressed this question. HCQ (200 to 400 mg daily) showed no significant benefit over placebo for any pain and function outcomes at 6 to 12 months of follow-up. Serious adverse events did not differ significantly between HCQ and placebo. Because HCQ showed no benefit over placebo, and NSAIDs are known to be effective for pain relief, we did not downgrade the quality of the evidence for indirectness.

Quality of evidence across all critical outcomes: Moderate

| <b>HCQ compared to placebo for Hand OA for Hand OA</b><br>Bibliography: . HCQ versus No Treatment for Hand OA. Cochrane Database of Systematic Reviews [Year], Issue [Issue]. |              |               |              |                      |                  |                               |                          |          |                          |                               |                                                      |
|-------------------------------------------------------------------------------------------------------------------------------------------------------------------------------|--------------|---------------|--------------|----------------------|------------------|-------------------------------|--------------------------|----------|--------------------------|-------------------------------|------------------------------------------------------|
| Certainty assessment                                                                                                                                                          |              |               |              |                      |                  |                               | Summary of findings      |          |                          |                               |                                                      |
| Nº of participants (studies) Follow-up                                                                                                                                        | Risk of bias | Inconsistency | Indirectness | Imprecision          | Publication bias | Overall certainty of evidence | Study event rates (%)    |          | Relative effect (95% CI) | Anticipated absolute effects  |                                                      |
|                                                                                                                                                                               |              |               |              |                      |                  |                               | With placebo for Hand OA | With HCQ |                          | Risk with placebo for Hand OA | Risk difference with HCQ                             |
| <b>VAS or NRS (6 months)</b>                                                                                                                                                  |              |               |              |                      |                  |                               |                          |          |                          |                               |                                                      |
| 428 (2 RCTs)                                                                                                                                                                  | not serious  | not serious   | not serious  | serious <sup>a</sup> | none             | ⊕⊕⊕○<br>MODERATE              | 217                      | 211      | -                        | -                             | SMD <b>0.02 lower</b><br>(0.21 lower to 0.17 higher) |
| <b>VAS pain at 12 months</b>                                                                                                                                                  |              |               |              |                      |                  |                               |                          |          |                          |                               |                                                      |
| 232 (1 RCT)                                                                                                                                                                   | not serious  | not serious   | not serious  | serious <sup>a</sup> | none             | ⊕⊕⊕○<br>MODERATE              | 119                      | 113      | -                        | -                             | SMD <b>0.04 lower</b><br>(0.3 lower to 0.22 higher)  |
| <b>AUSCAN pain at 6 months</b>                                                                                                                                                |              |               |              |                      |                  |                               |                          |          |                          |                               |                                                      |
| 232 (1 RCT)                                                                                                                                                                   | not serious  | not serious   | not serious  | serious <sup>a</sup> | none             | ⊕⊕⊕○<br>MODERATE              | 119                      | 113      | -                        | -                             | MD <b>0.15 higher</b><br>(1 lower to 1.3 higher)     |
| <b>AUSCAN pain at 12 months</b>                                                                                                                                               |              |               |              |                      |                  |                               |                          |          |                          |                               |                                                      |

### HCQ compared to placebo for Hand OA for Hand OA

Bibliography: . HCQ versus No Treatment for Hand OA. Cochrane Database of Systematic Reviews [Year], Issue [Issue].

| Certainty assessment                           |             |             |             |                      |      |                  | Summary of findings |     |   |   |                                                      |
|------------------------------------------------|-------------|-------------|-------------|----------------------|------|------------------|---------------------|-----|---|---|------------------------------------------------------|
| 230<br>(1 RCT)                                 | not serious | not serious | not serious | serious <sup>a</sup> | none | ⊕⊕⊕○<br>MODERATE | 117                 | 113 | - | - | MD <b>0.54 higher</b><br>(0.63 lower to 1.71 higher) |
| <b>AUSCAN function at 6 months</b>             |             |             |             |                      |      |                  |                     |     |   |   |                                                      |
| 230<br>(1 RCT)                                 | not serious | not serious | not serious | serious <sup>a</sup> | none | ⊕⊕⊕○<br>MODERATE | 118                 | 112 | - | - | MD <b>0.32 higher</b><br>(1.69 lower to 2.33 higher) |
| <b>AUSCAN function at 12 months</b>            |             |             |             |                      |      |                  |                     |     |   |   |                                                      |
| 230<br>(1 RCT)                                 | not serious | not serious | not serious | serious <sup>a</sup> | none | ⊕⊕⊕○<br>MODERATE | 118                 | 112 | - | - | MD <b>0.98 higher</b><br>(1.06 lower to 3.02 higher) |
| <b>AUSCAN total score at 6 months</b>          |             |             |             |                      |      |                  |                     |     |   |   |                                                      |
| 196<br>(1 RCT)                                 | not serious | not serious | not serious | serious <sup>a</sup> | none | ⊕⊕⊕○<br>MODERATE | 98                  | 98  | - | - | MD <b>1.9 lower</b><br>(6.93 lower to 3.13 higher)   |
| <b>Grip strength at 12 months (right hand)</b> |             |             |             |                      |      |                  |                     |     |   |   |                                                      |

| <b>HCQ compared to placebo for Hand OA for Hand OA</b><br><b>Bibliography: . HCQ versus No Treatment for Hand OA. Cochrane Database of Systematic Reviews [Year], Issue [Issue].</b> |             |             |             |                      |      |                  |                     |                 |                                  |              |                                                     |
|--------------------------------------------------------------------------------------------------------------------------------------------------------------------------------------|-------------|-------------|-------------|----------------------|------|------------------|---------------------|-----------------|----------------------------------|--------------|-----------------------------------------------------|
| Certainty assessment                                                                                                                                                                 |             |             |             |                      |      |                  | Summary of findings |                 |                                  |              |                                                     |
| 208<br>(1 RCT)                                                                                                                                                                       | not serious | not serious | not serious | serious <sup>a</sup> | none | ⊕⊕⊕○<br>MODERATE | 103                 | 105             | -                                | -            | MD <b>0.95 lower</b><br>(3.28 lower to 1.38 higher) |
| <b>Serious adverse events</b>                                                                                                                                                        |             |             |             |                      |      |                  |                     |                 |                                  |              |                                                     |
| 232<br>(1 RCT)                                                                                                                                                                       | not serious | not serious | not serious | serious <sup>a</sup> | none | ⊕⊕⊕○<br>MODERATE | 8/119<br>(6.7%)     | 7/113<br>(6.2%) | <b>OR 0.92</b><br>(0.32 to 2.62) | 67 per 1,000 | <b>5 fewer per 1,000</b><br>(45 fewer to 92 more)   |

**CI:** Confidence interval; **SMD:** Standardised mean difference; **MD:** Mean difference; **OR:** Odds ratio

### Explanations

a. Wide 95% CI that overlaps with line of no effect

### References

1. Kingsbury SR, Tharmanathan P, Keding A, Ronaldson SJ, Grainger A, Wakefield RJ, et al. Hydroxychloroquine effectiveness in reducing symptoms of hand osteoarthritis Ann Int Med. 2018;168:385-395.
2. Lee W, Ruijgrok L, Boxma-de Klerk B, Kok MR, Kloppenburg M, Gerards A, et al. Efficacy of hydroxychloroquine in hand osteoarthritis: a randomized, double-blind, placebo-controlled trial. Arth Care Res. 2018;70:1320-1325.

### PICO 41. TNF/NSAID/UC compared to placebo plus oral NSAID for symptomatic erosive hand OA

Summary. Three RCTs indirectly address this question in 222 patients with erosive hand OA.<sup>[1-3]</sup> In one trial, patients were randomized to receive adalimumab 40 mg for two subcutaneous injections at a 15 day interval or placebo. Another trial was a randomized crossover trial where the order of treatment (adalimumab 40 mg or placebo) was randomized; all patients received the same treatments in different order for a 12 week

duration for each treatment. The third trial randomized patients to receive adalimumab 40 mg or placebo subcutaneously every 2 weeks for 52 weeks. All patients were considered refractory to NSAIDs, and although NSAIDs were allowed less than half of the patients in each group were using NSAIDs at baseline. In all trials there were no significant between-group differences for VAS pain, AUSCAN pain or function, FIHOA, Cochin score, or serious adverse events. However, for serious adverse events the findings were imprecise due to few events and a wide 95% CI around the effect sizes, meaning the possibility of a difference between groups in serious AEs could not be ruled out.

Quality of evidence across all critical outcomes: Moderate

| <b>TNF/NSAID/UC compared to placebo plus oral NSAID for erosive hand OA</b>                                 |                     |                      |                      |                    |                         |                                      |                                     |                          |                                 |                                          |                                                  |
|-------------------------------------------------------------------------------------------------------------|---------------------|----------------------|----------------------|--------------------|-------------------------|--------------------------------------|-------------------------------------|--------------------------|---------------------------------|------------------------------------------|--------------------------------------------------|
| <b>Certainty assessment</b>                                                                                 |                     |                      |                      |                    |                         |                                      | <b>Summary of findings</b>          |                          |                                 |                                          |                                                  |
| <b>Nº of participants (studies) Follow-up</b>                                                               | <b>Risk of bias</b> | <b>Inconsistency</b> | <b>Indirectness</b>  | <b>Imprecision</b> | <b>Publication bias</b> | <b>Overall certainty of evidence</b> | <b>Number of patients</b>           |                          | <b>Relative effect (95% CI)</b> | <b>Anticipated absolute effects</b>      |                                                  |
|                                                                                                             |                     |                      |                      |                    |                         |                                      | <b>With placebo plus oral NSAID</b> | <b>With TNF/NSAID/UC</b> |                                 | <b>Risk with placebo plus oral NSAID</b> | <b>Risk difference with TNF/NSAID/UC</b>         |
| <b>pain VAS at 12 to 26 wks, mean change from baseline score (0-100, lower scores indicate improvement)</b> |                     |                      |                      |                    |                         |                                      |                                     |                          |                                 |                                          |                                                  |
| 156 (2 RCTs)                                                                                                | not serious         | not serious          | serious <sup>a</sup> | not serious        | none                    | ⊕⊕⊕○<br>MODERATE                     | 76                                  | 80                       | -                               | -                                        | MD <b>1.95 lower</b> (9.83 lower to 5.93 higher) |
| <b>AUSCAN pain at 12 wks, mean change from baseline (0-500, lower scores indicate improvement)</b>          |                     |                      |                      |                    |                         |                                      |                                     |                          |                                 |                                          |                                                  |
| 81 (1 RCT)                                                                                                  | not serious         | not serious          | serious <sup>a</sup> | not serious        | none                    | ⊕⊕⊕○<br>MODERATE                     | 40                                  | 41                       | -                               | -                                        | MD <b>16 lower</b> (67.08 lower to 35.08 higher) |
| <b>AUSCAN function at 12 wks, mean change from baseline (0-900, lower scores indicate improvement)</b>      |                     |                      |                      |                    |                         |                                      |                                     |                          |                                 |                                          |                                                  |

| <b>TNF/NSAID/UC compared to placebo plus oral NSAID for erosive hand OA</b>                           |             |             |                      |                      |      |                  |                            |    |   |   |                                                        |
|-------------------------------------------------------------------------------------------------------|-------------|-------------|----------------------|----------------------|------|------------------|----------------------------|----|---|---|--------------------------------------------------------|
| <b>Certainty assessment</b>                                                                           |             |             |                      |                      |      |                  | <b>Summary of findings</b> |    |   |   |                                                        |
| 81<br>(1 RCT)                                                                                         | not serious | not serious | serious <sup>a</sup> | not serious          | none | ⊕⊕⊕○<br>MODERATE | 40                         | 41 | - | - | <b>MD 16.30 lower</b><br>(95.22 lower to 62.62 higher) |
| <b>AUSCAN pain at 52 wks, mean change from baseline (0-50, lower scores indicate improvement)</b>     |             |             |                      |                      |      |                  |                            |    |   |   |                                                        |
| 60<br>(1 RCT)                                                                                         | not serious | not serious | serious <sup>a</sup> | serious <sup>b</sup> | none | ⊕⊕○○<br>LOW      | 30                         | 30 | - | - | <b>MD 3.7 lower</b><br>(9.55 lower to 2.55 higher)     |
| <b>AUSCAN function at 52 wks, mean change from baseline (0-90, lower scores indicate improvement)</b> |             |             |                      |                      |      |                  |                            |    |   |   |                                                        |
| 60<br>(1 RCT)                                                                                         | not serious | not serious | serious <sup>a</sup> | serious <sup>b</sup> | none | ⊕⊕○○<br>LOW      | 30                         | 30 | - | - | <b>MD 0.8 higher</b><br>(8.41 lower to 10.01 higher)   |
| <b>FIHOA (0 to 30) at 26 wks, change score from baseline (lower scores indicate improvement)</b>      |             |             |                      |                      |      |                  |                            |    |   |   |                                                        |
| 77<br>(1 RCT)                                                                                         | not serious | not serious | serious <sup>a</sup> | not serious          | none | ⊕⊕⊕○<br>MODERATE | 37                         | 40 | - | - | <b>MD 0</b><br>(2.77 lower to 2.77 higher)             |
| <b>Cochin score at 26 wks, change from baseline (0-90, lower scores indicate improvement)</b>         |             |             |                      |                      |      |                  |                            |    |   |   |                                                        |
| 77<br>(1 RCT)                                                                                         | not serious | not serious | serious <sup>a</sup> | not serious          | none | ⊕⊕⊕○<br>MODERATE | 37                         | 40 | - | - | <b>MD 0.4 higher</b><br>(6.94 lower to 7.74 higher)    |
| <b>SAEs</b>                                                                                           |             |             |                      |                      |      |                  |                            |    |   |   |                                                        |

| TNF/NSAID/UC compared to placebo plus oral NSAID for erosive hand OA |             |             |                      |                      |      |             |                     |                |                                  |              |                                                    |
|----------------------------------------------------------------------|-------------|-------------|----------------------|----------------------|------|-------------|---------------------|----------------|----------------------------------|--------------|----------------------------------------------------|
| Certainty assessment                                                 |             |             |                      |                      |      |             | Summary of findings |                |                                  |              |                                                    |
| 162<br>(2 RCTs)                                                      | not serious | not serious | serious <sup>a</sup> | serious <sup>b</sup> | none | ⊕⊕○○<br>LOW | 2/79<br>(2.5%)      | 4/83<br>(4.8%) | <b>OR 2.13</b><br>(0.46 to 9.92) | 25 per 1,000 | <b>26 more per 1,000</b><br>(13 fewer to 192 more) |

**CI:** Confidence interval; **MD:** Mean difference; **OR:** Odds ratio

## Explanations

- NSAIDs were allowed but not assigned as part of treatment; not all patients in each group used NSAIDs (less than half were using NSAIDs at baseline).
- Wide 95% CI that overlaps line of no effect

## References

- Chevalier X, Ravaud P, Maheu E, Baron G, Rialland A, Vergnaud P, et al. Adalimumab in patients with hand osteoarthritis refractory to analgesics and NSAIDs: a randomised, multicentre, double-blind, placebo-controlled trial. *Ann Rheum Dis*. 2015;74(9):1697-1705.
- Aitken D, Laslett LL, Pan F, Haugen IK, Otahal P, Bellamy N et al. A randomised double-blind placebo-controlled crossover trial of HUMira (adalimumab) for erosive hand Osteoarthritis - the HUMOR trial. *Osteoarth Cart* 2018;26: 880-887.
- Verbruggen G, Wittoek R, Vander Cruyssen B, Elewaut D. Tumour necrosis factor blockade for the treatment of erosive osteoarthritis of the interphalangeal finger joints: a double blind, randomised trial on structure modification. *Ann Rheum Dis* 2012;71:891-898.

### PICO 42. Methotrexate plus NSAIDs plus usual care compared to oral NSAIDs for symptomatic erosive hand OA

Summary. The literature searches did not identify any studies that addressed this question.

Quality of evidence across all critical outcomes: Very low



**PICO 43. Interleukin-1 inhibitors plus NSAIDs plus usual care compared to oral NSAIDs**

Summary. The literature searches did not identify any studies that addressed this question.

Quality of evidence across all critical outcomes: Very low

**PICO 44. Intra-articular corticosteroids compared to usual care for 1<sup>st</sup> CMC OA**

Summary. The literature searches did not identify any studies that addressed this question.

Quality of evidence across all critical outcomes: Very low

**PICO 45. Iontophoresis plus usual care compared to intra-articular corticosteroids for 1<sup>st</sup> CMC OA**

Summary. The literature searches did not identify any studies that addressed this question.

Quality of evidence across all critical outcomes: Very low

**PICO 46. Rigid hand splint/UC compared to UC for 1st CMC (hand OA)**

Summary. Two RCTs addressed this comparison in 48 patients with OA in the first CMC joint.<sup>[1,2]</sup> Neither study found a significant between-group difference in any pain or function outcomes (see table below). However, the small sample size and wide 95% CIs around effect sizes resulted in serious imprecision, meaning that the possibility of a between-group difference cannot be ruled out.

When all splint studies were combined (including those from PICO 47 and 51), splints showed a significant benefit in VAS pain reduction over usual care at 4 to 12 weeks follow-up (4 RCTs) and 12 months follow-up (1 RCT). Significant differences favoring splints over usual care were also observed for DASH scores and pinch strength at 4 to 12 weeks follow-up.

Quality of evidence across all critical outcomes: Low

| <b>Rigid hand splint/UC compared to UC for 1st CMC (hand OA)</b>                                           |                      |                      |                     |                    |                         |                                      |                            |                                  |                                 |                                     |                                                                            |
|------------------------------------------------------------------------------------------------------------|----------------------|----------------------|---------------------|--------------------|-------------------------|--------------------------------------|----------------------------|----------------------------------|---------------------------------|-------------------------------------|----------------------------------------------------------------------------|
| <b>Certainty assessment</b>                                                                                |                      |                      |                     |                    |                         |                                      | <b>Summary of findings</b> |                                  |                                 |                                     |                                                                            |
| <b>Nº of participants (studies) Follow-up</b>                                                              | <b>Risk of bias</b>  | <b>Inconsistency</b> | <b>Indirectness</b> | <b>Imprecision</b> | <b>Publication bias</b> | <b>Overall certainty of evidence</b> | <b>Number of patients</b>  |                                  | <b>Relative effect (95% CI)</b> | <b>Anticipated absolute effects</b> |                                                                            |
|                                                                                                            |                      |                      |                     |                    |                         |                                      | <b>With UC</b>             | <b>With rigid hand splint/UC</b> |                                 | <b>Risk with UC</b>                 | <b>Risk difference with rigid hand splint/UC</b>                           |
| <b>pain VAS (4 to 12 wks) (0-10, lower scores indicate improvement)</b>                                    |                      |                      |                     |                    |                         |                                      |                            |                                  |                                 |                                     |                                                                            |
| 212 (4 RCTs)                                                                                               | serious <sup>a</sup> | not serious          | not serious         | not serious        | none                    | ⊕⊕⊕○<br>MODERATE                     | 97                         | 115                              | -                               | -                                   | MD <b>2.04 lower</b><br>(3.63 lower to 0.45 lower)<br><b>Favors splint</b> |
| <b>Pain VAS, mean change from baseline to 12 month followup (0-100, lower scores indicate improvement)</b> |                      |                      |                     |                    |                         |                                      |                            |                                  |                                 |                                     |                                                                            |

## Rigid hand splint/UC compared to UC for 1st CMC (hand OA)

| Certainty assessment                                                                            |                      |             |             |                      |      |                  | Summary of findings |    |   |   |                                                                                 |
|-------------------------------------------------------------------------------------------------|----------------------|-------------|-------------|----------------------|------|------------------|---------------------|----|---|---|---------------------------------------------------------------------------------|
| 97<br>(1 RCT)                                                                                   | serious <sup>a</sup> | not serious | not serious | not serious          | none | ⊕⊕⊕○<br>MODERATE | 45                  | 52 | - | - | MD <b>14.3 lower</b><br>(23.6 lower to 5 lower)<br><br><b>Favors splint</b>     |
| <b>pain on MHQ change from baseline to 4 wks (0-100, lower scores indicate improvement)</b>     |                      |             |             |                      |      |                  |                     |    |   |   |                                                                                 |
| 25<br>(1 RCT)                                                                                   | serious <sup>a</sup> | not serious | not serious | serious <sup>b</sup> | none | ⊕⊕○○<br>LOW      | 9                   | 16 | - | - | MD <b>2.01 lower</b><br>(18.85 lower to 14.83 higher)                           |
| <b>function on MHQ change from baseline to 4 wks (0-100, lower scores indicate improvement)</b> |                      |             |             |                      |      |                  |                     |    |   |   |                                                                                 |
| 25<br>(1 RCT)                                                                                   | serious <sup>a</sup> | not serious | not serious | serious <sup>b</sup> | none | ⊕⊕○○<br>LOW      | 9                   | 16 | - | - | MD <b>12.44 higher</b><br>(2.15 lower to 27.03 higher)                          |
| <b>DASH post treatment scores at 4 to 12 wks (0-100, lower scores indicate improvement)</b>     |                      |             |             |                      |      |                  |                     |    |   |   |                                                                                 |
| 86<br>(2 RCTs)                                                                                  | serious <sup>a</sup> | not serious | not serious | not serious          | none | ⊕⊕⊕○<br>MODERATE | 42                  | 44 | - | - | MD <b>7.45 lower</b><br>(12.40 lower to 2.50 lower)<br><br><b>Favors splint</b> |
| <b>grip strength at 4 to 12 wks post treatment scores (higher scores indicate improvement)</b>  |                      |             |             |                      |      |                  |                     |    |   |   |                                                                                 |
| 23<br>(1 RCT)                                                                                   | serious <sup>a</sup> | not serious | not serious | serious <sup>b</sup> | none | ⊕⊕○○<br>LOW      | 11                  | 12 | - | - | MD <b>0.7 higher</b><br>(1.05 lower to 2.45 higher)                             |

| Rigid hand splint/UC compared to UC for 1st CMC (hand OA)                                       |                      |             |             |                      |      |                     |    |    |   |   |                                                                               |
|-------------------------------------------------------------------------------------------------|----------------------|-------------|-------------|----------------------|------|---------------------|----|----|---|---|-------------------------------------------------------------------------------|
| Certainty assessment                                                                            |                      |             |             |                      |      | Summary of findings |    |    |   |   |                                                                               |
| <b>pinch strength post treatment scores at 4 to 12 wks (higher scores indicate improvement)</b> |                      |             |             |                      |      |                     |    |    |   |   |                                                                               |
| 148<br>(2 RCTs)                                                                                 | serious <sup>a</sup> | not serious | not serious | not serious          | none | ⊕⊕⊕○<br>MODERATE    | 68 | 80 | - | - | MD <b>1.96 higher</b><br>(1.56 higher to 2.36 higher)<br><b>Favors splint</b> |
| <b>pinch strength, mean change baseline to 12 months (higher scores indicate improvement)</b>   |                      |             |             |                      |      |                     |    |    |   |   |                                                                               |
| 96<br>(1 RCT)                                                                                   | serious <sup>a</sup> | not serious | not serious | serious <sup>c</sup> | none | ⊕⊕○○<br>LOW         | 46 | 50 | - | - | MD <b>9 higher</b><br>(11.53 lower to 29.53 higher)                           |

CI: Confidence interval; MD: Mean difference

## Explanations

- a. No blinding in one trial, patients not blinded in second trial, unclear if any blinding or allocation concealment in second trial
- b. Small study with wide 95% CI

## References

1. Bani MA, Arazpour M, Kashani RV, Mousavi ME, Hutchins SW. Comparison of custom-made and prefabricated neoprene splinting in patients with the first carpometacarpal joint osteoarthritis. *Disabil Rehabil Assist Technol.* 2013;8(3):232-237.
2. Arazpour M, Soflaei M, Ahmadi Bani M, Madani SP, Sattari M, Biglarian A, et al. The effect of thumb splinting on thenar muscles atrophy, pain, and function in subjects with thumb carpometacarpal joint osteoarthritis. *Prosthet Orthot Int.* 2017;41(4):379-386.

3. Rannou F, Dimet J, Boutron I, Baron G, Fayad F, Mace Y, et al. Splint for base-of-thumb osteoarthritis: a randomized trial. *Ann Intern Med.* 2009;150(10):661-669.
4. Gomes Carreira AC, Jones A, Natour J. Assessment of the effectiveness of a functional splint for osteoarthritis of the trapeziometacarpal joint on the dominant hand: a randomized controlled study. *J Rehabil Med.* 2010;42(5):469-474.

**PICO 47. Neoprene hand-base spica/UC compared to UC for 1<sup>st</sup> CMC (hand OA)**

Summary. Two RCTs addressed this comparison in 124 patients with OA of the 1<sup>st</sup> CMC joint.<sup>[1,2]</sup> One study found significantly greater improvement in VAS pain favoring the neoprene splint at one month follow-up, while the other did not find a significant between-group difference. The study that reported longer-term follow-up also found significant improvement favoring the neoprene splint at 12 months.<sup>[2]</sup> Both studies also found significant improvement in pinch strength favoring the splint over usual care at one month. The study with longer follow-up did not find a between-group difference in pinch strength at 12 months.<sup>[2]</sup> One study found an increase in DASH score favoring the splint at one month (the authors described this as an improvement) and found no significant between-group difference in grip strength at one month.<sup>[1]</sup> The non-significant findings were all imprecise due to wide 95% CIs around the effect sizes, which means the findings were inconclusive for those outcomes.

Quality of evidence across all critical outcomes: Low

| <b>PICO 47 Neoprene hand-base spica/UC compared to UC for 1st CMC (hand OA)</b>                            |                     |                      |                     |                    |                         |                                      |                            |                       |                                 |                                     |                                       |
|------------------------------------------------------------------------------------------------------------|---------------------|----------------------|---------------------|--------------------|-------------------------|--------------------------------------|----------------------------|-----------------------|---------------------------------|-------------------------------------|---------------------------------------|
| <b>Certainty assessment</b>                                                                                |                     |                      |                     |                    |                         |                                      | <b>Summary of findings</b> |                       |                                 |                                     |                                       |
| <b>Nº of participants (studies) Follow-up</b>                                                              | <b>Risk of bias</b> | <b>Inconsistency</b> | <b>Indirectness</b> | <b>Imprecision</b> | <b>Publication bias</b> | <b>Overall certainty of evidence</b> | <b>Number of patients</b>  |                       | <b>Relative effect (95% CI)</b> | <b>Anticipated absolute effects</b> |                                       |
|                                                                                                            |                     |                      |                     |                    |                         |                                      | <b>With UC</b>             | <b>With splint/UC</b> |                                 | <b>Risk with UC</b>                 | <b>Risk difference with splint/UC</b> |
| <b>Pain VAS, mean change from baseline to 12 month followup (0-100, lower scores indicate improvement)</b> |                     |                      |                     |                    |                         |                                      |                            |                       |                                 |                                     |                                       |

**PICO 47 Neoprene hand-base spica/UC compared to UC for 1st CMC (hand OA)**

| Certainty assessment                                                                          |                      |             |             |                      |      | Summary of findings |    |    |   |   |                                                                                   |
|-----------------------------------------------------------------------------------------------|----------------------|-------------|-------------|----------------------|------|---------------------|----|----|---|---|-----------------------------------------------------------------------------------|
| 97<br>(1 RCT)                                                                                 | serious <sup>a</sup> | not serious | not serious | not serious          | none | ⊕⊕⊕○<br>MODERATE    | 45 | 52 | - | - | MD <b>14.3 lower</b><br>(23.6 lower to 5 lower)<br><br><b>Favors splint</b>       |
| <b>pain VAS 1 month followup (0-100, lower scores indicate improvement)</b>                   |                      |             |             |                      |      |                     |    |    |   |   |                                                                                   |
| 124<br>(2 RCTs)                                                                               | serious <sup>a</sup> | not serious | not serious | serious <sup>b</sup> | none | ⊕⊕○○<br>LOW         | 57 | 67 | - | - | MD <b>15.32 lower</b><br>(47.26 lower to 16.62 higher)                            |
| <b>DASH at 1 month (post scores only) (0-100, lower scores indicate improvement)</b>          |                      |             |             |                      |      |                     |    |    |   |   |                                                                                   |
| 23<br>(1 RCT)                                                                                 | serious <sup>a</sup> | not serious | not serious | serious <sup>b</sup> | none | ⊕⊕○○<br>LOW         | 11 | 12 | - | - | MD <b>9.8 higher</b><br>(2.03 higher to 17.57 higher)<br><br><b>Favors splint</b> |
| <b>pinch strength, 1 month (higher scores indicate improvement)</b>                           |                      |             |             |                      |      |                     |    |    |   |   |                                                                                   |
| 125<br>(2 RCTs)                                                                               | serious <sup>a</sup> | not serious | not serious | not serious          | none | ⊕⊕⊕○<br>MODERATE    | 57 | 68 | - | - | MD <b>2.1 higher</b><br>(1.63 higher to 2.57 higher)<br><br><b>Favors splint</b>  |
| <b>pinch strength, mean change baseline to 12 months (higher scores indicate improvement)</b> |                      |             |             |                      |      |                     |    |    |   |   |                                                                                   |

| <b>PICO 47 Neoprene hand-base spica/UC compared to UC for 1st CMC (hand OA)</b>                       |                      |             |             |                      |      |             |                            |    |   |   |                                                     |
|-------------------------------------------------------------------------------------------------------|----------------------|-------------|-------------|----------------------|------|-------------|----------------------------|----|---|---|-----------------------------------------------------|
| <b>Certainty assessment</b>                                                                           |                      |             |             |                      |      |             | <b>Summary of findings</b> |    |   |   |                                                     |
| 96<br>(1 RCT)                                                                                         | serious <sup>a</sup> | not serious | not serious | serious <sup>c</sup> | none | ⊕⊕○○<br>LOW | 46                         | 50 | - | - | MD <b>9 higher</b><br>(11.53 lower to 29.53 higher) |
| <b>grip strength (post treatment scores) at 1 month followup (higher scores indicate improvement)</b> |                      |             |             |                      |      |             |                            |    |   |   |                                                     |
| 23<br>(1 RCT)                                                                                         | serious <sup>a</sup> | not serious | not serious | serious <sup>b</sup> | none | ⊕⊕○○<br>LOW | 11                         | 12 | - | - | MD <b>0.8 higher</b><br>(0.46 lower to 2.06 higher) |

**CI:** Confidence interval; **MD:** Mean difference

## Explanations

- a. Patients not blinded in either study, no blinding in one study
- b. Small study with wide 95% CI
- c. Wide 95% CI that overlaps line of no effect

## References

1. Bani MA, Arazpour M, Kashani RV, Mousavi ME, Hutchins SW. Comparison of custom-made and prefabricated neoprene splinting in patients with the first carpometacarpal joint osteoarthritis. *Disabil Rehabil Assist Technol.* 2013;8(3):232-237.
2. Rannou F, Dimet J, Boutron I, Baron G, Fayad F, Mace Y, et al. Splint for base-of-thumb osteoarthritis: a randomized trial. *Ann Intern Med.* 2009;150(10):661-669.

## PICO 48. Glove plus usual care compared to usual care for 1<sup>st</sup> CMC (hand OA)

Summary. The literature searches did not identify any studies that addressed this question.

Quality of evidence across all critical outcomes: Very low

**PICO 49. Kinesiotape plus usual care compared to usual care for 1<sup>st</sup> CMC (hand OA)**

Summary. The literature searches did not identify any studies that addressed this question.

Quality of evidence across all critical outcomes: Very low

**PICO 50. Orthosis plus usual care compared to kinesiotape for 1<sup>st</sup> CMC (hand OA)**

Summary. The literature searches did not identify any studies that addressed this question.

Quality of evidence across all critical outcomes: Very low

**PICO 51. Rigid cock-up splint/UC compared to UC for symptomatic wrist OA**

Summary. One RCT compared a functional thermoplastic splint plus usual care against usual care in 40 patients with OA of the TMC joint.<sup>[1]</sup> At 90 days follow-up, this study found significantly lower VAS pain favoring the splint over usual care. Measures of function (DASH, grip strength, and pinch strength) did not differ significantly between groups, but serious imprecision in the effect estimates means that the possibility of a between-group difference could not be ruled out.

Quality of evidence across all critical outcomes: Low

| <b>Functional splint/UC compared to UC for Symptomatic wrist OA</b> |                     |                      |                     |                    |                         |                                      |                            |                                  |                                 |                                     |                                                  |
|---------------------------------------------------------------------|---------------------|----------------------|---------------------|--------------------|-------------------------|--------------------------------------|----------------------------|----------------------------------|---------------------------------|-------------------------------------|--------------------------------------------------|
| <b>Certainty assessment</b>                                         |                     |                      |                     |                    |                         |                                      | <b>Summary of findings</b> |                                  |                                 |                                     |                                                  |
| <b>Nº of participants (studies) Follow-up</b>                       | <b>Risk of bias</b> | <b>Inconsistency</b> | <b>Indirectness</b> | <b>Imprecision</b> | <b>Publication bias</b> | <b>Overall certainty of evidence</b> | <b>Number of patients</b>  |                                  | <b>Relative effect (95% CI)</b> | <b>Anticipated absolute effects</b> |                                                  |
|                                                                     |                     |                      |                     |                    |                         |                                      | <b>With UC</b>             | <b>With functional splint/UC</b> |                                 | <b>Risk with UC</b>                 | <b>Risk difference with functional splint/UC</b> |
|                                                                     |                     |                      |                     |                    |                         |                                      |                            |                                  |                                 |                                     |                                                  |



## Functional splint/UC compared to UC for Symptomatic wrist OA

| Certainty assessment                                                                                                                 |                      |             |             |                      |      | Summary of findings |    |    |   |   |                                                                           |
|--------------------------------------------------------------------------------------------------------------------------------------|----------------------|-------------|-------------|----------------------|------|---------------------|----|----|---|---|---------------------------------------------------------------------------|
| <b>Pain VAS (0 to 10 cm, 0 no pain) average for past week without splint at 90 days followup (lower scores indicate improvement)</b> |                      |             |             |                      |      |                     |    |    |   |   |                                                                           |
| 40<br>(1 RCT)                                                                                                                        | serious <sup>a</sup> | not serious | not serious | not serious          | none | ⊕⊕⊕○<br>MODERATE    | 20 | 20 | - | - | MD <b>2.3 lower</b><br>(3.6 lower to 1 lower)<br><br><b>Favors splint</b> |
| <b>DASH at 90 day followup (0-100, function/symptoms/social) (lower scores indicate improvement)</b>                                 |                      |             |             |                      |      |                     |    |    |   |   |                                                                           |
| 40<br>(1 RCT)                                                                                                                        | serious <sup>a</sup> | not serious | not serious | serious <sup>b</sup> | none | ⊕⊕○○<br>LOW         | 20 | 20 | - | - | MD <b>6.7 lower</b><br>(16.48 lower to 3.08 higher)                       |
| <b>grip strength w/o splint at 90 day followup (higher scores indicate improvement)</b>                                              |                      |             |             |                      |      |                     |    |    |   |   |                                                                           |
| 40<br>(1 RCT)                                                                                                                        | serious <sup>a</sup> | not serious | not serious | serious <sup>b</sup> | none | ⊕⊕○○<br>LOW         | 20 | 20 | - | - | MD <b>0.8 higher</b><br>(3.07 lower to 4.67 higher)                       |
| <b>pinch strength 90 day followup for key pinch w/o splint (higher scores indicate improvement)</b>                                  |                      |             |             |                      |      |                     |    |    |   |   |                                                                           |
| 40<br>(1 RCT)                                                                                                                        | serious <sup>a</sup> | not serious | not serious | serious <sup>b</sup> | none | ⊕⊕○○<br>LOW         | 20 | 20 | - | - | MD <b>0.2 higher</b><br>(0.86 lower to 1.26 higher)                       |
| <b>pinch strength without splint at 90 day followup, tip pinch (higher scores indicate improvement)</b>                              |                      |             |             |                      |      |                     |    |    |   |   |                                                                           |

| Functional splint/UC compared to UC for Symptomatic wrist OA |                      |             |             |                      |      |                     |    |    |   |   |                                                     |
|--------------------------------------------------------------|----------------------|-------------|-------------|----------------------|------|---------------------|----|----|---|---|-----------------------------------------------------|
| Certainty assessment                                         |                      |             |             |                      |      | Summary of findings |    |    |   |   |                                                     |
| 40<br>(1 RCT)                                                | serious <sup>a</sup> | not serious | not serious | serious <sup>b</sup> | none | ⊕⊕○○<br>LOW         | 20 | 20 | - | - | MD <b>0.1 higher</b><br>(0.58 lower to 0.78 higher) |

**CI:** Confidence interval; **MD:** Mean difference

## Explanations

- a. Patients and providers not blinded
- b. Wide 95% CI that overlaps line of no effect

## References

1. Gomes Carreira AC, Jones A, Natour J. Assessment of the effectiveness of a functional splint for osteoarthritis of the trapeziometacarpal joint on the dominant hand: a randomized controlled study. *J Rehabil Med.* 2010;42(5):469-474.

### PICO 52. Neoprene cock-up splint/UC compared to UC for symptomatic wrist OA

Summary. The literature searches did not identify any studies that addressed this question.

Quality of evidence across all critical outcomes: Very low
