# Supplementary material
Source: PubMed Central journal article supplement (PMC10518852)
Supplement: NIHMS1921827-supplement-Apend_3.pdf [file NIHMS1921827-supplement-Apend_3.pdf]

## **SUPPLEMENTARY APPENDIX 3: Panel/Teams Involved**

### **ACR/AF 2019 Guideline for the Management of Osteoarthritis of the Hand, Hip and Knee**

#### **Core Leadership Team**

Sharon L. Kolasinski, MD, FACP, FACR (Penn Medicine, Philadelphia, PA; Project PI), James Reston, PhD, MPH (ECRI Institute, Plymouth Meeting, PA; Literature Review Team PI), Marc Hochberg, MD, MPH, MACP, MACR (University of Maryland School of Medicine, Baltimore, MD), Tuhina Neogi, MD, PhD, FRCPC (Boston University School of Medicine, Boston, MA), Carol Oatis, PT, PhD (Arcadia University, Glenside, PA), Gordon Guyatt, MD (McMaster University, Hamilton, Ontario, Canada; GRADE Consultant)

#### **Voting Panel**

Joel Block, MD (Rush University Medical Center, Chicago, IL), Leigh Callahan, PhD (University of North Carolina School of Medicine, Chapel Hill, NC), Cindy Copenhaver (South Holland Recreational Services, Ingalls Hospital, Holland, IL), Carole Dodge, OT, CHT (University of Michigan Medical Center, Ann Arbor, MI), David Felson, MD, MPH (Boston University School of Medicine, Boston, MA), Kathleen Gellar, William F. Harvey, MD, MSc, FACR (Tufts Medical Center, Boston, MA), Gillian Hawker, MD, MSc (University of Toronto, Toronto, Ontario, Canada), Edward Herzig, MD (Retired, Cincinnati, OH), C. Kent Kwoh, MD (University of Arizona College of Medicine, Tucson, AZ), Amanda E. Nelson, MD, MSCR, RhMSUS (University of North Carolina School of Medicine, Chapel Hill, NC), Jonathan Samuels, MD (NYU Langone Medical Center, New York, NY), Carla Scanzello, MD (University of Pennsylvania School of Medicine, Philadelphia, PA), Daniel White, PT, ScD (University of Delaware, Newark, DE), Barton Wise, MD, PhD (University of California Davis, Davis, CA)

#### **Literature Review Team**

Roy D. Altman, MD (UCLA Medical Center, Los Angeles, CA), Dana DiRenzo, MD (Johns Hopkins University School of Medicine, Baltimore, MD), Joann Fontanarosa, PhD (ECRI Institute, Plymouth

Meeting, PA), Gina Giradi (ECRI Institute, Plymouth Meeting, PA), Mariko Ishimori, MD (Cedars Sinai Medical Center, Los Angeles, CA) Devyani Misra, MD, MSc (Boston University School of Medicine, Boston, MA), Amit Aakash Shah, MD, MPH (American College of Rheumatology, Atlanta, GA), Anna K. Shmagel, MD, MS (Boston University School of Medicine, Boston, MA), Louise M. Thoma, PT, DPT, PhD (University of Delaware, Newark, DE), Marat Turgunbaev, MD, MPH (American College of Rheumatology, Atlanta, GA)

### **Expert Panel**

Nancy Baker ScD, MPH, OTR/I (University of Pittsburgh, Pittsburgh, PA), Yvonne Golightly, PT, MS, PhD (University of North Carolina, Chapel Hill, NC), Nancy Lane, MD (University of California Davis, Davis, CA), Richard Loeser, MD (University of North Carolina School of Medicine, Chapel Hill, NC), Anne-Marie Malfait, MD, PhD (Rush University Medical Center, Chicago, IL), Steve Messier, PhD (Wake Forest University, Winston-Salem, NC), Svetlana Krasnokutsky Samuels, MD (NYU Langone Medical Center, New York, NY), Thomas Schnitzer, MD, PhD (Northwestern University, Evanston, IL), Leena Sharma, MD (Northwestern University, Evanston, IL), Jasvinder Singh, MD, MPH (University of Alabama at Birmingham, Birmingham, AL), ChenChen Wang, MD, MSc (Tufts Medical Center, Boston, MA)
