# Supplementary material
Source: PubMed Central journal article supplement (PMC10518852)
Supplement: NIHMS1921827-supplement-Apend_4.pdf [file NIHMS1921827-supplement-Apend_4.pdf]

## SUPPLEMENTARY APPENDIX 4: Search Strategies

### ACR/AF 2019 Guideline for the Management of Osteoarthritis of the Hand, Hip and Knee

## OSTEOARTHRITIS

Original searches were run from inception of databases to 10/15/17. Updates were run from 10/15/17 to 8/1/18.

## PUBMED

| Syntax Guide for PubMed                                                                                                               |                                                                                                                                                                                                                                                                                                                                                           |
|---------------------------------------------------------------------------------------------------------------------------------------|-----------------------------------------------------------------------------------------------------------------------------------------------------------------------------------------------------------------------------------------------------------------------------------------------------------------------------------------------------------|
| [MeSH] = Medical Subject Heading                                                                                                      | [Text Word] = Includes all words and numbers in the title, abstract, other abstract, MeSH terms, MeSH Subheadings, Publication Types, Substance Names, Personal Name as Subject, Corporate Author, Secondary Source, Comment/Correction Notes, and Other Terms - typically non-MeSH subject terms (keywords)...assigned by an organization other than NLM |
| [MeSH subheading] = a Medical Subject Heading subheading, e.g. drug therapy                                                           | [Title/Abstract] = Includes words in the title and abstracts                                                                                                                                                                                                                                                                                              |
| mh:noexp = a command to retrieve the results of the Medical Subject Heading specified, but not narrower Medical Subject Heading terms |                                                                                                                                                                                                                                                                                                                                                           |
| Boolean Operators                                                                                                                     |                                                                                                                                                                                                                                                                                                                                                           |
| OR = retrieves results that include at least one of the search terms                                                                  | AND = retrieves results that include all the search terms                                                                                                                                                                                                                                                                                                 |
| NOT = excludes the retrieval of terms from the search                                                                                 |                                                                                                                                                                                                                                                                                                                                                           |

```
(((((("HIP"[MESH] OR HIP[TIAB] OR HIPS[TIAB] OR COXA[TIAB] OR COXAS[TIAB])) AND  
("OSTEOARTHRITIS"[MH:NOEXP] OR OSTEOARTHRITIS*[TIAB] OR OSTEOARTHRTIDES[TIAB] OR  
OSTEOARTHROSIS[TIAB] OR DEGENERATIVE ARTHRITIDES[TIAB] OR DEGENERATIVE ARTHRITIS[TIAB]) OR  
(NONINFLAMMATORY ARTHRITIS[TIAB] OR NON-INFLAMMATORY ARTHRITIS[TIAB] OR ARTHROSIS[TIAB]
```

OR DEGENERATIVE JOINT DISEASE\*[TIAB] OR OSTEO-ARTHRITIS[TIAB] OR OSTEO-ARTHROSIS[TIAB] OR OSTEOARTHROSIS[TIAB] OR RHEUMATOID ARTHROSIS[TIAB])) OR ("OSTEOARTHRITIS, HIP"[MESH] OR HIP OSTEOARTHRI\*[TIAB] OR COXARTH\*[TIAB])) OR (((("KNEE"[MESH] OR KNEE\*[TW]) AND ("OSTEOARTHRITIS"[MH:NOEXP] OR OSTEOARTHRITIS\*[TIAB] OR OSTEOARTHRIDES[TIAB] OR OSTEOARTHROSIS[TIAB] OR DEGENERATIVE ARTHRIDES[TIAB] OR DEGENERATIVE ARTHRITIS[TIAB]) OR (NONINFLAMMATORY ARTHRITIS[TIAB] OR NON-INFLAMMATORY ARTHRITIS[TIAB] OR ARTHROSIS[TIAB] OR DEGENERATIVE JOINT DISEASE\*[TIAB] OR OSTEO-ARTHRITIS[TIAB] OR OSTEO-ARTHROSIS[TIAB] OR OSTEOARTHROSIS[TIAB] OR RHEUMATOID ARTHROSIS[TIAB])) OR ("OSTEOARTHRITIS, KNEE"[MESH] OR KNEE OSTEOARTH\*[TIAB])) AND (ENGLISH[LANG])) NOT (EDITORIAL\*[PT] OR COMMENT\*[PT] OR LETTER\*[PT])) NOT (ANIMAL\*[MH] NOT (ANIMAL\*[MH] AND HUMAN\*[MH])) NOT (((("CHILD"[MESH] OR "ADOLESCENT"[MESH] OR "INFANT"[MESH]) NOT (((("CHILD"[MESH] OR "ADOLESCENT"[MESH] OR "INFANT"[MESH]) AND ("ADULT"[MESH])))) AND (((("MUSCLE STRENGTH"[MESH:NOEXP]) OR ("RESISTANCE TRAINING"[MESH] OR RESISTANCE TRAINING[TIAB] OR STRENGTH TRAINING[TIAB] OR STRENGTHEN\*[TIAB])) OR (AEROBICS\*[TIAB] OR AEROBIC EXERCISE\*[TIAB] OR AEROBIC ACTIVIT\*[TIAB] OR AEROBIC THERAP\*[TIAB]) OR ((NEUROMUSCULAR REEDUCATION[TIAB] OR NEURO-MUSCULAR REEDUCATION OR NEUROMUSCULAR RE-EDUCATION[TIAB] OR NEURO-MUSCULAR RE-EDUCATION[TIAB]) OR ((NEMEX\*[TIAB]) OR ((NEUROMUSCULAR[TIAB] OR NEURO-MUSCULAR[TIAB]) AND (TRAINING[TIAB] OR EXERCIS\*[TIAB])))) OR (((AQUATICS[TW]) OR AQUATIC EXERCISE\*[TIAB] OR AQUATIC ACTIVIT\*[TIAB] OR ("HYDROTHERAPY"[MESH] OR HYDROTHERAP\*[TIAB] OR WHIRLPOOL BATH\*[TIAB])) OR (KNEIPP THERAP\*[TIAB]) OR (WATER IMMERSION THERAP\*[TIAB])) OR ((BALANCE TRAINING[TIAB] OR BALANCE EXERCISE[TIAB] OR BALANCE RE-EDUCATION[TIAB] OR BALANCE REEDUCATION[TIAB]) OR ("CIRCUIT-BASED EXERCISE"[MESH] OR CIRCUIT TRAINING[TIAB])) OR (((AMBULATION[TIAB] OR ("WALKING"[MESH] OR WALKING[TIAB])) AND DAILY[TIAB]) OR ("EXERCISE"[MESH] OR EXERCISE\*[TIAB] OR "EXERCISE THERAPY"[MESH]) OR ((HEAT TREATMENT\*[TIAB] OR THERMAL THERAP\*[TIAB]) OR ("DIATHERMY"[MESH] OR DIATHERM\*[TIAB]) OR ((HYPERTHERMIC THERAP\*[TIAB]) OR (HEAT THERAP\*[TIAB]) OR (THERAPEUTIC HEAT[TIAB]) OR ((HEAT APPLICATION\*[TIAB]) OR ("HYPERTHERMIA, INDUCED"[MESH] OR THERMOTHERAP\*[TW]) OR ((LOCAL HEAT[TIAB]) OR ("HOT TEMPERATURE/THERAPEUTIC USE"[MESH]) OR (HOT PACK\*)))) OR (HEATING PAD\*[TIAB])))) OR (DIATHERAP\*[TIAB] OR DIATHERMIA[TIAB] OR INDUCTOTHERMY[TIAB])) OR ((COLD BATH\*[TIAB] OR CRYOGENIC THERAP\*[TIAB] OR CRYOTHERM\*[TIAB] OR CRYO-TREATMENT\*[TIAB] OR CRYOTREATMENT\*[TIAB]) OR (COOLING THERAP\*[TIAB]) OR ((COLD TREATMENT\*[TIAB] OR THERAPEUTIC COOLING[TIAB]) OR ("CRYOTHERAPY"[MESH] OR CRYOTHERAP\*[TIAB] OR COLD THERAP\*[TIAB] OR HYPOTHERM\*[TW]) OR (ICE THERAP\*[TIAB] OR ICE PACK\*[TIAB])))) OR ("ADAPTATION, PSYCHOLOGICAL"[MESH:NOEXP] OR COPING BEHAVIOR\*[TIAB] OR COPING BEHAVIOUR\*[TIAB] OR COPING SKILL\*[TIAB] OR ADAPTIVE BEHAVIOR\*[TIAB]) OR ("PATIENT COMPLIANCE"[MESH] OR PATIENT COMPLIANCE[TIAB] OR PATIENT ADHERENCE[TIAB] OR PATIENT COOPERATION[TIAB]) OR ("PATIENT EDUCATION AS TOPIC"[MESH] OR PATIENT EDUCATION[TIAB] OR "EDUCATION OF PATIENTS"[TIAB]) OR ((SELF-HELP[TIAB] OR SELF HELP[TIAB] OR SELF TREATMENT[TIAB] OR SELF-TREATMENT[TIAB]) OR ("SELF EFFICACY"[MESH] OR SELF EFFICACY[TIAB] OR SELF-EFFICACY[TIAB]) OR ("SELF CARE"[MH:NOEXP] OR SELF CARE[TIAB] OR SELF MANAGEMENT[TIAB] OR SELF-CARE[TIAB] OR SELF-MANAGEMENT[TIAB])) OR ("PATIENT PARTICIPATION"[MESH] OR PATIENT PARTICIPATION[TIAB] OR PATIENT INVOLVEMENT[TIAB] OR PATIENT EMPOWERMENT[TIAB] OR PATIENT

ACTIVATION[TIAB] OR PATIENT ENGAGEMENT[TIAB])) OR (("MINDFULNESS"[TIAB]) OR ((CBT-I[TIAB]) OR (COGNITIVE BEHAVIOR\*[TIAB] OR COGNITIVE BEHAVIOUR\* OR ("COGNITIVE THERAPY"[MESH] OR COGNITIVE THERAP\*[TIAB] OR CBT[TIAB] OR COGNITION THERAP\*[TIAB] OR COGNITIVE PSYCHOTHERAP\*[TIAB]))) OR ((WEIGHT DECREAS\*[TIAB] OR WEIGHT LOSING[TIAB] OR WEIGHT REDUCING[TIAB] OR WEIGHT WATCHING[TIAB]) OR ("WEIGHT LOSS"[MH:NOEXP] OR WEIGHT LOSS\*[TIAB] OR WEIGHT REDUCTION\*[TIAB])) OR (("ACUPUNCTURE THERAPY"[MESH]) OR ("ACUPUNCTURE"[MESH] OR ACUPUNCTURE\*[TIAB] OR PHARMACOPUNCTURE\*[TIAB])) OR (("YOGA"[TW]) OR ("THERAPEUTIC TOUCH"[TW] OR REIKI[TIAB] OR LAYING-ON-OF-HANDS[TIAB]) OR ("TAI JI"[TW] OR TAI-JI[TIAB] OR TAI CHI[TIAB] OR TAI JI QUAN[TIAB] OR TAIJI[TIAB] OR TAIJIQUAN[TIAB] OR T'AI CHI[TIAB]) OR (RELAXATION THERAP\*[TW] OR RELAXATION TECHNIQUE\*[TIAB] OR RELAXATION TECHNIQS[TIAB]) OR ("PSYCHOPHYSIOLOGY"[TW] OR PHYSIOLOGICAL PSYCHOLOGY[TIAB] OR PHYSIOLOGIC PSYCHOLOGY[TIAB]) OR ("PSYCHODRAMA"[MESH] OR PSYCHODRAMA\*[TIAB] OR DRAMA THERAP\*[TIAB] OR DRAMATHERAP\*[TIAB] OR ROLE PLAYING[TIAB]) OR ("MENTAL HEALING"[TW]) OR ("MEDITATION"[TW]) OR (LAUGHTER THERAP\*[TW]) OR ("IMAGERY (PSYCHOTHERAPY)"[MESH] OR IMAGERY[TW] OR DIRECTED REVERIE THERAP\*[TIAB] OR IMAGERIES[TIAB]) OR ("SUGGESTION"[MESH] OR AUTOSUGGESTION\*[TIAB]) OR (PROGRESSIVE RELAXATION\*[TIAB] OR PROGRESSIVE MUSCLE RELAXATION\*[TIAB]) OR (AUTOGENIC TRAINING[TW]) OR ("HYPNOSIS"[MESH] OR HYPNOSI\*[TIAB] OR HYPNOTISM\*[TIAB] OR HYPNOTHERAP\*[TIAB] OR MESMERISM\*[TIAB]) OR (QI GONG[TIAB] OR CH'I KUNG[TIAB]) OR ("BREATHING EXERCISES"[MESH] OR BREATHING EXERCISE\*[TIAB] OR QIGONG\*[TIAB]) OR (NEUROFEEDBACK\*[TIAB] OR ALPHA FEEDBACK\*[TIAB] OR ELECTROMYOGRAPHY FEEDBACK\*[TIAB] OR EEG FEEDBACK\*[TIAB] OR BRAINWAVE FEEDBACK\*[TIAB]) OR ("AROMATHERAPY"[MESH] OR BIOFEEDBACK\*[TIAB] OR PSYCHOLOGICAL FEEDBACK\*[TIAB] OR MYOFEEDBACK\*[TIAB] OR PHYSIOLOGICAL FEEDBACK\*[TIAB]) OR ("MIND-BODY THERAPIES"[MESH] OR MIND-BODY[TIAB] OR MIND BODY[TIAB])) OR ("CANES"[MESH] OR CANE[TIAB] OR CANES[TIAB] OR WALKING STICK\*[TIAB]) OR (("TRANSCUTANEOUS ELECTRIC NERVE STIMULATION"[MESH] OR TRANSCUTANEOUS ELECTRIC NERVE STIMULATION[TIAB] OR TRANSCUTANEOUS ELECTRICAL NERVE STIMULATION[TIAB] OR ELECTROSTIMULATION\*[TIAB] OR ELECTROANALGESIA[TIAB]) OR (PERCUTANEOUS ELECTRIC NERVE STIMULATION\*[TIAB] OR TENS[TIAB] OR TRANSCUTANEOUS ELECTRICAL STIMULATION\*[TIAB] OR TRANSDERMAL ELECTROSTIMULATION\*[TIAB] OR PERCUTANEOUS ELECTRICAL NERVE STIMULATION\*[TIAB] OR TRANSCUTANEOUS ELECTRICAL NERVE STIMULATION\*[TIAB] OR TRANSCUTANEOUS ELECTRIC STIMULATION\*[TIAB] OR TRANSCUTANEOUS NERVE STIMULATION\*[TIAB] OR ANALGESIC CUTANEOUS ELECTROSTIMULATION\*[TIAB] OR ELECTROANALGESIA\*[TIAB] OR TRANSCUTANEOUS ELECTRIC NERVE STIMULATION[TIAB] OR TRANSCUTANEOUS ELECTROSTIMULATION[TIAB])) OR (("PULSED RADIOFREQUENCY TREATMENT"[MESH] OR PULSED RADIOFREQUENCY TREATMENT\*[TIAB] OR PULSED RADIO FREQUENCY TREATMENT\*[TIAB]) OR ("ELECTRIC STIMULATION THERAPY"[MESH] OR ELECTROTHERAP\*[TIAB] OR ELECTRIC STIMULATION\*[TIAB] OR ELECTRICAL STIMULATION\*[TIAB]) OR ((WHOLE BODY VIBRATION\*[TIAB]) OR ((WBV[TIAB]) OR (VIBRATION TRAINING[TIAB]) OR (("VIBRATION/THERAPEUTIC USE"[MESH]) OR (ELECTROPHYSICAL THERAP\*[TIAB]) OR (PULSED VIBRATION THERAP\*[TIAB]))) OR ("MASSAGE"[MESH] OR MASSAGE\*[TIAB] OR ZONE THERAP\*[TIAB] OR REFLEXOLOG\*[TIAB] OR ROLFING[TIAB] OR BODYWORK\*[TIAB]) OR (((OSTEOPATH\*[TIAB] OR ORTHOP\*[TW] OR SPINE[TIAB] OR SPINAL[TIAB]) AND MANIPULAT\*[TIAB]) OR ("ACUPRESSURE"[MESH] OR ACUPRESSURE[TIAB] OR SHIATSU[TIAB] OR ZHI

YA[TIAB] OR CHIH YA[TIAB]) OR ("THERAPY, SOFT TISSUE"[MESH] OR SOFT TISSUE THERAP\*[TIAB]) OR ("MANIPULATION, OSTEOPATHIC"[MESH]) OR ("MANIPULATION, CHIROPRACTIC"[MESH] OR CHIROPRACTIC\*[TIAB]) OR (APPLIED KINESIOLOG\*[TIAB]) OR ("MUSCULOSKELETAL MANIPULATIONS"[MESH] OR MUSCULOSKELETAL MANIPULATION\*[TIAB] OR MANUAL THERAP\*[TIAB] OR MANIPULATION THERAP\*[TIAB] OR MANIPULATIVE THERAP\*[TIAB])) OR (((JOINT INJECTION\*[TIAB]) OR (("INJECTIONS, INTRA-ARTICULAR"[MESH]) OR (INTRAARTICULAR\*[TW] OR INTRA-ARTICULAR\*[TW] OR INTRA ARTICULAR\*[TW]))) AND (((("ANESTHETICS"[PHARMACOLOGICAL ACTION]) OR (ANESTHETIC\*[TW] OR ANAESTHETI\*[TIAB])) OR ("SALINE SOLUTION, HYPERTONIC"[MESH] OR SALINE\*[TIAB] OR SODIUM CHLORIDE SOLUTION\*[TIAB]) OR (("BONT/A"[TIAB]) OR ((BOTULINIUM TOXIN[TIAB] OR BOTULINIUM NEUROTOXIN[TIAB] OR BOTULINUS TOXIN[TIAB] OR BOTULISM TOXIN[TIAB] OR CLOSTRIDIUM BOTULINIUM EXOTOXIN[TIAB]) OR ("BOTULINIUM TOXINS"[MESH] OR BOTULINIUM TOXIN\*[TW] OR BOTULIN[TIAB])))) OR (((HYPERTONIC DEXTROSE\*[TIAB]) OR ("GLUCOSE SOLUTION, HYPERTONIC"[MESH] OR HYPERTONIC GLUCOSE SOLUTION\*[TIAB] OR GLUCOSE HYPERTONIC SOLUTION\*[TIAB]) OR ("HYPERTONIC SOLUTIONS"[MESH] AND DEXTROSE[TW])) OR (("MESENCHYMAL STROMAL CELLS"[MESH]) OR (MESENCHYMAL STROMAL CELL\*[TIAB] OR MESENCHYMAL STEM CELL\*[TIAB] OR MESENCHYMAL PROGENITOR CELL\*[TIAB] OR MULTIPOTENT BONE MARROW STROMAL CELL\*[TIAB] OR BONE MARROW STROMAL CELL\*[TIAB] OR WHARTON JELLY CELL\*[TIAB] OR WHARTON'S JELLY CELL\*[TIAB] OR WHARTONS JELLY CELL\*[TIAB] OR MSC[TIAB])) OR ((THROMBOCYTE RICH PLASMA\*[TIAB] OR THROMBOCYTE-RICH PLASMA\*[TIAB]) OR ("PLATELET-RICH PLASMA"[MESH] OR PRP[TIAB] OR PLATELET RICH PLASMA[TIAB])))) OR (PROLIFERATIVE THERAP\*[TIAB]) OR (PROLOTHERAP\*[TIAB])) OR ((CYCLOOXYGENASE INHIBIT\*[TIAB] OR CYCLOOXYGENASE 2 INHIBIT\*[TIAB]) OR (((NONSTEROIDAL ANTIINFLAMMATORY AGENT\*[TW] OR NONSTEROIDAL ANTI INFLAMMATORY AGENT\*[TW] OR NON-STEROIDAL ANTI-INFLAMMATORY AGENT\*[TW] OR NON STEROIDAL ANTI INFLAMMATORY AGENT\*[TW] OR ASPIRIN-LIKE AGENT\*[TW] OR ANTI-INFLAMMATORY ANALGESIC\*[TW] OR NON-STEROIDAL ANTI-RHEUMATIC AGENT\*[TW] OR NON-STEROIDAL ANTIRHEUMATIC AGENT\*[TW]) OR ("ANTI-INFLAMMATORY AGENTS, NON-STEROIDAL"[PHARMACOLOGICAL ACTION]) OR ("ANTI-INFLAMMATORY AGENTS, NON-STEROIDAL"[MESH] OR NSAID\*[TW])) OR (A 771726[TW] OR ACECLOFENAC[TW] OR ACEMETACIN[TW] OR ACETOSYRINGONE[TW] OR ACETOVANILLONE[TW] OR ACETYLSALICYLIC ACID LYSINATE[TW] OR ADAPALENE[TW] OR ALCLOFENAC[TW] OR ALMINOPROFEN[TW] OR AMIPRILOSE[TW] OR AMPYRONE[TW] OR ANDROGRAPHOLIDE[TW] OR ANISODAMINE[TW] OR ANISODINE[TW] OR ANTIFLAMMIN P2[TW] OR ANTIPYRINE[TW] OR APAZONE[TW] OR APREMILAST[TW] OR ARTEPARON[TW] OR ARTHROTEC[TW] OR ASPIRIN[TW] OR ATRINOSITOL[TW] OR AZULENE[TW] OR BAICALIN[TW] OR BALSALAZIDE[TW] OR BENDAZAC[TW] OR BENORILATE[TW] OR BENOXAPROFEN[TW] OR BENZOBARBITAL[TW] OR BERBAMINE[TW] OR BETULINIC ACID[TW] OR BEVONIUM[TW] OR BIPHENYLYLACETIC ACID[TW] OR BOLDINE[TW] OR BREDININ[TW] OR BROMFENAC[TW] OR BUCILLAMINE[TW] OR BUFEXAMAC[TW] OR BUMADIZONE[TW] OR BUTIBUFEN[TW] OR CARBASPIRIN CALCIUM[TW] OR CARBON FIBER[TW] OR CARPROFEN[TW] OR CARYOPHYLLENE[TW] OR CASTANOSPERMINE[TW] OR CDP 571[TW] OR CELECOXIB[TW] OR CEPHARANTHINE[TW] OR CHLOROQUINE DIPHOSPHATE[TW] OR CHOLINE MAGNESIUM TRISALICYLATE[TW] OR CHRYSAROBIN[TW] OR CLONIXIN[TW] OR CP 96345[TW] OR CURCUMIN[TW] OR DAURICINE[TW] OR DEXKETOPROFEN TROMETAMOL[TW] OR DICLOFENAC[TW] OR DICLOFENAC

HYDROXYETHYLPYRROLIDINE[TW] OR DIFENPIRAMIDE[TW] OR DIFLUNISAL[TW] OR  
DIMEPHOSPHON[TW] OR DIPYRONE[TW] OR DIUCIFON[TW] OR DROXICAM[TW] OR DUP 697[TW] OR  
EBSELEN[TW] OR EFAMOL[TW] OR ELTENAC[TW] OR ENFENAMIC ACID[TW] OR EPIRIZOLE[TW] OR  
ETANERCEPT[TW] OR ETHENZAMIDE[TW] OR ETHONIUM[TW] OR ETODOLAC[TW] OR  
ETOFENAMATE[TW] OR ETORICOXIB[TW] OR FENAMIC ACID[TW] OR FENBUFEN[TW] OR  
FENCLOFENAC[TW] OR FENFLUMIZOLE[TW] OR FENOPROFEN[TW] OR FENTIAZAC[TW] OR  
FEPRADINOL[TW] OR FEPRAZONE[TW] OR FERULIC ACID[TW] OR FLOCTAFENINE[TW] OR  
FLOSULIDE[TW] OR FLUNIXIN[TW] OR FLUNIXIN MEGLUMINE[TW] OR FLUNOXAPROFEN[TW] OR  
FLUPROQUAZONE[TW] OR FLURBIPROFEN[TW] OR FLURBIPROFEN AXETIL[TW] OR FR 167653[TW] OR  
FR 173657[TW] OR GLUCAMETACIN[TW] OR GUACETISAL[TW] OR HELENALIN[TW] OR  
HELIODERMIN[TW] OR HEMODES[TW] OR HIGENAMINE[TW] OR IBUPROFEN[TW] OR IBUPROXAM[TW]  
OR ICATIBANT[TW] OR IH 764-3[TW] OR IMIDAZOLE-2-HYDROXYBENZOATE[TW] OR INDOBUFEN[TW]  
OR INDOMETHACIN[TW] OR INDOPROFEN[TW] OR IODOANTIPYRINE[TW] OR ISOXICAM[TW] OR  
KEBUZONE[TW] OR KETOPROFEN[TW] OR KETOPROFEN LYSINE[TW] OR KETOROLAC[TW] OR L  
745337[TW] OR L 778736[TW] OR LIPOXIN A4[TW] OR LIPOXIN B4[TW] OR LISOFYLLINE[TW] OR  
LOBENZARIT[TW] OR LONAZOLAC[TW] OR LORNOXICAM[TW] OR LOXOPROFEN[TW] OR  
LUMIRACOXIB[TW] OR MAGNESIUM SALICYLATE[TW] OR MAGNOLOL[TW] OR MANOALIDE[TW] OR  
MASOPROCOL[TW] OR MECLOFENAMIC ACID\*[TW] OR MEFENAMIC ACID\*[TW] OR MELOXICAM[TW]  
OR MESALAMINE[TW] OR MOFEBUTAZONE[TW] OR MOFEZOLAC[TW] OR NABUMETONE[TW] OR  
NAFAMOSTAT[TW] OR NAPROXEN[TW] OR NEBACETIN[TW] OR NEPAFENAC[TW] OR NIFENAZONE[TW]  
OR NIFLUMIC ACID[TW] OR NIMESULIDE[TW] OR NITROASPIRIN[TW] OR OLOPATADINE  
HYDROCHLORIDE[TW] OR OLSALAZINE[TW] OR OLVANIL[TW] OR OREN GEDOKU TO[TW] OR  
ORGOTEIN[TW] OR OXAPROZIN[TW] OR OXYPHENBUTAZONE[TW] OR PALMIDROL[TW] OR  
PARECOXIB[TW] OR PARTHENOLIDE[TW] OR PEONIFLORIN[TW] OR PHENIDONE[TW] OR  
PHENYLBUTAZONE[TW] OR PIMECROLIMUS[TW] OR PIRFENIDONE[TW] OR PIROXICAM[TW] OR  
PIROXICAM-BETA-CYCLODEXTRIN[TW] OR PIRPROFEN[TW] OR PROGLUMETACIN[TW] OR  
PROPACETAMOL[TW] OR PROPIONYLCARNITINE[TW] OR PROPYPHENAZONE[TW] OR  
PROQUAZONE[TW] OR PYRANOPROFEN[TW] OR PYRAZOLONE[TW] OR PYROGENAL[TW] OR  
RESVERATROL[TW] OR ROFECOXIB[TW] OR ROSMARINIC ACID[TW] OR RUMALON[TW] OR SAIKO-  
KEISHI-TO[TW] OR SAIKOSAPONIN[TW] OR SALICIN[TW] OR SALICYLAMIDE[TW] OR SALICYLATES[TW] OR  
SALICYLSALICYLIC ACID[TW] OR SB 203580[TW] OR SC 299[TW] OR SC 41930[TW] OR SC 560[TW] OR  
SEMAPIMOD[TW] OR SERATRODAST[TW] OR SERRATIOPEPTIDASE[TW] OR SHIKONIN[TW] OR  
SINAPALDEHYDE[TW] OR SODIUM SALICYLATE\*[TW] OR ST 679[TW] OR SULFASALAZINE[TW] OR  
SULINDAC[TW] OR SULINDAC SULFIDE[TW] OR SULINDAC SULFONE[TW] OR SUPROFEN[TW] OR  
SUXIBUZONE[TW] OR TANSHINONE[TW] OR TAXIFOLIN[TW] OR TENIDAP[TW] OR TENOXICAM[TW] OR  
TEPOXALIN[TW] OR TIAPROFENIC ACID[TW] OR TIARAMIDE[TW] OR TINORIDINE[TW] OR TOLFENAMIC  
ACID[TW] OR TOLMETIN[TW] OR TRANILAST[TW] OR TRIBENOSIDE[TW] OR URSOLIC ACID[TW] OR  
VALDECOXIB[TW] OR ZILEUTON[TW] OR ZOMEPIRAC[TW])) OR ((HYDROXYACETANILIDE[TIAB] OR  
APAP[TIAB] OR P-ACETAMIDOPHENOL[TIAB] OR P-HYDROXYACETANILIDE[TIAB] OR  
PARACETAMOL[TIAB] OR ACETAMIDOPHENOL[TIAB] OR ACEPHEN[TIAB] OR TYLENOL[TIAB] OR  
ANACIN\*[TIAB] OR PANADOL[TIAB] OR ACAMOL[TIAB]) OR ("ACETAMINOPHEN"[MESH] OR  
ACETAMINOPHEN[TIAB])) OR ((GLUCOSAMIDE[TIAB] OR D GLUCOSE AMINE[TIAB] OR GLUCOSE

AMINE[TIAB] OR NSC 758[TIAB]) OR (2-AMINO-2-DEOXYGLUCOSE[TIAB] OR 2 AMINO 2 DEOXYGLUCOSE[TIAB] OR DONA[TIAB] OR DONA S[TIAB]) OR "GLUCOSAMINE"[MESH] OR GLUCOSAMINE[TIAB] OR 2-AMINO-2-DEOXYGLUCOSE[TIAB] OR 2 AMINO 2 DEOXYGLUCOSE[TIAB] OR DONA[TIAB] OR DONA S[TIAB]) OR ("CHONDROITIN"[MESH] OR CHONDROITIN[TIAB]) OR ((ALFENTANIL[TW] OR ALPHAPRODINE[TW] OR BETA-CASOMORPHINS[TW] OR BUPRENORPHINE[TW] OR BUTORPHANOL[TW] OR CARFENTANIL[TW] OR CODEINE[TW] OR DERMORPHIN[TW] OR DEXTROMORAMIDE[TW] OR DEXTROPROPOXYPHENE[TW] OR DEZOCINE[TW] OR DIHYDROCODEINE[TW] OR DIHYDROMORPHINE[TW] OR DIPHENOXYLATE[TW] OR ENDOMORPHIN 1[TW] OR ENDOMORPHIN 2[TW] OR ESEROLINE[TW] OR ETHYLKETOCYCLAZOCINE[TW] OR ETHYLMORPHINE[TW] OR ETORPHINE[TW] OR FENTANYL[TW] OR HEROIN[TW] OR HYDROCODONE[TW] OR HYDROMORPHONE[TW] OR KETOBEMIDONE[TW] OR LEVORPHANOL[TW] OR LOFENTANIL[TW] OR MEPERIDINE[TW] OR MEPTAZINOL[TW] OR METHADONE[TW] OR METHADYL ACETATE[TW] OR MORPHINE[TW] OR NALBUPHINE[TW] OR NOCISTATIN[TW] OR NORMETHADONE[TW] OR OPIATE ALKALOIDS[TW] OR OPIUM[TW] OR OXYCODONE[TW] OR OXYMORPHONE[TW] OR PARACY METHADOL[TW] OR PENTAZOCINE[TW] OR PHENAZOCINE[TW] OR PHENOPERIDINE[TW] OR PIRINITRAMIDE[TW] OR PROMEDOL[TW] OR PROTOPINE[TW] OR REMIFENTANIL[TW] OR SUFENTANIL[TW] OR TILIDINE[TW] OR OXYCONTIN[TW]) OR ((ALGOPAN[TIAB] OR BIOPON[TIAB] OR LAUDANUM[TIAB] OR NEPENTHE[TIAB] OR OMNOPON[TIAB] OR OPIAL[TIAB] OR OPIUM[TIAB] OR OPON[TIAB] OR PANTOPON[TIAB] OR PAPAVERETUM[TIAB] OR PAVON[TIAB] OR TETRAPON[TIAB]) OR ("ANALGESICS, OPIOID"[PHARMACOLOGICAL ACTION]) OR (OPIATE\*[TIAB]) OR ("ANALGESICS, OPIOID"[MESH] OR OPIOID\*[TIAB])) OR ((TRAMADOL\*[TIAB] OR TRAMUNDIN[TIAB] OR DALGIC OR K-315[TIAB] OR K 315[TIAB] OR K315[TIAB] OR NOBLIGAN[TIAB] OR ZYTRAM[TIAB] OR TIRAL[TIAB] OR TOPALGIC[TIAB] OR TRAMA ABZ[TIAB] OR TRAMA KD[TIAB] OR TRAMA DORSCH[TIAB] OR RANITIDIN 1A PHARMA[TIAB] OR TRAMA 1A PHARMA[TIAB] OR ULTRAM[TIAB] OR ZYDOL[TIAB] OR TRAMADOLOR[TIAB] OR TRAMAL[TIAB] OR ADOLONTA[TIAB] OR CONTRAMAL[TIAB]) OR ("TRAMADOL"[MESH])) OR ("DULOXETINE HYDROCHLORIDE"[MESH] OR DULOXETINE[TIAB] OR LY 248686[TIAB] OR LY-248686[TIAB] OR CYMBALTA[TIAB]) OR ((((((NERVE GROWTH FACTOR ANTISERUM[TIAB] OR NGF ANTISERUM[TIAB]) OR (ANTISERUM NGF[TIAB]) OR (ANTI-NERVE GROWTH FACTOR\*[TIAB]) OR ("TANEZUMAB"[SUPPLEMENTARY CONCEPT] OR TANEZUMAB[TIAB]) OR (NERVE GROWTH FACTOR ANTIBOD\*[TIAB]) OR ("NERVE GROWTH FACTORS/ANTAGONISTS AND INHIBITORS"[MESH]) OR (ANTI-NGF[TIAB])) OR ("FULRANUMAB"[SUPPLEMENTARY CONCEPT] OR FULRANUMAB[TIAB])) OR (NERVE GROWTH FACTOR INHIBITOR\*[TIAB] OR NERVE GROWTH FACTOR ANTAGONIST\*[TIAB] OR NERVE GROWTH FACTOR BLOCKER\*[TIAB] OR NGF INHIBITOR\*[TIAB] OR NGF ANTAGONIST\*[TIAB] OR NGF BLOCKER\*[TIAB])) OR (NGF-AB[TIAB])) OR (FASINUMAB[TIAB])) OR (("GAMMA-AMINO BUTYRIC ACID"[MESH] OR GAMMA AMINO BUTYRIC ACID\*[TIAB] OR GABA[TIAB] OR AMINALON\*[TIAB] OR GAMMALON[TIAB] OR HORIZANT[TIAB]) OR ("GABAPENTIN"[SUPPLEMENTARY CONCEPT] OR GABAPENTIN[TIAB] OR CONVALIS[TIAB] OR NEURONTIN[TIAB])) OR (("TECHNETIUM TC 99M MEDRONATE"[MESH] OR MEDRONATE[TIAB] OR 99MTC-MDP[TIAB] OR TECHNETIUM TC 99M METHYLENEDIPHOSPHONATE[TIAB] OR TC-99M MDP[TIAB]) OR ("RISEDRONATE SODIUM"[MESH] OR RISEDRONATE[TIAB] OR RISEDRONIC ACID[TIAB] OR ACTONEL[TIAB] OR ATELVIA[TIAB]) OR (ETHANEHYDROXYDIPHOSPHONATE[TIAB] OR HEDSPA[TIAB] OR XIDIFON[TIAB] OR XYDIPHONE[TIAB] OR XIDIPHON[TIAB] OR DIDRONEL[TIAB]) OR ("ETIDRONIC ACID"[MESH] OR ETIDRONIC ACID\*[TIAB]) OR

ETIDRONATE\*[TIAB] OR EHDP[TIAB] OR ETHANEHYDROXYDIPHOSPHONATE[TIAB] OR HEDSPA[TIAB] OR XIDIFON[TIAB] OR XYDIPHONE[TIAB] OR XIDIPHON[TIAB] OR DIDRONEL[TIAB]) OR ("CLODRONIC ACID"[TIAB] OR DICHLOROMETHYLENEBISPHOSPHONATE\*[TIAB] OR DICHLOROMETHANEDIPHOSPHONATE[TIAB] OR CLODRONATE[TIAB] OR BONEFOS[TIAB]) OR ("ALENDRONATE"[TIAB] OR FOSAMAX[TIAB] OR MK-217[TIAB] OR MK 217[TIAB]) OR (DIPHOSPHONIC ACID DERIVATIVE\*[TIAB]) OR (BIPHOSPHONATE\*[TIAB]) OR (BISPHOSPHONIC ACID DERIVATIVE\*[TIAB]) OR ("DIPHOSPHONATES"[MESH] OR DIPHOSPHONATE\*[TIAB] OR BISPHOSPHONATE\*[TIAB])) OR ((FETZIMA[TIAB]) OR (PRISTIQ[TIAB]) OR (("VENLAFAXINE HYDROCHLORIDE"[MESH] OR VENLAFAXINE[TIAB] OR EFFEXOR[TIAB] OR TREVILOR[TIAB] OR VANDRAL[TIAB] OR EFEXOR[TIAB] OR DOBUPAL[TIAB]) OR ("SIBUTRAMINE"[SUPPLEMENTARY CONCEPT] OR SIBUTRAMINE[TIAB] OR REDUCTIL[TIAB] OR MERIDIA[TIAB]) OR ("MILNACIPRAN"[SUPPLEMENTARY CONCEPT] OR MIDALCIPRAN[TIAB] OR LEVOMILNACIPRAN[TIAB] OR SAVELLA[TIAB]) OR ("DESVENLAFAXINE SUCCINATE"[MESH] OR DESVENLAFAXINE[TIAB]) OR (CLOMIPRAMINE[TW] OR DESVENLAFAXINE[TW] OR MILNACIPRAN[TW] OR SIBUTRAMINE[TW] OR TRIPLE REUPTAKE INHIBITOR\*[TW] OR VENLAFAXINE[TW]) OR HYDIPHEN[TIAB] OR ANAFRANIL[TIAB] OR ((DUAL MONOAMINE REUPTAKE INHIBITOR[TIAB] OR DUAL MONOAMINE UPTAKE INHIBITOR[TIAB] OR DUAL REUPTAKE INHIBITOR[TIAB] OR DUAL UPTAKE INHIBITOR[TIAB] OR NORADRENALIN SEROTONIN REUPTAKE INHIBITOR[TIAB] OR NORADRENALIN SEROTONIN UPTAKE INHIBITOR[TIAB] OR NOREPINEPHRINE SEROTONIN REUPTAKE INHIBITOR[TIAB] OR NOREPINEPHRINE SEROTONIN UPTAKE INHIBITOR[TIAB] OR SELECTIVE SEROTONIN NORADRENALIN REUPTAKE INHIBITOR[TIAB] OR "SEROTONIN AND NORADRENALINE REUPTAKE INHIBITOR"[TIAB] OR "SEROTONIN AND NORADRENALINE REUPTAKE INHIBITORS"[TIAB] OR "SEROTONIN AND NORADRENALINE UPTAKE INHIBITOR"[TIAB] OR "SEROTONIN AND NOREPINEPHRINE REUPTAKE INHIBITOR"[TIAB] OR "SEROTONIN AND NOREPINEPHRINE UPTAKE INHIBITOR"[TIAB] OR SEROTONIN NORADRENALIN UPTAKE INHIBITOR[TIAB] OR SEROTONIN NOREPINEPHRINE REUPTAKE INHIBITOR[TIAB] OR SEROTONIN NOREPINEPHRINE UPTAKE INHIBITOR[TIAB] OR SNRI[TIAB] OR SNRIS[TIAB] OR SSNRI[TIAB]) OR (SNRI\*[TIAB]) OR ("SEROTONIN AND NORADRENALINE REUPTAKE INHIBITOR"[TIAB])) OR (DUAL MONOAMINE REUPTAKE INHIBITOR[TIAB] OR DUAL MONOAMINE UPTAKE INHIBITOR[TIAB] OR DUAL REUPTAKE INHIBITOR[TIAB] OR DUAL UPTAKE INHIBITOR[TIAB] OR NORADRENALIN SEROTONIN REUPTAKE INHIBITOR[TIAB] OR NORADRENALIN SEROTONIN UPTAKE INHIBITOR[TIAB] OR NOREPINEPHRINE SEROTONIN REUPTAKE INHIBITOR[TIAB] OR NOREPINEPHRINE SEROTONIN UPTAKE INHIBITOR[TIAB] OR SELECTIVE SEROTONIN NORADRENALIN REUPTAKE INHIBITOR[TIAB] OR "SEROTONIN AND NORADRENALINE REUPTAKE INHIBITOR"[TIAB] OR "SEROTONIN AND NORADRENALINE REUPTAKE INHIBITOR"[TIAB] OR "SEROTONIN AND NORADRENALINE UPTAKE INHIBITOR"[TIAB] OR "SEROTONIN AND NOREPINEPHRINE REUPTAKE INHIBITOR"[TIAB] OR "SEROTONIN AND NOREPINEPHRINE UPTAKE INHIBITOR"[TIAB] OR SEROTONIN NORADRENALIN UPTAKE INHIBITOR[TIAB] OR SEROTONIN NOREPINEPHRINE REUPTAKE INHIBITOR[TIAB] OR SEROTONIN NOREPINEPHRINE UPTAKE INHIBITOR[TIAB] OR SNRI[TIAB] OR SNRIS[TIAB] OR SSNRI[TIAB]) OR (SNRI\*[TIAB]) OR ("SEROTONIN AND NORADRENALINE REUPTAKE INHIBITOR"[TIAB])) OR (2-HYDROXYDESIPRAMINE AND (TW) OR AMINEPTIN AND (TW) OR AMITRIPTYLINE AND (TW) OR CLOMIPRAMINE AND (TW) OR CYCLOBENZAPRINE AND (TW) OR DESIPRAMINE AND (TW) OR DESMETHYLDOXEPIN AND (TW) OR DIBENZEPIN AND (TW) OR DOTHIEPIN AND (TW) OR DOXEPIN AND (TW) OR IMIPRAMINE AND (TW) OR IPRINDOLE AND (TW) OR LOFEPRAMINE AND (TW) OR

MELITRACENE AND (TW) OR METAPRAMINE AND (TW) OR MIRTAZAPINE AND (TW) OR NORTRIPTYLINE AND (TW) OR NOXIPTILIN AND (TW) OR OPIPRAMOL AND (TW) OR PROTRIPTYLINE AND (TW) OR TIANEPTINE AND (TW) OR TRIMIPRAMINE AND (TW) OR ("ANTIDEPRESSIVE AGENTS, TRICYCLIC"[PHARMACOLOGICAL ACTION]) OR ("ANTIDEPRESSIVE AGENTS, TRICYCLIC"[MESH] OR TRICYCLIC ANTIDEPRESS\*[TIAB])) OR ("PREGABALIN"[MESH] OR PREGABALIN[TIAB] OR LYRICA[TIAB]) OR ("METHOTREXATE"[MESH] OR METHOTREXATE\*[TW] OR AMETHOPTERIN\*[TW] OR MEXATE[TW] OR (METHYLPTEROYLGLUTAMIC ACID[TW] OR A METHOPTERINE[TW] OR AMETOPTERINE\*[TW] OR CL 14377[TW] OR EMTHEXAT[TW] OR EMTREXATE[TW] OR FOLEX[TW] OR INTRADOSE MTX[TW] OR LEDERTREXATE[TW] OR METEX[TW] OR METHROTREXATE[TW] OR METHYLAMINOPTERIN[TW] OR METOJECT[TW] OR METOTHREXATE[TW] OR METOTHREXATE SODIUM[TW] OR METOTREXAT[TW] OR METOTREXATE[TW] OR METREX[TW] OR MPI 5004[TW] OR MTX[TW] OR NEOTREXATE[TW] OR NSC 740[TW] OR OTREXUP[TW] OR RHEUMATREX[TW] OR TEXATE[TW] OR TREXALL[TW])) OR (("LUMICOLCHICINES"[TIAB]) OR (DEMECOLCINE[TIAB]) OR (COLCHAMINE[TIAB] OR COLCEMIDE[TIAB] OR COLCEMID[TIAB]) OR ("COLCHICINE"[MESH] OR COLCHICINE[TIAB])) OR (((("DIHYDROTACHYSTEROL"[TIAB] OR TACHYSTIN[TIAB] OR DIHYDROTACHYSTERIN[TIAB] OR CALCAMINE[TIAB]) OR ("25-HYDROXYVITAMIN D 2"[TIAB] OR ERCALCIDIOL[TIAB]) OR (VITAMIN D2[TIAB] OR VITAMIN D3[TIAB]) OR (ERGOCALCIFEROL\*[TIAB] OR CALCIFEROLS[TIAB]) OR (HYDROXYCHOLECALCIFEROLS[TIAB] OR HYDROXYVITAMINS D[TIAB] OR HYDROXYCHOLECALCIFEROL[TIAB]) OR (CHOLECALCIFEROL[TIAB] OR CALCIOL[TIAB] OR CHOLECALCIFEROLS[TIAB]) OR ("VITAMIN D"[MESH] OR VITAMIN D[TIAB])) OR (CALCITRIOL[TW] OR DIHYDROXYCHOLECALCIFEROL[TW] OR 24,25-DIHYDROXY VITAMIN D3[TW])) OR (("EICOSAPENTAENOIC ACID"[TW] OR EICOSAPENTANOIC ACID\*[TIAB] OR TIMNODONIC ACID[TIAB]) OR (DOCOSAHEXAENOIC ACID\*[TIAB] OR DOCOSAHEXAENOATE[TIAB] OR DOCOSAHEXAENOIC ACID\*[TIAB]) OR (OMEGA-3 FATTY ACID\*[TIAB] OR N3 FATTY ACID\*[TIAB] OR N3 PUFA[TIAB] OR N3 POLYUNSATURATED FATTY ACID\*[TIAB] OR N3 OILS[TIAB] OR N-3 PUFA[TIAB] OR N-3 FATTY ACID\*[TIAB] OR N 3 FATTY ACID\*[TIAB] OR N-3 POLYUNSATURATED FATTY ACID\*[TIAB] OR N 3 POLYUNSATURATED FATTY ACID\*[TIAB] OR OMEGA 3 FATTY ACID\*[TIAB] OR N-3 OILS[TIAB] OR N 3 OILS[TIAB]) OR (COD LIVER OIL[TIAB]) OR ("FISH OILS"[MESH] OR FISH OIL\*[TIAB] OR FISH LIVER OIL\*[TIAB])) OR (((INFLIXIMAB[TW] OR MAB CA2[TIAB] OR MONOCLONAL ANTIBODY CA2[TIAB] OR REMICADE[TIAB] OR ETANERCEPT\*[TW] OR TNF RECEPTOR TYPE II-IGG FUSION PROTEIN\*[TIAB] OR TNF RECEPTOR TYPE II IGG FUSION PROTEIN\*[TIAB] OR ENBREL[TIAB] OR TNFR-FC FUSION PROTEIN\*[TIAB] OR TNFR FC FUSION PROTEIN\*[TIAB] OR TNR-001[TIAB] OR TNR 001[TIAB] OR TNT RECEPTOR FUSION PROTEIN\*[TIAB] OR ADALIMUMAB\*[TW] OR D2E7 ANTIBOD\*[TIAB] OR HUMIRA[TIAB] OR "CERTOLIZUMAB PEGOL"[MESH] OR CERTOLIZUMAB[TIAB] OR CIMZIA\*[TIAB] OR CDP 870\*[TIAB] OR "GOLIMUMAB"[SUPPLEMENTARY CONCEPT] OR GOLIMUMAB[TIAB] OR SIMPONI[TIAB]) OR ((ANTI TUMOR NECROSIS FACTOR AGENT\*[TW] OR ANTI TUMOUR NECROSIS FACTOR AGENT\*[TW] OR TNF ALPHA INHIBITOR\*[TW] OR TNF INHIBITOR\*[TW] OR TUMOUR NECROSIS FACTOR ALPHA INHIBITOR\*[TW] OR TUMOUR NECROSIS FACTOR INHIBITOR\*[TW] OR ANTI-TNF ALPHA AGENT\*[TW] OR ANTI TNF ALPHA AGENT\*[TW] OR ANTI TNF AGENT\*[TW] OR ANTI-TNF AGENT\*[TW] OR TUMOR NECROSIS FACTOR INHIBITOR\*[TW] OR TUMOR NECROSIS FACTOR ALPHA INHIBITOR\*[TW] OR TNF-ALPHA INHIBITOR\*[TW] OR CACHECTIN INHIBITOR\*[TW] OR TNF BLOCKER\*[TW] OR TNF ALPHA BLOCKER\*[TW] OR TUMOR NECROSIS FACTOR ALPHA BLOCKER\*[TW] OR TUMOUR NECROSIS FACTOR ALPHA BLOCKER\*[TW] OR TUMOR NECROSIS FACTOR BLOCKER\*[TW] OR



TUMOUR NECROSIS FACTOR BLOCKER\*[TW]) OR ("TUMOR NECROSIS FACTORS/ANTAGONISTS AND INHIBITORS"[MESH])) OR (INFLECTRA[TIAB]) OR (INFLIXIMAB-DYYB[TIAB])) OR (("INTERLEUKIN 1 RECEPTOR ANTAGONIST PROTEIN"[MESH] OR IL 1 FEBRILE INHIBITOR[TIAB] OR KINERET[TIAB] OR ANAKINRA[TIAB] OR ANTRIL[TIAB] OR IL1 FEBRILE INHIBITOR\*[TIAB] OR IL-1RA[TIAB]) OR ((ANTI-IL-1[TIAB] OR ANTI-INTERLEUKIN-1[TIAB]) OR ("INTERLEUKIN-1/ANTAGONISTS AND INHIBITORS"[MESH] OR IL-1 INHIBITOR\*[TIAB] OR IL-1 ANTAGONIST\*[TIAB] OR INTERLEUKIN 1 INHIBITOR\*[TIAB] OR INTERLEUKIN 1 ANTAGONIST\*[TIAB])) OR (ANTI-IL-1[TIAB] OR ANTI-INTERLEUKIN-1[TIAB]) OR ("INTERLEUKIN-1/ANTAGONISTS AND INHIBITORS"[MESH] OR IL-1 INHIBITOR\*[TIAB] OR IL-1 ANTAGONIST\*[TIAB] OR INTERLEUKIN 1 INHIBITOR\*[TIAB] OR INTERLEUKIN 1 ANTAGONIST\*[TIAB])))) OR (((((((("HIP"[MESH] OR HIP[TIAB] OR HIPS[TIAB] OR COXA[TIAB] OR COXAS[TIAB]) AND ("OSTEOARTHRITIS"[MH:NOEXP] OR OSTEOARTHRITIS\*[TIAB] OR OSTEOARTHRITIDES[TIAB] OR OSTEOARTHROSIS[TIAB] OR DEGENERATIVE ARTHRITIDES[TIAB] OR DEGENERATIVE ARTHRITIS[TIAB]) OR (NONINFLAMMATORY ARTHRITIS[TIAB] OR NON-INFLAMMATORY ARTHRITIS[TIAB] OR ARTHROSIS[TIAB] OR DEGENERATIVE JOINT DISEASE\*[TIAB] OR OSTEO-ARTHRITIS[TIAB] OR OSTEO-ARTHROSIS[TIAB] OR OSTEOARTHROSIS[TIAB] OR RHEUMATOID ARTHROSIS[TIAB])))) OR ("OSTEOARTHRITIS, HIP"[MESH] OR HIP OSTEOARTHRI\*[TIAB] OR COXARTHRI\*[TIAB])) OR (((("KNEE"[MESH] OR KNEE\*[TW]) AND ("OSTEOARTHRITIS"[MH:NOEXP] OR OSTEOARTHRITIS\*[TIAB] OR OSTEOARTHRITIDES[TIAB] OR OSTEOARTHROSIS[TIAB] OR DEGENERATIVE ARTHRITIDES[TIAB] OR DEGENERATIVE ARTHRITIS[TIAB]) OR (NONINFLAMMATORY ARTHRITIS[TIAB] OR NON-INFLAMMATORY ARTHRITIS[TIAB] OR ARTHROSIS[TIAB] OR DEGENERATIVE JOINT DISEASE\*[TIAB] OR OSTEO-ARTHRITIS[TIAB] OR OSTEO-ARTHROSIS[TIAB] OR OSTEOARTHROSIS[TIAB] OR RHEUMATOID ARTHROSIS[TIAB])))) OR ("OSTEOARTHRITIS, KNEE"[MESH] OR KNEE OSTEOARTH\*[TIAB])) AND (ENGLISH[LANG])) NOT (EDITORIAL\*[PT] OR COMMENT\*[PT] OR LETTER\*[PT])) NOT (ANIMAL\*[MH] NOT (ANIMAL\*[MH] AND HUMAN\*[MH])) NOT (((("CHILD"[MESH]) OR "ADOLESCENT"[MESH]) OR "INFANT"[MESH]) NOT (((("CHILD"[MESH]) OR "ADOLESCENT"[MESH]) OR "INFANT"[MESH]) AND ("ADULT"[MESH])))) AND (JOINT INJECTION\*[TIAB] OR "INJECTIONS, INTRA-ARTICULAR"[MESH] OR INTRAARTICULAR\*[TW] OR INTRA-ARTICULAR\*[TW] OR INTRA ARTICULAR\*[TW]) AND (((DEXASONE[TW] OR MAXIDEX[TW] OR MILLICORTEN[TW] OR ORADEXON[TW] OR HEXADROL[TW]) OR ("BETAMETHASONE"[MESH] OR BETAMETHASONE[TW] OR CELESTONA[TW] OR CELESTON[TW] OR CELESTONE[TW]) OR ("TRIAMCINOLONE ACETONIDE"[MESH] OR TRIAMCINOLONE[TW] OR TRICORT-40[TW] OR TRICORT 40[TW] OR KENALOG[TW] OR AZMACORT[TW] OR KENACORT[TW]) OR ("METHYLPREDNISOLONE ACETATE"[SUPPLEMENTARY CONCEPT] OR METHYLPREDNISOLONE ACETATE\*[TIAB] OR METHYLPREDNISOLONE\*[TW] OR DEPO-MEDROL[TW] OR DEPO-MEDRONE[TW]) OR (ADRENOCORTICAL HORMONE\*[TIAB]) OR ("ADRENAL CORTEX HORMONES"[PHARMACOLOGICAL ACTION]) OR ("ADRENAL CORTEX HORMONES"[MESH] OR ADRENAL CORTEX HORMONE\*[TIAB] OR CORTICOSTEROID\*[TIAB] OR CORTICOID\*[TIAB])) OR ((ADANT[TIAB] OR ADANT DISPO[TIAB] OR AMVISC PLUS[TIAB] OR ARTHREASE[TIAB] OR ARTZ[TIAB] OR BIONECT[TIAB] OR DUOVISC[TIAB] OR DUROLANE[TIAB] OR EYECON[TIAB] OR HEALON YELLOW[TIAB] OR HEALON5[TIAB] OR HEALONID[TIAB] OR HIALID[TIAB] OR HYALCON[TIAB] OR HYALEIN[TIAB] OR HYALGAN[TIAB] OR HYALOVET[TIAB] OR HYALUBRIX[TIAB] OR HYALURONATE[TIAB] OR HYALURONATE SODIUM[TIAB] OR HYALURONIC ACID COMPONENT[TIAB] OR HYLAFORM[TIAB] OR HYLAN G F 20[TIAB] OR HYLAN G-F 20[TIAB] OR HYLARTIN V[TIAB] OR HYLO-COMOD[TIAB] OR HYRUAN[TIAB] OR IALUGEN[TIAB] OR JUVEDERM[TIAB] OR LAGRICEL OFTENEO[TIAB] OR LASERVIS[TIAB] OR ME 3710[TIAB] OR

MONOVISC[TIAB] OR NA HYLAN[TIAB] OR NA-HYLAN[TIAB] OR NRD 101[TIAB] OR NRD101[TIAB] OR OPTHALIN[TIAB] OR OPTHALIN PLUS[TIAB] OR ORTHOVISC[TIAB] OR OSTENIL[TIAB] OR PERLANE[TIAB] OR POTASSIUM HYALURONATE[TIAB] OR PROVISC[TIAB] OR RADIAPLEXRX[TIAB] OR RESTYLANE[TIAB] OR SI 4402[TIAB] OR SINOVIAL[TIAB] OR SL 1010[TIAB] OR SODIUM HYALURONATE[TIAB] OR SPERM SELECT[TIAB] OR SUPARTZ[TIAB] OR SUPLASYN[TIAB] OR SYNOCROM[TIAB] OR SYNVISC[TIAB] OR TEOSYAL[TIAB] OR VISCOSEAL[TIAB] OR VISMED[TIAB] OR VITRAX[TIAB]) OR ("HYALURONIC ACID"[MESH] OR HYALURONIC ACID\*[TIAB] OR AMO VITRAX[TIAB] OR BIOLON[TIAB] OR HYALURONAN[TIAB] OR HYVISC[TIAB] OR LURONIT[TIAB] OR AMVISC[TIAB] OR HEALON[TIAB])))) OR (((("KNEE"[MESH] OR KNEE\*[TW]) AND (("OSTEOARTHRITIS"[MH:NOEXP] OR OSTEOARTHRITIS\*[TIAB] OR OSTEOARTHRITIDES[TIAB] OR OSTEOARTHROSIS[TIAB] OR DEGENERATIVE ARTHRITIDES[TIAB] OR DEGENERATIVE ARTHRITIS[TIAB]) OR (NONINFLAMMATORY ARTHRITIS[TIAB] OR NON-INFLAMMATORY ARTHRITIS[TIAB] OR ARTHROSIS[TIAB] OR DEGENERATIVE JOINT DISEASE\*[TIAB] OR OSTEO-ARTHRITIS[TIAB] OR OSTEO-ARTHROSIS[TIAB] OR OSTEOARTHROSIS[TIAB] OR RHEUMATOID ARTHROSIS[TIAB])))) OR ("OSTEOARTHRITIS, KNEE"[MESH] OR KNEE OSTEOARTH\*[TIAB]) AND ENGLISH[LANG]) AND (((("LIDOCAINE"[MESH] OR LIDOCAINE[TIAB] OR LIGNOCAINE[TIAB] OR OCTOCAINE[TIAB] OR XYLOCAINE[TIAB] OR XYLOCITIN[TIAB]) AND TOPICAL[TW]) OR ((RADIOFREQUENCY ABLATION\*[TIAB]) OR ("CATHETER ABLATION"[MESH] OR CATHETER ABLATION\*[TIAB] OR TRANSVENOUS ELECTRIC ABLATION\*[TIAB] OR TRANSVENOUS ELECTRICAL ABLATION\*[TIAB])) OR ("CAPSAICIN"[MESH] OR CAPSAICIN[TIAB] OR CAPSAICINE[TIAB] OR AXSAIN[TIAB] OR ZOSTRIX[TIAB] OR CAPZASIN[TIAB] OR NGX-4010[TIAB] OR NGX 4010[TIAB] OR CAPSIN[TIAB] OR ADLEA[TIAB] OR ALGRX 4975[TIAB] OR BIOZONE[TIAB] OR DECENOIC ACID[TIAB] OR QUTENZA[TIAB]) OR (((HYDROGEL\*[TIAB] OR TAPE[TIAB] OR TAPES[TIAB]) OR (PATCH\*[TIAB] OR PERCUTANEOUS\*[TW]) OR (OINTMENT\*[TW] OR TRANSDERMAL\*[TW] OR CUTANEOUS\*[TW] OR DERMAL ADMINISTRATION\*[TW] OR INTRAEPIDERMAL\*[TW] OR OINTMENT\*[TW] OR PASTE\*[TW] OR GEL[TIAB] OR GELS[TIAB]) OR ("ADMINISTRATION, TOPICAL"[MESH] OR TOPICAL\*[TW])) OR (TRANSCUTANEOUS\*[TIAB])) AND (("ANTI-INFLAMMATORY AGENTS, NON-STEROIDAL"[MESH]) OR (NONSTEROIDAL ANTIINFLAMMATORY AGENT\*[TIAB] OR NONSTEROIDAL ANTI-INFLAMMATORY AGENT\*[TIAB] OR NONSTEROIDAL ANTI INFLAMMATORY AGENT\*[TIAB] OR NSAID\*[TIAB] OR NON-STEROIDAL ANTI-INFLAMMATORY AGENT\*[TIAB] OR NON STEROIDAL ANTI INFLAMMATORY AGENT\*[TIAB] OR ASPIRIN-LIKE AGENT\*[TIAB] OR ANTI-INFLAMMATORY ANALGESIC\*[TIAB] OR NON-STEROIDAL ANTI-RHEUMATIC AGENT\*[TIAB] OR NON-STEROIDAL ANTIRHEUMATIC AGENT\*[TIAB] OR "ANTI-INFLAMMATORY AGENTS, NON-STEROIDAL"[MESH])))) OR (((("KNEE"[MESH] OR KNEE\*[TW]) AND (("OSTEOARTHRITIS"[MH:NOEXP] OR OSTEOARTHRITIS\*[TIAB] OR OSTEOARTHRITIDES[TIAB] OR OSTEOARTHROSIS[TIAB] OR DEGENERATIVE ARTHRITIDES[TIAB] OR DEGENERATIVE ARTHRITIS[TIAB]) OR (NONINFLAMMATORY ARTHRITIS[TIAB] OR NON-INFLAMMATORY ARTHRITIS[TIAB] OR ARTHROSIS[TIAB] OR DEGENERATIVE JOINT DISEASE\*[TIAB] OR OSTEO-ARTHRITIS[TIAB] OR OSTEO-ARTHROSIS[TIAB] OR OSTEOARTHROSIS[TIAB] OR RHEUMATOID ARTHROSIS[TIAB])))) OR ("OSTEOARTHRITIS, KNEE"[MESH] OR KNEE OSTEOARTH\*[TIAB]) AND ENGLISH[LANG]) AND (((("SHOES"[MESH] OR MODIFIED SHOE\*[TIAB] OR WEDGE SHOE\*[TIAB] OR APOS[TIAB] OR APOSTHERAPY[TIAB] OR "FOOT ORTHOSES"[MESH] OR FOOT ORTHOS\*[TIAB] OR FOOT ORTHOT\*[TIAB] OR FOOT ARCH SUPPORT\*[TIAB] OR SHOE INSERT\*[TIAB] OR ORTHOTIC INSOLE\*[TIAB] OR WEDGE ORTHOTIC\*[TIAB] OR WEDGE INSOLE\*[TIAB] OR LWI[TIAB] OR LWIS[TIAB]) OR ("ORTHOTIC DEVICES"[MESH:NOEXP] AND (FOOT[TW] OR FEET[TW] OR KNEE\*[TW])) OR (RETRAINING[TIAB]) OR

(TRAINING[TW] AND GAIT[TW])) OR (BRACE[TW] OR BRACES[TW] OR BRACING[TW] OR BRACED[TW])) OR (((("OSTEOARTHRITIS"[MH:NOEXP] OR OSTEOARTH\*[TIAB] OR DEGENERATIVE ARTHRITIDES[TIAB] OR DEGENERATIVE ARTHRITIS[TIAB] OR NONINFLAMMATORY ARTHRITIS[TIAB] OR NON-INFLAMMATORY ARTHRITIS[TIAB] OR ARTHROSIS[TIAB] OR DEGENERATIVE JOINT DISEASE\*[TIAB] OR OSTEO-ARTHRITIS[TIAB] OR OSTEO-ARTHROSIS[TIAB] OR RHEUMATOID ARTHROSIS[TIAB] OR OSTEOARTHRITIS, KNEE[MH]) AND ((FEMORAL PATELLAR[TW] OR FEMUR PATELLAR[TW]) OR ("PATELLOFEMORAL JOINT"[MESH] OR PATELLOFEMORAL[TW] OR PATELLO-FEMORAL[TW] OR FEMOROPATELLAR[TW] OR FEMORO-PATELLAR[TW])) AND ENGLISH[LANG]) AND ((BRACE[TW] OR BRACES[TW] OR BRACING[TW] OR BRACED[TW]) OR ("BANDAGES"[MESH] OR BANDAGE\*[TIAB]) OR (TAPE[TW] OR TAPES[TW] OR TAPING[TW]))) OR (((2017/10/15 : 2018/08/01[EDAT]) AND (((("OSTEOARTHRITIS"[MH:NOEXP] OR OSTEOARTHRITIS\*[TIAB] OR OSTEOARTHRITIDES[TIAB] OR OSTEOARTHROSIS[TIAB] OR DEGENERATIVE ARTHRITIDES[TIAB] OR DEGENERATIVE ARTHRITIS[TIAB]) OR (NONINFLAMMATORY ARTHRITIS[TIAB] OR NON-INFLAMMATORY ARTHRITIS[TIAB] OR ARTHROSIS[TIAB] OR DEGENERATIVE JOINT DISEASE\*[TIAB] OR OSTEO-ARTHRITIS[TIAB] OR OSTEO-ARTHROSIS[TIAB] OR OSTEOARTHROSIS[TIAB] OR RHEUMATOID ARTHROSIS[TIAB])) AND ("HAND"[MESH] OR HAND[TIAB] OR HANDS[TIAB] OR FINGER\*[TW] OR THUMB\*[TW] OR METACARP\*[TW] OR WRIST[TW]) AND (ENGLISH[LANG])) NOT (ANIMAL\*[MH] NOT (ANIMAL\*[MH] AND HUMAN\*[MH])) NOT (((("CHILD"[MESH]) OR "ADOLESCENT"[MESH]) OR "INFANT"[MESH]) NOT (((("CHILD"[MESH]) OR "ADOLESCENT"[MESH]) OR "INFANT"[MESH]) AND ("ADULT"[MESH])))) NOT (EDITORIAL\*[PT] OR COMMENT\*[PT] OR LETTER\*[PT])) AND (((NONSTEROIDAL ANTIINFLAMMATORY AGENT\*[TW] OR NONSTEROIDAL ANTI INFLAMMATORY AGENT\*[TW] OR NON-STEROIDAL ANTI-INFLAMMATORY AGENT\*[TW] OR NON STEROIDAL ANTI INFLAMMATORY AGENT\*[TW] OR ASPIRIN-LIKE AGENT\*[TW] OR ANTI-INFLAMMATORY ANALGESIC\*[TW] OR NON-STEROIDAL ANTI-RHEUMATIC AGENT\*[TW] OR NON-STEROIDAL ANTIRHEUMATIC AGENT\*[TW]) OR ("ANTI-INFLAMMATORY AGENTS, NON-STEROIDAL"[PHARMACOLOGICAL ACTION]) OR ("ANTI-INFLAMMATORY AGENTS, NON-STEROIDAL"[MESH] OR NSAID\*[TW])) OR (A 771726[TW] OR ACECLOFENAC[TW] OR ACEMETACIN[TW] OR ACETOSYRINGONE[TW] OR ACETOVANILLONE[TW] OR ACETYLSALICYLIC ACID LYSINATE[TW] OR ADAPALENE[TW] OR ALCLOFENAC[TW] OR ALMINOPROFEN[TW] OR AMIPRILOSE[TW] OR AMPYRONE[TW] OR ANDROGRAPHOLIDE[TW] OR ANISODAMINE[TW] OR ANISODINE[TW] OR ANTIFLAMMIN P2[TW] OR ANTIPYRINE[TW] OR APAZONE[TW] OR APREMILAST[TW] OR ARTEPARON[TW] OR ARTHROTEC[TW] OR ASPIRIN[TW] OR ATRINOSITOL[TW] OR AZULENE[TW] OR BAICALIN[TW] OR BALSALAZIDE[TW] OR BENDAZAC[TW] OR BENORILATE[TW] OR BENOXAPROFEN[TW] OR BENZOBARBITAL[TW] OR BERBAMINE[TW] OR BETULINIC ACID[TW] OR BEVONIUM[TW] OR BIPHENYLYLACETIC ACID[TW] OR BOLDINE[TW] OR BREDININ[TW] OR BROMFENAC[TW] OR BUCILLAMINE[TW] OR BUFEXAMAC[TW] OR BUMADIZONE[TW] OR BUTIBUFEN[TW] OR CARBASPIRIN CALCIUM[TW] OR CARBON FIBER[TW] OR CARPROFEN[TW] OR CARYOPHYLLENE[TW] OR CASTANOSPERMINE[TW] OR CDP 571[TW] OR CELECOXIB[TW] OR CEPHARANTHINE[TW] OR CHLOROQUINE DIPHOSPHATE[TW] OR CHOLINE MAGNESIUM TRISALICYLATE[TW] OR CHRYSAROBIN[TW] OR CLONIXIN[TW] OR CP 96345[TW] OR CURCUMIN[TW] OR DAURICINE[TW] OR DEXKETOPROFEN TROMETAMOL[TW] OR DICLOFENAC[TW] OR DICLOFENAC HYDROXYETHYLPYRROLIDINE[TW] OR DIFENPIRAMIDE[TW] OR DIFLUNISAL[TW] OR DIMEPHOSPHON[TW] OR DIPYRONE[TW] OR DIUCIFON[TW] OR DROXICAM[TW] OR DUP 697[TW] OR

EBSELEN[TW] OR EFAMOL[TW] OR ELTENAC[TW] OR ENFENAMIC ACID[TW] OR EPIRIZOLE[TW] OR ETANERCEPT[TW] OR ETHENZAMIDE[TW] OR ETHONIUM[TW] OR ETODOLAC[TW] OR ETOFENAMATE[TW] OR ETORICOXIB[TW] OR FENAMIC ACID[TW] OR FENBUFEN[TW] OR FENCLOFENAC[TW] OR FENFLUMIZOLE[TW] OR FENOPROFEN[TW] OR FENTIAZAC[TW] OR FEPRADINOL[TW] OR FEPRAZONE[TW] OR FERULIC ACID[TW] OR FLOCTAFENINE[TW] OR FLOSULIDE[TW] OR FLUNIXIN[TW] OR FLUNIXIN MEGLUMINE[TW] OR FLUNOXAPROFEN[TW] OR FLUROQUAZONE[TW] OR FLURBIPROFEN[TW] OR FLURBIPROFEN AXETIL[TW] OR FR 167653[TW] OR FR 173657[TW] OR GLUCAMETACIN[TW] OR GUACETISAL[TW] OR HELENALIN[TW] OR HELIODERMIN[TW] OR HEMODES[TW] OR HIGENAMINE[TW] OR IBUPROFEN[TW] OR IBUPROXAM[TW] OR ICATIBANT[TW] OR IH 764-3[TW] OR IMIDAZOLE-2-HYDROXYBENZOATE[TW] OR INDOBUFEN[TW] OR INDOMETHACIN[TW] OR INDOPROFEN[TW] OR IODOANTIPYRINE[TW] OR ISOXICAM[TW] OR KEBUZONE[TW] OR KETOPROFEN[TW] OR KETOPROFEN LYSINE[TW] OR KETOROLAC[TW] OR L 745337[TW] OR L 778736[TW] OR LIPOXIN A4[TW] OR LIPOXIN B4[TW] OR LISOFYLLINE[TW] OR LOBENZARIT[TW] OR LONAZOLAC[TW] OR LORNOXICAM[TW] OR LOXOPROFEN[TW] OR LUMIRACOXIB[TW] OR MAGNESIUM SALICYLATE[TW] OR MAGNOLOL[TW] OR MANOALIDE[TW] OR MASOPROCOL[TW] OR MECLOFENAMIC ACID\*[TW] OR MEFENAMIC ACID\*[TW] OR MELOXICAM[TW] OR MESALAMINE[TW] OR MOFEBUTAZONE[TW] OR MOFEZOLAC[TW] OR NABUMETONE[TW] OR NAFAMOSTAT[TW] OR NAPROXEN[TW] OR NEBACETIN[TW] OR NEPAFENAC[TW] OR NIFENAZONE[TW] OR NIFLUMIC ACID[TW] OR NIMESULIDE[TW] OR NITROASPIRIN[TW] OR OLOPATADINE HYDROCHLORIDE[TW] OR OLSALAZINE[TW] OR OLVANIL[TW] OR OREN GEDOKU TO[TW] OR ORGOTEIN[TW] OR OXAPROZIN[TW] OR OXYPHENBUTAZONE[TW] OR PALMIDROL[TW] OR PARECOXIB[TW] OR PARTHENOLIDE[TW] OR PEONIFLORIN[TW] OR PHENIDONE[TW] OR PHENYLBUTAZONE[TW] OR PIMECROLIMUS[TW] OR PIRFENIDONE[TW] OR PIROXICAM[TW] OR PIROXICAM-BETA-CYCLODEXTRIN[TW] OR PIRPROFEN[TW] OR PROGLUMETACIN[TW] OR PROPACETAMOL[TW] OR PROPIONYL CARNITINE[TW] OR PROPYPHENAZONE[TW] OR PROQUAZONE[TW] OR PYRANOPROFEN[TW] OR PYRAZOLONE[TW] OR PYROGENAL[TW] OR RESVERATROL[TW] OR ROFECOXIB[TW] OR ROSMARINIC ACID[TW] OR RUMALON[TW] OR SAIKO-KEISHI-TO[TW] OR SAIKOSAPONIN[TW] OR SALICIN[TW] OR SALICYLAMIDE[TW] OR SALICYLATES[TW] OR SALICYLSALICYLIC ACID[TW] OR SB 203580[TW] OR SC 299[TW] OR SC 41930[TW] OR SC 560[TW] OR SEMAPIMOD[TW] OR SERATRODAST[TW] OR SERRATIOPEPTIDASE[TW] OR SHIKONIN[TW] OR SINAPALDEHYDE[TW] OR SODIUM SALICYLATE\*[TW] OR ST 679[TW] OR SULFASALAZINE[TW] OR SULINDAC[TW] OR SULINDAC SULFIDE[TW] OR SULINDAC SULFONE[TW] OR SUPROFEN[TW] OR SUXIBUZONE[TW] OR TANSHINONE[TW] OR TAXIFOLIN[TW] OR TENIDAP[TW] OR TENOXICAM[TW] OR TEPOXALIN[TW] OR TIAPROFENIC ACID[TW] OR TIARAMIDE[TW] OR TINORIDINE[TW] OR TOLFENAMIC ACID[TW] OR TOLMETIN[TW] OR TRANILAST[TW] OR TRIBENOSIDE[TW] OR URSOLIC ACID[TW] OR VALDECOXIB[TW] OR ZILEUTON[TW] OR ZOMEPIRAC[TW])) OR ((HYDROXYACETANILIDE[TIAB] OR APAP[TIAB] OR P-ACETAMIDOPHENOL[TIAB] OR P-HYDROXYACETANILIDE[TIAB] OR PARACETAMOL[TIAB] OR ACETAMIDOPHENOL[TIAB] OR ACEPHEN[TIAB] OR TYLENOL[TIAB] OR ANACIN\*[TIAB] OR PANADOL[TIAB] OR ACAMOL[TIAB]) OR ("ACETAMINOPHEN"[MESH] OR ACETAMINOPHEN[TIAB])) OR ((GLUCOSAMIDE[TIAB] OR D GLUCOSE AMINE[TIAB] OR GLUCOSE AMINE[TIAB] OR NSC 758[TIAB]) OR (2-AMINO-2-DEOXYGLUCOSE[TIAB] OR 2 AMINO 2 DEOXYGLUCOSE[TIAB] OR DONA[TIAB] OR DONA S[TIAB]) OR "GLUCOSAMINE"[MESH] OR

GLUCOSAMINE[TIAB] OR 2-AMINO-2-DEOXYGLUCOSE[TIAB] OR 2 AMINO 2 DEOXYGLUCOSE[TIAB] OR DONA[TIAB] OR DONA S[TIAB]) OR ("CHONDROITIN"[MESH] OR CHONDROITIN[TIAB]) OR ((ALFENTANIL[TW] OR ALPHAPRODINE[TW] OR BETA-CASOMORPHINS[TW] OR BUPRENORPHINE[TW] OR BUTORPHANOL[TW] OR CARFENTANIL[TW] OR CODEINE[TW] OR DERMORPHIN[TW] OR DEXTROMORAMIDE[TW] OR DEXTROPROPOXYPHENE[TW] OR DEZOCINE[TW] OR DIHYDROCODEINE[TW] OR DIHYDROMORPHINE[TW] OR DIPHENOXYLATE[TW] OR ENDOMORPHIN 1[TW] OR ENDOMORPHIN 2[TW] OR ESEROLINE[TW] OR ETHYLKETOCYCLAZOCINE[TW] OR ETHYLMORPHINE[TW] OR ETORPHINE[TW] OR FENTANYL[TW] OR HEROIN[TW] OR HYDROCODONE[TW] OR HYDROMORPHONE[TW] OR KETOBEMIDONE[TW] OR LEVORPHANOL[TW] OR LOFENTANIL[TW] OR MEPERIDINE[TW] OR MEPTAZINOL[TW] OR METHADONE[TW] OR METHADYL ACETATE[TW] OR MORPHINE[TW] OR NALBUPHINE[TW] OR NOCISTATIN[TW] OR NORMETHADONE[TW] OR OPIATE ALKALOIDS[TW] OR OPIUM[TW] OR OXYCODONE[TW] OR OXYMORPHONE[TW] OR PARACY METHADOL[TW] OR PENTAZOCINE[TW] OR PHENAZOCINE[TW] OR PHENOPERIDINE[TW] OR PIRINITRAMIDE[TW] OR PROMEDOL[TW] OR PROTOPINE[TW] OR REMIFENTANIL[TW] OR SUFENTANIL[TW] OR TILIDINE[TW] OR OXYCONTIN[TW]) OR ((ALGOPAN[TIAB] OR BIOPON[TIAB] OR LAUDANUM[TIAB] OR NEPENTHE[TIAB] OR OMNOPON[TIAB] OR OPIAL[TIAB] OR OPIUM[TIAB] OR OPON[TIAB] OR PANTOPON[TIAB] OR PAPAVERETUM[TIAB] OR PAVON[TIAB] OR TETRAPON[TIAB]) OR ("ANALGESICS, OPIOID"[PHARMACOLOGICAL ACTION]) OR (OPIATE\*[TIAB]) OR ("ANALGESICS, OPIOID"[MESH] OR OPIOID\*[TIAB])) OR ((TRAMADOL\*[TIAB] OR TRAMUNDIN[TIAB] OR DALGIC OR K-315[TIAB] OR K 315[TIAB] OR K315[TIAB] OR NOBLIGAN[TIAB] OR ZYTRAM[TIAB] OR TIRAL[TIAB] OR TOPALGIC[TIAB] OR TRAMA ABZ[TIAB] OR TRAMA KD[TIAB] OR TRAMA DORSCH[TIAB] OR RANITIDIN 1A PHARMA[TIAB] OR TRAMA 1A PHARMA[TIAB] OR ULTRAM[TIAB] OR ZYDOL[TIAB] OR TRAMADOLOR[TIAB] OR TRAMAL[TIAB] OR ADOLONTA[TIAB] OR CONTRAMAL[TIAB]) OR ("TRAMADOL"[MESH])) OR ("DULOXETINE HYDROCHLORIDE"[MESH] OR DULOXETINE[TIAB] OR LY 248686[TIAB] OR LY-248686[TIAB] OR CYMBALTA[TIAB]) OR ((((((NERVE GROWTH FACTOR ANTISERUM[TIAB] OR NGF ANTISERUM[TIAB]) OR (ANTISERUM NGF[TIAB]) OR (ANTI-NERVE GROWTH FACTOR\*[TIAB]) OR ("TANEZUMAB"[SUPPLEMENTARY CONCEPT] OR TANEZUMAB[TIAB]) OR (NERVE GROWTH FACTOR ANTIBOD\*[TIAB]) OR ("NERVE GROWTH FACTORS/ANTAGONISTS AND INHIBITORS"[MESH]) OR (ANTI-NGF[TIAB])) OR ("FULRANUMAB"[SUPPLEMENTARY CONCEPT] OR FULRANUMAB[TIAB])) OR (NERVE GROWTH FACTOR INHIBITOR\*[TIAB] OR NERVE GROWTH FACTOR ANTAGONIST\*[TIAB] OR NERVE GROWTH FACTOR BLOCKER\*[TIAB] OR NGF INHIBITOR\*[TIAB] OR NGF ANTAGONIST\*[TIAB] OR NGF BLOCKER\*[TIAB])) OR (NGF-AB[TIAB])) OR (FASINUMAB[TIAB])) OR (((HYDROGEL\*[TIAB] OR TAPE[TIAB] OR TAPES[TIAB]) OR (PATCH\*[TIAB] OR PERCUTANEOUS\*[TW]) OR (OINTMENT\*[TW] OR TRANSDERMAL\*[TW] OR CUTANEOUS\*[TW] OR DERMAL ADMINISTRATION\*[TW] OR INTRAEPIDERMAL\*[TW] OR OINTMENT\*[TW] OR PASTE\*[TW] OR GEL[TIAB] OR GELS[TIAB]) OR ("ADMINISTRATION, TOPICAL"[MESH] OR TOPICAL\*[TW])) OR (TRANSCUTANEOUS\*[TIAB])) AND (("ANTI-INFLAMMATORY AGENTS, NON-STEROIDAL"[MESH]) OR (NONSTEROIDAL ANTIINFLAMMATORY AGENT\*[TIAB] OR NONSTEROIDAL ANTI-INFLAMMATORY AGENT\*[TIAB] OR NONSTEROIDAL ANTI INFLAMMATORY AGENT\*[TIAB] OR NSAID\*[TIAB] OR NON-STEROIDAL ANTI-INFLAMMATORY AGENT\*[TIAB] OR NON STEROIDAL ANTI INFLAMMATORY AGENT\*[TIAB] OR ASPIRIN-LIKE AGENT\*[TIAB] OR ANTI-INFLAMMATORY ANALGESIC\*[TIAB] OR NON-STEROIDAL ANTI-RHEUMATIC AGENT\*[TIAB] OR NON-STEROIDAL ANTIRHEUMATIC AGENT\*[TIAB] OR "ANTI-INFLAMMATORY AGENTS, NON-

STEROIDAL"[MESH])) OR ("CAPSAICIN"[MESH] OR CAPSAICIN[TIAB] OR CAPSAICINE[TIAB] OR AXSAIN[TIAB] OR ZOSTRIX[TIAB] OR CAPZASIN[TIAB] OR NGX-4010[TIAB] OR NGX 4010[TIAB] OR CAPSIN[TIAB] OR ADLEA[TIAB] OR ALGRX 4975[TIAB] OR BIOZONE[TIAB] OR DECENOIC ACID[TIAB] OR QUTENZA[TIAB]) OR ("IONTOPHORESIS"[MESH] OR IONTOPHORES\*[TIAB]) OR (((JOINT INJECTION\*[TIAB]) OR (("INJECTIONS, INTRA-ARTICULAR"[MESH]) OR (INTRAARTICULAR\*[TW] OR INTRA-ARTICULAR\*[TW] OR INTRA ARTICULAR\*[TW]))) AND (((ADANT[TIAB] OR ADANT DISPO[TIAB] OR AMVISC PLUS[TIAB] OR ARTHREASE[TIAB] OR ARTZ[TIAB] OR BIONECT[TIAB] OR DUOVISC[TIAB] OR DUROLANE[TIAB] OR EYECON[TIAB] OR HEALON YELLOW[TIAB] OR HEALON5[TIAB] OR HEALONID[TIAB] OR HIALID[TIAB] OR HYALCON[TIAB] OR HYALEIN[TIAB] OR HYALGAN[TIAB] OR HYALOVET[TIAB] OR HYALUBRIX[TIAB] OR HYALURONATE[TIAB] OR HYALURONATE SODIUM[TIAB] OR HYALURONIC ACID COMPONENT[TIAB] OR HYLAFORM[TIAB] OR HYLAN G F 20[TIAB] OR HYLAN G-F 20[TIAB] OR HYLARTIN V[TIAB] OR HYLO-COMOD[TIAB] OR HYRUAN[TIAB] OR IALUGEN[TIAB] OR JUVEDERM[TIAB] OR LAGRICEL OFTENOTIAB] OR LASERVIS[TIAB] OR ME 3710[TIAB] OR MONOVISC[TIAB] OR NA HYLAN[TIAB] OR NA-HYLAN[TIAB] OR NRD 101[TIAB] OR NRD101[TIAB] OR OPHTHALIN[TIAB] OR OPHTHALIN PLUS[TIAB] OR ORTHOVISC[TIAB] OR OSTENIL[TIAB] OR PERLANE[TIAB] OR POTASSIUM HYALURONATE[TIAB] OR PROVISC[TIAB] OR RADIAPLEXRX[TIAB] OR RESTYLANE[TIAB] OR SI 4402[TIAB] OR SINOVIOL[TIAB] OR SL 1010[TIAB] OR SODIUM HYALURONATE[TIAB] OR SPERM SELECT[TIAB] OR SUPARTZ[TIAB] OR SUPLASYN[TIAB] OR SYNOCROM[TIAB] OR SYNVISC[TIAB] OR TEOSYAL[TIAB] OR VISCOSEAL[TIAB] OR VISMED[TIAB] OR VITRAX[TIAB]) OR ("HYALURONIC ACID"[MESH] OR HYALURONIC ACID\*[TIAB] OR AMO VITRAX[TIAB] OR BIOLON[TIAB] OR HYALURONAN[TIAB] OR HYVISC[TIAB] OR LURONIT[TIAB] OR AMVISC[TIAB] OR HEALON[TIAB])) OR ((DEXASONE[TW] OR MAXIDEX[TW] OR MILLICORTEN[TW] OR ORADEXON[TW] OR HEXADROL[TW]) OR ("BETAMETHASONE"[MESH] OR BETAMETHASONE[TW] OR CELESTONA[TW] OR CELESTON[TW] OR CELESTONE[TW]) OR ("TRIAMCINOLONE ACETONIDE"[MESH] OR TRIAMCINOLONE[TW] OR TRICORT-40[TW] OR TRICORT 40[TW] OR KENALOG[TW] OR AZMACORT[TW] OR KENACORT[TW]) OR ("METHYLPREDNISOLONE ACETATE"[SUPPLEMENTARY CONCEPT] OR METHYLPREDNISOLONE ACETATE\*[TIAB] OR METHYLPREDNISOLONE\*[TW] OR DEPO-MEDROL[TW] OR DEPO-MEDRONE[TW]) OR (ADRENOCORTICAL HORMONE\*[TIAB]) OR ("ADRENAL CORTEX HORMONES"[PHARMACOLOGICAL ACTION]) OR ("ADRENAL CORTEX HORMONES"[MESH] OR ADRENAL CORTEX HORMONE\*[TIAB] OR CORTICOSTEROID\*[TIAB] OR CORTICOID\*[TIAB])) OR (("EXERCISE"[MESH] OR EXERCISE\*[TW] OR PHYSICAL ACTIVIT\*[TW]) OR ("EXERCISE THERAPY"[MESH])) OR ((PARAFFINUM[TIAB]) OR ("PARAFFIN"[MESH] OR PARAFFIN\*[TW])) OR (((HEAT TREATMENT\*[TIAB] OR THERMAL THERAP\*[TIAB]) OR ("DIATHERMY"[MESH] OR DIATHERM\*[TIAB]) OR ((HYPERTHERMIC THERAP\*[TIAB]) OR (HEAT THERAP\*[TIAB]) OR (THERAPEUTIC HEAT[TIAB]) OR (((HEAT APPLICATION\*[TIAB]) OR (("HYPERTHERMIA, INDUCED"[MESH] OR THERMOTHERAP\*[TW]) OR ((LOCAL HEAT[TIAB]) OR ("HOT TEMPERATURE/THERAPEUTIC USE"[MESH]) OR (HOT PACK\*)))) OR (HEATING PAD\*[TIAB])))) OR (DIATHERAP\*[TIAB] OR DIATHERMIA[TIAB] OR INDUCTOTHERMY[TIAB])) OR ((COLD BATH\*[TIAB] OR CRYOGENIC THERAP\*[TIAB] OR CRYOTHERM\*[TIAB] OR CRYO-TREATMENT\*[TIAB] OR CRYOTREATMENT\*[TIAB]) OR (COOLING THERAP\*[TIAB]) OR ((COLD TREATMENT\*[TIAB] OR THERAPEUTIC COOLING[TIAB]) OR ((("CRYOTHERAPY"[MESH] OR CRYOTHERAP\*[TIAB] OR COLD THERAP\*[TIAB] OR HYPOTHERM\*[TW]) OR (ICE THERAP\*[TIAB] OR ICE PACK\*[TIAB])))) OR ((("HEALTH EDUCATION"[MESH] OR HEALTH EDUCATION[TIAB] OR CONSUMER HEALTH INFORMATION[TW]) OR ((EDUCATING PATIENT\*[TIAB]) OR

("PATIENT EDUCATION HANDOUT"[PUBLICATION TYPE]) OR ((EDUCATION PROGRAM\*[TIAB] OR EDUCATIONAL PROGRAM\*[TIAB] OR TRAINING PROGRAM\*) AND (PATIENT[TIAB] OR PATIENTS[TIAB] OR PATIENT-CENTERED[TIAB] OR PATIENT-FOCUSED[TIAB])) OR ("EDUCATION OF PATIENT"[TIAB]) OR ("PATIENT EDUCATION AS TOPIC"[MH:NOEXP] OR PATIENT EDUCATION\*[TIAB])) OR (("HAND/THERAPY"[MESH]) OR ((HAND THERAP\*[TIAB]) OR ("OCCUPATIONAL THERAPY"[MESH] OR OCCUPATIONAL THERAP\*[TIAB] OR PHYSIOTHERAP\*[TW] OR ERGOTHERAP\*[TIAB])) OR ("ACUPUNCTURE THERAPY"[MESH]) OR ("ACUPUNCTURE"[MESH] OR ACUPUNCTURE\*[TIAB] OR PHARMACOPUNCTURE\*[TIAB])) OR (((FINGER\*[TIAB] OR THUMB\*[TIAB]) OR ("THUMB"[MESH]) OR "FINGERS"[MESH] OR DIGIT\*[TW])) AND ((ORTHOSIS[TIAB]) OR ("BRACES"[MESH] OR BRACE\*[TIAB]) OR ("ATHLETIC TAPE"[MESH] OR KINESIOTAP\*[TIAB] OR ORTHOTIC TAPE\*[TIAB]) OR ("ORTHOTIC DEVICES"[MH:NOEXP] OR ORTHOTIC DEVICE\*[TIAB] OR ORTHOSE\*[TIAB] OR PARAPODIUM\*[TIAB])) OR ("GLOVES, PROTECTIVE"[MH:NOEXP] OR GLOVE\*[TW]) OR ("RESISTANCE TRAINING"[MESH] OR RESISTANCE TRAINING[TIAB] OR STRENGTH TRAINING[TIAB] OR STRENGTHENING PROGRAM\*[TIAB]) OR (SPICA[TIAB]) OR ("SPLINTS"[MESH] OR SPLINT\*[TIAB] OR STATIC ORTHOS\*[TIAB]))))

## EMBASE

| Syntax Guide for Embase                                              |                                                                                    |
|----------------------------------------------------------------------|------------------------------------------------------------------------------------|
| /exp                                                                 | Explode. Includes Embase subject headings and the narrower terms in the hierarchy. |
| ti,ab                                                                | Includes words in the title or abstracts                                           |
| de                                                                   | Includes words in Embase subject headings                                          |
| Boolean Operators                                                    |                                                                                    |
| OR = retrieves results that include at least one of the search terms | AND = retrieves results that include all the search terms                          |
| NOT = excludes the retrieval of terms from the search                |                                                                                    |

### 1. HIP/KNEE

(HIP:TI,AB,DE OR HIPS:TI,AB,DE OR COXA:TI,AB,DE OR COXAS:TI,AB,DE OR KNEE\*:TI,AB,DE) AND (OSTEOARTHRI\*:TI,AB,DE OR 'DEGENERATIVE ARTHRITIDES':TI,AB,DE OR 'DEGENERATIVE ARTHRITIS':TI,AB,DE OR 'NONINFLAMMATORY ARTHRITIS':TI,AB,DE OR 'NON-INFLAMMATORY ARTHRITIS':TI,AB,DE OR ARTHROSIS:TI,AB,DE OR 'DEGENERATIVE JOINT DISEASE':TI,AB,DE OR 'OSTEO-ARTHRI\*:TI,AB,DE OR 'OSTEO-ARTHROSIS':TI,AB,DE OR OSTEOARTHROSIS:TI,AB,DE OR 'RHEUMATOID ARTHROSIS':TI,AB,DE OR COXARTH\*:TI,AB,DE) AND ('JOINT INJECTION':TI,AB,DE OR INTRAARTICULAR\*:TI,AB,DE OR 'INTRA-ARTICULAR':TI,AB,DE OR 'INTRA ARTICULAR':TI,AB,DE) AND (DEXASONE:TI,AB,DE OR MAXIDEX:TI,AB,DE OR MILLICORTEN:TI,AB,DE OR ORADEXON:TI,AB,DE OR HEXADROL:TI,AB,DE OR

BETAMETHASONE:TI,AB,DE OR CELESTONA:TI,AB,DE OR CELESTON:TI,AB,DE OR CELESTONE:TI,AB,DE OR 'TRIAMCINOLONE ACETONIDE':TI,AB,DE OR TRIAMCINOLONE:TI,AB,DE OR 'TRICORT-40':TI,AB,DE OR 'TRICORT 40':TI,AB,DE OR KENALOG:TI,AB,DE OR AZMACORT:TI,AB,DE OR KENACORT:TI,AB,DE OR 'METHYLPREDNISOLONE ACETATE':TI,AB,DE OR METHYLPREDNISOLONE\*:TI,AB,DE OR 'DEPO-MEDROL':TI,AB,DE OR 'DEPO-MEDRONE':TI,AB,DE OR 'ADRENOCORTICAL HORMONE':TI,AB,DE OR 'ADRENAL CORTEX HORMONES':TI,AB,DE OR 'ADRENAL CORTEX HORMONE':TI,AB,DE OR CORTICOSTEROID\*:TI,AB,DE OR CORTICOID\*:TI,AB,DE OR STEROID\*:TI,AB,DE OR ADANT:TI,AB,DE OR 'ADANT DISPO':TI,AB,DE OR ARTHREASE:TI,AB,DE OR ARTZ:TI,AB,DE OR BIONECT:TI,AB,DE OR DUOVISC:TI,AB,DE OR DUROLANE:TI,AB,DE OR EYECON:TI,AB,DE OR 'HEALON YELLOW':TI,AB,DE OR HEALON5:TI,AB,DE OR HEALONID:TI,AB,DE OR HIALID:TI,AB,DE OR HYALCON:TI,AB,DE OR HYALEIN:TI,AB,DE OR HYALGAN:TI,AB,DE OR HYALOVET:TI,AB,DE OR HYALUBRIX:TI,AB,DE OR HYALURONATE:TI,AB,DE OR 'HYALURONATE SODIUM':TI,AB,DE OR HYLAFORM:TI,AB,DE OR 'HYLAN G F 20':TI,AB,DE OR 'HYLAN G-F 20':TI,AB,DE OR 'HYLARTIN V':TI,AB,DE OR 'HYLO-COMOD':TI,AB,DE OR HYRUAN:TI,AB,DE OR IALUGEN:TI,AB,DE OR JUVEDERM:TI,AB,DE OR 'LAGRICEL OFTEN0':TI,AB,DE OR LASERVIS:TI,AB,DE OR 'ME 3710':TI,AB,DE OR MONOVISC:TI,AB,DE OR 'NA HYLAN':TI,AB,DE OR 'NA-HYLAN':TI,AB,DE OR 'NRD 101':TI,AB,DE OR NRD101:TI,AB,DE OR OPTHALIN:TI,AB,DE OR ORTHOVISC:TI,AB,DE OR OSTENIL:TI,AB,DE OR PERLANE:TI,AB,DE OR 'POTASSIUM HYALURONATE':TI,AB,DE OR PROVISC:TI,AB,DE OR RADIAPLEXRX:TI,AB,DE OR RESTYLANE:TI,AB,DE OR 'SI 4402':TI,AB,DE OR SINOVIAL:TI,AB,DE OR 'SL 1010':TI,AB,DE OR 'SODIUM HYALURONATE':TI,AB,DE OR 'SPERM SELECT':TI,AB,DE OR SUPARTZ:TI,AB,DE OR SUPLASYN:TI,AB,DE OR SYNOCROM:TI,AB,DE OR SYNVISC:TI,AB,DE OR TEOSYAL:TI,AB,DE OR VISCOSEAL:TI,AB,DE OR VISMED:TI,AB,DE OR VITRAX:TI,AB,DE OR 'HYALURONIC ACID':TI,AB,DE OR 'AMO VITRAX':TI,AB,DE OR BIOLON:TI,AB,DE OR HYALURONAN:TI,AB,DE OR HYVISC:TI,AB,DE OR LURONIT:TI,AB,DE OR AMVISC:TI,AB,DE OR HEALON:TI,AB,DE) AND [EMBASE]/LIM NOT ([EMBASE]/LIM AND [MEDLINE]/LIM) AND ('ARTICLE'/IT OR 'ARTICLE IN PRESS'/IT OR 'REVIEW'/IT) OR (KNEE\*:TI,AB,DE AND (OSTEOARTHRITIS\*:TI,AB,DE OR OSTEOARTHRITIDES:TI,AB,DE OR 'DEGENERATIVE ARTHRITIDES':TI,AB,DE OR 'DEGENERATIVE ARTHRITIS':TI,AB,DE OR 'NONINFLAMMATORY ARTHRITIS':TI,AB,DE OR 'NON-INFLAMMATORY ARTHRITIS':TI,AB,DE OR ARTHROSIS:TI,AB,DE OR 'DEGENERATIVE JOINT DISEASE':TI,AB,DE OR 'OSTEO-ARTHRITIS':TI,AB,DE OR 'OSTEO-ARTHRITIS':TI,AB,DE OR OSTEOARTHROSIS:TI,AB,DE OR 'RHEUMATOID ARTHROSIS':TI,AB,DE) AND [ENGLISH]/LIM NOT ('ANIMAL'/EXP NOT ('ANIMAL'/EXP AND 'HUMAN'/EXP)) NOT ('JUVENILE'/EXP NOT ('JUVENILE'/EXP AND 'ADULT'/EXP)) NOT ('EDITORIAL'/EXP OR 'LETTER'/EXP OR 'CASE REPORT'/EXP) AND [EMBASE]/LIM NOT ([EMBASE]/LIM AND [MEDLINE]/LIM) AND ('ARTICLE'/IT OR 'ARTICLE IN PRESS'/IT OR 'REVIEW'/IT) AND ((HYDROGEL\*:TI,AB,DE OR TAPE:TI,AB,DE OR TAPES:TI,AB,DE OR



PATCH\*:TI,AB,DE OR PERCUTANEOUS\*:TI,AB,DE OR OINTMENT\*:TI,AB,DE OR  
TRANSDERMAL\*:TI,AB,DE OR CUTANEOUS\*:TI,AB,DE OR 'DERMAL  
ADMINISTRATION':TI,AB,DE OR INTRAEPIDERMAL\*:TI,AB,DE OR PASTE\*:TI,AB,DE  
OR GEL:TI,AB,DE OR GELS:TI,AB,DE OR TOPICAL\*:TI,AB,DE OR  
TRANSCUTANEOUS\*:TI,AB,DE) AND ('NONSTEROIDAL ANTIINFLAMMATORY  
AGENT':TI,AB,DE OR 'NONSTEROIDAL ANTI-INFLAMMATORY AGENT':TI,AB,DE OR  
'NONSTEROIDAL ANTI INFLAMMATORY AGENT':TI,AB,DE OR NSAID\*:TI,AB,DE OR  
'NON-STEROIDAL ANTI-INFLAMMATORY AGENT':TI,AB,DE OR 'NON STEROIDAL  
ANTI INFLAMMATORY AGENT':TI,AB,DE OR 'ASPIRIN-LIKE AGENT':TI,AB,DE OR  
'ANTI-INFLAMMATORY ANALGESIC':TI,AB,DE OR 'NON-STEROIDAL ANTI-  
RHEUMATIC AGENT':TI,AB,DE OR 'NON-STEROIDAL ANTIRHEUMATIC  
AGENT':TI,AB,DE) OR CAPSAICIN:TI,AB,DE OR CAPSAICINE:TI,AB,DE OR  
AXSAIN:TI,AB,DE OR ZOSTRIX:TI,AB,DE OR CAPZASIN:TI,AB,DE OR 'NGX-  
4010':TI,AB,DE OR 'NGX 4010':TI,AB,DE OR CAPSIN:TI,AB,DE OR ADLEA:TI,AB,DE OR  
'ALGRX 4975':TI,AB,DE OR BIOZONE:TI,AB,DE OR 'DECENOIC ACID':TI,AB,DE OR  
QUTENZA:TI,AB,DE OR 'RADIOFREQUENCY ABLATION':TI,AB,DE OR 'CATHETER  
ABLATION':TI,AB,DE OR 'TRANSVENOUS ELECTRIC ABLATION':TI,AB,DE OR  
'TRANSVENOUS ELECTRICAL ABLATION':TI,AB,DE OR BRACE:TI,AB,DE OR  
BRACES:TI,AB,DE OR BRACING:TI,AB,DE OR BRACED:TI,AB,DE OR  
((SHOES:TI,AB,DE OR 'MODIFIED SHOE':TI,AB,DE OR 'WEDGE SHOE':TI,AB,DE OR  
APOS:TI,AB,DE OR APOSTHERAPY:TI,AB,DE OR 'FOOT ORTHOSES':TI,AB,DE OR  
'FOOT ORTHOSIS':TI,AB,DE OR 'FOOT ORTHOTIC':TI,AB,DE OR 'FOOT ARCH  
SUPPORT':TI,AB,DE OR 'SHOE INSERT':TI,AB,DE OR ORTHOTIC\*:TI,AB,DE OR  
'WEDGE INSOLE':TI,AB,DE OR LWI:TI,AB,DE OR LWIS:TI,AB,DE OR  
RETRAINING:TI,AB,DE OR TRAINING:TI,AB,DE) AND GAIT:TI,AB,DE))) OR  
((OSTEOARTH\*:TI,AB,DE OR 'DEGENERATIVE ARTHRITIDES':TI,AB,DE OR  
'DEGENERATIVE ARTHRITIS':TI,AB,DE OR 'NONINFLAMMATORY  
ARTHRITIS':TI,AB,DE OR 'NON-INFLAMMATORY ARTHRITIS':TI,AB,DE OR  
ARTHROSIS:TI,AB,DE OR 'DEGENERATIVE JOINT DISEASE':TI,AB,DE OR 'OSTEO-  
ARTHRITIS':TI,AB,DE OR 'OSTEO-ARTHROSIS':TI,AB,DE OR 'RHEUMATOID  
ARTHROSIS':TI,AB,DE) AND ('FEMORAL PATELLAR':TI,AB,DE OR 'FEMUR  
PATELLAR':TI,AB,DE OR PATELLOFEMORAL:TI,AB,DE OR 'PATELLO-  
FEMORAL':TI,AB,DE OR FEMOROPATELLAR:TI,AB,DE OR 'FEMORO-  
PATELLAR':TI,AB,DE) AND [ENGLISH]/LIM AND [EMBASE]/LIM NOT ([EMBASE]/LIM  
AND [MEDLINE]/LIM) AND ('ARTICLE'/IT OR 'ARTICLE IN PRESS'/IT OR 'REVIEW'/IT)  
NOT ('ANIMAL'/EXP NOT ('ANIMAL'/EXP AND 'HUMAN'/EXP)) NOT ('JUVENILE'/EXP  
NOT ('JUVENILE'/EXP AND 'ADULT'/EXP)) NOT ('EDITORIAL'/EXP OR 'LETTER'/EXP  
OR 'CASE REPORT'/EXP) AND (BRACE:TI,AB,DE OR BRACES:TI,AB,DE OR  
BRACING:TI,AB,DE OR BRACED:TI,AB,DE OR BANDAGE\*:TI,AB,DE OR  
TAPE:TI,AB,DE OR TAPES:TI,AB,DE OR TAPING:TI,AB,DE)) OR ((HIP:TI,AB,DE OR  
HIPS:TI,AB,DE OR COXA:TI,AB,DE OR COXAS:TI,AB,DE OR KNEE\*:TI,AB,DE) AND  
(OSTEOARTHIT\*:TI,AB,DE OR 'DEGENERATIVE ARTHRITIDES':TI,AB,DE OR  
'DEGENERATIVE ARTHRITIS':TI,AB,DE OR 'NONINFLAMMATORY  
ARTHRITIS':TI,AB,DE OR 'NON-INFLAMMATORY ARTHRITIS':TI,AB,DE OR

ARTHRITIS:TI,AB,DE OR 'DEGENERATIVE JOINT DISEASE':TI,AB,DE OR 'OSTEO-  
ARTHRITIS':TI,AB,DE OR 'OSTEO-ARTHRITIS':TI,AB,DE OR  
OSTEOARTHROSIS:TI,AB,DE OR 'RHEUMATOID ARTHROSIS':TI,AB,DE OR  
COXARTHRO\*:TI,AB,DE) AND ('ANIMAL'/EXP NOT ('ANIMAL'/EXP AND 'HUMAN'/EXP)  
OR ((HIP:TI,AB,DE OR HIPS:TI,AB,DE OR COXA:TI,AB,DE OR COXAS:TI,AB,DE OR  
KNEE\*:TI,AB,DE) AND (OSTEOARTHRO\*:TI,AB,DE OR 'DEGENERATIVE  
ARTHRITIDES':TI,AB,DE OR 'DEGENERATIVE ARTHRITIS':TI,AB,DE OR  
'NONINFLAMMATORY ARTHRITIS':TI,AB,DE OR 'NON-INFLAMMATORY  
ARTHRITIS':TI,AB,DE OR ARTHROSIS:TI,AB,DE OR 'DEGENERATIVE JOINT  
DISEASE':TI,AB,DE OR 'OSTEO-ARTHRITIS':TI,AB,DE OR 'OSTEO-  
ARTHRITIS':TI,AB,DE OR OSTEOARTHROSIS:TI,AB,DE OR 'RHEUMATOID  
ARTHRITIS':TI,AB,DE OR COXARTHRO\*:TI,AB,DE) NOT ('ANIMAL'/EXP NOT  
( 'ANIMAL'/EXP AND 'HUMAN'/EXP))) OR ((HIP:TI,AB,DE OR HIPS:TI,AB,DE OR  
COXA:TI,AB,DE OR COXAS:TI,AB,DE OR KNEE\*:TI,AB,DE) AND  
(OSTEOARTHRO\*:TI,AB,DE OR 'DEGENERATIVE ARTHRITIDES':TI,AB,DE OR  
'DEGENERATIVE ARTHRITIS':TI,AB,DE OR 'NONINFLAMMATORY  
ARTHRITIS':TI,AB,DE OR 'NON-INFLAMMATORY ARTHRITIS':TI,AB,DE OR  
ARTHROSIS:TI,AB,DE OR 'DEGENERATIVE JOINT DISEASE':TI,AB,DE OR 'OSTEO-  
ARTHRITIS':TI,AB,DE OR 'OSTEO-ARTHRITIS':TI,AB,DE OR  
OSTEOARTHROSIS:TI,AB,DE OR 'RHEUMATOID ARTHROSIS':TI,AB,DE OR  
COXARTHRO\*:TI,AB,DE) NOT ('ANIMAL'/EXP NOT ('ANIMAL'/EXP AND 'HUMAN'/EXP))  
AND [ENGLISH]/LIM) OR ('JUVENILE'/EXP NOT ('JUVENILE'/EXP AND 'ADULT'/EXP))  
OR ((HIP:TI,AB,DE OR HIPS:TI,AB,DE OR COXA:TI,AB,DE OR COXAS:TI,AB,DE OR  
KNEE\*:TI,AB,DE) AND (OSTEOARTHRO\*:TI,AB,DE OR 'DEGENERATIVE  
ARTHRITIDES':TI,AB,DE OR 'DEGENERATIVE ARTHRITIS':TI,AB,DE OR  
'NONINFLAMMATORY ARTHRITIS':TI,AB,DE OR 'NON-INFLAMMATORY  
ARTHRITIS':TI,AB,DE OR ARTHROSIS:TI,AB,DE OR 'DEGENERATIVE JOINT  
DISEASE':TI,AB,DE OR 'OSTEO-ARTHRITIS':TI,AB,DE OR 'OSTEO-  
ARTHRITIS':TI,AB,DE OR OSTEOARTHROSIS:TI,AB,DE OR 'RHEUMATOID  
ARTHRITIS':TI,AB,DE OR COXARTHRO\*:TI,AB,DE) NOT ('ANIMAL'/EXP NOT  
( 'ANIMAL'/EXP AND 'HUMAN'/EXP)) AND [ENGLISH]/LIM NOT ('JUVENILE'/EXP NOT  
( 'JUVENILE'/EXP AND 'ADULT'/EXP))) OR 'EDITORIAL'/EXP OR 'LETTER'/EXP OR  
'CASE REPORT'/EXP OR ((HIP:TI,AB,DE OR HIPS:TI,AB,DE OR COXA:TI,AB,DE OR  
COXAS:TI,AB,DE OR KNEE\*:TI,AB,DE) AND (OSTEOARTHRO\*:TI,AB,DE OR  
'DEGENERATIVE ARTHRITIDES':TI,AB,DE OR 'DEGENERATIVE ARTHRITIS':TI,AB,DE  
OR 'NONINFLAMMATORY ARTHRITIS':TI,AB,DE OR 'NON-INFLAMMATORY  
ARTHRITIS':TI,AB,DE OR ARTHROSIS:TI,AB,DE OR 'DEGENERATIVE JOINT  
DISEASE':TI,AB,DE OR 'OSTEO-ARTHRITIS':TI,AB,DE OR 'OSTEO-  
ARTHRITIS':TI,AB,DE OR OSTEOARTHROSIS:TI,AB,DE OR 'RHEUMATOID  
ARTHRITIS':TI,AB,DE OR COXARTHRO\*:TI,AB,DE) NOT ('ANIMAL'/EXP NOT  
( 'ANIMAL'/EXP AND 'HUMAN'/EXP)) AND [ENGLISH]/LIM NOT ('JUVENILE'/EXP NOT  
( 'JUVENILE'/EXP AND 'ADULT'/EXP)) NOT ('EDITORIAL'/EXP OR 'LETTER'/EXP OR  
'CASE REPORT'/EXP)) OR ((( 'CYCLOOXYGENASE INHIBITOR':TI,AB,DE OR  
'CYCLOOXYGENASE 2 INHIBITOR':TI,AB,DE OR 'NONSTEROIDAL

ANTIINFLAMMATORY AGENT':TI,AB,DE OR 'NONSTEROIDAL ANTI INFLAMMATORY AGENT':TI,AB,DE OR 'NON-STEROIDAL ANTI-INFLAMMATORY AGENT':TI,AB,DE OR 'NON STEROIDAL ANTI INFLAMMATORY AGENT':TI,AB,DE OR 'ASPIRIN-LIKE AGENT':TI,AB,DE OR 'ANTI-INFLAMMATORY ANALGESIC':TI,AB,DE OR 'NON-STEROIDAL ANTI-RHEUMATIC AGENT':TI,AB,DE OR 'NON-STEROIDAL ANTIRHEUMATIC AGENT':TI,AB,DE OR NSAID\*':TI,AB,DE OR 'A 771726':TI,AB,DE OR ACECLOFENAC:TI,AB,DE OR ACEMETACIN:TI,AB,DE OR ACETOSYRINGONE:TI,AB,DE OR ACETOVANILLONE:TI,AB,DE OR 'ACETYLSALICYLIC ACID LYSINATE':TI,AB,DE OR ADAPALENE:TI,AB,DE OR ALCLOFENAC:TI,AB,DE OR ALMINOPROFEN:TI,AB,DE OR AMIPRILOSE:TI,AB,DE OR AMPYRONE:TI,AB,DE OR ANDROGRAPHOLIDE:TI,AB,DE OR ANISODAMINE:TI,AB,DE OR ANISODINE:TI,AB,DE OR 'ANTIFLAMMIN P2':TI,AB,DE OR ANTIPYRINE:TI,AB,DE OR APAZONE:TI,AB,DE OR APREMILAST:TI,AB,DE OR ARTEPARON:TI,AB,DE OR ARTHROTEC:TI,AB,DE OR ASPIRIN:TI,AB,DE OR ATRINOSITOL:TI,AB,DE OR AZULENE:TI,AB,DE OR BAICALIN:TI,AB,DE OR BALSALAZIDE:TI,AB,DE OR BENDAZAC:TI,AB,DE OR BENORILATE:TI,AB,DE OR BENOXAPROFEN:TI,AB,DE OR BENZOBARBITAL:TI,AB,DE OR BERBAMINE:TI,AB,DE OR BETULINIC) AND ACID:TI,AB,DE OR BEVONIUM:TI,AB,DE OR BIPHENYLLACETIC) AND ACID:TI,AB,DE) OR BOLDINE:TI,AB,DE OR BREDININ:TI,AB,DE OR BROMFENAC:TI,AB,DE OR BUCILLAMINE:TI,AB,DE OR BUFEXAMAC:TI,AB,DE OR BUMADIZONE:TI,AB,DE OR BUTIBUFEN:TI,AB,DE OR 'CARBASPIRIN CALCIUM':TI,AB,DE OR 'CARBON FIBER':TI,AB,DE OR CARPROFEN:TI,AB,DE OR CARYOPHYLLENE:TI,AB,DE OR CASTANOSPERMINE:TI,AB,DE OR 'CDP 571':TI,AB,DE OR CELECOXIB:TI,AB,DE OR CEPHARANTHINE:TI,AB,DE OR 'CHLOROQUINE DIPHOSPHATE':TI,AB,DE OR 'CHOLINE MAGNESIUM TRISALICYLATE':TI,AB,DE OR CHRYSAROBIN:TI,AB,DE OR CLONIXIN:TI,AB,DE OR 'CP 96345':TI,AB,DE OR CURCUMIN:TI,AB,DE OR DAURICINE:TI,AB,DE OR 'DESKETOPROFEN TROMETAMOL':TI,AB,DE OR DICLOFENAC:TI,AB,DE OR DIFENPIRAMIDE:TI,AB,DE OR DIFLUNISAL:TI,AB,DE OR DIMEPHOSPHON:TI,AB,DE OR DIPYRONE:TI,AB,DE OR DIUCIFON:TI,AB,DE OR DROXICAM:TI,AB,DE OR 'DUP 697':TI,AB,DE OR EBSELEN:TI,AB,DE OR EFAMOL:TI,AB,DE OR ELTENAC:TI,AB,DE OR 'ENFENAMIC ACID':TI,AB,DE OR EPIRIZOLE:TI,AB,DE OR ETANERCEPT:TI,AB,DE OR ETHENZAMIDE:TI,AB,DE OR ETHONIUM:TI,AB,DE OR ETODOLAC:TI,AB,DE OR ETOFENAMATE:TI,AB,DE OR ETORICOXIB:TI,AB,DE OR 'FENAMIC ACID':TI,AB,DE OR FENBUFEN:TI,AB,DE OR FENCLOFENAC:TI,AB,DE OR FENFLUMIZOLE:TI,AB,DE OR FENOPROFEN:TI,AB,DE OR FENTIAZAC:TI,AB,DE OR FEPRADINOL:TI,AB,DE OR FEPRAZONE:TI,AB,DE OR 'FERULIC ACID':TI,AB,DE OR FLOCTAFENINE:TI,AB,DE OR FLOSULIDE:TI,AB,DE OR FLUNIXIN:TI,AB,DE OR FLUNOXAPROFEN:TI,AB,DE OR FLUPROQUAZONE:TI,AB,DE OR FLURBIPROFEN:TI,AB,DE OR 'FR 167653':TI,AB,DE OR 'FR 173657':TI,AB,DE OR GLUCAMETACIN:TI,AB,DE OR GUACETISAL:TI,AB,DE OR HELENALIN:TI,AB,DE OR HELIODERMIN:TI,AB,DE OR HEMODES:TI,AB,DE OR HIGENAMINE:TI,AB,DE OR IBUPROFEN:TI,AB,DE OR IBUPROXAM:TI,AB,DE OR ICATIBANT:TI,AB,DE OR 'IH 764-3':TI,AB,DE OR 'IMIDAZOLE-2-HYDROXYBENZOATE':TI,AB,DE OR

INDOBUFEN:TI,AB,DE OR INDOMETHACIN:TI,AB,DE OR INDOPROFEN:TI,AB,DE OR IODOANTIPYRINE:TI,AB,DE OR ISOXICAM:TI,AB,DE OR KEBUZONE:TI,AB,DE OR KETOPROFEN:TI,AB,DE OR KETOROLAC:TI,AB,DE OR 'L 745337':TI,AB,DE OR 'L 778736':TI,AB,DE OR 'LIPOXIN A4':TI,AB,DE OR 'LIPOXIN B4':TI,AB,DE OR LISOFYLLINE:TI,AB,DE OR LOBENZARIT:TI,AB,DE OR LONAZOLAC:TI,AB,DE OR LORNOXICAM:TI,AB,DE OR LOXOPROFEN:TI,AB,DE OR LUMIRACOXIB:TI,AB,DE OR 'MAGNESIUM SALICYLATE':TI,AB,DE OR MAGNOLOL:TI,AB,DE OR MANOALIDE:TI,AB,DE OR MASOPROCOL:TI,AB,DE OR 'MECLOFENAMIC ACID':TI,AB,DE OR 'MEFENAMIC ACID':TI,AB,DE OR MELOXICAM:TI,AB,DE OR MESALAMINE:TI,AB,DE OR MOFEBUTAZONE:TI,AB,DE OR MOFEZOLAC:TI,AB,DE OR NABUMETONE:TI,AB,DE OR NAFAMOSTAT:TI,AB,DE OR NAPROXEN:TI,AB,DE OR NEBACETIN:TI,AB,DE OR NEPAFENAC:TI,AB,DE OR NIFENAZONE:TI,AB,DE OR 'NIFLUMIC ACID':TI,AB,DE OR NIMESULIDE:TI,AB,DE OR NITROASPIRIN:TI,AB,DE OR 'OLOPATADINE HYDROCHLORIDE':TI,AB,DE OR OLSALAZINE:TI,AB,DE OR OLVANIL:TI,AB,DE OR 'OREN GEDOKU TO':TI,AB,DE OR ORGOTEIN:TI,AB,DE OR OXAPROZIN:TI,AB,DE OR OXYPHENBUTAZONE:TI,AB,DE OR PALMIDROL:TI,AB,DE OR PARECOXIB:TI,AB,DE OR PARTHENOLIDE:TI,AB,DE OR PEONIFLORIN:TI,AB,DE OR PHENIDONE:TI,AB,DE OR PHENYLBUTAZONE:TI,AB,DE OR PIMECROLIMUS:TI,AB,DE OR PIRFENIDONE:TI,AB,DE OR PIROXICAM\*:TI,AB,DE OR PIRPROFEN:TI,AB,DE OR PROGLUMETACIN:TI,AB,DE OR PROPACETAMOL:TI,AB,DE OR PROPIONYLCARNITINE:TI,AB,DE OR PROPYPHENAZONE:TI,AB,DE OR PROQUAZONE:TI,AB,DE OR PYRANOPROFEN:TI,AB,DE OR PYRAZOLONE:TI,AB,DE OR PYROGENAL:TI,AB,DE OR RESVERATROL:TI,AB,DE OR ROFECOXIB:TI,AB,DE OR 'ROSMARINIC ACID':TI,AB,DE OR RUMALON:TI,AB,DE OR 'SAIKO-KEISHI-TO':TI,AB,DE OR SAIKOSAPONIN:TI,AB,DE OR SALICIN:TI,AB,DE OR SALICYLAMIDE:TI,AB,DE OR SALICYLATES:TI,AB,DE OR 'SALICYLSALICYLIC ACID':TI,AB,DE OR 'SB 203580':TI,AB,DE OR 'SC 299':TI,AB,DE OR 'SC 41930':TI,AB,DE OR 'SC 560':TI,AB,DE OR SEMAPIMOD:TI,AB,DE OR SERATRODAST:TI,AB,DE OR SERRATIOPEPTIDASE:TI,AB,DE OR SHIKONIN:TI,AB,DE OR SINAPALDEHYDE:TI,AB,DE OR 'SODIUM SALICYLATE':TI,AB,DE OR 'ST 679':TI,AB,DE OR SULFASALAZINE:TI,AB,DE OR SULINDAC:TI,AB,DE OR SUPROFEN:TI,AB,DE OR SUXIBUZONE:TI,AB,DE OR TANSHINONE:TI,AB,DE OR TAXIFOLIN:TI,AB,DE OR TENIDAP:TI,AB,DE OR TENOXICAM:TI,AB,DE OR TEPOXALIN:TI,AB,DE OR 'TIAPROFENIC ACID':TI,AB,DE OR TIARAMIDE:TI,AB,DE OR TINORIDINE:TI,AB,DE OR 'TOLFENAMIC ACID':TI,AB,DE OR TOLMETIN:TI,AB,DE OR TRANILAST:TI,AB,DE OR TRIBENOSIDE:TI,AB,DE OR 'URSOLIC ACID':TI,AB,DE OR VALDECOXIB:TI,AB,DE OR ZILEUTON:TI,AB,DE OR ZOMEPIRAC:TI,AB,DE OR HYDROXYACETANILIDE:TI,AB,DE OR APAP:TI,AB,DE OR 'P-ACETAMIDOPHENOL':TI,AB,DE OR 'P-HYDROXYACETANILIDE':TI,AB,DE OR PARACETAMOL:TI,AB,DE OR ACETAMIDOPHENOL:TI,AB,DE OR ACEPHEN:TI,AB,DE OR TYLENOL:TI,AB,DE OR ANACIN\*:TI,AB,DE OR PANADOL:TI,AB,DE OR ACAMOL:TI,AB,DE OR ACETAMINOPHEN:TI,AB,DE OR GLUCOSAMIDE:TI,AB,DE OR 'D GLUCOSE AMINE':TI,AB,DE OR 'GLUCOSE AMINE':TI,AB,DE OR 'NSC 758':TI,AB,DE OR

DONA:TI,AB,DE OR 'DONA S':TI,AB,DE OR GLUCOSAMINE\*:TI,AB,DE OR '2-AMINO-2-DEOXYGLUCOSE':TI,AB,DE OR '2 AMINO 2 DEOXYGLUCOSE':TI,AB,DE OR CHONDROITIN\*:TI,AB,DE OR ALFENTANIL:TI,AB,DE OR ALPHAPRODINE:TI,AB,DE OR 'BETA-CASOMORPHINS':TI,AB,DE OR BUPRENORPHINE:TI,AB,DE OR BUTORPHANOL:TI,AB,DE OR CARFENTANIL:TI,AB,DE OR CODEINE:TI,AB,DE OR DERMORPHIN:TI,AB,DE OR DEXTROMORAMIDE:TI,AB,DE OR DEXTROPROPOXYPHENE:TI,AB,DE OR DEZOCINE:TI,AB,DE OR DIHYDROCODEINE:TI,AB,DE OR DIHYDROMORPHINE:TI,AB,DE OR DIPHENOXYLATE:TI,AB,DE OR 'ENDOMORPHIN 1':TI,AB,DE OR 'ENDOMORPHIN 2':TI,AB,DE OR ESEROLINE:TI,AB,DE OR ETHYLKETOCYCLAZOCINE:TI,AB,DE OR ETHYLMORPHINE:TI,AB,DE OR ETORPHINE:TI,AB,DE OR FENTANYL:TI,AB,DE OR HEROIN:TI,AB,DE OR HYDROCODONE:TI,AB,DE OR HYDROMORPHONE:TI,AB,DE OR KETOBEMIDONE:TI,AB,DE OR LEVORPHANOL:TI,AB,DE OR LOFENTANIL:TI,AB,DE OR MEPERIDINE:TI,AB,DE OR MEPTAZINOL:TI,AB,DE OR METHADONE:TI,AB,DE OR 'METHADYL ACETATE':TI,AB,DE OR MORPHINE:TI,AB,DE OR NALBUPHINE:TI,AB,DE OR NOCISTATIN:TI,AB,DE OR NORMETHADONE:TI,AB,DE OR 'OPIATE ALKALOIDS':TI,AB,DE OR OXYCODONE:TI,AB,DE OR OXYMORPHONE:TI,AB,DE OR PARACY METHADOL:TI,AB,DE OR PENTAZOCINE:TI,AB,DE OR PHENAZOCINE:TI,AB,DE OR PHENOPERIDINE:TI,AB,DE OR PIRINITRAMIDE:TI,AB,DE OR PROMEDOL:TI,AB,DE OR PROTOPINE:TI,AB,DE OR REMIFENTANIL:TI,AB,DE OR SUFENTANIL:TI,AB,DE OR TILIDINE:TI,AB,DE OR OXYCONTIN:TI,AB,DE OR ALGOPAN:TI,AB,DE OR BIOPON:TI,AB,DE OR LAUDANUM:TI,AB,DE OR NEPENTHE:TI,AB,DE OR OMNOPON:TI,AB,DE OR OPIAL:TI,AB,DE OR OPIUM:TI,AB,DE OR OPON:TI,AB,DE OR PANTOPON:TI,AB,DE OR PAPAVERETUM:TI,AB,DE OR PAVON:TI,AB,DE OR TETRAPON:TI,AB,DE OR OPIOD\*:TI,AB,DE OR OPIATE\*:TI,AB,DE OR TRAMADOL\*:TI,AB,DE OR TRAMUNDIN:TI,AB,DE OR DALGIC OR 'K-315':TI,AB,DE OR 'K 315':TI,AB,DE OR K315:TI,AB,DE OR NOBLIGAN:TI,AB,DE OR ZYTRAM:TI,AB,DE OR TIRAL:TI,AB,DE OR TOPALGIC:TI,AB,DE OR 'TRAMA ABZ':TI,AB,DE OR 'TRAMA KD':TI,AB,DE OR 'TRAMA DORSCH':TI,AB,DE OR 'RANITIDIN 1A PHARMA':TI,AB,DE OR 'TRAMA 1A PHARMA':TI,AB,DE OR ULTRAM:TI,AB,DE OR ZYDOL:TI,AB,DE OR TRAMADOLOR:TI,AB,DE OR TRAMAL:TI,AB,DE OR ADOLONTA:TI,AB,DE OR CONTRAMAL:TI,AB,DE OR DULOXETINE\*:TI,AB,DE OR 'LY 248686':TI,AB,DE OR 'LY-248686':TI,AB,DE OR CYMBALTA\*:TI,AB,DE OR 'NERVE GROWTH FACTOR ANTISERUM':TI,AB,DE OR 'NGF ANTISERUM':TI,AB,DE OR 'ANTISERUM NGF':TI,AB,DE OR 'ANTI-NERVE GROWTH FACTOR':TI,AB,DE OR TANEZUMAB:TI,AB,DE OR 'NERVE GROWTH FACTOR ANTIBODY':TI,AB,DE OR 'NERVE GROWTH FACTOR ANTIBODIES':TI,AB,DE OR 'NERVE GROWTH FACTOR ANTAGONIST':TI,AB,DE OR 'NERVE GROWTH FACTOR ANTAGONISTS':TI,AB,DE OR 'NERVE GROWTH FACTOR INHIBITOR':TI,AB,DE OR 'NERVE GROWTH FACTOR INHIBITORS':TI,AB,DE OR 'ANTI-NGF':TI,AB,DE OR FULRANUMAB:TI,AB,DE OR 'NERVE GROWTH FACTOR BLOCKER':TI,AB,DE OR 'NGF INHIBITOR':TI,AB,DE OR 'NGF ANTAGONIST':TI,AB,DE OR 'NGF BLOCKER':TI,AB,DE OR 'NGF-AB':TI,AB,DE OR

FASINUMAB:TI,AB,DE OR ((HYDROGEL\*:TI,AB,DE OR TAPE:TI,AB,DE OR TAPES:TI,AB,DE OR PATCH\*:TI,AB,DE OR PERCUTANEOUS\*:TI,AB,DE OR OINTMENT\*:TI,AB,DE OR TRANSDERMAL\*:TI,AB,DE OR CUTANEOUS\*:TI,AB,DE OR 'DERMAL ADMINISTRATION':TI,AB,DE OR INTRAEPIDERMAL\*:TI,AB,DE OR PASTE\*:TI,AB,DE OR GEL:TI,AB,DE OR GELS:TI,AB,DE OR TOPICAL\*:TI,AB,DE OR TRANSCUTANEOUS\*:TI,AB,DE) AND ('NONSTEROIDAL ANTIINFLAMMATORY AGENT':TI,AB,DE OR 'NONSTEROIDAL ANTI-INFLAMMATORY AGENT':TI,AB,DE OR 'NONSTEROIDAL ANTI INFLAMMATORY AGENT':TI,AB,DE OR NSAID\*:TI,AB,DE OR 'NON-STEROIDAL ANTI-INFLAMMATORY AGENT':TI,AB,DE OR 'NON STEROIDAL ANTI INFLAMMATORY AGENT':TI,AB,DE OR 'ASPIRIN-LIKE AGENT':TI,AB,DE OR 'ANTI-INFLAMMATORY ANALGESIC':TI,AB,DE OR 'NON-STEROIDAL ANTI-RHEUMATIC AGENT':TI,AB,DE OR 'NON-STEROIDAL ANTIRHEUMATIC AGENT':TI,AB,DE)) OR CAPSAICIN:TI,AB,DE OR CAPSAICINE:TI,AB,DE OR AXSAIN:TI,AB,DE OR ZOSTRIX:TI,AB,DE OR CAPZASIN:TI,AB,DE OR 'NGX-4010':TI,AB,DE OR 'NGX 4010':TI,AB,DE OR CAPSIN:TI,AB,DE OR ADLEA:TI,AB,DE OR 'ALGRX 4975':TI,AB,DE OR BIOZONE:TI,AB,DE OR 'DECENOIC ACID':TI,AB,DE OR QUTENZA:TI,AB,DE OR 'GAMMA-AMINOBUTYRIC ACID':TI,AB,DE OR GABA:TI,AB,DE OR AMINALON\*:TI,AB,DE OR GAMMALON:TI,AB,DE OR HORIZANT:TI,AB,DE OR GABAPENTIN:TI,AB,DE OR CONVALIS:TI,AB,DE OR NEURONTIN:TI,AB,DE OR 'HEAT TREATMENT':TI,AB,DE OR 'THERMAL THERAPY':TI,AB,DE OR DIATHERM\*:TI,AB,DE OR 'HYPERTHERMIC THERAPY':TI,AB,DE OR 'HEAT THERAPY':TI,AB,DE OR 'THERAPEUTIC HEAT':TI,AB,DE OR 'HEAT APPLICATION':TI,AB,DE OR 'INDUCED HYPERTHERMIA':TI,AB,DE OR THERMOTHERAP\*:TI,AB,DE OR 'LOCAL HEAT':TI,AB,DE OR 'HOT PACK':TI,AB,DE OR 'HEATING PAD':TI,AB,DE OR DIATHERAP\*:TI,AB,DE OR DIATHERMIA:TI,AB,DE OR INDUCTOTHERMY:TI,AB,DE OR 'COLD BATH':TI,AB,DE OR 'CRYOGENIC THERAPY':TI,AB,DE OR CRYOTHERM\*:TI,AB,DE OR 'CRYO-TREATMENT':TI,AB,DE OR CRYOTREATMENT\*:TI,AB,DE OR 'COOLING THERAPY':TI,AB,DE OR 'COLD TREATMENT':TI,AB,DE OR 'THERAPEUTIC COOLING':TI,AB,DE OR CRYOTHERAP\*:TI,AB,DE OR 'COLD THERAPY':TI,AB,DE OR HYPOTHERM\*:TI,AB,DE OR 'ICE THERAPY':TI,AB,DE OR 'ICE PACK':TI,AB,DE OR 'MUSCLE STRENGTH':TI,AB,DE OR 'RESISTANCE TRAINING':TI,AB,DE OR 'STRENGTH TRAINING':TI,AB,DE OR STRENGTHEN\*:TI,AB,DE OR AEROBIC\*:TI,AB,DE OR (('NEUROMUSCULAR REEDUCATION':TI,AB,DE OR 'NEURO-MUSCULAR REEDUCATION':TI,AB,DE OR 'NEUROMUSCULAR RE-EDUCATION':TI,AB,DE OR 'NEURO-MUSCULAR RE-EDUCATION':TI,AB,DE OR NEMEX\*:TI,AB,DE OR NEUROMUSCULAR:TI,AB,DE OR 'NEURO-MUSCULAR':TI,AB,DE) AND (TRAINING\*:TI,AB,DE OR EXERCIS\*:TI,AB,DE)) OR AQUATICS:TI,AB,DE OR 'AQUATIC EXERCISE':TI,AB,DE OR 'AQUATIC ACTIVITY':TI,AB,DE OR HYDROTHERAP\*:TI,AB,DE OR 'WHIRLPOOL BATH':TI,AB,DE OR 'KNEIPP THERAPY':TI,AB,DE OR 'WATER IMMERSION THERAPY':TI,AB,DE OR 'BALANCE TRAINING':TI,AB,DE OR 'BALANCE EXERCISE':TI,AB,DE OR 'BALANCE RE-EDUCATION':TI,AB,DE OR 'BALANCE REEDUCATION':TI,AB,DE OR 'CIRCUIT-BASED EXERCISE':TI,AB,DE OR 'CIRCUIT TRAINING':TI,AB,DE OR ((AMBULAT\*:TI,AB,DE OR

WALKING:TI,AB,DE) AND DAILY:TI,AB,DE) OR EXERCISE\*:TI,AB,DE OR 'EXERCISE THERAPY':TI,AB,DE OR ('PSYCHOLOGICAL ADAPTATION':TI,AB,DE AND 'COPING BEHAVIOR':TI,AB,DE) OR 'COPING BEHAVIOUR':TI,AB,DE OR 'COPING SKILL':TI,AB,DE OR 'ADAPTIVE BEHAVIOR':TI,AB,DE OR 'PATIENT COMPLIANCE':TI,AB,DE OR 'PATIENT ADHERENCE':TI,AB,DE OR 'PATIENT COOPERATION':TI,AB,DE OR 'PATIENT EDUCATION':TI,AB,DE OR 'EDUCATION OF PATIENTS':TI,AB,DE OR 'SELF-HELP':TI,AB,DE OR 'SELF HELP':TI,AB,DE OR 'SELF TREATMENT':TI,AB,DE OR 'SELF-TREATMENT':TI,AB,DE OR 'SELF EFFICACY':TI,AB,DE OR 'SELF-EFFICACY':TI,AB,DE OR 'SELF CARE':TI,AB,DE OR 'SELF MANAGEMENT':TI,AB,DE OR 'SELF-CARE':TI,AB,DE OR 'SELF-MANAGEMENT':TI,AB,DE OR 'PATIENT PARTICIPATION':TI,AB,DE OR 'PATIENT INVOLVEMENT':TI,AB,DE OR 'PATIENT EMPOWERMENT':TI,AB,DE OR 'PATIENT ACTIVATION':TI,AB,DE OR 'PATIENT ENGAGEMENT':TI,AB,DE OR 'MINDFULNESS':TI,AB,DE OR 'CBT-I':TI,AB,DE OR 'COGNITIVE BEHAVIOR':TI,AB,DE OR 'COGNITIVE BEHAVIOUR':TI,AB,DE OR 'COGNITIVE THERAPY':TI,AB,DE OR CBT:TI,AB,DE OR 'COGNITION THERAPY':TI,AB,DE OR 'COGNITIVE PSYCHOTHERAPY':TI,AB,DE OR 'WEIGHT DECREASE':TI,AB,DE OR 'WEIGHT LOSING':TI,AB,DE OR 'WEIGHT REDUCING':TI,AB,DE OR 'WEIGHT WATCHING':TI,AB,DE OR 'WEIGHT LOSS':TI,AB,DE OR 'WEIGHT REDUCTION':TI,AB,DE OR ACUPUNCTURE\*:TI,AB,DE OR PHARMACOPUNCTURE\*:TI,AB,DE OR (('YOGA':TI,AB,DE OR 'THERAPEUTIC TOUCH':TI,AB,DE OR REIKI:TI,AB,DE OR 'LAYING-ON-OF-HANDS':TI,AB,DE OR 'TAI JI':TI,AB,DE OR 'TAI-JI':TI,AB,DE OR 'TAI CHI':TI,AB,DE OR 'TAI JI QUAN':TI,AB,DE OR TAIJI:TI,AB,DE OR TAIJQUAN:TI,AB,DE OR 'RELAXATION THERAPY':TI,AB,DE OR 'RELAXATION TECHNIQUE':TI,AB,DE OR 'RELAXATION TECHNICS':TI,AB,DE OR 'PSYCHOPHYSIOLOGY':TI,AB,DE OR 'PHYSIOLOGICAL PSYCHOLOGY':TI,AB,DE OR 'PHYSIOLOGIC PSYCHOLOGY':TI,AB,DE OR PSYCHODRAMA\*:TI,AB,DE OR 'DRAMA THERAPY':TI,AB,DE OR DRAMATHERAP\*:TI,AB,DE OR 'ROLE PLAYING':TI,AB,DE OR 'MENTAL HEALING':TI,AB,DE OR MEDITATION\*:TI,AB,DE OR 'LAUGHTER THERAPY':TI,AB,DE OR 'IMAGERY PSYCHOTHERAPY':TI,AB,DE OR IMAGERY:TI,AB,DE OR 'DIRECTED REVERIE THERAPY':TI,AB,DE OR IMAGERIES:TI,AB,DE OR 'SUGGESTION':TI,AB,DE OR AUTOSUGGESTION\*:TI,AB,DE OR 'PROGRESSIVE RELAXATION':TI,AB,DE OR 'PROGRESSIVE MUSCLE RELAXATION':TI,AB,DE OR 'AUTOGENIC TRAINING':TI,AB,DE OR HYPNOSI\*:TI,AB,DE OR HYPNOTISM\*:TI,AB,DE OR HYPNOTHERAP\*:TI,AB,DE OR MESMERISM\*:TI,AB,DE OR 'QI GONG':TI,AB,DE) AND 'BREATHING EXERCISES':TI,AB,DE) OR 'BREATHING EXERCISE':TI,AB,DE OR QIGONG\*:TI,AB,DE OR NEUROFEEDBACK\*:TI,AB,DE OR 'ALPHA FEEDBACK':TI,AB,DE OR 'ELECTROMYOGRAPHY FEEDBACK':TI,AB,DE OR 'EEG FEEDBACK':TI,AB,DE OR 'BRAINWAVE FEEDBACK':TI,AB,DE OR AROMATHERAP\*:TI,AB,DE OR BIOFEEDBACK\*:TI,AB,DE OR 'PSYCHOLOGICAL FEEDBACK':TI,AB,DE OR MYOFEEDBACK\*:TI,AB,DE OR 'PHYSIOLOGICAL FEEDBACK':TI,AB,DE OR 'MIND-BODY THERAPIES':TI,AB,DE OR 'MIND-BODY':TI,AB,DE OR 'MIND BODY':TI,AB,DE OR CANE:TI,AB,DE OR CANES:TI,AB,DE OR 'WALKING STICK':TI,AB,DE OR

'TRANSCUTANEOUS ELECTRIC NERVE STIMULATION':TI,AB,DE OR  
'TRANSCUTANEOUS ELECTRICAL NERVE STIMULATION':TI,AB,DE OR  
ELECTROSTIMULATION\*:TI,AB,DE OR ELECTROANALGESIA:TI,AB,DE OR  
'PERCUTANEOUS ELECTRIC NERVE STIMULATION':TI,AB,DE OR TENS:TI,AB,DE OR  
'TRANSCUTANEOUS ELECTRICAL STIMULATION':TI,AB,DE OR 'TRANSDERMAL  
ELECTROSTIMULATION':TI,AB,DE OR 'PERCUTANEOUS ELECTRICAL NERVE  
STIMULATION':TI,AB,DE OR 'TRANSCUTANEOUS ELECTRIC STIMULATION':TI,AB,DE  
OR 'TRANSCUTANEOUS NERVE STIMULATION':TI,AB,DE OR 'ANALGESIC  
CUTANEOUS ELECTROSTIMULATION':TI,AB,DE OR 'TRANSCUTANEOUS  
ELECTROSTIMULATION':TI,AB,DE OR ((((((('PULSED RADIOFREQUENCY  
TREATMENT':TI,AB,DE OR 'PULSED RADIO FREQUENCY TREATMENT':TI,AB,DE OR  
'ELECTRIC STIMULATION THERAPY':TI,AB,DE OR ELECTROTHERAP\*:TI,AB,DE OR  
ELECTRIC) AND STIMULATION\*:TI,AB,DE OR ELECTRICAL) AND  
STIMULATION\*:TI,AB,DE OR WHOLE) AND BODY AND VIBRATION\*:TI,AB,DE OR  
WBV:TI,AB,DE OR VIBRATION) AND TRAINING:TI,AB,DE OR  
'VIBRATION/THERAPEUTIC USE':TI,AB,DE OR ELECTROPHYSICAL) AND  
THERAP\*:TI,AB,DE OR PULSED) AND VIBRATION AND THERAP\*:TI,AB,DE) OR  
MASSAGE\*:TI,AB,DE OR 'ZONE THERAPY':TI,AB,DE OR REFLEXOLOG\*:TI,AB,DE OR  
ROLFING:TI,AB,DE OR BODYWORK\*:TI,AB,DE OR ((SOFT AND TISSUE AND  
THERAP\*:TI,AB,DE OR CHIROPRACTIC\*:TI,AB,DE OR 'APPLIED  
KINESIOLOGY':TI,AB,DE OR 'MUSCULOSKELETAL MANIPULATIONS':TI,AB,DE OR  
'MUSCULOSKELETAL MANIPULATION':TI,AB,DE OR 'MANUAL THERAPY':TI,AB,DE  
OR 'MANIPULATION THERAPY':TI,AB,DE OR 'MANIPULATIVE THERAPY':TI,AB,DE OR  
OSTEOPATH\*:TI,AB,DE OR ORTHOP\*:TI,AB,DE OR SPINE:TI,AB,DE OR  
SPINAL:TI,AB,DE) AND (MANIPULAT\*:TI,AB,DE OR ACUPRESSURE\*:TI,AB,DE OR  
SHIATSU:TI,AB,DE OR 'ZHI YA':TI,AB,DE OR 'CHIH YA':TI,AB,DE)) OR  
SALINE\*:TI,AB,DE OR 'SODIUM CHLORIDE SOLUTION':TI,AB,DE OR  
'BONT/A':TI,AB,DE OR 'BOTULINIUM TOXIN':TI,AB,DE OR 'BOTULINUM  
NEUROTOXIN':TI,AB,DE OR 'BOTULINUS TOXIN':TI,AB,DE OR 'BOTULISM  
TOXIN':TI,AB,DE OR 'CLOSTRIDIUM BOTULINUM EXOTOXIN':TI,AB,DE OR  
'BOTULINUM TOXINS':TI,AB,DE OR 'BOTULINUM TOXIN':TI,AB,DE OR  
BOTULIN:TI,AB,DE OR HYPERTONIC\*:TI,AB,DE OR 'PROLIFERATIVE  
THERAPY':TI,AB,DE OR PROLOTHERAP\*:TI,AB,DE OR 'MESENCHYMAL STROMAL  
CELLS':TI,AB,DE OR 'MESENCHYMAL STEM CELLS':TI,AB,DE OR 'MESENCHYMAL  
PROGENITOR CELLS':TI,AB,DE OR 'MULTIPOTENT BONE MARROW STROMAL  
CELLS':TI,AB,DE OR 'BONE MARROW STROMAL CELLS':TI,AB,DE OR 'WHARTON  
JELLY CELLS':TI,AB,DE OR 'WHARTONS JELLY CELLS':TI,AB,DE OR MSC:TI,AB,DE  
OR 'THROMBOCYTE RICH PLASMA':TI,AB,DE OR 'THROMBOCYTE-RICH  
PLASMA':TI,AB,DE OR 'PLATELET-RICH PLASMA':TI,AB,DE OR PRP:TI,AB,DE OR  
'PLATELET RICH PLASMA':TI,AB,DE OR (((SALINE\*:TI,AB,DE OR 'SODIUM CHLORIDE  
SOLUTION':TI,AB,DE OR 'BONT/A':TI,AB,DE OR 'BOTULINIUM TOXIN':TI,AB,DE OR  
'BOTULINUM NEUROTOXIN':TI,AB,DE OR 'BOTULINUS TOXIN':TI,AB,DE OR  
'BOTULISM TOXIN':TI,AB,DE OR 'CLOSTRIDIUM BOTULINUM EXOTOXIN':TI,AB,DE  
OR 'BOTULINUM TOXINS':TI,AB,DE OR 'BOTULINUM TOXIN':TI,AB,DE OR



BOTULIN:TI,AB,DE OR HYPERTONIC\*:TI,AB,DE OR 'PROLIFERATIVE THERAPY':TI,AB,DE OR PROLOTHERAP\*:TI,AB,DE OR 'MESENCHYMAL STROMAL CELLS':TI,AB,DE OR 'MESENCHYMAL STEM CELLS':TI,AB,DE OR 'MESENCHYMAL PROGENITOR CELLS':TI,AB,DE OR 'MULTIPOTENT BONE MARROW STROMAL CELLS':TI,AB,DE OR 'BONE MARROW STROMAL CELLS':TI,AB,DE OR 'WHARTON JELLY CELLS':TI,AB,DE OR 'WHARTONS JELLY CELLS':TI,AB,DE OR MSC:TI,AB,DE OR 'THROMBOCYTE RICH PLASMA':TI,AB,DE OR 'THROMBOCYTE-RICH PLASMA':TI,AB,DE OR 'PLATELET-RICH PLASMA':TI,AB,DE OR PRP:TI,AB,DE OR 'PLATELET RICH PLASMA':TI,AB,DE) AND 'TECHNETIUM TC 99M MEDRONATE':TI,AB,DE OR MEDRONATE:TI,AB,DE OR '99MTC-MDP':TI,AB,DE OR 'TECHNETIUM TC 99M METHYLENEDIPHOSPHONATE':TI,AB,DE OR 'TC-99M MDP':TI,AB,DE OR RISEDRONATE\*:TI,AB,DE OR 'RISEDRONIC ACID':TI,AB,DE OR ACTONEL:TI,AB,DE OR ATELVIA:TI,AB,DE OR ETHANEHYDROXYDIPHOSPHONATE:TI,AB,DE OR HEDSPA:TI,AB,DE OR XIDIFON:TI,AB,DE OR 'ETIDRONIC ACID':TI,AB,DE OR ETIDRONATE\*:TI,AB,DE OR EHDP:TI,AB,DE OR XYDIPHON:TI,AB,DE OR XIDIPHON:TI,AB,DE OR DIDRONEL:TI,AB,DE OR 'CLODRONIC ACID':TI,AB,DE OR DICHLOROMETHYLENEBISPHOSPHONATE\*:TI,AB,DE OR DICHLOROMETHANEDIPHOSPHONATE\*:TI,AB,DE OR CLODRONATE:TI,AB,DE OR BONEFOS:TI,AB,DE OR 'ALENDRONATE':TI,AB,DE OR FOSAMAX:TI,AB,DE OR 'MK-217':TI,AB,DE OR 'MK 217':TI,AB,DE OR 'DIPHOSPHONIC ACID DERIVATIVE':TI,AB,DE OR BIPHOSPHONATE\*:TI,AB,DE OR 'BISPHOSPHONIC ACID DERIVATIVE':TI,AB,DE OR 'DIPHOSPHONATES':TI,AB,DE OR DIPHOSPHONATE\*:TI,AB,DE OR BISPHOSPHONATE\*:TI,AB,DE OR FETZIMA:TI,AB,DE OR PRISTIQ:TI,AB,DE OR VENLAFAXINE\*:TI,AB,DE OR EFFEXOR:TI,AB,DE OR TREVILOR:TI,AB,DE OR VANDRAL:TI,AB,DE OR EFEXOR:TI,AB,DE OR DOBUPAL:TI,AB,DE OR REDUCTIL:TI,AB,DE OR MERIDIA:TI,AB,DE OR 'MILNACIPRAN':TI,AB,DE OR MIDALCIPRAN:TI,AB,DE OR LEVOMILNACIPRAN:TI,AB,DE OR SAVELLA:TI,AB,DE OR DESVENLAFAXINE:TI,AB,DE OR CLOMIPRAMINE:TI,AB,DE OR MILNACIPRAN:TI,AB,DE OR SIBUTRAMINE:TI,AB,DE OR 'TRIPLE REUPTAKE INHIBITOR':TI,AB,DE OR HYDIPHEN:TI,AB,DE OR ANAFRANIL:TI,AB,DE OR SNRIS:TI,AB,DE OR SSNRI:TI,AB,DE OR SNRI\*:TI,AB,DE OR 'DUAL MONOAMINE REUPTAKE INHIBITOR':TI,AB,DE OR 'DUAL MONOAMINE UPTAKE INHIBITOR':TI,AB,DE OR 'DUAL REUPTAKE INHIBITOR':TI,AB,DE OR 'DUAL UPTAKE INHIBITOR':TI,AB,DE OR 'NORADRENALIN SEROTONIN REUPTAKE INHIBITOR':TI,AB,DE OR 'NORADRENALIN SEROTONIN UPTAKE INHIBITOR':TI,AB,DE OR 'NOREPINEPHRINE SEROTONIN REUPTAKE INHIBITOR':TI,AB,DE OR 'NOREPINEPHRINE SEROTONIN UPTAKE INHIBITOR':TI,AB,DE OR 'SELECTIVE SEROTONIN NORADRENALIN REUPTAKE INHIBITOR':TI,AB,DE OR 'SEROTONIN AND NORADRENALINE REUPTAKE INHIBITOR':TI,AB,DE OR 'SEROTONIN AND NORADRENALINE REUPTAKE INHIBITORS':TI,AB,DE OR 'SEROTONIN AND NORADRENALINE UPTAKE INHIBITOR':TI,AB,DE OR 'SEROTONIN AND NOREPINEPHRINE REUPTAKE INHIBITOR':TI,AB,DE OR 'SEROTONIN AND NOREPINEPHRINE UPTAKE

INHIBITOR':TI,AB,DE OR 'SEROTONIN NORADRENALIN UPTAKE  
INHIBITOR':TI,AB,DE OR 'SEROTONIN NOREPINEPHRINE REUPTAKE  
INHIBITOR':TI,AB,DE OR 'SEROTONIN NOREPINEPHRINE UPTAKE  
INHIBITOR':TI,AB,DE) AND 'SEROTONIN AND NORADRENALINE REUPTAKE  
INHIBITOR':TI,AB,DE) OR '2-HYDROXYDESIPRAMINE':TI,AB,DE OR  
AMINEPTIN:TI,AB,DE OR AMITRIPTYLINE:TI,AB,DE OR CLOMIPRAMINE:TI,AB,DE OR  
CYCLOBENZAPRINE:TI,AB,DE OR DESIPRAMINE:TI,AB,DE OR  
DESMETHYLDOXEPIN:TI,AB,DE OR DIBENZEPIN:TI,AB,DE OR DOTHIEPIN:TI,AB,DE  
OR DOXEPIN:TI,AB,DE OR IMIPRAMINE:TI,AB,DE OR IPRINDOLE:TI,AB,DE OR  
LOFEPRAMINE:TI,AB,DE OR MELITRACENE:TI,AB,DE OR METAPRAMINE:TI,AB,DE  
OR MIRTAZAPINE:TI,AB,DE OR NORTRIPTYLINE:TI,AB,DE OR NOXIPTILIN:TI,AB,DE  
OR OPIPRAMOL:TI,AB,DE OR PROTRIPTYLINE:TI,AB,DE OR TIANEPTINE:TI,AB,DE  
OR TRIMIPRAMINE:TI,AB,DE OR 'TRICYCLIC ANTIDEPRESSANT':TI,AB,DE OR  
'TRICYCLIC ANTIDEPRESSANTS':TI,AB,DE OR PREGABALIN:TI,AB,DE OR  
LYRICA:TI,AB,DE OR METHOTREXATE\*:TI,AB,DE OR AMETHOPTERIN\*:TI,AB,DE OR  
MEXATE:TI,AB,DE OR 'METHYLPTEROYLGLUTAMIC ACID':TI,AB,DE OR 'A  
METHOPTERINE':TI,AB,DE OR AMETOPTERINE\*:TI,AB,DE OR 'CL 14377':TI,AB,DE  
OR EMTHEXAT:TI,AB,DE OR EMTREXATE:TI,AB,DE OR FOLEX:TI,AB,DE OR  
'INTRADOSE MTX':TI,AB,DE OR LEDERTREXATE:TI,AB,DE OR METEX:TI,AB,DE OR  
METHROTREXATE:TI,AB,DE OR METHYLAMINOPTERIN:TI,AB,DE OR  
METOJECT:TI,AB,DE OR METOTHREXATE:TI,AB,DE OR 'METOTHREXATE  
SODIUM':TI,AB,DE OR METOTREXAT:TI,AB,DE OR METOTREXATE:TI,AB,DE OR  
METREX:TI,AB,DE OR 'MPI 5004':TI,AB,DE OR MTX:TI,AB,DE OR  
NEOTREXATE:TI,AB,DE OR 'NSC 740':TI,AB,DE OR OTREXUP:TI,AB,DE OR  
RHEUMATREX:TI,AB,DE OR TEXATE:TI,AB,DE OR TREXALL:TI,AB,DE OR  
'LUMICOLCHICINES':TI,AB,DE OR DEMECOLCINE:TI,AB,DE OR  
COLCHAMINE:TI,AB,DE OR COLCEMIDE:TI,AB,DE OR COLCEMID:TI,AB,DE OR  
COLCHICINE:TI,AB,DE OR 'DIHYDROTACHYSTEROL':TI,AB,DE OR  
TACHYSTIN:TI,AB,DE OR DIHYDROTACHYSTERIN:TI,AB,DE OR  
CALCAMINE:TI,AB,DE OR '25-HYDROXYVITAMIN D 2':TI,AB,DE OR  
ERCALCIDIOL:TI,AB,DE OR 'VITAMIN D2':TI,AB,DE OR 'VITAMIN D3':TI,AB,DE OR  
ERGOCALCIFEROL\*:TI,AB,DE OR CALCIFEROLS:TI,AB,DE OR  
HYDROXYCHOLECALCIFEROLS:TI,AB,DE OR 'HYDROXYVITAMINS D':TI,AB,DE OR  
HYDROXYCHOLECALCIFEROL:TI,AB,DE OR CHOLECALCIFEROL:TI,AB,DE OR  
CALCIOL:TI,AB,DE OR CHOLECALCIFEROLS:TI,AB,DE OR 'VITAMIN D':TI,AB,DE OR  
CALCITRIOL:TI,AB,DE OR DIHYDROXYCHOLECALCIFEROL:TI,AB,DE OR '24,25-  
DIHYDROXY VITAMIN D3':TI,AB,DE OR 'EICOSAPENTAENOIC ACID':TI,AB,DE OR  
'TIMNODONIC ACID':TI,AB,DE OR DOCOSAHEXAENOATE:TI,AB,DE OR  
'DOCOSAHEXAENOIC ACID':TI,AB,DE OR 'OMEGA-3 FATTY ACID':TI,AB,DE OR 'N3  
FATTY ACID':TI,AB,DE OR 'N3 PUFA':TI,AB,DE OR 'N3 POLYUNSATURATED FATTY  
ACID':TI,AB,DE OR 'N3 OILS':TI,AB,DE OR 'N-3 PUFA':TI,AB,DE OR 'N-3 FATTY  
ACID':TI,AB,DE OR 'N 3 FATTY ACID':TI,AB,DE OR 'N-3 POLYUNSATURATED FATTY  
ACID':TI,AB,DE OR 'N 3 POLYUNSATURATED FATTY ACID':TI,AB,DE OR 'OMEGA 3  
FATTY ACID':TI,AB,DE OR 'N-3 OILS':TI,AB,DE OR 'N 3 OILS':TI,AB,DE OR 'FISH

OILS':TI,AB,DE OR 'FISH LIVER OIL':TI,AB,DE OR 'EICOSAPENTAENOIC ACIDS':TI,AB,DE OR 'TIMNODONIC ACIDS':TI,AB,DE OR 'DOCOSAHEXAENOIC ACIDS':TI,AB,DE OR 'OMEGA-3 FATTY ACIDS':TI,AB,DE OR 'N3 FATTY ACIDS':TI,AB,DE OR 'N3 POLYUNSATURATED FATTY ACIDS':TI,AB,DE OR 'N3 OIL':TI,AB,DE OR 'N-3 FATTY ACIDS':TI,AB,DE OR 'N 3 FATTY ACIDS':TI,AB,DE OR 'N-3 POLYUNSATURATED FATTY ACIDS':TI,AB,DE OR 'N 3 POLYUNSATURATED FATTY ACIDS':TI,AB,DE OR 'OMEGA 3 FATTY ACIDS':TI,AB,DE OR 'N-3 OIL':TI,AB,DE OR 'N 3 OIL':TI,AB,DE OR 'COD LIVER OIL':TI,AB,DE OR 'FISH OIL':TI,AB,DE OR 'FISH LIVER OILS':TI,AB,DE OR INFLIXIMAB\*:TI,AB,DE OR 'MAB CA2':TI,AB,DE OR 'MONOCLONAL ANTIBODY CA2':TI,AB,DE OR REMICADE:TI,AB,DE OR ETANERCEPT\*:TI,AB,DE OR 'TNF RECEPTOR TYPE II-IGG FUSION PROTEIN':TI,AB,DE OR 'TNF RECEPTOR TYPE II IGG FUSION PROTEIN':TI,AB,DE OR ENBREL:TI,AB,DE OR 'TNFR-FC FUSION PROTEIN':TI,AB,DE OR 'TNFR FC FUSION PROTEIN':TI,AB,DE OR 'TNR-001':TI,AB,DE OR 'TNR 001':TI,AB,DE OR 'TNT RECEPTOR FUSION PROTEIN':TI,AB,DE OR ADALIMUMAB\*:TI,AB,DE OR 'D2E7 ANTIBODY':TI,AB,DE OR HUMIRA:TI,AB,DE OR 'CERTOLIZUMAB PEGOL':TI,AB,DE OR CERTOLIZUMAB\*:TI,AB,DE OR CIMZIA\*:TI,AB,DE OR 'CDP 870':TI,AB,DE OR 'GOLIMUMAB':TI,AB,DE OR SIMPONI:TI,AB,DE OR 'ANTI TUMOR NECROSIS FACTOR AGENT':TI,AB,DE OR 'ANTI TUMOUR NECROSIS FACTOR AGENT':TI,AB,DE OR 'TNF ALPHA INHIBITOR':TI,AB,DE OR 'TNF INHIBITOR':TI,AB,DE OR 'TUMOUR NECROSIS FACTOR ALPHA INHIBITOR':TI,AB,DE OR 'TUMOUR NECROSIS FACTOR INHIBITOR':TI,AB,DE OR 'ANTI-TNF ALPHA AGENT':TI,AB,DE OR 'ANTI TNF ALPHA AGENT':TI,AB,DE OR 'ANTI TNF AGENT':TI,AB,DE OR 'ANTI-TNF AGENT':TI,AB,DE OR 'TUMOR NECROSIS FACTOR INHIBITOR':TI,AB,DE OR 'TUMOR NECROSIS FACTOR ALPHA INHIBITOR':TI,AB,DE OR 'TNF-ALPHA INHIBITOR':TI,AB,DE OR 'CACHECTIN INHIBITOR':TI,AB,DE OR 'TNF BLOCKER':TI,AB,DE OR 'TNF ALPHA BLOCKER':TI,AB,DE OR 'TUMOR NECROSIS FACTOR ALPHA BLOCKER':TI,AB,DE OR 'TUMOUR NECROSIS FACTOR ALPHA BLOCKER':TI,AB,DE OR 'TUMOR NECROSIS FACTOR BLOCKER':TI,AB,DE OR 'TUMOUR NECROSIS FACTOR BLOCKER':TI,AB,DE OR INFLECTRA:TI,AB,DE OR 'INFLIXIMAB-DYYB':TI,AB,DE OR 'D2E7 ANTIBODIES':TI,AB,DE OR 'INTERLEUKIN 1 RECEPTOR ANTAGONIST PROTEIN':TI,AB,DE OR 'IL 1 FEBRILE INHIBITOR':TI,AB,DE OR KINERET:TI,AB,DE OR ANAKINRA:TI,AB,DE OR ANTRIL:TI,AB,DE OR 'IL1 FEBRILE INHIBITOR':TI,AB,DE OR 'IL-1RA':TI,AB,DE OR 'ANTI-IL-1':TI,AB,DE OR 'ANTI-INTERLEUKIN-1':TI,AB,DE OR 'IL-1 INHIBITOR':TI,AB,DE OR 'IL-1 ANTAGONIST':TI,AB,DE OR 'INTERLEUKIN 1 INHIBITOR':TI,AB,DE OR 'INTERLEUKIN 1 ANTAGONIST':TI,AB,DE) AND [EMBASE]/LIM NOT ([EMBASE]/LIM AND [MEDLINE]/LIM) AND ('ARTICLE'/IT OR 'ARTICLE IN PRESS'/IT OR 'REVIEW'/IT))

## 2. HAND

#36. #34 NOT #35

#35. 'letter'/exp OR 'editorial'/exp OR 'case

report'/exp

#34. #32 NOT #33

#33. 'juvenile'/exp NOT ('juvenile'/exp AND  
'adult'/exp)

#32. #30 NOT #31

#31. 'animal'/exp NOT ('animal'/exp AND 'human'/exp)

#30. #29 AND [embase]/lim NOT ([embase]/lim AND  
[medline]/lim) AND ('Article'/it OR 'Article in  
Press'/it OR 'Review'/it)

#29. #1 AND #27 AND [english]/lim

#28. #1 AND #27

#27. #2 OR #3 OR #4 OR #5 OR #6 OR #7 OR #8 OR #9 OR  
#10 OR #11 OR #12 OR #13 OR #14 OR #15 OR #16 OR  
#17 OR #18 OR #19 OR #20 OR #21 OR #22 OR #23 OR  
#24 OR #25 OR #26

#26. splint:ti,ab,de OR 'static orthosis':ti,ab,de OR  
'static orthoses':ti,ab,de

#25. spica:ti,ab,de

#24. 'muscle strength':ti,ab,de OR 'resistance  
training':ti,ab,de OR 'strength

training':ti,ab,de OR strengthen\*:ti,ab,de

#23. glove\*:ti,ab,de

#22. (finger\*:ti,ab,de OR thumb\*:ti,ab,de OR

digit\*:ti,ab,de) AND (orthos\*ti,ab,de OR

brace\*:ti,ab,de OR 'athletic tape':ti,ab,de OR

kinesiotap\*:ti,ab,de OR 'orthotic tape':ti,ab,de

OR orthotic\*:ti,ab,de OR orthose\*:ti,ab,de OR

parapodium\*:ti,ab,de)

#21. acupuncture\*:ti,ab,de OR

pharmacopuncture\*:ti,ab,de

#20. 'occupational therapy':ti,ab,de OR

physiotherap\*:ti,ab,de OR ergotherap\*:ti,ab,de OR

'physical therapy':ti,ab,de

#19. ('health education':ti,ab,de OR 'consumer health

information':ti,ab,de OR 'educating

patients':ti,ab,de OR 'education

program':ti,ab,de OR 'educational

program':ti,ab,de OR 'education of

patient':ti,ab,de OR 'patient education':ti,ab,de

OR 'training program') AND (patient:ti,ab,de OR

patients:ti,ab,de OR 'patient-centered':ti,ab,de  
OR 'patient-focused':ti,ab,de)

#18. 'cold bath':ti,ab,de OR 'cryogenic  
therapy':ti,ab,de OR cryotherm\*:ti,ab,de OR  
'cryo-treatment':ti,ab,de OR  
cryotreatment\*:ti,ab,de OR 'cooling  
therapy':ti,ab,de OR 'cold treatment':ti,ab,de OR  
'therapeutic cooling':ti,ab,de OR  
cryotherap\*:ti,ab,de OR 'cold therapy':ti,ab,de  
OR hypotherm\*:ti,ab,de OR 'ice therapy':ti,ab,de  
OR 'ice pack':ti,ab,de

#17. 'heat treatment':ti,ab,de OR 'thermal  
therapy':ti,ab,de OR diatherm\*:ti,ab,de OR  
'hyperthermic therapy':ti,ab,de OR 'heat  
therapy':ti,ab,de OR 'therapeutic heat':ti,ab,de  
OR 'heat application':ti,ab,de OR 'induced  
hyperthermia':ti,ab,de OR thermotherap\*:ti,ab,de  
OR 'local heat':ti,ab,de OR 'hot pack':ti,ab,de  
OR 'heating pad':ti,ab,de OR diatherap\*:ti,ab,de  
OR diathermia:ti,ab,de OR inductothermy:ti,ab,de

#16. paraffinum:ti,ab,de OR paraffin\*:ti,ab,de

#15. exercise\*:ti,ab,de OR 'exercise therapy':ti,ab,de

#14. 'iontophoresis'/exp OR iontophore\*:ti,ab,de

#13. 'iontophoresis'/exp

#12. ('joint injection':ti,ab,de OR

intraarticular\*:ti,ab,de OR

'intra-articular':ti,ab,de OR 'intra

articular':ti,ab,de) AND (dexasone:ti,ab,de OR

maxidex:ti,ab,de OR millicorten:ti,ab,de OR

oradexon:ti,ab,de OR hexadrol:ti,ab,de OR

betamethasone:ti,ab,de OR celestona:ti,ab,de OR

celeston:ti,ab,de OR celestone:ti,ab,de OR

'triamcinolone acetonide':ti,ab,de OR

triamcinolone:ti,ab,de OR 'tricot-40':ti,ab,de

OR 'tricot 40':ti,ab,de OR kenalog:ti,ab,de OR

azmacort:ti,ab,de OR kenacort:ti,ab,de OR

'methylprednisolone acetate':ti,ab,de OR

methylprednisolone\*:ti,ab,de OR

'depo-medrol':ti,ab,de OR 'depo-medrone':ti,ab,de

OR 'adrenocortical hormone':ti,ab,de OR 'adrenal

cortex hormones':ti,ab,de OR 'adrenal cortex  
hormone':ti,ab,de OR corticosteroid\*:ti,ab,de OR  
corticoid\*:ti,ab,de OR steroid\*:ti,ab,de) OR  
adant:ti,ab,de OR 'adant dispo':ti,ab,de OR  
arthrease:ti,ab,de OR artz:ti,ab,de OR  
bionect:ti,ab,de OR duovisc:ti,ab,de OR  
durolane:ti,ab,de OR eyecon:ti,ab,de OR 'healon  
yellow':ti,ab,de OR healon5:ti,ab,de OR  
healonid:ti,ab,de OR hialid:ti,ab,de OR  
hyalcon:ti,ab,de OR hyalein:ti,ab,de OR  
hyalgan:ti,ab,de OR hyalovet:ti,ab,de OR  
hyalubrix:ti,ab,de OR hyaluronate:ti,ab,de OR  
'hyaluronate sodium':ti,ab,de OR  
hylaform:ti,ab,de OR 'hylan g f 20':ti,ab,de OR  
'hylan g-f 20':ti,ab,de OR 'hylartin v':ti,ab,de  
OR 'hylo-comod':ti,ab,de OR hyruan:ti,ab,de OR  
ialugen:ti,ab,de OR juvederm:ti,ab,de OR  
'lagricel ofteno':ti,ab,de OR laservis:ti,ab,de  
OR 'me 3710':ti,ab,de OR monovisc:ti,ab,de OR 'na  
hylan':ti,ab,de OR 'na-hylan':ti,ab,de OR 'nrd



101':ti,ab,de OR nrd101:ti,ab,de OR  
ophthalin:ti,ab,de OR orthovisc:ti,ab,de OR  
ostenil:ti,ab,de OR perlane:ti,ab,de OR  
'potassium hyaluronate':ti,ab,de OR  
provisc:ti,ab,de OR radiaplexrx:ti,ab,de OR  
restylane:ti,ab,de OR 'si 4402':ti,ab,de OR  
sinovial:ti,ab,de OR 'sl 1010':ti,ab,de OR  
'sodium hyaluronate':ti,ab,de OR 'sperm  
select':ti,ab,de OR supartz:ti,ab,de OR  
suplasyn:ti,ab,de OR synocrom:ti,ab,de OR  
synvisc:ti,ab,de OR teosyal:ti,ab,de OR  
viscoseal:ti,ab,de OR vismed:ti,ab,de OR  
vitrax:ti,ab,de OR 'hyaluronic acid':ti,ab,de OR  
'amo vitrax':ti,ab,de OR biolon:ti,ab,de OR  
hyaluronan:ti,ab,de OR hyvisc:ti,ab,de OR  
luronit:ti,ab,de OR amvisc:ti,ab,de OR  
healon:ti,ab,de

#11. capsaicin:ti,ab,de OR capsaicine:ti,ab,de OR  
axsain:ti,ab,de OR zostrix:ti,ab,de OR  
capzasin:ti,ab,de OR 'ngx-4010':ti,ab,de OR 'ngx

4010':ti,ab,de OR capsin:ti,ab,de OR  
adlea:ti,ab,de OR 'algrx 4975':ti,ab,de OR  
biozone:ti,ab,de OR 'decenoic acid':ti,ab,de OR  
qutenza:ti,ab,de

#10. (hydrogel\*:ti,ab,de OR tape:ti,ab,de  
tapes:ti,ab,de OR patch\*:ti,ab,de OR  
percutaneous\*:ti,ab,de OR ointment\*:ti,ab,de OR  
transdermal\*:ti,ab,de OR cutaneous\*:ti,ab,de OR  
'dermal administration':ti,ab,de OR  
intraepidermal\*:ti,ab,de OR paste\*:ti,ab,de OR  
gel:ti,ab,de OR gels:ti,ab,de OR  
topical\*:ti,ab,de OR transcutaneous\*:ti,ab,de)  
AND ('nonsteroidal antiinflammatory  
agent':ti,ab,de OR 'nonsteroidal  
anti-inflammatory agent':ti,ab,de OR  
'nonsteroidal anti inflammatory agent':ti,ab,de  
OR nsaid\*:ti,ab,de OR 'non-steroidal  
anti-inflammatory agent':ti,ab,de OR 'non  
steroidal anti inflammatory agent':ti,ab,de OR  
'aspirin-like agent':ti,ab,de OR

'anti-inflammatory analgesic':ti,ab,de OR

'non-steroidal anti-rheumatic agent':ti,ab,de OR

'non-steroidal antirheumatic agent':ti,ab,de)

#9. 'nerve growth factor antiserum':ti,ab,de OR 'ngf

antiserum':ti,ab,de OR 'antiserum ngf':ti,ab,de

OR 'anti-nerve growth factor':ti,ab,de OR

tanezumab:ti,ab,de OR 'nerve growth factor

antibody':ti,ab,de OR 'nerve growth factor

antibodies':ti,ab,de OR 'nerve growth factor

antagonist':ti,ab,de OR 'nerve growth factor

antagonists':ti,ab,de OR 'nerve growth factor

inhibitor':ti,ab,de OR 'nerve growth factor

inhibitors':ti,ab,de OR 'anti-ngf':ti,ab,de OR

fulranumab:ti,ab,de OR 'nerve growth factor

blocker':ti,ab,de OR 'ngf inhibitor':ti,ab,de OR

'ngf antagonist':ti,ab,de OR 'ngf

blocker':ti,ab,de OR 'ngf-ab':ti,ab,de OR

fasinumab:ti,ab,de

#8. duloxetine\*:ti,ab,de OR 'ly 248686':ti,ab,de OR

'ly-248686':ti,ab,de OR cymbalta\*:ti,ab,de

#7. tramadol\*:ti,ab,de OR tramundin:ti,ab,de OR  
dalgic OR 'k-315':ti,ab,de OR 'k 315':ti,ab,de OR  
k315:ti,ab,de OR nobligan:ti,ab,de OR  
zytram:ti,ab,de OR tiral:ti,ab,de OR  
topalgic:ti,ab,de OR 'trama abz':ti,ab,de OR  
'trama kd':ti,ab,de OR 'trama dorsch':ti,ab,de OR  
'ranitidin 1a pharma':ti,ab,de OR 'trama 1a  
pharma':ti,ab,de OR ultram:ti,ab,de OR  
zydol:ti,ab,de OR tramadolor:ti,ab,de OR  
tramal:ti,ab,de OR adolonta:ti,ab,de OR  
contramal:ti,ab,de

#6. alfentanil:ti,ab,de OR alphaprodine:ti,ab,de OR  
'beta-casomorphins':ti,ab,de OR  
buprenorphine:ti,ab,de OR butorphanol:ti,ab,de OR  
carfentanil:ti,ab,de OR codeine:ti,ab,de OR  
dermorphin:ti,ab,de OR dextromoramide:ti,ab,de OR  
dextropropoxyphene:ti,ab,de OR dezocine:ti,ab,de  
OR dihydrocodeine:ti,ab,de OR  
dihydromorphine:ti,ab,de OR  
diphenoxylate:ti,ab,de OR 'endomorphin

1':ti,ab,de OR 'endomorphin 2':ti,ab,de OR  
eseroline:ti,ab,de OR  
ethylketocyclazocine:ti,ab,de OR  
ethylmorphine:ti,ab,de OR etorphine:ti,ab,de OR  
fentanyl:ti,ab,de OR heroin:ti,ab,de OR  
hydrocodone:ti,ab,de OR hydromorphone:ti,ab,de OR  
ketobemidone:ti,ab,de OR levorphanol:ti,ab,de OR  
lofentanil:ti,ab,de OR meperidine:ti,ab,de OR  
meptazinol:ti,ab,de OR methadone:ti,ab,de OR  
'methadyl acetate':ti,ab,de OR morphine:ti,ab,de  
OR nalbuphine:ti,ab,de OR nocistatin:ti,ab,de OR  
normethadone:ti,ab,de OR 'opiate  
alkaloids':ti,ab,de OR oxycodone:ti,ab,de OR  
oxymorphone:ti,ab,de OR paracymethadol:ti,ab,de  
OR pentazocine:ti,ab,de OR phenazocine:ti,ab,de  
OR phenoperidine:ti,ab,de OR  
pirinitramide:ti,ab,de OR promedol:ti,ab,de OR  
protopine:ti,ab,de OR remifentanil:ti,ab,de OR  
sufentanil:ti,ab,de OR tilidine:ti,ab,de OR  
oxycontin:ti,ab,de OR algopan:ti,ab,de OR

biopon:ti,ab,de OR laudanum:ti,ab,de OR  
nepenthe:ti,ab,de OR omnopon:ti,ab,de OR  
opial:ti,ab,de OR opium:ti,ab,de OR opon:ti,ab,de  
OR pantopon:ti,ab,de OR papaveretum:ti,ab,de OR  
pavon:ti,ab,de OR tetrapon:ti,ab,de OR  
opiod\*:ti,ab,de OR opiate\*:ti,ab,de

#5. chondroitin\*:ti,ab,de

#4. glucosamide:ti,ab,de OR 'd glucose

amine':ti,ab,de OR 'glucose amine':ti,ab,de OR

'nsc 758':ti,ab,de OR dona:ti,ab,de OR 'dona

s':ti,ab,de OR glucosamine\*:ti,ab,de OR

'2-amino-2-deoxyglucose':ti,ab,de OR '2 amino 2

deoxyglucose':ti,ab,de

#3. hydroxyacetanilide:ti,ab,de OR apap:ti,ab,de OR

'p-acetamidophenol':ti,ab,de OR

'p-hydroxyacetanilide':ti,ab,de OR

paracetamol:ti,ab,de OR acetamidophenol:ti,ab,de

OR acephen:ti,ab,de OR tylenol:ti,ab,de OR

anacin\*:ti,ab,de OR panadol:ti,ab,de OR

acamol:ti,ab,de OR acetaminophen:ti,ab,de

#2. (('cyclooxygenase inhibitor':ti,ab,de OR  
'cyclooxygenase 2 inhibitor':ti,ab,de OR  
'nonsteroidal antiinflammatory agent':ti,ab,de OR  
'nonsteroidal anti inflammatory agent':ti,ab,de  
OR 'non-steroidal anti-inflammatory  
agent':ti,ab,de OR 'non steroidal anti  
inflammatory agent':ti,ab,de OR 'aspirin-like  
agent':ti,ab,de OR 'anti-inflammatory  
analgesic':ti,ab,de OR 'non-steroidal  
anti-rheumatic agent':ti,ab,de OR 'non-steroidal  
antirheumatic agent':ti,ab,de OR nsaid\*:ti,ab,de  
OR 'a 771726':ti,ab,de OR aceclofenac:ti,ab,de OR  
acemetacin:ti,ab,de OR acetosyringone:ti,ab,de OR  
acetovanillone:ti,ab,de OR 'acetylsalicylic acid  
lysinate':ti,ab,de OR adapalene:ti,ab,de OR  
alclofenac:ti,ab,de OR alminoprofen:ti,ab,de OR  
amiprilose:ti,ab,de OR ampyrone:ti,ab,de OR  
andrographolide:ti,ab,de OR anisodamine:ti,ab,de  
OR anisodine:ti,ab,de OR 'antiflammin  
p2':ti,ab,de OR antipyrine:ti,ab,de OR

apazone:ti,ab,de OR apremilast:ti,ab,de OR  
arteparon:ti,ab,de OR arthrotec:ti,ab,de OR  
aspirin:ti,ab,de OR atrinositol:ti,ab,de OR  
azulene:ti,ab,de OR baicalin:ti,ab,de OR  
balsalazide:ti,ab,de OR bendazac:ti,ab,de OR  
benorilate:ti,ab,de OR benoxaprofen:ti,ab,de OR  
benzobarbital:ti,ab,de OR berbamine:ti,ab,de OR  
betulinic) AND acid:ti,ab,de OR bevonium:ti,ab,de  
OR biphenylacetic) AND acid:ti,ab,de OR  
boldine:ti,ab,de OR bredinin:ti,ab,de OR  
bromfenac:ti,ab,de OR bucillamine:ti,ab,de OR  
bufexamac:ti,ab,de OR bumadizone:ti,ab,de OR  
butibufen:ti,ab,de OR 'carbaspirin  
calcium':ti,ab,de OR 'carbon fiber':ti,ab,de OR  
carprofen:ti,ab,de OR caryophyllene:ti,ab,de OR  
castanospermine:ti,ab,de OR 'cdp 571':ti,ab,de OR  
celecoxib:ti,ab,de OR cepharanthine:ti,ab,de OR  
'chloroquine diphosphate':ti,ab,de OR 'choline  
magnesium trisalicylate':ti,ab,de OR  
chrysarobin:ti,ab,de OR clonixin:ti,ab,de OR 'cp



96345':ti,ab,de OR curcumin:ti,ab,de OR  
dauricine:ti,ab,de OR 'dexketoprofen  
trometamol':ti,ab,de OR diclofenac:ti,ab,de OR  
difenpiramide:ti,ab,de OR diflunisal:ti,ab,de OR  
dimephosphon:ti,ab,de OR dipyrone:ti,ab,de OR  
diucifon:ti,ab,de OR droxicam:ti,ab,de OR 'dup  
697':ti,ab,de OR ebselen:ti,ab,de OR  
efamol:ti,ab,de OR eltenac:ti,ab,de OR 'enfenamic  
acid':ti,ab,de OR epirizole:ti,ab,de OR  
etanercept:ti,ab,de OR ethenzamide:ti,ab,de OR  
ethonium:ti,ab,de OR etodolac:ti,ab,de OR  
etofenamate:ti,ab,de OR etoricoxib:ti,ab,de OR  
'fenamic acid':ti,ab,de OR fenbufen:ti,ab,de OR  
fenclofenac:ti,ab,de OR fenflumizole:ti,ab,de OR  
fenoprofen:ti,ab,de OR fentiazac:ti,ab,de OR  
fepradinol:ti,ab,de OR feprazone:ti,ab,de OR  
'ferulic acid':ti,ab,de OR floctafenine:ti,ab,de  
OR flosulide:ti,ab,de OR flunixin:ti,ab,de OR  
flunoxaprofen:ti,ab,de OR fluproquazone:ti,ab,de  
OR flurbiprofen:ti,ab,de OR 'fr 167653':ti,ab,de

OR 'fr 173657':ti,ab,de OR glucametacin:ti,ab,de  
OR guacetisal:ti,ab,de OR helenalin:ti,ab,de OR  
heliodermin:ti,ab,de OR hemodes:ti,ab,de OR  
higenamine:ti,ab,de OR ibuprofen:ti,ab,de OR  
ibuproxam:ti,ab,de OR icatibant:ti,ab,de OR 'ih  
764-3':ti,ab,de OR  
'imidazole-2-hydroxybenzoate':ti,ab,de OR  
indobufen:ti,ab,de OR indomethacin:ti,ab,de OR  
indoprofen:ti,ab,de OR iodoantipyrine:ti,ab,de OR  
isoxicam:ti,ab,de OR kebuzone:ti,ab,de OR  
ketoprofen:ti,ab,de OR ketorolac:ti,ab,de OR 'I  
745337':ti,ab,de OR 'I 778736':ti,ab,de OR  
'lipoxin a4':ti,ab,de OR 'lipoxin b4':ti,ab,de OR  
lisofylline:ti,ab,de OR lobenzarit:ti,ab,de OR  
lonazolac:ti,ab,de OR lornoxicam:ti,ab,de OR  
loxoprofen:ti,ab,de OR lumiracoxib:ti,ab,de OR  
'magnesium salicylate':ti,ab,de OR  
magnolol:ti,ab,de OR manoalide:ti,ab,de OR  
masoprocol:ti,ab,de OR 'meclofenamic  
acid':ti,ab,de OR 'mefenamic acid':ti,ab,de OR

meloxicam:ti,ab,de OR mesalamine:ti,ab,de OR  
mofebutazone:ti,ab,de OR mofezolac:ti,ab,de OR  
nabumetone:ti,ab,de OR nafamostat:ti,ab,de OR  
naproxen:ti,ab,de OR nebacetin:ti,ab,de OR  
nepafenac:ti,ab,de OR nifenazone:ti,ab,de OR  
'niflumic acid':ti,ab,de OR nimesulide:ti,ab,de  
OR nitroaspirin:ti,ab,de OR 'olopatadine  
hydrochloride':ti,ab,de OR olsalazine:ti,ab,de OR  
olvanil:ti,ab,de OR 'oren gedoku to':ti,ab,de OR  
orgotein:ti,ab,de OR oxaprozin:ti,ab,de OR  
oxyphenbutazone:ti,ab,de OR palmidrol:ti,ab,de OR  
parecoxib:ti,ab,de OR parthenolide:ti,ab,de OR  
peoniflorin:ti,ab,de OR phenidone:ti,ab,de OR  
phenylbutazone:ti,ab,de OR pimecrolimus:ti,ab,de  
OR pirfenidone:ti,ab,de OR piroxicam\*:ti,ab,de OR  
pirprofen:ti,ab,de OR proglumetacin:ti,ab,de OR  
propacetamol:ti,ab,de OR  
propionylcarnitine:ti,ab,de OR  
propyphenazone:ti,ab,de OR proquazone:ti,ab,de OR  
pyranoprofen:ti,ab,de OR pyrazolone:ti,ab,de OR

pyrogenal:ti,ab,de OR resveratrol:ti,ab,de OR  
rofecoxib:ti,ab,de OR 'rosmarinic acid':ti,ab,de  
OR rumalon:ti,ab,de OR 'saiko-keishi-to':ti,ab,de  
OR saikosaponin:ti,ab,de OR salicin:ti,ab,de OR  
salicylamide:ti,ab,de OR salicylates:ti,ab,de OR  
'salicylsalicylic acid':ti,ab,de OR 'sb  
203580':ti,ab,de OR 'sc 299':ti,ab,de OR 'sc  
41930':ti,ab,de OR 'sc 560':ti,ab,de OR  
semapimod:ti,ab,de OR seratrodist:ti,ab,de OR  
serratiopeptidase:ti,ab,de OR shikonin:ti,ab,de  
OR sinapaldehyde:ti,ab,de OR 'sodium  
salicylate':ti,ab,de OR 'st 679':ti,ab,de OR  
sulfasalazine:ti,ab,de OR sulindac:ti,ab,de OR  
suprofen:ti,ab,de OR suxibuzone:ti,ab,de OR  
tanshinone:ti,ab,de OR taxifolin:ti,ab,de OR  
tenidap:ti,ab,de OR tenoxicam:ti,ab,de OR  
tepoxalin:ti,ab,de OR 'tiaprofenic acid':ti,ab,de  
OR tiaramide:ti,ab,de OR tinoridine:ti,ab,de OR  
'tolfenamic acid':ti,ab,de OR tolmetin:ti,ab,de  
OR tranilast:ti,ab,de OR tribenoside:ti,ab,de OR

'ursolic acid':ti,ab,de OR valdecoxib:ti,ab,de OR  
zileuton:ti,ab,de OR zomepirac:ti,ab,de

#1. (osteoarthritis\*:ti,ab,de OR

osteoarthritides:ti,ab,de OR 'degenerative

arthritides':ti,ab,de OR 'degenerative

arthritis':ti,ab,de OR 'noninflammatory

arthritis':ti,ab,de OR 'non-inflammatory

arthritis':ti,ab,de OR arthrosis:ti,ab,de OR

'degenerative joint disease':ti,ab,de OR

'osteo-arthritis':ti,ab,de OR

'osteo-arthrosis':ti,ab,de OR

osteoarthrosis:ti,ab,de OR 'rheumatoid

arthrosis':ti,ab,de) AND (hand:ti,ab,de OR

hands:ti,ab,de OR finger\*:ti,ab,de OR

thumb\*:ti,ab,de OR metacarp\*:ti,ab,de OR

wrist\*:ti,ab,de)

**COCHRANE CENTRAL REGISTER OF CONTROLLED TRIALS (CENTRAL)**

|                                                                      |                                                                                                                                                   |
|----------------------------------------------------------------------|---------------------------------------------------------------------------------------------------------------------------------------------------|
| MeSH descriptor = Medical Subject Heading                            | ti,ab,kw = Word appears in title, abstract or keyword field of record                                                                             |
| near/2 = Terms must be within two words of each other                | Next = terms must be adjacent, e.g. bone next density means that the term beginning with bone must be adjacent to the term beginning with density |
| * = truncation symbol                                                |                                                                                                                                                   |
| <b>Boolean Operators</b>                                             |                                                                                                                                                   |
| OR = retrieves results that include at least one of the search terms | AND = retrieves results that include all the search terms                                                                                         |
| NOT = excludes the retrieval of terms from the search                |                                                                                                                                                   |

## 1. HIP OR KNEE

- ID SEARCH
- #1 MESH DESCRIPTOR: [OSTEOARTHRITIS] THIS TERM ONLY
- #2 OSTEOARTHRI\* OR OSTEOARTHRO\* OR DEGENERATIVE ARTHRIT\* OR DEGENERATIVE JOINT DISEASE\* OR NONINFLAMMATORY ARTHRIT\* OR NON-INFLAMMATORY ARTHRIT\* OR ARTHROSIS OR ARTHROSES OR OSTEO-ARTHRI\* OR OSTEO-ARTHROS\*
- #3 MESH DESCRIPTOR: [HIP] EXPLODE ALL TREES
- #4 HIP OR HIPS OR COXA PR COXAS
- #5 #3 OR #4
- #6 (#1 OR #2) AND #5
- #7 MESH DESCRIPTOR: [OSTEOARTHRITIS, HIP] EXPLODE ALL TREES
- #8 #6 OR #7
- #9 COXARTH\* OR HIP OSTEOARTHRI\*
- #10 #8 OR #9
- #11 MESH DESCRIPTOR: [KNEE] EXPLODE ALL TREES
- #12 KNEE\*

#13 #11 OR #12

#14 (#1 OR #2) AND #13

#15 MESH DESCRIPTOR: [OSTEOARTHRITIS, KNEE] EXPLODE ALL TREES

#16 #14 OR #15

#17 #16 OR #10 IN TRIALS

#18 MESH DESCRIPTOR: [ANTI-INFLAMMATORY AGENTS, NON-STEROIDAL] EXPLODE ALL TREES

#19 (NONSTEROIDAL ANTIINFLAMMATORY AGENT\* OR NONSTEROIDAL ANTI INFLAMMATORY AGENT\* OR NON-STEROIDAL ANTI-INFLAMMATORY AGENT\* OR NON STEROIDAL ANTI INFLAMMATORY AGENT\* OR ASPIRIN-LIKE AGENT\* OR ANTI-INFLAMMATORY ANALGESIC\* OR NON-STEROIDAL ANTI-RHEUMATIC AGENT\* OR NON-STEROIDAL ANTIRHEUMATIC AGENT\* OR NSAID\* OR A 771726 OR ACECLOFENAC OR ACEMETACIN OR ACETOSYRINGONE OR ACETOVANILLONE OR ACETYLSALICYLIC ACID LYSINATE OR ADAPALENE OR ALCLOFENAC OR ALMINOPROFEN OR AMIPRILOSE OR AMPYRONE OR ANDROGRAPHOLIDE OR ANISODAMINE OR ANISODINE OR ANTIFLAMMIN P2 OR ANTIPYRINE OR APAZONE OR APREMILAST OR ARTEPARON OR ARTHROTEC OR ASPIRIN OR ATRINOSITOL OR AZULENE OR BAICALIN OR BALSALAZIDE OR BENDAZAC OR BENORILATE OR BENOXAPROFEN OR BENZOBARBITAL OR BERBAMINE OR BETULINIC ACID OR BEVONIUM OR BIPHENYLYLACETIC ACID OR BOLDINE OR BREDININ OR BROMFENAC OR BUCILLAMINE OR BUFXAMAC OR BUMADIZONE OR BUTIBUFEN OR CARBASPIRIN CALCIUM OR CARBON FIBER OR CARPROFEN OR CARYOPHYLLENE OR CASTANOSPERMINE OR CDP 571 OR CELECOXIB OR CEPHARANTHINE OR CHLOROQUINE DIPHOSPHATE OR CHOLINE MAGNESIUM TRISALICYLATE OR CHRYSAROBIN OR CLONIXIN OR CP 96345 OR CURCUMIN OR DAURICINE OR DEXKETOPROFEN TROMETAMOL OR DICLOFENAC OR DICLOFENAC HYDROXYETHYLPYRROLIDINE OR DIFENPIRAMIDE OR DIFLUNISAL OR DIMEPHOSPHON OR DIPYRONE OR DIUCIFON OR DROXICAM OR DUP 697 OR EBSELEN OR EFAMOL OR ELTENAC OR ENFENAMIC ACID OR EPIRIZOLE OR ETANERCEPT OR ETHENZAMIDE OR ETHONIUM OR ETODOLAC OR ETOFENAMATE OR ETORICOXIB OR FENAMIC ACID OR FENBUFEN OR FENCLOFENAC OR FENFLUMIZOLE OR FENOPROFEN OR FENTIAZAC OR FEPRADINOL OR FEPRAZONE OR FERULIC ACID OR FLOCTAFENINE OR FLOSULIDE OR FLUNIXIN OR FLUNIXIN MEGLUMINE OR FLUNOXAPROFEN OR FLUPROQUAZONE OR FLURBIPROFEN OR FLURBIPROFEN AXETIL OR FR 167653 OR FR 173657 OR GLUCAMETACIN OR GUACETISAL OR HELENALIN OR HELIODERMIN OR HEMODES OR HIGENAMINE OR IBUPROFEN OR IBUPROXAM OR ICATIBANT OR IH 764-3 OR IMIDAZOLE-2-HYDROXYBENZOATE OR INDOBUFEN OR INDOMETHACIN OR INDOPROFEN OR IODOANTIPYRINE OR ISOXICAM OR KEBUZONE OR KETOPROFEN OR KETOPROFEN LYSINE OR KETOROLAC OR L 745337 OR L 778736 OR LIPOXIN A4 OR LIPOXIN B4 OR LISOFYLLINE OR LOBENZARIT OR LONAZOLAC OR LORNOXICAM OR LOXOPROFEN OR LUMIRACOXIB OR MAGNESIUM SALICYLATE OR MAGNOLOL OR MANOALIDE OR MASOPROCOL OR MECLOFENAMIC ACID\* OR MEFENAMIC ACID\* OR MELOXICAM OR MESALAMINE OR MOFEBUTAZONE OR MOFEZOLAC OR NABUMETONE OR NAFAMOSTAT OR NAPROXEN OR NEBACETIN OR NEPAFENAC OR NIFENAZONE OR NIFLUMIC ACID OR NIMESULIDE OR NITROASPIRIN OR OLOPATADINE HYDROCHLORIDE OR OLSALAZINE OR OLVANIL OR OREN GEDOKU TO OR ORGOTEIN OR OXAPROZIN OR OXYPHENBUTAZONE OR PALMIDROL OR

PARECOXIB OR PARTHENOLIDE OR PEONIFLORIN OR PHENIDONE OR PHENYLBUTAZONE OR PIMECROLIMUS OR PIRFENIDONE OR PIROXICAM OR PIROXICAM-BETA-CYCLODEXTRIN OR PIRPROFEN OR PROGLUMETACIN OR PROPACETAMOL OR PROPIONYL CARNITINE OR PROPYPHENAZONE OR PROQUAZONE OR PYRANOPROFEN OR PYRAZOLONE OR PYROGENAL OR RESVERATROL OR ROFECOXIB OR ROSMARINIC ACID OR RUMALON OR SAIKO-KEISHI-TO OR SAIKOSAPONIN OR SALICIN OR SALICYLAMIDE OR SALICYLATES OR SALICYLSALICYLIC ACID OR SB 203580 OR SC 299 OR SC 41930 OR SC 560 OR SEMAPIMOD OR SERATRODAST OR SERRATIOPEPTIDASE OR SHIKONIN OR SINAPALDEHYDE OR SODIUM SALICYLATE\* OR ST 679 OR SULFASALAZINE OR SULINDAC OR SULINDAC SULFIDE OR SULINDAC SULFONE OR SUPROFEN OR SUXIBUZONE OR TANSHINONE OR TAXIFOLIN OR TENIDAP OR TENOXICAM OR TEPOXALIN OR TIAPROFENIC ACID OR TIARAMIDE OR TINORIDINE OR TOLFENAMIC ACID OR TOLMETIN OR TRANILAST OR TRIBENOSIDE OR URSOLIC ACID OR VALDECOXIB OR ZILEUTON OR ZOMEPIRAC):TI,AB,KW (WORD VARIATIONS HAVE BEEN SEARCHED)

#20 #18 OR #19

#21 MESH DESCRIPTOR: [ACETAMINOPHEN] EXPLODE ALL TREES

#22 (HYDROXYACETANILIDE OR APAP OR P-ACETAMIDOPHENOL OR P-HYDROXYACETANILIDE OR PARACETAMOL OR ACETAMIDOPHENOL OR ACEPHEN OR TYLENOL OR ANACIN\* OR PANADOL OR ACAMOL OR ACETAMINOPHEN):TI,AB,KW (WORD VARIATIONS HAVE BEEN SEARCHED)

#23 MESH DESCRIPTOR: [GLUCOSAMINE] EXPLODE ALL TREES

#24 (GLUCOSAMIDE OR D GLUCOSE AMINE OR GLUCOSE AMINE OR NSC 758 OR 2-AMINO-2-DEOXYGLUCOSE OR 2 AMINO 2 DEOXYGLUCOSE OR DONA OR DONA S OR GLUCOSAMINE OR 2-AMINO-2-DEOXYGLUCOSE OR 2 AMINO 2 DEOXYGLUCOSE OR DONA OR DONA S):TI,AB,KW (WORD VARIATIONS HAVE BEEN SEARCHED)

#25 MESH DESCRIPTOR: [CHONDROITIN] EXPLODE ALL TREES

#26 CHONDROITIN:TI,AB,KW (WORD VARIATIONS HAVE BEEN SEARCHED)

#27 #25 OR #26

#28 MESH DESCRIPTOR: [ANALGESICS, OPIOID] EXPLODE ALL TREES

#29 ('NARCOTIC ANALGESIC AGENT' OR 'NARCOTIC AGONIST ANTAGONIST' OR 'NARCOTIC ANALGESIC' OR 'NARCOTIC ANALGESICS' OR 'NARCOTIC ANALGETIC AGENT' OR ACETORPHINE OR ACETYLCODEINE OR ACETYLMETHADOL OR ALPHAPRODINE OR ANILERIDINE OR APADOLINE OR AZIDOMORPHINE OR BENZHYDROCODONE OR BEZITRAMIDE OR BREMAZOCINE OR 'BROMPTON MIXTURE' OR BUPRENORPHINE OR BUTORPHANOL OR CIRAMADOL OR COCODAMOL OR CODEINE OR PSEUDOEPHEDRINE OR CODYDRAMOL OR CONORFONE OR CYCLAZOCINE OR DEXTROMORAMIDE OR DEXTROPROPOXYPHENE OR DEXTRORPHAN OR DEZOCINE OR DIAMORPHINE OR DICONAL OR DIHYDROCODEINE OR DIHYDROETORPHINE OR DIHYDROMORPHINE OR DIMETHYLTHIAMBUTENE OR DIPIANONE OR ENADOLINE OR EPTAZOCINE OR ETHYLKETAZOCINE OR ETHYLMORPHINE OR



ETONITAZENE OR ETORPHINE OR ETOXERIDINE OR FAXELADOL OR FENTANYL OR FURETHIDINE OR GELONIDA OR HYDROCODONE OR HYDROMORPHONE OR ISALMADOL OR ISOMETHADONE OR KETAZOCINE OR KETOBEMIDONE OR KETOGAN OR KYOTORPHIN OR LEFETAMINE OR LEVACETYLMETHADOL OR LEVOMETHADONE OR LEVORPHANOL OR MEPTAZINOL OR METAZOCINE OR METHADONE OR METHYLSAMIDORPHAN OR MORPHINE OR 'MORPHINOMIMETIC AGENT' OR MORPHINONE OR NALBUPHINE OR NICOCODINE OR NICOMORPHINE OR NORACYMETHADOL OR NORBUPRENORPHINE OR NORDEXTROPROPOXYPHENE OR NORMORPHINE OR NORPETHIDINE OR NORPROPOXYPHENE OR 'O NORTRAMADOL' OR OLICERIDINE OR OPIATE OR ORIPAVINE OR OXYCODONE OR OXYMORPHONE OR PENTAMORPHONE OR PENTAZOCINE OR PETHIDINE OR PHENADOXONE OR PHENARIDINE OR PHENAZOCINE OR PHENCYCLIDINE OR PHENOPERIDINE OR PICENADOL OR PIMINODINE OR PIRITRAMIDE OR PROFADOL OR PROPIRAM OR SAMERIDINE OR SAMIDORPHAN OR SEMORPHONE OR TAPENTADOL OR THEBAINE OR TIFLUADOM OR TILIDINE OR TONAZOCINE OR TRIMEPERIDINE):TI,AB,KW (WORD VARIATIONS HAVE BEEN SEARCHED)

#30 #28 OR #29

#31 MESH DESCRIPTOR: [TRAMADOL] EXPLODE ALL TREES

#32 (TRAMADOL\* OR TRAMUNDIN OR DALGIC OR K-315 OR K 315 OR K315 OR NOBLIGAN OR ZYTRAM OR TIRAL OR TOPALGIC OR TRAMA ABZ OR TRAMA KD OR TRAMA DORSCH OR RANITIDIN 1A PHARMA OR TRAMA 1A PHARMA OR ULTRAM OR ZYDOL OR TRAMADOLOR OR TRAMAL OR ADOLONTA OR CONTRAMAL):TI,AB,KW (WORD VARIATIONS HAVE BEEN SEARCHED)

#33 #31 OR #32

#34 MESH DESCRIPTOR: [DULOXETINE HYDROCHLORIDE] EXPLODE ALL TREES

#35 (DULOXETINE OR LY 248686 OR LY-248686 OR CYMBALTA):TI,AB,KW (WORD VARIATIONS HAVE BEEN SEARCHED)

#36 #34 OR #35

#37 (NERVE GROWTH FACTOR ANTISERUM OR NGF ANTISERUM OR ANTISERUM NGF OR ANTI- NERVE GROWTH FACTOR\* OR TANEZUMABOR OR TANEZUMAB OR NERVE GROWTH FACTOR ANTIBOD\* OR ANTI-NGF OR FULRANUMABOR OR FULRANUMAB OR NERVE GROWTH FACTOR INHIBITOR\* OR NERVE GROWTH FACTOR ANTAGONIST\* OR NERVE GROWTH FACTOR BLOCKER\* OR NGF INHIBITOR\* OR NGF ANTAGONIST\* OR NGF BLOCKER\* OR NGF-AB OR FASINUMAB):TI,AB,KW (WORD VARIATIONS HAVE BEEN SEARCHED)

#38 MESH DESCRIPTOR: [CAPSAICIN] EXPLODE ALL TREES

#39 'CAPSAICIN OR CAPSAICINE OR AXSAIN OR ZOSTRIX OR CAPZASIN OR NGX-4010 OR NGX 4010 OR CAPSIN OR ADLEA OR ALGRX 4975 OR BIOZONE OR DECENOIC ACID OR QUTENZA':TI,AB,KW (WORD VARIATIONS HAVE BEEN SEARCHED)

#40 #38 OR #39

#41 'GAMMA-AMINOBUTYRIC ACID OR GAMMA AMINOBUTYRIC ACID\* OR GABA OR AMINALON\* OR GAMMALON OR HORIZANT OR GABAPENTIN OR CONVALIS OR NEURONTIN':TI,AB,KW (WORD VARIATIONS HAVE BEEN SEARCHED)

#42 MESH DESCRIPTOR: [INJECTIONS, INTRA-ARTICULAR] EXPLODE ALL TREES

#43 'JOINT INJECTION\* OR INTRAARTICULAR\* OR INTRA-ARTICULAR\* OR INTRA ARTICULAR\*':TI,AB,KW (WORD VARIATIONS HAVE BEEN SEARCHED)

#44 MESH DESCRIPTOR: [DIATHERMY] EXPLODE ALL TREES

#45 MESH DESCRIPTOR: [HYPERTHERMIA, INDUCED] EXPLODE ALL TREES

#46 MESH DESCRIPTOR: [HOT TEMPERATURE] EXPLODE ALL TREES AND WITH QUALIFIER(S): [THERAPEUTIC USE - TU]

#47 'HEAT TREATMENT\* OR THERMAL THERAP\* OR DIATHERM\* OR HYPERTHERMIC THERAP\* OR HEAT THERAP\* OR THERAPEUTIC HEAT OR HEAT APPLICATION\* OR THERMOTHERAP\* OR LOCAL HEAT OR HOT PACK\* OR HEATING PAD\* OR DIATHERAP\* OR DIATHERMIA OR INDUCTOTHERMY':TI,AB,KW (WORD VARIATIONS HAVE BEEN SEARCHED)

#48 #44 OR #45 OR #46 OR #47

#49 'COLD BATH\* OR CRYOGENIC THERAP\* OR CRYOTHERM\* OR CRYO-TREATMENT\* OR CRYOTREATMENT\* OR COOLING THERAP\* OR COLD TREATMENT\* OR THERAPEUTIC COOLING OR CRYOTHERAP\* OR COLD THERAP\* OR HYPOTHERM\* OR ICE THERAP\* OR ICE PACK\*':TI,AB,KW (WORD VARIATIONS HAVE BEEN SEARCHED)

#50 #48 OR #49

#51 MESH DESCRIPTOR: [RESISTANCE TRAINING] EXPLODE ALL TREES

#52 MESH DESCRIPTOR: [MUSCLE STRENGTH] THIS TERM ONLY

#53 (MUSCLE STRENGTH OR RESISTANCE TRAINING OR STRENGTH TRAINING OR STRENGTHEN\*):TI,AB,KW (WORD VARIATIONS HAVE BEEN SEARCHED)

#54 #51 OR #52 OR #53

#55 (AEROBICS\* OR AEROBIC EXERCISE\* OR AEROBIC ACTIVIT\* OR AEROBIC THERAP\*):TI,AB,KW (WORD VARIATIONS HAVE BEEN SEARCHED)

#56 (NEUROMUSCULAR REEDUCATION OR NEURO-MUSCULAR REEDUCATION OR NEUROMUSCULAR RE-EDUCATION OR NEURO-MUSCULAR RE-EDUCATION OR NEMEX\* OR NEUROMUSCULAR TRAINING OR

NEURO-MUSCULAR TRAINING OR NEURO-MUSCULAR EXERCISE\* OR NEUROMUSCULAR EXERCIS\*):TI,AB,KW (WORD VARIATIONS HAVE BEEN SEARCHED)

#57 MESH DESCRIPTOR: [HYDROTHERAPY] EXPLODE ALL TREES

#58 (AQUATICS OR AQUATIC EXERCISE\* OR AQUATIC ACTIVIT\* OR HYDROTHERAP\* OR WHIRLPOOL BATH\* OR KNEIPP THERAP\* OR WATER IMMERSION THERAP\*):TI,AB,KW (WORD VARIATIONS HAVE BEEN SEARCHED)

#59 MESH DESCRIPTOR: [CIRCUIT-BASED EXERCISE] EXPLODE ALL TREES

#60 (BALANCE TRAINING OR BALANCE EXERCISE\* OR BALANCE RE-EDUCATION OR BALANCE REEDUCATION OR CIRCUIT-BASED EXERCISE\* OR CIRCUIT TRAINING):TI,AB,KW (WORD VARIATIONS HAVE BEEN SEARCHED)

#61 #60 OR #59

#62 #58 OR #57

#63 MESH DESCRIPTOR: [EXERCISE] EXPLODE ALL TREES

#64 MESH DESCRIPTOR: [EXERCISE THERAPY] EXPLODE ALL TREES

#65 EXERCISE\*

#66 #63 OR #64 OR #65

#67 MESH DESCRIPTOR: [WALKING] EXPLODE ALL TREES

#68 WALKING OR AMBULATION

#69 (#67 OR #68) AND DAILY

#70 MESH DESCRIPTOR: [SELF EFFICACY] EXPLODE ALL TREES

#71 MESH DESCRIPTOR: [PATIENT EDUCATION AS TOPIC] EXPLODE ALL TREES

#72 MESH DESCRIPTOR: [PATIENT COMPLIANCE] EXPLODE ALL TREES

#73 MESH DESCRIPTOR: [ADAPTATION, PSYCHOLOGICAL] THIS TERM ONLY

#74 MESH DESCRIPTOR: [SELF CARE] THIS TERM ONLY

#75 #70 OR #71 OR #72 OR #73 OR #74

#76 MESH DESCRIPTOR: [COGNITIVE THERAPY] EXPLODE ALL TREES

#77 'MINDFULNESS OR CBT-I OR COGNITIVE BEHAVIOR\* OR COGNITIVE BEHAVIOUR\* OR COGNITIVE THERAP\* OR CBT OR COGNITION THERAP\* OR COGNITIVE PSYCHOTHERAP\*':TI,AB,KW (WORD VARIATIONS HAVE BEEN SEARCHED)

#78 #76 OR #77

#79 MESH DESCRIPTOR: [WEIGHT LOSS] THIS TERM ONLY

#80 (WEIGHT DECREAS\* OR WEIGHT LOSING OR WEIGHT REDUC\* OR WEIGHT WATCHING OR WEIGHT LOSS\*):TI,AB,KW (WORD VARIATIONS HAVE BEEN SEARCHED)

#81 #80 OR #79

#82 MESH DESCRIPTOR: [ACUPUNCTURE THERAPY] EXPLODE ALL TREES

#83 MESH DESCRIPTOR: [ACUPUNCTURE] EXPLODE ALL TREES

#84 (ACUPUNCTURE OR PHARMACOPUNCTURE\* OR ACUPRESSURE):TI,AB,KW (WORD VARIATIONS HAVE BEEN SEARCHED)

#85 #83 OR #84

#86 MESH DESCRIPTOR: [MIND-BODY THERAPIES] EXPLODE ALL TREES

#87 (YOGA OR THERAPEUTIC TOUCH OR REIKI OR LAYING-ON-OF-HANDS OR TAI JI OR TAI-JI OR TAI CHI OR TAI JI QUAN OR TAIJI OR TAIJIQUAN OR T'AI CHI OR RELAXATION THERAP\* OR RELAXATION TECHNIQUE\* OR RELAXATION TECHNICS OR PSYCHOPHYSIOLOGY OR PHYSIOLOGICAL PSYCHOLOGY OR PHYSIOLOGIC PSYCHOLOGY OR PSYCHODRAMA OR PSYCHODRAMA\* OR DRAMA THERAP\* OR DRAMATHERAP\* OR ROLE PLAYING OR MENTAL HEALING OR MEDITATION OR LAUGHTER THERAP\* OR IMAGERY PSYCHOTHERAPY OR IMAGERY OR DIRECTED REVERIE THERAP\* OR IMAGERIES OR SUGGESTION OR AUTOSUGGESTION\* OR PROGRESSIVE RELAXATION\* OR PROGRESSIVE MUSCLE RELAXATION\* OR AUTOGENIC TRAINING OR HYPNOSIS OR HYPNOSI\* OR HYPNOTISM\* OR HYPNOTHERAP\* OR MESMERISM\* OR QI GONG OR CH'I KUNG OR BREATHING EXERCISES OR BREATHING EXERCISE\* OR QIGONG\* OR NEUROFEEDBACK\* OR ALPHA FEEDBACK\* OR ELECTROMYOGRAPHY FEEDBACK\* OR EEG FEEDBACK\* OR BRAINWAVE FEEDBACK\* OR AROMATHERAPY OR BIOFEEDBACK\* OR PSYCHOLOGICAL FEEDBACK\* OR MYOFEEDBACK\* OR PHYSIOLOGICAL FEEDBACK\* OR MIND-BODY THERAPIES OR MIND-BODY OR MIND BODY):TI,AB,KW (WORD VARIATIONS HAVE BEEN SEARCHED)

#88 #86 OR #87

#89 MESH DESCRIPTOR: [CANES] EXPLODE ALL TREES

#90 'CANE OR CANES OR WALKING STICK\*':TI,AB,KW (WORD VARIATIONS HAVE BEEN SEARCHED)

#91 MESH DESCRIPTOR: [TRANSCUTANEOUS ELECTRIC NERVE STIMULATION] EXPLODE ALL TREES

#92 (TRANSCUTANEOUS ELECTRIC NERVE STIMULATION OR TRANSCUTANEOUS ELECTRICAL NERVE STIMULATION OR ELECTROSTIMULATION\* OR ELECTROANALGESIA OR PERCUTANEOUS ELECTRIC NERVE STIMULATION\* OR TENS OR TRANSCUTANEOUS ELECTRICAL STIMULATION\* OR TRANSDERMAL ELECTROSTIMULATION\* OR PERCUTANEOUS ELECTRICAL NERVE STIMULATION\* OR TRANSCUTANEOUS ELECTRICAL NERVE STIMULATION\* OR TRANSCUTANEOUS ELECTRIC STIMULATION\* OR TRANSCUTANEOUS NERVE STIMULATION\* OR ANALGESIC CUTANEOUS ELECTROSTIMULATION\* OR ELECTROANALGESIA\* OR TRANSCUTANEOUS ELECTRIC NERVE STIMULATION OR TRANSCUTANEOUS ELECTROSTIMULATION):TI,AB,KW (WORD VARIATIONS HAVE BEEN SEARCHED)

#93 #91 OR #92

#94 MESH DESCRIPTOR: [PULSED RADIOFREQUENCY TREATMENT] EXPLODE ALL TREES

#95 MESH DESCRIPTOR: [ELECTRIC STIMULATION THERAPY] EXPLODE ALL TREES

#96 MESH DESCRIPTOR: [VIBRATION] EXPLODE ALL TREES AND WITH QUALIFIER(S): [THERAPEUTIC USE - TU]

#97 (PULSED RADIOFREQUENCY TREATMENT\* OR PULSED RADIO FREQUENCY TREATMENT\* OR ELECTRIC STIMULATION THERAPY OR ELECTROTHERAP\* OR ELECTRIC STIMULATION\* OR ELECTRICAL STIMULATION\* OR WHOLE BODY VIBRATION\* OR WBV OR VIBRATION TRAINING OR ELECTROPHYSICAL THERAP\* OR PULSED VIBRATION THERAP\*):TI,AB,KW (WORD VARIATIONS HAVE BEEN SEARCHED)

#98 #94 OR #95 OR #96 OR #97

#99 MESH DESCRIPTOR: [MASSAGE] EXPLODE ALL TREES

#100 (MASSAGE\* OR ZONE THERAP\* OR REFLEXOLOG\* OR ROLFING OR BODYWORK\*):TI,AB,KW (WORD VARIATIONS HAVE BEEN SEARCHED)

#101 #99 OR #100

#102 MESH DESCRIPTOR: [ACUPRESSURE] EXPLODE ALL TREES

#103 MESH DESCRIPTOR: [THERAPY, SOFT TISSUE] EXPLODE ALL TREES

#104 MESH DESCRIPTOR: [MANIPULATION, OSTEOPATHIC] EXPLODE ALL TREES

#105 MESH DESCRIPTOR: [MANIPULATION, CHIROPRACTIC] EXPLODE ALL TREES

#106 MESH DESCRIPTOR: [MUSCULOSKELETAL MANIPULATIONS] EXPLODE ALL TREES

#107 (OSTEOPATH\* OR ORTHOP\* OR SPINE OR SPINAL) AND (MANIPULAT\*):TI,AB,KW (WORD VARIATIONS HAVE BEEN SEARCHED)

#108 (ACUPRESSURE OR SHIATSU OR ZHI YA OR CHIH YA OR SOFT TISSUE THERAP\* OR CHIROPRACTIC\* OR APPLIED KINESIOLOG\* OR MUSCULOSKELETAL MANIPULATION\* OR MANUAL

THERAP\* OR MANIPULATION THERAP\* OR MANIPULATIVE THERAP\*):TI,AB,KW (WORD VARIATIONS HAVE BEEN SEARCHED)

#109 #102 OR #103 OR #104 OR #105 OR #106 OR #107 OR #108

#110 (PROLOTHERAP\* OR PROLIFERATIVE THERAP\*):TI,AB,KW (WORD VARIATIONS HAVE BEEN SEARCHED)

#111 MESH DESCRIPTOR: [GLUCOSE SOLUTION, HYPERTONIC] EXPLODE ALL TREES

#112 MESH DESCRIPTOR: [HYPERTONIC SOLUTIONS] EXPLODE ALL TREES

#113 #112 AND DEXTROSE\*

#114 MESH DESCRIPTOR: [MESENCHYMAL STROMAL CELLS] EXPLODE ALL TREES

#115 MESH DESCRIPTOR: [PLATELET-RICH PLASMA] EXPLODE ALL TREES

#116 MESH DESCRIPTOR: [ANESTHETICS] EXPLODE ALL TREES

#117 MESH DESCRIPTOR: [SALINE SOLUTION, HYPERTONIC] EXPLODE ALL TREES

#118 MESH DESCRIPTOR: [BOTULINUM TOXINS] EXPLODE ALL TREES

#119 (ANESTHETIC\* OR ANAESTHETI\* OR SALINE\* OR SODIUM CHLORIDE SOLUTION\* OR "BONT/A" OR BOTULINIUM TOXIN OR BOTULINUM NEUROTOXIN OR BOTULINUS TOXIN OR BOTULISM TOXIN OR CLOSTRIDIUM BOTULINUM EXOTOXIN OR BOTULINUM TOXINS OR BOTULINUM TOXIN\* OR BOTULIN OR HYPERTONIC DEXTROSE\* OR HYPERTONIC GLUCOSE SOLUTION\* OR GLUCOSE HYPERTONIC SOLUTION\* OR MESENCHYMAL STROMAL CELL\* OR MESENCHYMAL STEM CELL\* OR MESENCHYMAL PROGENITOR CELL\* OR MULTIPOTENT BONE MARROW STROMAL CELL\* OR BONE MARROW STROMAL CELL\* OR WHARTON JELLY CELL\* OR WHARTON'S JELLY CELL\* OR WHARTONS JELLY CELL\* OR MSC OR THROMBOCYTE RICH PLASMA\* OR THROMBOCYTE-RICH PLASMA\* OR PLATELET-RICH PLASMA OR PRP OR PLATELET RICH PLASMA):TI,AB,KW (WORD VARIATIONS HAVE BEEN SEARCHED)

#120 (#42 OR #43) AND (#111 OR #113 OR #114 OR #115 OR #116 OR #117 OR #118 OR #119)

#121 #120 OR #110

#122 MESH DESCRIPTOR: [DIPHOSPHONATES] EXPLODE ALL TREES

#123 MESH DESCRIPTOR: [TECHNETIUM TC 99M MEDRONATE] EXPLODE ALL TREES

#124 MESH DESCRIPTOR: [RISEDRONATE SODIUM] EXPLODE ALL TREES

#125 MESH DESCRIPTOR: [ETIDRONIC ACID] EXPLODE ALL TREES

#126 'TECHNETIUM TC 99M MEDRONATE OR MEDRONATE OR 99MTC-MDP OR TECHNETIUM TC 99M METHYLENEDIPHOSPHONATE OR TC-99M MDP OR RISEDRONATE SODIUM OR RISEDRONATE OR

RISEDRONIC ACID OR ACTONEL OR ATELVIA OR ETHANEHYDROXYDIPHOSPHONATE OR HEDSPA OR XIDIFON OR XYDIPHONE OR XIDIPHON OR DIDRONEL OR ETIDRONIC ACID\* OR ETIDRONATE\* OR EHDP OR ETHANEHYDROXYDIPHOSPHONATE OR HEDSPA OR XIDIFON OR XYDIPHONE OR XIDIPHON OR DIDRONEL OR CLODRONIC ACID OR DICHLOROMETHYLENEBISPHOSPHONATE\* OR DICHLOROMETHANEDIPHOSPHONATE OR CLODRONATE OR BONEFOS OR ALENDRONATE OR FOSAMAX OR MK-217 OR MK 217 OR DIPHOSPHONIC ACID DERIVATIVE\* OR BIPHOSPHONATE\* OR BISPHOSPHONIC ACID DERIVATIVE\* OR DIPHOSPHONATES OR DIPHOSPHONATE\* OR BISPHOSPHONATE\*:TI,AB,KW (WORD VARIATIONS HAVE BEEN SEARCHED)

#127 #126 OR #125 OR #124 OR #123 OR #122

#128 MESH DESCRIPTOR: [VENLAFAXINE HYDROCHLORIDE] EXPLODE ALL TREES

#129 MESH DESCRIPTOR: [DESVENLAFAXINE SUCCINATE] EXPLODE ALL TREES

#130 FETZIMA OR PRISTIQ OR VENLAFAXINE HYDROCHLORIDE OR VENLAFAXINE OR EFFEXOR OR TREVILOR OR VANDRAL OR EFEXOR OR DOBUPAL OR SIBUTRAMINE OR REDUCTIL OR MERIDIA OR MILNACIPRAN OR MIDALCIPRAN OR LEVOMILNACIPRAN OR SAVELLA OR DESVENLAFAXINE OR CLOMIPRAMINE OR MILNACIPRAN OR SIBUTRAMINE OR TRIPLE REUPTAKE INHIBITOR\* OR VENLAFAXINE OR HYDIPHEN OR ANAFRANIL OR DUAL MONOAMINE REUPTAKE INHIBITOR OR DUAL MONOAMINE UPTAKE INHIBITOR OR DUAL REUPTAKE INHIBITOR OR DUAL UPTAKE INHIBITOR OR NORADRENALIN SEROTONIN REUPTAKE INHIBITOR OR NORADRENALIN SEROTONIN UPTAKE INHIBITOR OR NOREPINEPHRINE SEROTONIN REUPTAKE INHIBITOR OR NOREPINEPHRINE SEROTONIN UPTAKE INHIBITOR OR SELECTIVE SEROTONIN NORADRENALIN REUPTAKE INHIBITOR OR "SEROTONIN AND NORADRENALINE REUPTAKE INHIBITOR" OR "SEROTONIN AND NORADRENALINE UPTAKE INHIBITOR" OR "SEROTONIN AND NOREPINEPHRINE REUPTAKE INHIBITOR" OR "SEROTONIN AND NOREPINEPHRINE UPTAKE INHIBITOR" OR SEROTONIN NORADRENALIN UPTAKE INHIBITOR OR SEROTONIN NOREPINEPHRINE REUPTAKE INHIBITOR OR SEROTONIN NOREPINEPHRINE UPTAKE INHIBITOR OR SNRI OR SNRIS OR SSNRI OR SNRI\* OR "SEROTONIN AND NORADRENALINE REUPTAKE INHIBITOR" OR DUAL MONOAMINE REUPTAKE INHIBITOR OR DUAL MONOAMINE UPTAKE INHIBITOR OR DUAL REUPTAKE INHIBITOR OR DUAL UPTAKE INHIBITOR OR NORADRENALIN SEROTONIN REUPTAKE INHIBITOR OR NORADRENALIN SEROTONIN UPTAKE INHIBITOR OR NOREPINEPHRINE SEROTONIN REUPTAKE INHIBITOR OR NOREPINEPHRINE SEROTONIN UPTAKE INHIBITOR OR SELECTIVE SEROTONIN NORADRENALIN REUPTAKE INHIBITOR OR "SEROTONIN AND NORADRENALINE REUPTAKE INHIBITOR" OR "SEROTONIN AND NORADRENALINE UPTAKE INHIBITOR" OR "SEROTONIN AND NORADRENALINE UPTAKE INHIBITOR" OR "SEROTONIN AND NOREPINEPHRINE REUPTAKE INHIBITOR" OR "SEROTONIN AND NOREPINEPHRINE UPTAKE INHIBITOR" OR SEROTONIN NORADRENALIN UPTAKE INHIBITOR OR SEROTONIN NOREPINEPHRINE REUPTAKE INHIBITOR OR SEROTONIN NOREPINEPHRINE UPTAKE INHIBITOR OR SNRI OR SNRIS OR SSNRI OR SNRI\* OR "SEROTONIN AND NORADRENALINE REUPTAKE INHIBITOR":TI,AB,KW (WORD VARIATIONS HAVE BEEN SEARCHED)

#131 #130 OR #129 OR #128

#132 MESH DESCRIPTOR: [ANTIDEPRESSIVE AGENTS, TRICYCLIC] EXPLODE ALL TREES

#133 (2-HYDROXYDESIPRAMINE OR AMINEPTIN OR AMITRIPTYLINE OR CLOMIPRAMINE OR CYCLOBENZAPRINE OR DESIPRAMINE OR DESMETHYLDOPIN OR DIBENZEPIN OR DOTHIEPIN OR DOXEPIN OR IMIPRAMINE OR IPRINDOLE OR LOFEPRAMINE OR MELITRACENE OR METAPRAMINE OR MIRTAZAPINE OR NORTRIPTYLINE OR NOXIPTILIN OR OPIPRAMOL OR PROTRIPTYLINE OR TIANEPTINE OR TRIMIPRAMINE OR TRICYCLIC ANTIDEPRESSANT\* OR TRICYCLIC ANTIDEPRESSIVE\*):TI,AB,KW (WORD VARIATIONS HAVE BEEN SEARCHED)

#134 #132 OR #133

#135 MESH DESCRIPTOR: [PREGABALIN] EXPLODE ALL TREES

#136 (PREGABALIN OR LYRICA):TI,AB,KW (WORD VARIATIONS HAVE BEEN SEARCHED)

#137 #135 OR #136

#138 MESH DESCRIPTOR: [METHOTREXATE] EXPLODE ALL TREES

#139 (METHOTREXATE\* OR AMETHOPTERIN\* OR MEXATE OR METHYLPTEROYLGLUTAMIC ACID OR A METHOPTERINE OR AMETOPTERINE\* OR CL 14377 OR EMTHEXAT OR EMTREXATE OR FOLEX OR LEDERTREXATE OR METEX OR METHROTREXATE OR METHYLAMINOPTERIN OR METOJECT OR METOTHREXATE OR METOTREXAT OR METOTREXATE OR METREX OR MPI 5004 OR MTX OR NEOTREXATE OR NSC 740 OR OTREXUP OR RHEUMATREX OR TEXATE OR TREXALL):TI,AB,KW (WORD VARIATIONS HAVE BEEN SEARCHED)

#140 #138 OR #139

#141 MESH DESCRIPTOR: [COLCHICINE] EXPLODE ALL TREES

#142 (LUMICOLCHICINES OR DEMECOLCINE OR COLCHAMINE OR COLCEMIDE OR COLCEMID OR COLCHICINE):TI,AB,KW (WORD VARIATIONS HAVE BEEN SEARCHED)

#143 #141 OR #142

#144 MESH DESCRIPTOR: [VITAMIN D] EXPLODE ALL TREES

#145 (DIHYDROTACHYSTEROL OR TACHYSTIN OR DIHYDROTACHYSTERIN OR CALCAMINE OR ERCALCIDIOL OR VITAMIN D2 OR VITAMIN D3 OR ERGOCALCIFEROL\* OR CALCIFEROLS OR HYDROXYCHOLECALCIFEROLS OR HYDROXYVITAMINS D OR HYDROXYCHOLECALCIFEROL OR CHOLECALCIFEROL OR CALCIOL OR CHOLECALCIFEROLS OR VITAMIN D OR CALCITRIOL OR DIHYDROXYCHOLECALCIFEROL OR "24,25-DIHYDROXY VITAMIN D3"):TI,AB,KW (WORD VARIATIONS HAVE BEEN SEARCHED)

#146 #144 OR #145

#147 MESH DESCRIPTOR: [FISH OILS] EXPLODE ALL TREES



#148 (EICOSAPENTAENOIC ACID OR EICOSAPENTANOIC ACID\* OR TIMNODONIC ACID OR DOCOSAHEXAENOIC ACID\* OR DOCOSAHEXAENOATE OR DOCOSAHEXAENOIC ACID\* OR OMEGA-3 FATTY ACID\* OR N3 FATTY ACID\* OR N3 PUFA OR N3 POLYUNSATURATED FATTY ACID\* OR N3 OILS OR N-3 PUFA OR N-3 FATTY ACID\* OR N 3 FATTY ACID\* OR N-3 POLYUNSATURATED FATTY ACID\* OR N 3 POLYUNSATURATED FATTY ACID\* OR OMEGA 3 FATTY ACID\* OR N-3 OILS OR N 3 OILS OR COD LIVER OIL OR FISH OILS OR FISH OIL\* OR FISH LIVER OIL\*):TI,AB,KW (WORD VARIATIONS HAVE BEEN SEARCHED)

#149 #147 OR #148

#150 MESH DESCRIPTOR: [TUMOR NECROSIS FACTOR-ALPHA] EXPLODE ALL TREES AND WITH QUALIFIER(S): [ANTAGONISTS & INHIBITORS - AI]

#151 MESH DESCRIPTOR: [CERTOLIZUMAB PEGOL] EXPLODE ALL TREES

#152 MESH DESCRIPTOR: [INFLIXIMAB] EXPLODE ALL TREES

#153 MESH DESCRIPTOR: [ETANERCEPT] EXPLODE ALL TREES

#154 MESH DESCRIPTOR: [ADALIMUMAB] EXPLODE ALL TREES

#155 (INFLIXIMAB OR MAB CA2 OR MONOCLONAL ANTIBODY CA2 OR REMICADE OR ETANERCEPT\* OR TNF RECEPTOR TYPE II-IGG FUSION PROTEIN\* OR TNF RECEPTOR TYPE II IGG FUSION PROTEIN\* OR ENBREL OR TNFR-FC FUSION PROTEIN\* OR TNFR FC FUSION PROTEIN\* OR TNR-001 OR TNR 001 OR TNT RECEPTOR FUSION PROTEIN\* OR ADALIMUMAB\* OR D2E7 ANTIBOD\* OR HUMIRA OR CERTOLIZUMAB PEGOL OR CERTOLIZUMAB OR CIMZIA\* OR CDP 870\* OR GOLIMUMAB OR SIMPONI OR ANTI TUMOR NECROSIS FACTOR AGENT\* OR ANTI TUMOUR NECROSIS FACTOR AGENT\* OR TNF ALPHA INHIBITOR\* OR TNF INHIBITOR\* OR TUMOUR NECROSIS FACTOR ALPHA INHIBITOR\* OR TUMOUR NECROSIS FACTOR INHIBITOR\* OR ANTI-TNF ALPHA AGENT\* OR ANTI TNF ALPHA AGENT\* OR ANTI TNF AGENT\* OR ANTI-TNF AGENT\* OR TUMOR NECROSIS FACTOR INHIBITOR\* OR TUMOR NECROSIS FACTOR ALPHA INHIBITOR\* OR TNF-ALPHA INHIBITOR\* OR CACHECTIN INHIBITOR\* OR TNF BLOCKER\* OR TNF ALPHA BLOCKER\* OR TUMOR NECROSIS FACTOR ALPHA BLOCKER\* OR TUMOUR NECROSIS FACTOR ALPHA BLOCKER\* OR TUMOR NECROSIS FACTOR BLOCKER\* OR TUMOUR NECROSIS FACTOR BLOCKER\* OR INFLECTRA OR INFLIXIMAB-DYYB):TI,AB,KW (WORD VARIATIONS HAVE BEEN SEARCHED)

#156 #150 OR #151 OR #152 OR #153 OR #154 OR #155

#157 MESH DESCRIPTOR: [INTERLEUKIN 1 RECEPTOR ANTAGONIST PROTEIN] EXPLODE ALL TREES

#158 MESH DESCRIPTOR: [INTERLEUKIN-1] EXPLODE ALL TREES AND WITH QUALIFIER(S): [ANTAGONISTS & INHIBITORS - AI]

#159 ("INTERLEUKIN 1 RECEPTOR ANTAGONIST PROTEIN" OR IL 1 FEBRILE INHIBITOR\* OR KINERET OR ANAKINRA OR ANTRIL OR IL1 FEBRILE INHIBITOR\* OR IL-1RA OR ANTI-IL-1 OR ANTI-INTERLEUKIN-1 OR IL-1 INHIBITOR\* OR IL-1 ANTAGONIST\* OR INTERLEUKIN 1 INHIBITOR\* OR INTERLEUKIN 1 ANTAGONIST\*

OR ANTI-IL-1 OR ANTI-INTERLEUKIN-1 IL-1 INHIBITOR\* OR IL-1 ANTAGONIST\* OR INTERLEUKIN 1 INHIBITOR\* OR INTERLEUKIN 1 ANTAGONIST\*):TI,AB,KW (WORD VARIATIONS HAVE BEEN SEARCHED)

#160 #157 OR #158 OR #159

#161 MESH DESCRIPTOR: [CATHETER ABLATION] EXPLODE ALL TREES

#162 (RADIOFREQUENCY ABLATION\* OR CATHETER ABLATION\* OR TRANSVENOUS ELECTRIC ABLATION\* OR TRANSVENOUS ELECTRICAL ABLATION\*):TI,AB,KW (WORD VARIATIONS HAVE BEEN SEARCHED)

#163 #161 OR #162

#164 MESH DESCRIPTOR: [LIDOCAINE] EXPLODE ALL TREES

#165 (LIDOCAINE OR LIGNOCAINE OR OCTOCAINE OR XYLOCAINE OR XYLOCITIN):TI,AB,KW (WORD VARIATIONS HAVE BEEN SEARCHED)

#166 #164 OR #165

#167 MESH DESCRIPTOR: [ADMINISTRATION, TOPICAL] THIS TERM ONLY

#168 TOPICAL\*:TI,AB,KW (WORD VARIATIONS HAVE BEEN SEARCHED)

#169 #166 AND (#167 OR #168)

#170 MESH DESCRIPTOR: [BETAMETHASONE] EXPLODE ALL TREES

#171 MESH DESCRIPTOR: [TRIAMCINOLONE ACETONIDE] EXPLODE ALL TREES

#172 MESH DESCRIPTOR: [ADRENAL CORTEX HORMONES] EXPLODE ALL TREES

#173 MESH DESCRIPTOR: [DEXAMETHASONE] EXPLODE ALL TREES

#174 (DEXASONE OR MAXIDEX OR MILLICORTEN OR ORADEXON OR HEXADROL OR BETAMETHASONE OR CELESTONA OR CELESTON OR CELESTONE OR TRIAMCINOLONE OR TRICORT-40 OR TRICORT 40 OR KENALOG OR AZMACORT OR KENACORT OR METHYLPREDNISOLONE OR DEPO-MEDROL OR DEPO-MEDRONE OR ADRENOCORTICAL HORMONE\* OR ADRENAL CORTEX HORMONE\* OR CORTICOSTEROID\* OR CORTICOID\*):TI,AB,KW (WORD VARIATIONS HAVE BEEN SEARCHED)

#175 #174 OR #173 OR #172 OR #171 OR #170

#176 MESH DESCRIPTOR: [HYALURONIC ACID] EXPLODE ALL TREES

#177 (ADANT OR AMVISC PLUS OR ARTHREASE OR ARTZ OR BIONECT OR DUOVISC OR DUROLANE OR EYECON OR HEALON YELLOW OR HEALON5 OR HEALONID OR HIALID OR HYALCON OR HYALEIN OR HYALGAN OR HYALOVET OR HYALUBRIX OR HYALURONATE OR HYLAFORM OR HYLAN G F 20 OR HYLAN G-F 20 OR HYLARTIN V OR HYLO-COMOD OR HYRUAN OR IALUGEN OR JUVEDERM OR LAGRICEL OFTEN0

OR LASERVIS OR ME 3710 OR MONOVISC OR NA HYLAN OR NA-HYLAN OR NRD 101 OR NRD101 OR OPTHALIN OR ORTHOVISC OR OSTENIL OR PERLANE OR POTASSIUM HYALURONATE OR PROVISC OR RADIAPLEXRX OR RESTYLANE OR SI 4402 OR SINOVIOL OR SL 1010 OR SODIUM HYALURONATE OR SPERM SELECT OR SUPARTZ OR SUPLASYN OR SYNOCROM OR SYNVISC OR TEOSYAL OR VISCOSEAL OR VISMED OR VITRAX OR HYALURONIC ACID\* OR AMO VITRAX OR BIOLON OR HYALURONAN OR HYVISC OR LURONIT OR AMVISC OR HEALON):TI,AB,KW (WORD VARIATIONS HAVE BEEN SEARCHED)

#178 #176 OR #177

#179 #17 AND (#20 OR #22 OR #24 OR #28 OR #30 OR #33 OR #36 OR #37 OR #41 OR #48 OR #50 OR #54 OR #55 OR #56 OR #62 OR #61 OR #69 OR #66 OR #75 OR #78 OR #81 OR #85 OR #88 OR #90 OR #93 OR #98 OR #101 OR #109 OR #121 OR #127 OR #131 OR #134 OR #137 OR #140 OR #143 OR #146 OR #149 OR #156 OR #160) IN TRIALS

#180 #17 AND #43 AND (#175 OR #178)

#181 #180 OR #179 IN TRIALS

## **2. HAND OR PFOA**

#1 MESH DESCRIPTOR: [OSTEOARTHRITIS] THIS TERM ONLY

#2 OSTEOARTHRI\* OR OSTEOARTHRO\* OR DEGENERATIVE ARTHRIT\* OR DEGENERATIVE JOINT DISEASE\* OR NONINFLAMMATORY ARTHRIT\* OR NON-INFLAMMATORY ARTHRIT\* OR ARTHROSIS OR ARTHROSES OR OSTEO-ARTHRI\* OR OSTEO-ARTHROS\*

#3 MESH DESCRIPTOR: [ANTI-INFLAMMATORY AGENTS, NON-STEROIDAL] EXPLODE ALL TREES

#4 (NONSTEROIDAL ANTIINFLAMMATORY AGENT\* OR NONSTEROIDAL ANTI INFLAMMATORY AGENT\* OR NON-STEROIDAL ANTI-INFLAMMATORY AGENT\* OR NON STEROIDAL ANTI INFLAMMATORY AGENT\* OR ASPIRIN-LIKE AGENT\* OR ANTI-INFLAMMATORY ANALGESIC\* OR NON-STEROIDAL ANTI-RHEUMATIC AGENT\* OR NON-STEROIDAL ANTIRHEUMATIC AGENT\* OR NSAID\* OR A 771726 OR ACECLOFENAC OR ACETMETACIN OR ACETOSYRINGONE OR ACETOVANILLONE OR ACETYLSALICYLIC ACID LYSINATE OR ADAPALENE OR ALCLOFENAC OR ALMINOPROFEN OR AMIPRILOSE OR AMPYRONE OR ANDROGRAPHOLIDE OR ANISODAMINE OR ANISODINE OR ANTIFLAMMIN P2 OR ANTIPYRINE OR APAZONE OR APREMILAST OR ARTEPARON OR ARTHROTEC OR ASPIRIN OR ATRINOSITOL OR AZULENE OR BAICALIN OR BALSALAZIDE OR BENDAZAC OR BENORILATE OR BENOXAPROFEN OR BENZOBARBITAL OR BERBAMINE OR BETULINIC ACID OR BEVONIUM OR BIPHENYLYLACETIC ACID OR BOLDINE OR BREDININ OR BROMFENAC OR BUCILLAMINE OR BUFXAMAC OR BUMADIZONE OR BUTIBUFEN OR CARBASPIRIN CALCIUM OR CARBON FIBER OR CARPROFEN OR CARYOPHYLLENE OR CASTANOSPERMINE OR CDP 571 OR CELECOXIB OR CEPHARANTHINE OR CHLOROQUINE DIPHOSPHATE OR CHOLINE MAGNESIUM TRISALICYLATE OR CHRYSAROBIN OR CLONIXIN OR CP 96345 OR CURCUMIN OR DAURICINE OR DEXKETOPROFEN TROMETAMOL OR DICLOFENAC OR DICLOFENAC HYDROXYETHYLPYRROLIDINE OR DIFENPIRAMIDE OR DIFLUNISAL OR DIMEPHOSPHON OR DIPYRONE OR DIUCIFON OR DROXICAM OR DUP 697 OR EBSELEN OR EFAMOL OR ELTENAC OR ENFENAMIC ACID OR

EPIRIZOLE OR ETANERCEPT OR ETHENZAMIDE OR ETHONIUM OR ETODOLAC OR ETOFENAMATE OR ETORICOXIB OR FENAMIC ACID OR FENBUFEN OR FENCLOFENAC OR FENFLUMIZOLE OR FENOPROFEN OR FENTIAZAC OR FEPRADINOL OR FEPRAZONE OR FERULIC ACID OR FLOCTAFENINE OR FLOSULIDE OR FLUNIXIN OR FLUNIXIN MEGLUMINE OR FLUNOXAPROFEN OR FLUPROQUAZONE OR FLURBIPROFEN OR FLURBIPROFEN AXETIL OR FR 167653 OR FR 173657 OR GLUCAMETACIN OR GUACETISAL OR HELENALIN OR HELIODERMIN OR HEMODES OR HIGENAMINE OR IBUPROFEN OR IBUPROXAM OR ICATIBANT OR IH 764-3 OR IMIDAZOLE-2-HYDROXYBENZOATE OR INDOBUFEN OR INDOMETHACIN OR INDOPROFEN OR IODOANTIPYRINE OR ISOXICAM OR KEBUZONE OR KETOPROFEN OR KETOPROFEN LYSINE OR KETOROLAC OR L 745337 OR L 778736 OR LIPOXIN A4 OR LIPOXIN B4 OR LISOFYLLINE OR LOBENZARIT OR LONAZOLAC OR LORNOXICAM OR LOXOPROFEN OR LUMIRACOXIB OR MAGNESIUM SALICYLATE OR MAGNOLOL OR MANOALIDE OR MASOPROCOL OR MECLOFENAMIC ACID\* OR MEFENAMIC ACID\* OR MELOXICAM OR MESALAMINE OR MOFEBUTAZONE OR MOFEZOLAC OR NABUMETONE OR NAFAMOSTAT OR NAPROXEN OR NEBACETIN OR NEPAFENAC OR NIFENAZONE OR NIFLUMIC ACID OR NIMESULIDE OR NITROASPIRIN OR OLOPATADINE HYDROCHLORIDE OR OLSALAZINE OR OLVANIL OR OREN GEDOKU TO OR ORGOTEIN OR OXAPROZIN OR OXYPHENBUTAZONE OR PALMIDROL OR PARECOXIB OR PARTHENOLIDE OR PEONIFLORIN OR PHENIDONE OR PHENYL BUTAZONE OR PIMECROLIMUS OR PIRFENIDONE OR PIROXICAM OR PIROXICAM-BETA-CYCLODEXTRIN OR PIRPROFEN OR PROGLUMETACIN OR PROPACETAMOL OR PROPIONYL CARNITINE OR PROPYPHENAZONE OR PROQUAZONE OR PYRANOPROFEN OR PYRAZOLONE OR PYROGENAL OR RESVERATROL OR ROFECOXIB OR ROSMARINIC ACID OR RUMALON OR SAIKO-KEISHI-TO OR SAIKOSAPONIN OR SALICIN OR SALICYLAMIDE OR SALICYLATES OR SALICYLSALICYLIC ACID OR SB 203580 OR SC 299 OR SC 41930 OR SC 560 OR SEMAPIMOD OR SERATRODAST OR SERRATIOPEPTIDASE OR SHIKONIN OR SINAPALDEHYDE OR SODIUM SALICYLATE\* OR ST 679 OR SULFASALAZINE OR SULINDAC OR SULINDAC SULFIDE OR SULINDAC SULFONE OR SUPROFEN OR SUXIBUZONE OR TANSHINONE OR TAXIFOLIN OR TENIDAP OR TENOXICAM OR TEPOXALIN OR TIAPROFENIC ACID OR TIARAMIDE OR TINORIDINE OR TOLFENAMIC ACID OR TOLMETIN OR TRANILAST OR TRIBENOSIDE OR URSOLIC ACID OR VALDECOXIB OR ZILEUTON OR ZOMEPIRAC):TI,AB,KW (WORD VARIATIONS HAVE BEEN SEARCHED)

#5 #3 OR #4

#6 MESH DESCRIPTOR: [ACETAMINOPHEN] EXPLODE ALL TREES

#7 (HYDROXYACETANILIDE OR APAP OR P-ACETAMIDOPHENOL OR P-HYDROXYACETANILIDE OR PARACETAMOL OR ACETAMIDOPHENOL OR ACEPHEN OR TYLENOL OR ANACIN\* OR PANADOL OR ACAMOL OR ACETAMINOPHEN):TI,AB,KW (WORD VARIATIONS HAVE BEEN SEARCHED)

#8 MESH DESCRIPTOR: [GLUCOSAMINE] EXPLODE ALL TREES

#9 (GLUCOSAMIDE OR D GLUCOSE AMINE OR GLUCOSE AMINE OR NSC 758 OR 2-AMINO-2-DEOXYGLUCOSE OR 2 AMINO 2 DEOXYGLUCOSE OR DONA OR DONA S OR GLUCOSAMINE OR 2-AMINO-2-DEOXYGLUCOSE OR 2 AMINO 2 DEOXYGLUCOSE OR DONA OR DONA S):TI,AB,KW (WORD VARIATIONS HAVE BEEN SEARCHED)

#10 MESH DESCRIPTOR: [CHONDROITIN] EXPLODE ALL TREES

#11 CHONDROITIN:TI,AB,KW (WORD VARIATIONS HAVE BEEN SEARCHED)

#12 #10 OR #11

#13 MESH DESCRIPTOR: [ANALGESICS, OPIOID] EXPLODE ALL TREES

#14 ('NARCOTIC ANALGESIC AGENT' OR 'NARCOTIC AGONIST ANTAGONIST' OR 'NARCOTIC ANALGESIC' OR 'NARCOTIC ANALGESICS' OR 'NARCOTIC ANALGETIC AGENT' OR ACETORPHINE OR ACETYLCODEINE OR ACETYLMETHADOL OR ALPHAPRODINE OR ANILERIDINE OR APADOLINE OR AZIDOMORPHINE OR BENZHYDROCODONE OR BEZITRAMIDE OR BREMAZOCINE OR 'BROMPTON MIXTURE' OR BUPRENORPHINE OR BUTORPHANOL OR CIRAMADOL OR COCODAMOL OR CODEINE OR PSEUDOEPHEDRINE OR CODYDRAMOL OR CONORFONE OR CYCLAZOCINE OR DEXTROMORAMIDE OR DEXTROPROPOXYPHENE OR DEXTRORPHAN OR DEZOCINE OR DIAMORPHINE OR DICONAL OR DIHYDROCODEINE OR DIHYDROETORPHINE OR DIHYDROMORPHINE OR DIMETHYLTHIAMBUTENE OR DIPIANONE OR ENADOLINE OR EPTAZOCINE OR ETHYLKETAZOCINE OR ETHYLMORPHINE OR ETONITAZENE OR ETORPHINE OR ETOXERIDINE OR FAXELADOL OR FENTANYL OR FURETHIDINE OR GELONIDA OR HYDROCODONE OR HYDROMORPHONE OR ISALMADOL OR ISOMETHADONE OR KETAZOCINE OR KETOBEMIDONE OR KETOGAN OR KYOTORPHIN OR LEFETAMINE OR LEVACETYLMETHADOL OR LEVOMETHADONE OR LEVORPHANOL OR MEPTAZINOL OR METAZOCINE OR METHADONE OR METHYLSAMIDORPHAN OR MORPHINE OR 'MORPHINOMIMETIC AGENT' OR MORPHINONE OR NALBUPHINE OR NICOCODINE OR NICOMORPHINE OR NORACYMETHADOL OR NORBUPRENORPHINE OR NORDEXTROPROPOXYPHENE OR NORMORPHINE OR NORPETHIDINE OR NORPROPOXYPHENE OR 'O NORTRAMADOL' OR OLICERIDINE OR OPIATE OR ORIPAVINE OR OXYCODONE OR OXYMORPHONE OR PENTAMORPHONE OR PENTAZOCINE OR PETHIDINE OR PHENADOXONE OR PHENARIDINE OR PHENAZOCINE OR PHENCYCLIDINE OR PHENOPERIDINE OR PICENADOL OR PIMINODINE OR PIRITRAMIDE OR PROFADOL OR PROPIRAM OR SAMERIDINE OR SAMIDORPHAN OR SEMORPHONE OR TAPENTADOL OR THEBAINE OR TIFLUADOM OR TILIDINE OR TONAZOCINE OR TRIMEPERIDINE):TI,AB,KW (WORD VARIATIONS HAVE BEEN SEARCHED)

#15 #13 OR #14

#16 MESH DESCRIPTOR: [TRAMADOL] EXPLODE ALL TREES

#17 (TRAMADOL\* OR TRAMUNDIN OR DALGIC OR K-315 OR K 315 OR K315 OR NOBLIGAN OR ZYTRAM OR TIRAL OR TOPALGIC OR TRAMA ABZ OR TRAMA KD OR TRAMA DORSCH OR RANITIDIN 1A PHARMA OR TRAMA 1A PHARMA OR ULTRAM OR ZYDOL OR TRAMADOLOR OR TRAMAL OR ADOLONTA OR CONTRAMAL):TI,AB,KW (WORD VARIATIONS HAVE BEEN SEARCHED)

#18 #16 OR #17

#19 MESH DESCRIPTOR: [DULOXETINE HYDROCHLORIDE] EXPLODE ALL TREES

#20 (DULOXETINE OR LY 248686 OR LY-248686 OR CYMBALTA):TI,AB,KW (WORD VARIATIONS HAVE BEEN SEARCHED)

#21 #19 OR #20

#22 (NERVE GROWTH FACTOR ANTISERUM OR NGF ANTISERUM OR ANTISERUM NGF OR ANTI- NERVE GROWTH FACTOR\* OR TANEZUMABOR OR TANEZUMAB OR NERVE GROWTH FACTOR ANTIBOD\* OR ANTI-NGF OR FULRANUMABOR OR FULRANUMAB OR NERVE GROWTH FACTOR INHIBITOR\* OR NERVE GROWTH FACTOR ANTAGONIST\* OR NERVE GROWTH FACTOR BLOCKER\* OR NGF INHIBITOR\* OR NGF ANTAGONIST\* OR NGF BLOCKER\* OR NGF-AB OR FASINUMAB):TI,AB,KW (WORD VARIATIONS HAVE BEEN SEARCHED)

#23 MESH DESCRIPTOR: [CAPSAICIN] EXPLODE ALL TREES

#24 'CAPSAICIN OR CAPSAICINE OR AXSAIN OR ZOSTRIX OR CAPZASIN OR NGX-4010 OR NGX 4010 OR CAPSIN OR ADLEA OR ALGRX 4975 OR BIOZONE OR DECENOIC ACID OR QUTENZA':TI,AB,KW (WORD VARIATIONS HAVE BEEN SEARCHED)

#25 #23 OR #24

#26 'GAMMA-AMINOBUTYRIC ACID OR GAMMA AMINOBUTYRIC ACID\* OR GABA OR AMINALON\* OR GAMMALON OR HORIZANT OR GABAPENTIN OR CONVALLIS OR NEURONTIN':TI,AB,KW (WORD VARIATIONS HAVE BEEN SEARCHED)

#27 MESH DESCRIPTOR: [INJECTIONS, INTRA-ARTICULAR] EXPLODE ALL TREES

#28 'JOINT INJECTION\* OR INTRAARTICULAR\* OR INTRA-ARTICULAR\* OR INTRA ARTICULAR\*':TI,AB,KW (WORD VARIATIONS HAVE BEEN SEARCHED)

#29 MESH DESCRIPTOR: [DIATHERMY] EXPLODE ALL TREES

#30 MESH DESCRIPTOR: [HYPERTHERMIA, INDUCED] EXPLODE ALL TREES

#31 MESH DESCRIPTOR: [HOT TEMPERATURE] EXPLODE ALL TREES AND WITH QUALIFIER(S): [THERAPEUTIC USE - TU]

#32 'HEAT TREATMENT\* OR THERMAL THERAP\* OR DIATHERM\* OR HYPERTHERMIC THERAP\* OR HEAT THERAP\* OR THERAPEUTIC HEAT OR HEAT APPLICATION\* OR THERMOTHERAP\* OR LOCAL HEAT OR HOT PACK\* OR HEATING PAD\* OR DIATHERAP\* OR DIATHERMIA OR INDUCTOTHERMY':TI,AB,KW (WORD VARIATIONS HAVE BEEN SEARCHED)

#33 #29 OR #30 OR #31 OR #32

#34 'COLD BATH\* OR CRYOGENIC THERAP\* OR CRYOTHERM\* OR CRYO-TREATMENT\* OR CRYOTREATMENT\* OR COOLING THERAP\* OR COLD TREATMENT\* OR THERAPEUTIC COOLING OR CRYOTHERAP\* OR COLD THERAP\* OR HYPOTHERM\* OR ICE THERAP\* OR ICE PACK\*':TI,AB,KW (WORD VARIATIONS HAVE BEEN SEARCHED)

#35 #33 OR #34

- #36 MESH DESCRIPTOR: [RESISTANCE TRAINING] EXPLODE ALL TREES
- #37 MESH DESCRIPTOR: [MUSCLE STRENGTH] THIS TERM ONLY
- #38 (MUSCLE STRENGTH OR RESISTANCE TRAINING OR STRENGTH TRAINING OR STRENGTHEN\*):TI,AB,KW (WORD VARIATIONS HAVE BEEN SEARCHED)
- #39 #36 OR #37 OR #38
- #40 (AEROBICS\* OR AEROBIC EXERCISE\* OR AEROBIC ACTIVIT\* OR AEROBIC THERAP\*):TI,AB,KW (WORD VARIATIONS HAVE BEEN SEARCHED)
- #41 (NEUROMUSCULAR REEDUCATION OR NEURO-MUSCULAR REEDUCATION OR NEUROMUSCULAR RE-EDUCATION OR NEURO-MUSCULAR RE-EDUCATION OR NEMEX\* OR NEUROMUSCULAR TRAINING OR NEURO-MUSCULAR TRAINING OR NEURO-MUSCULAR EXERCISE\* OR NEUROMUSCULAR EXERCIS\*):TI,AB,KW (WORD VARIATIONS HAVE BEEN SEARCHED)
- #42 MESH DESCRIPTOR: [HYDROTHERAPY] EXPLODE ALL TREES
- #43 (AQUATICS OR AQUATIC EXERCISE\* OR AQUATIC ACTIVIT\* OR HYDROTHERAP\* OR WHIRLPOOL BATH\* OR KNEIPP THERAP\* OR WATER IMMERSION THERAP\*):TI,AB,KW (WORD VARIATIONS HAVE BEEN SEARCHED)
- #44 MESH DESCRIPTOR: [CIRCUIT-BASED EXERCISE] EXPLODE ALL TREES
- #45 (BALANCE TRAINING OR BALANCE EXERCISE\* OR BALANCE RE-EDUCATION OR BALANCE REEDUCATION OR CIRCUIT-BASED EXERCISE\* OR CIRCUIT TRAINING):TI,AB,KW (WORD VARIATIONS HAVE BEEN SEARCHED)
- #46 #45 OR #44
- #47 #43 OR #42
- #48 MESH DESCRIPTOR: [EXERCISE] EXPLODE ALL TREES
- #49 MESH DESCRIPTOR: [EXERCISE THERAPY] EXPLODE ALL TREES
- #50 EXERCISE\*
- #51 #48 OR #49 OR #50
- #52 MESH DESCRIPTOR: [WALKING] EXPLODE ALL TREES
- #53 WALKING OR AMBULATION
- #54 (#52 OR #53) AND DAILY
- #55 MESH DESCRIPTOR: [SELF EFFICACY] EXPLODE ALL TREES

- #56 MESH DESCRIPTOR: [PATIENT EDUCATION AS TOPIC] EXPLODE ALL TREES
- #57 MESH DESCRIPTOR: [PATIENT COMPLIANCE] EXPLODE ALL TREES
- #58 MESH DESCRIPTOR: [ADAPTATION, PSYCHOLOGICAL] THIS TERM ONLY
- #59 MESH DESCRIPTOR: [SELF CARE] THIS TERM ONLY
- #60 #55 OR #56 OR #57 OR #58 OR #59
- #61 MESH DESCRIPTOR: [COGNITIVE THERAPY] EXPLODE ALL TREES
- #62 'MINDFULNESS OR CBT-I OR COGNITIVE BEHAVIOR\* OR COGNITIVE BEHAVIOUR\* OR COGNITIVE THERAP\* OR CBT OR COGNITION THERAP\* OR COGNITIVE PSYCHOTHERAP\*':TI,AB,KW (WORD VARIATIONS HAVE BEEN SEARCHED)
- #63 #61 OR #62
- #64 MESH DESCRIPTOR: [WEIGHT LOSS] THIS TERM ONLY
- #65 (WEIGHT DECREAS\* OR WEIGHT LOSING OR WEIGHT REDUC\* OR WEIGHT WATCHING OR WEIGHT LOSS\*):TI,AB,KW (WORD VARIATIONS HAVE BEEN SEARCHED)
- #66 #65 OR #64
- #67 MESH DESCRIPTOR: [ACUPUNCTURE THERAPY] EXPLODE ALL TREES
- #68 MESH DESCRIPTOR: [ACUPUNCTURE] EXPLODE ALL TREES
- #69 (ACUPUNCTURE OR PHARMACOPUNCTURE\* OR ACUPRESSURE):TI,AB,KW (WORD VARIATIONS HAVE BEEN SEARCHED)
- #70 #67 OR #68 OR #69
- #71 MESH DESCRIPTOR: [MIND-BODY THERAPIES] EXPLODE ALL TREES
- #72 (YOGA OR THERAPEUTIC TOUCH OR REIKI OR LAYING-ON-OF-HANDS OR TAI JI OR TAI-JI OR TAI CHI OR TAI JI QUAN OR TAIJI OR TAIJIQUAN OR T'AI CHI OR RELAXATION THERAP\* OR RELAXATION TECHNIQUE\* OR RELAXATION TECHNICS OR PSYCHOPHYSIOLOGY OR PHYSIOLOGICAL PSYCHOLOGY OR PHYSIOLOGIC PSYCHOLOGY OR PSYCHODRAMA OR PSYCHODRAMA\* OR DRAMA THERAP\* OR DRAMATHERAP\* OR ROLE PLAYING OR MENTAL HEALING OR MEDITATION OR LAUGHTER THERAP\* OR IMAGERY PSYCHOTHERAPY OR IMAGERY OR DIRECTED REVERIE THERAP\* OR IMAGERIES OR SUGGESTION OR AUTOSUGGESTION\* OR PROGRESSIVE RELAXATION\* OR PROGRESSIVE MUSCLE RELAXATION\* OR AUTOGENIC TRAINING OR HYPNOSIS OR HYPNOSI\* OR HYPNOTISM\* OR HYPNOTHERAP\* OR MESMERISM\* OR QI GONG OR CH'I KUNG OR BREATHING EXERCISES OR BREATHING EXERCISE\* OR QIGONG\* OR NEUROFEEDBACK\* OR ALPHA FEEDBACK\* OR ELECTROMYOGRAPHY FEEDBACK\* OR EEG FEEDBACK\* OR BRAINWAVE FEEDBACK\* OR AROMATHERAPY



OR BIOFEEDBACK\* OR PSYCHOLOGICAL FEEDBACK\* OR MYOFEEDBACK\* OR PHYSIOLOGICAL FEEDBACK\* OR MIND-BODY THERAPIES OR MIND-BODY OR MIND BODY):TI,AB,KW (WORD VARIATIONS HAVE BEEN SEARCHED)

#73 #71 OR #72

#74 MESH DESCRIPTOR: [CANES] EXPLODE ALL TREES

#75 'CANE OR CANES OR WALKING STICK\*':TI,AB,KW (WORD VARIATIONS HAVE BEEN SEARCHED)

#76 MESH DESCRIPTOR: [TRANSCUTANEOUS ELECTRIC NERVE STIMULATION] EXPLODE ALL TREES

#77 (TRANSCUTANEOUS ELECTRIC NERVE STIMULATION OR TRANSCUTANEOUS ELECTRICAL NERVE STIMULATION OR ELECTROSTIMULATION\* OR ELECTROANALGESIA OR PERCUTANEOUS ELECTRIC NERVE STIMULATION\* OR TENS OR TRANSCUTANEOUS ELECTRICAL STIMULATION\* OR TRANSDERMAL ELECTROSTIMULATION\* OR PERCUTANEOUS ELECTRICAL NERVE STIMULATION\* OR TRANSCUTANEOUS ELECTRICAL NERVE STIMULATION\* OR TRANSCUTANEOUS ELECTRIC STIMULATION\* OR TRANSCUTANEOUS NERVE STIMULATION\* OR ANALGESIC CUTANEOUS ELECTROSTIMULATION\* OR ELECTROANALGESIA\* OR TRANSCUTANEOUS ELECTRIC NERVE STIMULATION OR TRANSCUTANEOUS ELECTROSTIMULATION):TI,AB,KW (WORD VARIATIONS HAVE BEEN SEARCHED)

#78 #76 OR #77

#79 MESH DESCRIPTOR: [PULSED RADIOFREQUENCY TREATMENT] EXPLODE ALL TREES

#80 MESH DESCRIPTOR: [ELECTRIC STIMULATION THERAPY] EXPLODE ALL TREES

#81 MESH DESCRIPTOR: [VIBRATION] EXPLODE ALL TREES AND WITH QUALIFIER(S): [THERAPEUTIC USE - TU]

#82 (PULSED RADIOFREQUENCY TREATMENT\* OR PULSED RADIO FREQUENCY TREATMENT\* OR ELECTRIC STIMULATION THERAPY OR ELECTROTHERAP\* OR ELECTRIC STIMULATION\* OR ELECTRICAL STIMULATION\* OR WHOLE BODY VIBRATION\* OR WBV OR VIBRATION TRAINING OR ELECTROPHYSICAL THERAP\* OR PULSED VIBRATION THERAP\*):TI,AB,KW (WORD VARIATIONS HAVE BEEN SEARCHED)

#83 #79 OR #80 OR #81 OR #82

#84 MESH DESCRIPTOR: [MASSAGE] EXPLODE ALL TREES

#85 (MASSAGE\* OR ZONE THERAP\* OR REFLEXOLOG\* OR ROLFING OR BODYWORK\*):TI,AB,KW (WORD VARIATIONS HAVE BEEN SEARCHED)

#86 #84 OR #85

#87 MESH DESCRIPTOR: [ACUPRESSURE] EXPLODE ALL TREES

#88 MESH DESCRIPTOR: [THERAPY, SOFT TISSUE] EXPLODE ALL TREES

- #89 MESH DESCRIPTOR: [MANIPULATION, OSTEOPATHIC] EXPLODE ALL TREES
- #90 MESH DESCRIPTOR: [MANIPULATION, CHIROPRACTIC] EXPLODE ALL TREES
- #91 MESH DESCRIPTOR: [MUSCULOSKELETAL MANIPULATIONS] EXPLODE ALL TREES
- #92 (OSTEOPATH\* OR ORTHOP\* OR SPINE OR SPINAL) AND (MANIPULAT\*):TI,AB,KW (WORD VARIATIONS HAVE BEEN SEARCHED)
- #93 (ACUPRESSURE OR SHIATSU OR ZHI YA OR CHIH YA OR SOFT TISSUE THERAP\* OR CHIROPRACTIC\* OR APPLIED KINESIOLOG\* OR MUSCULOSKELETAL MANIPULATION\* OR MANUAL THERAP\* OR MANIPULATION THERAP\* OR MANIPULATIVE THERAP\*):TI,AB,KW (WORD VARIATIONS HAVE BEEN SEARCHED)
- #94 #87 OR #88 OR #89 OR #90 OR #91 OR #92 OR #93
- #95 (PROLOTHERAP\* OR PROLIFERATIVE THERAP\*):TI,AB,KW (WORD VARIATIONS HAVE BEEN SEARCHED)
- #96 MESH DESCRIPTOR: [GLUCOSE SOLUTION, HYPERTONIC] EXPLODE ALL TREES
- #97 MESH DESCRIPTOR: [HYPERTONIC SOLUTIONS] EXPLODE ALL TREES
- #98 #97 AND DEXTROSE\*
- #99 MESH DESCRIPTOR: [MESENCHYMAL STROMAL CELLS] EXPLODE ALL TREES
- #100 MESH DESCRIPTOR: [PLATELET-RICH PLASMA] EXPLODE ALL TREES
- #101 MESH DESCRIPTOR: [ANESTHETICS] EXPLODE ALL TREES
- #102 MESH DESCRIPTOR: [SALINE SOLUTION, HYPERTONIC] EXPLODE ALL TREES
- #103 MESH DESCRIPTOR: [BOTULINUM TOXINS] EXPLODE ALL TREES
- #104 (ANESTHETIC\* OR ANAESTHETI\* OR SALINE\* OR SODIUM CHLORIDE SOLUTION\* OR "BONT/A" OR BOTULINIUM TOXIN OR BOTULINUM NEUROTOXIN OR BOTULINUS TOXIN OR BOTULISM TOXIN OR CLOSTRIDIUM BOTULINUM EXOTOXIN OR BOTULINUM TOXINS OR BOTULINUM TOXIN\* OR BOTULIN OR HYPERTONIC DEXTROSE\* OR HYPERTONIC GLUCOSE SOLUTION\* OR GLUCOSE HYPERTONIC SOLUTION\* OR MESENCHYMAL STROMAL CELL\* OR MESENCHYMAL STEM CELL\* OR MESENCHYMAL PROGENITOR CELL\* OR MULTIPOTENT BONE MARROW STROMAL CELL\* OR BONE MARROW STROMAL CELL\* OR WHARTON JELLY CELL\* OR WHARTON'S JELLY CELL\* OR WHARTONS JELLY CELL\* OR MSC OR THROMBOCYTE RICH PLASMA\* OR THROMBOCYTE-RICH PLASMA\* OR PLATELET-RICH PLASMA OR PRP OR PLATELET RICH PLASMA):TI,AB,KW (WORD VARIATIONS HAVE BEEN SEARCHED)
- #105 (#27 OR #28) AND (#96 OR #98 OR #99 OR #100 OR #101 OR #102 OR #103 OR #104)
- #106 #105 OR #95

#107 MESH DESCRIPTOR: [DIPHOSPHONATES] EXPLODE ALL TREES

#108 MESH DESCRIPTOR: [TECHNETIUM TC 99M MEDRONATE] EXPLODE ALL TREES

#109 MESH DESCRIPTOR: [RISEDRONATE SODIUM] EXPLODE ALL TREES

#110 MESH DESCRIPTOR: [ETIDRONIC ACID] EXPLODE ALL TREES

#111 'TECHNETIUM TC 99M MEDRONATE OR MEDRONATE OR 99MTC-MDP OR TECHNETIUM TC 99M METHYLENEDIPHOSPHONATE OR TC-99M MDP OR RISEDRONATE SODIUM OR RISEDRONATE OR RISEDRONIC ACID OR ACTONEL OR ATELVIA OR ETHANEHYDROXYDIPHOSPHONATE OR HEDSPA OR XIDIFON OR XYDIPHONE OR XIDIPHON OR DIDRONEL OR ETIDRONIC ACID\* OR ETIDRONATE\* OR EHDP OR ETHANEHYDROXYDIPHOSPHONATE OR HEDSPA OR XIDIFON OR XYDIPHONE OR XIDIPHON OR DIDRONEL OR CLODRONIC ACID OR DICHLOROMETHYLENEBISPHOSPHONATE\* OR DICHLOROMETHANEDIPHOSPHONATE OR CLODRONATE OR BONEFOS OR ALENDRONATE OR FOSAMAX OR MK-217 OR MK 217 OR DIPHOSPHONIC ACID DERIVATIVE\* OR BIPHOSPHONATE\* OR BISPHOSPHONIC ACID DERIVATIVE\* OR DIPHOSPHONATES OR DIPHOSPHONATE\* OR BISPHOSPHONATE\*!:TI,AB,KW (WORD VARIATIONS HAVE BEEN SEARCHED)

#112 #111 OR #110 OR #109 OR #108 OR #107

#113 MESH DESCRIPTOR: [VENLAFAXINE HYDROCHLORIDE] EXPLODE ALL TREES

#114 MESH DESCRIPTOR: [DESVENLAFAXINE SUCCINATE] EXPLODE ALL TREES

#115 FETZIMA OR PRISTIQ OR VENLAFAXINE HYDROCHLORIDE OR VENLAFAXINE OR EFFEXOR OR TREVILOR OR VANDRAL OR EFEXOR OR DOBUPAL OR SIBUTRAMINE OR REDUCTIL OR MERIDIA OR MILNACIPRAN OR MIDALCIPRAN OR LEVOMILNACIPRAN OR SAVELLA OR DESVENLAFAXINE OR CLOMIPRAMINE OR MILNACIPRAN OR SIBUTRAMINE OR TRIPLE REUPTAKE INHIBITOR\* OR VENLAFAXINE OR HYDIPHEN OR ANAFRANIL OR DUAL MONOAMINE REUPTAKE INHIBITOR OR DUAL MONOAMINE UPTAKE INHIBITOR OR DUAL REUPTAKE INHIBITOR OR DUAL UPTAKE INHIBITOR OR NORADRENALIN SEROTONIN REUPTAKE INHIBITOR OR NORADRENALIN SEROTONIN UPTAKE INHIBITOR OR NOREPINEPHRINE SEROTONIN REUPTAKE INHIBITOR OR NOREPINEPHRINE SEROTONIN UPTAKE INHIBITOR OR SELECTIVE SEROTONIN NORADRENALIN REUPTAKE INHIBITOR OR "SEROTONIN AND NORADRENALINE REUPTAKE INHIBITOR" OR "SEROTONIN AND NORADRENALINE UPTAKE INHIBITOR" OR "SEROTONIN AND NOREPINEPHRINE REUPTAKE INHIBITOR" OR "SEROTONIN AND NOREPINEPHRINE UPTAKE INHIBITOR" OR SEROTONIN NORADRENALIN UPTAKE INHIBITOR OR SEROTONIN NOREPINEPHRINE REUPTAKE INHIBITOR OR SEROTONIN NOREPINEPHRINE UPTAKE INHIBITOR OR SNRI OR SNRIS OR SSNRI OR SNRI\* OR "SEROTONIN AND NORADRENALINE REUPTAKE INHIBITOR" OR DUAL MONOAMINE REUPTAKE INHIBITOR OR DUAL MONOAMINE UPTAKE INHIBITOR OR DUAL REUPTAKE INHIBITOR OR DUAL UPTAKE INHIBITOR OR NORADRENALIN SEROTONIN REUPTAKE INHIBITOR OR NORADRENALIN SEROTONIN UPTAKE INHIBITOR OR NOREPINEPHRINE SEROTONIN REUPTAKE INHIBITOR OR NOREPINEPHRINE SEROTONIN UPTAKE INHIBITOR OR SELECTIVE SEROTONIN NORADRENALIN REUPTAKE INHIBITOR OR "SEROTONIN AND NORADRENALINE REUPTAKE INHIBITOR"

OR "SEROTONIN AND NORADRENALINE REUPTAKE INHIBITOR" OR "SEROTONIN AND NORADRENALINE UPTAKE INHIBITOR" OR "SEROTONIN AND NOREPINEPHRINE REUPTAKE INHIBITOR" OR "SEROTONIN AND NOREPINEPHRINE UPTAKE INHIBITOR" OR SEROTONIN NORADRENALIN UPTAKE INHIBITOR OR SEROTONIN NOREPINEPHRINE REUPTAKE INHIBITOR OR SEROTONIN NOREPINEPHRINE UPTAKE INHIBITOR OR SNRI OR SNRIS OR SSNRI OR SNRI\* OR "SEROTONIN AND NORADRENALINE REUPTAKE INHIBITOR":TI,AB,KW (WORD VARIATIONS HAVE BEEN SEARCHED)

#116 #115 OR #114 OR #113

#117 MESH DESCRIPTOR: [ANTIDEPRESSIVE AGENTS, TRICYCLIC] EXPLODE ALL TREES

#118 (2-HYDROXYDESIPRAMINE OR AMINEPTIN OR AMITRIPTYLINE OR CLOMIPRAMINE OR CYCLOBENZAPRINE OR DESIPRAMINE OR DESMETHYLDOXEPIN OR DIBENZEPIN OR DOTHIEPIN OR DOXEPIN OR IMIPRAMINE OR IPRINDOLE OR LOFEPRAMINE OR MELITRACENE OR METAPRAMINE OR MIRTAZAPINE OR NORTRIPTYLINE OR NOXIPTILIN OR OPIPRAMOL OR PROTRIPTYLINE OR TIANEPTINE OR TRIMIPRAMINE OR TRICYCLIC ANTIDEPRESSANT\* OR TRICYCLIC ANTIDEPRESSIVE\*):TI,AB,KW (WORD VARIATIONS HAVE BEEN SEARCHED)

#119 #117 OR #118

#120 MESH DESCRIPTOR: [PREGABALIN] EXPLODE ALL TREES

#121 (PREGABALIN OR LYRICA):TI,AB,KW (WORD VARIATIONS HAVE BEEN SEARCHED)

#122 #120 OR #121

#123 MESH DESCRIPTOR: [METHOTREXATE] EXPLODE ALL TREES

#124 (METHOTREXATE\* OR AMETHOPTERIN\* OR MEXATE OR METHYLPTEROYLGLUTAMIC ACID OR A METHOPTERINE OR AMETOPTERINE\* OR CL 14377 OR EMTHEXAT OR EMTREXATE OR FOLEX OR LEDERTREXATE OR METEX OR METHROTREXATE OR METHYLAMINOPTERIN OR METOJECT OR METHOTHREXATE OR METOTREXAT OR METOTREXATE OR METREX OR MPI 5004 OR MTX OR NEOTREXATE OR NSC 740 OR OTREXUP OR RHEUMATREX OR TEXATE OR TREXALL):TI,AB,KW (WORD VARIATIONS HAVE BEEN SEARCHED)

#125 #123 OR #124

#126 MESH DESCRIPTOR: [COLCHICINE] EXPLODE ALL TREES

#127 (LUMICOLCHICINES OR DEMECOLCINE OR COLCHAMINE OR COLCEMIDE OR COLCEMID OR COLCHICINE):TI,AB,KW (WORD VARIATIONS HAVE BEEN SEARCHED)

#128 #126 OR #127

#129 MESH DESCRIPTOR: [VITAMIN D] EXPLODE ALL TREES

#130 (DIHYDROTACHYSTEROL OR TACHYSTIN OR DIHYDROTACHYSTERIN OR CALCAMINE OR ERCALCIDIOL OR VITAMIN D2 OR VITAMIN D3 OR ERGOCALCIFEROL\* OR CALCIFEROLS OR HYDROXYCHOLECALCIFEROLS OR HYDROXYVITAMINS D OR HYDROXYCHOLECALCIFEROL OR CHOLECALCIFEROL OR CALCIOL OR CHOLECALCIFEROLS OR VITAMIN D OR CALCITRIOL OR DIHYDROXYCHOLECALCIFEROL OR "24,25-DIHYDROXY VITAMIN D3"):TI,AB,KW (WORD VARIATIONS HAVE BEEN SEARCHED)

#131 #129 OR #130

#132 MESH DESCRIPTOR: [FISH OILS] EXPLODE ALL TREES

#133 (EICOSAPENTAENOIC ACID OR EICOSAPENTANOIC ACID\* OR TIMNODONIC ACID OR DOCOSAHEXAENOIC ACID\* OR DOCOSAHEXAENOATE OR DOCOSAHEXAENOIC ACID\* OR OMEGA-3 FATTY ACID\* OR N3 FATTY ACID\* OR N3 PUFA OR N3 POLYUNSATURATED FATTY ACID\* OR N3 OILS OR N-3 PUFA OR N-3 FATTY ACID\* OR N 3 FATTY ACID\* OR N-3 POLYUNSATURATED FATTY ACID\* OR N 3 POLYUNSATURATED FATTY ACID\* OR OMEGA 3 FATTY ACID\* OR N-3 OILS OR N 3 OILS OR COD LIVER OIL OR FISH OILS OR FISH OIL\* OR FISH LIVER OIL\*):TI,AB,KW (WORD VARIATIONS HAVE BEEN SEARCHED)

#134 #132 OR #133

#135 MESH DESCRIPTOR: [TUMOR NECROSIS FACTOR-ALPHA] EXPLODE ALL TREES AND WITH QUALIFIER(S): [ANTAGONISTS & INHIBITORS - AI]

#136 MESH DESCRIPTOR: [CERTOLIZUMAB PEGOL] EXPLODE ALL TREES

#137 MESH DESCRIPTOR: [INFLIXIMAB] EXPLODE ALL TREES

#138 MESH DESCRIPTOR: [ETANERCEPT] EXPLODE ALL TREES

#139 MESH DESCRIPTOR: [ADALIMUMAB] EXPLODE ALL TREES

#140 (INFLIXIMAB OR MAB CA2 OR MONOCLONAL ANTIBODY CA2 OR REMICADE OR ETANERCEPT\* OR TNF RECEPTOR TYPE II-IGG FUSION PROTEIN\* OR TNF RECEPTOR TYPE II IGG FUSION PROTEIN\* OR ENBREL OR TNFR-FC FUSION PROTEIN\* OR TNFR FC FUSION PROTEIN\* OR TNR-001 OR TNR 001 OR TNT RECEPTOR FUSION PROTEIN\* OR ADALIMUMAB\* OR D2E7 ANTIBOD\* OR HUMIRA OR CERTOLIZUMAB PEGOL OR CERTOLIZUMAB OR CIMZIA\* OR CDP 870\* OR GOLIMUMAB OR SIMPONI OR ANTI TUMOR NECROSIS FACTOR AGENT\* OR ANTI TUMOUR NECROSIS FACTOR AGENT\* OR TNF ALPHA INHIBITOR\* OR TNF INHIBITOR\* OR TUMOUR NECROSIS FACTOR ALPHA INHIBITOR\* OR TUMOUR NECROSIS FACTOR INHIBITOR\* OR ANTI-TNF ALPHA AGENT\* OR ANTI TNF ALPHA AGENT\* OR ANTI TNF AGENT\* OR ANTI-TNF AGENT\* OR TUMOR NECROSIS FACTOR INHIBITOR\* OR TUMOR NECROSIS FACTOR ALPHA INHIBITOR\* OR TNF-ALPHA INHIBITOR\* OR CACHECTIN INHIBITOR\* OR TNF BLOCKER\* OR TNF ALPHA BLOCKER\* OR TUMOR NECROSIS FACTOR ALPHA BLOCKER\* OR TUMOUR NECROSIS FACTOR ALPHA BLOCKER\* OR TUMOR NECROSIS FACTOR BLOCKER\* OR TUMOUR NECROSIS FACTOR BLOCKER\* OR INFLECTRA OR INFLIXIMAB-DYYB):TI,AB,KW (WORD VARIATIONS HAVE BEEN SEARCHED)

#141 #135 OR #136 OR #137 OR #138 OR #139 OR #140

#142 MESH DESCRIPTOR: [INTERLEUKIN 1 RECEPTOR ANTAGONIST PROTEIN] EXPLODE ALL TREES

#143 MESH DESCRIPTOR: [INTERLEUKIN-1] EXPLODE ALL TREES AND WITH QUALIFIER(S):  
[ANTAGONISTS & INHIBITORS - AI]

#144 ("INTERLEUKIN 1 RECEPTOR ANTAGONIST PROTEIN" OR IL 1 FEBRILE INHIBITOR\* OR KINERET OR ANAKINRA OR ANTRIL OR IL1 FEBRILE INHIBITOR\* OR IL-1RA OR ANTI-IL-1 OR ANTI-INTERLEUKIN-1 OR IL-1 INHIBITOR\* OR IL-1 ANTAGONIST\* OR INTERLEUKIN 1 INHIBITOR\* OR INTERLEUKIN 1 ANTAGONIST\* OR ANTI-IL-1 OR ANTI-INTERLEUKIN-1 IL-1 INHIBITOR\* OR IL-1 ANTAGONIST\* OR INTERLEUKIN 1 INHIBITOR\* OR INTERLEUKIN 1 ANTAGONIST\*):TI,AB,KW (WORD VARIATIONS HAVE BEEN SEARCHED)

#145 #142 OR #143 OR #144

#146 MESH DESCRIPTOR: [CATHETER ABLATION] EXPLODE ALL TREES

#147 (RADIOFREQUENCY ABLATION\* OR CATHETER ABLATION\* OR TRANSVENOUS ELECTRIC ABLATION\* OR TRANSVENOUS ELECTRICAL ABLATION\*):TI,AB,KW (WORD VARIATIONS HAVE BEEN SEARCHED)

#148 #146 OR #147

#149 MESH DESCRIPTOR: [LIDOCAINE] EXPLODE ALL TREES

#150 (LIDOCAINE OR LIGNOCAINE OR OCTOCAINE OR XYLOCAINE OR XYLOCITIN):TI,AB,KW (WORD VARIATIONS HAVE BEEN SEARCHED)

#151 #149 OR #150

#152 MESH DESCRIPTOR: [ADMINISTRATION, TOPICAL] THIS TERM ONLY

#153 TOPICAL\*:TI,AB,KW (WORD VARIATIONS HAVE BEEN SEARCHED)

#154 #151 AND (#152 OR #153)

#155 MESH DESCRIPTOR: [BETAMETHASONE] EXPLODE ALL TREES

#156 MESH DESCRIPTOR: [TRIAMCINOLONE ACETONIDE] EXPLODE ALL TREES

#157 MESH DESCRIPTOR: [ADRENAL CORTEX HORMONES] EXPLODE ALL TREES

#158 MESH DESCRIPTOR: [DEXAMETHASONE] EXPLODE ALL TREES

#159 (DEXASONE OR MAXIDEX OR MILLICORTEN OR ORADEXON OR HEXADROL OR BETAMETHASONE OR CELESTONA OR CELESTON OR CELESTONE OR TRIAMCINOLONE OR TRICORT-40 OR TRICORT 40 OR KENALOG OR AZMACORT OR KENACORT OR METHYLPREDNISOLONE OR DEPO-MEDROL OR DEPO-

MEDRONE OR ADRENOCORTICAL HORMONE\* OR ADRENAL CORTEX HORMONE\* OR CORTICOSTEROID\* OR CORTICOID\*):TI,AB,KW (WORD VARIATIONS HAVE BEEN SEARCHED)

#160 #159 OR #158 OR #157 OR #156 OR #155

#161 MESH DESCRIPTOR: [HYALURONIC ACID] EXPLODE ALL TREES

#162 (ADANT OR AMVISC PLUS OR ARTHREASE OR ARTZ OR BIONECT OR DUOVISC OR DUROLANE OR EYECON OR HEALON YELLOW OR HEALON5 OR HEALONID OR HIALID OR HYALCON OR HYALEIN OR HYALGAN OR HYALOVET OR HYALUBRIX OR HYALURONATE OR HYLAFORM OR HYLAN G F 20 OR HYLAN G-F 20 OR HYLARTIN V OR HYLO-COMOD OR HYRUAN OR IALUGEN OR JUVEDERM OR LAGRICEL OFTENOR OR LASERVIS OR ME 3710 OR MONOVISC OR NA HYLAN OR NA-HYLAN OR NRD 101 OR NRD101 OR OPHTHALIN OR ORTHOVISC OR OSTENIL OR PERLANE OR POTASSIUM HYALURONATE OR PROVISC OR RADIAPLEXRX OR RESTYLANE OR SI 4402 OR SINOVIAL OR SL 1010 OR SODIUM HYALURONATE OR SPERM SELECT OR SUPARTZ OR SUPLASYN OR SYNOCROM OR SYNVISC OR TEOSYAL OR VISCOSEAL OR VISMED OR VITRAX OR HYALURONIC ACID\* OR AMO VITRAX OR BIOLON OR HYALURONAN OR HYVISC OR LURONIT OR AMVISC OR HEALON):TI,AB,KW (WORD VARIATIONS HAVE BEEN SEARCHED)

#163 #161 OR #162

#164 (#5 OR #7 OR #9 OR #13 OR #15 OR #18 OR #21 OR #22 OR #26 OR #33 OR #35 OR #39 OR #40 OR #41 OR #47 OR #46 OR #54 OR #51 OR #60 OR #63 OR #66 OR #70 OR #73 OR #75 OR #78 OR #83 OR #86 OR #94 OR #106 OR #112 OR #116 OR #119 OR #122 OR #125 OR #128 OR #131 OR #134 OR #141 OR #145) IN TRIALS

#165 #28 AND (#160 OR #163)

#166 #165 OR #164 IN TRIALS

#167 MESH DESCRIPTOR: [ADMINISTRATION, TOPICAL] EXPLODE ALL TREES

#168 (HYDROGEL\* OR TAPE OR TAPES OR PATCH\* OR PERCUTANEOUS\* OR OINTMENT\* OR TRANSDERMAL\* OR CUTANEOUS\* OR DERMAL ADMINISTRATION\* OR INTRAEPIDERMAL\* CREAM\* OR OINTMENT\* OR PASTE\* OR GEL OR GELS OR TOPICAL\* OR TRANSCUTANEOUS\*):TI,AB,KW (WORD VARIATIONS HAVE BEEN SEARCHED)

#169 #5 AND (#167 OR #168)

#170 BRACE\*:TI,AB,KW (WORD VARIATIONS HAVE BEEN SEARCHED)

#171 MESH DESCRIPTOR: [SHOES] EXPLODE ALL TREES

#172 MESH DESCRIPTOR: [FOOT ORTHOSES] EXPLODE ALL TREES

#173 (SHOES OR MODIFIED SHOE\* OR WEDGE SHOE\* OR APOSTHERAPY OR FOOT ORTHOSES OR FOOT ORTHOS\* OR FOOT ORTHOT\* OR FOOT ARCH SUPPORT\* OR SHOE INSERT\* OR ORTHOTIC

INSOLE\* OR WEDGE ORTHOTIC\* OR WEDGE INSOLE\* OR LWI OR LWIS):TI,AB,KW (WORD VARIATIONS HAVE BEEN SEARCHED)

#174 #171 OR #172 OR #173

#175 MESH DESCRIPTOR: [ORTHOTIC DEVICES] THIS TERM ONLY

#176 #175 AND (FOOT OR FEET OR KNEE)

#177 (RETRAINING OR TRAINING) AND (GAIT AND #175)

#178 #174 OR #176 OR #177

#179 (#25 OR #169 OR #148 OR #154 OR #170 OR #178) IN TRIALS

#180 #179 OR #166

#181 MESH DESCRIPTOR: [PATELLOFEMORAL JOINT] EXPLODE ALL TREES

#182 (FEMORAL PATELLAR OR FEMUR PATELLAR OR PATELLOFEMORAL OR PATELLO-FEMORAL OR FEMOROPATELLAR OR FEMORO-PATELLAR):TI,AB,KW (WORD VARIATIONS HAVE BEEN SEARCHED)

#183 #181 OR #182

#184 MESH DESCRIPTOR: [OSTEOARTHRITIS] THIS TERM ONLY

#185 MESH DESCRIPTOR: [OSTEOARTHRITIS, KNEE] EXPLODE ALL TREES

#186 (OSTEOARTH\* OR DEGENERATIVE ARTHRITIDES OR DEGENERATIVE ARTHRITIS OR NONINFLAMMATORY ARTHRITIS OR NON-INFLAMMATORY ARTHRITIS OR ARTHROSIS OR DEGENERATIVE JOINT DISEASE\* OR OSTEO-ARTHRITIS OR OSTEO-ARTHROSIS OR RHEUMATOID ARTHROSIS):TI,AB,KW (WORD VARIATIONS HAVE BEEN SEARCHED)

#187 #183 AND (#184 OR #185 OR #186)

#188 MESH DESCRIPTOR: [BANDAGES] EXPLODE ALL TREES

#189 (BANDAGE\* OR TAPE OR TAPES OR TAPING OR TAPED):TI,AB,KW (WORD VARIATIONS HAVE BEEN SEARCHED)

#190 #188 OR #189

#191 #187 AND #190 IN TRIALS

#192 #191 OR #180

#193 (OSTEOARTHRITIS\* OR OSTEOARTHRITIDES OR OSTEOARTHROSIS OR DEGENERATIVE ARTHRITIDES OR DEGENERATIVE ARTHRITIS OR NONINFLAMMATORY ARTHRITIS OR NON-INFLAMMATORY ARTHRITIS OR ARTHROSIS OR DEGENERATIVE JOINT DISEASE\* OR OSTEO-ARTHRITIS OR



OSTEO-ARTHROSIS OR OSTEOARTHROSIS OR RHEUMATOID ARTHROSIS):TI,AB,KW (WORD VARIATIONS HAVE BEEN SEARCHED)

#194 MESH DESCRIPTOR: [HAND] EXPLODE ALL TREES

#195 (HAND OR HANDS OR FINGER\* OR THUMB\* OR METACARP\* OR WRIST):TI,AB,KW (WORD VARIATIONS HAVE BEEN SEARCHED)

#196 (#194 OR #195) AND (#1 OR #2) IN TRIALS

#197 #6 OR #7

#198 #8 OR #9

#199 MESH DESCRIPTOR: [IONTOPHORESIS] EXPLODE ALL TREES

#200 IONTOPHORES\*:TI,AB,KW (WORD VARIATIONS HAVE BEEN SEARCHED)

#201 #199 OR #200

#202 (#27 OR #28) AND (#160 OR #161)

#203 MESH DESCRIPTOR: [PARAFFIN] EXPLODE ALL TREES

#204 (PARAFFIN OR PARAFFINUM):TI,AB,KW (WORD VARIATIONS HAVE BEEN SEARCHED)

#205 #203 OR #204

#206 MESH DESCRIPTOR: [HEALTH EDUCATION] EXPLODE ALL TREES

#207 MESH DESCRIPTOR: [PATIENT EDUCATION AS TOPIC] THIS TERM ONLY

#208 (HEALTH EDUCATION OR CONSUMER HEALTH INFORMATION OR EDUCATING PATIENT\* OR "EDUCATION OF PATIENT"):TI,AB,KW (WORD VARIATIONS HAVE BEEN SEARCHED)

#209 #206 OR #207 OR #208

#210 (EDUCATION PROGRAM\* OR EDUCATIONAL PROGRAM\* OR TRAINING PROGRAM\*) AND (PATIENT OR PATIENTS OR PATIENT-CENTERED OR PATIENT-FOCUSED)

#211 #209 OR #210

#212 MESH DESCRIPTOR: [OCCUPATIONAL THERAPY] EXPLODE ALL TREES

#213 (HAND THERAP\* OR OCCUPATIONAL THERAPY OR PHYSIOTHERAP\* OR ERGOTHERAP\*):TI,AB,KW (WORD VARIATIONS HAVE BEEN SEARCHED)

#214 #212 OR #213

#215 MESH DESCRIPTOR: [THUMB] EXPLODE ALL TREES

#216 MESH DESCRIPTOR: [FINGERS] EXPLODE ALL TREES

#217 (FINGER\* OR THUMB\* OR DIGIT OR DIGITS):TI,AB,KW (WORD VARIATIONS HAVE BEEN SEARCHED)

#218 MESH DESCRIPTOR: [BRACES] EXPLODE ALL TREES

#219 MESH DESCRIPTOR: [ATHLETIC TAPE] EXPLODE ALL TREES

#220 MESH DESCRIPTOR: [ORTHOTIC DEVICES] THIS TERM ONLY

#221 (ORTHOSIS OR BRACE\* OR ATHLETIC TAPE OR KINESIOTAP\* OR ORTHOTIC TAPE\* OR ORTHOTIC DEVICE\* OR ORTHOSE\* OR PARAPODIUM\*):TI,AB,KW (WORD VARIATIONS HAVE BEEN SEARCHED)

#222 (#221 OR #220 OR #219 OR #218) AND (#217 OR #216 OR #215)

#223 MESH DESCRIPTOR: [GLOVES, PROTECTIVE] EXPLODE ALL TREES

#224 GLOVE\*:TI,AB,KW (WORD VARIATIONS HAVE BEEN SEARCHED)

#225 #223 OR #224

#226 "SPICA":TI,AB,KW (WORD VARIATIONS HAVE BEEN SEARCHED)

#227 MESH DESCRIPTOR: [SPLINTS] EXPLODE ALL TREES

#228 (SPLINT\* OR STATIC ORTHOS\*):TI,AB,KW (WORD VARIATIONS HAVE BEEN SEARCHED)

#229 #227 OR #228

#230 #196 AND (#5 OR #197 OR #198 OR #12 OR #15 OR #18 OR #21 OR #22 OR #169 OR #25 OR #201 OR #202 OR #51 OR #205 OR #33 OR #35 OR #211 OR #214 OR #70 OR #222 OR #225 OR #39 OR #226 OR #229)
