# Supplementary material
Source: PubMed Central journal article supplement (PMC10518852)

**SUPPLEMENTARY APPENDIX 5: Flowchart of the Study Selection Process**

**ACR/AF 2019 Guideline for the Management of Osteoarthritis of the Hand, Hip and Knee**

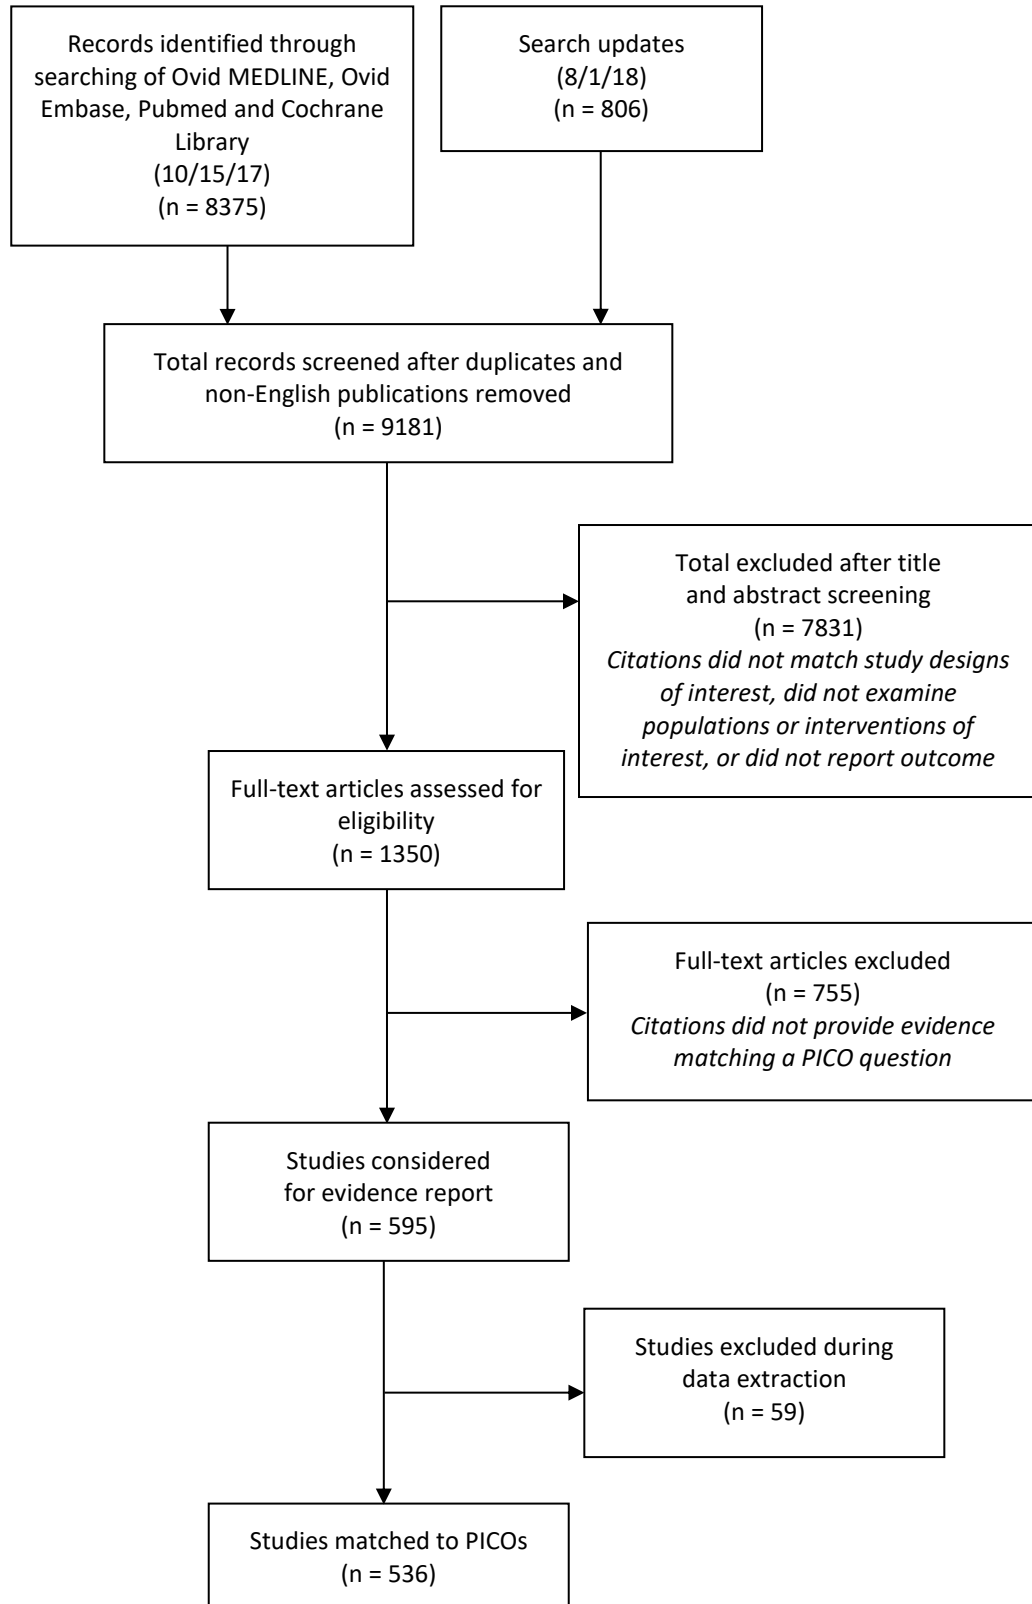

Supplement: NIHMS1921827-supplement-Apend_5.pdf [file NIHMS1921827-supplement-Apend_5.pdf]
